# Supplementary material
Source: ML conference proceedings conference paper supplement (https://aclanthology.org/2020.findings-emnlp.419)
Supplement: OptionalSupplementaryMaterial [file 2020.findings-emnlp.419.OptionalSupplementaryMaterial.zip]

Archive with 806 entries (741 files):
- EMNLP_Appendix.pdf
- __MACOSX/._EMNLP_Appendix.pdf
- AttentionGuidance-main/
- __MACOSX/._AttentionGuidance-main
- AttentionGuidance-main/.DS_Store
- __MACOSX/AttentionGuidance-main/._.DS_Store
- AttentionGuidance-main/attention_guidance/
- __MACOSX/AttentionGuidance-main/._attention_guidance
- AttentionGuidance-main/LICENSE
- __MACOSX/AttentionGuidance-main/._LICENSE
- AttentionGuidance-main/linguistic_probing/
- __MACOSX/AttentionGuidance-main/._linguistic_probing
- AttentionGuidance-main/resources/
- __MACOSX/AttentionGuidance-main/._resources
- AttentionGuidance-main/README.md
- __MACOSX/AttentionGuidance-main/._README.md
- AttentionGuidance-main/.gitignore
- __MACOSX/AttentionGuidance-main/._.gitignore
- AttentionGuidance-main/attention_guidance/LICENSE
- __MACOSX/AttentionGuidance-main/attention_guidance/._LICENSE
- AttentionGuidance-main/attention_guidance/utils/
- __MACOSX/AttentionGuidance-main/attention_guidance/._utils
- AttentionGuidance-main/attention_guidance/requirements/
- __MACOSX/AttentionGuidance-main/attention_guidance/._requirements
- AttentionGuidance-main/attention_guidance/ag_config/
- __MACOSX/AttentionGuidance-main/attention_guidance/._ag_config
- AttentionGuidance-main/attention_guidance/README.md
- __MACOSX/AttentionGuidance-main/attention_guidance/._README.md
- AttentionGuidance-main/attention_guidance/setup.py
- __MACOSX/AttentionGuidance-main/attention_guidance/._setup.py
- AttentionGuidance-main/attention_guidance/examples/
- __MACOSX/AttentionGuidance-main/attention_guidance/._examples
- AttentionGuidance-main/attention_guidance/scripts/
- __MACOSX/AttentionGuidance-main/attention_guidance/._scripts
- AttentionGuidance-main/attention_guidance/setup.cfg
- __MACOSX/AttentionGuidance-main/attention_guidance/._setup.cfg
- AttentionGuidance-main/attention_guidance/ag_models/
- __MACOSX/AttentionGuidance-main/attention_guidance/._ag_models
- AttentionGuidance-main/attention_guidance/runs/
- __MACOSX/AttentionGuidance-main/attention_guidance/._runs
- AttentionGuidance-main/attention_guidance/src/
- __MACOSX/AttentionGuidance-main/attention_guidance/._src
- AttentionGuidance-main/linguistic_probing/requirements.txt
- __MACOSX/AttentionGuidance-main/linguistic_probing/._requirements.txt
- AttentionGuidance-main/linguistic_probing/run_coreference.py
- __MACOSX/AttentionGuidance-main/linguistic_probing/._run_coreference.py
- AttentionGuidance-main/linguistic_probing/utils_pretrain.py
- __MACOSX/AttentionGuidance-main/linguistic_probing/._utils_pretrain.py
- AttentionGuidance-main/linguistic_probing/reflexive.txt
- __MACOSX/AttentionGuidance-main/linguistic_probing/._reflexive.txt
- AttentionGuidance-main/linguistic_probing/small_reflexive.txt
- __MACOSX/AttentionGuidance-main/linguistic_probing/._small_reflexive.txt
- AttentionGuidance-main/linguistic_probing/README.md
- __MACOSX/AttentionGuidance-main/linguistic_probing/._README.md
- AttentionGuidance-main/linguistic_probing/get_reflixive.py
- __MACOSX/AttentionGuidance-main/linguistic_probing/._get_reflixive.py
- AttentionGuidance-main/linguistic_probing/wandb_utils.py
- __MACOSX/AttentionGuidance-main/linguistic_probing/._wandb_utils.py
- AttentionGuidance-main/resources/.DS_Store
- __MACOSX/AttentionGuidance-main/resources/._.DS_Store
- AttentionGuidance-main/attention_guidance/utils/link_tester.py
- __MACOSX/AttentionGuidance-main/attention_guidance/utils/._link_tester.py
- AttentionGuidance-main/attention_guidance/utils/download_glue_data.py
- __MACOSX/AttentionGuidance-main/attention_guidance/utils/._download_glue_data.py
- AttentionGuidance-main/attention_guidance/requirements/requirements.txt
- __MACOSX/AttentionGuidance-main/attention_guidance/requirements/._requirements.txt
- AttentionGuidance-main/attention_guidance/requirements/environment.yml
- __MACOSX/AttentionGuidance-main/attention_guidance/requirements/._environment.yml
- AttentionGuidance-main/attention_guidance/ag_config/oromo_config/
- __MACOSX/AttentionGuidance-main/attention_guidance/ag_config/._oromo_config
- AttentionGuidance-main/attention_guidance/ag_config/roberta_8/
- __MACOSX/AttentionGuidance-main/attention_guidance/ag_config/._roberta_8
- AttentionGuidance-main/attention_guidance/ag_config/roberta_12/
- __MACOSX/AttentionGuidance-main/attention_guidance/ag_config/._roberta_12
- AttentionGuidance-main/attention_guidance/ag_config/filipino_config/
- __MACOSX/AttentionGuidance-main/attention_guidance/ag_config/._filipino_config
- AttentionGuidance-main/attention_guidance/ag_config/roberta_self_48/
- __MACOSX/AttentionGuidance-main/attention_guidance/ag_config/._roberta_self_48
- AttentionGuidance-main/attention_guidance/ag_config/roberta_self_24/
- __MACOSX/AttentionGuidance-main/attention_guidance/ag_config/._roberta_self_24
- AttentionGuidance-main/attention_guidance/ag_config/roberta_4/
- __MACOSX/AttentionGuidance-main/attention_guidance/ag_config/._roberta_4
- AttentionGuidance-main/attention_guidance/ag_config/roberta_16/
- __MACOSX/AttentionGuidance-main/attention_guidance/ag_config/._roberta_16
- AttentionGuidance-main/attention_guidance/examples/question-answering/
- __MACOSX/AttentionGuidance-main/attention_guidance/examples/._question-answering
- AttentionGuidance-main/attention_guidance/examples/text-generation/
- __MACOSX/AttentionGuidance-main/attention_guidance/examples/._text-generation
- AttentionGuidance-main/attention_guidance/examples/requirements.txt
- __MACOSX/AttentionGuidance-main/attention_guidance/examples/._requirements.txt
- AttentionGuidance-main/attention_guidance/examples/adversarial/
- __MACOSX/AttentionGuidance-main/attention_guidance/examples/._adversarial
- AttentionGuidance-main/attention_guidance/examples/translation/
- __MACOSX/AttentionGuidance-main/attention_guidance/examples/._translation
- AttentionGuidance-main/attention_guidance/examples/summarization/
- __MACOSX/AttentionGuidance-main/attention_guidance/examples/._summarization
- AttentionGuidance-main/attention_guidance/examples/text-classification/
- __MACOSX/AttentionGuidance-main/attention_guidance/examples/._text-classification
- AttentionGuidance-main/attention_guidance/examples/lightning_base.py
- __MACOSX/AttentionGuidance-main/attention_guidance/examples/._lightning_base.py
- AttentionGuidance-main/attention_guidance/examples/distillation/
- __MACOSX/AttentionGuidance-main/attention_guidance/examples/._distillation
- AttentionGuidance-main/attention_guidance/examples/language-modeling/
- __MACOSX/AttentionGuidance-main/attention_guidance/examples/._language-modeling
- AttentionGuidance-main/attention_guidance/examples/token-classification/
- __MACOSX/AttentionGuidance-main/attention_guidance/examples/._token-classification
- AttentionGuidance-main/attention_guidance/examples/contrib/
- __MACOSX/AttentionGuidance-main/attention_guidance/examples/._contrib
- AttentionGuidance-main/attention_guidance/examples/README.md
- __MACOSX/AttentionGuidance-main/attention_guidance/examples/._README.md
- AttentionGuidance-main/attention_guidance/examples/xla_spawn.py
- __MACOSX/AttentionGuidance-main/attention_guidance/examples/._xla_spawn.py
- AttentionGuidance-main/attention_guidance/examples/movement-pruning/
- __MACOSX/AttentionGuidance-main/attention_guidance/examples/._movement-pruning
- AttentionGuidance-main/attention_guidance/examples/benchmarking/
- __MACOSX/AttentionGuidance-main/attention_guidance/examples/._benchmarking
- AttentionGuidance-main/attention_guidance/examples/bertology/
- __MACOSX/AttentionGuidance-main/attention_guidance/examples/._bertology
- AttentionGuidance-main/attention_guidance/examples/test_examples.py
- __MACOSX/AttentionGuidance-main/attention_guidance/examples/._test_examples.py
- AttentionGuidance-main/attention_guidance/examples/multiple-choice/
- __MACOSX/AttentionGuidance-main/attention_guidance/examples/._multiple-choice
- AttentionGuidance-main/attention_guidance/scripts/create_tokenizer.py
- __MACOSX/AttentionGuidance-main/attention_guidance/scripts/._create_tokenizer.py
- AttentionGuidance-main/attention_guidance/scripts/run_lm_gridsearch.py
- __MACOSX/AttentionGuidance-main/attention_guidance/scripts/._run_lm_gridsearch.py
- AttentionGuidance-main/attention_guidance/scripts/download_wikitext.sh
- __MACOSX/AttentionGuidance-main/attention_guidance/scripts/._download_wikitext.sh
- AttentionGuidance-main/attention_guidance/ag_models/run_language_modeling_ag.py
- __MACOSX/AttentionGuidance-main/attention_guidance/ag_models/._run_language_modeling_ag.py
- AttentionGuidance-main/attention_guidance/ag_models/ag_utils.py
- __MACOSX/AttentionGuidance-main/attention_guidance/ag_models/._ag_utils.py
- AttentionGuidance-main/attention_guidance/ag_models/wandb_utils.py
- __MACOSX/AttentionGuidance-main/attention_guidance/ag_models/._wandb_utils.py
- AttentionGuidance-main/attention_guidance/runs/Oct05_00-45-34_node719.ionic.cs.princeton.edu/
- __MACOSX/AttentionGuidance-main/attention_guidance/runs/._Oct05_00-45-34_node719.ionic.cs.princeton.edu
- AttentionGuidance-main/attention_guidance/runs/Oct05_00-37-15_node719.ionic.cs.princeton.edu/
- __MACOSX/AttentionGuidance-main/attention_guidance/runs/._Oct05_00-37-15_node719.ionic.cs.princeton.edu
- AttentionGuidance-main/attention_guidance/src/transformers/
- __MACOSX/AttentionGuidance-main/attention_guidance/src/._transformers
- AttentionGuidance-main/attention_guidance/src/transformers.egg-info/
- __MACOSX/AttentionGuidance-main/attention_guidance/src/._transformers.egg-info
- AttentionGuidance-main/attention_guidance/ag_config/oromo_config/roberta_8/
- __MACOSX/AttentionGuidance-main/attention_guidance/ag_config/oromo_config/._roberta_8
- AttentionGuidance-main/attention_guidance/ag_config/oromo_config/roberta_12/
- __MACOSX/AttentionGuidance-main/attention_guidance/ag_config/oromo_config/._roberta_12
- AttentionGuidance-main/attention_guidance/ag_config/oromo_config/self_attention_24/
- __MACOSX/AttentionGuidance-main/attention_guidance/ag_config/oromo_config/._self_attention_24
- AttentionGuidance-main/attention_guidance/ag_config/oromo_config/self_attention_48/
- __MACOSX/AttentionGuidance-main/attention_guidance/ag_config/oromo_config/._self_attention_48
- AttentionGuidance-main/attention_guidance/ag_config/oromo_config/roberta_16/
- __MACOSX/AttentionGuidance-main/attention_guidance/ag_config/oromo_config/._roberta_16
- AttentionGuidance-main/attention_guidance/ag_config/roberta_8/tokenizer_config.json
- __MACOSX/AttentionGuidance-main/attention_guidance/ag_config/roberta_8/._tokenizer_config.json
- AttentionGuidance-main/attention_guidance/ag_config/roberta_8/config.json
- __MACOSX/AttentionGuidance-main/attention_guidance/ag_config/roberta_8/._config.json
- AttentionGuidance-main/attention_guidance/ag_config/roberta_8/merges.txt
- __MACOSX/AttentionGuidance-main/attention_guidance/ag_config/roberta_8/._merges.txt
- AttentionGuidance-main/attention_guidance/ag_config/roberta_8/vocab.json
- __MACOSX/AttentionGuidance-main/attention_guidance/ag_config/roberta_8/._vocab.json
- AttentionGuidance-main/attention_guidance/ag_config/roberta_12/tokenizer_config.json
- __MACOSX/AttentionGuidance-main/attention_guidance/ag_config/roberta_12/._tokenizer_config.json
- AttentionGuidance-main/attention_guidance/ag_config/roberta_12/config.json
- __MACOSX/AttentionGuidance-main/attention_guidance/ag_config/roberta_12/._config.json
- AttentionGuidance-main/attention_guidance/ag_config/roberta_12/merges.txt
- __MACOSX/AttentionGuidance-main/attention_guidance/ag_config/roberta_12/._merges.txt
- AttentionGuidance-main/attention_guidance/ag_config/roberta_12/vocab.json
- __MACOSX/AttentionGuidance-main/attention_guidance/ag_config/roberta_12/._vocab.json
- AttentionGuidance-main/attention_guidance/ag_config/filipino_config/bert_16/
- __MACOSX/AttentionGuidance-main/attention_guidance/ag_config/filipino_config/._bert_16
- AttentionGuidance-main/attention_guidance/ag_config/filipino_config/bert_8/
- __MACOSX/AttentionGuidance-main/attention_guidance/ag_config/filipino_config/._bert_8
- AttentionGuidance-main/attention_guidance/ag_config/filipino_config/self_attention_24/
- __MACOSX/AttentionGuidance-main/attention_guidance/ag_config/filipino_config/._self_attention_24
- AttentionGuidance-main/attention_guidance/ag_config/filipino_config/self_attention_48/
- __MACOSX/AttentionGuidance-main/attention_guidance/ag_config/filipino_config/._self_attention_48
- AttentionGuidance-main/attention_guidance/ag_config/roberta_self_48/tokenizer_config.json
- __MACOSX/AttentionGuidance-main/attention_guidance/ag_config/roberta_self_48/._tokenizer_config.json
- AttentionGuidance-main/attention_guidance/ag_config/roberta_self_48/config.json
- __MACOSX/AttentionGuidance-main/attention_guidance/ag_config/roberta_self_48/._config.json
- AttentionGuidance-main/attention_guidance/ag_config/roberta_self_48/merges.txt
- __MACOSX/AttentionGuidance-main/attention_guidance/ag_config/roberta_self_48/._merges.txt
- AttentionGuidance-main/attention_guidance/ag_config/roberta_self_48/vocab.json
- __MACOSX/AttentionGuidance-main/attention_guidance/ag_config/roberta_self_48/._vocab.json
- AttentionGuidance-main/attention_guidance/ag_config/roberta_self_24/tokenizer_config.json
- __MACOSX/AttentionGuidance-main/attention_guidance/ag_config/roberta_self_24/._tokenizer_config.json
- AttentionGuidance-main/attention_guidance/ag_config/roberta_self_24/config.json
- __MACOSX/AttentionGuidance-main/attention_guidance/ag_config/roberta_self_24/._config.json
- AttentionGuidance-main/attention_guidance/ag_config/roberta_self_24/merges.txt
- __MACOSX/AttentionGuidance-main/attention_guidance/ag_config/roberta_self_24/._merges.txt
- AttentionGuidance-main/attention_guidance/ag_config/roberta_self_24/vocab.json
- __MACOSX/AttentionGuidance-main/attention_guidance/ag_config/roberta_self_24/._vocab.json
- AttentionGuidance-main/attention_guidance/ag_config/roberta_4/tokenizer_config.json
- __MACOSX/AttentionGuidance-main/attention_guidance/ag_config/roberta_4/._tokenizer_config.json
- AttentionGuidance-main/attention_guidance/ag_config/roberta_4/config.json
- __MACOSX/AttentionGuidance-main/attention_guidance/ag_config/roberta_4/._config.json
- AttentionGuidance-main/attention_guidance/ag_config/roberta_4/merges.txt
- __MACOSX/AttentionGuidance-main/attention_guidance/ag_config/roberta_4/._merges.txt
- AttentionGuidance-main/attention_guidance/ag_config/roberta_4/vocab.json
- __MACOSX/AttentionGuidance-main/attention_guidance/ag_config/roberta_4/._vocab.json
- AttentionGuidance-main/attention_guidance/ag_config/roberta_16/tokenizer_config.json
- __MACOSX/AttentionGuidance-main/attention_guidance/ag_config/roberta_16/._tokenizer_config.json
- AttentionGuidance-main/attention_guidance/ag_config/roberta_16/config.json
- __MACOSX/AttentionGuidance-main/attention_guidance/ag_config/roberta_16/._config.json
- AttentionGuidance-main/attention_guidance/ag_config/roberta_16/merges.txt
- __MACOSX/AttentionGuidance-main/attention_guidance/ag_config/roberta_16/._merges.txt
- AttentionGuidance-main/attention_guidance/ag_config/roberta_16/vocab.json
- __MACOSX/AttentionGuidance-main/attention_guidance/ag_config/roberta_16/._vocab.json
- AttentionGuidance-main/attention_guidance/examples/question-answering/run_squad.py
- __MACOSX/AttentionGuidance-main/attention_guidance/examples/question-answering/._run_squad.py
- AttentionGuidance-main/attention_guidance/examples/question-answering/README.md
- __MACOSX/AttentionGuidance-main/attention_guidance/examples/question-answering/._README.md
- AttentionGuidance-main/attention_guidance/examples/question-answering/run_tf_squad.py
- __MACOSX/AttentionGuidance-main/attention_guidance/examples/question-answering/._run_tf_squad.py
- AttentionGuidance-main/attention_guidance/examples/text-generation/run_generation.py
- __MACOSX/AttentionGuidance-main/attention_guidance/examples/text-generation/._run_generation.py
- AttentionGuidance-main/attention_guidance/examples/text-generation/README.md
- __MACOSX/AttentionGuidance-main/attention_guidance/examples/text-generation/._README.md
- AttentionGuidance-main/attention_guidance/examples/text-generation/pplm/
- __MACOSX/AttentionGuidance-main/attention_guidance/examples/text-generation/._pplm
- AttentionGuidance-main/attention_guidance/examples/adversarial/README.md
- __MACOSX/AttentionGuidance-main/attention_guidance/examples/adversarial/._README.md
- AttentionGuidance-main/attention_guidance/examples/adversarial/test_hans.py
- __MACOSX/AttentionGuidance-main/attention_guidance/examples/adversarial/._test_hans.py
- AttentionGuidance-main/attention_guidance/examples/adversarial/utils_hans.py
- __MACOSX/AttentionGuidance-main/attention_guidance/examples/adversarial/._utils_hans.py
- AttentionGuidance-main/attention_guidance/examples/translation/t5/
- __MACOSX/AttentionGuidance-main/attention_guidance/examples/translation/._t5
- AttentionGuidance-main/attention_guidance/examples/summarization/bertabs/
- __MACOSX/AttentionGuidance-main/attention_guidance/examples/summarization/._bertabs
- AttentionGuidance-main/attention_guidance/examples/summarization/finetune_t5.sh
- __MACOSX/AttentionGuidance-main/attention_guidance/examples/summarization/._finetune_t5.sh
- AttentionGuidance-main/attention_guidance/examples/summarization/finetune_bart_tiny.sh
- __MACOSX/AttentionGuidance-main/attention_guidance/examples/summarization/._finetune_bart_tiny.sh
- AttentionGuidance-main/attention_guidance/examples/summarization/finetune_bart.sh
- __MACOSX/AttentionGuidance-main/attention_guidance/examples/summarization/._finetune_bart.sh
- AttentionGuidance-main/attention_guidance/examples/summarization/__init__.py
- __MACOSX/AttentionGuidance-main/attention_guidance/examples/summarization/.___init__.py
- AttentionGuidance-main/attention_guidance/examples/summarization/README.md
- __MACOSX/AttentionGuidance-main/attention_guidance/examples/summarization/._README.md
- AttentionGuidance-main/attention_guidance/examples/summarization/test_summarization_examples.py
- __MACOSX/AttentionGuidance-main/attention_guidance/examples/summarization/._test_summarization_examples.py
- AttentionGuidance-main/attention_guidance/examples/summarization/utils.py
- __MACOSX/AttentionGuidance-main/attention_guidance/examples/summarization/._utils.py
- AttentionGuidance-main/attention_guidance/examples/summarization/finetune.py
- __MACOSX/AttentionGuidance-main/attention_guidance/examples/summarization/._finetune.py
- AttentionGuidance-main/attention_guidance/examples/summarization/evaluate_cnn.py
- __MACOSX/AttentionGuidance-main/attention_guidance/examples/summarization/._evaluate_cnn.py
- AttentionGuidance-main/attention_guidance/examples/text-classification/run_pl.sh
- __MACOSX/AttentionGuidance-main/attention_guidance/examples/text-classification/._run_pl.sh
- AttentionGuidance-main/attention_guidance/examples/text-classification/run_pl_glue.py
- __MACOSX/AttentionGuidance-main/attention_guidance/examples/text-classification/._run_pl_glue.py
- AttentionGuidance-main/attention_guidance/examples/text-classification/run_glue.py
- __MACOSX/AttentionGuidance-main/attention_guidance/examples/text-classification/._run_glue.py
- AttentionGuidance-main/attention_guidance/examples/text-classification/README.md
- __MACOSX/AttentionGuidance-main/attention_guidance/examples/text-classification/._README.md
- AttentionGuidance-main/attention_guidance/examples/text-classification/run_tf_glue.py
- __MACOSX/AttentionGuidance-main/attention_guidance/examples/text-classification/._run_tf_glue.py
- AttentionGuidance-main/attention_guidance/examples/text-classification/run_xnli.py
- __MACOSX/AttentionGuidance-main/attention_guidance/examples/text-classification/._run_xnli.py
- AttentionGuidance-main/attention_guidance/examples/distillation/run_squad_w_distillation.py
- __MACOSX/AttentionGuidance-main/attention_guidance/examples/distillation/._run_squad_w_distillation.py
- AttentionGuidance-main/attention_guidance/examples/distillation/requirements.txt
- __MACOSX/AttentionGuidance-main/attention_guidance/examples/distillation/._requirements.txt
- AttentionGuidance-main/attention_guidance/examples/distillation/lm_seqs_dataset.py
- __MACOSX/AttentionGuidance-main/attention_guidance/examples/distillation/._lm_seqs_dataset.py
- AttentionGuidance-main/attention_guidance/examples/distillation/training_configs/
- __MACOSX/AttentionGuidance-main/attention_guidance/examples/distillation/._training_configs
- AttentionGuidance-main/attention_guidance/examples/distillation/grouped_batch_sampler.py
- __MACOSX/AttentionGuidance-main/attention_guidance/examples/distillation/._grouped_batch_sampler.py
- AttentionGuidance-main/attention_guidance/examples/distillation/README.md
- __MACOSX/AttentionGuidance-main/attention_guidance/examples/distillation/._README.md
- AttentionGuidance-main/attention_guidance/examples/distillation/distiller.py
- __MACOSX/AttentionGuidance-main/attention_guidance/examples/distillation/._distiller.py
- AttentionGuidance-main/attention_guidance/examples/distillation/utils.py
- __MACOSX/AttentionGuidance-main/attention_guidance/examples/distillation/._utils.py
- AttentionGuidance-main/attention_guidance/examples/distillation/scripts/
- __MACOSX/AttentionGuidance-main/attention_guidance/examples/distillation/._scripts
- AttentionGuidance-main/attention_guidance/examples/distillation/train.py
- __MACOSX/AttentionGuidance-main/attention_guidance/examples/distillation/._train.py
- AttentionGuidance-main/attention_guidance/examples/language-modeling/run_language_modeling.py
- __MACOSX/AttentionGuidance-main/attention_guidance/examples/language-modeling/._run_language_modeling.py
- AttentionGuidance-main/attention_guidance/examples/language-modeling/README.md
- __MACOSX/AttentionGuidance-main/attention_guidance/examples/language-modeling/._README.md
- AttentionGuidance-main/attention_guidance/examples/token-classification/run_ner.py
- __MACOSX/AttentionGuidance-main/attention_guidance/examples/token-classification/._run_ner.py
- AttentionGuidance-main/attention_guidance/examples/token-classification/run_pl.sh
- __MACOSX/AttentionGuidance-main/attention_guidance/examples/token-classification/._run_pl.sh
- AttentionGuidance-main/attention_guidance/examples/token-classification/utils_ner.py
- __MACOSX/AttentionGuidance-main/attention_guidance/examples/token-classification/._utils_ner.py
- AttentionGuidance-main/attention_guidance/examples/token-classification/run_tf_ner.py
- __MACOSX/AttentionGuidance-main/attention_guidance/examples/token-classification/._run_tf_ner.py
- AttentionGuidance-main/attention_guidance/examples/token-classification/run.sh
- __MACOSX/AttentionGuidance-main/attention_guidance/examples/token-classification/._run.sh
- AttentionGuidance-main/attention_guidance/examples/token-classification/README.md
- __MACOSX/AttentionGuidance-main/attention_guidance/examples/token-classification/._README.md
- AttentionGuidance-main/attention_guidance/examples/token-classification/scripts/
- __MACOSX/AttentionGuidance-main/attention_guidance/examples/token-classification/._scripts
- AttentionGuidance-main/attention_guidance/examples/token-classification/run_pl_ner.py
- __MACOSX/AttentionGuidance-main/attention_guidance/examples/token-classification/._run_pl_ner.py
[truncated: 506 more entries]
