# Supplementary material
Source: ML conference proceedings conference paper supplement (https://aclanthology.org/2020.findings-emnlp.419)
Supplement: OptionalSupplementaryMaterial [file 2020.findings-emnlp.419.OptionalSupplementaryMaterial.zip › AttentionGuidance-main/attention_guidance/ag_config/roberta_8/merges.txt]

#version: 0.2 - Trained by `huggingface/tokenizers`
Ġ t
h e
Ġ a
i n
Ġt he
e r
o n
r e
Ġ o
Ġ s
Ġ w
e d
n d
a t
i s
o r
e n
i t
a n
Ġ f
Ġ c
a r
Ġo f
Ġ in
e s
a l
Ġ b
a s
in g
Ġa nd
Ġ p
o u
i c
Ġt o
Ġ m
i on
Ġ h
Ġ d
l e
r o
Ġ T
Ġ S
i l
en t
Ġ A
Ġ C
Ġ re
s t
Ġ 1
o m
e l
a m
Ġ l
Ġ I
Ġt h
Ġw as
Ġ n
a d
o l
a c
Ġ M
Ġ e
e t
Ġ on
e c
u r
Ġ B
ĠT he
Ġf or
Ġ H
i d
i v
l y
Ġ "
Ġ g
Ġ is
Ġ he
i m
o t
i r
i g
at ion
u t
o w
u s
Ġ P
Ġa s
t er
Ġ 2
a y
â Ģ
it h
Ġs t
c h
Ġw ith
e m
v er
u n
Ġ R
Ġ D
Ġb e
Ġ1 9
Ġ (
Ġ F
c e
u l
Ġ L
a nd
c t
Ġb y
Ġw h
Ġ W
er s
Ġa l
Ġa t
Ġ G
Ġ N
t h
is t
Ġa n
a g
Ġth at
Ġ2 0
ro m
o s
he r
a in
' s
Ġc on
Ġ J
u m
a v
Ġ r
Ġ E
Ġ it
es t
r i
Ġh is
Ġf rom
o p
ĠI n
Ġ O
Ġc om
o d
Ġp ro
o c
i f
il l
l d
Ġ v
a b
a p
ar t
it y
re s
at e
i es
u d
b er
a k
al l
e w
ig h
o re
Ġd e
Ġo r
ar d
or t
Ġ y
u p
e ar
Ġ K
Ġa re
an t
ic h
Ġ U
es s
ou r
q u
at ed
er e
Ġs e
i p
i an
u b
Ġp l
s e
Ġc h
Ġe x
ĠH e
i a
iv e
g h
Ġw ere
g e
o v
on g
r ou
ĠS t
Ġ20 1
ec t
am e
el l
n t
Ġ le
m ent
ar y
as t
i al
Ġs h
u st
re d
Ġ k
Ġwh ich
Ġh ad
Ġhe r
Ġs p
Ġt r
ĠC h
ac k
igh t
o st
in e
Ġ âĢ
e p
or d
av e
s o
u c
Ġ20 0
is h
Ġn ot
t her
o k
Ġ Ċ
Ġ V
ĠI t
Ġcom p
ic al
âĢ Ļ
p p
or k
ion s
o g
Ġ un
u e
ou s
Ġw he
m er
c l
ir st
0 0
Ġal so
ou ld
Ġh as
t e
u re
r a
om e
i e
Ġc l
ag e
f f
id e
he d
f ter
Ġf irst
Ġ us
Ġb ut
as s
Ġa r
ow n
r y
i re
ig n
i z
Ġre s
Ġthe ir
ou t
ic e
an s
er v
Ġ1 8
ou nd
Ġ j
Ġcon t
on d
u nd
p er
t o
w o
ĠT h
Ġh ave
Ġwh o
Ġa b
r it
at er
Ġon e
Ġit s
em ber
r ic
Ġa d
ĠU n
Ġp art
Ġs he
" ,
im e
ou nt
an g
ac t
a re
âĢ Ŀ
ĠâĢ ľ
Ġth is
al ly
ac h
ac e
l ow
re e
it ion
p l
m an
Ġt e
ul t
Ġa g
Ġa pp
k e
Ġy ear
r u
p ort
en ce
cl ud
) ,
en s
Ġa c
ation s
w n
o ver
i b
Ġpl ay
Ġm an
p t
Ġ up
Ġo ut
Ġbe en
ĠA l
Ġ 3
or n
Ġb ec
le ct
Ġt wo
l and
Ġ Y
Ġp er
Ġ ro
f er
ation al
i le
ad e
on e
ar k
a il
am p
Ġo ther
Ġh im
Ġy ou
" .
Ġin clud
Ġre c
in d
o ol
Ġo ver
n g
Ġ en
Ġthe y
ol d
il d
an ce
or y
Ġs c
o in
Ġm e
Ġw ork
ur ing
) .
ou gh
ter n
at es
el y
a w
Ġk n
e nd
T he
Ġal l
f or
Ġa fter
i ed
as ed
Ġd is
Ġin to
u g
Ġ im
u ch
ub l
Ġn e
Ġ19 9
t ed
ĠA r
ent s
it e
it ed
Ġcom m
w e
ab le
o od
Ġof f
an c
or s
ĠO n
t s
res s
o ok
ur n
ĠA s
Ġe v
Ġd es
âĢ ĵ
is s
Ġw ould
ch ool
on s
Ġt ime
o y
w ard
Ġp r
ak e
at h
Ġw e
as e
Ġn ew
h ip
Ġ und
os e
rou gh
ing s
ĠS he
Ġc an
l es
ĠM ar
w ay
iv ers
Ġwhe n
v el
Ġp re
g an
o b
Ġ 4
Ġl oc
Ġs erv
ct ion
Ġm ore
Ġund er
ic k
Ġs o
Ġs ec
ĠL e
Ġd o
i ous
f t
in al
h n
Ġag ain
Ġb et
e y
ĠN ew
Ġfor m
ot h
Ġc ol
Ġthe m
il y
rou nd
re n
ĠC om
Ġ19 8
i o
an k
is hed
Ġb u
mer ic
il m
Ġwhe re
Ġcon s
ou th
or ld
Ġon ly
Ġab out
Ġ qu
Ġthe re
as on
p e
Ġre g
Ġg r
ol low
c ess
Ġa ct
ri b
Ġyear s
. "
en c
Ġ 5
Ġf e
d u
f ore
in ce
a us
we en
re at
Ġthe n
a id
u al
Ġre t
or th
Ġth rough
er ed
a h
ĠTh is
r al
for m
r am
Ġst ud
ĠA meric
Ġm ost
l l
Ġp ubl
Ġin d
Ġe ar
Ġs up
Ġp e
Ġat t
r on
Ġf ound
t on
Ġs ome
Ġm ade
ou n
Ġ19 7
Ġte am
Ġd uring
Ġf am
a u
en er
Ġin ter
Ġd ec
id ent
i ke
Ġre m
Ġc ent
i x
ul ar
Ġas s
Ġs ub
ou se
Ġbet ween
ĠR e
oc k
a ir
ver y
v e
Ġre l
Ġm ov
1 9
Ġth ree
is ion
Ġre le
Ġf ilm
Ġ 6
Â ł
ic s
Ġp ol
Ġf ollow
p r
d uc
at ing
ic t
ol og
Ġth an
ĠS h
e ver
ivers ity
Ġsp ec
a z
an n
Ġc o
he s
Ġm y
an y
he n
Ġus ed
. âĢĿ
i el
Ġg o
p en
Ġe nd
Ġl ater
Ġb ack
Ġs uch
at ive
em ent
Ġs y
rou p
i k
l ed
a j
it ies
al s
Ġn um
iv ed
Ġa m
Ġp res
over n
Ġ19 6
Ġb l
t en
Ġsec ond
in n
Ġp op
Ġd ist
if e
o ot
t le
ot her
Ġc all
Ġ ent
Ġbe fore
Ġw ell
Ġf l
Ġkn own
ĠC ol
Ġbec ame
Ġe lect
ter s
op le
ĠI nd
at her
am es
Ġin c
p h
j ect
i et
Ġbe ing
c c
Ġs chool
if ic
ĠJ o
ro s
s on
i er
Ġin v
Ġn o
er m
el f
Ġpro v
ĠUn ited
ar g
Ġde f
Ġm us
Ġse ason
ire ct
Ġs m
Ġ Z
ĠA n
em b
Ġd id
Ġs et
al e
ĠA t
b all
t ing
Ġp os
vel op
ĠUn iversity
Ġb r
ur y
Ġf our
Ġw ill
Ġagain st
as h
t il
Ġman y
in es
Ġtr ans
Ġc ould
e b
ar s
Ġan y
Ġ19 4
Ġs er
Ġ 7
t ain
Ġwh ile
Ġac c
Ġrec ord
Ġs ur
o ber
Ġm ay
Ġo wn
t y
b um
ĠF r
iv er
ĠAmeric an
Ġinclud ing
d er
Ġs aid
ay s
Ġb ro
ar ri
ĠP ro
ĠA fter
oun c
Ġex p
Ġ ed
ĠC on
le y
h y
ow ever
is e
ep t
Ġar t
Ġle ad
Ġad d
Ġun til
ĠS c
it s
ĠE ng
Ġc ount
ĠC l
ion al
Ġpe ople
er n
in k
i red
Ġ1 7
Ã ©
Ġsh ow
Ġb oth
u res
iel d
Ġs ing
en n
ĠF or
un e
ist s
Ġ19 5
Ġal bum
Ġe m
e k
ro w
a red
ow er
i am
Ġin st
Ġf in
in a
i ew
Ġs ign
Ġre p
ric t
aus e
Ġ 8
Ġh igh
in s
f ul
Ġg roup
iz ed
Ġfam ily
Ġst art
Ġm ain
00 0
Ġre ce
e x
Ġw rit
Ġn ame
ĠM ay
ĠS p
ur ch
Ġ est
st em
Ġc ap
ĠI s
Ġl ong
Ġde velop
Ġm ed
ag ue
v en
Ġhe ad
Ġd if
u ally
Ġse ver
am ed
ver s
Ġm et
Ġnum ber
is m
ĠH is
Ġo per
Ġc re
ul l
Ġo pen
Ġm od
ĠThe y
Ġm in
Ġ 9
ĠCom m
Ġm on
ur al
Ġd irect
v ed
overn ment
Ġ1 0
ĠB r
Ġor ig
ak ing
Ġplay ed
ĠJ an
ĠW h
r ap
Ġbu ild
te nd
Ġrele ased
ĠSt ates
Ġare a
er man
s h
Ġm at
ĠJo hn
ĠâĢ ĵ
Ġl ike
Ġ Q
Ġw on
an ge
ul ation
Ġcall ed
us s
ain ed
Ġch ar
Ġs ong
Ġr un
Ġs ame
ros s
ĠW orld
Ġb el
ir d
Ġ1 6
Ġcomp le
p ed
iv es
Ġ1 5
Ġo b
ut ion
ĠD e
ar l
im es
os ed
Ġg ener
a x
in c
ĠA ust
ĠJ u
ant s
is ter
ĠN ational
ers on
Ġcont in
Ġpro g
Ġser ies
Ġret urn
Ġoff ic
Ġan n
Ġj ust
Ġsever al
Ġdes ign
Ġ19 3
Ġthe se
ĠT r
Ġd own
ar m
ĠThe re
Ġh ist
Ġs uc
ar n
Ġde p
Ġwh at
our n
ĠB rit
u ro
Ġv ar
el s
Ġg u
Ġc ur
Ġin t
Ġ if
Ġa round
Ġn ow
Ġim p
iv ing
Ġsy stem
ĠC ount
Ġfe at
Ġcon st
ĠA d
ib le
ut h
is ed
ug ust
u ary
m y
Ġc ity
Ġh and
ĠB l
u es
Ġbe gan
Ġus e
ain s
ce pt
Ġn ear
ĠP r
Ġch ild
t he
ial ly
Ġear ly
x t
Ġto ok
et s
Ġmus ic
Ġg ame
b y
2 0
aj or
Ġfollow ing
id ed
ĠN ov
Ġpubl ic
Ġst ate
ept ember
en g
ĠS chool
Ġpro du
ov e
Ġd r
Ġs ince
ut e
ĠA ugust
Ġa ir
u ed
re nt
Ġto wn
a i
iss ion
ĠD ec
il t
it al
Ġin s
en e
ĠS outh
Ġsm all
Ġres p
oc i
p or
i ent
Ġdis c
f ess
duc ed
ĠS eptember
Ġp h
v ent
ĠC an
u red
om an
ab l
Ġe ach
al k
b r
ĠMar ch
Ġor gan
ĠJ une
ĠG erman
Ġpl ace
ct ober
i or
ĠW ar
au gh
Ġp ass
il ity
ĠB e
Ġb ook
ru ct
Ġh ouse
Ġst r
Ġal ong
Ġfor mer
ĠO r
ical ly
Ġl and
av ing
ĠJan uary
ac ed
Ġ1 2
ĠJu ly
Ġc are
c es
Ġe ff
Ġp oin
ic ip
ĠP h
om et
Ġp rom
pr il
ĠY ork
Ġj oin
Ġhe ld
tern ational
i um
ĠAl l
ĠO ctober
re t
. .
Ġr ight
Ġth ough
Ġdif fer
om en
an e
oot ball
Ġs im
Ġhe l
Ġh ome
Ġcomm un
le ge
Ġin f
Ġsup port
ĠG r
ĠA pril
o ard
Ġg overnment
r ist
c on
ĠC ent
Ġcl ass
Ġloc ated
ment s
Ġo cc
Ġw orld
amp ions
al es
ĠP l
Ġ '
uc k
Ġprog ram
ĠE uro
Ġv ill
Ġb and
o x
Ġo ld
Ġl ast
ag es
Ġle ft
ĠNov ember
Ġres ult
Ġpop ulation
Ġcomp et
p le
olog y
emb ers
Ġbec ause
ĠDec ember
r act
b le
Ġ -
c k
res ent
1 8
Ġst ill
Ġt it
ro p
a f
ĠA nd
ĠS e
ar ge
ĠCount y
Ġl ook
or m
ĠN orth
Ġn amed
at ely
Ġs l
ĠG e
ward s
ic es
ĠH owever
Ġd ay
Ġm ajor
Ġsuc cess
er y
Ġc our
Ġ $
ain ing
Ġcomp any
Ġev en
os s
Ġloc al
Ġcl ub
Ġl it
ĠAust ral
Ġa ge
g et
Ġb us
le v
a e
Ġdes c
Ġ201 0
Ġl ife
s elf
ĠM us
Ġre st
ĠBrit ish
l ing
Ġapp ear
m in
ent ly
ĠAs s
Ġm ember
Ġpol it
ore d
ect ion
n e
Ġc ar
Ġest abl
m ed
Ġe very
Ġrece ived
m p
iv al
Ġ1 1
Ġserv ed
eb ru
ĠC ity
i ence
ebru ary
ill ion
Ġre f
Ġ1 4
in ess
Ġt urn
t al
Ġkn ow
Ġst ation
Ġm embers
ĠEuro pe
th ough
Ġex t
Ġf inal
ec hn
Ġl ine
Ġc r
Ġt ri
Ġev ent
ĠH er
Ġ1 3
on y
Ġm ake
Ġg et
od y
Ġ19 2
b orn
Ġb orn
h am
ĠF ebruary
Ġen g
' t
Ġ very
Ġsing le
un g
v iew
he st
at s
Ġw ay
ear ch
Ġt erm
Ġl ist
y l
le t
Ġbu ilt
er g
Ġcon c
ar r
ian s
Ġapp ro
ĠA m
at or
Ġ201 1
id es
il it
re w
ĠP ol
Ġd et
ampions hip
re en
Ġre port
Ġchar ac
Ġwith in
? âĢĿ
arri ed
ord ing
ĠW ill
Ġre fer
Ġth ose
ot t
Ġl arge
is on
ĠU S
Ġs ix
Ġb ased
Ġm uch
Ġan other
Ġcont ro
Ġne ed
is c
Ġinclud e
ad y
Ġt y
al ity
Ġm ark
Ġs oc
u ff
Ġn orth
ĠG u
Ġ201 2
ect ed
if ied
ri end
iv en
Ġf ive
Ġl aw
c hed
ĠK ing
a im
c om
iet y
Ġcon f
in ed
Ġp erson
Ġcons id
ĠB ro
ĠLe ague
ĠSt ate
ĠD uring
Ġ( "
Ġde ath
as ter
Ġst and
qu e
og rap
ĠE d
at ic
Ġre qu
m e
Ġc amp
Ġpres ent
d ay
Ġal low
it ions
ĠC o
Ġcent ury
ĠCan ad
ak es
Ġbuild ing
Ġc ame
s p
ĠCh rist
Ġto p
Ġd ue
ĠC al
Ġn ational
ĠI I
Ġspec ies
er t
Ġ201 4
iv ely
Ġpro fess
iv ision
, âĢĿ
ĠW hen
ĠA f
Ġvill age
Ġ201 3
Ġdiffer ent
i od
Ġcur rent
Ġpubl ished
Ġd ied
Ġs ide
on t
Ġ200 9
Ġw ater
Ġde b
Ġb re
Ġ200 8
Ġle g
n ess
il le
al y
ĠW est
Ġsh ort
Ġad v
Ġ19 1
ĠR ep
ie f
Ġmov ed
as k
Ġ .
at ure
ren ch
Ġdesc rib
Ġinclud ed
Ġl arg
ubl ic
o or
ĠM an
Ġd em
al th
v ious
Ġpro t
Ġre pl
Ġs outh
er ing
Ġ vers
re et
Ġth ird
Ġv al
od e
Ġw ant
Ġc over
Ġ201 5
Ġrep resent
h ing
Ġp ower
Ġm en
Ġman ag
ĠC ar
Ġchild ren
Ġf ootball
l ish
Ġb est
ur g
s ide
id d
al f
Ġw ent
Ġv is
Ġo pp
Ġt ake
ĠM in
Ġa v
om in
Ġf ew
n er
Ġ &
Ġs k
ec h
iz e
g r
ac es
ĠM c
a ff
Ġf ather
Ġ el
ord s
Ġar r
Ġs on
inn ing
Ġinc re
Ġ201 6
Ġ200 6
es tern
Ġg l
Ġp ost
Ġh um
ul a
uth or
ĠA b
Ġ200 7
ĠGe or
âĢ Ķ
enc y
iz ation
y ing
ĠD ist
Ġc or
ĠE l
ĠS w
st it
ĠW e
Ġex per
Ġp ar
ard s
id ge
Ġstart ed
Ġper form
tend ed
Ġl ed
ĠF rench
ĠE x
Ġtr ad
enc es
y n
ĠEng lish
w ork
Ġper iod
Ġk ill
Ġbe g
Ġsh ould
Ġof ten
Ġadd ition
o ad
Ġe p
ounc il
es e
Ġpos s
ed er
ap an
ang u
Ġy our
Ġis s
Ġim port
Ġ2 5
Ġex pl
Ġne xt
m s
Ġs w
Ġl a
ĠRe g
Ġse e
s c
Ġs it
ap p
Ġcare er
ĠB y
Ġp at
Ġle vel
ĠF l
et er
Ġb at
Ġbe h
ĠH igh
Ġas k
Ġf act
ĠCol lege
Ġ19 0
Ġpro ject
Ġmon th
Ġe qu
Ġc rit
Ġann ounc
ĠB ar
Ġsp e
v es
p ar
ond on
Ġorig inal
Ġed uc
Ġl ate
Ġam ong
Ġt w
Ġ201 7
c hes
ĠP art
Ġf ore
p s
e e
Ġw omen
Ġatt ack
ĠY ou
Ġ es
ĠP ar
Ġs old
Ã ¡
Ġg ood
ra ft
Ġor der
Ġyou ng
ron t
Ġh ow
an a
art ment
ac hed
ur s
Ġs omet
" )
Ġcount ry
Ġserv ice
Ġbus iness
ĠWill iam
ĠP ark
Ġa way
Ġn on
Ġsh ip
ing ton
Ġw ar
Ġ3 0
ĠR uss
ĠP res
ĠJ apan
Ġp ort
ĠL ondon
Ġwe ek
Ġf ind
Ġw in
at a
Ġne ver
ad u
ĠS y
ĠAf ric
f ord
ĠA ir
Ġapp e
Ġ <
Ġ X
, "
um b
rib ut
ĠS ec
ĠR iver
ad em
Ġcol lect
ĠW ith
l u
em pt
Ġa ff
um ent
ĠOn e
os p
Ġch ang
ĠDist rict
al d
le g
Ġbec ome
ilit ary
Ġm illion
ĠCom p
Ġre al
l ine
Ġpre vious
Ġtit le
y le
Ġg reat
Ġf riend
Ġinv ol
as es
Ġ201 8
Ġh aving
Ġe y
il ar
Ġf ac
Ġp ain
1 0
ĠT e
Ġg iven
ri es
ap e
Ġg ames
in o
pl oy
he l
Ġtr ack
z e
Ġestabl ished
ist r
Ġs ol
ru ction
Ġ18 9
Ġdist rict
Ġro le
on es
Ġhist ory
Ġm ag
c ed
ĠA cc
n a
he m
u k
ur ther
en se
Ġd el
Ġcharac ter
a ul
Ġr ad
ent ion
e ad
ar a
Ġf ield
o f
Ġt echn
Ġcomm on
m it
Ġeff ect
Ġwith out
ĠD av
ĠC or
ĠA ng
l er
um mer
Ġf re
ep end
ak en
Ġwork ed
Ġa ward
b e
Ġa uthor
Ġhel p
o le
ĠM ed
o on
ĠS oc
Ġvar ious
lev ision
h at
Ġreturn ed
Ġorig in
Ġ2 4
r an
Ġd on
Ġin it
ĠThe se
Ġpro cess
re g
e v
Ġto tal
Ġle t
av y
con om
ro te
ĠH ar
Ġst at
re st
Ġv ot
ĠD r
or ies
Ġannounc ed
Ġm arried
et h
ric k
Ġpro p
anc es
Ġspec ial
Ġus ing
Ġact iv
Ġs ent
Ġcommun ity
Ġcl aim
Ġstud ents
ĠEng land
Ġjoin ed
Ġf un
ĠH ouse
oci ation
Ġf em
Ġh owever
l in
c ent
ĠB ut
Ġapp oin
Ġr ound
ener al
iv id
Ġar ch
Ġc ult
Ġt imes
ec ut
ĠCh ampionship
Ġplay er
Ġcontin ued
ir l
am ent
er r
du ct
ab ly
Ġpro duced
Ġprom ot
ir c
ĠC up
i ber
ĠPh il
Ġcre ated
l ess
get her
Ġto gether
Ġ ,
Ġl ight
Ġf ull
Ġdo es
Ġg en
ab or
is ing
Ġdeb ut
Ġ200 5
Ġdef e
her n
Ġdevelop ment
Ġhist or
re am
Ġl angu
Ġb ody
ĠN o
ĠS an
ra w
el t
Ġh old
s k
n ing
are nt
Ġpos ition
l ic
ĠD ep
ĠIn ternational
c ast
Ġgener al
ĠE n
h old
Ġ18 8
op s
Ġd ays
Ġopen ed
ĠS up
est ed
ug g
Ġt em
Ġdescrib ed
ĠM e
Ġbro ther
Ġpop ular
ĠE ast
Ġh alf
Ġ2 1
Ġh ig
ĠR es
Ġwrit ten
Ġpart ic
Ġhim self
way s
d e
ĠInd ian
om b
ĠG l
as tern
Ġc le
ot s
Ġw rote
for man
am b
us ed
ĠF rom
ur b
Ġs ay
ort hern
Ġl ost
at ch
Ġin form
it her
Ġpr im
o ff
ol l
our s
land s
Ġh ost
oy al
og n
Ġcontro l
se qu
Ġpr act
Ġ200 0
m ost
= "
c o
Ġp ut
ĠAcc ording
min istr
st er
ĠR ec
Ġpolit ical
Ġro ad
Ġatt empt
ru g
Ġsim ilar
Ġbel ie
Ġs qu
Ġth ink
and er
al t
ou ther
ri pt
iv il
Ġa ver
est s
Ġst ory
5 0
Ġme et
Ġto o
ĠCh urch
Ġpoin t
Ġro om
amp le
Ġimport ant
e ep
Ġch urch
Ġs ite
outher n
t i
op e
Ã ³
ir on
ĠS er
Ġr ail
ĠPres ident
Ġint ro
Ġp ri
Ġprodu ction
ivid ual
Ġgo ing
Ġl im
ĠM ich
ĠA g
augh ter
Ġ200 4
Ġ1 00
Ġ18 6
Ġwork s
Ġac ross
Ġep is
Ġmat ch
hy s
ĠA c
Ġappe ared
ort s
Ġm aking
ĠL a
ĠE m
Ġcom b
Ġ2 2
Ġl ess
it or
er tain
Ġof fer
Ġvers ion
Ġm other
Ġconsid ered
n ow
Ġreg ion
Ġg row
ĠR oman
Ġm ilitary
Ġpart icip
ĠInd ia
le x
Ġpro per
ell ow
Ġoffic ial
Ġv iew
Ġcon n
ĠAustral ia
ag ed
Ġn ight
S t
Ġv ide
ac y
Ġf urther
ĠM on
Ġm ust
et work
Ġelect ion
ad es
in ation
ĠSt reet
Ġ 0
ĠP e
Ġte levision
o ice
im ent
Ġg round
1 7
ĠC ouncil
Ġg ave
Ġd est
if orn
Ġbro ad
un icip
Ġind ust
ĠP er
Ġother s
ĠRep ublic
ĠAr my
Ġl ow
ĠEurope an
Ġ [
Ġw ife
Ġper forman
re m
Ġeng ine
Ġb as
Ġ2 3
Ġ ident
ree k
ĠFr ance
Ġwork ing
Ġsur v
e um
h a
Ġc aus
Ġpart y
Ġfound ed
ĠAr t
ĠS m
Ġv ol
u it
h ic
Ġin ternational
iforn ia
ĠA ct
Ġind ividual
2 00
Ġ ide
he re
i us
Ġpr iv
ke y
Ġon ce
il es
it ing
ĠS ch
id ing
Ġlit tle
Ġrecord ed
Ġpartic ular
ĠD es
oc r
t ion
Ġ18 7
u el
Ġdid n
Ġhe re
n ey
1 2
ĠCal ifornia
ĠPart y
Ġinv est
h ib
Ġp o
Ġinf lu
b or
at t
Ġm ult
ap er
Ġbl ack
Ġsoc ial
Ġthough t
ish ing
Ġres earch
ĠG eneral
ic a
Ġf ront
Ġs ound
y ear
ic o
Ġe ast
ĠWh ile
f ield
Ġro ck
ĠAmeric a
Ġoff ice
ĠN or
Ġc ase
Ġprofess ional
Ġform ed
Ġm id
ĠCh ar
ĠC our
Ġs aw
Ġf ire
Ġre ad
in t
Ġe conom
Ġhum an
ĠJ ames
Ġt en
e f
it te
am a
one y
ill s
d om
ol ution
id ence
er a
r ing
im ately
ĠD ivision
ell s
Ġex ist
idd le
olog ical
ate g
Ġl iving
Ġsign ed
ĠH ol
Ġf und
us h
Ġare as
Ġl ive
ĠQ ue
Ġgr adu
Ġf ail
Ġtrad ition
v ille
ĠP ort
Ġex ample
Ġw est
Ġse en
av es
Ġav ail
Ġ2 6
Ġelect ed
Ġst ruct
ĠV al
ĠCanad a
Ġdevelop ed
Ġre n
Ġh on
Ġappoin ted
Ġaver age
Ġf ree
Ġh ous
Ġtr av
Ã Ń
.. .
Ġse lect
Ġ2 8
a ign
Ġt our
ĠTh om
Ġty p
Ġstr ong
1 6
m a
1 5
Ġcon d
Ġrele ase
ĠB at
ĠS ome
Ġe le
ers hip
Ġv ict
ĠGeor ge
Ġcol l
ĠM or
Ã ¼
s hip
Ġfollow ed
B C
Ġm ot
Ġd iv
Ġ2 7
Ġcom e
Ġal though
Ġreport ed
Ġem ploy
Ġt aken
b s
Ġpres ident
Ġey es
Ġa ut
ens us
ĠB el
fer ence
w h
i ol
Ġprodu ct
Ġm ar
Ġ200 3
Ġplay ing
Ġn ov
Ġrec ogn
Ġform ula
g ed
p ite
an ish
Ġde g
a el
ĠR ober
Ġ199 0
Ġf ace
ip p
and ed
Ġteam s
Ġf oc
Ġrel ations
u le
Ġf all
Ġask ed
Ġm ater
Ġre view
ly mp
Ġr a
ĠAss ociation
Ġcont ract
Ġe ight
ro wn
ĠP al
st and
Ġbeh ind
Ġg ot
Ġsuccess ful
g er
Ġo ur
ĠM y
th ing
ĠR ich
Ġor d
ĠL ou
ress ed
a ut
Ġc ross
it ive
Ġre d
ĠQ u
Ġc ast
Ġpoin ts
an ia
Ġpro duc
Ġab le
Ġw ind
Ġsign ific
ain t
ough t
Ġde v
ĠO lymp
l i
ĠR oyal
ud d
Ġc e
Ġst op
Ġr ace
ĠT o
ib r
Ġmod ern
Ġh y
Ġd aughter
Ġmonth s
Ġs uff
ĠUn ion
Ġfin ished
Ġev ents
ou te
Ġh ard
ell ing
ar i
Ġavail able
Ġvide o
Ġla un
Ġse par
Ġr ank
ĠA nt
Ġf ight
Ġserv ices
ĠM al
ce ed
ag o
Ġcl ose
ĠGerman y
Ġind epend
Ġco ach
il i
r is
stit ute
Ġp ast
m ing
et t
u f
Ġc ost
ol ic
ens ive
e al
Ġpl an
Ġdirect or
ourn al
Ġ200 2
ĠH all
Ġpro ble
Ġme an
st r
at ors
ap s
ĠD em
Ġre v
Ġbec om
ĠâĢ ĺ
ut es
i ec
Ġ200 1
ĠP aul
T h
it ect
Ġag re
Ġeduc ation
Ġ198 0
Ġv e
ĠA ward
itte e
C h
ĠAustral ian
ĠP at
ĠR oad
wo od
est ival
ĠS en
em ents
Ġrem ained
nd er
ĠDav id
Ġ201 9
Ġad ministr
Ġen c
Ġr ul
Ġlangu age
Ġb ase
Ġd am
3 0
Ġent ire
t t
Ġcl os
he ad
ro y
Ġst yle
Ġs il
i j
Ġass ist
ign ed
ist ic
Ġf ar
Ġe ver
her s
ĠJ ack
ĠR ed
1 4
Ġle ast
Ġre ached
Ġk eep
Ġperform ed
ĠN e
arl iam
h an
air s
Ġb o
Ġc ou
Ġcurrent ly
ch ie
en ed
Ġcamp aign
pl ay
ĠAl though
Ġwh ite
Ġt re
Ġse em
Ġe ither
Ġc irc
Ġ2 9
ĠM ary
Ġhouse hold
ĠComp any
rough t
f ic
Ġreg ular
ber t
arliam ent
Ġmark et
Ġdisc over
Ġturn ed
ĠJ os
ĠH en
c le
Ġfeat ures
a ur
Ġp hys
ĠCour t
ent ial
. ,
Ġal most
k m
Y ou
w est
Ġimp ro
Ġs ugg
Ġsong s
il ies
Ġdesign ed
ific ation
Ġs our
Ġfe el
re ad
ĠN ot
Ġthrough out
Ġinform ation
Ġcomple ted
v al
Ġf low
Ġmater ial
at ural
ĠS am
op h
Ġm unicip
ĠFr anc
Ġle ague
k s
Ġh it
enc ed
Ġg irl
er ous
Ġup on
ĠO ff
ĠM o
ight s
an ch
ĠI f
Ġconst ruction
um p
Ġc he
ud e
Ġlarg est
Ã ¶
Ġp ress
Ġinclud es
ĠS ince
c raft
ĠB er
p ro
ĠP ri
is l
Ġac qu
h od
1 3
Ġse ven
ĠM ex
ar ter
Ġw alk
ecut ive
eder al
Ġadd ed
t ime
Ġd oc
ĠCent ral
Ġ197 0
ĠH ist
st on
Ġab ove
Ġd ou
ĠCh ina
i que
ac ing
Ġevent ually
Ġm ount
w are
ĠSt ud
re y
s el
Ġlead ing
osp ital
Ġan im
Ġorigin ally
Ġl ab
m en
Ġs at
ra z
Ġinvol ved
i ers
Ġsignific ant
Ġtr aining
Ġso on
Ġle arn
Ġfeat ured
as ing
adem y
ig r
Ġp ur
Ġplay ers
Ġp ark
Ġass oci
Ġstud y
Ġfor ces
il ities
ĠIs land
ash ington
ri an
Ġac cess
C A
Ġkill ed
ĠG od
ĠF irst
p ect
az ine
at ter
Ġdec ided
Ġ5 0
Ġb ank
re ady
ĠR ail
Ġb oard
ĠM art
ec k
ĠU K
Ġph ot
ĠM ag
y a
ourn ament
Ġrel ig
ĠA lex
if f
ĠDep artment
ĠBl ack
Ġw id
Ġ z
Ġcons ist
med i
o res
Ġm iss
Ġqu al
it z
ab ility
Ġ( )
ou l
ak er
Ġsit u
Ġw oman
Ġch ange
Ġf ig
Ġschool s
ĠSt e
c he
Ġresp ons
g es
Ġrad io
Ġqu est
b urg
and s
v iron
Ġdirect ed
Ġgroup s
Ġt est
eng th
p ly
ĠIt s
Ġsomet hing
erg y
ĠC ap
Ġb rought
Ġgo al
s y
Ġ199 9
as ons
Ġac cept
ĠCl ub
g in
ĠCent er
ĠM ount
Ġus ually
Ġepis ode
1 1
Ġl ove
ĠIt al
ĠT own
it ch
at ory
Ġf av
ĠS l
r ay
Ġn etwork
Ġpriv ate
ĠJ ew
Ġst ri
ĠV ir
ines e
ach ing
Ġlit er
t r
g o
ĠG roup
ĠW ashington
ress ion
ĠJ e
os ition
om m
ĠAng el
Ġinter est
Ġaward ed
Ġbet ter
ĠO ther
ĠB ay
ber g
Ġt er
Ġf r
Âł m
Ġperforman ce
Ġst age
Ġcon duct
Ġhe alth
ĠPro v
Ġprov ided
ok e
Ġsub sequ
Ġwant ed
Ġd i
ĠM ad
Ġrepl aced
ĠC ong
ar ies
ĠL aw
Ġal ready
Ġsub ject
Ġcour t
ĠTh at
Ġm em
ĠC ath
mer c
inc ip
Ġcount ries
Ġcap t
ĠD on
Ġt reat
ĠIn stitute
ĠS im
ict ion
ĠChrist ian
Ġpl aced
Ġout side
Ġst e
Ġr ather
Ġpl ant
Ġst re
b ack
id s
Ġst ated
Ġr ange
Ġresp ect
Ġl ik
ĠW estern
Ġc and
Ġto ld
Ġt ou
Ġc op
Ġdec l
ar ing
Ġw all
Ġin j
Ġp ay
Ġqu ick
Ġpol ice
Ġl o
Ġa ud
Ġa p
il ed
ar ian
Ġg un
id a
ĠThom as
h ood
Ġ ill
Ġmod el
Ġst ep
Ġm ight
ĠT ur
p ec
Ġtrans fer
s w
ĠM iss
Ġcol lege
Ġt aking
Ġde al
Ġst ates
Ġp arent
overn or
Ġval ue
Ġposs ible
ĠRober t
Ġen ough
Ġlook ed
Ġc ut
ic y
un k
b and
Ġa chie
Ġ199 8
an i
at ives
Ġcent ral
ĠSoc iety
b oard
ĠM r
Ġappro x
Ġg ive
Ġ196 0
Ġc ivil
Ġarch itect
er c
ĠT V
Ġocc ur
Ġar g
ic ated
ut ure
Ġc reat
n ed
Ġp ot
Ġinst ead
Ġc at
Ġf if
Ġcompet ition
Ġf elt
ar ily
ĠI r
Ġbook s
Ġnov el
ĠRuss ian
ĠCanad ian
Ġcon v
anc ed
ĠM ark
Ġ18 5
ĠChar les
I n
Ġl oss
ĠâĢ Ķ
Ġshow s
Ġconst it
Ġcent er
Ġs ize
Ġb ig
ĠT ex
ĠMin ister
Ġdeg ree
Ġdo or
ĠJapan ese
al a
ĠS erv
al ed
Ġ ver
Ġfour th
Ġal ways
ĠAfric an
f ace
Ġs em
ĠMus ic
ĠCh inese
r up
Ġt alk
Ġse x
Ġv iol
Ġto wards
ĠG reat
ĠL at
ĠComm un
Ġt ro
Ġcap ital
Ġ18 4
e g
Ġb ur
Ġsp ace
ĠSc ott
ĠAc ademy
Ġob s
viron ment
Ġcour se
Ġprov ide
Ġre b
ĠC am
ĠGr and
ĠLou is
augh t
ĠB o
is es
ct or
ĠItal ian
Ġw a
Ġb i
un t
Ġfor ce
at re
Ġchang ed
Ġ199 6
Ġes c
Ġre ve
ĠV ict
Ġb ar
Ġbre ak
b ed
Ġh om
Ġg old
od es
Ġar m
Ġfam ilies
id ae
ĠS k
ap t
Ġintro duced
ĠDem ocr
im ate
Ġr iver
ur ity
ĠS al
Ġob ject
ow s
ĠM ac
Ġ Ã
Ġm oney
en a
Ġ4 0
ann el
ol f
v ing
Ġ199 7
Ġty pe
pec ially
ĠS ing
erv e
ĠWh ite
Ġme as
Ġfem ale
ĠM et
ell ed
Ġm ass
Ġd raw
Ġcl osed
Ġf arm
Ġm ix
Ġcrit ic
Ġwh ose
Ġs en
Ġk ey
Ġair craft
Ġrelations hip
Ġart ic
ĠSp anish
i ation
19 9
ĠJ ust
Ġmov e
Ġ3 1
Ġp urch
Ġcomp an
y s
Ġw ood
Ġacc ount
um e
Ġj ud
Ġst ay
merc ial
Ġright s
ish op
Ġr an
Ġpart s
Ġsc ored
Ġcont ribut
Ġat tended
o o
Ġpl ann
ĠR ad
Ġc ertain
n ot
Ġits elf
Ġmet hod
Ġf ood
pl es
Ġb oy
ir m
ĠAfric a
l ier
or ing
m on
ov ed
av al
Ġne igh
ra el
ĠMich ael
ĠFr ank
Ġinst it
Ġpro b
h i
Ġocc up
l ike
u z
ĠG reen
Ġhand s
Ġm om
ĠE ar
ĠC ons
Ġsp ent
Ġallow ed
op tion
Ġbroad cast
ĠP enn
Ġb all
ut er
ĠG old
Ġp red
Ġd er
un n
sh ire
Ġc y
Ġh or
ĠT om
Ġcand id
ĠD an
r d
Ġo pt
g y
Ġc ensus
ec ess
ĠH am
ĠW il
ist ry
ro ad
m ar
ĠM ost
i qu
Ġn orthern
ord er
Ġpre m
Ġne g
Ġa ction
ĠL ake
Ġbeg inning
" ),
Ġfre qu
k a
Ġstud io
re land
ir th
Ġcomm and
Ġreg ard
ĠT wo
Ġ199 5
ep h
i res
Ġst ar
Ġgr and
Ġhe art
Ġd one
os ing
Ġconc ern
ĠHen ry
oun ter
as c
Ġend ed
Ġs ection
Ä ģ
Ġfilm s
Ġme ans
Ġd ata
Ġact ive
Ġk ing
Ġs us
Ġapprox imately
Ġt ax
Ġv ia
ov iet
Ġes pecially
Ġtrav el
Ġlist ed
Ġp ers
Ġdet erm
Ġde ep
Ġs outhern
ri a
Ġwrit ing
Ġ199 4
Ġv oice
Ġ199 2
Ġcle ar
ĠF ollow
Ġl ower
Ġbuild ings
ic ian
Ġex cept
ograp hy
uf act
ĠP et
Ġmov ement
ĠVir gin
Ġex c
Ġbel ow
Ġis land
ain e
Ġc al
ĠPar is
l im
ĠF ilm
Ġd ark
Ġw inning
Ġmain tain
m b
y r
Ġun its
Ġrun ning
on a
Ġs elf
ĠP eter
" >
ĠVict or
Ġd ivision
inn er
Ġrun s
o id
id ents
Ġprevious ly
c y
it es
ĠM ont
Ġdefe ated
< /
Ġdest roy
Ġl ength
ĠT or
Ġex hib
ĠKing dom
n own
Ġs ummer
Ġan c
Ġco ast
ed y
Ġch art
ĠFollow ing
ĠCath olic
ibr ary
Ġorgan ization
l am
Ġim m
Ġch ampionship
Ġbl ock
oin t
ĠH ill
ĠM at
Ġindust ry
om p
Ġwh om
Ġbat tle
ir t
he t
Ġf uture
Ġse at
ab it
emb ly
2 5
Ġs n
ol k
end ing
Ġmed ia
all ed
Ġn atural
ĠC amp
o ch
I I
ĠTex as
ar ch
? "
re l
ĠSm ith
ĠIs rael
Ġinvest ig
Ġown ed
Ġfoc us
Ġm ur
cl us
ist an
if t
y m
Ġsur round
ĠD irect
Ġs ch
ĠComm ission
Ġrepresent ed
ut y
Ġset t
Ġs af
Ġplay s
op er
ag on
Ġc red
in ent
u x
ens ion
ĠI m
ĠMus eum
ect or
Ġhig her
fic ult
du ction
Ġear lier
f it
Ġsomet imes
Ġpr incip
ĠF ootball
Ġt ournament
Ġrequ ired
ĠM el
Ġfun ction
ip s
ĠSec ond
Ġacc ording
Ġent ered
Ġh ot
Ġconst ruct
Ġdoc ument
Ġso ft
Ġn omin
Ġar my
b ased
ĠK ore
Ġmin utes
Ġperson al
Ġh us
ĠA pp
Ġl ived
ĠAr ch
ad a
ri al
Ġpr ison
Ġsystem s
Ġex am
ĠF in
ret ary
ĠD o
ĠS oviet
ĠRich ard
Ġw ord
Ġj ob
yl v
Âł km
Ġe as
Ġdif ficult
Ġp iec
Ġle ave
Ġ199 3
le br
Ġw ide
Ġk ind
ĠB en
ask et
Ġprim ary
ĠM any
Ġ199 1
Ġold er
an o
in i
Ġart ist
Ġcom mercial
Ġd ro
Ġpass ed
ort un
ĠD ay
Ġlead er
Ġnot ed
Ġstruct ure
ĠS o
g round
Ġtrans l
I t
Ġj ournal
Ġcomple x
ib ility
Ġim medi
Ġth ings
por ary
i ences
as ion
Ġte ac
ĠSw ed
Ġtradition al
ur t
ĠCh ic
Ġb ene
i os
it a
Ġproper ty
ĠComm ittee
ĠS ant
Ġgener ally
Ġopen ing
S A
um n
le ment
Ġ" "
Ġhig hest
Ġlong er
ro l
Ġh ours
ĠCar ol
Ġto day
he ast
ĠTr ans
ĠI reland
ĠG overnment
Ġkn ew
ĠY ear
ĠIn ter
Ġfin anc
Ġth us
Ġpl at
or por
ĠL os
Ġindepend ent
u ke
Ġstud ied
ĠRe v
ro ll
Ġfin ally
Ġab s
ĠB est
Ġ195 0
Ġstand ard
Ġin tern
ĠC r
ĠR ock
Ġman ufact
in ct
Ġw ords
Ġr oute
Ġmult ip
ĠK h
ĠZ eal
Ġsh ot
Ġd ate
Ġmag azine
ĠRec ords
Ġ Â
Ġ #
if y
ĠF ore
ly ing
Ġoper ations
Ġp ick
Ġstud ies
Ġl ack
Ġpract ice
or ial
Ġstud ent
Ġcount y
Ġins ide
l ant
Ġd en
ĠR ob
Ġcollect ion
Ġan aly
Ġrail way
p ing
ĠZeal and
er ry
Ġh ap
Ġset tle
ĠD el
ĠFl or
sy ch
Ġhus band
ĠCong ress
ot a
k nown
it ar
4 0
ĠB oard
ro om
Ġst aff
Ġan ti
Ġch air
Ġnum erous
ĠCon t
l a
Ġinc ome
Ġm ind
Ġth reat
N A
ĠF estival
Ġl ay
6 0
Ġd ram
Ġcont ains
Ġle aving
arri age
Ġbr ing
Ġra ised
Ġfor ced
w ell
end ed
Ġcompan ies
ad ium
Ġappear ance
Ġnew sp
ent y
Ġdis p
e es
Ġe mer
a ult
Ġrel ated
c her
" ).
Ġapp lic
Ġpur p
Ġlaun ched
Ġloc ation
erv ed
ĠG re
sel ves
ust om
ĠM a
Ġiss ues
g en
Ġre ally
ri ef
ĠC ast
ĠG reek
Ġcaus ed
iz ing
ĠB ur
Ġbecom ing
ut ch
Ġquick ly
on n
Ġl ink
Ġg e
Ġtrans port
ĠS ir
Ġter rit
ad o
Ġincre ased
Ġs low
Ġcomm ission
Ġper cent
Ġ198 9
Ġpri or
Ġcomple te
mit ted
z a
ĠB u
Ġthem selves
m ark
Ġy et
âĢ ¦
Ġdec ision
ĠP ac
Ġparent s
hest er
ĠPl ay
ĠN avy
ĠAngel es
Ġnew s
is k
ven ue
ĠE v
Ġfam ous
ĠE duc
Ġm ission
ĠFor ce
ĠAr ts
us e
Ġterm s
Ġse a
Ġv oc
ĠH ow
pp ed
ur a
et her
o e
Ġf le
ĠBro wn
Ġide a
ĠChic ago
ed s
Ġ er
Ġve hic
Ġen vironment
ul ated
Ġce lebr
Ġsc ient
Ġw estern
ĠL ater
ĠL ord
Ġn orm
Ġneed ed
Ġd ig
ĠIt aly
Ġs ister
Ġhap pen
Ġins p
Ġfore st
Ġtr ain
Ġdisc uss
Ġweek s
Ġsup er
Ġob tain
act ion
am s
ĠM il
um ents
it iz
ĠMex ico
Ġat tend
Ġ198 8
rib ution
Ġmeet ing
Ġsen ior
ĠSc ot
orn ing
Ġmajor ity
Ġvict ory
Ġcharac ters
Ġ ens
ol a
8 0
Ġsc ore
ĠF ound
Ġbl ood
ĠThe ir
ĠC arl
Ġhel ped
Ġselect ed
ĠL it
ylv ania
in ary
e en
d en
ig an
Ã ¢
ĠB et
Ġwho le
Ġgo als
ĠS aint
Ġassoci ated
Ġann ual
ĠG o
Ġt akes
Ġun it
Ġaddition al
Ġcre ate
ĠHist or
Ġmin or
ĠP arliament
re me
Ġconsid er
Ġb ox
l or
ill ed
T V
ail s
Ġsch ol
Ã ¤
Ġmus ical
Ġmost ly
b ers
Ġfeat ure
Ġp en
ank s
Ġgr ant
Ġmat ches
Ġoffer ed
b l
Ġcon cept
ĠAr ab
Ġde ad
Ġe t
Ġcent re
Ġequ ip
ĠO l
Ġm iddle
Ġam ount
il s
Ġmanag er
Ġen ergy
stand ing
ĠGeor g
s is
Ġm ention
Ġinter view
Ġfl oor
Ġsing er
Ġrem ains
Ġfriend s
Ġre ason
ograp h
in et
Ġret ired
Ġart ists
ĠSup er
Ġwrit er
r ight
os es
Ġ18 3
Ġactiv ities
asket ball
Ġprogram s
Ġtr ade
om a
Ġtri ed
l it
Ġev idence
ech an
w rit
Ġchang es
Ġlim ited
Ġp ul
Ġc anc
ĠR o
u ge
Ġt able
Ġparticular ly
ver t
Ġl ines
Ġt rib
Ġn ames
Ġbelie ved
A r
ĠM ass
and a
Ġleg al
ĠO ld
Ġrem ain
ĠE mp
ĠVirgin ia
Ġsh own
ic ation
id er
te en
Ġs um
ĠS qu
Ġsay ing
Ġd om
Ġte xt
or al
W hat
ing u
Ġmunicip ality
c ript
Ġatt ract
Ġb irth
Ġwas n
is ions
Ġc arried
ric ult
Ġgen us
F L
Ġlarg er
Ġiss ue
h ouse
Ġin n
Ġpre vent
er o
Ġ198 7
Ġvis it
Ġsupport ed
Ġan t
Ġeconom ic
Ġrelig ious
Ġinit ially
Ġoper ated
Ġsc ience
Ġquest ion
ĠL iber
ĠOlymp ics
Ġnear ly
Ġm akes
ĠAn n
Ġr ap
ch ange
Ġhe avy
Ġsqu ad
Ġsc reen
em s
Ġn ine
w ide
ĠM ill
ir it
Ġfail ed
on se
Ġclaim ed
Ġb ound
a res
Ġbel ong
s ylvania
Ġoffic er
Ġch ief
und red
ad d
Ġ198 6
Ġw at
d own
2 1
Ġqu arter
ou d
Ġcompet ed
ĠB raz
Ġserv ing
ron ic
Ġm ach
ĠU p
Ġd ed
Ġfe et
ĠS ummer
Ġc orn
ĠE r
ent h
i Ä
ĠW omen
ĠN orthern
W e
Ġresult s
Ġch all
ĠProv ince
ĠLe g
ĠW ales
Ġestabl ish
Ġexper ience
Ġfor ward
ĠIr ish
Ġmed ical
ĠPenn sylvania
Ġed ition
av en
Ġan g
ĠFlor ida
Ġ198 4
Ġcoll abor
Ġb rief
ail ed
Ġmanag ement
ĠB ill
Ġincre ase
ĠC he
ir ing
Ġad op
Ġr ate
Ġrefer red
ĠVal ley
Ġpo et
f ect
Ġun iversity
Ġsur face
Ġprob ably
ri ed
ĠSt r
ĠDes pite
ĠAt lant
Ġconn ect
Ġt ell
ac hes
2 4
Ġarr ived
ĠC D
Ġcom ing
ous ly
2 3
amp ion
ĠW ood
Ġs ays
Ġto w
Ġpresent ed
port s
ĠK n
Ġsubsequ ently
Ġm er
Ġinst r
Ġar rest
Ġcult ure
Ġp le
ĠF ort
ul f
st e
at ively
Ġfor t
Ġp oor
Ġear ned
Ġ198 5
Ġc ases
v a
i ents
ĠPro fess
Ġsp orts
ĠRuss ia
Ġgu itar
Ġb ad
t a
A meric
az z
ĠI ran
ĠCh ief
Ġmanag ed
ĠP re
Ġstart ing
erv ation
ĠBat tle
er em
Ġal tern
un ior
ĠO per
oc key
Ġrem aining
Ġmom ent
ĠBraz il
ian ce
inal s
ĠM ur
ĠO ver
Ġf oot
ĠJos eph
Ġus es
Ġar ms
Ġvar iety
Ġo p
Ġtro ops
ĠS ur
Ġsus p
k en
Ġed itor
Ġcomp osed
Ġspec ific
Ġt arg
i en
Ġform s
ĠO h
ic an
ĠH ot
Ġdem on
Ġindividual s
i y
od d
ĠEduc ation
ĠJ im
ĠC at
Ġl if
Ġstat us
Ġpol icy
F A
ĠT echn
Ġind ic
Ġf ederal
ĠCh ap
Ġmov ie
Ġfore ign
b ur
ĠU nder
Ġcar ry
ol s
Ġfinanc ial
ab b
Ġmean ing
ĠD en
ire ction
ell a
Ġcover ed
Ġn ation
Ġprov ides
Ġb ed
ĠCol umb
Ġin te
Ġc ustom
Ġtou ch
Ġcons ists
Ġph il
it ation
ĠChampionship s
led ge
Ġad j
ar ters
Ġc ell
ĠB oth
Ġsepar ate
Ġe astern
et te
Ġh ospital
Ġs le
Ġproble ms
A l
Ġatt ention
7 0
A n
g ing
Ġappear s
Ġn ecess
ear s
is ation
ĠS ar
ĠS outhern
b on
Ġs ure
Ġl ives
a o
Ġcre w
Ġm ale
Ġplat form
in ter
Ġmed al
p art
ut ions
Ġrec ent
i ant
ĠM ore
ĠPac ific
Ġany thing
im um
Ġlab el
ĠP ublic
it ude
l ight
ĠG ames
2 2
Ġl og
Ġse asons
u a
t ies
u ing
ĠR os
Ġrequ ire
Ġresp onse
Ġhous es
Ġ198 3
Ġhe ard
Ġsome one
Ġthe ory
Ġm arriage
Ġover all
Ġsour ce
ĠMart in
Ġsoc iety
B A
Ġcomp os
ĠB us
Ġtem per
Ġal one
Ġbr idge
ĠSp ain
ĠServ ice
Ġcol on
Ġse qu
Ġmain ly
ĠH aw
ĠB ank
ill a
Ġreg ional
Ġst ations
isc o
ot e
Ġl atter
ag ing
Ġarr ang
Ġp aper
Ġc ouncil
ĠCl ass
Ġp il
Ġ198 2
ail y
Ġtr ying
m ond
Ġsh oot
p ut
Ġnear by
c er
Ġdep art
Ġc ause
Ġl ot
Ġleg isl
r ast
ĠS un
Ġrecord ing
Ġl ic
Ġk ept
Ġdes pite
Ġacqu ired
Ġ6 5
Ġwhe ther
Ġest im
urb an
ĠM ic
Ġwh y
Ġch arg
ĠThe n
Ġf irm
Ġsqu are
Ġsuc ceed
Ġpl ans
ob al
Ġdirect ly
b ury
ust r
Ġb omb
et ic
k y
ĠS il
ĠQue en
ĠAn other
Ġtrack s
ĠW ork
Ġnot hing
ĠJew ish
uc le
ess ion
ard en
g l
Ġch ap
Ġ193 0
ĠL uc
at o
Ġmov ing
Ġrespons ible
Ġprop osed
Ġ194 0
um ed
Ġgradu ated
in ing
Ġinflu ence
c a
Ġh op
ĠAss embly
Ġlook ing
Ġsp read
Ġtechn ology
Ġp ath
ĠO ut
Ġdis s
Ġlik ely
ar io
Ġ6 0
im b
Ġpart n
ĠB oy
Ġdep artment
m ore
Ġn ative
Ġship s
ĠL and
Ġprot ect
Ġw or
ĠBrit ain
ig er
Ġ197 2
Ġ197 9
ĠA wards
ip l
ĠF red
Ġdiscover ed
Ġh air
Ġn ature
b an
ur ies
ian a
um an
Ġmultip le
ĠMc C
Ġserv e
Ġg rew
Ġwe bs
Ġc itiz
Ġact ually
ĠB ook
Ġdo ing
Ġan sw
vent ion
ab les
Ġimmedi ately
ĠDirect or
Ġf ell
it t
Ġ194 5
st ant
ens ity
ĠPol and
ĠT imes
Ġ =
m ission
ĠP ak
19 8
b re
ĠM od
ul ly
ĠS ub
Ġcom ment
Ġoper ation
ĠT w
im in
lect ion
ĠSc ience
Ġproble m
Ġd u
Ġh all
Ġvot e
Ġpe ak
Ġwe ap
Ġ i
k r
ĠS pr
Ġsh are
Ġincre asing
Ġc ateg
Ġac adem
Ġspe ed
ĠS a
ĠRail way
Ġh undred
Ġher self
Ġcond itions
Ġpromot ed
Ġem b
ĠJ ud
ĠEmp ire
ĠA re
2 7
Ġp ow
ĠP an
and on
Ġcontin ue
Ġorgan iz
Ġf ellow
ĠI ll
Ġc ities
Ġg as
ce nd
Ġe th
Ġ197 6
ĠG overnor
Ġconstruct ed
it an
) ;
Ġhistor ical
Ġ197 4
2 6
Ġd irection
ĠO f
at i
Ġto ward
Ġcom es
Ġpass eng
Ġex tended
Ġ198 1
Ġs ens
ĠB ig
ap ed
Ġg iving
ĠIn c
Ã ¨
ĠDemocr atic
Ã³ n
Ġm ess
em porary
al i
S h
Ġl ies
Ġm echan
Ġp sych
Ġproduct s
Ġsc hed
v ement
ers ey
Ġrecord s
it ted
Ġ196 8
Ġth ing
ent al
Ġm aster
Ġlevel s
j oy
ĠF re
ĠH el
Ġm orning
ĠD utch
2 8
ist ed
Ġd omin
o ir
per or
c ol
Ġspe ak
Ġdis play
Ġfif th
ĠM os
Ġst reet
ĠSp ec
Ġd rug
Ġhon or
s s
Ġo il
ĠRad io
Ġst ood
Ġth r
Ġal leg
Ġnum bers
ĠRes earch
Ġ ess
Ġcap ac
Ġ197 8
Ġun ivers
ĠJ ul
Ġhousehold s
Ġfem ales
ĠM er
Ġ19 20
Ġproduc er
ĠÂ £
ad or
Ġdou ble
ad ed
Ġ197 5
l o
ra f
ĠAr g
ing er
Ġin h
Ġiss ued
Ġinc orpor
un ction
Ġtr ue
ĠSt ep
ĠG ar
Ġele ments
ĠDe f
ĠH a
c hest
ĠV ol
N o
Ġre ach
ĠPro g
ĠC ur
2 9
Th is
Ġsc ene
Ġs al
Ġg reen
ĠEar th
ĠE astern
ĠCon ference
ĠAl so
ĠT our
Ġcou ple
ĠLat in
Ġdis e
Ġprim arily
R A
Ġopp ortun
Ġm erg
ĠB ow
n y
ar row
ic ed
Ġsold iers
Ġcult ural
r id
Ġcont act
Ġb order
Ġa im
Ġyou th
Ġtransfer red
ĠEd ward
ĠLe e
ant ry
Ġsup p
Ġneigh bor
Å į
Ġord ered
Ġst ories
ĠCarol ina
ĠB re
ost on
g ian
ĠM iddle
Ġres idents
Ġw atch
Ġg re
ĠC le
ĠB ob
Ġappear ances
Ġ18 0
ĠCh arl
gy pt
ec ause
i as
res p
Ġanc ient
Ġc ounter
ĠPe ople
Ġ197 3
w an
Ġnewsp aper
Ġf ast
ĠM ah
m et
Ġmed ian
en ant
Ġelect ions
Ġcol or
Ġreve aled
Ġdemon str
ĠL ine
ound s
Ġpl aces
en ing
Ġp ack
Ġ197 7
br idge
k i
ight ly
Ġstre ng
iÄ ĩ
Ġrem oved
Ġhigh ly
end er
por ation
Ġst ars
Ġsec urity
Ġagre ed
Ġ ult
H e
ĠS ol
Ġam b
Ġ4 5
h ol
Ġp ra
ĠWh at
Ġprofess or
ĠT er
us hed
ĠD ou
Ġsmall er
ĠS at
Ġaut om
ĠA v
L e
Ġp an
ful ly
w a
Ġpolit ician
Ġlet ter
Ġinit ial
n am
C C
Ġapp l
Ġbelie ve
Ġ197 1
Ġprodu ce
Ġbl ue
ĠII I
ĠScot land
Ġc hem
ĠS und
Ġser ious
ag n
ĠSoc ial
ĠC ro
Ġin tended
Ġcon ver
et y
ĠIs lam
Ġst one
ĠL ong
or a
ĠB as
Ġp urs
ic ient
h ar
Ġ196 9
Ġparticip ated
ĠPr ince
Ġmus eum
Ġcomp uter
g a
ĠT ri
w ar
Ġre pe
ĠC reek
ra ight
y an
Ġprov ince
ell ig
Ġb it
Americ an
Ġen em
! âĢĿ
Ġon to
Ġfav or
Ġplann ed
Ġ3 5
Ġcomple t
Ġdist ance
Ġdou b
ĠPort ug
Ġr aces
ĠYou ng
ast ic
ĠE ll
en es
ĠThe atre
ress ive
ĠE gypt
ul ations
ĠW al
rug g
Ġnot able
Ġfollow s
Ġoffic ially
Ġact or
A S
Ġst ore
y ard
Ġoffic ers
ĠM u
ab eth
Ġr ule
Ġhead qu
i ated
ist ics
m ir
Ġbe aut
Ġ196 7
on ic
b our
am ily
Ġadministr ative
Ġproject s
Ġbas is
Ġm iles
n o
Ġdiv ided
ĠC ivil
Ġen joy
ĠDe v
g ar
Ġpar ish
ĠCon n
Ġprom inent
ug by
c el
ans ion
y e
ĠJ ones
Ġab ility
Ġun s
is her
os op
Ġme ant
ĠFound ation
Ġfig ure
ĠG all
u an
is ters
Ġp ict
Ġmet al
Ġprem i
ĠE ach
ĠM ajor
Ġgrow th
Ġb ird
Ġmat ter
Ġtr aff
ic ations
ĠJ ac
9 0
ent r
Ġstr ateg
ĠWilliam s
Ġro ll
Ġphys ical
Ġ ut
ĠCo ast
Ġbe at
ĠB oston
Ġp al
ans as
Ġcandid ate
ĠBe fore
it led
Ġpot ential
Ġh app
Ġrec over
cl ass
B S
Ġcould n
ĠBro ad
ors hip
19 7
Ġb asketball
ap h
ĠE lect
ian o
Ġexp ected
Ġtw enty
Ġtr y
Ġrec ently
anc y
ie ut
av ed
Ġren amed
Ġdestroy ed
ĠOr der
Ġcamp us
bur gh
ĠFranc isco
Ġc ard
o z
Ġr are
Ġpre p
Ġpos itive
aw a
ĠD i
velop ment
ĠSec retary
Ġat h
Ġch annel
ĠSer ies
Ġm outh
ĠG al
ĠIn f
ĠB ul
Ġconduct ed
Ġse ek
Ġalong side
ĠK ent
i ro
ap ers
k in
ĠR am
Ġlaw s
ĠMus lim
Ġs earch
ĠU kr
Ġ196 4
ĠL ab
Ġpurch ased
Ġcap tain
if ying
Ġup per
ĠT y
. )
ound ed
ce an
ad el
ĠM em
ribut ed
Ġwebs ite
ib ly
Ġcomplet ely
d ney
Ġpe ace
Ġmount ain
ĠH ung
r ance
Ġeffect s
Ġeff orts
oc ated
ĠTe am
Ġchar ge
Ġdefe at
ĠK e
ĠAd d
our ces
3 5
Ġpre c
Ġ /
iz es
Ġget ting
Ġth ous
ay a
r ad
Ġle aves
ri e
ĠP rem
ĠB BC
Ġsim ply
Ġded icated
ĠPhil ipp
ĠSt ation
ĠCent re
ĠM ot
Ġsp ot
ĠF our
Ġd ance
' m
Ġpres ence
ob ile
ĠB C
s en
ĠNew s
ĠJohn son
ĠMich igan
ĠRepublic an
Ġst rugg
Ġcommon ly
Ġcapac ity
ir med
Ġbeh av
Ġappro ach
Ġimp lement
Ġaccept ed
Ġw ear
Ġtyp es
Ġhistor ic
ĠH on
Ġsol o
re ct
Ġactiv ity
Ġref lect
ĠAs ian
Ġre form
ĠL y
Ġpr in
Ġte nd
Ġcan not
Ġtarg et
ĠSen ate
A A
cl es
ĠSt an
ĠAs ia
ĠM ax
ĠW ind
Ġwith d
ĠM en
ĠOh io
st one
ĠS and
Ġent er
Ġoff ers
Ġwork ers
ĠSe a
ister ed
a ith
Ġimp act
Ġ196 5
ag ement
ĠEl iz
Ġs ense
ph y
Ġse nd
Ġ ice
r ich
Ġ194 4
Ġtreat ment
il ly
4 5
ĠO pen
ad ing
Ġb ow
res h
Ġartic le
Ġst raight
el a
Ġass igned
Ã §
hen s
Ġshow ed
Ġ196 6
Ġg ained
b ook
Ġp un
Ġsettle ment
Ġr ac
Ġhous ing
Ġqu ality
ĠA venue
Ġe lev
Ġad ult
s et
ag er
Ġpro te
Ġ ir
Ġwid ely
ak a
ub e
ed om
ang er
ac hel
ieut enant
Ġbr anch
ĠA z
err or
Ġknow ledge
al og
ĠScott ish
Ġfac ilities
Ġmur der
Ġr at
Ġthere fore
al le
ĠT im
Ġsec ret
Ġadop ted
ĠHe alth
d ro
um ber
ir a
is er
ĠEng ine
ĠColumb ia
Ġw ild
ĠPol ish
or ation
ĠC ross
ĠB orn
enc ies
Ġdecl ared
Ġcapt ured
c an
ant ly
or ough
ĠSy dney
Ġag ricult
pt ion
ĠJack son
ĠH y
Ġserv es
j a
ĠSy stem
Ġfeat uring
Ġrecogn ized
ĠSt ar
ĠO x
Ġc oin
du ce
Ġconc entr
Ġf ix
ĠOff ice
Ġon line
ar p
Ġorgan ized
in em
Ġsil ver
il ing
Ġenc our
Ġmention ed
Ġsy mb
Ġest ate
en ge
il a
Ġw inner
b o
Ġm ic
is hes
Ġoccur red
Ġpress ure
os en
ĠP ost
Å Ĥ
ĠH u
Ġadministr ation
Ġsuff ered
Ġlarg ely
ge nd
ĠT op
ĠCor ps
g reg
ĠV an
Ġequip ment
ĠTh ree
ĠR ay
Ġform at
p an
Ġelect ric
m as
Ġper man
Ġdist inct
e z
Ġr ural
Ġ8 0
Ġh ol
Ġr out
Ġp aid
ĠM id
Ġn ucle
igh ter
Ġp it
ĠN ow
Ġrespect ively
g u
ĠT em
Ġassist ant
ĠS ever
Ġcontro ll
Ġsp lit
f ort
Ġlead ers
ĠAs h
Ġc ars
Ġcont ent
Ġsur pr
resp ond
Ġagre ement
ĠW all
Ġt aught
Ġab andon
Ġsitu ation
Ġro les
Ġdro pped
rick et
ĠGeorg ia
it ness
ste in
it age
ĠK enn
ĠD is
Ġtyp ically
r as
Ġgrow ing
ĠH arr
Ġoper ating
Ġestim ated
Ġc erem
Ġfl ight
h o
cl aim
Ġex ecutive
Ġp et
Ġcomp ared
Ġeff ort
Ġacadem ic
ig a
Ġvar i
Ġm ill
w in
Ġevery thing
ĠSh ow
w ith
Ġsp irit
Ġsh op
Ġcomb ined
im a
Ġm ax
h aps
Ġd yn
ĠHe ad
ĠT am
Ġrul es
ord in
ab y
Ġpurp ose
eder ation
Ġinte gr
Ġt ells
ĠPro t
av a
k o
ĠL u
ĠT re
Ġacc omp
i ate
Ġclub s
Ġtw ice
Ġact ing
Ġcontin ues
ĠB ecause
on ents
Ġse vent
Ġc am
arr ing
N ew
Ġown er
Ġgl ass
ĠE st
ect s
Ġw r
ent ed
Ġterrit ory
ĠJ es
Ġlangu ages
Ġbecom es
ul pt
Ġs uit
Ġb urn
et ts
ĠB ern
Ġs u
ĠB al
od ies
rop ical
ric s
Ġpul led
enn is
b a
ĠProfess or
Ġsem i
Ġsour ces
ra wn
Ġ( ,
Ġcitiz ens
ĠV iet
Ġ Å
us ion
ĠF e
I S
r ical
ic ted
p ass
ourn e
Ġt ree
ot ed
Ġresult ed
ion e
Ġsugg ested
Ġcommun ities
Ġdram a
Ġinter p
Ġs ales
ĠJ ersey
or ter
Ġreview s
Ġschol ars
h u
Ġm ut
Ġmix ed
ĠAlex ander
Ġtit led
Ġbur ied
ĠH ospital
m iss
Ġalbum s
ĠR ome
Ġdam age
A C
ol ved
Ġhe av
Ġqu ite
7 5
Ġb al
Ġg ives
s es
D on
Ġ194 2
Ġl osing
ro g
al ing
on to
l ict
Ġ196 3
Ġ196 2
Ġcon clud
ct ions
Ġ !
Ġt ask
y er
Ġtr ust
ĠO tt
Ġrem ember
Ġcontro vers
Ġ era
Ġteac her
Ġcond ition
ĠA p
Ġgo es
Ġwe ight
b it
Ġgre ater
Ġsurround ing
Ġfin ish
Ġa wards
am ber
k er
ĠBro ok
per ial
Ġd ensity
ĠL i
Ġnew ly
ric ts
Ġpos itions
ĠVictor ia
Ġhold ing
Ġm ales
Ġstop ped
Ġ194 8
à ¤
Ġcon ference
ĠW ater
ĠC ard
Ġindust rial
Ġepis odes
ĠF ederal
ĠAl bert
Ġsing les
ino is
ĠC y
ĠBer lin
Ġr isk
ĠA th
Ġ17 9
Ġl abor
Ġrec omm
ĠG ood
ĠF C
Ġexp anded
ter y
ĠArg ent
ild ing
ĠS ong
ach us
ĠO s
z y
ĠAnd rew
Ġc ab
in ity
Ġn arrow
ĠEliz abeth
ĠK ong
ĠHistor ic
Ġres ident
rop ol
if orm
Ġsup pl
Ġhost ed
ic ine
ĠC E
Ġ7 0
on ia
Ġf ully
Ġre duced
ĠCor poration
Ġrece ive
wh ich
iv ity
Ġbro ke
Ġpat tern
Ġtri al
Ġret ire
Ġw ing
ut ed
Ġsett led
Ġl y
Ġfight ing
Ġdef in
Ġfootball er
Ġt rou
k ins
Ġsp ring
Ġlead ership
Ġident ified
Ġprov iding
l oad
Ġpl ants
' d
Ġy ards
5 00
ĠV er
Ġadd ress
Ġpart ies
Ġmot or
c hen
ĠF ield
Ġch ampion
ir ty
r or
ed d
ĠDan iel
sk i
3 3
ĠAm ong
ĠPr ime
Ġresp ond
on ent
Ġ194 1
ĠBl ue
Ġcor respond
Ġjoin t
if ul
Ġpain t
Ġcrit ical
Ã ±
ĠM as
Ġcorn er
ĠK en
m ad
Ġst ream
Ġsp ons
Ġaff ili
udd en
Ġv ess
Ġgrant ed
ĠA ri
od ay
ĠC orn
Ġf air
ack s
! "
Ġsitu ated
ĠDe velopment
ĠIll inois
ĠBr ig
Ġun ion
Ġmod els
Ġdr ive
ĠOlymp ic
Ġyoung er
ĠJe ff
th ur
Ġmunicip al
Ġtit les
Ġun c
Ġ194 6
un te
ĠB ang
ĠR og
Ġear th
ĠH ong
Ġseem ed
ĠJ r
ĠCap tain
ĠL ove
om ew
Ġco al
19 6
Ġd og
Ġnomin ated
ĠUn ivers
Ġun ique
n es
Ġhor se
Å ¡
ĠIs lands
Ġcon vers
ĠM inn
Ġresult ing
Ġdig ital
Ġs ides
ĠT ay
T A
Ġfl ag
y al
Ġ9 0
Ġb ott
Ġ194 3
Ġtre es
Ġsugg est
Ġorganiz ations
ĠB a
em et
b ec
Ġcre ation
Ġtraff ic
Ġ196 1
Ġp air
ĠP en
Ġt im
ist ance
ter ed
Ġsex ual
uck y
Ġel se
Ġdr ink
Ġl ibrary
Ġv ac
ĠB ishop
achus etts
Ġ urban
Ġim age
ĠJust ice
Ġbeg ins
Ġpiec e
ĠV ill
Ġgirl s
Ġh ar
ĠLit tle
Ġrec on
Ġre ject
Ġvot es
Ġsim ple
Ġs we
Ġ195 6
Ġnecess ary
ĠL ike
ĠD et
Ġs ect
ĠR oute
ĠD am
' re
ĠK ar
Ġrank ed
Ġinstr ument
Ġr ain
Ġconf irmed
Ġdo ctor
row d
ĠR aj
ĠQue ens
ĠCh ild
Ġconn ected
re c
Ġcont est
i ot
form ation
Ġimm igr
a un
Ġmark ed
Ġb ought
Ġch o
ĠE ven
A nd
ĠT ro
Ġbe y
Ġmin ister
ĠMass achusetts
ĠUS A
Ġnorm al
Ġch osen
Ġhappen ed
Ġref used
Ġsc oring
ĠMin istry
Ġallow s
in clud
Ġ193 9
Ġc arri
Ġneed s
Ġclaim s
Ġcont emporary
ĠC z
Ġobtain ed
Ġsl ightly
Ġcol umn
n ce
erv ative
Ġallow ing
ĠD uke
Ġperforman ces
el d
ĠComm on
o h
om s
ap ped
hem at
ĠL ife
Ġrap id
Ġpain ting
ĠD ar
emet ery
Ġcomp l
n ic
ĠH ind
Ġbey ond
Ġconstit u
Ġappl ied
Ġprov inc
M A
ĠJ on
Ġ194 7
Ġdist ribution
est ic
stit ution
Ġp arliament
Ġattack s
Ġex act
adel ph
ĠGu ard
Ġte aching
B l
ĠOff ic
b ourne
ĠPak istan
im s
Ġh abit
w w
Ġ4 4
Ġsucceed ed
Ġs and
Ġche ck
Ġse ats
l ers
ĠB ase
Ġst ock
Ġliter ature
i at
Ġclass es
a wn
ĠH or
Ġbeg in
ĠW ild
Ġl iber
Ġsoft ware
Ġsp ort
Ġc ry
Ġsh all
Ġsc ulpt
d iv
in y
ĠL ady
Ġcons um
Ġ *
u ous
ul es
Ġf ine
Ġpower ful
ĠU l
Ġ195 8
ĠSup reme
Ġg overn
Ġexper iment
Ġn ort
Ġbrother s
Ġf ish
a ug
ĠO k
ĠM ike
Ġsecond ary
on om
ĠL ew
ĠJo e
ĠW ay
ĠM ir
Ġ195 9
ash ion
Ġachie ved
Ġanaly sis
g al
ĠF I
ĠEn ter
Ġofficial s
ur er
Ġfac ility
am in
Ġc ells
Ġdise ase
ĠHigh way
Ġsup ply
Ġass ociation
Ġhe ar
Ġf ought
Ġform ation
se e
ra q
3 6
Ġsit es
olog ist
om er
ĠTh rough
ĠKore a
ron ze
adelph ia
3 8
Ġfe ed
Ġstand ing
Ġ3 2
Ġcom edy
Ġgu ard
ath an
ĠP op
Ġf estival
Ġv an
Ġun able
ĠEx p
Ġocc asion
ĠB ol
Ġb ul
Ġreturn ing
Ġmem ory
Ġmag n
ĠG h
Ġex tend
v is
Ġhold s
Ġacc ident
r ig
ĠF ar
Ġ3 6
Ġconc ert
n el
Ġ5 00
Ġbr and
ĠC op
Ġinj ury
Ġchall eng
Ġro of
Ġlaun ch
ĠO nt
g g
ĠJe an
Ġc aught
Ġcont ain
ĠB ell
ĠN ether
Ġmeas ure
ĠTor onto
ĠAl b
Ġd ial
Ġfig ures
Ġcomm ittee
Ġw ays
Ġapp arent
Ã¡ n
Ġunder stand
ĠBr idge
Ġheadqu arters
ak h
ĠSwed ish
out heast
ellig ence
ĠS her
ĠA k
man n
Ġreport s
Ġvers ions
w estern
ĠRev olution
ru it
ĠR el
ĠW at
E C
ĠSpec ial
ĠSt adium
ĠHar v
Ġ195 7
Ġphil osop
i h
w ater
Ġext ra
Ġg one
Ġadv anced
ĠL ibrary
ĠD un
ĠP ress
M S
Ġdesign ated
Ġauthor ities
re al
ĠH un
Ä ±
Ġact ress
ĠProg ram
Ġrel atively
Ġm is
anc ing
ĠG ame
Ġrest aur
Ġexist ing
ult y
g n
ur d
tal ion
Ġc ode
Ġdef ined
Ġtr ains
V D
Ġs ons
ĠN etwork
Ã ¸
Ġl ake
Ġwall s
pt on
Ġport ion
Ġpro ceed
ĠPol ice
f l
P A
Ġj ourn
igh th
Ġtow er
u er
Ġscient ific
ĠSever al
ĠOx ford
ĠF le
Ġsle ep
Ġthem e
im inal
chest ra
ĠCon f
ĠAir port
ĠPhil adelphia
Ġanim als
3 4
ĠOnt ario
ou red
Ġauthor ity
Ġconf lict
Ġf ans
3 9
ac ement
o es
id ay
Ġsurv ey
Ġsub s
F C
Ġdes cend
ul ed
Ġreg ions
orn ey
ot y
ĠF ox
Ġopp osition
Ġold est
ĠC a
Ġaud ience
el ve
ĠM aster
Ġath let
Ġr ing
" ;
E S
Ġ195 2
Ġmach ine
all s
ul ate
ĠAr m
Ġdis app
im al
Ġbre ath
Ġpart ner
Ġcreat ing
I s
Ġattack ed
Ġinsp ired
Ġst orm
Ġmaterial s
ĠCh ris
Ġed ge
Ġsaf ety
it ors
Ġfrequ ently
Ġro b
ast y
e ed
ĠEm peror
Ġey e
Ġfound er
Ġent itled
ĠU r
se x
ĠCh air
Ġy ellow
3 7
ĠSant a
Ġw ond
Ġ195 5
Ġarrest ed
ĠR od
ĠL im
con t
w ing
ĠAtlant ic
Ġs un
Âłm m
ak ers
Ġt al
Ġbro wn
Ġvill ages
Ġele ment
Ġph one
ĠF air
Ġb ill
Ġtem ple
Ġa ired
Ġfl ood
Ġact ions
Ġas pect
Ġ194 9
ĠS us
ĠB udd
Ġ6 4
ĠN az
Ġg overnor
ig g
ov a
U n
Ġe c
ip ped
Ġad vert
er land
ĠK r
ri f
ell er
ĠV en
Ġsc ript
Ġwin ter
if ically
ang ing
cent ury
Ġk ick
Ġcrit ics
Ġcover s
ĠM ain
Ġdist ricts
Ġfoc used
w ise
ĠRep resent
Ġsh ut
v in
ĠI raq
ĠFore st
we ight
ĠReg ister
ĠN ations
ĠS pe
ĠK el
Ġet c
Ġattempt ed
ĠInd epend
Ġch ance
Ġwind ow
Ġag o
Ġd aily
Ġsh ared
j i
Ġvis ited
Ġsix th
s m
Ġ iron
Ġ Î
Ġprincip al
ĠG i
Ġcomm ander
ou ri
Ġ195 4
Ġprot ection
4 7
Ġlo an
Ġs urn
d a
ik i
Ġt all
ĠA ff
ĠIn tern
w orth
ĠNether lands
Ġgu est
ĠS ports
Ġc old
ĠB and
Ġchair man
Ġsy n
ĠWil son
Ġv en
Ġtown s
Ġal t
ĠH ay
ĠSer b
Ġw arn
Ġc ert
ĠCast le
Ġset s
Ġc rowd
b ro
Ġpro f
Ġun known
Ġav oid
Ġr ough
ĠU N
ĠCol on
Ġattempt s
re p
are t
Ġro yal
Ġthe atre
Ġcop ies
Ġ Ð
Ġstreng th
1 00
Ġhe ight
o is
Ġenem y
Ġ195 3
al so
Ġdeterm ined
Ġpolit ics
Ġm ile
Ġwalk ed
Ġdel iver
er al
Ġwrit e
i ary
il ton
ĠTur k
ĠD ue
Ġb illion
ĠBet ween
Ġill ustr
os l
om ot
v an
Ġar ts
te xt
Ġex change
Ġem ot
Ġ< /
Ġcomb at
ĠHist ory
Ġesc ape
L A
Ġneighbor hood
Ġm ine
Ġterm in
f riend
Ġcle an
Ġh our
er b
ĠH ome
Ġf resh
ĠTay lor
4 8
ograp hic
av el
l aw
ĠN ic
he im
Ġset ting
Ġeffect ive
Ġpro s
Ġro t
% )
Ġadv ant
Ġpublic ation
Ġpiec es
Ġc art
a ver
ĠMar c
ut ional
Ġfield s
Ġag ent
Ġst arring
ĠMar sh
Ġw arm
hed ral
Ġb ass
Ġdep end
Ġoccup ied
Ġre ady
Ġexp ress
oth ing
ĠKore an
ann a
ill ing
Ġemploy ed
Ġsubsequ ent
ĠSwed en
ĠPrem ier
Ġs udden
as y
Ġany one
E R
Ġrefer ence
Ġcr ime
rup t
ĠM un
Ġdoes n
Ġch oice
ĠInd ust
Ġpromot ion
Ġhigh way
Ġconsist ed
Ġhot el
Ġperform ing
ren ce
Ġmethod s
Ġex clus
ĠL oc
ur ance
em an
ig en
ĠC ub
se y
Ġl aid
H L
Ġres c
Ġdist ingu
st ead
Ġre asons
Ġ _
Ġappro ved
ĠT oday
Ġshort ly
Ġexist ence
Ġte le
Ġport ray
Ġre act
Ġfund ing
l an
Ġopp osed
Ġb ud
ĠCz ech
Ġlearn ing
st ruction
Ġwr ong
Â ²
ph as
b u
is f
Ġair port
Ġpre par
Ġres ources
Ġfl at
Ġrece iving
Ġv on
Ġ195 1
Ġext ensive
Ġsp ect
ĠOn ce
5 5
Ġnot es
Ġseem s
d d
Ġbase ball
ĠA ut
Ġent rance
ĠB ir
ĠAnt on
Ġs omew
ain ts
es h
or ph
ĠTh ough
v est
Ġel imin
ĠM ov
ly n
Ġ19 18
ĠE nd
Ġvehic les
C O
rop ri
3 1
c ome
iqu es
S p
ĠP ers
ĠA h
Ġh arm
am m
idd en
an z
Ã© e
ĠB h
ay er
Ġhe ro
ĠReg iment
ill ery
Ġeconom y
ĠN ick
Ġend ing
ĠH al
Ġvoc al
u ct
Ġweap ons
ropol itan
Â °
Ġgl obal
Ġformer ly
ĠE conom
ĠN ight
Ġval ley
ĠL ight
Ġneg ot
an th
Ġlet ters
ĠBr ad
ra ham
Ġcommission ed
ĠAt t
I A
4 9
ĠE p
Ġcal c
Ġback ground
Ġf aced
Ġbas ic
ly wood
ĠH uman
wh ile
ĠOr ig
M y
in th
ĠSte ve
ĠBus iness
ĠMed ia
Ġ193 6
Ġn ob
Ġend s
ĠD ie
c hers
d r
Ġent ry
ĠAdd ition
Ġk il
Ġvehic le
Ġsp ok
Ġ |
Ġ( ;
l s
ĠE arl
ĠAth let
Ġgun s
Ġdem and
Ġa head
' ,
Ġ193 8
ĠTechn ology
p et
Ġsk in
Ġexp ansion
4 6
Ġsurn ame
' .
ĠBe ach
Ġf ear
ure au
Ġ â
ĠTown ship
ĠG reg
ĠComm and
3 2
Ġcont rast
Ġartic les
in er
Ġcall s
i enn
ĠK ir
Ġinv ited
ĠT ra
a is
ĠT al
Ġeas ily
im ens
Ġwe alth
Ġex ecut
Ġfound ing
ĠG irl
Ġp up
Ġd ipl
ot hes
Ġinh abit
Ġ ign
Ġv irt
Ġread ing
ĠCommun ity
Ġcast le
Ġre ar
ak ed
Ġp age
Ġs ought
b ell
Ġon es
Ġle ct
B ill
ĠAre a
Ġfind s
ades h
st ream
g est
Ġevery one
Ġsy m
os a
Ġconver ted
ĠT ime
Ġa uth
Ġarchitect ure
Ġfav our
ĠU s
Ġapplic ation
A ll
Ġengine ering
ol n
ĠMex ican
ĠDav is
ĠReg ion
ĠStep hen
Ġperman ent
Ġland s
ĠR om
Ġinstit utions
ĠOr gan
Ġdef ense
og ue
ĠC ult
Ġv ent
ul s
ĠW alk
Ġmax imum
ow nt
out s
Ġk iss
um es
ĠG en
Ġheav ily
ony m
ĠCol or
Ġcontribut ed
ĠAb b
ĠH an
Ġoffic es
os ite
Ġplann ing
ock ed
ĠT enn
ĠMount ain
ĠE s
Ġext rem
Ġdocument ary
m outh
sk y
ann ing
Ġpass ing
ag a
am ing
Ġp ull
Ġ3 8
Ġm ist
Ġworld wide
ĠR h
Ġcanc er
Ġcons ult
Ġabandon ed
Ġd ry
Ġhead ed
os h
c ow
ut ies
Ġinst ruct
re es
Ġr ise
Ġretire ment
Ġcent uries
ag an
T hat
Ġro w
ĠAd ministr
Ġim pl
Ġcont aining
Ġspe ech
Ġ ...
iv als
Ġsh ape
or row
Ġr acing
Ġim ag
ĠAr thur
n s
ĠN A
Ġocc urs
Ġsecond s
Ġopportun ity
ĠL ind
ar ia
ĠM anc
ra h
Ġs ac
Ġre aching
Ġgr ade
Ġpre fer
Ġf uel
ĠB ad
es ter
Ġref ers
Ġw rest
inn ers
ip e
Ġl oad
CA A
Ġaltern ative
S c
Ġact s
or gan
re te
ĠF urther
Ġpow ers
Ġdevelop ing
Ġm igr
Ġult imately
Ġb es
Ġprov ed
el le
writ er
Ġper fect
Ġh un
ĠT est
er ick
ĠS ab
ĠSh ort
Ġbro ken
ĠO b
Ġtr ail
Ġo x
h r
in son
Ġent ertain
ĠW ell
Ġsuccessful ly
ĠS om
Ġcl imate
ĠC irc
ĠMar ia
Ġc as
os is
Ġcont ained
Ġocc as
ur ches
Ġw orth
ĠM P
Ġconn ection
ĠP ower
ĠF ord
um s
Ġh ope
Ġbo at
ĠFranc is
ĠSt and
Ġentire ly
for mer
us es
ĠUp on
ĠPri or
Ġprop os
ĠP o
ĠOn ly
Ġ3 4
Ġloc ations
Ġem phas
e lect
Ġ17 8
Ġmin ute
D S
Ġpil ot
Ġproper ties
Ġ193 7
U S
id ers
ĠInd ones
Ġstruct ures
Ġrepresent ing
J o
ĠIn t
ĠL t
ĠJ er
Ġb odies
m es
Ġfin ishing
Ġord ers
Ġdef end
ĠAmeric ans
l ong
ec e
ĠR oss
ĠAl f
Ġder ived
l ife
h ire
a ud
ĠW el
Ġcaus ing
Ġmet res
ĠK im
Ġth row
Ġfle et
O S
ĠLeg isl
Ġfund s
Ġexp ression
Ġgener ation
Ġd ream
ĠBro ther
Ġexper i
Ġ19 19
Ġa ware
Ġf illed
Ġposs ess
Ġstart s
Ġequ al
p ool
Ġhe at
g ment
z en
Ġm el
Ġident ity
m un
P S
ĠFor m
Ġfun ctions
we gian
' ll
Ġqual ified
uc cess
ĠChap ter
Ġap art
Ġste el
Ġad apt
ĠPri ze
ĠPro ject
Ġly rics
Ġ rom
Ġsw im
Ġfeel ing
Ġ3 3
Ġtemper ature
ran ch
ar ry
9 9
' ve
achel or
Ġanim al
Ġpl ot
ĠMel bourne
ĠAb out
Ġpol ic
ĠE very
ĠP it
Ġide as
Ġs ust
ĠMar g
Ġmult i
ĠSl ov
ĠJew s
ĠSpr ing
Ġclos ely
Ġtw elve
Ġbott om
Ġtouch down
ag h
Ġpr ice
Ġcomp ar
ol ished
ĠChrist mas
Ã £
ĠSund ay
Ġdec ades
ĠBar b
a fter
Ġth ick
Ġjud ge
Ġdom estic
ĠD VD
Ġsupport ing
Ġs ave
Ġexp ressed
Ġhum ans
Ġn arr
Ġcor rect
Ġt or
ĠD or
Ġinflu enced
ĠJ ournal
Ġ3 7
Ġst adium
e ke
az e
ĠF ederation
A R
ĠSqu ad
ind er
ap ore
Ġ191 7
ĠHol y
ĠG ro
ĠK han
Ġvol ume
Ġtechn ical
t ical
ĠCh annel
ad er
ian g
4 4
Ġdr iver
ĠLew is
Ġdec or
ĠMed ical
im ents
Ġform al
i i
ĠB or
re f
Ġband s
Ġde ploy
Ġcy cl
ĠJ unior
Ġop in
Ġincorpor ated
Ġrequ est
Ġprog ress
Ġg ets
pl ace
ap es
Ġcall ing
ĠK al
Ġsp oke
Ġb ronze
ĠH art
ĠF ire
ĠMos cow
Ġr ival
Ġre in
ĠTr ust
Ġmaintain ed
% .
f all
Ġmay or
Ġh ired
c ious
ĠL et
Ġgr ad
ĠB alt
Ġmot ion
ĠB arn
ĠN ap
Ġinc ident
le ts
ĠAn th
ĠS ix
inc oln
L a
Ġpartn ership
Ġf ashion
Ġqu ant
Ġd iam
Ġs ector
Ġfail ure
Ġn eck
Ġeng aged
Ġhy dro
Ġappoin t
tr ack
Ġboy s
Ġim pr
ĠS av
ak i
ak s
ole c
Ġalleg ed
Ġhy p
Ġtown ship
Ġopp osite
Ġ193 5
ĠN ative
Ġg all
r im
ĠJes us
Ġnucle ar
ĠTh us
ĠK at
Ġquest ions
Ġregard ing
Ġun f
ĠW ars
Ġc ru
Ġmy self
u ation
I C
ant ic
Ġd ress
w ick
Ġeduc ated
6 5
ĠNor wegian
Ġch ose
ĠT a
Ġtr ained
ĠE P
Ġ191 4
Ġestablish ment
ĠP ier
Ġrepe ated
p ur
Ġeduc ational
A F
Ġrelig ion
Ġmer ch
Ġsc ale
ĠCam bridge
Ġcateg ory
Ġeven ing
Ġag ed
Ġimport ance
Ġkill ing
ab ad
Ġre ign
Ġs ail
Ġcerem ony
oc ese
e qu
Ġcompos er
Ġsched uled
es ota
Ġaccomp an
Ġres ear
ĠCount ry
ĠNor way
Ġliter ary
Ġarg ued
ĠGold en
ac ent
Ġinter s
Ġso le
ues e
Ġinvestig ation
Ġintern al
ask a
Ġun cle
Ġobs erved
Ġbr ain
ĠG er
Ġbrief ly
ke ep
Ġposs ibly
Ġpass es
en z
ĠT ony
ĠJac ob
Ġk it
b ut
ĠL abor
Ġw itness
ĠSt ock
Ġph ase
Ġsupp osed
Ġf olk
Ġf aith
Ġvol unte
Ġprogram me
ow a
Ġmerg ed
ĠS u
Ġ )
am i
Ġcons ecutive
un ch
19 5
f ather
Ġa id
Ġproduc ing
Ġslow ly
ĠWe ek
Ġspec ifically
es c
ik a
Ġm oth
ĠB all
Ġinst all
ĠPhil ip
Ġdec re
Ġ193 3
Ġres igned
ver se
Ġstand ards
und er
ownt own
Ġd rop
Ġrecogn ition
ur ation
ost er
Ġa st
Ġenvironment al
Ġh ur
ĠM ilitary
Ġle gend
Ġper haps
Ġpat ients
ĠP ass
ord ers
ot ic
ĠManc hester
Ġviol ence
ĠViet nam
Ġpromot e
Ġbeaut iful
Ġvot ed
Ġsk ills
Ġ3 00
y o
ĠMinn esota
Ġpol y
Ġthink ing
our ce
Ġhom es
Ġst ating
Ġexp ect
ĠP ope
j an
Ġ19 00
re ll
l ines
Ġinhabit ants
ĠG il
st ate
ĠK ansas
ĠSt one
ĠSing apore
Ġindepend ence
Ġm arg
ĠS em
t hen
Ġm ent
Bill board
Ġb rick
p son
Ġ192 9
ĠD er
Ġst ret
Ġimpro ve
ĠWh it
w ich
Ġin aug
Ġcollect ed
C l
ĠB i
ĠQueens land
Ġreg istered
ĠPhilipp ines
al o
Ġpasseng er
ĠLe on
Ġg ain
ĠMem orial
er ts
ons in
ĠB ureau
9 5
us hing
Ġsc enes
ro c
ĠT ok
tain ment
ut ation
Ġbehav ior
ĠH ou
Ġvis ual
Ġfound ation
Ã º
ĠC ape
ĠL incoln
Ġjoin ing
Ġlearn ed
isc onsin
li est
ĠC ensus
ĠSc iences
el ess
ess ee
Ġsm ile
Ġc up
Ġrepresent ative
Ġstri ke
Ġcandid ates
ĠCl ark
Ġregard ed
Ġem p
Ġstat ement
reg on
Ġf ram
Ġbel ief
Ġc hest
ĠSim on
Ġro se
Ġwe ather
ĠT urn
Ġlim it
ĠMal ays
Ġre ality
Ġs an
Ġinst alled
k ing
Ġd oll
as hed
he red
ĠT ai
Ġ192 8
ate ur
ĠC as
ĠJan e
Ġ193 4
ĠH o
Ġshe ll
Ġs ell
Ġcl in
Ð µ
Ġadvant age
Ġc atch
ac ter
Ġprogram ming
Ġc ore
Ġneg ative
Ġtri p
Ġclass ical
Ġn or
b oy
ĠMiss ouri
Ġwould n
ut s
Ġjournal ist
Ġf at
is a
Ġsign al
ĠU t
Ġsaf e
ĠStud ies
Ġstand s
Ġconclud ed
Ġview s
Ð ¾
ĠB ru
Ġcompet e
ĠV o
k es
ĠS ri
it i
ĠN CAA
iv ered
ĠMr s
Ġj unior
Ġemploy ees
Ġeth nic
Ġl at
ĠW isconsin
Ġchem ical
ĠMill er
S R
il ation
tern al
Ġd ates
Ġs ort
Ġ4 8
Ġturn s
Ġbud get
ĠE th
Ġact ual
T C
7 6
ĠLab our
ĠG ab
ic i
w here
Ġc ool
ivers ary
Ġbird s
Ġex erc
um in
ick s
Ġprote in
7 8
ĠAust ria
Ġimpro ved
Ġinter act
ĠF ree
Ġv ice
ect ive
Ġexhib ition
Ġdescrib es
ĠL o
S P
ec ution
Ġtr uth
Ġadv ance
ĠF inal
Ġr ich
Ð °
4 2
ĠColor ado
Ġclos er
ĠPortug uese
Ġtrans form
ĠB os
Ġar med
Ġsurv ived
ĠTur key
ĠW eb
Ġre action
sp ec
ĠF inn
Ġsub stant
Ġcontroll ed
z ona
ĠF ellow
Ġh ockey
g ers
Å «
ĠTenn essee
Ġprofess ion
ĠC ab
ĠAd am
Ġleg s
Ġm ort
Ġsup por
ĠBar on
Ġgradu ate
Ġconsist ing
Ġland sc
Ġ191 0
om ing
ann ed
Ġk id
Ġfl u
Ġeng ines
Ġlead s
it o
ĠR ose
Ġ15 0
Ġ ille
Ġh ill
Ġs ale
Ġcaus es
Ġplay off
for c
Ġstay ed
6 6
Ġsing ing
Ġcon sequ
ism s
Ġad ap
itz erland
H ow
Ġwat ers
Ġgreat est
or i
Ġit ems
Ġinit i
Ġdet ails
Ġemer g
ĠM unicip
ĠN FL
ar o
Ġ7 5
Ġd rawn
ent ially
Ġpaint ings
Ġ4 9
k ed
Ġh uge
Ġoper ate
Ġloc omot
ĠO regon
Ġd raft
Ġfre edom
Ġcost s
Ġansw er
Ġmat hemat
r un
ĠH ard
Ġ192 4
Ġco oper
Ġinter ested
ograp her
Ġg od
Ġcor por
Ġv ir
Ġ4 00
ĠV ice
ĠM att
ĠW inter
at tle
Ġaff ected
ra it
D A
Ġpoet ry
Ġrul ed
Ġexp ed
ĠP oint
4 1
ĠIndian a
ĠT en
ĠG ord
ĠPl aces
Ġcr iminal
Ġw ins
and y
Ġw ings
Ġfl o
ĠR on
o oth
. âĢĻ
Ġ193 2
Ġshow ing
ubl in
Ġsol id
ag ues
f e
ad ow
ĠTurk ish
Ġprep ared
Ġval ues
ĠHar ry
Ġd ie
Ġf lying
ĠMary land
ĠSt at
Ġd uty
g or
Ġselect ion
Ġinj ured
Ġpar alle
un a
clus ion
ĠAff airs
Ġsymb ol
Ġdr iving
ell o
Ġcour ses
Ã£ o
Ġobject s
an es
ut her
ĠLiber al
Ġc ricket
Ġdis miss
b ox
ant on
z z
Ġreb u
Ġrem ark
l ig
Ġapplic ations
Ġj ur
ĠB ah
Ġ192 2
Ġpick ed
Ġpra ised
Ġus ers
n ight
ock s
el er
adu ate
Ġres erve
ol i
Ġs oul
Ġinter ior
iv a
Ġinter ests
Ġb le
ĠO cean
Ġexpl ained
in ally
ol is
Ġparticip ate
ro ke
Ġre duce
Ġwe ak
ĠTem ple
ĠW rit
al ty
Ġroom s
Ġad mitted
Ġa x
O h
or age
olog ies
Ġfact ory
Ġpict ure
ed ing
Ġp ool
Ġpurch ase
Ġen roll
ĠSw itzerland
Ġr ugby
Ä «
ĠN iger
Ġ192 7
Ġste am
own ed
Ġtechn iques
Ġ id
Ġb ond
Ġregular ly
as ure
Ġf iction
Ġstre ets
over ty
ĠMc G
Ġass ess
at ures
Ġeas y
Ġm and
Ġd ivers
om y
e ast
ĠF er
Ġroad s
Ġsy nt
Ġf ranch
Ġqu iet
ĠA uthor
ĠA st
Ġnort heast
ic ide
angu age
Ġres erv
ĠD u
Ġag ency
Ġ193 1
ol as
Ġjourn ey
Ġh ors
Ġc rown
s pe
Ġear liest
Ġcomb ination
ĠAri zona
Ġtr uck
Ġgr ass
Ġdipl om
Ġch ain
Ġass umed
ĠInf antry
Ġtyp ical
M ar
go ing
Y es
ĠEx ecutive
ic it
ic ians
Ġst ores
Ġacc used
Ġ192 1
Ġsh if
Ġres idence
j e
b ar
Ġbu y
Ġoper a
ac he
ĠG ram
Ġ191 2
T r
ĠB on
8 5
eke nd
ook ing
Ġperson nel
Ġwe b
he astern
h ist
S he
Ġground s
7 7
Ġagricult ural
Ġdist ributed
Ġwa iting
Ġwind ows
Ġad vent
Ġim ages
Ġinv asion
em ic
Ġdev ice
ĠMan agement
Ġt ick
Ġshe l
Ġunder standing
ĠI d
ĠY our
Ġcirc um
Ġn ick
includ ing
Ġac id
ĠJ am
l ah
ang a
Ġsubs id
ĠHam ilton
Ġt ropical
are n
ĠI V
ĠHow ard
Ġr aid
Ġkil omet
Ġcomm it
Ġf ly
gh an
Ġadj acent
Ġintro duction
ĠJ ess
Ġmic ro
Ġun us
ĠM ember
ord an
Ġrev olution
Ġgr aph
Ġc od
Ġsect ions
ĠMed al
ruct ure
Ġbene f
Ġm ap
ĠF M
ĠMag azine
Ġmiss ing
Ġco ordin
od ox
Ġres istance
ĠJ ay
Ġcon vent
ĠB eng
Ġf it
Ġdesc ript
Ġatt ached
ter m
ot o
Ġg arden
Ġdiffer ence
Ġsup erv
Ġcom ic
Ġanc est
we alth
omm od
ĠIslam ic
Ġcarry ing
Ġ192 5
ĠR oy
S o
Ġpremi ered
Ġp ione
Ġis lands
Ġcomm itted
het ic
ĠB urn
Ġs elling
Ġ3 9
he me
Ġn odd
ur day
Ġmusic ians
ĠBrig ade
Ġext ension
Ġt ail
ang ed
ĠFore ign
Ġhistor ian
ĠAl i
Ġwrit ers
Ġexperi enced
ĠD own
ĠN ich
Ġg ene
ang es
ĠSec urity
ĠAr men
Ġj azz
as er
ĠSw iss
qu es
augh ters
A s
ĠCro at
Ġoper ates
Ġbusiness es
ĠTe levision
ĠW y
Ġ192 3
ĠD omin
Ġturn ing
Ġconstitu ency
Ġwat ched
p oint
Ġequ ival
ik h
v ant
ĠB ab
Ġtri es
ang ers
Ġ191 5
Ġrem ov
ĠSqu are
Ġsevent h
ĠSt aff
Ġb an
az a
Ġpain ted
Ġshould er
Ġ191 6
Ġch urches
D o
Ġlic ens
Ġmed ium
ĠMe an
el ine
I T
Ġdebut ed
d am
ĠJo h
ĠR ural
Ġmess age
Ġe at
Ġ :
ĠT s
I N
ĠServ ices
Ġgood s
il st
Ġsm iled
ĠS um
ag u
Ġdec ade
Ġcharg es
Ġexam ples
ĠG ib
Ġengine er
ĠAb d
D P
Ġrail road
ĠEngine ering
Ġ192 6
Ġdesign s
Ġsub urb
Ġcharg ed
duc ing
d on
/ /
Ġun iform
k h
Ġexp and
ĠUkr ain
Ġrepl ace
Ġdel ivered
anc hes
ĠO t
ic ial
Ġf ired
ĠH ur
ĠEar ly
Ġbig gest
Ġen l
ĠWal ter
Ġextrem ely
r ac
Ġis ol
ol t
Ġnorth west
ab led
ĠH ere
Ġsec retary
Ġadv oc
B e
Ġr ating
app ing
ĠPal est
Ġother wise
Ġv o
Ġtr a
Ġw ave
Ġthe at
Ġe gg
Ġpresident ial
Ġphilosop hy
ug ar
Ġm ir
Ġreject ed
Ġz one
ĠMar ine
ĠL es
Ġpro ced
ĠL ieutenant
ĠD al
Ġwa it
E l
Ġcapt ure
Ġreg iment
Ġpol l
ie val
Ġass ault
ic ate
ro it
ĠDie go
enn y
ĠBu ilding
Ä į
ann y
Ġw ounded
res ents
ĠTrans port
ĠGre ece
ĠPr im
Ġdeterm ine
u v
Ġhead s
Jo hn
Ġnot e
ĠRe view
ĠAn ne
ĠFor ces
ĠL ow
Ġcomp osition
6 8
ĠT el
Ġs now
ĠB rian
Ġteac hers
claim ed
a ired
Ġacc ommod
Ġthous ands
Ġacc ur
ĠR em
Ġbat t
Ġde leg
av ia
Ġsp r
og ether
ĠP ot
ĠF ame
ĠKent ucky
Ġf ing
Ġnot ably
ĠF ront
Ġt error
Ġdam aged
ch ing
Ġown ers
se ason
Ġdeg rees
r ine
wh o
Ġres emb
ĠEnter tainment
unn el
ĠN aval
Ġsit ting
Ġp iano
Ġp ed
Ġlook s
Ġs ession
Ġmar ine
ĠAnd erson
ĠDou gl
ĠP a
ag en
Ġhapp y
ĠM it
ĠHol lywood
: //
ĠIsrael i
ĠZ h
Ġd rew
ĠK ey
ob e
ĠO ak
Ġm o
at ically
ĠD iv
Ġpurp oses
4 3
Ġcour ts
Ġpri ze
Ġpri est
Ġw ants
Ġsepar ated
Ġpasseng ers
Ġarr ival
Ġdep th
Ġc inem
Ġrep resents
Ġint elligence
ĠSquad ron
Ġb ag
Ġresident ial
ĠIntern et
Ġdis pl
Ġelect ronic
ĠK a
Ġaccompan ied
ĠHe art
Ġr ub
b urn
ĠF amily
the w
ay ed
ĠCol omb
Ġrel ief
ĠBow l
ĠH ockey
Ġb ot
ro t
ĠR en
Ġdoc uments
Ġst y
ĠA ud
ĠHou ston
ĠL ist
Ġref uge
Ġsur g
ar on
or ry
ist ol
Ġwood en
ĠI S
ile y
ĠD ur
on ly
Ġrac ial
Ġp overty
Ġfind ing
I f
t ure
ad i
Ġret ained
Ġapp ropri
p es
Ġstar red
le vel
Ġst ages
7 9
k now
Ã¼ r
Ġp ushed
Ġa w
Ġsequ ence
R C
ars h
Ġs ight
ĠCommon wealth
Ġpl ate
Ġup d
Ġfact ors
Ġco ff
Ġh am
Ġus er
Ġchall enge
ĠR a
R e
ill er
Ġs ed
ĠAr k
Ġobs erv
ĠV is
Ġd uties
Ġnodd ed
ast s
o a
Ġrespons ibility
Ġvoc als
ĠN at
Ġcon qu
ren e
ĠMiss iss
en h
Ġm olec
arg o
Ġren ov
ĠAddition ally
us al
ing ly
Ġcap able
Ġlaw yer
ĠIm perial
d ale
ĠW olf
ce ived
ĠPat rick
Ġcollabor ation
Ġshoot ing
ĠDo ctor
_ _
ĠSen ior
pp er
Ġte en
Ġover l
ĠA D
ĠBel g
Ġfix ed
Ġinvest ment
Ġcr is
ĠMay or
Ġsat isf
iam i
ĠB uck
ĠAll en
Ġin her
Ġdo ct
ĠCol l
ĠF und
Ġcred ited
ĠK u
d es
Ġb ishop
r um
h us
ipp i
ĠHot el
ĠConn ect
Ġsee ing
Ġv ary
ĠA le
ĠE ric
8 6
Ġtrans ition
Ġreturn s
Ġn one
ust ed
Ġrest ored
St ar
ĠS ound
ĠReg ional
Ġres ign
ust er
Ġth irty
Ġcommun ication
d o
ĠH ans
ĠQue bec
om pl
ÃŃ a
st an
Ġstep s
Ġfr ame
Ġpers ons
p o
d i
ast e
th odox
u ly
ĠRe al
Ġret ail
Ġman ner
cept ion
Ġrec ip
ĠF arm
P r
Ġv eter
Ġhelp ing
19 0
Ġwhe el
ĠH ills
Ġd ating
a ire
os ure
ham mad
Ġenc ounter
Ġh its
ĠL anc
Ġsubject s
ĠUkrain ian
Ġb aby
ĠN ik
ins ula
ĠVill age
Ġ4 2
Ġoffer ing
ex t
ĠFred erick
ĠIn stead
ev in
ĠM erc
Ġarrang ed
Ġm ilit
Ġtalk ing
Ġmembers hip
Ġcover ing
Ġf an
ĠG ri
Ġcomp ut
ĠR oc
rom e
Ġsignificant ly
Ġl iqu
og en
Ġsugg ests
Ġ191 1
ac c
iet ies
Ġinstit ution
ĠChair man
Ġc ous
Ġ191 3
Ġrout es
Ġstr uck
Ġuns uccess
ard ens
ĠA M
ĠB ry
ol es
ind ing
ĠAl ab
Ġg rown
raf ted
k ay
i able
uer to
ĠR yan
Ġren ew
v ements
ĠR un
ĠGord on
ĠLt d
ang el
j o
Ã³ w
Ġhad n
Ġinn ov
ĠR et
og an
ific ations
Ġt ank
ic on
Ġcred it
et ime
b ody
P h
Ġfor g
Ġcritic ized
Ġcontribut ions
ĠD anish
ol y
Ġdefe ating
Ġconv inc
A M
Ġdiv or
Ġs outheast
rent ly
Ġens ure
A P
ĠAdministr ation
ĠArgent ina
igen ous
au x
st ances
n ers
Ġcol our
ĠH ug
p a
Ġcl im
Ġ Ä
Ġw ine
Ġplan et
Ġpopular ity
I V
Ġ189 0
ad s
Ġrestaur ant
Ġj ump
ĠSar ah
ish ment
Ġbring ing
Ġl ips
Ġmeas ures
6 4
ol ly
ĠCl in
ĠD ick
Ġprot ected
av ig
Ġa er
ĠPl an
Ġgr ab
ĠTh ird
Ġem pt
ĠGr ant
ĠCh ile
Ġg ather
ac her
lah oma
Ġfact or
Ġra ise
ĠSil ver
Ġsever e
T S
ĠS el
ĠJ ordan
Ġ5 5
id el
Ġacc ompl
ĠB ou
Ġmusic ian
ĠA C
ic ut
Ġsurround ed
Ġp hen
Ġwe ekend
ĠPri x
Ġpre ced
ĠDet roit
o en
Ġopt ion
Ġexpl os
B I
rel ated
an ed
Ġaspect s
h ab
Ġassist ance
ĠGall ery
Ġflow ers
8 8
M an
ĠD ublin
Ġpubl ishing
ĠDes ign
Ġsouth west
F or
ell ite
ĠAn na
Ġfranch ise
Ġg ang
ĠMo ore
Ġexact ly
Ġinvol ving
ĠCommun ist
6 7
Ġtransl ated
Ġcomp r
ĠSam uel
Ġt ied
ist ant
Ġv ision
Ġcross ing
Ġut il
iss ance
ĠMean while
e lection
Ġclass ic
ĠDougl as
Ġbe ar
Ġcon text
Ġneigh bour
Ġ190 8
Ġve get
Ġrele g
Ġch ampions
Ġpain ter
Ġsp end
er ies
ĠCE O
Ġpolic ies
h ost
aval ry
Ġn aval
Ġd aughters
od ge
Ġcy cle
ĠAlab ama
ĠHarv ard
ĠAd v
f ound
ar ant
ot te
ĠB art
m ers
Ġrough ly
ĠD ave
Ġsomew hat
Ġexcept ion
Ġdef ensive
Ġdiffer ences
Ġmy th
ĠY outh
ĠC emetery
Ġdev ices
Ġdem ocr
ĠI owa
ĠE c
uz z
il k
ĠAl bum
edd ing
Ġinterp ret
Ġarch ae
ĠAnth ony
Ġfac ulty
Ġopin ion
Ġm obile
Ġcom fort
ĠRepresent atives
6 9
e or
Ġw inners
Ġpoin ted
ĠR y
in ch
bor ough
ĠHarr is
ĠMod ern
Ä ĥ
Ġann iversary
Ġthe ater
ĠHaw ai
ĠP uerto
Ġauth ors
ĠL yn
Ġsol ution
in burgh
ĠDe an
Ġrequ ires
T O
Ġb are
Ġflow s
Ġconcern s
ĠChild ren
Ġpl ane
Ġappear ing
ang erous
rap h
ĠV ienn
The re
com ing
um a
Ġmed icine
ĠLouis iana
Ġprovinc ial
Ġschol ar
Ġlegisl ation
b ass
ĠOffic er
Ġsur re
Ġs am
E E
Ġorgan isation
Ġrel ative
ri x
Ġmet ers
Ġmar ry
Ġmin ing
r ons
ĠAf ghan
B ut
Ġinst ance
Ġlink ed
ĠS in
c ar
ĠM and
ĠRail road
Ġr ates
Ġt ur
Ġmur d
Ġfr ag
Ġland ing
Ġwalk ing
Ġfall s
rib ute
over s
ĠT ournament
st ar
ĠSt ew
ĠOk lahoma
ĠR ick
ĠSp ace
Ġunivers ities
Ġcomm une
ĠM iami
Ġadap ted
ĠMat thew
m osp
ĠComm ander
ĠCh art
ĠTai wan
ĠDen mark
Ġt ack
ĠBr un
Ġnov els
hy th
id ges
ĠP ear
ĠOtt oman
Ġr u
ĠJu an
) "
Ġnick n
ĠMor gan
iec e
ĠS on
ot ten
Ġmount ains
Ġhors es
Ġre nt
ĠPh ill
ĠN a
Ġen h
ĠC ost
ĠIn n
i ac
ĠP ict
ĠMount ains
Ġd owntown
Ġthreat ened
cript ion
Ġprot est
us cript
ĠN Y
ĠDep uty
ĠCo oper
ĠBelg ium
. '
el and
Ġreal ized
oy d
Ġphot ograph
Ġking dom
N e
Ġconcern ed
ĠB erg
Ġf ur
ĠW in
Ġimpr ison
Ġbr anches
Ġp apers
hes s
ĠR ey
d ie
Ġsudden ly
Ġsuccess or
Ġcolon ial
ĠT reat
ant e
el son
ĠL ank
ĠMississ ippi
Ġstep ped
Ġbr ig
Ġexper t
ather ine
Ġclass ified
ĠF ive
Ġ( ),
w en
ĠCon stitution
ĠMc K
m m
Ġweek ly
Ġrep utation
Ġbank s
Ġkeep ing
ist a
Ġconst ant
ph one
ĠD C
ĠCon c
ĠP ap
ene z
l ad
p ir
Ġ ]
arn er
ĠK am
Ġmiss ed
ĠG ulf
Ġparalle l
Ġse ed
ĠK arl
Ġachie ve
ĠEd inburgh
ĠB ack
Ġsec ure
ĠE ag
Ġbene fit
Ġspirit ual
c ons
Ġan th
Ġal co
Ġup gr
ĠG erm
ĠMont real
Ġtechn ique
ow ed
Ġchild hood
ĠBrazil ian
Ġadd ing
ard o
Ġmass ive
7 2
Ġpract ices
ĠRober ts
enc ing
Ġaff ect
Ġown ership
Ġexist ed
Ġact ors
W ell
Ġask s
st ruct
O n
im ore
ĠS R
ĠBat talion
Ġf old
ĠL iver
ĠRes erve
pro fit
ĠBase ball
ĠKel ly
Ġpublic ations
Ġwear ing
Ġst orage
Ġthous and
ĠPol it
ĠPal ace
Ġsc heme
Ġdiv isions
ĠN ev
Ġequival ent
G eneral
Ġent ering
e ff
Ġd ies
ĠC are
Ġvict ims
ĠL in
Ġrec ru
ut t
Ġdo ors
ĠTam il
er k
ĠUkr aine
pect ive
Ġso il
Ġform ally
Ġstud ying
Ġrepl ied
el lect
in ian
9 8
Ġte ach
Ġprison ers
Ġrequire ments
ĠExp ress
Ġcris is
ag g
S C
all as
if er
ĠDis ney
Ġref ere
ĠH amp
ĠL ive
ili ar
ĠTer rit
m ate
it er
Ġdep os
Ġprom pt
Ġcar bon
ate ver
ĠOr chestra
ac le
ig ious
Ġpeak ed
amp s
Ġform ing
Ġ x
Ġm ental
Ġtest ing
e enth
u i
ĠAust rian
Ġrepl acement
6 2
ĠR ugby
Ġw et
f rom
Ġg ender
mir al
ĠAl an
Ġ188 0
ĠIndepend ent
ĠC ow
or ia
Ġjur is
ĠSat urday
ĠSe e
s ch
ĠEr n
C on
5 8
ĠPit ts
Ġcam era
Ġpre t
ĠU C
Ġincreasing ly
Ġconsider able
Ġc ards
ĠColon el
d oor
Ġun p
iv ated
Ġcou ples
ac on
Ġfing ers
Ġcoast al
ew ay
Ġclear ly
ew ork
Ġob vious
ĠSh ah
Ġ190 5
ĠConnect icut
ĠMarg aret
Ġhost s
Ġt ie
Ġnot ice
Ġcelebr ated
Ġdecl ined
ĠA ge
ĠAtlant a
Ġtransl ation
ĠWel sh
ĠD ig
D e
Ġf al
ĠN ag
ĠAss oci
Ġspok en
Ġcompet itions
Ġtem porary
as ters
" :
Ġsquad ron
Ġl ose
ur i
ĠE le
E n
Ġadv is
ĠAnton io
ĠA BC
ĠPr in
b al
) :
Ġcomp onents
ĠUn like
Ġvisit ors
Ġover se
Ġind icated
Ġweap on
Ġjust ice
Ġme ets
Ġb ath
Ġear n
Ġstrong ly
Ġap artment
Ġinstr uments
Ġcritic ism
in tend
Ġf ruit
E A
Ġvis ible
Ġf ict
Ġ190 6
he w
um ped
Ġexper iences
Ġconc rete
Ġdi agn
Ġf er
Ġbr ight
Ġchart s
Ġappoint ment
ĠSk y
Ġbe ach
le te
ĠC arn
I P
Ġabs or
ĠL am
ĠI ron
ens es
un es
Ġf ishing
ex p
ĠR ights
ol id
Ġoccup ation
ounc ed
II I
Ġdraw ing
ten ance
ĠLa ure
Ġre nd
Ġwh is
ĠP C
Ġdeb ate
Ġchang ing
M ay
Ġw el
ĠC rown
ĠR ow
vel and
ĠC ru
ĠF A
Ġinflu ential
ol ph
Ġele ven
r at
Ġthe ore
us ing
ĠK evin
t ic
t an
Ġsh ook
m ina
I nd
em or
Ġt ight
P ro
Ġcover age
ĠAlex and
Ġstrateg y
Ġmov ements
Ġcol leg
Ġ190 7
Ġt elling
Ġdes ire
Ġass ass
ĠKenn edy
ĠB an
ret t
Ġr if
Ã© s
ĠLaw rence
Ġexped ition
A d
n old
Ġprocess es
Ġp itch
ĠW he
Ġapparent ly
Ġforest s
ĠC ook
em en
ĠD NA
Ġmed ieval
Ġpl us
Ġman uscript
ĠP hys
Ġ4 1
st ory
Ġd ated
7 1
Ġf iled
c alled
Ġoccas ions
Ġthe rap
ĠStud ios
re hens
t op
6 3
Ġguitar ist
Ġenjoy ed
Ġdep uty
ĠWalk er
Ġspe aking
ĠK az
ed ia
Ġsy nd
Ġh ung
ĠC ass
Ġpo em
7 4
Ġmark ets
ĠPortug al
ĠLiver pool
ĠS port
Ġn ations
Ġann ually
Ġpropos al
Ġher itage
5 9
ĠN ever
Ġac know
Ġwatch ing
Ġlast ed
ĠVienn a
ĠB es
Ġrapid ly
ud i
ĠT rib
os m
ĠH ell
c i
Ġt ennis
ĠCle veland
Ġcross ed
Ġal ive
Ġdyn asty
ĠF il
Ġaccount s
anc er
Ġcho ose
it ter
ĠA y
Ġ190 9
and o
ĠSe attle
Ġass embly
ri k
Ġw ick
Ġvess els
oc ol
ĠMic ro
n i
ib l
Ġsh ore
A m
L C
Ġoff ensive
Ġc ited
Ġin ner
am ic
ĠMet ropolitan
W h
ĠHer itage
b el
6 1
Ġev olution
Ġpro hib
Ġkit chen
Ġqual ifying
pp ing
aster y
op her
Ġsuff icient
Ġwithd raw
ĠE ver
Ġoccasion ally
Ġhe aring
en ch
ĠD eb
Ġout put
ĠY ug
are st
igh ters
Ġfilm ed
Ġtre ated
Ġhundred s
Ġcontin uing
est yle
Ġf il
Ġel der
Ġunus ual
ĠF ern
Ġact ed
er ted
Ġrece pt
Ġg ar
Ġexc ell
ĠTok yo
Ġv ic
Ġmake up
Ġloss es
ĠWh o
Ġsign ing
rib ed
h ard
ig e
Ġev al
Ġw orship
Ġaff airs
C an
r m
Ġart illery
Ġgradu ating
Ġf urn
ĠK ings
rast ructure
Ġ Ġ
Ġpre gn
Ġden ied
ĠLoc al
ĠPet ers
Ġrecord ings
ĠMalays ia
5 2
Ġp ure
Ġass ign
ĠWith in
ĠH op
Ġrepl acing
Ġtravel ed
Ġ urg
ĠLegisl ative
Ġn et
Ġte x
Ġmem orial
Ġpr ime
Ġat mosp
and om
Ġext ens
- -
aw are
Ġattract ed
it als
bre ak
ĠP un
mer ce
ov es
Ġappe al
Ġfall ing
ĠF ac
er on
O R
ĠP ed
ĠAg ency
ĠB ush
or f
Ġto ols
Ġsur f
ĠLe v
Ġsurv iving
ĠL ane
Å Ł
ym n
Ġne ut
Ġround s
ab el
Ġunder ground
ack ed
t own
ĠOper ation
P l
ĠB ud
l ock
Ġbeg un
P C
ĠIndones ia
ĠD ark
0 8
r ated
hip s
Ġint ention
ĠM aur
Ġg rey
Ġne ither
Ġappro val
og y
" "
ĠH and
ĠHis pan
ĠK er
ograph ical
m us
c ing
Ġart istic
ĠCons ervative
E x
ĠO d
Ġvess el
Ġ190 4
Ġcomple tion
Ġsk y
ĠF al
Ġmanufact uring
per ed
Ġpr int
Ġbound ary
Ġp ric
S e
Ġg ate
ĠAll iance
Ġh urt
ĠHung arian
Ġuse ful
Ġl ap
Ġsound s
ĠP ow
ĠM ond
ĠOrig inally
Ġse es
Ã ¥
ĠU pper
ct ic
ĠBe at
ult an
Ġr ivers
ĠRog er
Ġlic ense
h and
ĠBalt imore
Ġn om
ĠS oon
ĠCon vention
0 9
ĠS ud
Ġh at
ph a
ĠN ob
Ġemerg ency
ĠIn it
ming ham
Ġsub mar
rap ped
Ġd angerous
Ġelimin ated
at in
ĠU nt
Ġcompet ing
r ation
le ased
ri p
Ġmag ic
Ġwh ilst
ament al
ant asy
Ġmod ified
ĠT it
Ġm ob
Ġille gal
Ġcous in
pr ise
ĠAl ong
Ġre un
Âłm illion
Ġdescrib e
ĠJ ason
ul ating
ĠDef ense
v ey
Ġr ide
in ction
ĠG arden
Ġsound track
ĠT ar
ĠV ar
g ress
ĠCo le
ess ions
se a
ater n
g un
% ,
rup tion
Ġatt orney
ĠC rit
Ġc rop
Ġw ides
iz on
Ġs ter
Ġl oyal
ĠHon or
ap olis
ĠHung ary
g ow
Ġ187 0
Ġemer ged
Ġamong st
Ġf led
Ġpan el
M P
b ishop
Ġsp ending
ov iÄĩ
ĠB ull
Ġgreat ly
Ġeffect ively
Ġrespond ed
Ġl ists
8 9
Ġt act
Ġw edding
e ah
ĠC all
ĠD a
Ġsuppl ies
ĠS i
ĠL ang
Ġst ress
Ġf est
Ġfrequ ency
ie ge
ĠOr thodox
Ġl augh
ĠJud ge
ĠE vent
b ra
Ġfinal s
ĠR ub
Ġmed als
Ġrest rict
Ġhabit at
Ġcr ash
ĠOper a
ĠAust in
Ġw ish
for ce
Ġmeet ings
ĠR ap
Ġcontrovers ial
7 3
Ġcirc uit
Ġis n
Ġ190 2
Ġinvol vement
Ġequip ped
ĠB eck
or ig
Ġdec line
S S
ĠV inc
Ġed ited
ĠC hen
ĠD isc
ĠM oon
Ġag ree
Ġmon ument
the less
Ġ190 1
ĠSen ator
Ġdistingu ished
Ġjuris d
Ġam ateur
ĠAg ain
ĠL as
f inals
ĠSchool s
ĠM ission
ĠCamp bell
ĠL ower
ĠBang l
O N
ract ion
Ġ5 2
iel der
E T
Ġexecut ed
ĠSing h
Ġchap ter
Ġcollect ions
Ġhon our
ĠM eth
ĠStew art
ell i
ĠConf eder
ĠB uff
Ġfac ing
ĠM ach
Ġvis iting
Ġbatt les
p at
Ġpat ient
Ġ4 3
W ill
ĠCat hedral
ĠR io
ĠP A
Ġsuff ering
p read
ĠD ream
b ach
b i
Ġ1 20
ann e
Ġcoff ee
Ġnorm ally
ar c
ĠNaz i
Ġrecomm end
oss ible
Ġsu icide
Ġdep ending
Ġt one
Ġdr ag
ĠYug osl
Ġnegot i
Ġsh ares
ĠCar ter
ĠN ep
Ã ®
ay an
Ġmin imum
ĠRuss ell
ph ony
ĠPe ace
Ġcount ies
s ec
or er
ĠFin ally
ĠN on
O r
Ġ190 3
Ġswe et
ĠBru ce
ĠFin land
ĠW ard
v o
Ġwhere as
Ġl in
Ġnomin ation
in ations
ia h
w all
5 1
ri ent
Ġmod e
Ġbe et
5 4
Ġcol le
Ġel d
ĠS af
ĠC re
ĠF ather
Ġpr on
ĠCh all
ĠBrother s
ab ilities
ĠN ash
Ġint ellect
Ġentertain ment
ĠN ort
Ġt ests
ial s
Ġex ists
z h
Ġch amber
ĠY an
Ġpen alty
Ġt urb
ĠD yn
gr aduate
ĠAnd re
Ġsw itch
ĠCh ampions
Ġnewsp apers
ap pe
H S
il ty
ĠK y
ĠJim my
ĠFle et
Ġe ighth
ane an
ĠGl as
Ġcontrovers y
ĠAthlet ic
Ã «
Ġdesign er
Ġag greg
Ġrecomm ended
Ġf ile
Ġdisc ip
ĠP ur
Ġelev ation
w ords
aw ay
ĠGl obal
ĠSh an
ok ed
Ġdefin ition
ÃŃ n
ĠThom pson
ĠBroad way
ĠFrank lin
sh aped
ch a
ĠPitts burgh
Ġinf antry
ĠAd ams
ent le
Ġrep ro
Ġfriend ly
Ġrec re
hy l
ĠEn vironment
Ġappro ached
Ġth ro
ĠMark et
Ġmod er
Ġcustom ers
est one
ĠBir mingham
se ud
Ġh ip
m ates
Ġl ob
ĠG ene
ic op
ĠL l
Ġjob s
ĠP as
Ġint ent
Ġinj uries
p erson
c op
ot ton
Ġimmedi ate
Ġgrad ually
5 3
G B
M us
ĠI l
ĠL ith
ĠShort ly
Ġblock s
Ġmiss ions
Ġus ual
le ton
Ġcomp ilation
i ors
ult ane
Ġremain der
on na
" -
ĠAuthor ity
Ġgen re
Ġresc ue
O C
ĠF el
ĠP le
ĠNot able
Âł k
th a
am ents
ĠO p
Ġafter wards
Ġse gment
ĠCh amber
ĠD allas
ĠR ound
Ġcomm anded
Ġvers us
Ġass emb
ĠH it
ide o
Ġgu y
ĠS et
ĠS n
Ġcas ual
ĠMet ro
F M
ĠN elson
is ition
m aster
am an
Ġt err
ear ing
ann els
Ġdon ated
Ġlandsc ape
Ġcomm emor
ĠCh ampion
c m
or us
Ġchampionship s
Ġmat ters
Ġmain tenance
Ġencour aged
Ġportray ed
E D
ĠMar ie
Ġpro port
it ched
ĠLit er
oty pe
ĠLe ban
z o
Ð ¸
Ġunder t
Ġ5 1
Ġparticip ation
Ġpost ed
Ġexpl ain
ĠDon ald
Ġdepart ure
f ire
te enth
Ġwides pread
ĠN orm
ĠH orn
l as
Ġprin ted
ol o
ĠVictor ian
Ġdirect ors
ĠAlf red
Ġtrad ing
ĠSy m
d y
Ġv ast
ĠJos h
hyth m
Ġl oved
che ll
Ġempt y
] ]
ĠWind ows
u y
t ra
ĠMor ris
Ġcomp lic
Ġpret ty
Ġthem es
Ġyoung est
ĠEn ergy
5 6
n oon
ĠMarsh all
Ġmov ies
ĠMic hel
st ic
Ġval id
Ġph r
ot es
Ġ4 7
Ġmarket ing
Ġkn ock
Ġsurg ery
ĠB ible
ath y
Ġelect oral
Ġbo ats
Ġag ents
ĠW right
Ġabs ence
ĠS uch
Ġ4 6
Ġext ent
ĠPat ri
ĠJ enn
Å Ħ
Ġrelationship s
Ġdom ain
Ġn inet
ĠHind u
Ġsurpr ise
W hy
Ã ´
usal em
ĠV ik
ock et
Ġsh r
Ġad min
ĠO ur
Ġdiscover y
ĠB ed
Ġinters ection
Ġpop ulations
Ġel ig
Ġm art
ĠN BC
Ġtrou ble
Ġposs ibility
Ġo dd
Ġlong est
Ġstrugg le
apt ist
e o
ĠJoh ann
Ġc able
ĠV enez
ĠKn ight
ĠT ig
Ġfict ional
Ġr ising
Ġp ale
Ġb low
Ġopportun ities
le ans
Ġcl othes
ou ver
on i
Ġan ch
ĠK it
ur ally
Ġth in
Ġbre aking
os ph
ĠF all
orpor ated
ĠW ol
ĠInd ians
Ġconc erts
Ġsoc cer
u ated
ren a
ĠH old
Ġcl oud
cast ing
Ġy ield
id ency
olog ists
Ġsupport s
Ġchap el
ĠB illy
ar at
Ġc ul
Ġunder st
or g
Ġcent ers
Ġsign s
Ġdoub t
Ġvide os
s uch
c ase
o om
Ġex ceed
at hered
Ġwrit es
ud es
i op
ail and
ĠL ib
ed ed
9 2
ĠUnt il
Ġres olution
Ġsil ent
ĠC BS
u h
Ġperiod s
Ġbenef its
Ġte eth
Ġemploy ment
ĠA T
Ġcol ony
Ġtrib e
ĠL uke
Ġarchitect ural
Ġapp ly
ation ally
Ġdrug s
Ġsat ellite
ĠHe nd
ĠProt est
ĠCharl ie
Ġcop y
Ġland ed
ĠJ ose
st al
ĠIn vest
st yle
5 7
ab s
Ġproduc ers
Ġnetwork s
Ġth rew
ĠIn formation
ick ing
Ġsurv ive
ĠRob inson
so ft
ĠBoy s
ĠS ac
u j
G r
C ol
ĠW hy
Ġinstrument al
m i
ĠA round
Ġatt ributed
b ound
Ġa f
Ġexp osed
ace ae
ann er
Ġdr iven
Ġagricult ure
forc ement
ĠAg ricult
9 6
Ġdiam eter
Ġex ternal
anc ell
Ġmov es
av an
Q u
ĠH aving
ĠM ack
Ġdest ruction
Ġsuppor ters
Ã© t
l on
Ġclaim ing
r in
G A
Ġadapt ation
Ġtransport ation
Ġag encies
keep er
as ant
Ġgrand father
Ġgu ess
Ġhe ll
Ġt unnel
Ġfem in
a uc
ĠBrook lyn
ĠS omet
Ġtou red
ĠOr leans
Ġaim ed
Ġbal ance
al ia
Ġ +
ĠHispan ic
e an
Ġmount ed
Ġpres erved
ĠPro duct
Ġcomment ed
Ġrepresent ation
Ġpass age
om es
Ġstr ing
Ġcl imb
Ġill ness
Ġseek ing
f am
Ġdef ending
Ġcharacter istics
9 7
Ġs ick
Ġcon vention
Ġknow s
Ġven ue
Ġcont ested
m od
or ous
Ġbelong ed
ach t
ĠP ubl
Ġask ing
Ġcreat ive
ĠVo iv
ĠD ak
ĠMur ray
ĠArch itect
Ġadv ice
Ġreg ime
* *
us c
it err
Ġnot iced
Ġst able
Ġadvert ising
ĠH um
as a
Ġpred omin
Ġins urance
ĠK l
Ġsim pl
Ġrul ing
ious ly
Ġbeh alf
Ġdet ail
ĠRoman ia
Ġsusp ended
Ġcompet itive
ĠV ic
ric ane
Ġast ron
á »
Ġcorpor ate
Ġfrequ ent
Ġsched ule
og s
Ġb on
Ġview ed
Ġst rict
Ġt on
Ġcab inet
Ġ189 8
Î ±
Ġer ected
ĠCh and
ĠPrin cess
Ġsent ence
Ġaud io
ĠArk ansas
ĠBe g
ĠI mp
ine a
Ġrecover ed
Ġend emic
Ġpal ace
ob a
Ġliqu id
oun sel
Ġindic ate
ĠA P
Ġsold ier
e h
Ġsubstant ial
m at
ĠGerm ans
ĠÃ ī
ch i
ĠH ad
ĠM ong
Ġdet ailed
ĠPl ace
Ġparliament ary
Ġremember ed
s he
ĠStan ley
m und
ric ted
Ġinf rastructure
Ġcateg ories
Ġfam iliar
ĠG raham
Ġw ars
Ġpercent age
ro ck
ĠDer by
Ġab road
ĠV eg
on ian
Ġev il
Ġclass ification
ĠTr aining
sp an
Ġd ub
Ġrepresent atives
ici ency
Ġdescript ion
ĠNor man
Ġdec ide
Ġclos ing
i est
ĠUt ah
Ġg ro
ĠJer usalem
odes hip
ĠCan al
Ġattend ing
Ġ186 0
iterr anean
be an
ark s
Ġstat ue
ort ed
Ġd a
ov o
ĠSt ev
Âł âĢĵ
ĠChrist opher
rou s
ĠN BA
Ġfif teen
Ġman age
Ġtal ent
Ġident ify
l ik
Ġphen omen
m ont
ĠU E
ĠTh ailand
port ed
ĠF riend
ĠAnd y
Ġgovernment s
Ġdem olished
l ie
ud a
Ġrank ing
p ers
Ġb id
f are
Ġrat io
iven ess
Ġin duct
ĠI b
iv ation
Ġtrib es
Ġc ash
ĠJohn ny
ĠMed icine
d in
l en
Ġcircum stances
appe ared
Ġinn ings
Ġdomin ated
ĠT ower
Ġhand ed
ĠRich mond
ĠEgypt ian
Ġpred ecess
Ġt ort
ĠW rest
Ġplatform s
ter ior
Ġrem ove
Ġmon itor
Ġabs ol
Ġparticip ants
Ġd at
ĠB enn
ĠCar ib
ĠThe ater
Ġthr one
Ġalco hol
Ġre ven
Ġvot ing
Ġoper ational
ĠA ld
Ġwork sh
ĠC her
Ġrank s
Ġdeath s
A t
ri el
ĠâĢ ¢
Ġo cean
Ġl ieutenant
Ġcont ribution
Ġinv ent
Ġthough ts
Ġres iding
Ġh al
Ġsty les
ww w
Ġob lig
Ġce ased
ĠK o
Ġposs ession
ĠCon stant
ĠVoiv odeship
ĠP y
Ġwond er
Ġgu ilty
Ġpict ures
Ġex cess
ig s
anc ouver
is b
ĠJos Ã©
Ġext reme
act ive
ĠGlas gow
and al
c ut
Ġl ie
ĠF ried
ĠVenez uel
Ġmathemat ics
Ġtem por
uss ian
Ġch annels
Ġdeb t
L et
Ġpat rol
og a
Ġassoci ate
ul um
ĠPort land
Ġappropri ate
ch o
ĠMeth od
Ġpo ems
Ġs aved
Ġsp aces
Ġadult s
re ck
Ġout er
Ġro ots
Ġproduc es
ir ation
r ank
Ġsm ooth
Ġto m
r idge
ĠC arm
ĠA R
ist ical
ro v
Ġview ers
it ure
ĠTh ose
ram a
Ġperson ality
Ġbe ating
Ġfle w
Ġspons ored
ge on
Ġterrit ories
à ¸
ĠMov ement
Ġr um
l ater
Ġdef ence
ĠA I
Ġten ure
ĠG ill
ĠBel gian
Ġb orders
Ġprincip les
Ġpublic ly
i Ã³n
Ġcomp onent
Ġcl othing
Ġ189 9
Ġ[ [
ĠYork shire
u able
iss ue
ĠHe b
op al
ĠE qu
op les
Ġdiscuss ed
ĠFI FA
h ow
Ġrele ases
Ġreported ly
ĠM aj
Ġprocess ing
ar th
Ġcharacter ized
Ġb ay
Ġcred its
c ell
st ers
ĠD ub
ĠC er
ĠPh oen
Ġsim ultane
Ġdro ve
ĠR ud
9 4
Ġswim ming
ĠW W
Ġcon fer
act s
Ġrebu ilt
ĠG a
z er
ĠTr ade
ew here
Ġn erv
Ġintegr ated
ĠFinn ish
ĠR ico
W est
Ġbroadcast ing
iv ate
Ġsec ured
Ġdu o
Ġw ire
Ġdesc ent
f inal
Ġn urs
Ġdisc ont
ĠD J
ĠB achelor
9 3
oc a
Ġdisplay ed
rup ted
Ġhop ed
p m
ĠC ra
ĠV e
Ġhand le
Ġconstit ution
n ia
ĠMed iterranean
ĠTreat y
as i
Ġpartn ers
ĠS ax
Ġmerch ant
ĠR ol
Ġar c
Ġrel ocated
Ġfeel ings
Ġscient ists
ĠSim ilar
ous es
h our
inn ed
od ed
ĠI an
ĠWork s
Ġcon j
ab il
Ġg ay
Ġsent enced
Ġconvers ation
ĠBangl adesh
Ġconcentr ation
Ġtrans mission
Ġind igenous
Ġpart ly
Ġburn ed
ĠHamp shire
Ġpart ially
ĠT ob
ĠV ancouver
ĠThere fore
ĠB asketball
ĠD ance
Ġfal se
Ġdec ides
âĢĿ .
ĠM ess
Ġcon greg
Ġcons ervative
ird s
Ġg iant
em ed
S T
Ġfor th
et a
Ġfund ed
ĠFr iday
O ne
Ġt ribut
b ing
j amin
Ġd ual
Ġelect ron
ĠTro phy
b ow
ple ment
Ġbes ide
Ġpar am
Ġapp rec
ij ing
Ġn avig
ir i
Ġhigh light
u its
ĠN ord
ĠDel hi
et ers
Ġfac ilit
Ġpers u
Ġf ill
8 4
Ġh idden
ill o
us k
it able
Ġexperiment al
x ual
ĠMuslim s
h igh
ĠCap ital
N ot
Ġcirc le
Ġin put
Ġvol umes
ĠE mer
M E
Ġafter noon
ĠMil an
ĠGri ff
p ent
Ġresear chers
if ies
0 7
Ġj unction
ĠL uther
Ġtre nd
ĠAfghan istan
Ġle af
I D
Ġmay be
ĠW a
ĠUn it
Ġliber al
ĠHun ter
ĠW arner
ĠGirl s
Ġass ets
M L
Ġbene ath
Ġcol ors
Ġpubl isher
Ġf ab
Ġth ir
ĠEv ans
ĠN eb
ark ed
Ġdown load
Ġto t
Ġfl ash
ĠC hel
Ġdec isions
Ġexpl o
f oot
op es
Ġacknow led
Ġab use
ĠLim ited
ro se
Ġwill ing
Ġreve als
Ġsh ift
ĠR ain
8 7
Ġ189 6
er ia
ĠMot or
Ġav o
Ġun less
Ġpurs ue
arch y
Ġp or
Âł cm
Ġb acter
Ġimp ossible
ang le
Ġchar ity
row s
Ġper mission
ĠBern ard
Ġbeaut y
r Ã©
Ġ189 5
Ġsw ord
ĠW ing
Ġf oss
Ġear ning
Ġf inger
2 000
N C
D r
M C
Ġsett lers
Ġd inner
A b
Ġcontin u
Ġm or
Ġorgan ised
hat tan
ĠN am
Ġcan n
ĠGr ay
Ġaffili ated
art ing
Ġintellect ual
Ġsp ell
Ġrep air
Ġcivil ian
ĠGu y
Ġpremi ere
Ġt orn
as p
ĠD raft
iv an
ener ation
ĠR ena
ĠRoman ian
sequ ently
ĠG or
Ġr iding
ĠPlay er
ok ing
ĠG ary
ĠUE FA
Ġs orry
Ġsynt hes
ĠF itz
ra id
Ġrom antic
ĠE nt
ĠWar ren
atter ed
y t
Ġr ated
Ġgener ated
cl osed
un c
ĠF ood
Ġpro fit
ĠL ud
Ġsuper ior
od a
G ood
Ġathlet es
Ġdeploy ed
our se
ĠN i
rep rene
ĠM ort
Ġdismiss ed
ĠH ud
f olk
z es
Ġ1 000
Ġlim its
ĠM ans
ĠE xt
ĠG on
min ute
Ġco at
Ġs isters
Ġ189 7
ĠThrough out
n et
ir ates
Ġret reat
Ġimplement ed
ĠC ricket
ĠDef ence
erb ai
ĠMad rid
ab out
Ġg athered
ot al
f ast
born e
Ġrun ner
ĠP rom
9 1
ĠB omb
Ġc ook
Ġlight s
Ġput ting
Ġexp ensive
ar an
Ġpat ron
z i
Ġhun ting
ix ed
Ġ25 0
ĠC hem
Ġwas te
Ġimmigr ants
h ill
ag re
Ġprov ision
ĠLank a
ĠG rey
Ġcon clusion
Ġ5 4
ĠM uch
0 5
onym ous
ĠBr istol
ip h
le m
it ual
Ġdiscuss ion
ĠMit chell
Ġunder w
Ġb orough
ĠInit ially
arm a
arg ed
ar v
ĠS A
Ġinterp re
Ġ ur
ĠAn y
Ġf ighter
Ġm al
u gh
Ġopp onents
elect ed
Ġfarm ers
Ġlink s
Ġrest oration
Ġterm inal
ĠA qu
Ġsubsid iary
Ġsy mp
ĠFl ore
ĠSe ven
ĠS hip
ug hed
Ġcommun ications
P R
Ġelect rical
Ġanim ated
ob i
Ġinaug ural
Ġess ential
am o
Ġd im
The y
ĠMu hammad
Ġinvol ves
we et
Ġtour ing
Ġc argo
ur ers
ĠL ast
inc orporated
ĠBar ry
ĠDe ath
ĠPark er
ĠH as
ĠStud ents
end ment
ab et
ĠMar s
Ġp ages
ĠHarr ison
f ielder
Ġopp onent
ĠCharl otte
com mun
ĠR and
Ġgr ave
ĠI v
Ġhousehold er
Ġd rafted
Ġs ailed
Ġth anks
Ġpro ve
Ġjud ges
Ġbusiness man
ĠM i
Ġsol ar
Ġconf used
Ġtex ts
Ġcomp ens
Ġcl ock
ĠSe ason
Ġdep ict
eng er
Ġloc ally
Ġla ughed
Ġtim ber
Ġdes k
Ġc emetery
Ġlicens ed
ĠK on
Ġre venue
Ġrare ly
Ġrock s
Ġm ines
az ines
ond s
Ġsh ock
Ġn inth
Ġr andom
ĠSerb ian
Ġdivers e
Ġlist en
ĠCarl os
Ġprovinc es
Ġprincip le
Ġsuit able
Ġfavor ite
Ġbelie ves
Ġn ose
8 2
Ġst im
Ġsust ain
ĠW here
ink ing
m other
ul u
ĠCommun ications
Ġdoll ars
ĠLat ino
Ġs ugar
ĠN HL
ac re
Ġestabl ishing
8 1
ul i
Ġs essions
Ġvot ers
Ġsp ir
sc ale
ul us
end ar
oc ation
Ġexclus ively
ĠM aine
ĠB aker
Ġhel icop
Ġpre st
ash i
ĠS S
Ġ189 3
rehens ive
Ġrel ation
Ã ł
ing ham
Ġlat est
Ġsp in
ĠSc ient
ĠSerb ia
ĠE U
Ġincre ases
ĠN atural
ĠTe le
f ers
Ġwor st
cast le
st ad
ĠEvent ually
Ġansw ered
Ġch ronic
il er
ĠCon struction
Ġtermin us
Ġcons ervation
Ġman if
Ġfocus es
f ish
ĠM other
Ġrequ ested
Ġisol ated
Ġeld est
th at
ĠBook s
ig hed
ĠWay ne
Ġ188 9
Ġpattern s
z ant
Ġre aches
Ġunsuccess ful
Ġr ib
ap se
Ġcomple ting
Ġto ol
Ġinit iated
ĠF alls
f low
ĠMan hattan
8 3
ĠF ine
ĠArab ic
id al
res ident
Ġlif ted
ĠM all
ug s
Ġexc av
Ġt ill
at on
Ġviol ent
ĠA S
Ġcat tle
Ġconnect ing
ant ed
Ġ5 3
est y
ĠG mina
Ġs ang
ĠAl ice
up er
ĠSt ory
Ġthro at
ĠFurther more
ĠBe ijing
T E
ĠIn s
b les
Ġdr ummer
ĠR abb
ol ar
ĠAz erbai
ag ar
Ġmark s
Ġarg ument
Ġesc aped
str ong
Ġwithd rew
Ġr ig
Ġf itted
oc c
ĠT an
ĠM ason
Ġs alt
gor ith
Ġknow ing
Ġv ul
ĠA rena
Ġ" ",
ann ah
ĠF ace
Ġf aces
ĠCons erv
Ġaut onom
Ġp od
Ġwh atever
Ġ189 2
Ġlow est
b at
Ġhous ed
j ab
ke e
ĠS id
Ġdemonstr ated
Ġim perial
Ġunderst ood
Ġtrad ed
Ġqual ify
Ġscholars hip
Ġshop ping
ĠT ogether
ĠZ one
ĠAd ela
Ġsub t
Ã© n
Ġarrang ement
Ġiniti ative
Ġ188 5
ĠAtt orney
ĠOrgan ization
iv ia
m o
Ġ18 50
ĠR angers
ĠGr ade
Ġtrad itions
ĠRoman ized
Ġl oud
Ġover s
Ġassist ed
ĠCarib bean
Ã¶ r
Ġegg s
B M
Ġ189 4
3 00
ens on
0 6
ĠClin ton
Ġwealth y
ĠB urg
u ction
Ġpract ical
arri ors
b ul
Ġhe ir
ĠM ak
rou d
Ġbelong ing
Ġche ek
Ġw ore
un ct
ĠSte el
Ġm erc
ĠSal v
ĠPers ian
ĠR est
Ġ5 6
h um
Ġsub stitute
ĠK now
ĠTh or
ĠEconom ic
Ġide al
ĠS eb
ĠM embers
Ġelectric ity
Ġtw in
Ġcons cious
it ely
Ġst em
ĠCl ar
ash words
h t
ĠOr ange
ĠBen jamin
Ġgu ests
ĠB aptist
Ġhor ror
Ġthere after
ĠRec ord
Ġpark ing
Ġcontin uous
Ġg olf
Ġcon fess
ĠRe form
ĠC arr
Ġan alog
Ġem igr
inent al
ang ular
umb ent
Ġmarg in
Ġhel ps
Ġl ad
ĠJ ama
I L
Ġsh arp
ic ts
ancell or
Ġindic ates
ĠC art
ĠN ear
gr ade
Ġprefer red
Ġent hus
Ġre ct
Ġt anks
Ġall iance
ĠB ox
Ġrad ical
Ġstrateg ic
ol en
Ġchar ter
Ġstreng then
Ġev ac
Ġgu ide
ĠCommission er
Ġun like
ash a
ĠG oth
ens is
Ġdisp ute
Ġcoal ition
Ġhonor ary
av i
room s
Ġvict im
Ġst om
ic ing
Ġpl ain
Ġmerg er
Ġon going
S m
Ġdev oted
Ġb oot
arri er
ro ph
Ġcoach ing
ĠNich olas
ĠT ol
Ġbound aries
Ġtreat y
Ġbl ind
ĠG un
ĠPr incip
B r
Ġcamp s
le b
ĠNiger ia
ĠSing les
Ġinterest ing
Ġlab our
ĠK an
ĠIs a
Ġ els
Ġmach ines
over e
Ġdomin ant
Ġp ip
Ġal ter
ten se
Ġreg ulations
Ġtrav elled
m aking
R S
Ġg ift
an ing
Ġf ault
ib ilities
ĠAss istant
Ġ189 1
Ġoper ator
Ġminor ity
Ġdec k
le ep
ĠR ic
n ik
Ġsub mitted
Ġf aster
ĠD h
Ġg ross
Ġab st
ĠGre ater
Ġmag azines
uk i
Ġme at
Ġl ying
Ġbirth day
ĠTr inity
Ġem peror
qu ir
Ġsym pt
el ing
Ġind ex
ĠB ra
raf ts
ĠV erm
ag ers
Ġmechan ism
ĠAll ied
Ġels ewhere
Ġsl aves
Ġsculpt ure
ĠCent ury
ĠG et
f ly
D C
Ġsurpr ised
ĠPar ish
ann on
ĠApp le
ic le
ĠP sych
c ribed
Ġ186 5
ĠPhoen ix
ĠHawai i
Ġconcern ing
Ġ188 8
ĠBeng al
Ġv s
Ġpro sp
l ar
ĠPro p
Ġser ial
pl ed
Ġorigin ated
Ġfor ty
Ġp ill
ĠT ib
now iki
Ġnob le
st ance
ĠAbb ey
Ġintern ationally
Ġcr imes
Ġfif ty
Ġmunicipal ities
Ġr itual
m n
ĠO bs
ak ia
ĠF err
Ġrecogn ised
Ġun incorporated
ĠSy ria
0 1
Ġmon astery
Ġsurv iv
Ġmechan ical
Ġst ared
Ġexerc ise
ĠC ry
y gen
Ġgrow s
ep hew
ĠDe ad
az ing
Ġsh ield
Ġgr av
ĠK um
Ġdis appeared
Ġm ac
Ġacc ord
Ġ ;
Ġgu arant
Ġ186 4
Ġinform ed
ir ts
ĠChrist ians
Ġdeliver y
Ġfall en
Ġconf ig
ĠR acing
ĠB ron
Ġdiscont in
ĠS C
ĠStand ard
ĠT un
ĠCult ure
ĠS ection
Ġlocomot ives
Ġt ong
ĠGu inea
ĠN ation
Ġor chestra
ĠTr ump
Ġmanufact ured
Ġconvent ional
ĠGr ace
Ġcom ed
Ġfe e
Ġ186 1
ĠCur rently
Ġal gorith
st ery
ĠS ultan
de f
ĠBr anch
Ġre duction
Ġjurisd iction
Ġkey board
ĠCl ay
Ġearth qu
Ġst uff
w inning
emb le
Ġconnect ions
N S
Ġphys ics
aj a
on ies
ĠJon athan
ro id
et on
Ġd iver
ĠTurn er
Ġtradition ally
L S
c are
Ġdepart ed
Ġproduct ions
Ġshif ted
Ġbat talion
Ġfun eral
ir k
Ġorgan is
ĠBy zant
Ġ err
is p
Ġprom ised
ĠAdela ide
Ġf ulf
Ġtri als
ĠN athan
ĠFr ances
Ġr id
ĠBroad casting
ĠIran ian
Ġk m
Ġvent ure
Ġsettle ments
ur u
el ed
Ġattempt ing
ov en
Ġpass ion
Ġphotograph s
Don ald
Ġprom ise
Ġsignific ance
Ġt ub
on ed
Ġdr ivers
Ġb anned
Ġrespect ive
ĠM es
Ġindust ries
ĠPen insula
Ġactiv ist
Ġtemper atures
g ate
Ġpl acing
ĠShe l
Ġh ide
Ġmanufact urer
Ġstri p
ty pe
ĠW ang
Ġb oss
ĠI van
ĠJ azz
m its
tr ans
ah a
s a
ĠI C
Ġextens ively
iz z
in os
Ġelig ible
Ġdoub les
ĠL ore
ĠC A
Ġident ical
g roup
ĠV el
ĠMicro soft
ĠUnivers al
ier ra
medi ate
Ġcanc elled
ĠCub a
Ġlay er
Ġ9 5
Ġcond em
Ġfest ivals
Ġj ury
ames e
ĠGr an
ĠC H
Ġexcell ent
Ġpric es
Ġp ush
ĠC ob
Ġw orn
ĠOl iver
ĠE ug
ĠW as
op p
um ps
ĠTra il
Ġ186 2
Ġed itions
ĠP ad
Ġra ising
Ġgen etic
Ġreb ell
Ġbelong s
iet h
Ġconvinc ed
Ġt ens
Ġorig ins
0 4
Ġnegoti ations
Ġkid n
Ġn am
Ġ6 00
ĠM ales
Ġprop ag
au ge
Ġstr ange
is hers
Ġno ise
Ġeff icient
Ġ186 3
ĠM A
Ġwid er
Ġoverse as
Ġphot ography
Ġacc eler
Ġcon gress
Ġsend ing
ĠPr adesh
ĠS r
J ust
Ñ Ģ
enc er
Ġpromot ing
ĠM aced
ol ia
Ġp y
ĠArch bishop
Ġinflu ences
Ġsh irt
ĠSp irit
Ġrest ricted
Ġenem ies
Ġtrans mit
Ġout standing
ix on
ĠVinc ent
ĠH ope
Ġatmosp here
Ġ188 7
Ġn ut
app y
Ġexpl an
ack et
ĠMon te
ĠN S
Ġclin ical
ĠH ig
Ġc ave
W hen
Ġwrest ling
ĠD om
ĠSt ill
ortun ately
Ch rist
Ġdr um
ĠS ign
Ġgrab bed
G u
Ġwarn ing
t wo
Ġt ies
f amily
ĠC ad
20 10
Ġmanag ing
ĠHud son
Ġplayoff s
ĠYear s
Ġk ids
Ġexpl ains
Ġlegisl ative
Ġfl ights
Ġind eed
ĠAd vent
Ġj u
b es
over ed
Ġl ibr
Ġphot o
ĠK os
Ġrel ie
ĠBr isb
Ġunivers e
Ġimplement ation
Ġexhib ited
Ġcon ven
Ġconstit utional
m aker
al g
Ġr anging
ĠYou T
ĠC atherine
Ġsc r
ĠI ce
ĠJ un
Ġex ha
an im
oth y
Ġthe rm
Ġcoll aps
ĠBrisb ane
Ġdef ended
ett a
ĠKir k
Ġdrink ing
ĠN ar
Ġm ask
ĠPer u
Ġh ole
Ġcinem a
enn ial
ĠAlbert a
Ð ½
elt a
ĠW or
Ġw ard
Ġsus pect
Ġlin ear
p ower
ĠN et
Ġconvers ion
Ġev olved
w as
Ġwind s
Î ½
ol ition
Ġt ag
ĠElect ric
0 3
ort ion
Ġmurd ered
Ġ5 7
Ġprepar ation
let t
ĠComm ons
ĠC inc
ĠD aily
ĠE ston
Ġcertain ly
work s
ip per
Ġre organ
Ġinterview s
Ġarr iving
Ġrem ote
Ġdist urb
u art
Ġopt ions
ĠJ erry
Ġst eep
Ġrec alled
ach ment
Ġh ills
p re
f our
yl er
ist ing
Ġex clud
former ly
Ġemot ional
or ious
ley ball
Ġab oard
Å ¾
Ġaccess ible
Ġcoin c
Ġpup ils
ond er
b led
Ġbut ter
ĠT ak
E d
ĠStud io
Ġd anger
ĠFre edom
Ġac res
Ġ6 6
ĠBar cel
om ic
ĠHeb rew
Ġre pr
Ġb ases
Ġun com
Ġsc ores
Ġw er
ĠCom ple
Ġt ons
Ġsl ave
f eld
fam ilies
Ġmom ents
en berg
ĠPier re
l anguage
ul ous
ĠMun ich
ĠProtest ant
Ġtop ics
Ġdem anded
arr ison
Ġcolleg es
Ġgold en
Ġcampaign s
Ġsh ops
Ġdist ribut
Ġf asc
ra ud
ĠS ad
Ï Ħ
ĠSpr ings
Ġacqu isition
el i
Ġsusp ic
vent h
f ree
Ġparticip ating
ie v
ĠCl are
ĠMas ters
it ime
Ġm oral
Ġbat tery
Ġcap s
W A
ĠBarb ara
ĠWrest ling
Ġg ast
im p
Ġcan al
ĠC ase
Ġintern et
Ġâ Ĥ
g ame
Ġdescrib ing
ĠBes ides
ĠCra ig
Ġbi ological
ĠColl ins
iss ions
c ient
Ġmain stream
Ġaff air
ĠAng lo
ĠDemocr at
ar us
Ġcat alog
ĠLl oyd
Ġdep ression
cel and
Ã Ł
ĠAt hens
ac o
Ġinher ited
Ġexp osure
est on
Ġass um
Ġy ard
Ġneut ral
ĠSocial ist
er ior
Ġsw itched
ĠV as
ĠC P
os y
mon th
re leased
ĠN av
Ġ188 6
br id
f a
ĠT ang
nd a
ĠF isher
Ġcontribut ing
Ġcr uc
ĠSoc cer
Ġg ear
ĠT u
inn ati
ĠPhilipp ine
ĠF act
Ġenroll ed
Ġprot ests
ĠL ate
at ar
Ġpers pective
ĠNov a
Ġunc ertain
Ġsub sc
Ġ5 8
Ġg al
ourn aments
ĠYouT ube
Ġspecial ized
ĠL ad
Ġpet ition
as hes
Ġconv icted
Ġt ip
ĠPun jab
elf are
ĠCont rol
Ġprote ins
h aw
Ġfarm ing
Ġag es
ĠF ab
ad ers
Ġres umed
ĠM alt
ur st
ab a
Ġex ecution
ĠSer ge
ĠP ant
Ġtrib ute
Ġa qu
ĠU g
ĠAl aska
Ġmeas ured
Ġdem ands
Ġb ench
Ġtick et
Ġtax es
ract ed
Ġo kay
ue z
v i
Ġbare ly
Ġinsp iration
sc ar
hol m
Ġfriend ship
ĠCo al
Ġs av
ĠM ind
ĠLe eds
ĠDemocr ats
Ġ188 1
Ġbel t
Ġdat ab
A re
ĠSym phony
Ġn ephew
od ore
ĠBul gar
Ġout break
ĠB ey
Ġdis ch
Ġlocal ity
Ġb ull
Ġhead ing
out heastern
Ġrep orter
Ġfund amental
ĠL P
Ġpl astic
ĠR AF
Ġcorrespond ing
Ġn ice
ol ve
ĠRe f
Ġ8 5
Ġreport ing
Ġshould ers
ĠC O
Ġper mitted
Ġm os
ĠGl en
Ġs in
ĠMunicip ality
Ġvis its
Ġdecor ated
anc he
ĠB eth
it is
Ġ7 2
le e
M on
Ġc ow
ĠB arr
ĠC ode
Ġport rait
0 2
ĠA ber
Ġaff ord
Ġarr ive
Ġd iet
uk a
Ã¨ re
v ision
Ġ188 4
ic ity
he nt
ĠBr and
ounc ill
Ġcooper ation
M I
Ġ5 9
Ġcop per
E ng
i ya
ĠV I
e ing
Ġstom ach
ĠP il
ĠAl t
Ġdifficult ies
G erman
Ġgradu ation
r ane
Ġbeet le
Ġcollabor ated
ip er
g ments
oy s
ĠU nd
Ġresign ation
Ġdesign ation
ĠG ard
Ġh ang
ĠSm all
Ġver tical
b us
Ġpow ered
Ġwor se
Ġcarri es
om on
Ġs ample
og le
Ġd ressed
raz y
Ġc a
ĠC elt
Ġcert ified
ap ing
ĠNor folk
ĠFor mer
Ġexclus ive
ĠChristian ity
ĠBarcel ona
Ġc avalry
ĠTig ers
or ic
Ġinduct ed
it arian
Ġro ot
Ġcolumn s
Ġdifficult y
ĠColomb ia
ĠF if
ess ed
ĠCinc innati
Ġinterpret ation
iss a
ris es
Ġserious ly
Ġpro of
l ength
ĠPh D
Ġfilm ing
Ġrece ption
Ġaware ness
Ġrefer ences
Ġc yl
Ġf ro
Ġdist inction
ĠBuff alo
ĠTerrit ory
ĠS ig
ĠSec ret
ific ial
R I
ĠChall enge
Ġin tense
Ġ8 00
Ġdep icted
ĠL ag
ĠH em
Ġg aze
ĠAd miral
Ġge omet
R T
Ġyour self
Ġc ock
Ġsimultane ously
Ġl ip
ĠPict ures
Ġdis b
ĠL is
Ġfram ework
ĠRep ort
Ġal ien
Ġhe nce
Ġgall ery
ĠNe g
Ġf ighters
Ġcomp ound
s ub
Ġb ell
ĠC amb
Ġchalleng es
Ġtarg ets
ow ski
H z
ay ing
ĠSt ars
ĠW es
ĠR idge
e le
com pass
Ġcontrol s
Ġphr ase
ĠS aints
id o
Ġdet ect
ĠOb ama
ĠV lad
Ġin hib
ĠBob by
20 11
Ġst ick
Ġst ops
ĠI celand
Ġcomm enced
Ġqu een
Ġmer ely
Ġaccomp any
Ġm ad
ĠDak ota
ĠF ull
ĠBl ues
Ġdepart ments
ĠCult ural
Ġag g
Ġsh aring
Ġang ry
ĠVeg as
Ġv el
ĠK ap
Ġlik ed
ĠSh ar
Ġent ers
Ġgr ades
Ġang le
ĠProv inc
ĠArmen ian
ĠR oll
Ġdistinct ive
Ġcap ita
az on
4 00
Ġc ir
ĠSa udi
Ġ( ).
f ront
Ġinter cept
Ġrece ives
Ġw aves
Ġeas ier
at ers
av id
ĠT erry
ĠSpe ed
ĠSystem s
ĠH amb
Y eah
Ġinst ruction
Ġrele vant
Ġsequ el
Ġsum mit
ĠRog ers
Ġl ingu
ĠMay be
Ġm aps
ĠM om
ig o
ĠG ate
Ġwrit ings
Ġreleg ated
Ġp seud
Ġ188 2
R O
ĠB ak
Ġup set
ĠT ech
Ġte a
ĠB orough
Ġt ears
ber ry
os oph
Ġprep are
ĠM S
ĠBudd hist
Ġamb ass
ĠBr ight
n an
ipp ing
200 7
Ġre vers
ad ition
200 8
Ġsk i
Ġautom atic
Ġmin i
Ġsk et
Ġinh ab
r ain
ster dam
ĠMunicip al
Ġb one
art ed
Will iam
ĠA ction
Ġdeep ly
Ġcross es
ĠConfeder ate
Ġbre ast
re z
Ġhistor ians
al an
ĠNap ole
Ġsil ence
B est
ĠDig ital
ĠS oph
Ġcoin s
Ġpe oples
Ġs ung
ĠUr ban
re ts
ĠNev ada
ĠAd vis
Ġm ilk
ĠR ot
Ã ª
Ġcut ting
Ġhy per
Ġdram atic
Ġp ressed
ĠPer ry
oin ted
rop od
ol ves
Ġfin ance
Ġfe els
ra its
Ġres id
ĠAl ban
Î ¿
Ġcons olid
Ġg entle
ĠJeff erson
ach i
ĠR ing
ep s
ĠDi ocese
Ġus age
ĠProfess ional
ose xual
Ġemphas is
Ġel abor
osp el
ĠS now
ond a
Ġcharacter istic
Ġobject ive
ĠR hod
Ġfab ric
ĠDen ver
er as
ch ild
ĠHel en
Ġtor ped
Ġent reprene
ĠD iam
È Ļ
Ġ9 9
ir ms
ĠBl ock
Ġquarter back
ĠSt orm
al am
Ġphys ician
? âĢĻ
ĠY ang
Ġde emed
Ġb achelor
Ġr hythm
ĠR al
Bl ack
o ons
ĠB ath
ĠMin or
ĠR ac
Ġs oph
ath on
v ol
Ġl ady
ĠM ult
ĠAnt ar
Ġre ward
Ġsubmar ine
ĠL iving
g arian
osp itals
ĠCirc uit
Ġen compass
iv ic
Ġs ad
Ġcarri er
ĠCom ics
ĠArgent ine
ĠIndust rial
Ġpro l
Ġrecover y
Ġz ero
Ġt ournaments
ĠR u
Ġre ducing
Ġrel ax
Ġspe aker
Ġcomp rises
ĠKe ith
ĠL en
F F
Ġrestaur ants
or p
ĠS ah
H A
Ġd ancing
Ġne uro
Ñ ģ
Ġt enth
Ġcle ared
Ġbehav i
ĠPl ant
Ġloc k
for ced
200 9
unn y
Ġval uable
Ġas h
v et
gh ai
Ġp airs
Ġcompar ison
ĠQ ual
ĠSur vey
B O
Ġm ail
af e
Ġsympt oms
Ġsuppl ied
ĠJ a
Ġtong ue
ĠNep al
Ġt ested
Ġfor cing
Ġlegisl ature
ĠClass ic
Ġattend ance
en os
Ġattack ing
ĠS ony
d isc
Ġess entially
ĠCh i
ĠM az
ĠNew castle
Ġdog s
ĠC old
Ġcou p
Ġ error
im ir
Ġor n
Ġindic ating
Ġamount s
ĠHu gh
ĠRob in
Ġtechn ologies
ĠG round
Ġelement ary
Ġm amm
Ġsp ots
or o
Ġun n
Ġcoll apse
ĠB ert
Ġtalk s
it ic
Ġnarr ative
ĠBl ood
ĠC S
ĠP ay
ĠC urt
Ġprom in
Ġne arest
Ġcomp iled
Ġdr ums
Ġtravel ing
Ġdiplom atic
Ġant icip
Ġtr uly
ĠJ oy
Ġpart ial
Ġas ide
ling ton
ĠDr ive
ac les
ĠC hester
Ġt u
Ġinter change
ĠMond ay
Ġcl an
Ġpredecess or
vel t
Ġg ardens
f ive
Ġdes ert
Ġpo ison
p op
Ġco ached
ĠN ext
ĠT ag
Ġtour ist
Ġsc en
Ġdisb anded
stit utional
Ġen forcement
Ġmin istry
Ġ188 3
Ġv amp
y cl
Ġfl ank
Ġover w
ĠMod el
r aska
og g
writ ten
Ġf lex
ĠKen ya
P ar
Ġgu ards
iff s
ick ed
Ġj ail
ĠComp et
Ġhon ors
n ew
ou ch
oc ent
ov ich
ĠGab riel
ĠFr an
ĠE sc
Ġab ilities
tt p
Ġl es
c ia
Ġend ors
er ic
Ã ¦
ĠIn sp
ĠL ions
all ing
Ġs iege
Ġass ists
Ġappro aches
D ec
ans k
ĠFac ulty
s ong
ĠMag n
el ia
r av
ren cy
ĠR ivers
Ġbrig ade
ĠIndust ry
ĠF em
Ġreflect ed
ik o
Ġdis aster
ĠP ack
Ġsc re
ĠAzerbai jan
Ġcl ar
Ġ187 6
Ġh orn
Ġdescend ants
ĠSus an
Ġwor ry
Ġth ank
Ġout door
ĠC N
Ġbon us
ĠSt re
vious ly
il ia
Ġtempor arily
en ia
Ġann ex
200 6
Ġg if
Ġrecip ient
ish ops
Ġdiss olved
ĠS ic
ĠH om
h or
Ġpred ict
Ġ187 1
Ġord inary
Ġph arm
ĠE lement
ĠHar bor
w ings
Ġ6 2
Ġburn ing
Ġex it
Ġg ap
Ġb ats
Ġdise ases
ĠAm sterdam
ĠHol land
E N
Ġw ake
aw s
abl ished
Ġremov al
T o
Ġwid ow
ific ate
ke ley
ĠWars aw
ij i
Ġorgan ic
em pl
iz er
Ġaf raid
Ġvari able
ĠO m
ĠPol icy
Ġhor izon
ĠNever theless
Ġvolunte ers
w ig
ro d
ĠK ath
à ®
Ġor ange
rib le
Ġcom ments
ĠW ed
Ġcitiz en
ĠB ot
Ġexper iments
ĠCroat ia
ĠEth iop
av or
Ġpre v
et ary
ĠSe an
ĠM end
Ġan ger
Ġext inct
ĠMad ison
Ġpit ched
Ġgl anced
ĠB ased
Ġeconom ics
ok es
Ġt um
Ġarr ives
Ġmid fielder
l ia
Ġmonth ly
hel m
Ġroll ed
at us
ĠEx per
ĠMor oc
ces ter
ĠH ob
Ġhop ing
ĠB uch
our t
J an
ĠEd wards
ĠS alt
ĠHistor ical
Ġrefer ring
Ġvul ner
em ploy
Ġdeal ing
ĠW oman
ĠMur phy
ull ivan
Ġaltern ate
Ġcomp rehensive
Ġ" [
Ġrif le
amp a
Ġtrav els
ĠC inem
200 5
Ġsem if
ĠA aron
ann i
ov ing
Ġthe ories
ĠCam eron
Ġdel iber
Ġbus es
ĠS ide
ĠK ay
Ġmy ster
h is
zy me
Ġconnect s
Ġimpro vements
Ġrecogn ize
Ġreg ul
ĠB rew
Ġstud ios
ĠL ock
ĠPeters burg
Ġ6 3
Ġkilomet ers
ĠSh aw
ĠP S
l og
Ġspeak ers
Ġexpl icit
ĠHit ler
we ek
Ġconsist ent
Ġgr an
ĠSong s
imens ional
g om
âĢĿ ,
Ġfail ing
Ġdel ayed
Ġj ew
ĠB av
Ġto x
en burg
p ow
Ġrul er
Ġnickn ame
Ġbus y
Ġconsid ering
ĠC ov
Ġpro x
Ġrec ur
Ġp ian
Ġfe ud
Ġcollect ive
Ġg host
Ġcor ps
ĠCost a
Ġle aned
Ġ184 0
ĠY ale
Ġinc umbent
Ġman ip
Ġsc ope
Ġox ygen
w er
Ġkn ee
Ġm asc
Ġdes per
id ad
c at
it ated
ĠSte ven
ĠB ald
ĠV ideo
ĠEm ma
Ġlog o
ey er
Ġco aches
Ġ187 8
E P
Ġfl our
Ġbeat en
ĠT on
Ġbr ings
Ġtherap y
Ġh ind
ĠR ight
Ġreg ister
ĠG ot
ĠPolit ical
Ġunder graduate
tt ps
it ary
Ġread ers
ĠL ion
ĠNe il
ĠI T
re ction
Ġbank rupt
i ast
Ġhistor ically
Ġm oon
s er
st own
Ġclos ure
Ġc raft
Ġcomput ers
Ġcor ruption
ff ield
Ġp ink
Ġper mit
W ho
ĠNeb raska
ot ion
Ġst ake
ĠSt uart
ab e
Ġelev ated
Ġaffili ate
Ġv oy
lev ard
Ġpr ince
Ġproced ure
Ġfr ustr
Ġf iring
ĠAthlet ics
ĠP ic
Ġsk ill
ĠGi ants
Ġpros ecut
" '
ĠM ann
Ġt ours
forman ce
ĠPlay ers
Ġf iles
ĠVen ice
ĠD id
Ġnam ely
Ġb orrow
ic ular
Ġem br
l ain
an j
ind ed
our g
Ġn est
pe are
Ġn at
Ġch rom
b ie
Ġfair ly
20 12
Ġchalleng ed
Ġrecru ited
Ġret ain
Ġlif etime
Ġvocal ist
Ġover t
Ġver se
Ġvar iant
Ġpay ment
Ġsusp ected
Ġch oir
Ġcal m
ĠAl ger
Ġgr ap
ĠS ierra
Ġexhib itions
Ġexhib it
Ġbre eding
Ġdis m
a ft
ĠGh ana
ĠS P
ĠAng lic
D F
Ġveter an
Ġ" (
Ġwa ited
Ġl ift
ĠTechn ical
Ġthir teen
ĠâĤ ¬
Ġd ict
Ġ" ".
Ġstrugg led
ack ing
am pton
Ġw ound
Ġ186 7
M e
Ġpost s
ĠAb raham
akes peare
ĠPr inc
ĠY e
ĠMah ar
ĠChap el
Ġconsum ption
Ġstrong er
ose velt
Ġorganis ations
Ġse eds
ĠP ont
Ġsitu ations
Ġadmin istered
Ġpark s
Ġthere by
Ġcontract s
et r
ĠFlore nce
Ġsol utions
Ġor chest
Ġhol iday
Ġc ounsel
includ e
ĠGreg ory
ĠAb u
Ġcasual ties
ur ated
Ġ187 2
Ġrad ar
ĠL an
ĠT as
ĠL arry
Ġacc um
Ġall ies
he ld
Ġcolle agues
ok er
ou stic
Ġab olished
Ġcl ient
Ġsign als
ĠOr d
ĠGon z
Ġcur ric
Ġrat ings
u is
ag ger
Ġ187 5
ĠLu is
ĠWith out
Ġ6 1
c ore
ĠOtt awa
Ġadd ressed
Ġres ort
ĠB und
Ġb ars
Ġd ying
anc ial
L ove
ĠBul garian
ĠL iga
Ġflow er
ĠCamp aign
Ġconsum er
w ord
ag ons
Ġp ole
Ġcelebr ation
ĠZ e
ant a
Ġr ice
Ġlabor atory
ĠE ight
Ġbr idges
Ġlo op
Ġwhis pered
th rough
ĠHer bert
agon ist
ft en
Ġple ase
ĠLeban on
Ġs overe
Ġinstall ation
ĠI P
Ġr is
ĠBulgar ia
Ġper ceived
isc opal
Ġ187 9
Ġhyp othes
Ġt aste
Ġ9 8
Ġcl ients
ĠV ers
ĠPear l
in us
ub s
Ġscient ist
yr ight
Ġsh orter
Ġfocus ing
Ġcab in
red ited
ĠL ear
Ġst eal
Ġ6 8
ĠS oul
Ġadj ust
Ġbl ank
Ġtrans p
ĠLuc as
Ġconf idence
G eor
ĠF u
ĠK rist
Ġcal endar
Ġaim s
art s
if fer
ĠSy rian
reg ular
ĠS z
ĠUl t
om ed
E L
Ġaccur ate
Ã¶ n
Ġpat ent
ĠEd die
ĠG ay
rim ination
le ase
Ġinf l
Ġor bit
k ov
ĠH erman
Ġ7 6
ur se
ĠH av
Ġimprison ed
Ġprevent ed
exp ected
is ons
ĠDel aware
Ġemp ire
, âĢĻ
ĠD ennis
am ics
Ġinter action
Ġprof ile
ĠForm ula
ĠSup port
Ġcare fully
Ġf antasy
ĠE y
Ġbe er
Ġaccommod ate
Ġdocument ed
Ġt ape
ĠRo osevelt
Ġsup plement
Ġcompos itions
orig inal
C D
Ġst ones
Ġgrand son
in f
Ġare na
st s
Ñ Ĥ
ĠTy pe
Ġachie vement
Ġ9 6
Ġextend ing
ĠM ul
Ġe ating
Ġ6 7
l ist
Ġf uck
Ġprogram mes
ĠT ed
as m
Ġ8 2
Ġaggreg ate
Ġreve al
Ġfour teen
Ġsix teen
Ġst ored
ĠHen ri
Ġg aining
ĠCroat ian
ĠK ate
Ġmix ture
ĠJ ake
ĠFil ip
Ġmaintain ing
ĠEx change
ch ief
Ġact ively
ĠTib et
duc es
l ane
only include
Ġ186 6
Ġback ed
ĠM ol
n Ã©e
ĠR at
Ġsh ots
l ights
ok a
Ġgener ations
Ġpe er
un ning
B ig
Ġ186 8
Ġpredomin antly
Ġqu ad
Ġtele phone
ĠP in
Ġchem istry
it ting
Ġab und
" |
Ġpolit icians
Ġto ler
ĠâĢ ¦
ĠMal ay
Ġl ung
m ade
Ġf ib
Ġreform s
ĠHug hes
Ġmem or
Ġprison er
Ġland mark
ĠBer keley
Ġren owned
Ġneighbor ing
Ġex ch
Ġ á
Ġf ame
Ġarchae ological
Ġgu ys
ĠPro duction
ant i
Ġs id
Ġbehavi our
Ġprest igious
.. ."
Ġconc ur
Ġstruct ural
Ġl akes
Ġpregn ant
it ro
Ġ187 4
ĠE sp
Ġfunction al
p ost
Ġt ube
ĠNot e
j oin
ĠS uz
ĠO pp
ĠCo ach
ĠC ond
ĠO il
Ġfoot age
Ġperson ally
ĠHe avy
Ġto mb
Ġ187 3
Ġt iny
Ġsurre nder
ĠR ange
qu is
Ġclos est
Ġbas in
Ġb in
it udes
ĠShan ghai
Ġdef ender
Ġgu id
ĠGo ogle
ĠHamb urg
Ġsust ained
Ġret iring
Ġarg ues
Ġmain land
Ġconcept s
p ine
ĠPed ro
ĠG am
Ġviol in
âĢ¦ âĢĿ
Ġg ymn
199 0
Ġathlet ic
ĠF a
ĠByzant ine
ĠGu ild
Ġal ign
Ġre ver
Ġbroadcast s
Ġun w
ĠP ast
Ġsp ac
Ġr abb
ĠGram my
ĠLe o
Ġart ificial
Ġhard ware
w right
ĠBeg inning
ĠWell ington
Ġc iting
à ¥
Ġearthqu ake
ĠShe ffield
uck land
ĠS Ã£o
Ġdo zen
ĠTre as
Ġcont ribute
ĠVenezuel a
A nt
Ġle ather
Ġp ap
Ġdest ination
or ge
ĠL ux
Ġer up
ĠIndepend ence
Ġcrop s
ĠP el
ĠR ou
r us
wh ite
Âł Â°
Ġre ass
bo at
ist ent
Ġrev ised
Ġpack age
ĠFin ance
Ġpr ayer
ĠTw enty
Ġstat ements
Ġgen es
ĠBut ler
Ġb arr
p iece
ĠGuard ian
ĠGil bert
fect ure
ĠM ath
Ġair line
Ġcat hedral
Ġac ademy
writ ing
Ġfast est
ĠH unt
Ġs hed
Ġimpro vement
Ġvar iation
ĠA x
Ġfew er
ĠSo ft
ch t
m ail
p ic
ĠStan ford
Ġextend s
ĠSh akespeare
Ġeng agement
Ġsusp ension
ĠD anny
ĠY am
is an
Ġdivor ce
Ġcul min
Ġen zyme
Ġleg it
C om
Ġcult ures
ĠHor se
ĠS outheast
ĠTom my
Ġemploy ee
Ġwork er
Ġsl ight
Ġ187 7
ult s
Ġh aven
s or
Ġf ate
in ery
oc al
Ġeng age
Ġvict ories
ĠD oc
c aster
Ġpres erve
Ġeff iciency
Ġrepeated ly
ĠR ace
Ġboard s
ĠO ri
Ġrel uct
Ġbar rel
o j
C S
Ġsh out
St ation
ac co
uss ia
Ġconf usion
Ġreal ize
ĠAm bass
Ġlocomot ive
ĠL anguage
Ġro ster
Ġvirt ual
am ation
h in
ĠM TV
Ġspok es
arter ed
ĠOper ations
Ġreserv oir
ĠSeb ast
as ia
or ient
ĠSom ers
Ġinvestig ate
ag ram
ĠWall ace
200 4
ĠW ells
ĠM ig
ĠRal ph
Ġ6 9
Ġprin ting
Ġl iv
Ġbreak s
ĠMar x
Ġm oll
ĠProt ection
Ġtour ism
ĠProduct ions
ĠLa ura
Ġdispl ays
Ġconcentr ated
in ted
Ġbe am
Ã¼ n
sec ond
Ġpay ing
Ġp ocket
Ġf raud
Ġg est
Ġloc ked
Ġsm art
l ined
al ign
Ġre verse
Ġkn ocked
ĠCol leg
Ġcolon ies
ĠR av
lim inary
ah o
ĠWat son
Ġback ing
ig ation
ĠAlbum s
ĠM ills
om as
arri or
W here
ĠC ork
g ie
ĠB ass
Ġ8 8
te am
Ġav iation
Ġth rown
Ġcut s
ĠB ird
ĠSc ar
Ġg auge
G o
Ġcounter part
Ġmotor cy
Ġfollow ers
ĠO cc
Ġsc ream
ĠMan uel
im m
Ġadvent ure
n amese
ĠT oy
ge bra
Ġ184 8
ĠEag les
Ġpres ents
ĠHar old
ĠA uckland
uc ed
Ġh ook
ĠNash ville
Ġqual ification
Ġsam ples
á º
ĠC ou
ĠYugosl avia
Ġequ ation
Ġship ping
d ist
Ġgl ac
Ġt rem
Ġbad ly
ĠNew ton
Ġpil ots
Ġtouchdown s
iz ard
Ġp ace
Ġb rew
ĠPrim ary
te gr
ĠR achel
Ġunderw ent
Ġdiscontin ued
Ġt issue
on ial
Ġexam ination
h all
Ġdial ect
ie g
Ī Ĵ
min ster
Ġalt itude
if ier
rid or
r ary
spe aking
T e
Ġbro w
ĠCru z
ĠS ut
S outh
Ð¾ Ð
20 13
ĠP rest
Ġgirl friend
Ġmess ages
Ġpione er
Ġdis order
ĠA my
N ov
c ott
av ian
Ġred es
V P
Ġle agues
Ġindepend ently
ĠT ow
ĠJ erem
ĠP ut
Ġdr ain
Ġd ri
gom ery
Ġven ues
Ġbl og
Ġinstit ute
Ġencour age
Ġc otton
Ġport ions
ĠMethod ist
ĠT erm
A ugust
ĠB ened
ĠN y
ĠS ay
Ġtask s
Ġtheat rical
t ar
Ġin ject
Ġdiscover s
Ġ7 7
ĠTh ai
re ated
ĠJ oint
Ġman ages
Ġrel ating
com p
Ġmem ories
l ived
Ġstation ed
Ġimp ressed
Ġencounter ed
Ġbomb ing
ĠPalest ine
ĠG ust
Ġrefuge es
ath a
Ġv ow
ess a
ĠEx am
ĠW u
f r
Ġ7 8
Ġcelebr ate
M r
Ġd ust
ĠD elta
hold ers
Ġst olen
Ġt ent
Ġpl ates
Ġdial ogue
Ġevent ual
o i
o an
ĠP ra
ĠPr ague
ick en
ĠInt elligence
in ts
Ġcommit ment
umb led
Ġpriv ile
Ġupd ated
ĠY u
ĠRhod es
ĠJ ar
Ġrele asing
Ġdec e
Ġshe ep
ugg ed
Ġfor b
Ġmoder ate
is ch
Ġconf lic
ĠMont ana
Ġrun ners
ĠTr av
Ġph osph
ill es
ĠE ld
Ġh ospitals
Ġl ux
Ġperman ently
ĠJ unction
Ġse ized
Ġ186 9
ern ess
d al
Ä Ł
i ability
Ġ7 3
Ġsuccess ion
f ounded
Ġsc iences
Ġconf ron
ĠG w
Ġimp ressive
Ġexper ts
ĠIraq i
ĠIsa ac
Ġw ished
en ess
Ġshel ter
Ġtri ple
Ġc ogn
Ġ18 30
ĠLuc y
ĠPal mer
Ġbelief s
ĠK il
A ng
cent ral
ri fic
ĠP ul
ĠC hes
s ized
ĠM ut
ĠB ent
ter ies
ax y
Ġmus cle
ĠM D
ĠMc M
ĠM ust
Ġen act
Ġsever ely
ĠSecond ary
ĠMo z
Ġel ite
enn e
Ġp unk
Ġprog ressive
Ġliter acy
ĠB ond
Ġobs ervation
Ġr anges
j u
v ia
Ġannounc ement
Ġmiss ile
ĠAr nold
ĠB og
I M
Ġcre ates
Ġbe ars
Ġ20 20
ĠUs ing
Ġor b
ent ieth
ĠElement ary
Ġ9 7
le nd
Ġse gments
Ġple asure
ro e
ag i
Ġautom atically
Ġrenew ed
up s
B E
uck s
Ġrad iation
Ġtransform ed
ĠInter state
Ġflu id
l ink
ĠBe h
Ġvir us
c ount
ĠVerm ont
ĠPhill ips
C P
ah an
Ġnumber ed
ĠH az
op ol
r age
Ġst airs
ĠH at
Ġshe et
um er
um ph
istr ation
i ens
Ġreg ulation
Ġmaintain s
Ġatt itude
Ġ7 4
ĠO bl
Ġb ord
un s
Ġhand ling
Ġrequ iring
Ġm aid
Ġad mit
h anded
Ġh ref
ĠJo an
Ġrem ix
et o
Ġproper ly
Ġsurv ival
Ġpun ishment
Ġsm oke
Î ¹
> </
Ġfre ight
Ġcl ay
ĠCom merce
Ġl unch
Ġlight ing
roll ed
ĠHarv ey
Ġflo ors
Ġt el
ĠÅ ł
arv ae
ĠAv iation
ĠT odd
Ġdepend ent
Ġrev ival
s up
umb ai
ĠCol lection
Ġcustom er
Ġrock et
ĠCh ase
spe ed
Ø §
be at
ĠPer th
amb ers
ĠMont gomery
ĠCD P
Ġunivers al
Ġadvert is
g i
Ġimmigr ation
Ġarrang ements
aur us
add y
> <
it ches
ent ry
rown ed
Ġo rient
ĠW inn
Ġpsych ology
Ġmir ror
ĠAc adem
Ġc ad
ĠCont emporary
Ġs que
__ __
Ã© r
Ġk ings
Ġab b
Ġart work
Ġap olog
op ened
art a
al in
Ġth orough
Ġoverw hel
Ġrebell ion
Ġambass ador
ĠPr ice
c ur
ĠAnglic an
ĠFace book
200 1
ĠN ature
ĠMarc us
ĠInd ies
Ġhop es
Ġcommun ist
Ġmagn etic
ĠP av
ĠT yler
ad ows
Ġdist ant
ĠKer ala
at ra
ĠH us
Ġpat ri
Ġfor get
Ġob sc
S ch
ĠCr ime
ĠSt arting
ĠJ in
ĠTransport ation
Ġprofession als
ĠS ask
ĠJust in
ĠRepresent ative
ĠSw an
Ġath lete
Ġown s
Ġdev ast
ah l
ĠJ en
Ġdevelop ments
Ġpit cher
Ġvar ied
Ġfort ress
B L
Ġsign ature
ĠK ash
Ġdies el
c z
om ber
ĠBou levard
Ġan x
ĠSt ef
Ġun expected
k ar
ĠJul ian
ĠEconom ics
Ġmanufact urers
au kee
P er
ĠL A
ĠNorth west
Ġun anim
ĠM ap
R ed
Ġf ung
ĠÃ ģ
ĠCons ervation
Ġstret ch
ĠC reat
Ġreview ed
az ed
S w
Ġmart ial
Ġw rapped
Ġconst antly
ĠO scar
Ġany way
d ed
qu er
Ġpra ise
Ġce iling
ri en
Ġillustr ated
Ġg ri
Ġc oc
w he
Ġphot ographer
M arch
Ġphot os
ull ah
ĠN AS
ĠF am
ĠRail ways
ai ro
Ġsomew here
v ar
Ġsw ing
Ġbre ad
Ġsac rif
Ġnom ine
book s
ĠS ak
Ġcre am
Ġesc ort
ind a
ĠL ov
ĠVal ent
Ġm it
Ġbed room
Ġgraph ics
les h
ĠViet namese
ish a
Ġ7 1
Ġent r
Ġcongreg ation
Ġwe aken
ting ham
Ġconf ront
Ġ18 00
att a
ĠSp encer
Ġhapp ens
ĠK le
it ol
g ov
Ġm emb
Ġreserv es
Ġrestrict ions
Ġvolunte er
umn i
Ã± a
ĠHe in
Ġres ource
Ġt ut
Ġen abled
itte es
ĠP ros
ĠCelt ic
ĠAr c
Ġvari ations
N ow
6 00
b in
Ġopt im
az i
ĠV ern
ĠO g
arm s
il ian
200 3
Ġstri king
Ġeditor ial
M ad
ip her
n al
ĠErn est
Ã¡ s
Ġpresent ation
ĠRev ival
Ġrefere nd
Ġcon vert
in ated
quir y
ĠLe ader
pen se
ight ing
Ġguid ance
Ġalleged ly
Ġinter vention
f irst
m akers
ĠDe ep
Ġtr am
v y
Ġsepar ation
Ġoccas ional
Ġwor ried
ĠGro ve
Ġsoc ieties
ist ani
ĠComp uter
Ġrequire ment
C o
Ġtribut ary
Ġcirc ulation
ĠSt akes
th al
l iga
ĠGoth ic
omet own
Ġhe m
Ġj umped
Ġcrit eria
L P
ĠLe ad
Ġinv ented
ĠG as
ĠV illa
Ġup coming
Ġcar ved
C ar
Ġp ounds
ĠRe ed
ĠL og
Ġinter face
t n
Ġh iding
ina e
ĠPan ama
Ġs its
Ġcon ce
ĠMan ager
Ġrel atives
ĠCard inal
ĠS or
Ġcivil ians
ĠD ol
w orld
ĠC ec
Ġsh aped
ok o
in ite
ĠPlay Station
Ġm all
au er
Ġsurviv ors
ĠIn g
sw ick
ĠR ah
Ġde als
Ġprov isions
U C
Ġstat istics
Ġhon ored
ĠAn im
ĠS of
ĠB ach
ĠG ra
Ġex terior
Ġanim ation
Ġdr unk
ĠL isa
Ġord ained
ĠA er
Ġmet ropolitan
Ġhe s
Ġo l
Ġany where
ĠSh a
ĠEx pl
Ġcent res
ĠR ams
ĠV ent
over y
Ġal tered
Ġsimilar ly
ĠCab inet
by ter
ĠBenn ett
Ġnerv ous
Ġex ile
ĠP on
Ġsh rug
I nt
Ġm orph
uss ion
z ed
Ġj et
Ġgr ants
Ġf ier
Ġproceed ed
% ),
Ġaud iences
ÅĤ aw
ĠSud an
ĠArab ia
ount ain
p in
ĠCh ang
ign ated
ĠR uth
em a
y ers
Ġarg ue
ap ur
Ġkill s
Ġanth rop
Ġw reck
Ġvo ices
Ġpri ests
ĠEx ped
it us
w aukee
umber land
Ġlo ose
s ed
Ġexplan ation
Ġgovern ing
Ġble nd
Ġwid th
Ġmo ist
m ill
Ġdoct ors
ĠAmbass ador
ĠB ear
Ġneighbour ing
ĠRo om
lin ing
Ġmolec ular
ater al
ub b
lect ed
ĠEs sex
Ġcollaps ed
Ġhy brid
u ros
ĠSte in
Ġdark ness
ast ed
G M
ĠM idd
ĠE C
Ġadvoc ate
Ġfavour ite
Ġsuggest ing
ĠKr ish
Ġl iver
Ġ185 7
U N
ac a
ult ural
Ġex port
d s
Ġaccompl ished
Ġreven ge
Ġ9 2
Ġprepar ing
Ġso ap
ĠC raw
Mus ic
Ġtri o
t z
h ad
Ġproced ures
ĠD og
ĠRay mond
or r
Ġpurs ued
ĠHig her
200 2
to ok
Ġdatab ase
h alf
ĠSl av
sc he
Ġpull ing
b ek
Ġcat aly
Ġsong writer
Ġattract ion
Ġgr ay
Ġto ll
Ġtrans it
Ġliter ally
ĠIndones ian
Ġlist ening
Ġacknowled ged
Ġcan on
Ġfurn iture
Ġelect ro
Ġdisp ers
bor g
Ġr ivals
Ġman ual
oin ts
Ġrest ore
ed a
ĠRena issance
Ġf isher
n ut
ĠD ays
Ġbe aring
Ġv ital
Ġimpro ving
ĠM umbai
ĠBl ake
ĠS yn
f ol
Ġcart oon
Ġlob by
Ġexplos ion
ĠR us
ĠG ener
Ġvar ies
Ġprot otype
Ġspecial ist
Ġign ored
Ġc rick
s ur
Ġs oci
Ġkind s
os hi
Ġcreat ure
Ġ ib
Ġv ibr
ĠSh ir
Ġst roke
ĠClar ke
bor o
i u
Ġaut obi
ell ation
Ġpract iced
Ġb old
h arm
s elling
ĠY et
ĠR if
Ġf o
ĠSask at
om o
ĠF low
ic he
Ġc ust
. <
Ġpot entially
Ġequ ally
E M
Ġsc ar
ĠO wen
in yl
boy s
Ġ185 9
Ġp ump
Ġqu oted
Ġb ore
Ġport s
Ġaut umn
Ġlaws uit
Ġpre y
ĠG y
ĠC e
Ġstream s
Ġpriv ately
Ġthreat s
Ġsym met
ĠSomers et
ĠF at
K ing
20 14
g ral
Ġrep ublic
Ġassess ment
ĠD od
ĠH D
Ġrec ruit
20 15
Ġbl ues
ĠTr adition
Ġreb els
ĠEm ily
Ġnot ing
h aus
Ġcomple ment
ic ia
ia o
h op
ĠP erson
Ġconj unction
ĠAgricult ure
Ġenl isted
Ġintegr ation
E uro
ĠStud ent
qu et
T ime
ĠG and
ĠF oster
ĠDr agon
ĠAir lines
Ġd iversity
ĠGu ide
ub a
Ġdivor ced
ĠPet e
sen al
Ġev ident
p ol
ĠD aw
ry s
ĠPl at
ĠG olf
ĠB M
Ġcons pir
ĠColumb us
ĠCh an
Ġh anging
ĠJ ava
Ġf ract
Ġwhe els
Ġcomp at
erv ing
Ġins cription
Ġins isted
hib ition
mun ition
ĠS F
ato es
av ier
ateg ory
Ġauthor ized
ĠPalest inian
orm al
ard ed
W orld
Ġf erry
Ġtou ched
ĠRe ading
Ġinhab ited
ay ers
ĠEnvironment al
ĠSc out
Ġmin isters
Ġt ension
ad ier
ĠLe ices
Ġb icy
ent e
E ast
Ġexpand ing
a very
Ġam pl
ĠA part
Ġrece iver
th ree
Ġtr act
ĠL amb
Ġcurric ulum
ĠT ong
Ġkn ife
a it
Ġcl ergy
Ġstory line
as an
Ġgather ing
Ġhit ting
ĠAr med
ĠMar vel
Ġfind ings
form ing
ount ed
Ġtrav elling
n av
ĠW alt
ĠFriend s
Ġdub bed
ov an
ĠLeon ard
Ġh ometown
Ġop ens
Ġshall ow
Ġfarm s
Ġquestion ed
Ġless ons
ail ing
ĠAl tern
Ġoper ators
ĠArt illery
Ġbur ial
Ġsp an
Ġpsych ological
Ã© l
Ġtop ic
Ġo w
Ġtarget ed
he rent
ter ing
ĠStock holm
ect ions
Ġt ables
Ġb inding
ĠLe x
f urt
Ġsing ers
Ġnation wide
Ġexpl ore
Ġengine ers
im en
ĠE RA
art en
Ġb ones
Ġjourn als
Ġmat rix
ĠFin ancial
Ġfound ers
osoph ical
ĠTas man
19 80
Ġh a
Ġthe sis
Ġconduct or
8 00
ĠL ot
Ġcomment ary
Ġr idge
p age
enes is
Ġst air
Ġdel ay
ct uary
Ġton ight
Ġin fer
ĠB rah
ters hire
c os
Ġheadqu artered
Ġregard less
um i
ag s
Ġarm ies
ĠWork ers
Ġhelicop ter
Ġsc attered
ĠA ires
Ġmin imal
Ġsc andal
Ġa est
Ġwond ered
ĠL ak
Ġemer ging
Ġcirc ular
Ġsh adow
Ġnomin ations
ĠP ent
hab ilit
ĠS ullivan
Ġstay ing
uck er
ĠK un
Ġind oor
Ġen able
Ġ9 3
t es
Ġent ity
ĠMc L
ĠL ink
Ġalleg ations
Ġbre ed
Ġpubl ish
Ġlect ures
ĠW als
ĠMag ic
Ġdecre ase
ĠSch ol
Ġemot ion
Ġinter rupted
ĠL ess
orn e
ĠJama ica
Ġvol unt
ĠLi u
ĠT all
T P
ĠW ag
Ġa uction
Ġpan els
oun ce
ĠW ald
ĠDiam ond
uls ion
m ans
om orph
ibl ings
Ġsk ull
y ou
ap est
Ġt ier
ĠN ine
p her
ut o
ĠS ex
ĠK ol
ro x
Ġinstruct ions
ã ģ
Ġbank ing
Ġtem ples
ĠRevolution ary
Ġnation ally
ĠGeorg ian
on so
im o
Ġper pet
ĠK ab
oll o
ĠOak land
Ġs ighed
Ġm ood
om i
ĠMat hemat
N ational
Ġcomfort able
um ble
Ġserv ant
Ġg arrison
G O
Ġs ew
ĠFl ight
rif ied
Ġtack les
ult ure
Ġqu arters
Ġbul k
ĠO w
ĠC ox
ĠProvinc ial
V A
ĠKn ights
ut ing
ator ial
M en
ang o
ĠB A
Ġm ansion
Ġare n
ĠLiter ature
ĠB uc
Ġinf ection
Ġconflic ts
Ġru ins
Ġl arvae
Ġwar fare
Ġin g
Ġproport ion
ĠBudd h
Ġgod s
Ġdi ocese
onn ie
ĠIn v
t or
bro ok
ĠMan ila
ĠF BI
Ġ8 1
Ġmut ual
Ġart if
Ġbow l
Ġgr id
ĠFour th
ĠSus sex
Ġcompr ising
Ġrevolution ary
Ġinvol ve
osl ov
ch air
ĠRet urn
ĠOt to
Ġtow ers
Ġw are
Ġconduct ing
leg raph
Ġany more
ĠJul ia
Ġment ions
R ober
Ġassoci ations
Ġinvest ors
Âłk g
ĠS ul
ĠR af
Ġtransport ed
pl ing
ĠFran Ã§
ad ian
ĠC and
ĠD in
P e
Ġpian ist
ĠBrun swick
im mer
Ġcod ice
Ġbul let
Ġassemb led
Ġir regular
Ġphenomen on
back s
Ġchap ters
Ġpartic les
Ġear s
Ġt ired
intend o
Ġcomp rom
Ġsurre nd
ash ire
Ġre de
Ġabsol ute
ac ular
ĠP od
Ġreferend um
ĠMore over
I R
Ġbat ting
Ġjournal ists
Ġal ph
ĠAn cient
Ġconsult ant
Ġint ensity
Ġdream s
oc ity
enh agen
Ġadop t
ĠLe ft
ĠDev on
Ġto pped
sh ore
ĠFor um
Ġvol leyball
is le
ĠY ellow
ĠLeg ion
ĠF ish
Ġconf irm
b et
Ġdemocr acy
Ġroll ing
Ġf ru
ĠAnt i
il o
ĠIm m
Ġsail ing
Ġinter mediate
ec raft
Ġ185 4
ad al
Ġgrand mother
ĠE ve
ĠLe gend
Ġinc hes
Ġvirt ually
Ġ8 7
ĠE ff
ĠWest minster
ĠR ut
Ġrel ay
ĠF ul
Ġspec imens
Ġsearch ing
M al
ĠB ros
ĠR aid
m id
D E
Ġsole ly
ĠWil helm
ĠT rent
up id
Ġar bit
ĠN ancy
ĠBos nia
Ġstre ak
Ġst aged
Ġin tend
ĠL akes
Ġactiv ists
hold er
Ġden omin
Ġs outheastern
Ġwer en
bu ilt
ĠNot tingham
ĠA j
od ing
Ġbu ff
Ã ī
Ġgoal keeper
Ġo v
ĠLiber ty
s l
ĠK ur
Ġd uration
ĠBu enos
Ġblock ed
ĠNA SA
ĠC R
ĠL em
amp ed
S an
Ġcons ec
c ano
ĠS O
Ġlay ers
Ġgener ate
Ġconfer ences
Ġhydro gen
ĠAm azon
Ġst ability
u ate
Ġwick ets
Ġdisc rimination
ore y
A ust
rug u
Ġc ouncill
Ġ185 5
âĢ ľ
Ġupgr aded
ĠD y
ĠS uff
ĠWed nes
um m
ĠUn f
pr ing
im ination
Ġ7 9
J ames
oun ters
Ġapp rent
A g
Ġp in
Ġh az
Ġcons ent
Ġhand led
Ġh ier
ĠAg es
Ġac oustic
qu arters
p it
viron ments
Ġmar ch
ĠV II
Ġvary ing
Ġnight s
ĠMc D
Ġeight een
ug u
Ġwithd rawn
GB T
ĠH ous
Ġprompt ed
Ġr ational
el ly
ĠB our
Ġcitizens hip
ĠMot ors
it ious
ĠTri ple
Ġh ate
Ġninet eenth
it tle
ĠLanc ashire
ĠHe ights
Ġobs er
h l
Ġh ull
Ġ10 1
Ġed ges
Ġr aw
Ġdepend s
Ġcrick eter
ĠEd ition
ang ered
ĠDur ham
Ġident ification
d ied
ĠFried rich
Ġconsequ ences
Ġm ild
ĠCong o
ingu ished
ĠTun is
c ul
ator ies
ĠExped ition
Ġmem oir
ĠMil waukee
Ġkick ed
ĠWeek ly
o op
ĠEag le
Ġround ed
B ar
Ġabs ent
Ġins pect
ĠMig uel
Ġgovern ed
Ġst uck
ill iant
ĠIndian apolis
ĠLou ise
Ġ7 00
velop ed
i ago
ĠD est
F r
Ġst ro
Ġphys ically
Ġdes ired
Ġ8 4
anth rop
g reen
ĠSer ie
Ġlearn s
ĠEll en
Ġdepos its
E m
ĠM ull
spec ies
Ġc ott
Ġun ve
ĠAh med
Ġder iv
Ġacqu ire
Ġest ates
Ġdisapp ear
Ġd ish
h ou
v or
Ġess ay
Ġsec ular
ĠJ ak
ĠW ool
Ġam munition
ber y
Ġ11 0
Ġconsequ ence
Ġf irms
Ġdirect ions
ĠJ ur
Ġperform ers
Ġp roud
ĠT ax
qu est
Ġsuppor ter
aly sis
Ġtest im
Ġintro duce
Ġor al
Ġwood s
uss els
Ġquant um
Ġread s
Ġcom ics
Ġpre liminary
ĠEd mund
ĠWrit ing
ot ing
s ing
d irect
Ġcur ve
Ġhealth y
Ġalgorith m
ĠNapole on
ĠM orning
Ġr ushed
d imensional
ĠNew port
C onn
2 50
Ġair field
ĠS ey
Ġ8 9
st age
Ġconv ey
ĠJam ie
Ġterr ain
ĠR an
Ġwant ing
u ador
ĠPres byter
ĠHe ath
Ġsound ed
e u
ord inary
ĠStr ateg
Ġpol ar
Ġ ic
k an
t age
ĠLabor atory
ĠT ir
Ġon wards
ĠBe ing
Ġint ens
Ġb apt
ĠP i
Ġ185 8
iat ric
Ġsuff er
Ġneigh b
Ġlibr aries
ĠH IV
ĠCh ronic
Ġflood ing
Ġch ore
ĠFilm s
ĠG ardens
Ġtri ps
ĠQu arter
intend ent
Ġcompet itors
Ġimp ression
ĠR overs
ĠCirc le
Ġsynd rome
Ġabsor bed
he v
Ġdraw ings
s al
Ġsum m
Ġmon arch
ĠChel sea
ĠK yle
Ġneighbour hood
Ġgast ropod
Ġnort heastern
j ust
gr and
h al
Ġwalk s
ĠCorn wall
Ġ8 6
Ġdef ine
ĠF ro
ath i
ict ions
Ġspot ted
ĠMo h
l ast
Ġs iblings
Ġun e
bu ilding
ĠL ar
et hel
ich ael
Ġdistingu ish
Ġtour ists
ĠPak istani
ĠP age
Ġtot ally
Ġtr ick
Ġb er
Ġ9 1
ĠGl ou
ĠK id
F amily
Ġ185 6
ich i
Ġnat urally
D I
ec a
Ġline up
s outh
Ġw elfare
ĠG ang
Ġun employ
ĠStev ens
Ġinterpre ted
z ig
ĠSimilar ly
Ġen orm
ĠCub an
Ġtrans formation
Ġwarn ed
Ġrain fall
ĠIs le
ĠFranc o
Ġc ens
Ġtorped o
Ġtalk ed
Ġbi ography
Ġres erved
st ed
ĠS ox
Ġconfig uration
ĠL ords
Ġinte gral
ut ely
found er
ĠA ub
N T
i ology
Ġan ime
Ġdecl ar
ell ers
Ġc ro
Ġanch or
Ġkill er
qu al
Ġ9 4
r ate
Ġemot ions
Ġassign ment
ĠN C
Ġs ear
Ġfar mer
ĠM ik
Ġh oney
ĠOut standing
ĠA A
ĠE SP
ĠFer din
Ġt ale
Ġdoctor ate
H F
Ġhom osexual
Ġachie vements
ĠD ame
ĠVol unte
Ġint r
ins ky
ĠArt ist
az ar
Ġcritic ised
Ġprem ier
Ġsens itive
Ġsleep ing
ov sky
Ġaut hent
Ġrem n
Ġgrap hic
Ġjud icial
Ġvari ants
ĠDr ake
ĠF ig
Ġst yl
Ġthrow ing
Ġcompens ation
ĠP ain
ĠN ak
ĠC ant
ĠK or
em e
ĠOther s
el ong
ĠSt ri
ĠAlban ian
u ania
Ġcomp act
Ġwe igh
ĠK as
Ġf ool
ter bury
L B
S ec
Ġoccur ring
J une
C ent
Ġsc rap
ĠL ok
Ġins ects
m ath
Ġthink s
is i
ĠR ice
Ġb arn
Ġgr am
Ġcol ours
Ġbut t
ĠL iv
Ġg reet
Ġnecess arily
A c
ĠCzech oslov
Ġby pass
ĠCy pr
Ġp aus
arr ass
Ġr ally
Ġbot tle
P P
Ġcomp ounds
ĠN intendo
Ġal umin
Ġm ate
off icial
ĠO S
osop hy
Ġ185 1
ili ary
( "
ĠP orts
b oth
isc al
ĠScot ia
ph is
R L
ĠK ill
ĠP and
Ġdemocr atic
Ï ģ
iz ations
G S
Ġplant ed
U SA
Ġsc hem
Ġthe ology
ĠPer formance
on al
ag ic
ĠArt icle
Ġsequ ences
ond e
Ġro ok
Ġconsider ably
olog ically
r ish
Ġt un
p y
Ġdoct rine
ĠSh in
Ġcor poration
Ġfe es
Ġmet ab
ĠCop enhagen
ĠC row
ĠM old
sc reen
d em
Ġcommand ing
Ġbig ger
Ġg ates
Ġc reek
ĠMaur ice
Ġh arsh
ĠB ag
id en
Ġb out
Ġsp ite
Ġimp osed
Ġgr ain
ĠGe off
ĠBel arus
Ġsac red
ym ph
w oman
pro duced
Ġlegend ary
Ġsh oes
Ġmist ake
Ġac claimed
Ġo ct
Ġref uses
w ind
ĠD rama
ĠMan it
ĠF uture
ĠK i
Ġhol es
Ġmigr ation
ĠC F
a que
am y
ĠPr ivate
ĠSub sequently
ĠRel ations
Ġtre as
ĠP ep
Ġadv ised
Ġreact ions
ĠComp an
d ing
ĠE ss
Ġcollect ing
ust ers
Ġmill ions
Ġman or
Ġsw all
á ¹
199 9
v as
ĠD uc
Ġbass ist
Ġarr ay
ĠW atch
N orth
ĠF aith
ĠCont inental
Ġun ions
Ġcent ered
ĠArm strong
J uly
Ġen vironments
ĠRon ald
iff e
alt ies
Ġworksh ops
Å Ľ
ĠObl ast
ĠEc uador
Ġ icon
ĠC ut
ĠM ead
il ion
aly mp
hy ll
Ġc osm
C ome
ĠD ata
Ġcap abilities
Ġp uzz
Ġobserv ations
Ġc ig
Ġv ector
ĠRh ode
ĠL ogan
ĠTh urs
ĠJac ques
Ġhost ing
imens ions
ĠHol mes
ĠB elf
ĠK arn
Ġbas ement
ac ional
Ġsport ing
Ġprec ip
Ġa ster
Ġair ing
ethel ess
Ġvar ieties
Ġr ushing
Ġg arn
pr ises
ĠPaul o
Ġdiscip line
Ġdevelop ers
Ġ8 3
ĠGi ov
ĠL odge
ild a
Ġun con
Ġvoy age
st all
Ġit em
ep ing
G C
ĠEm my
ĠS ite
Ġkilomet res
ĠO ber
Ġfold ed
H ey
Ġmyster ious
P aul
Ġhy d
Ġcompan ion
Ġcir cles
Ġquiet ly
he nd
Ġste ady
Ġdevelop er
Ġse al
C ap
Ġout come
Ġsymb ols
Ġhe ct
ill on
ĠT ab
Ġp ier
ple te
ĠT at
Ġcreat ures
ĠN g
ĠDav ies
Ġsurf aces
ĠX V
tal ions
ĠE is
ĠBr ussels
Ġmilit ia
ĠR ush
Ġvulner able
ĠR aw
ĠCh ad
ĠD ale
et ing
b ank
A pril
ĠC yr
Ġspec ified
ĠV iew
ĠU rugu
ĠTr ack
Ġgl ad
oc ene
ĠC red
Eng lish
ĠPh ot
ĠRe id
Ġmy stery
es ar
Ġg ently
Ġm ud
Ġmanufact ure
off s
Ġpoor ly
ĠFr anz
ed ge
oph one
Ġveget ation
uch y
p ress
ĠArt ists
O T
ĠBrook s
ĠC C
ĠCard inals
Ġterrit orial
Ġinnov ative
ĠR oth
ĠB ark
E very
ĠBened ict
Ġd ad
u in
Ġsl avery
ram s
ol ith
ĠAdvis ory
Ġagg ressive
Ġdis agre
Ġlect urer
Ġass ume
at em
Ġr ape
ĠM am
Ġr iders
ĠZh ang
Ġjournal ism
Ġcam eras
Ġl ots
th is
Ġmanif est
Ġj oy
ĠCh uck
Ġac claim
ĠZ imb
aj i
Ġadvis or
Ġjoin s
Ch ar
ĠX I
Ġdecre ased
P ol
Ġg low
Ġn aming
ĠM C
ĠH ull
Ġimprison ment
ap a
Ġg odd
sk a
Le ague
Ġens emble
Ġmar ble
H C
ĠL ocated
Ġver te
Ġundert aken
Ġab bre
ĠD ad
ĠAp ost
ĠCard iff
Ġd ors
Ġhon est
Ġvic inity
ro le
ĠL ac
Ġreb ounds
Ġc odes
Ġ- -
O ctober
Ġad option
Ġs ulf
Ġob st
Ġtw entieth
Ġqu e
Ġdyn amic
ab we
ul ates
Ġhum or
D avid
ĠF ly
Ġboard ing
st op
Ġtrib al
Y our
im ity
Ġpros per
Ġimm un
Ġacc us
ĠCa uc
S eptember
Ġconf ident
ĠP ly
ĠAh mad
ĠSt age
ĠAbd ul
Ġdr ives
Ġconsider ation
Ġle ase
so le
lik ely
ĠB od
Ġmagn itude
Ġuncle ar
Ġlog ic
ere k
Ġagre es
ĠKing ston
ĠTw itter
Ġfore ver
Ġsuburb s
ol ics
ĠRabb i
ĠSh ield
ia z
st able
ĠF oot
Ġfat al
Ġaccord ance
ĠWood s
ĠCypr us
Ġteam mate
Ġexp elled
ab i
D R
Ġexpl oration
P al
ĠC itiz
Ġinc idents
ĠPrinc eton
ĠLith uania
Ġkiss ed
ur as
ĠP ick
ĠSher iff
ĠL GBT
Ġrecon struction
ĠBr id
Ġinteract ions
Ġ185 2
Ġmathemat ical
Ġrev ived
st ock
H er
Ġch orus
ĠO z
ĠC ann
Ġprov en
Ġpred icted
Ġn urse
n ai
A f
io let
Ġf ires
na issance
ĠGene va
ik es
ĠAndrew s
Ġnot ion
Ġe ase
Ġl over
20 16
Ġball s
L ife
Ġconscious ness
Ġst aring
ĠGrand e
ĠC ort
Ġ" ...
ĠSomet imes
S te
Ġexam ined
ĠF erg
Ġsouth western
ent o
ĠA w
ĠMe g
Ġlist ing
ĠCan terbury
CA R
ĠMor r
w id
ĠH erm
Ġprob ability
orient ed
ash ing
ol ine
Ġqu art
S al
und a
Ġpal m
Ġfeed ing
Ġrot ation
M et
Ä ĩ
ie u
Ġbreak fast
s ix
ĠSur rey
ĠSol omon
uan ian
Ġl un
ew ise
o que
ĠF lying
Ġmission ary
Ġcons ensus
Ġdr agon
Ġp ig
ĠAdv anced
Ġhabit ats
ok u
Ġaer ial
Ġlif estyle
I F
ĠUg anda
ĠM ang
l ies
z ing
ros cop
Ġopp osing
av in
Ġep it
Ġ ion
Ġd imin
Ġj e
ĠTrans it
ĠJohann es
Ġcomplic ated
Ġspeak s
ĠS ource
g overnment
ibl ical
Ï Ĥ
Ġint ellig
ĠUnivers e
Ġbet ray
ĠPar alymp
ĠDun can
Ġc ant
er als
Ġtheore tical
Ġcur rency
s ign
ar ians
ĠKaz akh
Ġs ke
ĠB ears
ĠD im
ĠGu ang
Ġmonitor ing
Ġmin eral
Ġsub stance
Ġcop yright
Ġb ills
Ġhuman ity
Ġor ph
Ġqu it
J os
Ġpur ple
ĠC avalry
Ġinterview ed
Ġw arr
Ġattract ive
Ġf ed
b est
Ġvo iced
ou x
ĠAnn ual
ĠEll is
ĠCol in
Ġc er
ĠR ank
ĠPubl ishing
Ġconv ince
Ġsepar ately
Ġfinal e
Ġd ock
Ġd ancer
Ġs aving
Ġad equ
ĠHind i
G od
ĠMoroc co
Ġto ss
Ġbo ost
c ap
Ġmat ure
Ã© d
Ġre join
anc ers
ĠJess e
Äģ n
ĠEst ate
Ġro de
Ġn avy
ĠH im
ĠCompet ition
Ġ185 3
b ian
yl an
Ġal gebra
Ġrep airs
ĠEngine ers
Ġl ib
Ġpropos als
ĠTest ament
ĠLuther an
ĠCamp us
Ġpres ervation
ubl ished
iction ary
Ġgar age
ĠMalt a
s omet
ĠBaron et
ĠH i
Âł ft
ĠPresbyter ian
Ġsl opes
miss ions
ĠAl pha
Ġv ig
Ġin clusion
Ġcolon el
Ġgu ided
Ġr ings
Ġz ones
O W
er i
n on
et e
Ġrev ol
ĠAn a
id i
ĠT alk
Ġbacter ia
Ġch a
ar in
ĠDist inguished
ĠFerdin and
Ġcr ashed
Ġo ak
y d
Ġcondem ned
Ġremov ing
Ġcon ceived
song writer
ĠT ampa
Ġarm or
ĠK em
ĠAg re
ĠUnf ortunately
ĠT ree
ens en
ĠConstant in
Ġinv itation
d ivision
it ory
Ġw olf
ĠA ur
and ra
stan bul
ĠBas in
Ġreg istration
Ġcruc ial
Ġarg uing
che wan
ĠDomin ican
Ġclim bed
less ly
th ouse
Ġaver aged
ĠCy cl
anc a
Ġemb arrass
c u
Ġsal ary
Ġperform s
Ġan ten
p ath
ah u
Ġa rose
er ie
Ġd ining
Ġen cl
Ġy es
ĠG T
c or
ĠA ch
Ġcl erk
Ġlay out
ĠPl ate
ĠBe aut
Ġn od
Ġw ishes
Ġcustom s
Ġest imate
Ġdraw s
Ġde alt
Ġpromot ional
Ġdeep er
ĠOs lo
ĠBrad ley
air y
ĠP ir
row ing
ĠF ighter
Ġfoss il
el o
l ass
an ian
Ġdiscuss ions
Ġwild life
Ġover come
merc ially
st airs
ĠSalv ador
Ġconv oy
ĠR anch
Ġrenov ated
d ays
Ġpop ulated
Ġbur st
est e
ĠBrad ford
he ng
Ġestim ates
Ġor g
ot he
Ġcr ack
Ġnorth western
Dec ember
Ġoff ense
Ġprox imity
Ġport raits
Ġread er
Ġl ord
ud ed
Ġconst r
Ġib n
ĠRichard son
Ġhappen ing
Ġch lor
Ġserv ants
if ax
ett es
ĠG ren
Ġstrugg ling
Ġcare ful
Ġbelie ving
ĠBe a
ĠV oice
Ġmeas uring
ĠSim pson
on ne
Ġassass ination
Ġam ph
erv es
Ġleg acy
C al
ĠG ael
Ġpen insula
Ġexha ust
ĠAd rian
ĠA N
Ġinst ant
{ {
ĠG az
Ġlim estone
ĠN as
Ġdro pping
ĠDyn asty
f old
ĠI BM
Ġ184 9
L os
Ġfort une
Ġatt ribut
Ġreleg ation
c al
R ock
ag le
l abel
ass y
Ġpre val
Ġex empt
Ġspect rum
ĠId aho
Ġsp l
Ġprotect ing
Ġbr ut
id an
ĠArmen ia
ĠA B
Ġless er
g ener
Ġlik es
Ġflag ship
Ġpost hum
Ġstri kes
Ġarchitect s
ĠGib son
ĠCarol ine
es a
Ġcount ed
Ġdefin itely
P M
Ġbi ology
ish i
ook s
re v
ĠAct or
ĠSant iago
ĠH ass
ĠZimb abwe
et ry
Ġtr apped
Ġs unk
Ġsurpr ising
F l
ĠEp iscopal
Ġfe ather
Ġto b
S uper
Ġrecon c
Ġped est
ĠGu ards
can ic
ĠLux emb
he ro
Ġrend ered
199 8
e astern
Ġkeep s
B rit
Ġent ries
Ġleg ally
19 70
ighth ouse
Ph il
r ant
Ġinvestig ated
Ġrenov ation
c hester
ĠLegisl ature
Ġtom orrow
Ġox id
Ġcontin ental
Ġrival ry
Ġad m
ĠP ink
Ġsw ept
ĠSaskat chewan
ĠTr in
Ġaccident ally
Ġf lesh
ard i
Ġsm ell
ĠM ine
Ġj aw
ĠVlad imir
Ġunder lying
Ġmin im
oun s
nold s
ĠL ie
Ġlow ered
ĠS ang
Ġrom ance
ĠWild life
ĠS ter
any on
el in
ĠDes ert
Ġd imensions
ĠBel grade
Ġ184 7
ak u
Ġremark able
d an
Ġactiv ated
ĠPrincip al
ĠP ath
ĠSebast ian
H ist
anc ement
oy le
Ġinter ven
Ġwithdraw al
ĠCl aire
Ġsc ales
Ġbox ing
ane ous
Ġball ot
Ġconsid ers
Ġtr ace
ĠFound ed
Ġl aps
Ġconqu est
ĠT iger
ĠM obile
ĠH ir
Ġboy friend
enn ium
C omm
ĠPer haps
Ġkn ees
Ġhorizon tal
Ġdepict ing
Ġreb el
Ġabst ract
ĠSch w
ical s
O M
ĠSaf ety
Ġr amp
ĠP orter
ĠK urd
Ġrun way
ĠV id
ĠE b
es ters
ĠD j
ed o
ro ying
P at
Ġtr im
e a
Ġhur ricane
ĠBa iley
Ġelabor ate
ĠV il
ĠK urt
Ġbut ton
Nov ember
199 7
ĠAr senal
ĠF inals
ri um
ĠA F
in as
ĠHend erson
Ġrespons ibilities
Ġt ough
Ġmark ing
Ġre per
abl ing
enc ia
Rober t
Ġpres idency
om atic
ĠRod rig
ĠG ol
, '
Ġr ises
Ġst ead
th an
idel ines
m ember
Ġc ooking
G N
Ġn aked
ĠK ra
S ir
Ġbond s
ĠWednes day
ugh t
aw i
ĠPow ell
ĠD und
ell ar
Ġdis abled
Ġp ine
Jan uary
Ġv ault
Ġd ense
ik ing
P ort
d orf
Ġp ushing
ux iliary
Ġtr igg
ac hers
ĠAct ress
ĠW orth
Ġh ub
Ġarg uments
Ġwitness ed
Ġr ush
Ġthr ust
am ine
Ġconsist ently
Ġv inyl
Ġbr ands
Ġfer til
app a
ĠT roy
ĠS H
it ative
ĠC IA
us hes
Ġcust ody
Ġor ch
Ġtheore m
ou p
ĠEd itor
Ġm arri
ĠC ord
Ġdirect ing
Î µ
Ġsl ipped
ĠESP N
ĠM oses
th ood
Ġdet erior
ĠD ob
ĠIn stit
ĠGer ald
Ġsub urban
ĠMar io
Ġprem ises
ĠHur ricane
ĠH od
Ġrecon struct
Ġmanuscript s
ĠRe ich
ĠGl ass
head ed
ĠS aw
ĠSt ore
Ġs ne
lin ary
Ġenroll ment
ĠAlb ania
ĠWar wick
ĠBry an
ĠAm endment
Ġdemonstr ate
ĠPrest on
Ġansw ers
Ġcon tend
Ġjud gment
Ġterror ist
ucle ar
H ung
Ġ13 0
Ġexhib its
ĠHer ald
Ġall ocated
Ġalph abet
ĠN umber
add le
ĠPark s
Ġinc red
ĠM ing
ĠScient ific
ĠGu j
Ġpar as
ĠBl oom
ĠH alf
Ġsn ail
ant le
ĠM ade
ĠKum ar
ĠDirect ors
ĠPro per
ĠCath olics
ĠAnn ie
Ġcalc ulated
ĠRom ans
Ġs ank
Ġm anga
enz ie
Ġsome how
Ġbankrupt cy
ch ron
qu in
Ġster e
ĠD S
" ".
ĠBright on
ĠM s
Ġemb arked
Ġinstruct or
Ġth read
ĠV eter
gr im
ĠP iet
l isted
Ġfrag ment
h urst
on ing
b one
Ġpurs uit
ĠPly mouth
ĠMem phis
Ġmechan isms
Ġfavor able
ĠCurt is
Ġprohib ited
ĠSh op
Ġcreat or
Ġst abil
rit ic
ĠV a
ĠPal m
Ġn a
ve ill
ĠForm ation
O kay
ĠDou g
ĠBl u
rest rial
g ary
ĠFellow ship
Ġemigr ated
Ġbreath ing
B rien
ut a
ĠHe aven
Ġtr ap
Ġkey s
ĠMach ine
Ġinter im
ĠManit oba
se at
ĠAddition al
O ld
Ġexpl ored
Ä Ļ
Ġcompos ers
Ġl on
ĠMon ten
r and
Ġprot agonist
Ġclimb ing
Ġun ited
Ġ184 6
ist le
Ġsol ve
c r
Ġham let
ott a
ĠCl aud
"> </
ĠRepublic ans
st ra
O P
clus ive
S am
agon al
Ġfre estyle
ĠS ep
ĠNA TO
c ock
Ġun t
Ġr anch
Ġenorm ous
ĠA FL
Ġpres um
Ġput s
ak k
S at
ĠCh ancellor
Ġscreen play
Ġautonom ous
Ġappro aching
ĠB il
ĠBC E
D id
Ġfight s
Ġbot an
ĠM iles
Ġmolec ules
ĠQ ing
ĠT H
Ġbe ings
mon ton
ic z
ĠS old
Ġcont ents
Ġme al
I reland
j ud
Ġorient ation
Ġstrateg ies
Ġte lev
Ġtrad em
H en
Ġopt ical
Ġshrug ged
Ġf rog
Ġopen ly
ĠLind a
ĠMil ton
Ġnickn amed
ĠN adu
Ġpron ounced
old s
Ġprior ity
ĠBur ton
Ġcrown ed
S y
Ġwel come
Ġl oves
Ġabbre v
r ange
Ġlet ting
Ġinaug urated
sm ith
Ġcl oth
Ġalt ar
Ġcast ing
at to
Ġpre f
land o
Ġcontroll ing
% ).
ĠMar tha
Ġtact ics
ĠPr ison
Ġresc ued
M T
gr ad
ĠCrit ics
Ġgodd ess
le z
ĠB aby
Ġ15 00
ĠAgain st
veill ance
ĠC anton
Ġobvious ly
Ġrecur ring
Ġhar ass
Ġwa ist
Ġdep icts
ĠCom edy
ĠCl a
Ġsurrend ered
ĠC ris
Ġsculpt or
at ics
ĠCal gary
ĠCol lect
Ġint act
Euro pe
Ġreve aling
pow ered
Ġf are
Ġc ub
Ġavo ided
ĠD ow
as ium
ĠCamb od
im er
Ġdest roying
m al
ot ted
Ġcor ridor
Ġafter math
Q ue
ĠTh ir
Ġsub family
Ġb arrier
Ġh aul
Ġaut o
Ġret rie
he ll
Ġsur pass
Ġport fol
ĠD arl
mark et
Ġpolit ically
Ġing red
ĠT ues
Ġh o
Ġbath room
Ġ18 12
ĠCont est
Ġcontinu ously
Ġsub species
ĠHal ifax
y ards
Ġg amb
Ġcomm ittees
Ð º
R ich
Ġbl ade
ĠSpe aker
p ose
Ġt une
ĠFerg us
E F
ĠAssoci ate
ist ocr
ĠSh ore
] ,
ig ger
ij a
ocol ate
Ġtob acco
S l
ĠB alk
ĠBas il
Ġsum mon
Ġs ax
ĠAb original
G et
im an
ob s
Ġce ase
ĠS ara
Ġsuperv ision
ĠPe ak
ĠC ert
Ġkn ight
ag ne
Ġpor ch
os ely
act ic
Ġstop ping
Ġfacilit ate
ĠPar am
ĠHop kins
Ġgener a
Ñ ĥ
Ġr aced
ĠCl if
Ġlast ing
Ġmemb rane
M a
ĠHar per
Ġd orm
ĠUS SR
Ġentreprene ur
oc ate
Ġind irect
ĠEv angel
ĠAr d
Ġspons or
ar u
Ġbox es
Ġpay ments
ad h
ĠFern ando
Ġjoint ly
ĠH aven
Ġper former
Ġurg ed
Ã Ĺ
ĠFilip ino
Ġal arm
k ind
in um
Ġathlet ics
Ġgame play
L ittle
N P
Ġmon ks
Ġp ub
com es
Ġp av
Ġdig it
Ġcom mercially
itz er
ke es
ĠPhil osophy
Ġconsum ers
Ġf ron
Ġb uck
Ġt a
Ġun likely
Ġimport ed
i ott
ist on
as se
ĠNap les
Ġf et
ĠColon ial
Ġtro phy
Ar t
Ġre habilit
ĠInter ior
O L
Ġsix ty
Ġrecre ational
Ġmos que
ĠV ale
ĠPl aza
1 50
O ut
ĠGu atem
Ġfac ade
Ġsp ur
ĠAll ah
ĠMc Donald
Ã¤ r
S ee
Ġin land
ĠRey nolds
Ġfact s
Ġphilosop her
h ouses
ĠTe h
Ġep ic
ĠCoal ition
ĠI gn
ĠTr ain
enn a
Ġagre ements
ĠFrank furt
Ġut ility
ĠL ig
ed uc
ĠSlov enia
ĠCr us
onom ic
Ġfact ion
Ġrelie ved
Ġload ed
ĠExam ples
Ġhum id
ĠRh ine
erv atory
ĠCor p
Ġpar ad
D es
ar ium
rib e
ip ed
ĠSab ha
ĠR ab
ur ities
Ġaud ition
Ġenter prise
kin son
Ġpreced ing
ĠC anyon
col m
ĠR A
Ġexc ited
and ro
Ġphot ograp
Ġchalleng ing
ĠCh a
ĠEug ene
pl ane
Ġsal v
Ġrecept or
Ġaccept ance
ĠPr ussia
Ġplan es
Ġl os
man uel
ĠC u
Ġinvestig ations
ĠWes ley
ĠB rent
Ġsocial ist
Ġmurd ers
ĠCap itol
ĠP am
ĠStud y
Ġbit ter
Ġc ere
ok en
ĠGiov anni
Ġtruck s
ĠPre fecture
ĠCat al
Ġhypothes is
Ġdeleg ation
Ġsculpt ures
ĠAlb any
al is
he ars
Ġep id
Ġpro claimed
ĠCh in
Ġprop ri
ĠN othing
it ively
Ġsuccess ive
Ã© m
Ġhot els
Ġinher it
Ġ18 20
ĠFif th
7 00
ĠAll an
ĠMan or
g ae
Ġbound ed
ar is
land ers
ĠHar bour
Ġres ur
Ġdescend ed
ĠK aren
ĠHe at
ung le
ĠG P
ĠBed ford
Ġsh ar
Ġtick ets
Ġelder ly
Ġbr illiant
Ġmot if
Ġrap per
Ġwitness es
ri er
ĠW end
z ens
ĠRes ources
Ġvel ocity
ĠMar ines
Ġnovel ist
Ġ184 5
Ġl uck
Ġlab els
Ġenh anced
Ġc razy
c ussion
ĠS isters
ĠB end
Ġgen res
all i
) ",
Ġw rap
Ġph on
ĠLes lie
Ġdiagn osed
h as
ĠK in
est ablished
he y
ic us
Ġhard er
at ched
Ġst upid
Ġin cl
ĠP ine
Ġte nder
Ġlength s
Ġpossess ed
Ġachie ving
en i
ĠH ess
ĠMus ical
Ġforg otten
ĠBo eing
Ġsub mit
b ad
m and
ĠAn at
h ra
ĠChar ter
Ġhe ter
ĠBelf ast
ĠJerem y
ĠD w
Ġb reat
Ġcount s
em por
Ġrad i
Ã ¯
ĠCry stal
Ġher s
G P
ric a
ĠThurs day
ĠF eder
ar re
ĠNik ol
ĠM echan
ĠC ed
d is
ĠMidd les
G reat
ĠT anz
is ive
Ġax is
ist ence
ĠAgre ement
Ġresp ected
Ġsemif inals
Ġfe ared
Ġant ib
ĠGl obe
Ġhar bour
Ġunve iled
d aughter
Ġbomb s
Ġh ttp
ĠAlexand ria
Âł M
Ġbat teries
Ġbu ying
Ġb ishops
Ġrul ers
ĠLy on
Ġpast or
Ġfound ations
ĠF olk
Ġsett ings
ĠQ ur
x i
ĠL ah
c in
Ġadd s
ze gov
ip ur
ĠPhys ics
ĠE g
est ock
ĠJenn ifer
Ġdiv ide
ĠWind sor
h ttps
at al
ĠC it
ĠArch ae
ĠB ever
ĠPl anning
ĠC ave
ĠH arm
ĠPorts mouth
Ġhard ly
a uthor
v ens
h art
T I
Ġworksh op
ĠFr aser
Ġ à¤
Ġpoin ting
eal ous
zh ou
Ġlux ury
Ġc ater
l ay
Ġadv ocated
Ġadministr ator
Ġprevent ing
Ġcl uster
Ġmotorcy cle
ĠX X
al id
Ġdisc ipl
199 5
id ays
Ġunc ons
ĠMon roe
en ary
form ed
Ġinv aded
ĠV III
w alk
ĠM ail
Ġsustain able
ĠRoberts on
Ġauth ored
ĠNS W
ĠD ylan
Ġorgan ize
ain ted
Ġor th
Ġrel iable
ĠLe vel
ass is
Ġad mission
Ġtack le
à ¦
Ġcompr ised
ĠLe op
ely n
ic les
Ġerr ors
199 6
A h
Ġmod est
ĠF un
stad t
uch i
Ġseek s
ĠVar ious
ĠEd monton
ast ics
Ġstat istical
Ġw itch
Ġproceed ings
Ġproceed s
ĠSpring field
Ġres olved
Ġtorn ado
am as
ĠStaff ord
ã ĥ
ĠO ct
ĠPro f
Th ank
ĠRoc hester
Ġartif acts
Ġl aser
op ing
ĠTy p
Ġtherm al
Ġt ap
ĠSh adow
Ġveter ans
al though
Ġbl ast
Ġend angered
L es
y ch
Ġraid s
Ġvac ant
Ġsynthes is
Ġsub div
Ġreal izes
iment al
ĠC ly
oc ial
Ġun to
Ġhe aven
L ou
Ġconspir acy
cript ions
Ġaccur acy
Ġmus cles
Ġrub ber
ĠSchol ars
ad ia
Ġge ographical
ace ut
ĠBer k
i ots
ĠC ome
Ġseem ingly
Ġperfect ly
ĠSp art
ĠG Ã¶
O f
Ġsp at
Ġbe nd
ĠR ib
Ġphil anthrop
Ġb eds
Ġmuseum s
Ġreflect s
Ġmater nal
Ġcontract ed
Ġcont rad
e i
ĠL enn
abl o
Ġrect angular
ĠHead quarters
Ġlong time
is dom
Ġfun ny
Ï ĥ
ĠPresident ial
war f
Ġsect ors
ĠParliament ary
ĠGl enn
ĠM oss
ĠL omb
ĠAp ollo
own er
Ġc hess
ĠN an
Ġper f
Ġinnov ation
Ġobtain ing
Ġl ined
R ussian
Ġancest ry
atern ity
Ġver b
Ġall ied
Ġm a
av o
duc er
Ġadv ancing
ĠG em
ĠMc N
ĠOrig inal
Ġcontest ants
ĠNot re
Ġext ract
ĠB anks
Ġflow ing
ĠBurn s
Ġbl ess
Ġem bed
ĠAng els
ĠO wn
ber to
Ġsend s
ĠArchitect ure
F ebruary
ond o
Ġlack ed
Ġspons orship
ĠG amb
Ġcour age
Ġsh ocked
Ġs ink
b ase
od or
ĠBill board
ĠT ask
Ġfle e
Ġcert ificate
th s
Ġille g
the re
Ġd irt
ĠI F
Ġresear cher
ĠL ic
ĠW ord
ĠL iz
Ġdep ot
Ġres ist
ar ity
r ina
Ġstr ings
Ġunder go
Ġmerch ants
ĠD iana
S aint
Ġpeace ful
G old
ĠCinem a
Ġintro ducing
osy stem
ĠComple x
Ġsacrif ice
ĠC rist
if iers
M at
ĠU m
Geor ge
s i
Ġsl id
Ġsil k
Ġar istocr
Ġsp are
ind s
Ġaccompany ing
ĠA L
iform es
ĠV ij
Ġcare ers
ĠK end
Ġ183 7
Ġunsuccess fully
her ic
Ġsecret ly
Ġwings pan
ĠDep ression
Ġloc als
Ġ12 5
ĠD ew
Ġm arsh
cy cl
ĠC el
Ġpract ition
B R
c ard
l if
Ġpresent ing
ĠK w
Ġhol y
ĠEston ia
Ġpropag anda
Ġup r
Ġm il
Ġ14 0
ord ination
ĠL ost
ĠW arriors
ĠAmeric as
ĠU A
ĠSem inary
Ġe leg
w ald
Ġh unt
ĠL S
ĠGh ost
R eg
ack er
yl um
Ġtr unk
Ġo ri
ĠProg ressive
Ġv ine
ĠWrit ers
Ġdet ective
iv o
Ġdisp uted
f in
ĠMorr ison
Ġsc out
Ġdis k
Ġfact ories
Ġinn ocent
Ġcerem onies
Ġc af
Ġinv ested
Ġtr ails
Ġlo ans
Ġnational ist
Ġdeploy ment
ĠH MS
ĠH off
ĠI stanbul
y g
Ġiniti atives
ĠAber de
y on
Ġ3 50
ĠLyn n
p ri
Ã °
Ġdemonstr ation
ĠCom b
iffer ent
Ġdis gu
20 17
Ġobject ives
ad os
et ics
ĠKenn eth
Ġc ord
Ġd iving
ĠBet ty
Ġdon ations
Ġdec ree
cles iast
h ot
Ġdif f
Ġg rip
Ġvamp ire
p resent
Ġs aint
rit ion
Ġpar ade
et ti
Ġser ver
Ġdeleg ates
Ġpre tend
ĠR NA
Ġrook ie
ĠÅ ģ
Ã¡ r
Ġl ig
Ġcontact s
Ġm aj
en o
Ġsy ll
ĠCo hen
and in
Ġvari ables
ĠL az
ri ans
ĠY es
Ġsl am
Ġaccompl ish
ĠK ane
Ġflo ating
ĠM ale
Ġn an
mus ic
ĠW ake
ĠLanc aster
ĠBarn es
ĠU tt
ĠB ord
Ġsub ordin
Ġne ur
Ġgr ace
Ġspec imen
H ar
Ġhost ile
ĠC lement
ĠWag ner
ĠH els
Ġmanag ers
ĠM ick
ver age
Ġvol tage
ĠAntar ctic
Ġmon ster
ĠF ay
ĠAcc ount
ĠIs ab
ĠEx cell
Ġtestim ony
Ġprom ising
Ġeval uation
ĠK ann
Ġt onn
Ġinter f
Ġess ays
Ġpo ets
ĠÃ ĸ
Ã »
fic ial
Ġflow ering
or rect
Ġdim ension
Ġmar ched
ĠI N
Ġch im
ĠW A
ĠBuddh ism
zegov ina
ĠLore n
Ġnavig ation
ĠLuxemb ourg
Ġb ent
ĠA FC
Ġpresent er
sh ot
Ġl ighter
act ions
oty pes
ad io
Ġtr ump
s qu
Ġsp elled
D ay
G l
ĠK ang
ĠCar roll
Ġgradu ates
ion ed
Ġpromin ence
orm s
Ġtort ure
epend ent
Ġbat ted
Ġrev olt
ir ie
ĠRich ards
ĠD ipl
ĠInd ividual
Ġch uck
Ġexerc ises
Ġsl ot
Ġ184 1
Ġmiss iles
ĠBo hem
ĠNob el
Ġcons ort
âĢĻ .
duct ive
Ġrout ine
ĠDay ton
E v
Ñ ĸ
á ½
Ġam id
Ġwrest ler
Ġas cend
ĠRe ver
is ode
ĠBalt ic
H igh
Ġsp ark
ĠFact ory
Ġreun ited
Ġb ike
T op
Ġreal m
ak ov
Ġmarket ed
ĠI TV
ĠSac ram
" âĢĶ
ĠOr lando
sm ashwords
Ġout lets
m ain
Ġspe eds
elf th
Ġcrew s
amb o
or ate
Ġcap ability
ir ical
I tal
Ġab ortion
hem atic
Ð »
Ġch ains
Ġpaus ed
pe ople
Ġbat talions
ĠV iol
ig ate
Ġrefere e
uff icient
ĠAc cess
Ã© g
ĠD ud
Ġp ond
ph ant
Ġk een
ĠC os
b ird
W R
Ġcol ored
ĠQu est
Ġir rig
eg ie
Ġ10 5
... ]
Ġ3 60
Ġvers es
Ġs izes
ĠF R
Ġsub stit
ol an
Ġent ities
ĠD um
Ġc anton
ĠC ros
ĠE k
ĠPol l
Ġult imate
Ġdeclar ation
r ise
im on
an or
un al
ĠEx hibition
ĠInd ex
ĠD oll
ĠLiber ation
ĠLyn ch
Ġg am
Ġcompl aints
Ġsp o
ble m
H ol
ĠM uk
Ġro d
ĠSp ider
Ġreg iments
Ġprosp ect
B el
ian e
ĠSouth west
ĠWork ing
Ġdet ected
Ġnomine e
Ġc arriage
Ġsur geon
ĠGriff in
occ up
el age
arent s
ĠAr ctic
en heim
ĠChurch ill
Ġcontin ent
Ġimag ine
Ġle nd
com ed
Ġe cho
ĠN acional
Ġuncons cious
on ation
Ġconqu ered
s chool
ĠMerc ury
m ile
Ġfrag ments
Ġw ounds
Ġpoll ution
Ġcr im
mod ern
ĠI g
Ġopin ions
h ole
u um
Ġwhen ever
Ġview ing
Th omas
ens ed
ĠV ick
Ġhon ours
Ġhighlight ed
Ġder ives
atern al
ran o
end ers
p res
Ġc arn
os ity
Ġse ating
m ic
ĠMar ion
Ġthr iller
ĠSt ra
Ġed iting
Ġres ides
ĠI D
Ġrespons es
Ġp ipe
Ġproject ed
Ġ184 4
Ġhold er
c ience
ĠG ir
Ġp enn
ind ers
ĠPar ad
Ġf illing
Ġoverwhel ming
Ġcry pt
k ers
Ġcrit ically
199 4
Ġelimin ate
ress ing
Ġdemand ing
ĠT able
Ġtr aces
Ġmag ical
Ġpregn ancy
Ġpar ishes
Ġhand ful
ne ath
Ġ183 6
T R
F irst
J ack
Ġpr ide
ound ing
Ġmet re
ĠHun ting
le ft
Ġaccount ing
child ren
F rench
wa it
ib li
Ġw ool
Ġdece ased
ĠSe oul
Ġper ception
ri pp
Ġ183 8
ĠAgricult ural
u ce
Ġt ear
ĠPr act
Ġsmall est
ĠP omer
Ġlaw yers
ĠS weet
Ġgif ts
Ġb io
Ġform ats
Ġd il
Ġtri umph
om ical
Ġad mir
Âł 1
ĠD rew
M art
ĠD iet
ip eg
ĠWy oming
Ġg ly
Ġmob il
in stein
ĠH ern
Ġprov ider
Ġfru its
al us
Ġbord ered
Ġnew er
Ġrecommend ations
- "
Ġre opened
Ġstret ched
Ġtrail er
O K
Ġpreced ed
Ã¸ r
m el
Ġfood s
ĠG iven
Ġendors ed
ĠBl air
io x
Ġdis orders
ĠT err
Ġcost ume
ĠM is
Ġr ider
w ill
ĠP R
b ot
Ġc ement
ar ound
rec ord
ĠDar win
g ood
Ġaccommod ation
l ied
Ġphil osophical
pent er
Ġsubt ropical
Ġcon sole
Ġfl own
199 3
ĠL il
ĠCorn ell
Ġancest ors
Ġmyth ology
Ġbal let
Ġ ĠĊ
Ġp ension
Ġhero es
ĠCarn egie
onn y
ĠR iley
Ġgot ten
ĠOffic ial
ll a
ĠHay es
Ġover th
Ġgrav ity
ĠV i
ĠMar l
ĠMov ie
Ġpat ch
ĠMal colm
Ġmass acre
se nd
oca ust
Ġcelebr ity
Ġsomet ime
Ġspir its
ĠL iam
ĠO st
c over
Ġsl ope
Ġstrict ly
ĠC hess
ĠT ake
Ġex pense
ĠEthiop ia
Ġa unt
Ġcarri ers
ĠStr at
ĠMer ced
Ġst int
itor ium
Ġneighborhood s
ĠJosh ua
Ġfre ely
all a
Ġloyal ty
Ġfemin ist
ĠHug o
ĠP Ã©
Ġavail ability
Ġrepe at
Ġm ere
Ġorgan isms
ĠEd gar
ĠB ren
ĠPre viously
ard e
ĠLeices ter
Ġun ity
Ġclass room
Ġf iscal
Ġ183 9
199 2
Ã± o
Ġcomed ian
og o
ĠC i
as is
nd ez
Ġcommun icate
ĠMar ian
aff e
ĠCong reg
ĠE aster
role um
ĠH annah
lit er
Ġexpl aining
ansk rit
ĠL if
ĠRe bec
ĠCur rent
ĠTh ames
ĠH ood
ĠYan kees
ub ble
Ġprin cess
Ġnarrow ly
ĠP eng
Ġautom obile
ar am
ĠNiger ian
il ateral
ĠCom mercial
P G
ĠCh al
Ġam alg
ĠG ospel
J apan
Ġo re
Ġl anes
ĠJess ica
ĠJul ie
ĠGael ic
as ma
Ġman eu
Ġfre ed
Ġreview er
pl us
Ġrein forced
ber ger
oc hem
Ġgran ite
m ons
Ġsn ake
Ġorgan izing
ĠMax im
Ġvol canic
Ġunder neath
ĠN u
t ail
il ogy
Ġmach inery
ĠT ennis
ĠR as
ĠB rom
ĠTues day
M ichael
Ġtr aced
The n
ĠG ur
im eter
ĠIn stitution
ĠPop ular
Ġmechan ics
ace ous
Ġcur ved
ĠC ustom
Un ited
g s
ĠBel le
Ġsub str
Ġviol ation
Ã¢ n
ace y
Ġen closed
ĠIndust ries
A ss
op y
Ġtransmit ter
le en
ash tra
ĠL ay
us a
ĠSh i
Ġlad ies
Ġinter ference
Ġdiv ine
um en
Ġw and
O D
Ġprec ise
oy a
Ġy e
ou b
Ġcry stal
Ġbes ides
ath am
el ic
cent er
asc ar
is ers
p se
Ġspread ing
ĠSc ots
An n
Ġd up
Ġst iff
19 60
ĠSlov akia
Ġinst antly
Ġwonder ful
M iss
Ġconv iction
Ġple ased
Ġd ign
Ġin ception
Ġenthus i
ĠD erek
Ġde er
Ġwebs ites
Ġl ens
Ġunder took
Ġrecon naissance
ĠMe h
anc o
ĠMet al
on ica
Ġ( '
ĠKn ox
ĠSoft ware
Ġevery day
ĠAm anda
con n
ĠF o
Ġro pe
re a
al ong
Ġn erve
ĠCharl eston
ces tershire
Ġem ail
ile e
Ġdef ines
Ġback up
I m
aver n
ĠTh anks
ĠAr n
Ġmarg inal
Ġthreat ening
Ġj ealous
ĠHer zegovina
Ġdes p
Ġrob ot
ĠKos ovo
ĠJ al
ĠShe n
Ġher b
part y
ĠLith uanian
Ġel imination
Ġmet all
Ġpl ural
Ġsh it
ĠCle ar
Ġdevelop s
he e
Ġpersu aded
Ġpartic le
Ġrequ ests
ĠTr avel
Ġ16 0
Ġcateg or
Ġ183 2
is ely
Ġrep ly
Ġsle e
Ġsit com
ĠS M
Ġdem o
Ġscreen ing
Ġmamm als
ĠMaced onia
ĠConstantin ople
Ġf iber
ĠN ixon
Âłm ph
Ġ184 2
Ġle ased
elect ric
ĠAnd ers
Ġcom merce
ĠB j
s il
the l
ĠSuper ior
ĠCraw ford
r ag
ar ag
Ġ ),
Ġfl ies
Ġde ar
Ġlect ure
ĠUl ster
i em
Ġb ol
T om
ĠLe y
urn ed
Ġre vel
W C
sc ript
Ġsp elling
Ġhealth care
Bl ue
ĠW inc
Ġind ie
os al
ĠNot es
let te
isc her
Ġm asters
ĠThe odore
ĠEll iott
ig i
Ġpartn ered
Ġautobi ography
f iction
Ġmet er
ĠBald win
Ġapart ments
Ġmon uments
ĠSc reen
ĠB agh
Ġint im
Ġfore head
Ġpup il
ĠL on
Ġdiplom at
Ġnurs ing
ĠWinn ipeg
Ġcru ise
or um
ĠStef an
ĠYugosl av
Ġbow ling
Ġhect ares
Ġshell s
ĠBur ke
Ġj acket
ad ic
ĠM aid
Ġris ks
Ġmod es
ĠY emen
sp ace
Ġw arriors
ĠÃ Ĺ
ĠNew man
Ġcongress ional
ĠC B
ĠG ul
Ġeat en
Ġdiam ond
ĠI z
ĠDiv is
at ri
Ġre ly
Ġjump ing
U P
Ġm ills
Ġ183 5
Ġequ ality
Ġenact ed
ĠC airo
ĠP or
Ġprofession ally
ent in
Ġb und
Ġsup ern
ĠR up
ĠRe agan
R es
Ġal umni
AA F
ch ar
Ġbutter fly
ã Ĥ
Ġinf ant
) ".
ĠCl ara
Ġmon op
Ġc it
lu ence
by e
ĠHer o
ĠR iv
Ġf ake
âĢĶ âĢĿ
clesiast ical
an ium
ĠB ronze
ĠCam er
ĠJohn s
ĠT otal
Ġchart ed
Ġinstruct ed
Ġcon cess
ĠS eth
Ġter rible
ĠBal let
st roke
ĠPlan et
Ġsatisf ied
Ġmeasure ment
yl on
ĠBu ilt
ĠTh under
Ġsuggest ion
Ġhar vest
ĠJane iro
R ol
ĠBav aria
ĠH ave
T ur
R oman
Ġqual ities
ĠH ann
ĠIn side
Ġenh ance
Ġreason able
ĠJohn ston
Ġexplicit ly
ec hes
ĠKenn y
Ġd ancers
ig nt
ĠWol ver
ĠRos a
M ic
Ġhom eless
umber ed
ĠH oll
Ġreg ret
Ġem issions
h uman
Ġwhe at
Ġfin ite
Ġann oy
rew s
be it
Ġun m
Ġc ivic
ĠAlger ia
ĠClass ical
R NA
Ġadv ances
ĠWe i
ing e
Ġvac c
Ġterm ed
at ro
ĠCal vin
Ġdel ight
p resident
Ġbo om
ĠSouth ampton
ik er
s ay
Ġp ant
Ġs od
Ġb ra
ĠLouis ville
Ġextra ordinary
col span
ĠS ard
A lex
Ġcheck ed
T H
Ġfin est
ĠS ap
ĠLear ning
ĠK ot
Ġab rupt
Ġcountry side
Ġcho ices
ĠRebec ca
Ġsevent een
Ġg ig
Ġover see
Ġscreen ed
Ġcert ification
s ome
Ġanti qu
hy dro
Ã ½
Ġcommission er
b eck
Ġd ug
ĠD rug
Ġappe aled
Ġ1 18
Ġrock y
ĠR id
Ġsem in
ĠBund es
ist ically
ĠRock y
ĠMarsh al
Ġprov iders
Ġinc om
Ġsk illed
Ġacc redited
Ġrail ways
Ġan k
ĠStep han
in ate
Ġdesign ers
ĠB erm
Ġcorrespond ence
Ġdet ection
ing ing
Ġbicy cle
ES CO
Ġf us
Ġam endment
Ġwel comed
C ity
ĠF alk
Ġch ron
ĠWin ston
Ġ umb
Ġf usion
ats u
ĠTr ue
ĠW C
ĠGram mar
Ġlater al
ĠMong ol
ĠN ass
Ġexpect ations
ĠDev il
Ġ184 3
Ġdisp utes
ĠW onder
ĠN iel
ĠBeat les
" ",
om al
ĠA ven
Ġ ~
ĠH ab
g age
Ġf ears
ĠT ru
Ġch in
O ur
P resident
199 1
ĠN um
Ġenl arged
ĠRos en
play ing
Ġmission aries
Ġst arter
ĠV it
wid th
E G
ĠS ons
Ġteac hes
Ġcompl ained
ĠA chie
ĠFranÃ§ ois
ĠDr um
Char les
onn ell
e ur
ĠK ad
Ġstrugg les
ĠChile an
ĠK eep
w rote
Ġed itors
Ġteen ager
D an
Ġtub es
art ime
M D
ĠZ ion
uk u
omm ission
Ġcoordin ates
ĠL ut
ĠWe ather
al ore
Ġment or
Ġv est
Ġpros ecution
am ous
Ġsim ul
Ġimmigr ant
Ġlic ence
m l
Ġinter rog
Ġexpert ise
ĠMichel le
ĠSpeed way
ĠH ors
Ġpost p
Ġnob ility
at aka
Ġfresh man
ĠTh ings
Ġinst ances
Ġstrong est
ĠH ut
ĠPr ussian
u ine
ĠUS S
it ate
ĠH il
Ġsett ling
ĠB elt
res hold
Ġfram es
Ġequ ations
W ith
ĠMar in
Ġsur veillance
á ¸
Ġc rafts
Ġsp awn
s im
ĠT ell
Ġtrain er
al ie
ĠGod d
Ġsaf ely
Ġconsec rated
Ġfr ight
ĠS it
ĠSt alin
Ġacc ent
pro f
ro ve
Ġinstit utional
ĠM oney
ĠG overn
Ġcollect or
Ġas leep
Ġsoph istic
Ġweak ness
M el
Ġfund ra
Ġhigh ways
Ġtermin ated
Ġal ly
Ġtrans mitted
ĠDor othy
Ġd well
Ġrec all
leb rit
atic an
am er
ĠKash mir
r ays
ĠB un
Ġsl ip
c hel
ĠY uan
Ġfe ver
r ice
ĠHel ena
Ġver t
rox imately
ham med
en ic
ĠRec ording
Ġprot ocol
Ġsh aft
ĠProgram me
Ġs her
Ġfl av
Ġfirm ly
ĠL ip
ĠSm ashwords
Ġpath s
Ġgeomet ry
Ġsp here
ain es
Ġcommand ers
Ġaddress es
: #
ol in
any a
ĠP ars
Ġspac ecraft
s u
Ġdecor ative
Ġin quiry
Ġcor rel
Ġprof its
ge ons
e apolis
Ġbr ass
Ġdo zens
N ote
is ure
Ġst ir
ĠLud wig
Ġexp enses
ĠCase y
lebrit ies
ĠStre ets
ĠMalays ian
Ġliv estock
ĠB har
ĠO pt
ĠÄ Ĳ
Ġfoss ils
! ",
ĠTri p
Ġcogn itive
ch ant
ili ation
Ġcons umed
L ive
T wo
ĠK re
ĠJul ius
ĠJo el
Ġlink ing
ĠB att
d ec
amb a
ĠAT P
Ġund ers
arri ers
Ġstr ain
ĠApp e
Ġportfol io
Ġcomplex ity
ĠPict ure
ĠS uk
ĠSher man
Ġenc ounters
Ġschem es
Ġinv ention
eli hood
Ġres on
Ġ[ ...]
Ġref urb
ĠCour se
ĠQu inn
or ters
Ġcolle ague
Ġbl ame
b ling
ĠInd o
Ġaccept ing
K A
ik k
r imin
H y
Ġch assis
ag ogue
Ġp istol
bre aking
ĠSy rac
Ġillustr ations
Ġhe ating
unn els
rell a
ĠNew found
ĠCarl o
Ġmar itime
ĠM oor
Ġtrack ing
ĠNAS CAR
Ġremark ed
s burg
i w
Ġju ven
ĠS ed
ars ity
ĠTreas ury
Ġcapt uring
Ġth y
g irl
g eneral
R ep
ĠWW E
Ġeth n
Ġmeasure ments
ĠCol ony
es que
ĠSp ect
ir ling
in isc
ĠUnd erg
Ġf ence
Ġm ock
Ġw arrior
ost ic
Ġsubstant ially
ĠDub ai
Ġinvest ments
ĠB ast
ass ic
Ġsupposed ly
ĠL ily
ĠCo ch
Ġhe aling
ĠAl most
Ġp orn
Ġr iot
ap or
Ġdrain age
ĠAl g
ib a
Ġcyl inder
Ġcomb ining
Ġsimilar ities
t itled
ĠY ard
ĠL ap
ĠTrin idad
ĠL LC
ĠAm ateur
ĠC ool
Ġteam ed
ĠF erry
Ġo urs
cl ip
C omp
d ad
an an
En ter
P ac
ĠU z
ĠBur ma
âĢĻ ,
Ġ9 00
Ġdestroy er
ĠDe ut
W S
Ġtheat ers
Ġemb assy
olith ic
Ġappl ies
Ġass ert
ĠSc andin
Ġbroad er
c idae
Ġw agon
ag ged
Ġs ued
Ġtel esc
Ġsc orer
Ġl ac
Ġbl amed
Ġr ip
th ird
ari at
ĠR az
M o
cl air
Ġch aired
ĠC ay
ĠCom bat
Ġutil ized
idd ing
Ġg ains
ĠF ur
ĠK erry
Âł p
Ġstat ues
g ency
ĠEd win
ĠKrish na
Ġout s
Ġexcept ions
ĠRaj a
Ġcho osing
act or
w yn
other ap
Ġcelebr ations
ĠOver all
ink i
Ġquant ity
Ġemploy er
ĠAberde en
ĠWals h
ĠBud apest
ro b
Ġto ile
Ġpe as
ĠV ish
Ġprog ressed
Ġmist aken
Ġdescend ant
c ourt
ĠâĢ Ļ
Ġequ ity
Ġres ided
B a
it ars
N R
' )
ĠSic ily
ĠPar agu
ĠDou ble
Ġgram mar
Ġgarn ered
is or
ĠInsp ector
n ormal
Ġviol ations
fore st
Ġcle aring
ĠG ates
Ġintellig ent
ĠY a
ĠSant os
ĠS ind
Ġship ped
Ġpurs uing
ĠV iv
Ġinc orrect
Ġlack ing
rit z
at z
ĠZ en
aged y
ĠT yr
cl iffe
Ġec osystem
t w
ĠH ank
T unes
ĠAndre a
ĠIns urance
ĠP ere
Ġam azing
Ġvol cano
Ġinvestig ating
am by
ĠX box
Ġph ases
ĠD art
le igh
ĠCh o
Ġf ant
Ġatt ained
ĠV in
. ),
ĠR ox
S il
C r
Ġper cussion
Ġconstit ute
g ree
commun ications
ĠR ica
ĠGre ene
ĠUtt ar
Ġr ic
ĠBrown s
ĠStat istical
Ġgl ob
ĠL ed
pher d
Ġcomb ine
ĠR T
ĠAppe als
Ġshr ub
ĠAsh ley
u ana
ĠS elf
ĠK ids
Ġtal ented
Ġloan ed
Ġsp un
ne um
ĠEm ploy
ĠS ugar
Ġt ar
Wh ite
Ġche er
Ġanth ology
j ord
Ġexclud ed
Ġsh aking
Ġsp y
ral tar
Ġteach ings
ĠNewfound land
ol ving
Ġinf ected
Ġprol ific
ĠSyrac use
ard ment
Ġp ir
or ian
Ġb ark
ing en
ĠE ye
ĠPhil harm
Ġtu ber
ĠBr as
ĠL arge
Ġwarr ant
ram id
ĠC ul
au f
M ac
Ġde pr
Ġth umb
F rank
ĠM ob
ev o
Ġmoll usk
Ġrow s
Ġtox ic
Ġparam eters
U p
Ġcycl ing
im i
ĠCr iminal
Ġl ov
ab ul
Ġsm ugg
Ġst ance
Ġen abling
ĠStr ong
F S
os ion
ĠB ri
ĠSand y
Ġencour aging
ip el
Ġlegit imate
H a
ĠMax well
Ġsand stone
Î »
Ġinform al
ignt y
ĠChief s
Ġcorn ers
Ġmetab ol
B re
ĠP all
ĠPatri ots
Ġdiagn osis
Ġeng aging
Ġapp lying
ĠCount ies
Ġrank ings
ĠMathemat ics
Ġl od
ĠV ery
Ġvolunt ary
Ġupr ising
Ġwaters hed
m ud
ĠAd olf
erg arten
Ġhall s
Ġcompar able
ĠGriff ith
Ġval ued
aun a
Ġpro c
Ġplay wright
Ġb anner
Ġd ome
mar ine
ĠCh am
ĠTh r
Ġche ese
ĠAr ms
oc es
ĠK iss
Ġdif fers
Ġres olve
Ġdist ances
ĠHol ocaust
pl ant
at isf
Ġthe or
ĠSum mit
Ġmel od
Ġly ric
he art
spec ific
arth y
Ġg ren
Ġins ect
re ation
ĠUrugu ay
ĠMinn eapolis
ĠB ash
Ġcorpor ations
Ġch ase
Ġcann on
Ġstri ker
Ġre ef
art e
led on
Ġref lection
Ġadj oin
U R
n amed
Ġteen age
ĠObs ervatory
Ġenc oded
ĠStat istics
ĠFl ag
ĠL af
et z
ch urch
ĠD ong
: "
whe el
arri e
igr ation
Ġover head
ĠAd ult
Ġelectron ics
ĠH omer
cl amation
Ġdiscuss ing
ĠConc ert
Ġrecre ation
Ġjew el
s pring
ĠCon stitutional
ĠEuro vision
Ġs ab
Ġ10 2
Ġreg ained
Ġb tn
cont rol
Ġhe ated
Ġb ust
Ġcont rary
Ġpri zes
ĠOut side
Ġcour ty
Ġchar itable
ĠD ock
198 9
Ġnever theless
ĠJ i
Ġfail s
Ġcontribut or
Ġas c
d ig
ĠEd ge
b red
Ġhapp iness
ĠS E
Ġout fit
Ġim per
Ġsn apped
que z
Ġw ards
Ġl iner
Ġreflect ing
d ep
ĠMon th
Ġrevers ed
Ġpow der
ed e
ĠGl ac
ad vant
ĠAr ist
Ġan at
ĠM eyer
ĠM ile
Ġse as
Ġb arg
Ġpl aque
Ġimpro v
Ġbomb ers
Ġdoctor al
Ġinteract ive
ody nam
Å Ļ
ĠLeg al
Ġe ager
ĠP os
Ġfro zen
Ġdesper ate
Ġcorrespond ent
get own
Ġport al
ĠPier ce
Ġ18 15
ĠG M
Ġmat hematic
Ġexc it
ĠA G
Ġorg ans
ĠC od
H O
Ġpubl ishes
ĠV atican
og ene
ĠH ond
Ġaest hetic
ĠR ather
Ġshow er
Ġconsult ing
Ġconstit uted
Ġd ens
Ġst ems
Ġtact ical
Ġremn ants
Ġpen alties
eg ro
Ġreven ues
Ġcompet itor
Ù Ħ
Ġrest r
ĠCh oice
Ġst ip
Ġse ated
Ġsw orn
Ġsket ch
Ġplat inum
ĠMan ufact
h aul
ĠMay a
Ġsystem atic
Ġab d
ĠT rou
Ġresemb le
Ġtradem ark
op ed
ĠHeavy weight
P eter
ĠC rom
Ġconstitu encies
ĠHam pton
ĠNort heast
Ġquant ities
ĠBro ck
tain ing
ent ric
us ually
ĠR ao
c ro
j in
ĠOn line
ĠF iji
f red
Ġtend ency
ĠF let
Ġst un
Ġfav ored
Ġdoll ar
ĠWhit ney
Ġc uis
Ġpe aking
Ġcomm ands
S ome
ing le
Ġch ances
Ġey eb
Ġab olition
Ġtraff icking
Ġbox er
Ġshow c
Ġdef ault
C he
Ġd ent
Ġwh it
Ġcontact ed
oc o
amp h
cont rolled
D own
ĠJ as
ĠBat man
ĠP u
Ġtend s
Ġdial ects
Americ a
ag ascar
Ġj ersey
Aust ral
ĠBer ry
Ġh ood
ĠCont in
Ġp m
Ġtransl ations
Ġvill agers
Ġm es
mit t
er ical
Ġcr ater
Ġse greg
Ġat op
Ġsh apes
ĠSomet hing
Ġupgr ade
Ġtransl ator
Ġun h
ĠCon sequently
udd y
Ġcouncil s
Ġadvent ures
ong s
iz a
ĠSh ane
ĠZ ach
Ġdark er
up t
Ġexcess ive
Ġdiscipl ines
B N
Ġbroad caster
ĠHous ing
ĠSte am
ĠU FC
ĠInn ov
Ġre hears
ĠCl oud
Ġun official
Ġsec uring
ĠH ort
Ï Ģ
Ġac ids
Ġf itness
P art
Ġdeliber ately
em ia
b ay
Ġspect ators
Ġupd ate
ĠPl us
Ġattribut es
ĠG an
Ġgu idelines
Ġl ane
J ournal
ĠS anskrit
ĠFergus on
ĠAr r
ĠSh am
Ġpot tery
ast on
Ar thur
Ġrein forc
Ġi Tunes
ĠAngel a
Ġwick et
Ġalign ment
Ġsubmar ines
l ore
Ġsent ences
Ġf a
ĠGr aduate
Ġknock out
Ġprin ts
ĠMir anda
oot s
Ġam end
Ġm ouse
Ġret aining
Ġw artime
ĠCh ange
isc he
Ġsan ctuary
. ).
ĠAcadem ic
Ġ183 4
Ġsh rine
est ead
ie ve
lam m
z ym
Ġunemploy ment
isc ount
l av
bu ild
ĠHard y
Ġcru iser
Ġuniform s
ip zig
Ġlaugh ing
ĠAir craft
Ġdec oration
ĠB ene
et erm
ĠIn iti
ĠMer it
Ġdrop s
Ġplant ation
ĠLeban ese
Ġcou pled
Ġmat ched
Ġtechn ological
Ġlength y
ĠMerced es
Ġdam ages
Ġcontest ant
Ġdrink s
Europe an
ĠCer amby
Ġimm une
ar se
bl ack
ĠMar qu
ĠUC LA
Ġst alk
ĠSal em
ĠChe ng
ĠCauc as
Ġopt ed
ĠP resent
Ġarch ives
ĠSt rait
p ot
Ġce lebrities
ĠMar co
Ġh atch
od ied
Ġspec ially
ĠTrib une
Ġrem ake
in qu
ĠLin ux
Ġregul atory
Ġdors al
Ġgovern ance
ĠTasman ia
ĠRaid ers
ĠPr iv
ĠMar ÃŃa
Ġp el
ä ¸
ĠAI DS
ĠInd eed
ĠPot ter
ĠKazakh stan
Ġsc ared
f und
Ġ( $
ĠWill ie
Ġmatch ing
Ġs ir
iat us
ĠS ylv
ap o
Ġter restrial
ĠK om
ĠF ork
Ġmoment um
Ġend e
Ġse aled
Ġreal ised
Ġs tern
ĠD re
ĠCop a
the y
ĠMag gie
and i
Ġdec ommission
Ã¢ t
E r
ment ed
ĠAg u
Ġtend ed
Ġconcentr ate
Ġdisch arge
ĠCreat ive
ĠSof ia
Ġw age
Ġstream ing
ĠCeramby cidae
ĠL ing
âĢ ĺ
Ġreg ulated
Ġweaken ed
Ġadvis ory
ĠS ally
ac ritic
Ġ18 14
Ġlaunch ing
Ġm isc
Ġdoub led
Ġmel ody
ĠM ater
ĠChe v
count ry
ĠDe e
Ġpl enty
Ġpl acement
ĠAnd rÃ©
Ġpublic ity
Ġclean ing
ĠD uchy
Ġpriv acy
ĠC ancer
c ats
ĠAt hen
Ġsm iling
Ġident ifying
ĠGuatem ala
Ġde an
L E
Ġ10 3
ĠSacram ento
ĠBr andon
ĠGib raltar
nt on
ĠCla ude
ĠLis bon
Ġcomput ing
ĠFem ale
Ġmand atory
Ġguarant ee
C ont
ĠThom son
ĠT ah
ĠH ook
Ġd awn
el ves
Ġdiss olution
ĠMahar ashtra
s ection
ĠL or
ik s
ĠJan et
Ġtrust ees
C R
Ġimpl ies
H P
ĠN urs
Ġadequ ate
Ġgu ilt
Ġt ightly
ĠLa ur
ĠSuff olk
ul in
ĠConc ord
ĠMar cel
Ġge ographic
ĠFel ix
ud er
ew ater
ĠFull er
bl ock
Ġseason al
er os
Ġch icken
ĠE lection
Ġpr inc
ĠHol ly
Ġb ab
Ġsquad rons
Ġreform ed
Ġin ver
Ġt ang
ĠUN ESCO
ĠJack ie
Ġbus h
ĠC ock
St ate
v iv
ĠGre ens
Ġcru el
Ġc ass
Ġin ch
Ġshout ed
Ġintegr ity
Ġsoft ly
o qu
Ġh alt
ĠL ook
Ġoccup y
Ġrest ing
Ġfulf ill
ĠCa esar
Ġvill ain
Ġtro op
Ġpubl ishers
ins k
sw orth
Ġobs erve
Ġcoin ed
m are
Ġsp ear
Ġo ath
ĠEm il
ĠMar itime
Ġsl ide
Ġdam n
ar f
Ġabb ey
Ġt ales
Ġflood ed
olog ne
sh ine
Ġ* **
Ġa ided
Ġcur ves
Ġpan ic
Ġp aved
ĠRes p
ig ion
Ġcont ing
br anded
Ġanticip ated
Ġpre ference
Ġr ust
Ġc ort
ĠN one
rah im
Ġ ell
Ġp ic
ĠMid land
ĠH undred
] .
Ġper ipher
ĠNic ol
ĠAfter wards
ĠD ul
B ook
Ġevery where
Ġtonn es
ur ai
ep pe
b en
Ġreg ards
ĠHum ph
Ġmod ifications
Ġinsp ection
head s
ĠGu adal
S up
Ġposition ed
Ġfe ast
C or
ĠPop ulation
r ors
Ġaffili ation
Ġcheek s
Ġincorpor ate
Ġchrom os
be ing
Ġsed iment
ĠErn st
" /
br is
Ġ183 1
Ġmigr ated
Ġshe ets
v als
Ġaff ection
Ġb its
ĠTanz ania
Ġac ute
as ive
somet imes
Ġste ering
Ġlimit ations
om ore
20 18
Ġf res
Ġrelig ions
Ġc raw
ress es
iz able
Ġw ives
Ġth reshold
ĠC umberland
Ġins urg
Ġcomp ass
ne z
ĠT ian
ĠBor is
ros se
Ġabsol utely
ĠSerge ant
ĠPe g
ĠH ul
Ġeduc ator
Ġt et
M in
Ġfresh water
ĠBel ow
Ġpresum ably
ĠM ald
sh op
Ġread ily
Ġsubsc ript
Ġdifferent ial
load ed
ĠAugust us
l ov
ĠRe in
ug a
Ġdeterm ination
F rom
iformes Family
ĠAm b
ĠMon ument
av ity
ĠP M
H is
ric ia
Ġcompl aint
ĠEvery thing
Ġmid night
ĠTel ugu
ĠV ander
Ġsum mar
Ġscre ens
ĠHonor ary
Ġsn ails
Ġmand ate
c ity
Ġstri pped
ĠK aw
Ġc ried
Ġshould n
iss ued
Ġtask ed
Ġto oth
ĠB uk
Ġsail ors
unc iation
ĠHigh land
Ġb omber
re qu
ĠK ind
n ian
Ġsk ating
m atic
j iang
Ġavo iding
Ġh ated
ĠK atherine
Ġ10 4
ĠF antasy
198 8
Ne ill
Ġrif les
Ġpure ly
ĠTe legraph
ĠBre ak
Ġfilm maker
Ġw rist
ĠH ast
Ġmin ers
ent on
ĠEmp ress
ĠWeb b
Ġdec iding
Ġaffect ing
Ġeffect iveness
ĠProv idence
run ning
Ġprotect ive
ĠS ikh
ĠSil va
oot ing
ĠTra ff
P D
ĠBol ivia
to ire
ĠHein rich
ĠL uck
Ġgr inned
Ġd y
iÄ į
ĠEduc ational
U K
Ġprot esters
Ġfore wings
Ġext ant
ĠSoph ie
Ġmix ing
l ook
Ġp ants
am ar
Ġcl iff
l is
ĠSe g
Ġham mer
ĠChen nai
Ġscholar ly
ĠBudd ha
ĠD owntown
k ward
Ġgener ating
ĠCow boys
Ġpick ing
ĠNort on
Ġboot s
Ġsup erm
Ġhigh lights
ĠPl ains
Ġspr ings
ĠP irates
ĠRif le
Ġan arch
ĠSen ators
Ġembed ded
ip linary
ĠMad ras
ĠK och
Ġche ap
board s
ogen ic
ĠIn tegr
ĠBul ld
ĠD uff
ĠCar son
ĠDr agons
en za
Ġcoordin ator
ĠKarn ataka
if a
Ġdis hes
ĠCommun ication
Ġdis advant
Ġmet eor
ĠT ank
iv ities
Ġprec urs
L R
anth a
Ġen ables
c amp
ĠP itt
ĠJeff rey
Ġt unnels
ĠF iction
Ġcl o
Ġcommercial s
Ġdisapp oint
H el
Ã¨ s
ĠExcell ence
Ġev angel
asc ular
Ġcorrect ly
Ġisol ation
Ġund ef
u ity
ĠM Äģ
ĠG A
Ġdram atically
Ġfin ishes
ĠMad agascar
Ġaccept able
ĠQ atar
c ope
Ġspec ulation
Ġfinanc ing
Ġsurvey s
Ġcommemor ate
ĠS ag
n u
ll er
atter ing
ĠNor wich
Ġsan ction
Ġl ion
e ated
ĠCzechoslov akia
ĠInd oor
g ang
ĠWat ers
Ġc um
Ġrid ic
ĠS tern
ĠPol y
Ġsovere ignty
Ġabund ant
ĠW id
Ġwood land
ĠRol and
ĠHy der
ĠEmer gency
Ġsid ew
ic ist
iz ers
ĠTerm inal
Ġun ch
Ġer ect
iss ues
Ġdeterm ining
Ġveget ables
Ġfeed back
Ġin eff
ĠV all
f ig
ĠB ody
ĠW imb
inn ings
a uth
ĠBeng ali
Ġhar bor
Ġpart ition
Ġcom eb
Ġ3 000
Ġ183 3
Ġv end
ĠG ut
f unction
Ġsm oking
ĠW ilm
ĠC ore
H ere
l oo
ne g
oin ting
ĠMon ica
ĠCon stit
Ġdisapp ointed
at hetic
ĠGand hi
ĠEv a
ĠH ack
Ġd uck
g reat
ĠTh an
ĠConf ederation
Ġbet a
ĠCor por
l ance
May be
C ount
Jos eph
ĠCare y
Ġprom ises
Ġdispl aced
ĠD ixon
Äģ d
ĠHawai ian
v oy
igg ins
z an
ĠPl ain
it ivity
Ġcool ing
Ġide ology
ĠThe ory
Ġ ).
ĠJ ag
at um
am on
Ġs or
Ġdeleg ate
Ġconsolid ated
rap hic
Ġbag s
Ġshort ened
Ġrem inisc
Ä ħ
ĠM ikh
ĠBomb ay
O s
ĠH ence
ĠCo ff
Ġmet als
ĠRuss ians
ĠPart ners
ĠPatri arch
Ġrad ius
Ġamph ib
B y
ĠMort on
ĠE rik
Ġresemb les
et ian
ant o
Ġbe aches
Ġa ug
ters on
M ed
N or
le ted
Ġcomment ator
ĠPant hers
Ġodd s
Ġclass rooms
Ġtra its
ĠJ ill
pe x
ĠCast ro
ĠVol ume
ĠW ik
are l
Ġexpl oring
b ably
hard t
ĠAchie vement
ĠAssoci ated
ron ics
B ro
Ġsing ular
Ġwire less
B o
ĠMy an
G reen
ĠEth an
ĠGard ner
ĠGar c
Ġtax i
ĠSlov ak
ĠB ess
Ġshoot s
v ir
ĠH ed
Ġposthum ously
Ġwas hed
Rich ard
ĠJud a
ĠChronic le
V C
Ġgl ance
198 5
ĠR he
ĠFlet cher
Ġteam mates
Ġsu ite
C hic
Ġo wing
ĠN ed
Ġde bris
Ġcult ivated
Ġconf ined
Ġfil ter
Ġpersonal ities
ĠF est
ĠHaw ks
Ġdom ains
w elling
ĠT oul
cl ub
ĠLaw s
ĠL al
Ġplan ets
Ġtal ents
sk irts
Ġexcept ional
Ġsucceed ing
Ġincom plete
ĠAl m
g ence
ĠW ander
Ġins ufficient
ĠS iber
Ġ10 6
Ġmed ic
ĠTre vor
ĠIsland er
ĠD awn
Ġn ave
Ġat omic
Ġ Ø
Ġamb itious
ĠMP s
ĠHels inki
Ġaccept s
Ġevac uated
es p
D M
od s
ĠTur ks
Ġl oses
ĠEvery one
im ar
uc a
198 7
Äģ b
k al
Ġl ith
Ġpress ing
Gr and
Ġrecommend ation
ĠLe ipzig
Ġl ucky
ĠR andy
Ġaccess ed
Ġgener ic
Ġgen uine
Ġf art
ĠVern on
Ġc ov
so ver
d ict
ĠMyan mar
ĠMo hammad
Ġun rest
Ġele venth
f ilm
D ie
ĠF ut
Ġalt ogether
Ġadvoc acy
ĠToy ota
oc he
Ġs igh
ĠB order
Ġfront ier
Ġtw elfth
ĠW ade
Ġpeak s
Ġsub mer
ĠOl ivia
ĠSt oke
ĠSax ony
Ġautonom y
W ar
it ical
Ġrem inded
Ġware house
Ġdeal er
ĠBol ton
Ġmon k
mid t
ow l
ern er
ĠS T
A fter
ĠF an
ade qu
ry ing
Ġcomplic ations
Ġf ol
ond uct
ĠÄ Į
z on
Ġfrequ encies
ĠS ou
D aily
ĠF ed
lic ation
di ocese
Ġcult ivation
Ġh orm
ĠL ub
ĠMet acritic
f ar
Ġcons on
ĠAut o
Ġannex ed
Ġdesign ing
Ġdoor way
Ġintent ions
l ation
Âł ...
z el
ĠGeor getown
Ġemploy s
Ġscreen writer
Ġmot ivated
Ġd ances
ĠSpec ies
Ġfier ce
ĠO ften
vers ion
ĠNorth western
Ġbe ats
ec ute
Ġj am
Ġconsequ ently
ĠProg ress
Ġlandsc apes
Ġfaith ful
ĠT ul
arm ed
Ġgr in
te e
w al
Ġw ages
New s
ĠWimb ledon
ul ent
id ian
ĠM Ã©
Ġsc rew
Ġm ath
Ġelev ator
Ġj oke
ĠD ion
ĠWor cester
fr ame
ĠEngine er
ĠE t
Ġdem olition
ĠHe y
ob o
Ġch ocolate
ob ic
Ġan the
Ġh ab
Ġd warf
an as
Ġdec ent
Ġins criptions
Ġin ev
Ġdec isive
ĠM Ã¼
own ers
Ġpl ed
sh aw
ĠBerg en
ĠSc he
ak y
Ġsh ake
ĠSh aron
Ġcloud s
Ġsu ited
Hen ry
ĠK oh
Ġsex ually
en stein
g art
Ġen zym
S ur
ron es
h orn
ĠPle ase
ĠEurope ans
ĠM ix
oph on
Ġadvant ages
ĠSh iva
Ġovers aw
ĠEston ian
ri o
ĠAd mir
Ġkidn apped
ĠRever end
ra ul
Ġportray al
Ð ²
M ark
ĠJ ets
Ġyear ly
ĠR ican
Ġencompass es
ĠH its
ĠPh arm
Brit ish
Ġtr igger
Ġun aware
ĠW ins
Ġfellow ship
I G
ĠB irth
Ġs ake
Ġinc ons
ĠV augh
Ġout skirts
ĠBu ild
ar ius
ex pl
Ġso ils
ĠTr uth
ĠKle in
ĠW ick
Ġcomeb ack
Ġspr int
Ġtw isted
Ġp ep
at u
Ġtim ing
I l
k u
ĠBoy d
ester day
em i
erv ille
Ġgr aves
ĠGar cia
Ġtri angle
ĠK od
ĠPap ua
Ġcat ches
it he
z burg
ĠW i
Ġf oster
198 6
f i
op ter
ourn ey
ĠG ross
Ġover time
ĠMad onna
Ġbreak through
k n
Ġst amp
ĠSm art
Ġens uing
Ġd ried
omet ric
Ġemploy ers
Ġch airs
ep p
Ġnew sc
Ġblood y
l arg
Ġfac to
ĠRaf ael
field s
ĠChem ical
urg ical
gu ard
N E
Ġst amps
ĠLe one
Ġwhere by
ĠSing le
Ġp ent
Ġsupp ose
Ġnarr ator
V al
ĠF en
pro duction
Ġb ite
Ġp aired
Ġst ained
Ġass erted
Ġanx iety
ĠNo ah
Ġbur nt
Ġeng r
Ġhuman itarian
un i
Ġf ut
ib ia
Ġrig id
ĠM atch
ĠV ed
ĠBuck ingham
Ġref use
Ġded ication
ĠK olk
Ġincorpor ates
Ġdis cl
Ġg ut
Ġstead ily
Ġemphas ized
ĠTe ams
Ġvalley s
ĠCole man
Ġexpect ing
t ures
ĠChap man
ĠJen kins
ĠAll ies
Ġcoll ision
ĠSant o
ig uous
ĠMar athon
r ab
Ġuncom mon
Ġpurch asing
ĠH ost
Ġsophistic ated
ha o
ĠC ologne
Ġpract ically
ĠK iev
Ġsuperv ised
Ġpoly mer
Î ¼
ĠLat via
Ġfunction ing
Ġir rit
ĠSt ories
T ER
Ġd ys
ĠW S
ĠX avier
ant es
ĠJ iang
Ã¡ ndez
Ġsovere ign
Ġret ros
c yl
s an
Ġform ations
ort al
Ġinc arn
bo ats
on er
ĠPhys ical
Ġtens ions
w y
st ones
P I
n ational
ate ful
ĠS D
ĠEle anor
itro gen
it em
bour g
ier i
Ġcre st
Ġcourty ard
Ġkid ney
Ġcott age
Ġs acked
ĠC otton
ĠM VP
Ġto y
ĠDivis iÃ³n
Ġadd itions
Ġbreak down
ĠG ian
Ġen velop
ĠCamer oon
Ġb ail
Ġborrow ed
Ġabbrev iated
ĠBey ond
Ġlo osely
ĠChem istry
Ġ18 10
Ġimag ery
s ite
ar ra
E nd
ic ating
Ġwond ering
Ġval ve
pr ising
Ġexecut ives
hist oric
ĠTit le
Ġuncom fort
ĠS ue
Ġ18 25
ĠL ars
ĠBad en
ul ative
Ġill umin
ĠCher ry
ĠJ enny
Ġeth ics
ore n
b ons
w ara
ĠGeor ges
Ġens uring
ĠTibet an
Ġdri ft
ĠR CA
sh a
." "
Ġam ino
Ġcivil ization
Ġneighb ors
c ot
le ading
Ġmass es
ĠZ am
S k
ĠG unn
Ġaster oid
Ġlist ened
ev iÄĩ
È Ľ
ĠL ines
l ide
ian ces
art on
ĠT in
Ġm im
ae us
ĠPhilharm onic
P op
o ine
Ġs inking
ĠVolunte er
Ġvac uum
ow o
ĠBrit t
Ġprof ound
ĠZ amb
Ġprevent ion
Ġun ified
Ġmother s
Ġtre asure
ĠL och
Ġsymb olic
P lease
ĠC ao
Ġsub tle
J ew
air d
Ġlay ing
ber ra
Ġcolleg iate
Ġd iox
Ġmon archy
Ġs ings
Ġswe at
Ġh ire
Ġdec omp
ĠHistor ically
Ġo val
ĠN uclear
ĠG eneration
b rown
ĠP ione
Ġre duces
Ġancest or
Ġche f
ĠP ale
ĠTr acy
ĠArch ives
198 4
â ĪĴ
it ational
ĠR ip
ĠJackson ville
ĠS U
Ġcanc eled
Ġcomprom ise
Ġ {
ĠColomb ian
ÃŃ s
erm o
ĠB ates
Ġan onymous
Ġsurv ives
ĠLeop old
ge nder
ĠT ucker
lim ited
Ġcompat ible
ard ing
S E
ĠL ik
ĠK Ã¶
ĠI X
Ġcont empor
Ġterror ism
Ġmodel ing
Ġprim itive
ĠK ens
ĠLib ya
Ġin equ
198 3
Ġrel ied
Ġj ack
N L
ĠEv an
Ġprecip itation
ĠF ri
ac ies
og l
ĠM ake
ur ia
Ġinc omp
Ġnegot iated
Ġret reated
Ġf aint
Ġm ast
Ġgall eries
Ġcuis ine
19 50
ĠHam mer
Rol ling
Ġn it
Ġcerem onial
ĠH onda
ir s
ipel ago
Ġb inary
ĠR ule
Ġins ight
d el
Ġbats man
Ġingred ients
Ġ" -
ĠCitiz ens
ĠCambod ia
k ok
ul ine
Ġpione ering
ĠEx eter
Ġgu itars
Ġreal istic
Ġmot ors
ĠHy de
ĠR otten
Ġsen ator
M c
Ġmot to
ham pton
N O
ĠFre eman
Â ½
ĠHaw k
o ids
ĠCon rad
oc y
ĠO le
Ġunanim ous
Ġdemonstr ations
Ġlingu istic
Ġconf isc
Ġa uxiliary
ĠEl is
ĠT unnel
ĠBre nd
ĠB ard
ĠParam ount
S er
ĠM orm
ĠPhill ip
Ġoff shore
Ġdef ining
ĠT aj
Ġaw kward
ĠSol ar
ĠIs s
Ġincorpor ating
ĠW it
ĠS ib
hy a
Ġco eff
ĠV ision
Ġvirt ue
Ġopt ional
Ġsup ers
ĠN O
row th
Ġtelev ised
Ġgu err
ob by
Ġc ats
ĠNorm andy
ĠVict ory
Ġm ourn
ĠK ai
ĠN H
Ġcomb ines
ĠConserv atory
Ġguarant eed
ĠIniti ative
Ġsque ez
ĠS iles
Ġhel met
K O
ĠEn s
d rop
ĠBe au
Ġh iatus
d istance
ph al
e ight
Ġinter red
Ġtouch ing
ĠH uss
Ġswitch ing
ĠMonten egro
Ġmon key
ĠDod gers
Ġpl asma
tle ment
Ġesc apes
Ġdet ention
Ġinherit ance
Ġvis itor
ott i
ĠK err
Ġout comes
Ġsubject ed
he ed
Ġesc al
ex cept
ĠSid ney
Ġmaid en
Ġattract ions
ĠQu art
il ib
Ġforb idden
Ġclin ic
Ġnucle us
Ġhe al
Ġl ighthouse
a ic
Ġrent ed
p al
Ġexplos ive
ĠHa iti
ĠP aper
ĠL un
Ġexam ine
B et
erv ice
Ġadv iser
Ġde ity
Ġth igh
ĠM LB
ĠRe b
Ġ18 21
Que en
ĠN E
Ġcycl one
ĠAst ron
Ġcampus es
ĠLiter ary
Ġa wa
Ġcl ause
ĠTrav is
Ġp our
ĠJo ey
ph ones
ĠGreek s
ĠVis ual
ĠNe ed
ĠR ag
Ġal ert
ĠNaz is
ĠM t
Ġamb ul
Ġc aves
ĠEnter prise
Ġl amp
Ġpar ody
ans on
Ġf rowned
Ġimag ination
are z
th on
ĠZ hu
ĠEd en
ĠVir t
Ġcur tain
ĠPri est
Ġin mates
act ical
ank ar
Ġpath way
Ġut ter
ĠIb n
Ġbr ush
abul ary
Ch ief
ĠR S
Ġt ips
Ã¢ te
O ff
ump ing
ĠOri ental
Ġfinanc ially
ig el
ch annel
Ġ ?
ct ica
s eries
ĠH ew
Ġg aming
ĠMon ter
ĠPrem i
ĠUS C
ĠPo etry
Ġrec ycl
ĠN ame
et ed
ĠT aking
Ġflex ible
ĠBar oque
Ġgamb ling
ĠT i
Ġsurround ings
Ġsuccess es
Ġmagn et
l ate
ĠDoc ument
ah r
B ad
th y
Ġec clesiastical
le w
Ġch at
occup ied
ĠTh irty
ĠAlexand ra
udd in
Ġsufficient ly
Ġinc ent
A D
ĠBeh ind
g io
Ġcompet es
agre b
Ġatt ain
Ġlabel ed
c ross
Ġirrig ation
ĠEuro pa
le ague
uit ar
Ġarch ive
Ġdec lining
l ings
ĠH utch
ra il
cut ta
ĠReg ular
Ġaff ects
ĠBo at
Ġload ing
Ġgr avel
ad ays
Ġcomp uls
in ia
ĠE du
Ġass ured
Ġsear ched
ĠEld er
ĠD res
Ġconcentr ations
Ġmind s
Ġcont empl
Ġspokes man
Ġpil grim
is ans
Ġsol ic
Ġrehabilit ation
A ct
ĠStri ke
pe z
uc ci
f ried
Conn or
ĠInd igenous
Ġst ew
ĠW ings
Ġcrim inals
pl aced
og ical
Ġpast oral
Ġrecept ors
Ġexp end
Ġpro long
ir able
Ġdown stream
ĠNic olas
ĠMar ina
te x
Ġreg ain
Ġdeliver ing
Ġsp ells
ĠLead ership
Ġover night
ĠR ost
Ġliber ation
ĠJ up
Ġworld s
ĠP om
Ġru ined
so on
Ġcl usters
Ġassoci ates
Ġang el
ĠBron cos
Ġwh olly
Ġ18 28
ĠM are
yn om
unt a
com be
ĠF ighting
Ġsp ray
Ġreper toire
Ġw aved
ĠBrun o
Tr ans
Ġam ended
Ġexc iting
Ġin ning
Ġfor um
ĠWeb ster
Ġspons ors
ĠK ell
Ġpack ed
ĠWinc hester
Ġcost umes
agn etic
ĠCh urches
haus en
Ġdis ability
gr ave
ac iÃ³n
Ġoccup ies
ĠPow ers
Ġproport ional
Ġoverl ooking
Ġheav ier
ic ol
Ġdon ation
U s
Ġhalf way
ĠMalay alam
ĠHon ours
A z
Ġdecl aring
ĠTour ism
ĠUnderg round
abb ing
ĠL av
ĠCongress ional
ak o
Ġexp ired
t em
Ġn as
Ġad ul
U l
Ġf ond
eng ine
is se
Ġdis qual
Ġdemonstr ating
Ġpage ant
Ġfig ured
oc ide
Ġthrow s
Ġt il
Ġal ike
ĠP ond
ĠEl i
Ġdrag ged
Ġgl obe
Ġsyn chron
Ġ18 24
ou g
ink ed
Ġsw ift
ĠBr ady
Ġacqu iring
Ġprec isely
ind e
Ġassess ed
it as
Ġass et
Ġel ong
Ġexha usted
Ġarm oured
op en
Ġrelax ed
ĠFle m
Ġtreat ments
Ġbr ide
r ÃŃ
N G
N D
ĠM ant
Ġunder water
ĠD ust
os o
ĠMan ch
u ber
Ġpract icing
Christ ian
m ay
Ġparticip ant
Ġexch anged
ĠRes erv
iling ual
ĠTo o
st en
Ġexcit ement
Ġbr anded
Ġs aves
Ġwas h
ĠH ollow
ĠStand ing
ĠT ud
ĠMun ster
ĠMikh ail
Ġhelicop ters
Å ¼
ĠMcC arthy
Ġres ide
Ġcollabor ative
ĠAl leg
Ġvac ation
ĠS V
Ġcry ing
Ġcr ust
Ġat oms
ard y
act ory
Ġm aker
ĠConn or
ĠHyder abad
g ement
ĠAnd roid
Ġst all
bro ther
e ous
ic ism
S un
Ġcon form
Ġrep aired
Ġprepar ations
Ġ10 7
ĠAg ent
ang s
ĠFor bes
ĠGarc ÃŃa
Ġmarri ages
Ġfinal ist
Ġquarter finals
Ġmemor able
in put
ĠFl ash
otherap y
ĠK ok
app ropri
ĠCh rys
ĠBas ic
Ġin adequ
on c
ĠEm bass
ĠLe igh
Ġtrans action
ĠĠ ĠĠ
Ġs a
ll i
sh ow
h of
gr ass
Ġsuff ix
Ġtext ile
ĠG ymn
ĠDisc overy
olph ins
Ġpl ains
des ignated
Ġqu ot
Ã¢ l
Ġâ ĪĴ
Ġconvent ions
ĠAv iv
W ork
ĠCan berra
ĠSut ton
Ġr iots
Ġdiffer ently
ec o
L ook
ĠBut ter
Ġr am
Ġafter ward
ect ors
g iving
=" /
Ġun re
ĠK amp
ĠB in
Ġt ab
Ġshort s
ĠApp eal
Ã§ a
w hen
ĠE rie
Ġdescript ions
Ġw isdom
Ã³ d
Ġh ug
ons hire
Ġtw ins
ĠTol edo
Ġmod ule
ĠIS O
ĠKr ak
Ġsuspic ious
Ġ17 90
ĠRe x
Ġse am
for ward
Ñ ķ
198 1
Ġcar b
ĠD ors
prof ile
ĠMo hammed
F I
Ġv it
lar ation
ĠK ara
ĠKolk ata
Ġp neum
ment ioned
Ġcontain er
Ġaccus ations
ĠZ agreb
ĠOl iv
af ia
g ent
Ġconf luence
ĠW ant
ek a
aceut ical
ĠS ales
Ġdi ary
ri ft
Ġreluct ant
st ep
Ġphenomen a
ij uana
d ia
Ġmag istr
Ġas pir
ĠR C
Ġdef unct
Ġchemical s
Ġf og
ud ge
Ġline age
Th ree
Ġenjoy ing
ĠS oci
Ġtrad ers
198 2
Ġdu et
Ġb ure
Ġph ones
d ish
Ġsp ine
Ġsher iff
ĠRed s
ĠAlb ion
Ġal beit
und y
ĠC osm
ĠSw im
ĠM ats
Ġage nda
Ġ18 29
Ġint imate
Ġpromot es
Ġpseud onym
T or
ĠL ance
Ġtrend s
Ġcolumn ist
op edia
o il
d or
aw ks
Ġspecial izing
Ġsub mission
ier re
Ġch ip
ĠS ach
Ġdi agram
um per
ĠCons ult
Ġbur den
Ġpreval ent
ĠCly de
Ġadj usted
ĠCec il
in ster
ĠR B
Ġunder way
Ġd airy
ĠGlac ier
res cent
ĠSand ers
Ġfus elage
o ft
ĠT ropical
Ġprot ested
ĠJ ub
Ġ10 8
Âł b
ĠJes uit
Ġjud ged
ĠPro cess
Ġcompan ions
st orey
play ed
Ġal pha
Ġref using
Ġcou ch
Ġconfron ted
ĠS ister
ĠM ell
Ġbar on
ĠB S
ĠAnd r
ĠH ear
Ġg raz
W F
or ical
ĠSh u
Ġdyn amics
Ġexpress ions
Ġmort ality
A ir
c ane
197 9
ropol is
omet er
Ġglass es
Ġfort ified
Ġles bian
ĠCh ambers
int ro
Ġpun ish
197 5
ĠCompan ies
Ġar ise
ry n
Ġshar ply
Ġcomm issions
Ġcomm od
er oy
ĠNe ither
ĠB ec
ĠR ally
ĠColleg iate
ib ald
d ong
ĠOffic ers
Ġhaz ard
ĠLe af
R P
Ġfact ions
lyn n
ĠE z
Ġbre ach
ĠHerman n
ĠConstant ine
ood y
umb ling
ĠJoy ce
ĠI ber
Ġstate wide
ĠSing er
Ġstat ute
om ers
ag ara
Ġh aun
Ġremark s
ĠVik ings
Ġland l
Ġemer ge
orth y
ĠI L
ĠJ ung
ĠB ram
ell es
Ġball ad
ĠLaure n
Ġsle nder
ĠY ah
isp here
Ġmasc ot
ĠR aven
ĠS EC
Ġprop he
Ġpr ayers
M od
Ġexcell ence
ĠSac red
ĠSc outs
act ivated
ill as
Ġcontin uation
ĠBar ack
ĠMatthew s
ĠIs h
ĠM olly
Ġsurg ical
R E
Ġadvoc ates
ĠSix th
Ġinter fer
Ġdefend ers
an ic
ĠL uz
ĠGust av
Âł h
ian i
Ġsubmer ged
ĠNeg ro
Ġpul se
yn es
ĠRel igious
not e
ĠAdvent ures
oun ge
ĠAnd hra
r ington
Ġsoph omore
ĠY uk
m ut
ĠCh amp
ĠField s
Ġderiv ative
D T
ĠW er
os aurus
Ġl ords
ĠC ivic
Ġhall way
Ġinvent or
Ġthe ological
Ġb urg
ĠA ce
M O
Ġlif elong
N Y
Ġm apping
ĠRober to
ĠBh ut
squ are
Ġpossess ions
Ġden y
ould er
Ġdestroy ers
Ġstrengthen ed
Ġch ambers
Ġim aging
ec onomic
ĠFl oyd
Ġnegot iate
ĠLad ies
ĠD ry
Ġpost al
rit e
Âłm i
ur able
ĠCN N
Ġlight ly
Ġhol idays
ĠL ill
pr int
osp ace
Ġsynt hetic
ĠAss y
Ġsum mers
Ġins ign
ĠDavid son
Chic ago
year s
Ġblock ing
Ġtr agedy
Ġp ile
ĠF K
Ġplate au
Ġlisten ers
ĠD A
Ġevolution ary
ĠM IT
Ġnob ody
ĠHast ings
Ġsummon ed
ook ie
à¤ ¾
ĠBe ast
Ġsc ent
ĠConstit u
ĠShe ikh
ĠGlou cester
L uc
as aki
Ġpost erior
b il
R ob
iz za
us ement
Ġrev ision
Ġdocument ation
ĠR BI
Ġun in
9 00
ĠN em
ĠPh ase
ĠJuda ism
Ġhier archy
Ġinfl ation
ba hn
Ġloc ate
ĠB onn
Ġec ological
ĠStrateg ic
Ġinstall ations
ĠK et
ĠBro oke
ĠM ey
ĠPer cy
ĠSlav ic
af a
ĠFrances co
ĠEmbass y
Ġm m
Ġarm our
ĠFal con
back ground
ĠC BC
ĠM iz
ĠM au
ivid ually
Ġaddress ing
Ġtrust ed
ĠDemocr acy
Ġpick s
ĠMot ion
H am
ĠF resh
Ġdest inations
Ġp aternal
ĠM ilit
us p
Ġtr ilogy
Ġsoc io
Ġcha os
wer p
Ġgovernment al
Ġn ic
Ġap ost
ib an
Ġpain ters
Ġsuspect s
Ġadjoin ing
ĠChe roke
Ġski ing
Ġenter prises
ĠSt y
Ġ18 13
Ġer osion
Ġrejoin ed
Ġh ollow
ĠRoad s
Ġá ¼
ĠLind say
ĠT error
pro v
Ġslow er
th or
Ġtall est
ĠNic arag
ĠNiel sen
ĠCal cutta
Ã¼ ck
ber n
ĠV iscount
ĠSl am
ĠW ong
p ound
Ġsumm ary
is bury
Ġorph an
ĠC ash
ĠSh ak
ĠF ry
ĠBat tery
Ġbl ur
ĠHan over
ĠAd ri
ĠElect ronic
Ġassum ption
Ġdecommission ed
Ġprofess ors
ock ets
Ġcollect ively
ant om
ĠAl ps
Ġcounterpart s
ĠPer iod
ĠMe eting
ĠGeoff rey
Ġret ains
ĠSin clair
u en
ĠB enson
ĠTh orn
ĠJ orge
Ġrob ust
Ġritual s
Ġlog ical
Ġdiss ert
ĠPark way
Ġschool ing
let ter
ĠAg nes
ĠBi ology
Ġge ography
ĠAub urn
Ġtrans actions
st orm
Ġpol ynom
ĠS uccess
cyl inder
ĠH our
Ġdepth s
ĠLand mark
ull a
Ġinf ilt
aut s
ias m
ĠL ect
Ġdeb ts
ĠArab s
Ġpsych iat
Ġapprox im
Ġtrou bles
Ġins erted
Ġfemin ine
z one
Ġsuspic ion
ang an
h un
Ġt ense
ri ka
Ġpro se
ah i
An y
ĠR um
ĠK ul
ĠG le
Ġslow ed
Ġsynd icated
Ġf raction
ĠF rem
us ive
ĠR ash
ĠMar ri
Ġcrowd s
Ġharm ony
Ġbel ly
ĠHart ford
ĠKh al
à ¯
Ġlight ning
Ġan terior
Ġphys i
el ius
Ġsens es
Ġsav ings
e el
Ġn atives
iz ards
Ġoccup ying
ĠGuj arat
ĠChrist ine
Ġex empl
q i
Ġsand y
Ġassum ing
1 30
Ġdipl oma
ĠC unning
ĠC av
Ġinst inct
197 8
al and
Ġg ospel
M G
Ġfre el
Ġinter val
clip se
Ġcatalog ue
Ġtreat ing
Ġret ro
Ġsl aughter
ĠW yn
ĠCred it
oc us
ĠCal ed
Ġhands ome
ĠSav age
A pp
ell ular
ĠZ ar
Ġannounc ing
p ark
Ġ18 26
ĠConserv atives
ps y
Ġvir al
ĠUz bek
Ġconclud es
ĠPol yt
ĠClay ton
ĠPat rol
h on
ĠMid lands
ĠIn ner
Ġtri angular
Ġcor rupt
Ġp ec
Ġpost ing
Ġlun ar
Ġr av
T w
Ġoper as
ĠOm aha
ĠL Ã©
ĠDaw son
p ired
olog ic
ĠD up
c io
T F
Ġf ores
Ġcr ushed
echn ic
Ġcoordin ate
Ġ18 18
Ġrel ates
b idae
ĠFerr ari
ĠTeh ran
es pecially
ĠD as
Ġstorm s
ĠAut onom
sc ill
ĠG DP
ĠDud ley
ĠG aul
keep ing
Ġaver aging
ĠV ald
ĠShir ley
e on
Ġimp ress
medi ately
ĠLet ters
Ġspecial ty
Ar ab
ã Ģ
ĠF uj
Ġb other
ĠS ene
Ġlack s
anc el
Ġdis g
Ġpl aster
Ġtum or
Ġl umber
Ã ²
ĠP ablo
ĠBas el
Ġsp anning
Ġprec ious
Ġm ice
Ġ >
Ġnon profit
C am
ĠTr acks
che ck
ĠSup erman
O per
Ġori ented
Ġactiv ation
fl ies
ĠA way
ĠM ons
Ġne o
Ġfin anced
ary a
Ġmoth s
Ġscen ario
ĠI st
At lant
com b
Ġmat ric
L and
O l
Ġc ure
Ġtrigg ered
ĠRec reation
he res
ĠSh annon
um ing
ĠNew ark
Ġrem od
Ġelect orate
pro t
ĠSh awn
ĠÅ ½
Ġar che
Ġcell ular
Ġdel ays
Ġcooper ative
Ġcy cles
Ġdomin ance
Ġy elled
ÃŁ e
ĠF on
ĠSh arp
eb e
Ġcinem at
Ġbarr acks
ĠDund ee
ĠTh ur
A I
ĠP oz
ĠAng ola
Ġnow here
in itely
Ġb ays
ĠSh ire
Ġdecl are
ĠS iege
Ġad mits
Ġr ides
Ġint ensive
Ġunn amed
ĠEy es
ĠMiddles ex
ĠC ram
ĠCle m
ĠJacob s
Ġbi as
Ġind uced
Ġpe ers
ĠPr ide
Ġsket ches
Ġdispl acement
Ġint rig
Ġdiox ide
Ġple aded
Ġ10 9
re cht
ect ing
ĠCl imate
Ġintro duces
Ġdet ained
Ġswe ep
Ġrest ruct
Ġst raw
ĠD unn
ĠSoph ia
ĠL ima
Ġwe ird
Ġord in
s ince
Ġtechn ically
ĠD ana
ĠH arri
Ġt atto
Ġex ports
Ġpol ls
ĠSw ift
ĠC ott
ĠCov entry
Ġd irty
op t
ĠVal encia
Ġresid ences
Ġm akers
Ġir re
ĠBry ant
Ġarc ade
h ai
ĠM anning
Ġsupern atural
Ġsp ans
Ġup stream
ĠTom atoes
ĠK nown
ĠTim othy
F ort
Ġembr ace
Ġmet ric
ĠAl c
Ġcelebr ating
Ġmark er
Ġc her
Ġatt itudes
Ġsuper hero
M ont
ĠF ow
r il
ĠThe ological
] (
at ile
vers ely
Ġsc rapped
ĠN est
Ġtest ified
ĠC ret
op rano
cast s
Ġtransfer ring
ĠAn imal
Ġblack s
Ġess ence
up p
duct ions
V N
ĠVij ay
c ence
Ġgen ome
ĠSport ing
ĠF ram
Ġmin erals
Ġair ports
il ers
af i
Ġk in
T ake
ĠH aj
Ġhun ter
ĠM its
Ġpromin ently
F O
Ġmax im
k el
Ġc ros
Do ctor
197 4
w hat
min ton
Ġpool s
Ġpl um
ĠChrist ie
ens ions
Ġalgorith ms
S I
ĠAntar ctica
Ġtrans cription
Ġconven ient
ĠBulld ogs
as o
Ġp iv
Ġn itrogen
Ġmet aph
ĠPr att
i ov
ĠSt op
ĠG os
ĠS leep
ĠL ope
Ġdem ise
hor se
c ole
ell ites
Ġment ally
m art
Ġrein st
ĠEl ena
ĠBrig adier
ĠW r
Ã¡ l
im eters
Ġ11 5
ĠRec ent
Ġang les
Ġmolec ule
l ayer
ĠL ands
Ġdefe ats
L ondon
pl ate
Ġcan vas
Ġadvertis ements
Ġic onic
or se
ĠT ate
Ġexpress ing
Ġshif ting
197 7
Ġfort ifications
Ã¢ m
ĠM I
Ġemerg ence
Ġexceed ed
Ġhal ted
U r
Ġproduct ive
Ġpod ium
ĠPsych ology
Ġmark ings
ĠZ ur
re ach
ac ia
Ġimag ined
Ġstri ps
Ġspe eches
ĠBo oth
Ġhom eland
ut ers
Ġpain ful
Ġgener als
Ġsl ogan
og ram
ĠInvest ment
Ġemb ry
Ġanten na
Ġmaneu ver
ig on
Ġmar athon
ov ic
Ġg onna
ĠTw in
Ġ18 16
ĠP ied
ĠWh ilst
Ġrep et
ee le
ĠÃ ĵ
ul ator
oc aly
Ġg ym
Ġpartnership s
echn ology
ĠHold ings
D er
Ġdepos it
. ",
L L
ĠV and
Ġours elves
ay at
com mon
Ġbas al
ĠD ag
Ġroll er
o ften
ick er
ic iary
Ġid ol
Ġpremi ership
ĠG aza
Ġmer ge
ĠSat urn
ust ain
ĠUnivers ities
Ġst are
Ġ" '
ĠCarm en
Ġcame o
Ġsec rets
V ict
ĠB olog
ĠCl an
Ġcur ious
se in
ĠRick y
Ä Ľ
B en
ĠD uk
t el
al one
Ġcorrespond s
Ġp oured
197 6
ĠT ina
ĠSc hed
ilib rium
s ar
ĠGr ass
Ġdev ot
se ven
ot on
ĠMin isters
Ġposs ibilities
Ġinfer ior
Ġfre eway
Ġlight weight
ĠS K
S a
ĠF ear
ĠCal der
ĠH ers
v ian
ĠR ules
ĠAnt werp
Ġpen etr
iser ies
ch ard
ail able
Ġe ject
ert iary
ĠMaur it
Ġcompos ite
m our
ax on
Ġnot orious
Ġar row
Ġins ult
Ġm old
Ġimpact s
ĠP ius
roll ing
ĠN in
Ġdisappoint ment
ĠWill is
ĠTunis ia
Ġreinforc ements
im et
Ġcontinu ity
Ġautom ated
Ġcompl iance
ĠIntern al
Ġlegend s
Ġpers ecution
T T
Ġpl ug
Ġd in
ĠMc Le
Ġatmosp heric
Ġcol oured
cl ock
Ġphys icians
ĠVeter ans
inn y
ĠMon astery
r ak
Ġs au
ĠT ara
Ġmotor way
ĠIceland ic
Ġident ifies
Ġrest ed
Ġb ast
ĠPet erson
Ġn iece
Ġswim mer
ĠPat terson
Ġexperi encing
Ġp ard
7 50
ĠL Ã³
sh i
Ġex iled
ĠN GO
ĠJ et
197 2
Ġcouncill ors
N ight
ĠI de
ĠPer forming
Ġ å
ĠG ov
ĠKu wait
C arl
ĠBagh dad
Ġw iped
197 3
Ġout let
Ġund is
ron gh
ĠIr ving
e ven
t ailed
Ġcomp aring
ĠS pl
Ġep onymous
Ġgif ted
Ġacc idents
Ġbroad ly
Ġ180 6
Ġanaly st
Ġview er
is ible
M R
Ġ180 1
Ġtheat res
ĠLam bert
Ġsp ont
ĠW are
Ġf ountain
Ġcoll ar
Ġaqu atic
ĠBM W
Ġmathematic ian
" ("
1 20
Ġsteal ing
Ġsle pt
and an
Ġsimilar ity
ar ine
iec es
w ave
ĠIb rahim
Ġbattle field
Th anks
Ġcount ing
Ġdisc our
ple x
Ġsh adows
Ġrebu ild
Ġundef eated
ĠB ott
ĠNord ic
ĠTon ight
ĠP ret
Ġ4 50
Ġsens ation
atin um
ic ious
Ġsol ved
Ġloc ks
em on
Ġpost er
M ary
ĠC ounsel
Ġign ore
Ġcatch ing
ĠT D
Ġoff spring
P L
Ġsurvey ed
Ġmeant ime
Ġl aughter
ĠBas que
ĠDeut sche
col or
Ġwrest lers
Ġca ution
Ġp amph
Ġas ylum
uff s
Å º
id y
ĠC ove
Ġaccount ed
ĠAr lington
ĠSch ne
C E
ĠFranc isc
Ġsod ium
Ġconcept ual
Ġfair y
Lou is
n orth
ĠHam mond
Ġrecogn izes
Ġreun ion
dr iven
ĠVenezuel an
ĠW arn
ĠNe o
Ġcomp ly
Ġ18 27
ĠF ast
ĠPear son
os er
p ack
Ġexpl ores
lic ted
Ġlif ting
Ġru in
Ġhe x
Ġfl ames
ĠDec laration
Ġdism ant
i aries
ĠP ole
for th
Ġinstit uted
Ġpos ed
ret ion
Ġp ac
ĠEl s
it Ã©
ĠM ec
Ġarm ored
Ġe agle
Ġf aded
ĠD oyle
ong o
ĠPhilip pe
ul ia
ĠParad ise
ĠT ac
ĠReturn ing
ow ing
Ġh ips
Ġquestion ing
ĠP end
Ġcar pet
ĠB ug
ĠCar penter
Japan ese
ri que
Ġevac uation
hy dr
g one
aw k
ĠZ oo
ĠDen is
ĠHeart s
rep resent
ĠA ston
Ġassist ing
ĠArab ian
ĠDuc hess
ĠWander ers
ĠLet ter
o ise
ĠDe al
Ġant is
Ġdisch arged
ĠT uc
Ġind ef
ĠMong olia
Ġthe ft
Ġf u
l ace
Ġreconstruct ed
ĠBerm uda
mans hip
im edia
ink s
Ġcons erv
Ġ179 3
Ġreact or
ĠCheroke e
aut ical
ĠElect oral
Ġbas ically
ĠCarl isle
ach ute
Ġper mits
Ġreorgan ized
Ġcalc ium
Ġas ym
Ġpat ents
Ġd amp
Ġl as
ĠAle ks
Ġinf inite
Ġin ability
ĠAt l
ĠNe igh
ĠAbd ullah
Ġpos itively
ĠRec ently
ĠGreat est
Ġfix ture
abet es
J ean
ĠH ak
ic ultural
Ġsp ider
ĠValent ine
ĠÄ °
Ġjuven ile
Ġrecover ing
ept ion
r ically
Ġcontract or
ĠTor res
Ġsu its
E lect
ĠZ ero
R ec
is en
Ġobser vers
M ah
iol a
Ġsubdiv ided
Ġtarget ing
ĠCan on
ĠB le
ĠK ub
Ġbe ast
Ġrep orters
sh irt
Ġhold ers
ĠS ale
Ġst ays
ĠY ak
ĠN ad
writ ers
Ġst ab
Ġbal anced
Ġdec ay
ecess ary
ht ml
Ġsuper intendent
up on
ĠC ertain
\ .
Ġexcav ations
ĠA AA
Ġconfront ation
Ġdeb ates
oper ative
p rom
ĠH oney
Ġspec ification
Ġteen agers
F re
rict ion
ch y
Ġrefuge e
ĠW an
ĠReserv oir
sc ape
Ġmodel ed
ĠH ok
abs burg
ĠSal isbury
ual a
Ġcult iv
Ġintim id
Ġal igned
K h
ĠHe ather
ĠTit ans
ĠBr aves
ĠM k
ĠP ill
Ġind ividually
ot i
Ġminor ities
ĠR w
Ġfe eds
Ġsub division
Ġuncomfort able
y u
atch ing
Ġt issues
Ġpeas ants
ek ing
but ton
ĠMÄģ ori
Ġfuck ing
ĠS udden
Ġd ull
Ġqu arry
H D
ĠPat ricia
ius eppe
ĠApp lied
ĠC ran
Ġe cc
Pl ay
Ġac et
ĠComm odore
ĠMaced onian
ĠH ale
Ġunder going
ĠCh u
ath lon
Ġcont amin
Ġle an
pl an
ĠR ising
Ġsoul s
Ġalumin um
Ġr im
ĠK C
Ġstair case
ĠAl ess
Ġre ctor
ey ed
Ġdefend ant
Ġdet ached
ou st
back er
Ġr age
Ġimpl ied
Ġlicens ing
g on
ĠBart on
Ġag ing
ĠAir ways
Ã¡ lez
ĠF ashion
Ġphot ographic
Ġcycl ist
Ġvow el
Ġrent al
Ġ180 3
ut ory
ĠD at
c am
ĠS aid
ĠL uk
ag ree
Ġt ide
ĠParagu ay
Ġprem ium
l ift
Ġb arriers
an u
Ġref usal
Ä ĵ
Ġpriv at
Ġla und
Ġdead ly
Ġexcav ated
B B
Ġsp inning
ĠB it
Ġank le
Ġhold ings
ĠBr ain
ev al
ĠC ategory
Ġvict orious
Ġfl ame
M F
Ġh urd
ĠCunning ham
Ġell ip
ĠS unn
Ġday time
Ġmountain ous
Ġbe friend
Ġgroup ed
ĠTur in
ĠCorn er
Ġworth y
ĠJer ome
Ġ18 19
Ġdisp atched
E s
ĠR oma
Ġf ox
ĠEm irates
Ġpref ix
Ġ ×
Ġmod ification
ĠLe Ã³n
Ġje ans
Ġup right
G e
Ġback s
Ġ17 0
ĠSax on
ĠBundes liga
Ġstand ings
ols hev
Ġfrustr ation
op a
Ġins cribed
Ġentreprene urs
ĠIsab ella
eck er
an za
ĠParalymp ics
ĠT ort
ins ki
m ith
Ġaccur ately
Ġviol ated
Ġinject ion
ĠF CC
Ġthe olog
Ġol ive
ĠÎ ±
ĠS ew
Ġst ole
Ġsexual ity
ĠO v
Ġfeather s
ĠHumph rey
ĠPar ade
Ġh iking
ari os
w ear
Ġprec ision
Ġanthe m
ĠBull s
ĠChes hire
ĠSe venth
Ġfram ed
Ġorigin ating
omin ated
ĠDet ective
ĠColleg es
Ġpl aint
Ġle v
Ġexpl oded
Ġenthus iasm
ĠBar rett
ĠMu gh
ap le
Ġbal con
per t
ĠB oss
ĠAdvent ure
arn a
ab ar
Ġ11 1
Ġd rought
ĠP ool
am ination
h m
Ġabund ance
ĠD ix
ĠN ay
F ar
ac io
Ġgal axy
ill i
Ġcoordin ated
view ed
Ġsk ate
str ument
Ġscript s
r ud
w ana
Ġsevent y
ĠSoviet s
ĠShe ll
ĠGar rett
Ġunanim ously
Ġlocal ities
ĠT ut
ĠCarl ton
Ġout law
ĠH S
Ġper ennial
art z
ĠDres den
ĠTh ank
Ã¨ ne
ĠRou ge
ĠE arn
ĠCub s
Ġgl ory
Ġw ears
ĠReform ed
f ax
h om
Ġm ol
Ġd ive
ĠRub y
ĠH BO
Ġinter vals
in ating
Ġpull s
s ize
Ġsim ulation
Ġdepos ited
ĠW en
à ´
Ġred ist
ĠI ps
ĠJup iter
ĠTe achers
s un
ugg ing
red itation
ight y
Ġshif ts
Ġabrupt ly
ir us
Ġs erm
Ġref r
ĠBang kok
Ã¨ res
ĠVen us
Ġst atic
k ill
Ġforest ed
Ġcirc uits
ĠHow e
ĠK ob
ĠBah rain
ĠR it
Ġprocess ed
ĠBlack burn
ĠLÃ³ pez
D el
or ers
ĠR ust
Ġher ald
In ter
Ġsk ept
ger ald
ĠC able
ĠAd ults
unk er
ĠIn clud
ph oon
Ġse iz
Ġupd ates
ĠCh oir
Ġout right
ĠMap le
ili ated
Âł "
Ġpra ising
ĠOcc up
ĠS L
Ġinf ring
ĠPars ons
ay ette
ĠGonz Ã¡lez
Ġcl ip
Ġorder ing
Ġuncertain ty
Ġhyd raul
Ġar ches
th irds
ĠM W
ĠCed ar
f u
oy e
ĠCl iff
ĠO kin
Ġcompr ise
ĠC ities
ĠD uck
Ġspat ial
In ternational
Ġsatisf y
Ġp ear
ĠAr cher
ĠS earch
Ġcap ped
st eps
H ome
d ou
Ġpres ided
ĠR ough
____ ____
Ġwhis per
C all
ĠHy dro
Ġunus ually
Ġesc orted
ĠAct s
Ġind ication
Ġover haul
Ġplant ations
oll a
ĠProper ty
ĠFI BA
Ġeconom ist
ĠS yl
ĠThe res
ĠAugust ine
Ġcur se
heim er
Ġreminisc ent
ific ent
Ġde af
Ġun related
ĠG ould
Ġ18 22
Ġwe ighed
Ġcontroll er
Ġdef enses
Ġhung ry
Ġeight eenth
Ġdissert ation
ist ries
Ġsens or
ĠRand olph
Ä± n
Pe ople
Ġ12 8
ĠMic key
ĠP red
ĠIm mediately
ĠBron x
Ġrebu ilding
hes is
utt gart
Ġz oo
197 1
Ġcart oons
Ġf ist
ĠCann es
Ġdef icit
ĠTradition al
ĠT il
Ġ/ >
avel ength
Ġconstr aints
Ġch ord
Ġble w
Ġpip eline
ĠInvest ig
auth ored
ĠJ ing
j ee
Ġbad ge
ĠRud olf
Ġtownship s
ĠM ih
p os
ĠShe pherd
ĠF ol
Ġinn oc
und ers
osp here
Ġpass ages
Ġapprec iate
Ġsuperm ark
Ġback wards
ĠOrgan isation
ĠGal way
Ġb ells
Ġappe als
ĠN ou
ak is
ĠNon etheless
Ġdisp osal
H ave
Ġo scill
ĠRivers ide
l at
ond ition
ĠW ould
Ġnurs es
Ġhung er
M B
ĠMid west
Ġt in
ĠSe v
ĠBuch arest
Ġ5 000
Ġw it
ĠAnt io
Ġnational ism
Ġprecurs or
Ġrecru iting
ĠUlt imately
C H
p rop
ĠBang alore
f il
ĠD ru
Ġme als
Ġmid st
ia e
Ġrel ate
ast ing
Ġbes ie
al om
Ġf als
Ġt empt
Ġ11 2
Ġshoot er
v ine
ĠM O
Ġple asant
ĠFro st
Ġ2 20
ĠJ agu
Ġtrou bled
Ġgrand daughter
ĠG Ã³
Ġrot ating
Ġpossess es
al ach
ure n
ĠQu int
Ġorganiz ational
ĠStand ards
p oints
ĠMa o
ĠU d
ĠBark er
ĠBy ron
Ġfart her
om ans
ĠIs les
he id
Ġrum ors
Ġ18 23
p arents
Ġproject ion
G E
ĠGr im
L ong
Ġmerch and
V I
Ġ180 9
ĠP anch
ĠBar ber
ĠAugust a
ab is
nd on
Ġch ips
ĠLoren zo
ÃŃ o
Ġpedest rian
ĠBever ly
ĠI CC
Ġa pex
Ġr het
uv ian
Ġcaptain ed
por a
Ġfac ial
p us
Ġg orge
ĠF landers
ĠLope z
Ġsoc ially
N U
T y
Ġobser ver
Ġl ymph
Ġfolk lore
ib al
Ġprocess or
Ġpl ac
Ġp ending
Ġcomp ression
Ġfire arms
Ġaccum ulated
Ġpred ators
Ġsh ade
Ġhand ic
Ġscre amed
Ġsub stances
Ġmon sters
Ġr all
Ġtra uma
Ġn ec
ĠG n
ĠAnn iversary
Ġadm ired
V ol
ĠG at
Ġve ins
Ġapprec iated
ĠF ant
sup port
ĠL ooking
ĠAustral ians
Ġten ants
ĠY osh
che z
ĠAs ide
ĠB rem
Ġspir al
ĠKann ada
aret te
Ġrec ount
ĠPort o
b as
Ġa ven
S im
Ġspec ulated
Ġmet ro
Ġoffer ings
ĠM ets
ĠDon na
". "
Ġst rongh
ĠP BS
ĠDown s
Ġexplo itation
Ġtrans fers
Ġair s
ĠL und
es y
af ts
Ġpup pet
Ġpl ots
Ġcouncill or
ĠSe lect
Ġto ys
ĠAbb as
Ġflood s
clus ions
ĠPra irie
Ġnumber ing
air craft
ĠH absburg
ir ming
B ack
er d
ĠAl berto
Ġheart s
Ġc ake
Ġapprec iation
ĠB rett
Ù ħ
Ġb ind
e aux
Ġsup reme
on o
Ġt iles
ĠR ita
ĠC I
h ig
ĠC ale
ĠD oming
Ġser ge
ĠD over
ĠM ist
ĠAll Music
Ġyour s
Ġd ental
Ġdam aging
ĠCris is
ĠRe bell
Ġnecess ity
Ġfrustr ated
ĠI R
f em
er ting
196 9
ĠP ue
ĠGener ally
Ġpun ct
u ating
ĠB ian
j ar
Ġge ological
ĠAdmir alty
ĠR och
Ġprog ression
Ġwid ened
You ng
Ġ18 17
Ġpersu ade
Ġp sy
196 8
B ul
Ġgr at
larg est
ĠF ight
ĠM und
Ġdisappear ance
ĠWe ber
record ed
ang led
ĠP ag
ĠW B
Ġgrand children
Ġcard inal
Ġover d
int age
Ġc ared
ot ive
Ġal ley
ĠArchitect s
Ġsh y
vent ions
ĠRel igion
Ġbirth place
Ġpass ive
ĠC asc
ant an
l ake
Ġcampaign ed
ĠAsh ton
Ġf ring
c ue
Ġtribut aries
b irds
ĠS Ã©
ĠG enesis
Ġeth ical
Sp anish
Ġst ressed
it ism
Ġinf lamm
ĠF res
C at
ip edia
ĠTechn ologies
Ġflag s
Ġprivile ges
ĠLiber t
p i
Ġimpl ications
Ġbu zz
ert ile
ĠIn ver
Ġdet achment
work ing
g il
Ġl odge
ok i
b ore
le af
d ated
app ers
Ġsurpass ed
ern e
Ġsupp ress
Ġin k
ĠSy nd
Ġmort ar
ĠEthiop ian
Ġex ported
ĠClare nce
ab h
Ġbure auc
Ġcapt ive
asc us
M M
N ever
ĠSt yle
Ġecc entric
Ġpostp oned
st atic
Ġdis abilities
ĠHol t
che t
ĠHon our
B ecause
h ttp
Ġh ast
Ġco ordination
ĠÃ ł
ĠRe ad
Ġbackground s
ĠP asha
Ġhur ried
Ġrac ism
Ġmist akes
ĠZh ou
ow itz
Pac ific
Ù Ĩ
Ġ180 8
Ġsh ame
ĠBrend an
F rance
ae a
arat us
ĠS erg
Ġon set
op hys
Ġdev ised
Ġfire f
Ġdis in
Ġs el
Ġinvent ory
Ġv iable
ĠFitz gerald
B er
Ġtw ist
ĠM og
Ġla wn
Ġr hy
M ax
Ġoblig ations
Ġc ob
S em
Ġthick ness
ra red
Ġpitch ing
Ġsupp ressed
c irc
ĠL ans
ĠImp ro
l oss
J P
Ġtrem end
Ġat e
Ġdevast ated
Ġelect rom
um ar
ĠIv y
ĠHigh lands
Ġinform s
ĠN ate
ĠSch midt
ĠCat alan
ĠCh ak
Ġoccur rence
Ġrend ering
Ġsens ors
Ġrecept ions
Ġreal izing
Ġint ake
Ch inese
ĠTre k
Ġb iblical
ĠGal axy
ograp hers
ĠB ally
ĠN ut
Ġcour thouse
) (
ut ic
ch in
Ġass im
ĠPolit ics
Ġsatisf action
M ir
ong a
ĠB ac
ĠRe leased
ĠNew sp
n ance
ĠD ram
ĠFl at
Ġn odes
ĠB ax
Ġc age
ĠU P
ĠGreen wich
ec ourse
J ac
ĠDaniel s
ĠV A
Ġ ÏĦ
Ġf oul
ĠS W
ĠAssoci ates
ep er
ĠC ull
ĠMag dal
Ġspect acular
Ġsp or
Ġstr anger
Ġwat ches
ĠÅ ļ
ĠDar ren
ĠPart n
ĠAltern ative
Ġg able
Ġsymp athetic
st a
R oyal
Ġrob bery
umb ers
ĠTyp ically
M ur
ĠH ague
Ġres ume
Ġ ump
icular ly
on el
ĠChar ity
Ġrec apt
H ot
cont inental
Ġins ert
ĠVe hic
ĠMoz art
Ġmob ility
anc ies
Ġlim iting
Ġsub way
ĠSteel ers
Ġreg ulate
Ġd Ã©
ipe i
ĠK oz
c ip
B ur
est an
ios ity
S omet
t ford
ĠTh ous
uck ed
ĠR anger
ĠInter est
Ġle isure
St r
Ġwild erness
Ġbene ficial
aster ies
ĠRaj as
Ġshut tle
Ġstret ching
ĠF i
Ã¶ m
Ġpen et
Ġswall owed
br and
ĠSch war
ember g
ĠCam den
Ġsus cept
Ġimplement ing
l ot
Ġhas n
Ġpress ures
Î º
L D
ĠH ip
Ġfit ting
ĠO mar
ĠMagn us
ad an
s ung
V ar
ĠD epend
Ġsc al
ĠMac Donald
Ġ1 19
Ġlad der
ĠF arn
Ġen force
Ġsuc c
ĠAlf onso
Ġevery body
ĠD iane
Ġ179 4
ĠHond uras
ĠL ug
ĠApp roximately
Ġmer it
Ġn ode
ĠP GA
ĠKat ie
Ġexam s
Ġsw ords
ced ented
ĠEv il
ĠUC I
Ġj ungle
ba um
ĠMin i
Ġve in
ĠSt uttgart
Ġext raction
ĠGl oria
Ġprofit able
Ġes p
ĠB oul
ĠNob le
ĠBar th
ĠSey mour
ĠSim mons
ve z
Ġdis par
Ġgest ure
ĠB Ã©
Ġmon etary
ĠSam oa
ĠM ord
Ġhe d
Ġ179 8
cul osis
ĠDr ag
ĠA unt
Ġbott les
ÅĦ ski
Âł 2
Ġsp arked
Ġpip es
ig ma
Ġpat rons
u ctor
Ġgl uc
ĠDomin ic
Ġex otic
Ġinvest or
ĠNic ole
Ġl yr
Ġreason ing
hn e
Ġp hyl
m ag
ĠRav ens
Ġfe as
Ġwork force
U nder
Ð ´
Ġopp ose
ĠHass an
ow ment
Ġgr ape
ĠInt el
ang i
Ġmed i
Ġwh oles
ĠR onnie
Ġacadem ics
ĠN ina
ĠUn cle
Ġinadequ ate
P o
Ġinf ections
ĠTw elve
en ko
Ġretrie ve
ire n
ĠE S
Ġ18 11
ĠH enn
ĠK ras
ol utions
Ġwa ived
Ġeconom ically
Ġcor al
Ġdep iction
ĠP oints
Ġcomplex es
ĠC ors
Ġbrut al
ĠCe lebr
m ere
ĠEvangel ical
n ick
osa urs
Ġprosper ity
ĠG ott
ĠCh arg
Ġshare holders
ĠÃ ħ
u ations
Ġweekend s
z ew
ĠK ick
Ġjewel ry
D en
C y
Ġst ack
Ġpractition ers
Ġgr im
ĠVik ing
ĠS idd
ĠP erm
Ġdem ons
S und
ĠNum erous
haw k
ĠGreen land
Sp ace
ĠAm ber
Ġe man
L o
Ġw ise
ĠWilliam son
ĠWal ton
ar as
Ġsat ellites
ĠP asc
Ġnob les
Ġsun light
ĠG S
Ġm ars
ĠN iss
ĠJ ain
ĠW ire
The se
ul ing
Ġpun ch
ĠTrust ees
ĠM GM
ĠSom alia
Ġstret ches
ĠSund erland
Ġbehav iors
Ġcompuls ory
Ġex agger
Ġ179 5
Ġn ost
br ight
Ġle aning
Ġchim ney
Ġext inction
Ġresemb lance
Ġlim bs
Ġrub bed
ĠV ul
Ġadvertis ement
ĠWest on
ĠW igan
ĠV ista
ĠStev enson
ĠBe aver
Ġextens ions
Ġlik ewise
Ġc el
Ġst aging
Ġcontin ually
ĠP ip
Ġelect rons
Ġdecor ations
her ty
ĠLiber als
isl av
ĠRol ling
ĠM iy
oc yt
ree ze
Ġpap al
ĠFle ming
Ġbeet les
F inal
ac ity
Ġdiscuss es
Ġdist ribute
Ġbuild er
m ounted
ac cess
Ġvic ar
Ġchuck led
it ud
un ks
ĠBy r
ush i
inn ess
ĠC ey
ason ry
196 7
ri z
Ġ180 5
ĠRe e
H T
Ġred dish
Ġ180 7
Ġorchest ral
ĠGu err
ay e
ĠH R
ĠWhe eler
Ġr ud
ĠY i
Ġstruct ured
Ġfung i
ĠM ate
ev il
ĠArch diocese
ĠLank an
ĠNorm al
ip le
Ġvot er
c ular
me aning
Ġnot ation
ry pt
ĠH os
ĠAt las
Ġble eding
Ġp ound
ĠDw ight
ĠBolog na
um ont
ĠSupport ing
Ġrepresent ations
T ell
Ġvac ated
æ Ŀ
r ust
Ġhum orous
Ġselect ive
ĠG ert
Ġten or
Ġt ire
Ġentire ty
ig m
og ues
Ġdist ress
Ġconfer red
ĠM uss
ĠN un
Ġamalg am
ev ille
Ġpass port
Ġrec k
ĠGaz ette
l oe
ĠTe en
Ġdisapp ointing
ĠV y
Ġmod ules
ĠAll ison
ĠK yr
r aged
Ġw agons
h olic
Ġex h
Ġhand ball
ung a
Ġis ot
ĠS my
Ar ch
u ably
ĠC ot
ess es
rap er
ĠY as
Ġbow ler
ĠWater loo
Ġpr one
Ġsl iding
Ġmasc uline
ĠH ours
Ġprovision al
ar aj
Ġcol span
Ġdi oces
ĠEven ing
n ear
ĠGr ac
Ġide als
Ġd read
Âł l
ĠK ak
ĠD odge
Ġrepro duction
Ġpoet ic
Ġchief s
ĠSc r
Ġsem ic
D ark
or ah
op us
ĠEl ite
z yn
ĠCl aus
Ġreject ion
Ġkeyboard s
ĠCol ts
ĠPenn y
C ategory
Ġprompt ing
l ooking
ĠP ike
ĠL inn
ĠSudden ly
in ist
st als
ĠM ud
Ġrib s
Ġtra vers
Ġprompt ly
ĠCor inth
Ġl overs
ĠAdministr ative
Ġpres umed
Ġh iring
f est
ĠHold en
am oto
ĠM err
Ġsubsc rib
ĠM oy
uther land
ĠIps wich
Ġmot ivation
ĠW ave
ĠAust ro
Ġattract ing
ĠRel ief
Hist ory
ĠMar i
L ike
Ġlung s
ĠS amp
Ġappoint ments
od on
Ġver bal
at as
st ick
ĠCh op
ĠBe ir
Ġcollect ors
L O
ĠO rient
ĠSund ays
ĠMar se
Ġancest ral
Ġhel m
g eneration
Ġcharg ing
aw an
Ġun released
Ġsn ap
ĠAbb ott
o ic
Ġdevelopment al
Ġres idency
Ġbre asts
ve x
Ġhost age
Ġgovern ors
Ġsubordin ate
H ouse
Ġb og
Ġcolon ists
Ġphys icist
ĠC ON
av our
ĠDiv ine
n as
Ġsh ores
Ġur anium
w on
ĠGr aves
it ian
ĠG avin
) -
Ġexped itions
Ġcoast line
ĠSter ling
ĠS ure
Ġunh appy
Ġback ward
Ġpatron age
R ev
Ġout lined
. -
ĠHans en
ĠPack ers
ĠLat vian
ĠNor se
Ġd ose
oph il
ĠMed ic
p end
Ġl ing
Ġcry stall
A v
ĠI rene
Ġiss uing
Ġmar ching
ĠIm port
Ġhind wings
ur ian
Ġnom inal
Ġemploy ing
ĠUn ity
Ġver dict
edd y
Ġp ose
St ep
Ġunc overed
ĠV on
Ġmed itation
H op
Ġg rief
ĠDerby shire
Ġsemif inal
Ġobsc ure
Ġdocument aries
Ġ16 00
ĠTer esa
Ġfl ora
Ġim ped
ĠRodrig uez
Ġmart yr
L aw
ĠM LS
ib i
Ġgener ous
Ġthorough ly
Ġr ays
ĠSh o
Ġl iability
ĠSk i
Ġorb ital
ĠX u
ĠL oss
Ġ17 80
Ġrecru its
Ġninet een
es i
Ġelimin ating
Ġun l
S orry
ĠM E
ĠSh ut
un it
Ġmut ations
azz o
ĠBritt any
Ġconvers ations
Ġdiscover ing
Ġmarry ing
ĠJul es
rank ing
Ġr ay
pr im
ĠAct ing
Ġrefer enced
Ġshort age
Ġrenov ations
u o
ĠInnov ation
est ine
Ġfundra ising
Ġgreet ed
E mp
ĠPer kins
ais y
r s
Ġbel oved
Ġdefin itions
ĠFlem ish
Ġbe ef
ov Ã¡
Ġfail ures
j un
sh an
Ġrepro ductive
Ġcas ino
om at
w aters
Ġunw illing
Ġkiss ing
Ġbr ace
Ġturb ine
Ġumb rella
Ġunch anged
ĠT arg
Ġinf ect
ĠDo ct
ĠSt ark
ĠDam ascus
ĠT itan
Ġl uc
ĠDors et
ĠFront ier
ĠTH E
ĠMy ers
ĠTa ipei
Ġpione ered
Ġshow case
ĠNational s
w itz
Ġhe red
Ġesc aping
Ã¤ n
ĠH appy
D ef
Ġw avelength
ĠSt arr
Ġsens itivity
Ġpredecess ors
U T
ĠMin ing
Ġbank er
Ġad verse
Ġscream ing
Ġerup ted
Ġbl own
ĠSuper intendent
Ġreward ed
Ġch ancellor
H ello
Ġm ural
Ġunp re
in ians
ÂłM Hz
Ġconstruct ing
Ġblank et
ĠProp het
ent er
grad ation
Ġwh ites
Ġ180 4
ĠC yn
sw ald
Ġl oving
N FL
s ville
Ġh airs
ĠKit chen
f rey
Ã¢te au
Ġdress ing
ĠMoz amb
à¥ į
ĠEst ablished
Ġp irates
ĠC ell
ook ed
Ġgener ator
ĠFor rest
ash t
Ġculmin ated
dist rict
ĠG iuseppe
Sm ith
tt a
ĠJul iet
M er
Ġgross ed
ĠTh ing
Ġcomb inations
Ġal iens
ĠHaw kins
ĠRena ult
Mar ie
Ġnetwork ing
R ay
n or
Ġfle eing
er ver
ĠEx c
Ġste als
Ġdiss ip
Ġturn out
Ġimm ers
ĠJose f
ĠR ath
ĠSh im
ĠPh i
O ver
et ically
us ch
ĠReg ina
s igned
Ġanch ored
Ġbo oth
ĠU se
Ġf ertile
ĠExpress way
ĠCount ess
light en
Ġl ag
Ġh ttps
ĠM B
n ica
ĠK ant
19 45
Ġcy t
ĠX in
Ġquad r
Ġcheck ing
Ġscr ut
m ese
Ġfunction ality
ĠRebell ion
Ġsubscript ion
ĠLah ore
A p
ĠPay ne
Ġpatrol s
b ilt
ĠG ob
en ian
m inded
ĠGovernor ate
Ġpop ul
ĠGer ard
ĠN avig
ob il
un ion
is y
orn s
ĠKim ber
b ral
n esty
ĠGu itar
ĠW itch
so lete
Ġhat red
Ġcompl iment
qu ality
Ġhy mn
ra ught
Ġvolunte ered
19 30
Ġaud itorium
ĠG iant
Ġd welling
Ġ180 2
D i
at y
od i
Ġbomb ardment
G al
ĠMart ine
Ġpl ague
ĠMaj esty
ĠUs ually
Ġtransp arent
ĠB res
ĠP oor
Ġatt achment
Ġpre historic
Ġsem inary
Ġc aut
Ġdispers ed
uff ed
Ġsyn agogue
ĠB R
W estern
Ġequ ilibrium
Ġwin ters
Ġgu ides
Ġdisturb ed
t ec
Ġgas oline
Ã¨ ge
Ġsoci ology
be h
ĠRiver a
Ġfa Ã§
D am
ro let
Ġneur ons
Ġno on
ĠL ec
Ġassign ments
ĠMel issa
ĠFR EE
Ġmetall ic
Ġd ella
anc ock
ĠMcC art
ĠGerman ic
ĠO ce
Ġtoss ed
ĠPer uvian
as so
ets k
Ġb ru
ograph s
Ġstep ping
D ead
ĠG ore
Ġpur se
id ia
ĠH ag
ĠCast ile
Ġintercept ed
Ġpromot er
Ġdev otion
ĠS v
em y
D O
Ġhom age
ĠT C
ĠId ol
H R
Ġam usement
flow er
Ġconsort ium
Ġsh oe
Ġnon etheless
ĠP emb
ĠGo a
Ġf eder
ĠBah Ã¡
ĠT ao
Ġdevast ating
Ġtrad es
ĠHar lem
amb oo
Ġ179 2
Âłb illion
Ġun stable
inc hed
ĠAll music
Ġs ap
ĠV ince
Ġsac rific
ge e
ivid ing
Ġgentle man
Ġapplic able
Ġcur ator
Ġ ul
ĠP iper
ĠC T
Ġwest ward
Ø ±
Ġcart ridge
m eter
ĠOs aka
ĠP ull
ĠHer r
L ast
Ġdismiss al
Ġsw ung
L I
are th
Ã ¬
ĠOpp osition
ĠS ob
ĠI A
ĠAn alysis
ĠSch u
Ġconclud ing
196 5
Ġd ip
ĠNo el
Ġunpre cedented
ow ell
ĠAl am
Ġmigr ants
ĠLenn on
Ġ ions
Ġsl ate
Ġauthent ic
Ġv ag
Ġmin iseries
roll er
ĠBet ter
Ġske leton
Ġenzym es
ach y
ĠT es
Ġy esterday
Ġfr aternity
ĠMorm on
ĠPartn ership
s son
ĠD ifferent
Sat urday
n ch
Ã©t ico
N othing
ay ana
Ġgeomet ric
ĠLaure nt
ĠPrim era
ank a
rel s
g ren
Ġj ockey
Ġw ines
are a
or io
Ġsong writing
Ġinterpret ations
Ġwell s
ĠH P
Ġmini ature
en b
ĠT ill
ĠT uls
Ġinter ception
C ast
ĠR ene
Ġdr ained
Ġar ched
Ġmedal ist
ening rad
ĠRap ids
Ġcirc a
ĠLion el
Ġsubstr ate
Ġpro stitution
ĠG uru
W ashington
l arge
Ġcont ests
Ġapp le
Ġch ol
Ġtort ured
Ġsent iment
ĠBav arian
Ġign or
thor pe
ĠPolyt echnic
ĠP iano
Ġquart et
ĠMay o
Ġal pine
ach a
ĠT urb
Ġprosecut or
Ġball ots
F red
Ġgrant ing
ustr ated
ĠO man
ĠK ilk
op ath
Ġadd iction
ar h
ĠF ischer
ĠJo han
Ġorgan ism
ĠBet a
Ġvis a
Ġang els
Ġtit ular
ĠE ra
ĠG us
ĠTaiwan ese
ĠUlt imate
F our
ĠEd ith
disc iplinary
Ġbr ack
gl ass
Ġwarm th
Ġg roc
Ġme g
Ġhe ars
Ġat he
ĠHu ang
ĠWill ow
ĠJak arta
Ġow ed
Ġorigin ates
Ġres isted
Ġsuff rage
d ate
ĠRest oration
Ġapp aratus
Ġcle ver
ĠAutonom ous
c ost
Ġs inc
ĠElis abeth
ĠF ritz
Ġd rown
ĠCom ic
ograph ically
ĠKar achi
Ġconvinc ing
Ġobserv ing
ĠDep ot
ĠT ap
igg s
ĠSup erv
az y
Ġredes ignated
Ġharass ment
ĠEx cept
ĠRes olution
Ġencour ages
ĠA id
ĠGen oa
ĠG el
Hung arian
Ġyield s
Ġcomm uter
B ay
ĠAr agon
v iol
ke f
Ã¡ d
Ġdev il
Ġmed ication
ĠD ise
Ġab normal
ĠI RA
il ated
Ġsp erm
at an
Ġg y
ĠSt ones
ĠCatholic ism
at hed
Ġp ad
ĠT orn
et he
ĠM itch
road s
ĠIs abel
ĠChrist church
gl omer
! ".
Ġnot ices
G irl
v ideo
Ġvac ancy
Ġth under
{{ {
Ġcontribut es
Ġtoler ance
Ù Ĭ
Ġpr ay
g uez
ful l
ĠK and
Ġexpl orer
1 10
ro gen
ĠBerk shire
ĠWy att
ĠRep orts
urg y
Ġ179 6
ĠJud y
Ġd rif
Ġz omb
ĠCal d
t ier
ĠR i
and ez
Î ·
ĠR ama
Ġte ens
Ġgymn asium
ĠN aw
196 6
Ġslee ve
Ġf ederation
v ous
ĠH C
ĠMur d
ab o
Ġexc use
Ġpatri arch
Ġfam ed
Ġrede velopment
Ġw eld
ĠB ing
Ġch ancel
ĠSt eele
Ġcharacter ised
Ġup ward
ath ing
Ġf ont
Ġdup lic
ĠAntio ch
Ġtrack ed
ĠT ales
ul se
G I
at ur
ol ation
Ġbat ch
G ame
Ġblock ade
Ġdemonstr ates
T er
fer red
He art
W ild
at ore
pro of
ĠB rick
ĠOw ens
Ġtoile t
Ġaltern ating
Ġsymmet ry
Ġkind ergarten
Ġexam ining
Ġs acks
ĠZ Ã¼
ĠS I
ĠL j
Ġurg ing
Ġprolong ed
Ġcomment ators
Ġit er
ĠBra un
Ġdel icate
R adio
Is lam
Ġhab its
L iber
ĠAss am
F ore
ĠB olshev
Ġun se
a qu
ĠCar th
ĠFal cons
D em
ĠCar bon
Ġele phant
or an
Ġs aints
Ġeleg ant
ĠL ep
ĠBi har
Ġless on
ĠCey lon
ult on
ĠL una
ĠV ia
ĠNam ibia
Ġfeud al
ĠC ould
Ġbl ades
ĠVer de
ĠP urd
ĠW N
Ġdist ract
Ġwars hips
Ġprocess ion
ath olic
Ġaim ing
ĠW ine
Ġens ured
Ġup stairs
.. .âĢĿ
Ġfinal ists
Ġass umes
ĠPol es
rÃŃ guez
ĠMerc y
Ġalumin ium
x y
Ġ178 9
n ine
Ġpione ers
Ġretail ers
ĠAn k
ĠMon aco
ograph ies
ĠPhill ies
ĠChamber lain
ĠAut om
T imes
and e
Ġentertain ing
Ġport able
Ġre issued
Ġj un
Ġrel iability
ew ood
Ġpre jud
ĠDev ils
ĠC W
Ġr anged
ĠLim erick
at ical
Ġsome body
ĠCh ong
Ġb iod
Ġ( #
ĠW et
Ġsol itary
R em
ĠTh ink
Ġacqu aint
Ġmur m
son ian
ar ina
Ġm osa
Ġphotograp hed
Ġa fore
Ġdiss em
ĠCert ificate
tt es
196 4
Ġimmigr ated
Ġpill ars
Å ĳ
ĠJenn ings
Ġchar tered
pur pose
Ġtrust ee
F i
ĠCol lier
gu y
ĠS au
Ġconfron ts
Ind ian
ĠVander bilt
N et
oss ibly
Ġpack ages
b ands
Ġastron omy
n ie
Ġcheck s
12 5
Ġtre ason
orr aine
och ond
ĠBuch anan
Ġculmin ating
Ġup held
re hend
Ġl ent
Ġmist ress
ter min
Ġed it
def ined
ĠS uf
ĠG iles
ĠC oul
Ġautom otive
a er
ĠBeir ut
Ġillustr ator
ĠOkin awa
Ġdomin ate
ĠSol id
w ife
Ġem blem
ĠRod rÃŃguez
Ġs ells
ĠZ ak
Ġcock pit
g el
Ġfor ts
ĠMich a
ĠJon as
Ġl ou
Ġn ud
ĠSher idan
roph ic
R ight
p he
Ġre app
ĠCh ance
ĠX II
ar ro
ĠT S
Ġsepar ating
ĠGodd ess
ĠTud or
Ġde port
Ġdem ographic
agon ists
br ates
ĠM ae
Ġser vers
Ġcub ic
Ġcandid acy
ĠG ap
ĠX ia
Ġsal mon
Ġbrew ery
ĠVen etian
? '
Ġalleg iance
Ġcomb ust
c asters
Ġg ases
ĠR I
Ġ17 76
Ġtransl ates
Ġdisplay ing
ĠKurd ish
ĠF arr
U M
ĠAb el
Ġprivile ge
ĠCarm el
ĠLaf ayette
Ġl ava
Ġpost season
ĠBeaut y
it le
Ġpart ed
ĠGl ad
Ġf ooth
Ġgl oss
ĠCros by
B at
st ation
Ġd uel
Ġtrans cript
ib us
Ġconstitu ent
s ided
Ġs orts
ul am
Ġ11 3
Ġfarm land
op ot
Ġn oun
on ge
Ġatt ach
ĠOl ive
Ġth ou
Ġres ervation
Ġpark ed
Ġfav oured
Ġobst acles
Ġvamp ires
Ġarbit rary
ĠF S
ric anes
ĠChrist ina
us ions
Ġbl essed
Ġpsych iatric
fl ix
ĠW ey
Ġ12 00
Ġkingdom s
Ġfres co
ĠEv elyn
ĠAr row
Ġ13 5
ĠPlate au
Ġutil ize
Ġpilgrim age
et i
Ġactiv ism
Ġenthusi astic
ĠCh ip
ob ia
h ara
ĠR F
ĠEll iot
ĠH ang
ar ie
Ġhomosexual ity
ĠV C
ar b
Ġglob ally
Ġp add
S ure
N I
ĠQuart et
Ġpat ches
ĠChand ler
T s
ĠJ ob
Ġout line
ru ce
ĠBow ie
ĠWat ts
Ġunf air
ĠDev i
ĠN ile
Ġrever ted
il is
ĠLe inster
ag her
A li
Ġne ural
oth ic
Ġwheel chair
ĠHer tford
ĠRef uge
R oy
Ġdeb ated
ĠMos que
ator ium
Ġrecip ients
Ġd ash
ĠEarl ier
ĠAndre as
ĠSh ri
X X
ĠT ou
Ġw ax
ĠEis enh
Ġp its
Ġr ats
h ome
cons cious
ĠApost olic
Ġpres erving
Ġcr ude
h aven
ĠEns emble
ans en
Ġprem ature
Is rael
ns ic
Ġoblig ed
ĠW ah
ĠS ept
Ġpharm ac
Ġinf amous
on te
Ġcommun es
ĠKrak Ã³w
l ich
Ġdisc rimin
Ġhon oured
st ud
ĠChev rolet
Ġf el
v re
Ġbr akes
the med
Ġmus h
Ġfin ed
Ġchief ly
ĠJub ilee
ĠI k
Ġconting ent
ĠL Ã¼
or ie
Ġlat itude
st ore
Ġpassion ate
Ġoff ence
O H
Ñ ı
Ġtake over
Ġincred ible
am orph
ĠP ors
Ġadmin ister
l Ã©
Ġdr ill
ĠN ice
Ġcommun al
Ġre pt
ĠN ames
ĠBos nian
ul er
ĠB am
ĠMe gan
b ins
ĠAb ove
Ġneg lect
Äģb Äģd
it ating
Ġannounc er
ĠC oss
Ġob solete
att ack
ĠEst her
Ġimm ense
ĠHuman ities
Ġinc oming
Ġfr igate
ĠC annon
ĠSt irling
ah ar
ad ar
iot ic
Ġlicens es
fess ional
ĠEnt ry
ch an
te f
ĠGlou cestershire
Ġcomp are
Ġle ts
Ġdon or
Ġh id
Ġdis lik
Ġv oid
De ath
ĠV or
ship s
B road
ĠL eningrad
Ġ179 9
ĠO ss
Ġsign aling
Ġprev ents
Ġscr ub
Ġhorn s
Ġcrowd ed
d ar
ĠCl ose
et us
Ġnew com
Ġpop e
Ġbr ake
ĠT ouch
g as
Ġre election
iss on
Ġ11 6
ar cer
Can adian
Ġdict ators
en ov
ol esc
Ġpet roleum
Ġliber ty
ĠGu am
est abl
ĠRec on
ĠR ous
Ġy acht
ĠVol ks
Ġcanc ellation
Ġfreel ance
ĠNicarag ua
est a
Ġrenew able
ter dam
arent ly
ĠElect rical
Ġtur ret
Ġreluct antly
I rish
ĠHav ana
ĠK ut
Ġ7 50
uss y
ruct ive
Ġeval uated
Ġadop ting
Ġinters ects
Ġacknow ledge
Ġknock ing
ific ant
ĠMarket ing
ĠEm erson
ĠN iz
os i
Ġl av
ĠEl vis
ĠG ret
Ġstri pes
Ġcon e
Ġlabor atories
ĠL ough
s ers
Ġlegit im
c s
å ¤
ĠMans field
ĠSi oux
ĠB old
Ġinv alid
an ie
Ġpopular ly
Ġpack aging
Ġrel ies
Ġb ip
ĠElect ronics
ĠSwan sea
Ġpres cribed
Ġspecific ations
uli ar
Ġdeterm ines
Ġbreat he
Ġcontempor aries
Ġtr agic
Ġconfirm ation
Ġpres idents
ĠCom ing
ĠCour ts
ĠEm manuel
Ġarr ange
Ġlov ely
ck er
ĠThe ss
sp ons
Ġmen u
G R
Ġcor pse
Ġsw amp
ĠLow e
Ġconver ting
ĠEn c
á ĥ
ĠDe leg
sp oken
Ġfilm makers
an ey
Ġat om
Ġconqu er
Ġsol ving
Ġexam inations
ĠSch olar
S axon
ĠSt ella
Ġclear ance
Ġbul lets
he arted
Ġcr ush
Ġj er
Ġmort gage
Ġinc ap
Ġprop oses
Ġcons ul
Ġdom est
Ġtelesc ope
ĠV iolet
ĠH imal
ĠS we
ia ison
Ġd os
Ġpuzz le
oper ation
Ġwh or
ĠClif ford
ĠT rap
Ġvill a
Ġinnov ations
ĠS ources
Jew ish
Ġref ined
ĠLex ington
ĠWik ipedia
worth y
Ġdes ires
Ġw ishing
pl ess
it ri
av is
ĠS utherland
ĠA K
ales e
ĠV amp
Ġexpress es
up ta
ĠStr as
ill ary
Ġk ern
ĠEl m
ĠRah man
ĠM um
p iring
Ġpod cast
ĠC rew
Ġper imeter
Ġstat utory
ĠW R
Ġtr icks
og i
ĠBol lywood
Ġassass inated
ĠGood man
Ġunn ecessary
Ġb en
ĠG ior
Ġinv isible
ĠLight ning
Ġbo iler
ĠC het
10 1
ĠH M
Ġtu ition
Ġbe ams
ĠFl ood
Ġsymp ath
Ġacceler ated
ĠD ictionary
Ġrecruit ment
ĠPro ducer
play er
ĠW arm
n is
Ġl one
cl er
ĠH of
Ġpers istent
ĠD raw
q a
Ġc os
ĠH ancock
Ġline backer
Ã¢ hu
Ġspokes person
C amp
ĠS ent
ĠT ry
od us
od rome
ĠLa os
Ġdram as
Ġball oon
ĠThor nton
Ġenvelop e
Ġen forced
Ġcan oe
ĠLev i
ĠP erman
ĠRes cue
th ia
ĠDan ube
Ġbless ing
Ġdef ences
ĠC hern
à °
Ġw oke
ĠMarc os
ĠM illion
Ġdi abetes
Ġp enc
ĠCh it
Ġimpr int
c hem
in ished
ĠK ry
Ġserge ant
Ġp ix
Ġastron omer
over ing
Ġreign ing
Ġkick ing
ĠEp isode
Ġfur ious
Äģ r
ĠW elfare
Ġgroc ery
Ġl att
ra j
Ġge ology
ident ified
Ġfl uct
Ġprincip ally
ĠCatal onia
P ass
ig ue
lin ear
Ġident ities
Ġrepr inted
Ġsqueez ed
Ġpat ented
ĠRes ort
Ġf auna
Ġpled ged
T M
Ġtemper ate
s sel
ĠSch um
Ġel bow
Cap tain
Ġhe ights
ĠCoast al
Ġhydraul ic
Ġcl utch
Ġrece ivers
friend ly
ĠS ain
Y P
Ġfl aw
Ġbrick s
t able
ĠB ury
Ġover c
ĠAl v
ĠZ o
h ound
t ank
ou k
hen y
ĠJohannes burg
g uitar
Ġsix teenth
ĠStep hens
n umbered
ian c
Ġsur plus
ra x
Ġqual ifications
ĠNational ist
at ivity
Ġresemb ling
Ġrailroad s
Ġsanction ed
Ġ179 7
Ġphilanthrop ist
government al
Ġmemoir s
Ġcho oses
Ġam ass
ĠE MI
Ġthir teenth
Ġnational s
Ġox ide
V E
Ġbutt ons
ot illa
Ġadapt ations
Ġadministr ators
Ġconclud e
Ġdead line
ĠLand ing
ĠRap id
Ġslam med
Ġportray ing
ĠD R
ĠHarri et
Ġrepl ica
Ġdisapp ro
appropri ate
Ġpost ers
ĠSav annah
ĠTerrit orial
ĠPÃ© rez
Ġl apt
Ġcurrent s
f light
sk ins
ĠHer c
Ġjust ified
ĠG ros
iy ah
Ġwarm ing
Ġunexpected ly
Ġ11 4
ĠS ens
ĠBrother hood
ĠC oc
ĠH es
ĠWell es
Ġw al
orig inally
ĠTor ah
ĠF urn
Ġcapt ivity
Ġembr aced
Ġundert ake
Ġanaly zed
ĠW emb
rank ed
p ike
ĠH ogan
Ġ u
Ġt unes
Ġinc ur
ĠNorth ampton
Ġm ound
Ġapprent ices
ĠMon ster
Ġredes igned
Ġsh ark
Ġr h
Ġfather s
ĠF ors
og ne
ux e
Ġmerc y
j ani
Ġaddition ally
Ġhun ters
st aff
Ġrib bon
Ġcook ed
opp osed
ĠLiving ston
ĠTob y
ost a
Ġv arsity
Ġtext ure
Pr ince
inos aur
ow een
Ġwhere in
enn es
f alls
ĠTr uman
aj o
Ġspecial ised
cha ft
ak an
ĠV es
im us
D ou
ib e
19 40
Ġenjoy s
ĠVal le
ĠItal ians
Ġle ak
ast rous
Ġde gradation
as co
Ġambul ance
Ġsc ram
Ġp p
Ġsur ge
Ġconcess ion
ĠD Ã¼
Ġem ission
ĠN igel
Ġdecre asing
Ġg own
Ġprob able
Ġgrad ual
Ġb olt
ĠP ok
ĠC ron
Ġsuperv isor
ĠS ieg
ah on
Ġappro ve
Ġtrou t
Ġun av
ĠBur mese
ĠArist ot
Ġneg lig
Ġtuber culosis
ĠCy pri
Ġafore mentioned
Ġse ize
Ġdiffer ing
Ġresp ir
ĠWe iss
ĠJournal ism
urg ery
ĠCaucas us
ĠLe h
Ġcard iac
ĠBudd y
Ġunder gone
Ġj umps
ĠCongress man
Ġple as
ĠH itch
ĠCon tr
Ġbureauc r
ess e
Ġearn ings
Ï ħ
Ġdis rupt
Ġaw aken
ĠEisenh ower
oll ah
ĠA val
ĠB irds
D ream
Ġin active
ĠI GN
Ġretros pective
ĠVol leyball
Ġdenomin ations
AP TER
Ġp ays
ie ves
ĠMart y
Ġsn akes
Ġg igg
Ġfoc al
Ġpun ished
Ġjurisd ictions
m ount
ur rection
ol son
l io
Ġplay ground
Ġcop ied
ull s
Ġb red
Ġd un
ĠBeaut iful
ĠVaugh an
st y
Ġscholars hips
ĠBy rd
Ġsubscrib ers
con f
U A
ies el
Ġclass ics
off ic
ocr atic
an us
ĠAtl Ã©tico
Ġharm on
Ġlit igation
Ġspecial izes
Ġsurprising ly
ĠK es
F R
eng ers
Ġrevel ation
Ġmean while
ĠL ich
ĠFow ler
vol ume
Ġper cept
Ġreview ers
Ġcens orship
Ġnorth ward
Ġf Ã¼r
cl ed
Ġfoot steps
Ġpar ap
ĠR im
lighten ment
ĠN R
ĠK iel
ĠSc ript
ĠNet flix
tex ts
M id
ĠC oy
op hyll
Ġpol ym
Ġam en
ĠA CC
und erb
to o
ĠHol iday
Ġv i
Ġapprox imate
Ġsoft ball
ĠM ia
g ets
Ġprot oc
Ġlog ging
ĠOtt omans
Ġr er
Ġgen ius
Ġstandard ized
ĠBur lington
Ġroof s
Ġinequ ality
Ġup wards
P ierre
ÅĦ sk
m u
19 20
Ġfix tures
ĠGib bs
ĠCongreg ation
qu a
ex per
ĠR ider
Ġtele communications
Ġintercept ions
ĠD ante
Ġinvestig ators
ĠW ii
sy stem
B ob
ĠQu ad
Ġext racted
Ġlow land
ĠDh aka
Ġopt imal
Ġoverth row
Ġland ings
Ġexcav ation
ĠPione er
Ġoff set
Ġcamp ing
Ġchar m
ĠWhe el
Ġden ounced
Ġheir s
Ġmon astic
D a
y i
ĠJud ith
ru ff
Ġaccording ly
f aced
Ġalter ations
M or
Ġinc arcer
Ġche aper
Ġemp ower
ĠC M
Ġtrail ing
Ġexch anges
st ring
Ġpre view
ĠGe ological
Ù Ī
rib es
Ġang ular
ĠBox ing
Ġpromot ions
ĠZamb ia
C ons
ĠSer bs
Ġhered itary
Ġre branded
B P
Ġcomp osing
c ultural
ĠJess ie
Ġt ones
ĠT otten
ĠBus ch
Ġgrand parents
Ġrat ified
Ġexplos ives
ĠTow ards
Ġpres ently
ĠGl ory
ĠMart ÃŃ
oul t
L M
ĠT A
Ġsan ctions
ĠK ram
p ublished
omorph ic
ĠRot terdam
Ġbab ies
tt emberg
ĠAd j
ov al
Ä Ĺ
ĠHer oes
Ġcl iffs
ĠAlger ian
ĠD mit
me ga
Ä ĳ
ĠAm ar
Ġsign atures
Ġnarrow ed
W el
Ġj okes
b ear
ĠTreas urer
m illion
Ġw ors
l v
Ġapprent ice
196 3
Ġdign ity
ĠS ek
Ġepid emic
ĠH aus
ĠConc ern
ĠE gg
Ġmon asteries
load ing
ĠG entle
Ġdimin ished
Ġc ables
Ġex ecute
ha el
Ġop ener
Ġst unt
Ġsymp athy
Ġris en
Ġh ailed
Ġgr ateful
ip ing
ĠOr t
pect ives
hat t
te acher
Ġch ant
ĠMir ror
Ġt ertiary
Ġrock ets
ĠPr as
Î ²
ĠO dd
iet al
Ġb ir
âĢ ²
Ġcon clusions
ĠLag os
ĠJ ab
ĠBr an
Ġto es
A k
us z
Ġexp ans
M eg
p ical
Ġcollabor ations
gr aded
ĠPres idency
roscop y
Ġw olves
uff le
ib les
ĠTw ins
ĠMozamb ique
Ġobject ed
Ġmand ated
Ġinv ari
w ere
ĠHor ace
al on
Ġa rom
Ã¡ z
Ġju ice
Ġdesper ately
ĠC ic
Ġparticip ates
ĠPremi ership
ĠBrown e
ĠNat alie
ĠOff ensive
ĠRand all
ĠApp alach
olec ular
Ġmot iv
ĠB ills
É Ļ
Ġpharm aceutical
ley s
Ġmut ation
we ed
ĠWrit ten
Ġarch bishop
Ġadvert ised
Ġunp op
ĠSt ad
Ġvow els
Ġforeign ers
es ch
ĠD E
Ġdiscover ies
Ġcer amic
Ġinv ite
ĠHaw th
Ĩ Ĵ
ĠPl ans
Ġcat ast
ÃŃ k
aren cy
ĠE ly
Ġ17 00
Ġde ported
ons on
Ġbre eds
Ġoblig ation
Ġde ities
Ġtremend ous
ĠMerc er
inc k
Ġmotif s
Ġra ises
ĠÅ Į
Ġash ore
ĠN ab
ĠK uala
ĠWil ts
bet ween
Ġprinc es
Ġd ot
Ġaw ake
ĠW inners
ĠG Ã¼
ra ff
V S
Ġnight club
Ġproduct ivity
f if
ĠLuc ia
ĠLincoln shire
Ġincarn ation
ĠFl int
Ġmerg ing
Ï ī
ounc ing
W omen
her ical
mark ed
ĠDe er
til es
Ġpav ilion
ĠZur ich
met re
P a
Ġle ver
Ġall ocation
n ame
Ġwh ale
ak in
ool s
ĠEp ic
un ched
Ġres istant
eth oven
ĠInt ro
ĠY ar
ĠAm elia
ĠG ent
ĠR ang
ĠWemb ley
ĠSp ani
n ar
Ġmurder er
Ġfung us
ĠEconom y
Ġcreat ivity
Ġphr ases
ĠfaÃ§ ade
Ġcoc aine
Ġd anced
ĠDream s
ĠComb ined
ag us
ĠDav en
Ġr ang
Ġstock s
com mit
ĠArch ive
Ġarrest s
Ġmethod ology
Ġmarg ins
Ġturb ines
Ã¼r ttemberg
ĠIn st
Ġad miral
ĠColomb o
Ġab duct
od ont
Ġheavy weight
Ġd rowned
Ġl umin
Ġnum erical
Ġfore most
ĠDal ton
ay as
Ġ24 0
ĠKh or
ĠCas ino
ĠMack enzie
ĠM ai
man y
ĠB ant
Ġdis bel
Ġvalid ity
Ġfl ute
ival ent
Ġdefend ants
ĠRecord ings
pl er
Ġsem ester
ĠWh ich
ĠSuz uki
an se
Ġmet h
Ġdetail ing
Ġtrans gender
Ġmill ennium
air n
Ġdis astrous
w i
Ġac re
cro ft
Ġmonop oly
E ven
Ġpe asant
Ġcompar ative
Ġtro l
Ġcry stals
ĠRen Ã©
ĠW ords
ĠMon k
Âł .
Ġprop eller
Ġgraz ing
ĠKilk enny
F ire
ol er
Ġdenomin ation
ĠL us
Ġorn ament
ol ini
gest ion
es ome
kef eller
ĠZ hao
ev a
ĠSam antha
Ġsat irical
t ape
ĠO F
osl av
Ġdep uties
al ai
Ġrail s
Ġdiscip les
Ġe ternal
Ġrecip roc
ĠCh ow
ĠNag ar
Ġopen ings
ul atory
ĠL ob
Ġbr ushed
Ġcros sover
ĠH udd
Ġconfisc ated
Ġro wing
ĠHoff man
ĠNick el
Ġcru isers
y ang
Ġnew est
ĠMon mouth
Ġcast e
ĠE sk
h it
Ġtax ation
Ã¢l Ã¢
Ġconsult ation
Ġlast s
ĠCon way
ow ay
ĠAn ch
Ġplant ing
n h
ĠSt ream
ered ith
Ġcost ly
ĠCap t
Ġrest oring
its u
Ġill usion
Ġbl onde
Un iversity
Ġair plane
M ag
Ġsqu ares
ĠWe ap
ĠZÃ¼ rich
ĠH ipp
Ġin herent
pp en
W il
V ir
Ġrenew al
1 000
erg ies
v ich
Ġl an
ĠC aval
ĠL ump
Ġthreat ens
Ġvir gin
ĠSt a
ft w
ĠDirector ate
Ġsau ce
ich o
ĠTal bot
p ret
Ġd ictionary
ĠQu ick
s z
Ġeval uate
he a
ĠL iang
D in
in ement
Ġvoc ational
ĠT ram
Ġestablish ments
Ġspend s
Ġmark ers
ops is
ĠDem on
ĠO aks
Ġabd omen
L ord
20 19
ĠKa iser
Ġw inger
Ġsub group
196 2
d og
col ored
Ġsure ly
ĠW ash
ug ly
Sund ay
ĠH ilton
ĠAur ora
Ġspecial ists
Ġanticip ation
Ġb ug
ĠAss ess
Ġmean ings
ĠSh ot
Ê »
ĠG ear
Ġ12 2
Ġmet hyl
ĠX III
Ġob li
; "
Ġmy st
Ġarm ament
z ong
p ole
ĠA ve
Ġle aked
d ue
Ġin duction
ĠH ick
Ġinstit utes
ĠWake field
ĠQual ity
Ġap ology
Ġdam s
Ġb asket
ĠS ok
ĠR Ã©
aun ch
ĠL up
ĠNass au
Ġo mitted
V B
Ġc ope
Ġmoist ure
L ist
ĠDep ort
ĠArchae ological
Ġdram at
ĠM ish
ener y
Ġsevent eenth
Ġfin ances
Ġparam eter
us er
ĠW itt
Ġcoll oqu
ĠT ip
Ġmut tered
ĠRajas than
ĠV era
ind y
Ġsurf aced
Ġen vision
Ġroll s
ĠTal iban
Ġsupp ression
Ġexclud ing
Ġdwell ings
Ġchap lain
iz arre
Ġdisc s
ĠBar row
ĠSe ga
D isc
F ree
ĠP az
ĠCrom well
Ġbi ographer
Fr anc
ĠC ars
Ġ179 1
Ġgas ped
educ ational
ĠCH APTER
Ġpy ramid
On ly
ag raph
Ġcl ashes
Ġcl ips
Ġad s
ĠMal i
Ġabsor ption
ac ious
Ġsplit ting
ject ive
Ġdes erted
Ġcongreg ations
Ġun opposed
hold ing
Ġann ounce
Ġneg lected
Ġmonument al
ĠBohem ia
Ġcolor ful
Ġalco holic
Ġtreas urer
Ġcy ber
Ġconcept ion
Ġanaly ses
ĠBorn eo
ĠPav ilion
Ġb unch
Ġrem atch
ĠTuls a
at ti
ĠFrank ie
est o
il in
ĠB iblical
Ġstr at
Ġfig ur
ĠCD s
Ġfl avor
ĠK ip
Ġchem ist
ĠPle asant
" <
Ġkill ings
ĠBe er
ĠM BA
ĠSlov enian
Ġins ane
it imate
ĠL ester
Ġsimpl ified
Ġrelie ve
est own
Ġrepl ay
ĠGu est
ot ica
Ġcl ad
ut i
Ġst ain
rol ogy
Ġdismant led
ĠU b
ĠSt am
ĠD illon
if iable
ĠAf ro
het ics
ĠJ ade
og enesis
Ġillustr ation
Ġs ar
ep ort
Ġread ings
ĠAnt oine
Ġnames ake
Ġdoub ts
ĠCons ort
Ġsuper st
Ġintegr ate
) )
Ġsw ear
ĠRe formation
ĠIr vine
ĠJ ed
ĠRoc kefeller
Ġstrengthen ing
Ġcompass ion
A sh
es is
Ġchar ities
ĠRes istance
ĠH oy
Ġair lines
Ġur ge
196 1
in ely
ĠAl pine
ĠÃ ĩ
Ġhe els
Ġcent red
ĠNi agara
Ġb ubble
Ġ17 75
ĠHere ford
uk h
Ġt apes
ĠRest aur
C I
Ġ11 7
19 39
J ul
Ġdyn am
A ut
Ġl amps
Ġincorpor ation
ew orthy
ĠRock s
ith m
ĠSh iv
Ġtut or
Ġeast ward
Ġpsych ologist
Ġun used
Ġnerv es
Ġpol es
Ġfib ers
Ġcl ans
stand ard
Ġsil ently
ĠMill ennium
ĠExt ra
Ġbe ans
ĠSp y
Ġsty led
ĠLik ewise
Ġconst ellation
Ġvarious ly
Ġafford able
ĠJ ourney
Ġrec alls
ĠBo one
ĠN K
ĠPur ple
n ell
ĠId ent
Ġkidn apping
ĠP D
ĠN ue
ĠAl s
ox ide
S pe
el man
Ġdistribut or
ĠInvest igation
on ut
or is
Ġcl er
c ourse
ĠCirc us
ĠPublic ations
ĠR ide
ĠTerr ace
? ",
M ore
K ar
ĠCanad ians
ĠProv ision
ftw affe
ĠK ah
. *
Ġdiss ent
ĠB enny
Âł in
ries thood
ĠSal am
ĠPlat form
Ġden otes
Ġp arl
Ġst rap
Ġdisc ourse
Ġscen ic
ĠRe venue
ĠS ustain
ĠKir by
Ġepit het
Ġsubstit uted
j ana
m ine
Ġsulf ur
Ġt ires
il and
ĠFre ud
Ch arl
Ġcig arette
M ost
Ġlyr ical
Î ¯
Dan iel
ĠCon cer
Ġs ack
ĠAc ad
B us
ot ics
Ġcirc ulated
Ġb ored
ĠMoh amed
Ġoverl ap
lif ting
G er
Ġintention ally
Ġm ans
ĠJ ude
Ġb ilingual
ĠWolf e
I mp
ĠY ong
Ġbotan ist
Ġbehavior al
il ight
ale igh
Ġnational ity
ĠV ine
s ervice
Ġqu ote
ĠBl ind
ĠStephan ie
Ġintellectual s
em ann
Ã³ r
od er
ĠBru ins
ĠCr im
organ ized
ĠGran ada
Ġbetray ed
Ġbalcon y
Ġdefin itive
ĠBul let
ub en
Ġdig est
Ġmerchand ise
ĠV ig
Ġign oring
Ġre nder
Ġforg ive
h ak
n ation
ĠAx is
ĠSand ra
Ġcoinc ided
Ġpr inter
ĠA in
Ġgene alog
ĠSp ot
Ġprohib ition
ĠVers ion
P et
ĠSig ma
ouri er
Ġo ch
ĠClif ton
ĠScholars hip
o za
Ġon ward
Ġav ant
sequ ent
ĠNathan iel
Ġv ivid
Ġmamm al
ĠMugh al
Ġtreat ies
ĠBax ter
eb urg
ĠImp act
C la
Ġ17 5
Ġinflu x
ĠAud io
Ġst ub
low er
Ġprov ing
ĠTradition ally
) <
ĠÅģ Ã³d
IN G
ĠA yr
ĠN ah
ĠMarx ist
Ġhapp ily
ĠN amed
Ġpir ate
Ġguerr illa
G en
a an
Ġmis under
Ġlik elihood
Ġhom estead
Ġh int
Ġcar ing
Ġundis closed
f ur
ĠE ck
Ġinspect or
Ġcustom ary
f illed
ĠD ex
Ġ 00
ĠMy r
ĠAut umn
ĠPep per
ol ulu
ad ors
Ġcomment ing
Ġliqu or
ĠMar quis
ic acy
ĠQu Ã©
Ġshel f
er get
Ġp ockets
Ġair borne
Ġneed ing
ĠL ives
Ġclim ax
ĠR ear
ĠInter active
Âł 3
Ġborn e
Ġver bs
Ġprol ifer
Ġnut rition
ub le
ĠSav oy
Ġf iling
Ġreal ism
ĠNorth umberland
ĠA very
ĠPart icip
b age
Ġsub set
Ġwer ew
ĠT ier
Ġbest owed
Ġsound ing
ĠX i
ĠRain bow
ĠE ighth
ĠT et
ĠN ell
om ac
ĠEr in
ĠSet tlement
ĠRic ardo
ĠStafford shire
Ġpron unciation
Ġelev ations
Ġcontribut ors
Ġbuild s
Ġpro be
ĠNetwork s
Ġsupport ive
Ġeduc ate
ĠT ale
het to
Ġfl ipped
ĠThere after
Ġout ward
ĠElect ions
ĠFact or
Ġbr ave
k ie
Ġp ept
M aster
H i
s ley
e ason
ans om
Ġl enses
Ġs ob
Ġconfess ion
ul g
ĠS abb
Ġunf inished
Ġindirect ly
ĠG ao
Ġal k
CO M
ĠD il
Ġtempor al
Ġcorrel ation
Ġsegreg ation
ady s
Ġsuggest ions
ĠBlack pool
Ġdes irable
Ġcomp elled
Ġperiod ic
Ġexceed ing
haw ks
Ġsp ill
Ġint ric
Ġarchae ology
ĠSchne ider
ĠRes ident
ĠBord eaux
ĠManufact uring
t ech
Ġsen ators
ĠWild erness
inc y
ĠObs erver
Ġpic nic
Ġeight y
Ġbesie ged
ĠRy der
Ġinaug uration
ĠBh ag
Ġcommit ting
Americ ans
Can ada
ĠC ouncill
ĠSmith sonian
ĠLaure l
Ġt iger
g ia
Ġhelp ful
arl ing
Ġpost graduate
Ġload s
min ent
ĠPa ula
Ġfr anc
ĠSene gal
Ġman ned
ĠMcC l
pat rick
as im
gr av
Ġcl ue
ĠB ound
ĠX IV
ham a
ĠThe ology
ĠT usc
uel a
idel berg
ĠM eredith
ĠP une
Ġdecre ases
ĠBe ethoven
t elling
Ġdepart ing
ĠÅģÃ³d Åº
ĠF ew
Ġshel ters
Ġhero ic
Ġcan opy
ĠPers ia
ĠV ari
K S
ĠW ise
Ġshe ar
Ġhist ories
ov sk
ĠH iggins
Ġflat ten
Cl ass
ĠCommission ers
Ġec ology
Ġf usc
Ġphyl ogen
g ars
it ations
Ġh ij
ĠAfric ans
ij k
ĠRoy als
Ġi OS
ĠT ad
ĠN HS
ĠY un
Ġcirc us
id as
ĠV ocal
ĠS ug
roscop ic
Ã¶ l
Ġconven ience
Ġpec uliar
ĠByr ne
ĠL lan
Ġmilit ants
EE E
Ġd uke
Ġsp iders
ĠNor ris
f o
ĠDart mouth
Ġdiss atisf
Ġecho ed
Ġs oprano
Ġmat urity
Ġdet on
os aur
ĠMad ame
Ġv ass
ĠZ immer
Ġsupply ing
ĠJ aw
Ġg az
ĠL oy
ĠE A
St op
ĠRed skins
ĠBhut an
r ace
ĠPract ice
Ð¾Ð ²
L T
ĠGab ri
t aker
ĠTrib unal
Ġbarrel s
Ġlog istics
g ard
l ag
ĠN Z
Ġrad ial
ĠN im
orn o
ric ting
Ġdis l
Ġneighb ours
Ġweek day
Ġaccomplish ments
ĠCh ung
ĠHor izon
ĠH T
Ġsurviv or
Ġsuff ers
ĠWild cats
ĠD ial
est rian
Ġsn out
R aw
Ġob ey
b ee
b ol
lin er
ĠMac au
Ġflex ibility
Ġpoison ing
Ġrel inqu
Ġhur ling
ĠZ ap
Ġharm ful
ĠLot us
Ġbrand ing
ĠP hel
Ġexerc ised
Ġwhit ish
ĠDoming o
Ġp unt
ĠW arrior
G re
Ġl ied
ĠProduct s
ĠHunting ton
M s
Ġch ased
Ġconstit utes
Ġtable t
ĠTerrit ories
Ġconce aled
ĠPl atinum
c us
ĠT ipper
ĠWhe ther
ĠTob ago
uts ch
ru z
Ġflour ished
ĠY us
Ġins ists
pt ions
Ġhard core
Ġutil izing
Ġfold ing
ĠH ector
Ġrob ots
Ġdr iv
Ġtim eline
Ġb ureau
ĠW o
Ġen erget
Ġplat oon
ĠCret aceous
ĠI ch
ĠR ach
Ġrestrict ion
ĠEn cycl
Ġconcur rent
Ġpropri etary
ĠH anna
em aker
ann ers
ĠRey es
eg u
Ġimmun ity
Ġhost ilities
y ar
s ens
second ary
ĠHus sein
Ġamend ments
ogene ous
ĠW ent
Ġv eto
Ġfl ats
Ġcr us
Ġdig ging
ĠSiber ia
ĠMad h
Ġvis ibility
it one
f its
Ġle x
ĠF lynn
Ġpol o
ĠHind us
Ġtor que
Ġaccess ion
ĠEver ett
ĠMar vin
Ġn ests
ĠP up
osy nt
ĠSal on
direct ed
ĠAnim ation
V an
Ġport rays
ĠHard ing
Ġyield ed
r ans
sm all
Ġsail or
ĠTex t
Ġrespir atory
C oll
ĠMoroc can
Ġgr asp
ĠPh antom
T im
ĠBrem en
ĠCop per
Ġjust ify
ĠEv ents
odynam ic
ĠAle c
r ath
vent ional
Ġprov es
ĠParalymp ic
ign on
ĠPerman ent
ow ice
ĠSh ould
Ġmar ijuana
ĠHess e
Ġinterf ere
Ġs way
ass ium
Ġovert urned
S oviet
ĠN olan
Ġcon ject
Ġunpop ular
un ate
ĠIm ag
ĠMil o
ĠLev y
Ġfulf illed
id ine
3 50
Ġbar red
Ġcous ins
uzz le
ĠWilts hire
Ġengine ered
Ġderiv atives
ĠIs mail
CA F
Ġflank ed
w agen
Ġad orn
Ġreass igned
ĠEd mond
ĠKem p
Ġcl ash
ĠTim ber
ĠBrand enburg
rop ic
Ġr idges
Ġsab ot
ĠDipl oma
Ġa rous
ĠS N
oll en
ĠEnter prises
Ġgr amm
Ġentr usted
Ġtatto o
ĠUS D
ĠL um
ĠAb by
ĠMed ina
ĠRod ney
ĠH uff
a a
Ġbro ker
Ġto re
ur ate
Ġwarn ings
ĠPerson al
ild e
ĠGovern ors
Ġadv ancement
ĠPres ervation
195 8
ĠBren nan
ip es
g ue
Ġgu ild
Ġdisg ust
Ġany body
Ġred und
ĠS aul
Ġwork place
Ġsw itches
Ġintens ified
ĠTrib e
ĠCob b
p ublic
ĠT us
Ġattract s
ĠI B
ĠHob art
Ġrefr iger
omot ive
ĠB P
Ġcan e
Ġvoc abulary
Ġmoder ately
Ġimportant ly
Ġrecogn izing
ĠAl ph
Ġcomp artment
ĠGod s
Ġspawn ed
M u
ĠL amp
Ġguard ian
ĠBak u
Ġstr ained
Ġsl ated
Ġo mn
Ġg room
Ġcass ette
Ġreinst ated
et or
S ar
H arry
Ġs oup
Ġagg ression
Ġilleg ally
ĠP ig
t rick
ĠR iding
enc hed
Ġimport s
ight on
og ie
Ġqu otes
Ġeyeb rows
Ġ( âĢľ
ĠMc Int
ĠGw yn
in ton
ĠUr du
is al
Ġfavour able
enth al
r ude
eb u
Ġterror ists
Ġapp end
ĠFort une
ĠMcM ahon
Ġc ites
Ġinev itable
ob iles
Ġ Âł
Ġf riction
Ġun iqu
ĠDepend ing
F orm
ĠS onny
end ra
Ġsk irm
Ġm ould
ĠWork shop
ĠAn ita
alf ord
Ġdep ressed
oss a
K a
ink a
Ġz ool
195 7
Ġtherap e
J im
Ġem inent
ĠAir borne
ĠTom orrow
Ind ia
ĠVik tor
ĠM aking
ĠK ass
T ri
y th
ĠRup ert
ĠMold ova
ĠH ubb
Ġnot or
el ig
ge ois
inc hes
Ġneed le
Ġpet als
ĠLaure nce
ĠB uzz
ĠO val
aus s
Ġfisher men
ĠW on
oul os
ĠMed ieval
à ²
Ġo ught
Ġbrow ser
Ġide ological
Ġt idal
Ġenc ycl
os c
Ñ Į
ĠR ig
km en
d ependent
ĠF eng
Ġgren ade
Ġdescend ing
ĠMcCart ney
Ġrecogn ise
Ġnorm s
Ġhum our
ĠLaw son
Ġviolin ist
ĠRac ecourse
ĠM aw
Ġbusiness men
Ġp anc
Ġconsult ed
oot ed
Ġbacter ial
ĠD ir
Ġair play
; "|
ĠTs ar
ĠO swald
K al
ĠC arrie
Ġkiss es
ĠBl o
ac cept
Ġrout ing
Ġpoly g
ĠF asc
Ġgen ocide
oon er
Ġdigit ally
Ġshot gun
un ner
ĠLif etime
Ã µ
Ġpay load
ĠSwim ming
ĠJama ican
Ġstrongh old
ĠK ost
i ating
R et
Ġm i
ĠR FC
R a
ĠBe e
ie le
Ġchromos ome
p ill
ĠS outheastern
ĠW ide
ful ness
ĠTotten ham
Ġreorgan ization
re viewed
is ors
Ġresur rect
Ġcast les
Ġarg uably
Ġcon texts
st ri
Ġsimpl er
ĠKy oto
Ġad vers
to le
Ġout c
ag han
ĠCh att
Ġbl u
Ġelig ibility
Ġas hes
Ġrequest ing
Ġlab elled
N Z
F ran
ĠSh ock
Ġdisc rete
Ġflo at
beat en
c ards
Ð ¼
F T
Ġst icks
ĠSub sequent
Ġfree zing
Ġconfess ed
Ġp agan
Ġpot ent
ĠCook e
ĠAp ache
ism atic
Ġconvinc es
Ġrep uted
ĠGe ographic
Ġcyl ind
b ig
ĠSat an
Ġset up
Ġglac ier
Ġrel ics
oll ar
Ġmount ing
Ġinvestig ative
Ġple a
ĠSpr int
ĠMcG ill
hyth ms
Ġd ividing
Ġse aw
ĠRom ance
bl o
Ġcalc ulations
ph ants
Ġcre m
Ġber th
S u
ĠW ak
ĠBol iv
ĠFar mer
ĠPors che
Sc ott
ĠE instein
Ġo st
iv ist
Ġa ide
ĠLow ell
ĠCustom s
ĠB aj
zz o
ĠEver ton
ĠCr ane
Ġdr illing
Ġ12 3
Mart in
Ġpath ways
Ġswe eping
Ġfor k
and r
ĠD M
do ctor
olph in
Ġengr aved
b ull
ĠH are
G reek
Ġweigh ing
ĠNear ly
Ġyellow ish
Ġtom bs
Gold en
ĠS ina
Ġbrig ades
ĠDo es
Ġ iv
ĠMc F
Ġk its
oc ating
ĠStr ange
ĠAl ison
old t
inc ome
ĠEll a
Ġpneum onia
á ¿
ĠW is
ĠVolunte ers
Ġwas hing
g em
Ġdet er
Dr agon
Ġbapt ism
rap hy
Ġthe e
bl ue
ĠD ut
ĠHas an
tr ak
ĠRob bie
Ġcomput ational
ĠIm age
Ġcommit ments
ĠL orraine
Ġ50 1
Ġde eds
ĠSa unders
Ġwet lands
am el
Ġbe es
Ġtrou pe
Ġder ive
L ady
a illes
ĠD ing
Ġerup tion
ĠV HS
V s
s ol
Ġsc roll
str Ã¶m
Ġver n
opot am
D un
Ġabsor b
Ġp ause
ĠN eal
Ġtou ches
ĠBalk an
ten ham
Ġacceler ation
Ġcampaign ing
Ġdisc ount
ĠC um
ĠSc ulpt
Ġz inc
Ġsuccess ors
ĠSom ali
ond uctor
ĠZe us
ĠOliv ier
ĠWolf gang
Ġinnoc ence
ipp ers
ĠUr s
ĠDist ricts
ĠD olphins
ĠSch les
Âłm g
ĠHon olulu
ay ev
Ġ178 3
ĠCl ive
al ine
Ġforg ot
Ġpurch ases
Ġaffili ates
Ġp riesthood
ĠE uc
Ġcollabor ator
ĠM Ã¼n
ĠG ad
ast a
ric ular
Ġval ves
Ġmultip layer
ĠRus so
Ġpep per
le ader
Ġst am
Ġsup rem
itud inal
ille m
ĠCass ie
Ġn ull
Ġkeep er
ĠB ella
Ġacqu itted
Ã¡n chez
Ġdep osed
ĠE cho
ĠPre c
Ġinter mitt
ĠL ucky
Ġsec urities
star red
Ġagree ing
B u
ĠC un
ĠAl to
ob y
H ell
Ġp inned
ĠJ h
Ġreview ing
195 6
ĠTr istan
Ġaccess ories
Ġus eless
Ġconc eded
Ġaltern atives
Ġcondition ing
ĠT up
ĠT omb
ĠD ome
Ġinc on
Ġprest ige
Ġveget able
Ġwind ing
Ġdeliber ate
ul o
ĠOs borne
fa q
t re
Ph one
ĠAnim als
Ġhor rible
ĠSar aj
Ġconcur rently
195 9
ĠInter mediate
ĠSchw artz
Ġrac ist
ut ter
ĠÎ ²
ĠMy stery
ĠNich ols
Ġprot ector
an ol
adu ct
ĠMartine z
ĠCons umer
Ġimp ose
Ġtrans plant
Ġp onds
Ġla ure
Ġse af
ĠFlow ers
ron ym
Ġseed ed
Ġm ating
ĠJ ared
Ġdrif ted
gy z
Ġwh ist
ĠWa it
S pec
ĠA u
ched elic
Un ivers
direct or
ĠTipper ary
Ġne at
Ġ12 1
Ġbi om
ĠM ines
ric o
onom y
Ġcombust ion
ĠC umm
ĠSome one
ĠJac qu
Ġcommemor ated
Ġatt ested
f air
ad in
ĠR iga
ĠW ere
Ġcontain ers
c ool
ĠSw ord
gr ims
W al
Ġres ent
Ġmeaning ful
Ġsolo ist
Ġsk irt
ĠP aw
ĠCh atham
Ġkn ights
Ġsuppl ier
ĠBud get
ĠEmer itus
ific ates
id ium
Ġincl ined
Ġpolynom ial
Ġsym ph
Ġch op
Col umb
ĠP ey
tend er
Ġaff inity
U D
ĠLen in
Ġrestruct uring
ĠSt art
Ġper ce
ily n
Ġpre fect
ĠAd vert
ĠTal ent
Ġnarr ated
ĠWilm ington
Ġmit ochond
ĠN es
Ġrev ive
Ġtrump et
g arde
ĠAnd es
Ġrap ed
Ġvent ures
Ġtorped oes
ĠB ienn
ĠScandin avian
ĠD ell
um atic
aine es
Ġ `
ik os
ĠClass ics
ib u
Ġmilit ant
P ad
ĠY o
Ġgener ators
E p
Ġinstall ment
ĠTraff ic
ĠSol o
ĠAtt ack
de veloped
ĠNev ille
Ġvend ors
Ġo g
Ġev id
Ġl ust
bern atorial
n m
ĠW ess
Ġship yard
Ġpro fic
ĠD one
ĠSt ur
Ġher d
ĠV ie
spec ial
ĠW ad
ĠImm igration
ĠBab a
rews bury
iv ka
Ġch ick
Ch ina
qu ist
gr at
Ġprem ise
ĠIS IL
ib o
Ġnurs ery
Ġsam pling
M il
Ġh ards
ĠR E
ist ice
Ġday light
Ä± r
u ire
urn al
Ġtravel ers
rific ation
ĠSt ring
ĠV og
Ġconduct s
ĠP oin
ĠG E
ĠR ookie
ou m
ĠT R
f le
ĠS Ã¼
Ġinv ites
Ġhes itated
ĠDocument ary
ĠG ale
j as
ĠK S
ĠPart s
ĠDon ovan
ĠLo op
! âĢĻ
Ġbuy ers
ĠNurs ing
Ġdist racted
ĠInd y
ĠBur k
Ġmelod ic
j et
ĠRh in
orn ings
Ġclos et
ĠD O
ĠO K
Ġexplo it
Ġb ilateral
à¤ °
ĠBarb ados
ĠS Ã¡nchez
ĠS unny
Ġscr atch
ĠW erner
L u
ĠCooper ation
ĠL oth
u ins
ĠBirth day
e er
it ored
are ttes
Ġsocial ism
Ġsex y
ĠFe ature
ĠRem ember
ĠS ail
Ġout post
W alk
ĠN I
Ġde ed
g os
ut ant
Ġimpact ed
Ġsustain ability
Ġexclus ion
Ġf ianc
Ġwood ed
Ġs addle
Ed ward
ĠLak sh
ĠHe idelberg
Ġobject ions
Ġanthrop ology
Ġg em
ĠJ ensen
ĠE rd
l op
Ġperipher al
ĠL atter
ĠAnth rop
t ake
Ġconsider ations
ĠB ishops
ĠT rial
Ġrev olves
ĠHubb ard
Ġr ipped
Ġmed all
ĠLy dia
in ting
Ġshe er
Ġexp ose
ĠKnow ledge
c orn
Ġsp anned
ĠReg ent
p el
uc es
ĠBr at
Ġelong ated
Ġcreat ors
Ġpot atoes
Ã¡ k
Ġamb ush
ĠH ands
ĠD ash
Ġcomp ose
Ġorgan ist
qu it
ĠD odd
Ġan al
ap ter
Ġrefurb ished
Ġcat cher
Ġd are
ĠSt o
idel ity
ĠF O
Austral ian
ĠTheres a
ĠÂ «
ins pired
ĠÎ ¼
Ġintern ally
in ational
ĠT ot
ĠLig ue
Ġcons ume
Ġcur iosity
ĠMov ing
B attle
H ead
ĠL au
Ġguard ed
ĠFig ure
Ġmaj ors
Ġinsign ia
Ġout reach
ĠPriv y
ĠSchwar z
ĠEv idence
Ġdu ct
ĠMer chant
ĠWrit er
ĠM ental
Ġro oted
Ġdig its
ĠF oss
Ġrhythm ic
um ption
Ġar ising
ov ian
ĠPe oples
ac as
ok s
Ġacc using
Ã« l
ĠMiddle ton
M as
ĠSt anton
ĠR uf
ĠSat ellite
Ġ17 70
Ġsp inal
ĠWol ves
Ġbe e
Ġam mon
do ors
ĠMand arin
ĠS low
Ġdon ors
Ġclin ics
Ġshare holder
ĠC ir
ĠEsp a
Ġdes erve
Ġmel odies
ĠK ier
ĠW inner
Ġar th
Ġrem ed
ĠPil ot
m berg
Ġref lex
and em
ĠK appa
Î ³
hig hest
ĠW ich
S ub
Ġpol ished
Ġmir rors
Âł a
ĠChrys ler
ĠRoman esque
ĠWh atever
Ġfor fe
ĠUA E
ĠMe ga
ĠB acon
inet ic
Ġannex ation
ĠPeter borough
Ġamount ed
m oon
ĠAl umni
ĠP eck
p ets
im ated
19 55
Ġh ipp
Ġpr isons
S ports
Ġsear ches
f al
ĠF ury
ĠClub s
Ġwick ed
ĠTh Ã©
ours es
Ġorch id
ĠWend y
ion a
Ġdoct r
col leg
Ġovers ight
Ġf ug
b ey
Ġp H
ĠWil kinson
ĠWhe at
Ġmagistr ate
ĠN J
ar ate
Ġse ab
Ġprosp ects
k t
Ġpre acher
ĠM ash
ut z
Ġa irst
ĠN aj
y st
Ġor thodox
ald e
pt s
ĠUn ic
Ġfamous ly
ĠSecret ariat
ĠB io
inn ey
ĠWW F
Ġr ains
Ġbund le
X T
ĠC ounter
ĠT art
Ġpol ling
ĠMay er
Ġhand les
Ġsyn th
w r
Ġtrol ley
Ġwhere ver
ty m
å ħ
Ġcr acked
St ars
lect ic
ĠTr an
r idae
Ġre intro
ad en
ĠF uk
Ġphilosop hers
f an
v ic
ro be
ĠBelarus ian
Ġlog s
Ġansw ering
ĠSh rewsbury
ay ne
ĠH ole
Ġsidew alk
ĠC age
Ġ178 8
Ġinst ability
Ġimp osing
pic uous
uch a
ĠGu ill
Ġdel ivers
Ġfif teenth
pt ic
ĠQu ant
ĠBr une
arn e
ĠB ia
Ġanx ious
Ġty ing
ĠA ug
th ren
ĠCh iang
- ,
I d
ĠDomin ion
ĠPied mont
y am
Ġprotect s
L ost
Ġdisc retion
Ġcontract ors
Ġrepublic an
ĠP ing
Ġboy cott
ĠG wen
Ġten ant
Ġgrad ient
Ġa ston
ĠOpen ing
V R
f ixed
with out
ĠL ights
Ġcom r
ĠR aleigh
ĠAl ma
Ġconven ed
ign ment
Ġh arn
art ments
Ġsuscept ible
Ã¡ il
Ġmagn ificent
ĠSee ing
ĠXV I
ie ft
r h
ĠP ug
Ãº s
Oper ation
ves ter
ĠMarse ille
. ".
c zy
ĠD ah
Ġdisc arded
Ġprop het
Ġpet rol
ic ates
S on
en k
Ġplay able
Ġcan als
el ope
ĠThe od
ĠL ibr
ĠSind h
ĠMartÃŃ nez
b ud
er ion
ĠN ur
Ġcrit ique
Ġpl ag
Ġ12 6
Ġarch ipelago
Ġpres eason
ĠF ind
Ġdefin ite
fer ences
ĠGuerr ero
ar oo
Ġdis band
Ġselect ions
Ġar rows
de acon
Ġmac ro
Ġp ist
ĠAm bro
ĠKey s
ĠP K
Ġwe aker
Ġende av
ĠPres ley
en y
op ening
Ġsc an
Ġtransport ing
Ġclean ed
em outh
ey e
ĠCh ick
Ġscen arios
Ġa ft
Ġmed ley
Ġillustr ate
Ġw orm
ĠExp osition
Ġab used
ĠGet ty
ĠBent ley
g old
ĠY az
Ġpul mon
ĠFern Ã¡ndez
Ital ian
Ġprec inct
ny der
he le
ĠMark s
Ġsemin ars
ĠB ibli
Ġbl inked
Ġmon t
less ness
ĠHu bert
ly ss
c ies
ĠB B
iv ism
Ġf ost
Ġperpet r
Ġm antle
ĠQu incy
struct ed
Ġp umps
Ġ23 0
ĠProt ocol
Ġprop ose
em er
ow e
P ower
Ġdisagre ement
Enter tainment
L i
oss ip
Ġorn amental
ĠP P
J es
atin ate
ĠT ick
ĠAt ari
Ġa per
ĠH umb
ig u
P ost
Ġproblem atic
Ġg aps
art hen
Bl ood
ad ena
Ġbas eman
Ġencour agement
ĠF ulton
Ġcarri ages
ĠJud icial
ĠNich olson
ĠP arr
aus ole
Ġrem aster
Ġinter conn
Ġfam ine
ĠOld ham
Ġprotoc ols
ĠZ a
19 18
as u
z t
Ġrespond ing
Ġhydro electric
ĠPas o
Ġ2 10
est ro
ĠRes ults
ĠWater ford
ĠSign al
ĠSunn i
ith a
in to
ĠEliz a
ĠClin ical
ĠJas per
j ah
Ġm ant
ten berg
yl ie
Ġprosper ous
Ġt apped
ign y
Ġdiffer ed
ĠH ap
ĠBre ton
ĠC rescent
und i
spons ored
Ġpen al
Ġm ang
ity a
Ġrespect s
Ġsteam er
Ġgymn astics
ĠStra uss
ph osph
sh ort
ony ms
Ġinte ger
UC N
ĠTe a
ĠKath leen
ĠE re
Ġemphas ize
ĠHo over
Ġloud ly
qu ired
ĠDaven port
S weet
pend icular
Ġsepar ates
B al
ĠCorpor ate
m or
iv orous
all o
ĠR uther
Ġmon itored
ĠÃī cole
oll s
Ġapplic ants
ĠA eron
Ġall oy
Ġm asonry
ĠAn s
t oday
ĠCharl ton
ĠFred die
Ġv isc
Ġb ury
ĠC rafts
Ġfor ged
Ġdr ains
ĠEle ven
is o
Ġdest ined
Ġout rage
form s
Ġorganiz ers
ult ies
y re
ĠB Y
ĠRw anda
Ġtall er
Ġvern acular
ĠP ure
ĠAn j
ĠH K
Ġwe ights
ĠBerg er
ĠKens ington
ĠSe ah
Ġer otic
I X
Ġde leted
Ġprosp ective
Ġremix es
Ġmetabol ism
ĠS arg
Ġn uns
Ġrel ocation
-- --
g t
ĠA mer
ĠAct ive
Ġilleg itimate
ald o
ĠDayton a
ĠSylv ia
ĠL ublin
ĠGre co
omet ry
h oe
Ġar ises
lu ent
um my
ĠM ouse
ob acter
ĠCol ise
Ġsoon er
Ġpur ported
ĠOver se
ĠR ak
ĠR aff
ĠDe gree
Ġinf ants
re lease
ĠWe in
a eda
c overed
ind i
ĠSp it
Ġ12 7
Ġappe aling
ochem istry
Ġgu bernatorial
ĠPer fect
Ġsm iles
ĠF eld
ĠArch ibald
Ġattorney s
op ic
ĠD ug
ĠFor ward
ĠPaul ine
ĠC ain
Ġdeterm in
Ġb od
ing ed
ĠHerc ules
Ġcomp ressed
ĠFore ver
Ġfertil ity
). "
Ġexception ally
Ġupgr ades
W ater
Ġstab bed
Ġsucc umb
ri ents
ĠG ilm
Ġs ire
ac et
Ġamb ition
Ġpl aza
Ġmor ality
R om
ĠAm Ã©
ĠTe aching
Ġcapital ism
ĠAv on
h ang
ĠZh ong
Âł âĢĶ
ĠNapole onic
ĠVish nu
Ġdens ely
Ġdictators hip
Se a
b id
ay o
up e
uc c
ĠPa olo
ĠUzbek istan
P re
Ġar rog
Ġp oker
f ork
ĠS ave
ĠAnt iqu
Ġc roc
ĠD erry
ĠSun shine
Ġsat ire
ĠShel ley
ĠAven gers
Ġcost a
Ġraid ed
Ġasym met
Ġmon itors
Ġlatt ice
ĠBel mont
Ġawa iting
int osh
Ġalgebra ic
bl ood
Ġsens ory
Ġvolunt arily
Ġb a
ĠN W
ĠWe aver
Ġconsolid ation
ĠN T
ĠFair fax
Ġethnic ity
ĠSan ctuary
Ġback drop
ĠBah amas
N a
Ġpenn ed
ĠTow ers
board ing
Ġsec re
L atin
not es
ĠWarwick shire
Ġd ots
ur us
ĠSp ike
Ġkern el
ĠRod gers
Ġreg ent
Ġfl ashed
M other
Ġpres erves
Ġcor rection
Ġc avity
ĠLy ons
Ġ Ø§
Ġsimul cast
b rough
ĠEm m
ĠExper ience
ach im
Ġ12 4
ĠUl tra
Ġcon vex
ĠGroup s
ĠProvision al
Ġf umble
Ġh arp
Ġemotion ally
Ġw arl
Ġal gae
ĠExp o
ĠR s
ĠW ester
st rom
ĠPe el
ĠRam sey
ĠSt ing
ores cence
Ġassum ptions
as ian
ĠAn and
ĠDep uties
Ġin appropriate
Ġexplo ited
Â Ń
ĠMart ins
ĠA ry
Ġvan ished
ai res
Ġdest ructive
ĠSaraj evo
ĠT rem
Ġmel ting
ts ky
om be
s ocial
Ġg i
Ġcor onation
v ik
Ġblow ing
Ġstun ned
Ġneg atively
Ġant agonist
qu el
ĠSh arks
ret to
Var iety
Ġsett ler
fl oor
ĠMead ow
ĠHod g
n agar
ĠNY C
Ġse als
Ġa isle
ĠB T
Ġcann abis
Ġw ed
ĠSh ia
ĠM afia
Ġatt ribute
ĠComple te
ĠC over
con i
w atch
Ġad olesc
ĠM T
ough ton
ĠPet rov
ch arge
ĠCl ap
ĠBarn ey
Ġw ires
umb a
Ġtext book
ĠCommand ing
ĠToul ouse
Ġass erts
Ġpul p
.' "
g rown
Ġt ally
ĠPomer ania
ĠBel ize
m ajor
ĠH ub
ĠSi em
ise xual
Ġentr ances
ĠN guy
ĠCyr us
Ġdiagn ostic
out ed
H on
ĠSh ankar
Ġdisturb ance
Ġsyn onym
Ġbenef ited
Ġunm arried
Ġfusc ous
Ġf rown
ĠPurd ue
y es
oot er
Ġb amboo
ĠWorld s
as ped
Ġwater fall
ĠS ik
Ġdisgu ise
i ad
ĠYoung er
Ġs ins
ĠBoy le
ĠCorn ish
Ġprop ulsion
Ġc itation
Ġcalc ulation
ĠFu ji
ĠK ern
ĠEl ias
b ag
ĠF DA
ĠHi ros
Ġsh ining
ĠRun ning
ĠMal ik
Ġinit iate
ĠMat hew
Ġcup s
ĠR iz
Ġproc ure
ass a
Ġroad way
Ġfort unes
Ñ ĩ
Ġun beaten
Ġp end
Ġexp ulsion
Ġmid way
Ġburn s
el is
Ġn ons
Ġemb ark
19 49
ĠMet z
C ur
Ġh anged
Ġt ug
Ġm iser
ĠP au
Ġpresent ations
ä º
ĠMat th
Ġbirth s
ĠFe ather
195 4
op hy
Ġv ows
ĠV oy
n ov
Ġsur real
Ġinstrument ation
Comm un
ĠG PS
chen ko
Ġhal ft
d ev
A L
Ġ17 77
ĠNiss an
Ġd rap
Ġvill ains
Ġsh oved
ur an
ĠPlay ing
ĠC Ã³
ĠH ouses
Ġsan ct
empt ion
Ġbotan ical
ill an
ĠLeon ardo
Ġab ort
ĠCypri ot
Ġfour teenth
ara oh
Ġcont ention
", "
b ecause
ĠSpec ifically
ĠLu igi
ĠD ear
Cent ral
ĠAng us
Ġfacilit ated
Ġqual ifier
st reet
Ġamphib ious
n ard
Ġcompar isons
Ġvacc ine
op l
ĠAl icia
ĠAn ast
ĠRome o
ĠMcK in
ĠHar ley
Ġt ile
ĠI gor
Ġrece ip
hr er
ĠEd ison
Ġsimultane ous
ĠMÃ¼ ller
iv ial
Ġvis ually
Ġbow ed
K eep
Ġc eded
ĠSt ro
ĠAlex is
ĠProtest ants
liter ally
l ated
Ġpre aching
ĠUr b
Ġoverwhel med
Ġch oral
ĠAud i
ĠSn ake
ĠGold man
ĠLiber ia
Ġch asing
Ã©n Ã©
ap hys
land er
ĠSyn od
ĠChall enger
Ġcoinc ide
ol ish
ver n
if ully
ĠMal awi
ĠQu aker
Ġm elt
ĠVan essa
ĠS ung
Ġreal ization
Ġenc oding
ĠAristot le
Ġcylind rical
Âłk W
Ġselect ing
ĠC ats
ĠJu vent
ĠT actical
ĠC itation
ĠCP U
A cc
ĠP ang
Ġwh ales
ĠMor se
Ġparalle ls
Ġlon ely
ĠCand id
ĠRut gers
Ġsqu ir
Ch ild
ĠÃ ĺ
ĠWood y
v ill
Ġgl ut
ĠCy ber
Ġstro kes
est inal
ĠH Q
Ġgood bye
ĠRes ource
ĠHold ing
ĠP ens
Ġprob ation
ĠCon st
al iation
ĠCarl a
ĠC af
eb el
gor od
ĠGl am
bro ken
Ġelectrom agnetic
Ġrepl ies
Ġresemb led
ĠTe acher
Ġdiver ted
Ġin acc
s in
ĠDe velop
Ġmanip ulation
âĢĶ "
ĠS SR
Ġmort ars
che on
Ġgri ev
ĠH ild
Ġs ized
Ġcent imeters
Ġtermin ology
Ġl i
lect ions
Ġprocess ors
ĠConstitu ency
art y
ĠBr ab
ĠD ed
uff led
apur am
Ġne uros
Ġch or
Ġdisqual ified
m oor
Ġinc idence
Ne il
H ip
Ġ15 5
Emp ire
oper ated
Ġsax ophone
Ġl ounge
Ġindic ator
ĠN P
ĠNa omi
ĠAR IA
stra ÃŁe
Ġ14 5
raw l
Ġb itch
Ġcons cience
est ial
Ġlect ured
ĠE ur
Ġfant astic
Ġdecl ares
Ġc ents
anc hed
ir al
ink le
Ġcort ex
op ard
ĠD addy
ĠCl air
ĠMcL aren
Ġminim ize
ĠTuc son
Ġrem arried
Ġanat omy
ĠP ist
Ġnomine es
Ġt rench
Ġdis pro
Ġcourt esy
Ġp igs
Ġpar an
Ġmot ive
10 5
ĠTe atro
ers field
Ġbeg innings
Ġglow ing
Ġg erm
Ġle ap
ra e
Ġa usp
is man
ĠD aly
Ġex its
pol itical
Ġtrans verse
Ġdiam onds
Ġvis ions
ĠN om
Ġresear ched
Ġa z
ĠT ec
ĠW izard
angu ard
ac ements
ide a
ĠFred er
ĠAngel o
C ro
E st
ps ons
f s
ĠDarl ing
ĠF L
ĠLaur ie
ĠMur der
ĠHy per
Ġv intage
Ġground ed
Ġintend ing
g rowing
i q
ĠDon caster
ĠPul itzer
ĠS as
and um
ĠFarm ers
Ġrev ital
ortun ate
ĠLump ur
ĠPre par
colleg iate
. _
ill ic
Ġstr ang
Ġdeal ers
Ġcommission ers
Ġhe ats
Ġtax p
195 3
Ġundert aking
ĠIv ory
W all
Ġfr ig
Ġamb ient
N F
it on
and ar
Ġflu or
Ġurg ent
ĠG ow
ĠCo ordin
ĠN ure
ĠRom antic
ĠFam ous
Ġdef ects
Ġeven ings
ĠHall oween
ĠMult iple
ĠSal zburg
Ġrein force
ĠCrit ical
ĠDick inson
ed ience
ĠExpedition ary
Ġproject ing
ĠDyn amo
oc lass
de gree
Ġsil ly
Ġte legraph
Ġfor c
ĠBr idges
ĠMin t
Ġgreen house
ĠO ro
ĠL akers
ĠPet ro
D D
Ġprepar atory
ant ically
W W
Ġtreat ise
ĠMechan ical
Ġfright ened
s ource
es on
Ġd angers
ĠWat kins
po em
ĠTown send
ĠS ass
ĠMet eor
ĠChel tenham
Ġgr apes
ĠCons id
ĠF ont
ĠStras bourg
Ġth or
ĠPre vention
ast es
ĠSe vent
Ġbi ographical
ĠKyr gyz
Ġstation ary
ĠMan aging
S ex
Ġs iding
á» ĩ
m ot
os cop
ĠFI A
ĠR over
ĠUt recht
V er
ĠT ears
Ġconj ug
ĠO y
pro fessional
Ġden ial
Ġthreat en
Ġintend s
m ur
Ġv apor
P ers
Ġmur als
ĠMar ilyn
ĠDes mond
e gr
ĠKat rina
urs ion
ĠBea umont
ĠV oc
Ġincred ibly
N ame
Ġastron omical
Ġg el
Ġenvision ed
Ġdown ward
ĠK av
e very
å ®
ĠCitiz en
ĠCoff ee
ĠM oody
ĠStr ath
ĠA va
ind ust
Ġauthor ised
ĠTom as
ĠB oot
ĠPe er
ĠSh arma
ĠAr chie
ting u
ĠPan zer
ĠShut tle
Ġsed iments
e ze
old ing
Ġlibr arian
ĠKn ock
ĠHay den
nd e
Ġtrans cend
Ġav id
ĠN RL
Ġchronic les
Ġembarrass ed
ink led
ĠV od
Ġy oga
ik u
ĠM ask
oc ument
per ors
B T
Ġw ww
enge ance
Ġeld ers
Ġpal ms
ĠMilit ia
ĠMac c
Ġcann ons
Âłh p
Ġd itch
Ġemp irical
ĠCzechoslov ak
ly a
G T
M em
j ak
ĠS add
Ġden ote
Ġult ra
ĠPass er
Ġcur sed
ĠMcC orm
Ġglac ial
Ġdeterior ated
Ġw ield
Ġeconom ies
ĠDon etsk
Ġinv asive
Ġven om
Ġchlor ide
Ġsa fer
d et
Ġcomp elling
Ġimp air
all ah
ĠPot omac
Ġcount less
ĠTem per
ud ence
ot hed
ĠCup s
b irth
k ick
est ing
ĠSpe aking
M ain
ĠAn aly
ana o
Ġdisagre ed
E le
Ġvir uses
Ġlandmark s
tain ed
U I
ĠE M
Ġcont empt
Ġal lev
Ġaff irm
Ġmic ros
ĠChand ra
fund ed
ment ation
w u
Ġgl ared
ĠHill ary
10 4
ĠFort ress
ĠGu er
ÈĻ ti
id able
ĠPiet ro
Ġridic ulous
erg ic
ĠG aming
Ġcorrect ed
ĠRoc he
L eg
Un ion
ĠSem i
Ġdatab ases
Sec ond
ĠD oor
ĠGr ange
ĠTh orough
Ġaver ages
B aby
n at
Ġgen etics
w reck
it ives
ĠY oko
Ġmorph ology
ier a
Ġens ued
ĠClin ic
et to
ĠG est
Ġdesk top
g ram
z hen
ĠT ests
Ġassault ed
Æ °
ih ad
sign up
ĠA V
ag ain
ĠAm ph
ĠI ris
Ġfl ick
ĠVeg a
Ġprev ailing
") ;
Ġbord ering
Ġantiqu ity
ĠAre as
Ġmus cular
Ġfin s
Ġchart ing
Âł 4
Ġun ification
Ġtransl ate
ĠG erry
ab outs
ren ches
ph alt
Ġcer amics
L y
ĠI on
ĠJ ian
Ġdes erved
ĠFlow er
Ġinvestig ator
Ġcategor ized
ĠM ama
Be aut
ĠM ek
ĠThe rap
ĠK op
ĠSe al
ops y
D is
st re
Ġperiod ically
Ġas cent
ĠRap hael
r ador
st ars
qu isition
Ġsym phony
in en
Ġtext books
Ġoversee ing
c ulture
ĠLe ah
Ġknight ed
S ing
ist e
ect ory
Ġ13 2
Ġtherape utic
ign e
Ġmult imedia
back ed
f ires
ĠR out
Ġlan tern
ĠCale b
ĠL ark
ge v
Ġgr ains
ĠFl ores
ĠCharg ers
Ġst ellar
Ġk et
Ġro y
c ad
ĠM ou
ul as
Ġsyll able
ĠConf uc
at ine
b earing
Ġ æ
ĠR ole
ĠCare er
Ġmetaph or
Ġan ts
R am
z b
Ġ q
Ġover r
Ġn iche
ĠD unk
Ġkick s
ine as
rick en
T re
au k
ĠZ ah
Ġuncon stitutional
ĠB onnie
Ġ16 60
R eal
ĠFin ch
gh a
ĠBow en
ĠLock heed
ĠO R
Ġreact ed
ĠNikol ai
ĠT iff
Ġprev ailed
ĠD ogs
part icularly
Ġt ech
ĠG arrison
ĠV u
Ġjud gement
ot us
Ġv om
Ã©d Ã©
ograp hed
ĠHistor ian
m atch
Ð ¹
19 14
ling er
19 48
umn us
ĠLegend s
Ġn uts
lu enced
ĠSold iers
Ġcontrad ict
Ġterr ace
Ġdis gr
Ġvert ices
ĠMcC oy
Ġspect ral
Ġterm ination
ĠMo han
Ġhear ings
ĠPr ayer
Ġcritic isms
Ġausp ices
pl anes
ag ements
Ġpack s
ĠVers ailles
Ġamalgam ated
pre viously
ĠZ oe
Ġfun k
ĠGal icia
ast ically
Ġbattles hip
M ount
z u
Ġb ou
Ġl ime
ld on
Ġkn ot
St and
Ġadvoc ating
Ġelect rified
Ġquarter ly
Ġ178 7
ĠH ide
ĠD ro
ĠEug en
Ġliver y
ĠF rey
ur ations
ĠMac K
des igned
Ġsupers eded
x x
ĠPol o
em ail
ĠJ ays
Ġsever ity
Ġb illed
ĠA ure
ĠGall agher
ĠDam on
Ġexp osing
Ġlo ops
Ġhun ted
ĠHaz el
ĠEd g
ĠSt rip
ĠTr uck
4 50
Ġcont amination
Ġar tery
Ġdep osition
ĠTri o
Ġg a
Ġse ism
ĠS ino
Ġun ite
ĠPeg gy
ĠZ heng
ĠLa o
ĠHertford shire
Ġlobby ing
Ġn ude
Ġe go
Ġbrown ish
ige on
Ġs ul
b tn
Ġe uro
ĠLe vin
ĠVir gil
Ġbreat hed
c ars
Ġret aliation
Ġcan yon
Ġhorm one
Ġim minent
Ġl amb
ĠLib yan
ens ation
Ġcommun ists
ĠIm am
St ud
W ait
ĠK ilm
Ġcompens ate
Ġreason ably
ĠQ in
Ġg rit
Ġcons erved
Ġbad minton
Ġbow led
ed in
ĠO uter
ĠN ils
Ġterm inals
ĠRow ing
Ġhalft ime
c ode
ary n
Ġsalv ation
Ġ178 4
ĠExpl orer
ay n
ĠMcC ain
ĠL od
ĠJ aff
ĠE aton
Ġrel ocate
Ġcommemor ative
Ġnoble man
Ġpreval ence
19 41
ĠB ots
Ġcon glomer
Ġbu yer
Ġmass ac
ĠW TA
Ġstrike outs
ĠG if
E nt
ĠTro op
Ġinf rared
Ġster eo
Ġh ut
aus es
ĠL ille
Ġhar v
Ġlim b
Ġrun off
Ġsax ophon
Ġhurd les
rop s
ĠU ll
ff er
Ġpot assium
Ġnot eworthy
Somet hing
han i
ĠFilm ing
ĠP OW
Ġdress es
ab an
ĠHudd ersfield
ĠW ond
ĠH og
ĠJ ury
Ġgener ates
Ġrhet oric
ĠGr ad
Tur k
ĠMy s
Ġfil ters
Ġbo ilers
Ġh obby
Ġr up
ĠGi ul
Ġc auc
at en
ĠB ingham
ĠR hythm
if erous
ew a
Ġrac er
ĠLam ar
ĠC ody
ĠGo als
enz o
ĠC rete
ol m
ĠJ ong
Ã¤ t
Ġreson ance
" (
Ġrabb it
ĠLess er
ĠColise um
ĠG uth
Ġ6 50
Ġdisc o
Ġpopular ized
ĠP tole
Ġwh ip
co e
Ġencl osure
pl ain
ross ing
ĠGuang zhou
ag in
Ġby e
Ġefficient ly
ĠN er
Ġ17 78
ĠMalt ese
ĠMaurit ius
al ist
Ġdepend ence
Ġgate way
ys is
Ġcataly st
am en
ĠY uri
F e
ĠS nyder
C ola
ĠCompan ion
Ġal ias
195 2
Ġcalc ulate
Ġp awn
i om
Ġto e
and el
ren s
Ġsupermark et
c up
rop shire
Ġconsist ency
ĠProgram s
Ġaccident al
ĠApp arently
Ġsimpl icity
ĠStrateg y
ĠW att
Ar ts
Ġreg gae
Ġland owner
ĠStrat ford
ĠEdu ardo
Ġacc reditation
ĠA verage
cher y
ĠNorth am
Ġprefer ences
Ġassass in
ĠN eum
Ġwat ts
ĠBarr acks
Ġrabb i
he rence
ĠSh ap
Ġparad ox
ĠBo er
ocyt es
ĠD ÃŃ
ĠBalk ans
Ġ ugly
Ġsupplement ed
Ġforth coming
Ġdisgu ised
B as
ĠGo ing
ĠAbb ot
ĠR iders
Ġrespond s
Ġmask s
F il
ĠE F
re x
ĠD iss
Ġstr anded
Ġst umbled
ĠSup ply
Ġanaly sts
ĠA e
ĠBasil ica
ĠE R
ĠRes ear
umb les
Atlant ic
me z
Ġpop ulous
Ġtur f
Ġabs urd
ĠH arl
Ġpractition er
Ġsp herical
19 46
urd ays
ĠN ath
Ġin ert
ec d
Ġland owners
ĠBay ern
Ġform ulated
Ġland fall
ĠItal ia
Ġric hest
Ġassist ants
Ġtheolog ian
ĠAd el
ĠS asha
Ġtr action
Ba hn
ĠS iv
z ek
ĠFrancisc an
man i
Ġsole mn
Ġsubsid iaries
n ant
ĠCarn ival
Ġwarn s
H ard
ĠSerge i
Ġillumin ated
ĠR ai
Ġs ou
Ġin duce
ĠCol chester
ĠP ry
ĠSh ang
ĠTim or
Ġfield ed
cont inent
ĠNeigh bor
Ġscrut iny
ĠF ra
ĠAl z
v ig
ĠCh ir
Ġuns ure
ĠFac ility
r ates
Ġf ri
ĠH icks
ĠL oyal
Ġend less
Ġind ict
f ill
b elt
ung s
ipp on
Ġpro claim
ond iss
ti enne
ĠCross ing
ject s
ĠNor a
ĠNo ct
ienn e
ĠPri ory
ĠKen yan
ĠLe ading
ĠSp a
ĠAl ley
Ġforest ry
Ġenerget ic
Ġr ugged
ĠCommun ists
Ġb ic
Ġimm ortal
ĠW itness
ell an
K n
a vers
ĠPal ermo
l ach
Ġf encing
Ġb oring
ĠCom par
Ġactress es
Ġproceed ing
ro ots
ĠB ly
Ġv ectors
Ġsel dom
ĠN inth
ĠC arrier
ĠCald well
o ct
ĠV arg
ĠMin h
Ġax le
Ġinterven e
c reat
rit t
ĠW ex
ĠG raz
Ġob it
ĠRich ie
Ġh ides
i ak
ĠCont ract
Ġcyl inders
S ah
ĠT av
Ġimpl icated
dr ums
Ġsky sc
ĠOri oles
m ma
ĠO u
ĠVer onica
Ġ(" "
Ġlower ing
inn a
! !
ĠD aisy
Ġhost ility
ĠMonth ly
ic her
S ix
ĠChe y
rote in
isk y
ĠPros ecut
ĠE asy
Ġv ain
Ġgro aned
ĠBent on
ĠF rog
Ġbe ard
ĠBar cl
Ġanaly ze
Ġover he
Ġinv ading
ĠAm trak
ĠSer ena
ĠLuc a
Ġdepr ived
ĠM ansion
Ġpract ised
co al
Ġden oted
195 1
stit utes
neg ative
ĠN ish
b uck
os ures
Ġr ack
Ġrepe ating
spec ially
19 00
ĠCon stance
ĠSe as
ĠUSA F
law s
ĠD z
ĠDar ius
Ġnut rients
Ġy eah
Ġro s
iqu it
T urn
w ang
ell ate
Ġm apped
ox y
le tal
Ġsup erc
ĠSim one
ĠCart oon
rac ellular
ĠK een
ĠCle an
ĠN ok
ĠSc heme
ĠGreen wood
U TC
et hyl
ĠN ept
ĠC es
Ġtable ts
Ġl ar
19 36
ential s
in z
E U
aw ar
ĠCorn elius
in ho
Ġmix tape
Ġcon grat
Ġbest s
arg er
Ġbrack ets
tr acks
Ġprof iles
Ġlapt op
Ġdel ta
O ber
Ġstr ains
D onnell
ĠK auf
Ġbomb ed
Ġtransp arency
ĠAccording ly
An th
ĠMes a
at io
ĠK ro
ĠGold berg
doctor al
Ġlac rosse
her st
ĠEv olution
Ġorb its
ĠM Ã¡
A le
Ġsh attered
ĠMar ino
Ġhel pless
Ġthem ed
Ġune ven
Ġcaf Ã©
Ġpers ecut
ĠFo ley
support faq
ĠM ent
Ġtr ash
Ġnotice able
ĠE up
ip ers
ĠLe vant
Ġb izarre
ĠB az
ĠGe elong
Ġcand y
Ġearthqu akes
ĠA ck
ĠEs per
os ium
Âł 5
Ġmid field
ĠFort y
C e
Ġcaptain s
Ġvig il
ĠP sal
Ġend urance
t us
ĠL ED
ĠRecon struction
R ead
ĠS ke
ĠV est
Ġrend ition
Ã©t Ã©
Ġunemploy ed
Ġmot ives
ĠPunjab i
ĠF unk
angu ages
gar h
Ġreconc iliation
ly s
19 47
ĠInit ial
Ġpl ung
Ġcaps ule
Ġinf licted
ĠEd dy
Ġsen ate
Ġs orrow
ĠW hip
ak ar
Ġcanc el
Ġtow ed
Ġgl oves
ĠMon itor
Ġtransport s
Ġroyal ty
ĠYork er
ĠCrim son
ĠP omp
up a
Ġinv iting
ĠEl iot
Ġtight ened
Ġin ad
Ġlif ts
Ġh ay
ĠT F
ik an
ĠSk inner
Te am
Ġgl am
Ġmort al
k as
ĠV olk
Ġimpl icit
Ġhur ry
ĠRen o
os ia
Ġdomin ation
ĠWh ig
Ã³ s
Ġpit ches
ĠAmbro se
ter ror
Ġretail er
Ġover ly
Â »
ĠTaj ik
Ġcontin ents
ĠUS L
ĠNe u
h ov
Ġcare taker
aw ak
leg ged
ĠSec urities
Ġdisin tegr
ĠSat urdays
Ġdislik ed
pr iv
f lu
ĠShe ila
Ġtop s
ĠJes uits
Ġfare well
ill ac
he alth
Ġboard ed
Ġhaun ted
Ġnegoti ating
ĠTy ne
ĠMathemat ical
ĠAppalach ian
i Ã¨re
inal d
ĠCal iph
ĠNe olithic
em ar
Ġhand ing
umb ria
un ted
Ġdep ended
ĠMart ÃŃn
hu i
mo il
J on
ĠA ra
Ġrest s
Ġprov oked
F in
Ġ178 1
ĠHindu ism
ik ov
Hung ary
Ġlif es
Ġd ump
ĠInc re
ĠH ash
ĠCol t
Ġ17 50
iew icz
ĠSum atra
Ġoverl ooked
ĠS ector
Ġnewsc ast
Ġman kind
Ġcease fire
ĠVic ente
Ġclar inet
Ġex tingu
Ġsen iors
US S
Ġshr ubs
pp o
Ġsp ouse
Ġac ronym
Ġag gress
Ġp anch
Ġdown stairs
Ġ12 9
Ġweight ed
ĠReview s
ĠPa ige
Mus lim
Ġur ine
ĠSh ropshire
h ana
ĠPres idents
Ġprop osition
Ġqual ifiers
OR D
ĠBour bon
Ġwholes ale
ĠG is
Ġsh irts
Ġcert ificates
Ġ( +
Ġfl ip
ĠIsland ers
keep ers
Ġdesp air
Ġre elected
ĠT eddy
Ġenthus iast
Ġamb itions
ĠHumb oldt
H appy
g eme
ĠKit ty
Ġinv ade
Ġdis asters
og ly
Ġpaper back
Ġconver ts
Broad way
ĠLag una
ĠMil k
ĠCour thouse
Ġcool er
amm u
ass er
rop y
Ġattack ers
ou fl
ĠCons olid
ĠMcLe an
a q
yn a
rid ges
ĠB ij
Ġhe el
and ah
Ġres et
Ġcand le
ĠConfeder acy
Ġdepict ions
un ing
ĠZ el
ĠWesley an
Ġmir acle
Ġsc arc
Ġhair y
Ġacqu is
C atholic
ĠD ani
na ÅĦ
ig l
Ġblow s
Ġexpect ation
Ġsacrif ices
am us
ĠC oca
ĠG arn
Ġad hes
hel le
ĠV end
ĠFormer ly
ĠBab ylon
Ġte leg
Ġinter ventions
19 44
ac ock
ul ously
ĠT O
ĠAm os
ay am
em is
Ġflatten ed
ĠShel by
Ġtr ams
19 42
most ly
Ġlaws uits
ĠWich ita
ĠM ast
ay y
Ġpot ato
Ġshout ing
ĠK ov
ĠWe ekend
ĠC J
ĠL augh
Î ¬
w art
Ġwar mer
ĠPant her
ĠTa ft
P lan
ĠBlack s
Ġs ights
ĠM eck
ĠCh il
ĠScar let
Ġn Ã©e
Ġmechan ic
ĠCh un
Ġswim mers
ĠMongol ian
ĠM ok
ĠP ush
bre aker
Ġnick el
ĠIn ters
Ġd ow
ĠB anner
Ġcollabor ating
ĠM off
ĠM LA
Ġcompet ent
Ġl ining
ĠT au
ĠSam sung
m ass
iz oph
Ġ Ã©
ĠM eng
ĠSw ind
Ġele phants
ĠSch ul
ĠCaled onia
ĠRoll s
ĠKram er
ĠCon an
ĠM ild
ĠBroad cast
ĠBeat rice
g ger
Ġfur long
ĠKl aus
ĠCh or
ĠClass ification
Ġflu ent
h ua
Ġl izard
ich uan
Ġpre fers
ĠSt ap
Ġcritic izing
id is
Ġcollabor ate
Ã¥ rd
ĠHer z
P seud
Ġgluc ose
ĠS ie
ĠL DS
Ġeng agements
ĠOrd nance
F ive
ĠRos em
v ette
ĠR O
ĠCar ly
ĠH och
ĠTal mud
Ġ178 2
ĠDest roy
R el
ĠG av
ph ys
ĠFood s
ĠMicha els
Ġst agg
C le
t urn
ĠM ode
l und
p ron
od en
ĠC indy
ĠL ys
Ġse ap
ĠLeg acy
Ġemphas izes
ĠB ain
19 37
Ġanti que
Ġpreced ent
Ġbuff er
Ġle thal
ĠOr b
T ech
ĠK ish
Ġrem ixed
St reet
Ġend ured
ĠN L
ĠApp lic
Ġabb ot
D et
Ġres olutions
Ġconson ant
h ous
ĠAltern atively
ĠV ert
Ġlend ing
ĠBro ken
Ġbook ed
iy e
ĠHor ror
ĠRom ney
Ġd umb
ĠS ears
ĠSc orp
quer que
Ġradio active
ĠBl essed
ĠD ate
th am
Ġcomp iling
oty pic
Ġexplan ations
ĠExper imental
Ġa u
19 38
ode on
Ġviol ating
Ġstim ulus
Ġre lying
Ġexempt ion
ĠAle j
Ġbapt ized
ĠP att
ĠL ara
og er
Ġdef iciency
em eter
ad j
Ġcooper ate
ol ate
Ġcoeff icient
ĠMarri age
ĠM ow
ĠDes igned
al u
Ġdirector ial
Ġpredomin ant
Ġwe aving
Ġens l
ĠJ oin
Ġtro ph
ĠLab rador
Ġpar ole
ĠWel ch
. ;
ric on
ĠNe uro
ĠSal le
Ġreject s
ĠPros pect
Ġth ief
AR T
ĠF ir
Ġtr ailed
Ġic ons
Y ear
Ġst aple
Ġsc anned
Ġpiv otal
unn ers
Ġg ent
al er
ar ist
Ġorchest ras
m ap
ing o
Ï Į
M ex
ĠMem ory
D ist
Ġl iaison
ĠPalest inians
Ġrem ind
ĠDeb orah
ĠEmploy ment
Ġper taining
Ġtransform ing
ĠAd ler
w at
ĠM aker
Ġdis reg
rel igious
ĠGymn asium
Ġse p
ĠVolks wagen
Ġ ub
Ġdis rupted
en aries
ign ant
Ġcl ues
Ġexc er
Ġplag ued
es ian
Par is
Ġ17 60
Ġhed ge
Ġpred iction
ĠApp ro
Ġcl ut
E arth
Ġb our
Ġtr unc
Ġprogram med
Ġcolon ization
ĠL C
ĠL L
ĠW K
Ġm un
ĠSh ay
ĠMount ed
Ġsaf egu
Ġ }
Ġsp ines
cl ing
ĠPlay house
Ġannoy ed
Ã ¹
ĠSar as
ĠE h
ĠGo es
ĠPas adena
Ġstr and
Ġpill ar
Ġshield s
o os
s uper
ĠSpani ards
Ġimpro per
i idae
ĠK art
D B
ev ich
Ġbra very
ĠCÃ³ rd
f ram
ĠBeck er
work ed
ĠHans on
ĠContin uing
ĠSc ore
on ium
ĠT os
ĠS amb
V O
ĠPet roleum
ang les
Ġpers isted
O x
f re
Ġtr aps
ĠArt istic
' '
ĠAl onso
Ġfac ulties
Ġlands lide
Ġcr ank
ĠBuild ings
t ri
at able
Ġr hythms
T en
Ġ16 5
Ġtem po
13 5
ĠArmen ians
Ġunders ide
Ġnot ified
Ġfore nsic
ran es
ĠQur an
Ġenthusi asts
Ġdr ank
Ġmount s
emeter ies
ĠBrit ann
Ġrout inely
d c
Ġchar ming
Ġbi ot
Ġ* *
Ġattend ees
L ight
Ġshoot out
Ġfooth ills
Ġlong itude
' "
ĠB ourn
Ġ13 3
L ee
z Ã³w
ĠT anner
ĠPubl ishers
Ġmin er
Ġ ze
ĠThorough bred
nd ra
Ġanalog ous
ic ides
ĠA min
Âł nm
don ald
Ġclo ak
p unk
ĠFly ers
Ġspl its
Ġtr uss
Ġbl unt
ung al
ĠL T
Ġcur led
Ġarchae ologist
Ġdi as
Ġdiscip le
ĠN ir
av ior
ĠTur kmen
ad r
G reg
Ġn ip
Ġphotograp hers
on ite
ĠLoss es
ĠG ong
T alk
Ġs ultan
ĠS ark
ĠW ight
Ġsub gen
ĠCrime an
gener ally
Ġelect ors
ĠV iz
Ġimp aired
ĠLut on
il us
Ġper t
ĠGu inness
Ġincons istent
ĠB Ã¼
Ġbomb ings
Ġaug mented
ĠS essions
ĠU M
Ġinc ub
we b
Ġ14 4
Ã§ Ã£o
ĠB ann
ount y
t ree
E X
ĠBurn ett
Ġs ided
Ġadul thood
ets u
Ġnas al
ĠPoz naÅĦ
ĠJ R
Ġbr acket
che v
ĠPan el
ĠOverse as
ĠG iro
ĠV ot
ĠMa ud
ĠD ill
ĠK ee
act ing
ĠAz tec
Ġinver te
ĠPl ato
ĠFlor a
ĠUnivers idad
ĠC app
ĠLeices tershire
Ġretrie ved
Ġsc are
Ġhier arch
ĠAssess ment
F P
Ġst unning
ĠSe ville
ĠCan ary
Ġcompar atively
Ġcad et
R os
ĠS out
ĠK us
Ġmus k
Ġsuperior ity
Ġpump ing
Ġoxid ation
Ġecosystem s
ĠCol ling
Ġimp ly
Ġcommemor ating
ĠLa uder
Ġbuild ers
ĠBor g
Ġp ie
Ġbook let
O pen
Ġ5 50
ĠPr at
pro duct
ĠAer ospace
"/ "
ĠRestaur ant
ausole um
Ġm as
ĠCor ridor
G host
F B
rif ying
Ġd agger
Ġsever ed
ĠKap oor
ĠR M
Ġund rafted
ĠRep orter
Ġcoast s
Ġseiz ure
ĠP ax
ĠOl ga
sch ild
Ġdiv ides
]] ,
Ġre wards
ĠM AC
10 2
Ġcere bral
19 19
ĠCyr il
ĠL ois
Ġpro clamation
Ġdivision al
ĠWolver hampton
Ġspont aneous
pr ints
le hem
ĠAt kinson
Ġpers pectives
Ġfunction ed
ĠMar j
ĠRuther ford
emb les
Ġgrow led
ĠE thel
q ing
ĠPar a
id on
à¯ į
Ġinfect ious
Ġremn ant
c as
ors k
Ġreg isters
Ġineff ective
ĠAb e
ĠLoc ke
Ġtor ch
t land
ad der
ĠBurg ess
ĠGr ig
ĠW H
Ġt ails
Ġsc enery
ro qu
Ġaristocr atic
ik en
offic ially
u il
ĠR oses
uff y
ĠTr ains
Ġfire place
Ġsolic itor
ĠCl erk
Ġcollabor ators
Ġrandom ly
emb rance
Ġj ets
Ġcott ages
ink el
S en
ĠP f
ĠPass ion
commun ication
am ma
Ġter rified
Ġmin ors
ĠCon v
ĠÅ ŀ
Ġneuro log
vent ure
get t
ĠAlb u
Ġoff ences
Ġhes it
ĠSold ier
S O
ĠNov el
Ġe tym
ĠT ek
Ġtra it
Ġrig orous
Ġdifferent iate
le in
ĠP oe
Ġi Phone
ĠM uz
Ġgo ats
Ġemer ges
B orn
Ġobserv atory
ĠK ear
Ġaw ful
Ġtex tiles
ĠS B
ĠUn able
Ġtur moil
ĠRec ogn
Ġorganiz er
mb H
Ġhumid ity
H all
Ġconcess ions
Ġgu iding
Ġprogress ively
R h
ĠN anj
ĠMal m
ĠMes opotam
d est
Ġninet y
Ġcad ets
ĠSeg unda
w ild
ĠNure mberg
S D
Ġg land
Ġext r
ĠEn rique
t ically
Ġform ulation
ĠVirt ual
Ġsc anning
Ġdisc ern
Ġscar ce
qu ire
med ia
ĠR avi
Ġv ague
Ġsem inal
ĠMac Arthur
ĠTreat ment
Ġlit urgical
Ġpar aly
t alk
Ġmod ify
ĠBrig gs
commit tee
Ġc ows
ĠA by
th ro
ĠMore no
Ġdistribut ing
Ġexagger ated
Ġd ocks
un ge
Ġtur tle
Ġh ugged
Ġacquis itions
op ia
ĠVis iting
Ġ13 8
Ġemb roid
ĠBuc cane
cel ain
ĠC razy
arm ing
Ġvers a
ij n
il ot
ĠH ark
f eed
m ie
ĠU pp
ĠCon stable
' ).
im ov
ĠAssy rian
b ott
Ġlong itudinal
Ġfear ing
ĠRanch o
Ġendors ement
ĠDark ness
ĠCott age
Ġcoc onut
Ġcapt ures
Ġsal aries
Ġmut ant
Ġm ates
ĠS urgery
op oulos
Ġcon gestion
ore g
Ġjoin ts
at own
ĠAm herst
Ġsk ier
ĠDiv isions
Ġsaxophon ist
ĠMar athi
Ġgar bage
Ġviol ently
ĠEth ics
ĠBrune i
ĠB are
ĠFrem antle
ĠS EA
ĠBr ay
Ġperson a
Alex ander
Ġantis em
Ġcanon ical
an ova
19 35
Ġlaun ches
Ġpsy chedelic
Ġt ipped
ec ost
ĠUS B
ĠMy ster
ĠB id
ĠE ton
ĠY or
ĠMid night
Ġincorrect ly
ĠU V
work ers
Ġfrag ile
Ġinsurg ents
ĠR ector
ĠG im
ĠFl ames
Ġmult inational
Ġstuff ed
ĠIr win
Ġshore line
anche z
Ġcontend er
ĠHutch inson
Ġg le
Ġan gr
ĠSum mers
ĠRee ves
Ġrow er
Âł pm
Ġarchae ologists
Ġaff irmed
Ġgri pped
ren ched
ae v
iy an
ĠIll ustrated
oz oic
Ġhaul ed
Ġin activated
Ġsp ars
ĠScandin avia
fe et
l os
y ll
Ġgen etically
ĠEm ir
ĠRock et
ĠI UCN
ĠT ess
ĠH ai
ĠK all
ĠAC T
ĠOil ers
Ġup loaded
Ġover view
ĠPro duced
Ġunav ailable
Ġangr ily
A st
w ic
ĠDÃ¼ ssel
Ġb reeze
ĠO j
ĠWor cestershire
Ġcontamin ated
Ġn ouns
ĠLS U
ĠB is
Ġprior ities
Ġt ucked
et ric
Ġre arr
Ġsick ness
Ġbaron et
B i
ĠMor an
i ress
Ġimp erson
ĠStock ton
ĠWorld wide
Ġflow ed
Ad miral
ĠCom pton
Se ven
ĠMarin ers
Ġgang s
ĠKon stant
os itory
Ġâ ĨĴ
Ġ( .
ĠAs k
n ius
v ance
ĠMarqu ess
ĠAri el
Ġhazard ous
T a
b anks
Ø ¯
ĠÃģ lv
Ġcomp ress
ble ms
Ġden ying
Ġprot otypes
Ġinit iation
idd ish
Ġmess enger
ĠOrig in
ĠCram bidae
B rown
P an
ĠT ub
ĠP arma
ĠO DI
ĠE ps
op f
Ġsp ared
run ner
M arg
b ah
ĠP ix
il on
Ġvert ically
ĠT iber
iz u
Ġpres iding
ĠCo aches
Ġhor iz
Ġend uring
Ġgeneral ized
rec ogn
Ġj ailed
Ġrain y
w ed
ĠR AM
ach al
ĠDarl ington
ĠCongreg ational
Ġwho ever
Ġloc ker
tr ue
Ġtun ing
ĠF Ã©
Âł square
ĠFar rell
Ġfault s
c hens
ĠK eller
Ġturn over
Ġcoff in
Ġproport ions
ĠPr ak
Ġfron tal
tr adition
ĠCas a
Ġbiod iversity
Ġneck lace
Ġsatisf ying
W ind
ĠK athy
ĠG aines
ĠO sh
Ġp iss
ĠMon arch
S chool
ĠPro to
ĠWhere as
Ġmarri es
Ġporn ography
ĠR ise
Ġrout ed
ĠRe vel
Ġamb iguous
Ġtermin ate
ĠGuy ana
Ġle uk
ob l
n eck
ĠNottingham shire
ĠM ug
16 0
c reated
Ġorigin ate
Ġsepar at
ij ah
ĠG ond
Ġamen ities
gi ene
ĠCh loe
est ones
t ang
Ġstat utes
ĠAnt ony
ĠH iro
Ġimag inary
ĠBook er
ĠBow ling
Ġpossess ing
Ġhead line
ĠKey nes
ad as
ĠHer b
ĠSam ar
Ġn ails
ĠEl aine
Ġadmir ation
ĠRes idents
G ive
ĠMan ual
bon ne
Ġdisadvant age
ĠK ris
Ġgrass land
Ġerr one
ĠRom ero
ĠKat z
Ġshel tered
opp y
ĠC ory
ye ong
ĠCourt ney
d rama
Ã© mon
ĠHarm ony
ĠThanks giving
i ency
ĠB one
Ġen rich
11 1
ĠRabb it
ĠAm ir
Ġun lock
elig ible
N N
head er
Ġsuc ked
ĠR end
Ġrecycl ing
ĠE PA
ack ers
Ġinsp ire
ĠCon versely
Ġstraight forward
ed uct
Ġfl ux
Ġo ils
Ġnow adays
Ġannounc es
ĠRos ie
ĠS aga
Ġconf irming
ĠSk yl
Ġsil icon
L ab
Ġrepe aled
Ġst akes
t um
ĠR other
Ġcl aws
J e
Ġy a
Ġearn est
Ġmicro phone
be fore
Ġredes ign
dr ive
ĠScar borough
ĠG ru
ĠN eck
ĠReg ency
id uous
ĠG op
Ġpl edge
Ġhall uc
ĠBern ie
ĠN ights
se v
Ġab uses
ĠC oin
ĠFa ust
ĠSpl it
r ative
Ġliber ated
Ġaper ture
le ine
ĠK ag
Ġun le
Ġfool ish
Ġacc ol
Ġt an
r ase
Ġ17 79
ĠIntegr ated
izoph ren
ĠD I
ur ious
ĠA ar
Ġmod ular
ĠL om
Ġremaster ed
ĠB ali
ĠMon key
Ġcal iber
D NA
ĠMet all
ĠH af
ĠK ud
Ġpack et
Ġfat igue
ĠNear by
esc u
Ġexperiment ed
Ġex ited
ĠRe ese
Ġsl im
ĠN inet
ĠRes ervation
ĠAb ig
ĠRob bins
Ġtr aj
ĠEng el
Ġmor ale
Ġfisher ies
ĠD ot
trans fer
ĠG AA
Ġinter l
ĠL anguages
Ġstri pe
Ġperf ection
ĠVick ers
Ġcl enched
. :
Ġchore ographer
uc ing
Ġmut ually
ĠG O
ĠO mega
ĠFried man
ĠFe eling
o it
ĠL illy
ch io
Ġtil ted
Ġw akes
Ġf ancy
Ġbel ts
ĠCor b
th us
ed ar
ter a
Ġsp lend
Ġbene fic
ud s
be g
ens ing
ob le
ul led
Ġret ri
ĠPast or
ĠHort on
Ġn arc
ac ial
Ġliter al
Tr ue
ĠAcad Ã©m
Ġvent ilation
Ġgraph s
Ġautobi ographical
ocaly pse
t aking
Ġant it
Ġpolic eman
Ġmyth s
Ġkeyboard ist
ĠTh underb
Ñ ĭ
ĠS ank
ĠÂ §
tr ained
Ġghost s
Ġrec ipe
ĠMov ies
ĠJ avier
Î¿ ÏĤ
Ġn em
ĠMa ver
ĠAss istance
Ġtim et
i Ã¡n
ĠMend oza
Ġr ites
Ġjud ging
Ġred isc
hen ko
ĠTurn ing
Ġmotorcy cles
ĠI EEE
ĠSerg io
m ach
Ġ3 20
ĠAng ie
ĠRos ario
Ġd ye
Ġcapac ities
ĠBern stein
ĠI AAF
ter weight
ann ie
ĠCl int
Ġbl o
count y
Ġapolog ize
ĠDÃŃ az
Ġep iscopal
h off
ĠBot an
S outhern
Ġp inn
ĠPat erson
Ġwand ering
W ould
ĠPl ata
Ġretreat ing
in ar
p ace
ĠF ang
Ġv andal
ĠZ ack
ĠChe ck
ĠDex ter
ĠT T
ĠBar low
Ġver andah
ithm etic
E astern
Ġt renches
Ġpass er
ĠB urt
ĠJ ah
oc ative
Ġdis closed
Ġrepr ised
ĠG mbH
Ġimprov ised
l Ä±
ul ators
19 10
r ush
Ġt sun
igh am
com m
Ġconfident ial
ĠWalk ing
Ġopp ression
ĠS oy
ĠS ands
F ather
port ion
Ã´ ne
Ġcod ing
Ġlingu istics
Ġdistingu ishing
T ex
l iv
ĠAt omic
og rams
ĠPark inson
ĠD ent
ĠFel ipe
L ear
Ġp ork
ng el
ĠComp ared
j on
ĠBr ack
Ġen ergies
Ġ178 5
ĠJe anne
ĠOlymp ia
Ġconv ictions
ĠU TC
ch al
Ġcondition al
ul d
ĠSl oan
Ġt rom
ĠBl a
ĠSim s
Ġut ilities
G L
ĠHy d
ĠKab ul
Ġb idding
t ter
ill us
Ġ17 74
ĠNavig ation
ar nt
Ġrain forest
Ġcap itals
Ġm uc
ĠD B
Ġunder cover
Ġaccum ulation
Ġsew age
v ale
Ġp iers
ĠB ret
Ġconflict ing
Ġimp ending
Sw iss
ed ited
Ġcollect s
St at
Ġst ables
ĠI da
Ġcommun ism
Ġk eel
ĠY ok
v ara
Ġadv ise
Ġd ess
Ġindic ted
rit ical
ett led
n umber
Ġrep ay
Ġresearch ing
Ġmusical s
ip a
ĠBuck ley
Ġnatural ist
asion ally
Ġp izza
ape ake
Ġpost war
ald i
ĠT ours
Ġevid enced
ĠK O
Ġdisapp ears
Ġtram way
Ġqu ota
Ġdifferent iation
G F
air ns
Ġsmugg ling
Ġa pt
ink er
ham mer
Ġmel ted
Ġunf ortunately
Ġb enz
Ġreserv ations
T otal
ĠReg arding
ĠC ag
ĠF raz
ĠN arr
Ġpart isan
Rep ublic
ĠSp ur
ĠMult i
P od
s ic
ĠOr ion
Ġphysi ological
ĠAdv ocate
Ġr ink
ĠBel lev
ĠSk ating
ĠOxford shire
Ġtown land
ĠRad ical
ĠMid way
Ġinfring ement
S ummer
ĠCop yright
S W
Ġsh o
ĠRe ader
Ġfarm house
Ġprep ares
Ġwilling ness
ĠB aja
Ġdest iny
ig ated
Ġremember ing
ĠAzerbai jani
Ġsuppl iers
Every thing
ĠRhodes ia
ion age
Ġl ions
udd ing
18 0
ĠS ession
Ġsan itation
Ġtransition al
Ġobst acle
oles cent
Ġmention ing
ek s
ĠBl anc
ĠÃ Ĩ
Ġinput s
ĠF ate
ĠF ey
AI DS
Ġblack smith
Ġc ripp
ram atta
aun ton
ĠMad hya
Ġsurround s
als a
Ġdef ens
iÄ Ļ
Ġsad ness
ĠMission ary
ĠBeth lehem
ĠM R
ĠB ore
Ġcoll ided
Ġas phalt
ew s
Ġcig arettes
ĠBl uff
Ġapproxim ation
ĠSh and
Ġmal aria
g rove
j ack
Ġmosa ic
Ã¡ rez
ĠMal one
Ġinvest ing
ĠCent ers
L V
ĠTrans ylvania
ĠDÃ¼ssel dorf
ĠWh itt
ĠJur is
S anta
Ġc asc
ĠP T
ĠE ust
ism ar
H o
ĠGate way
Ġt andem
ic ans
Ġclos es
ĠG in
Ġtun ed
let ion
Ġswift ly
S ong
Ġs eller
ĠT arn
ĠP E
Ġmay oral
ĠPol ynes
rup ting
ac i
Ġdrag ons
Ġl ance
Ġgo at
Ġfund ament
Ġmistaken ly
h im
Ġcre ep
Ġbreak up
v ili
Ġencompass ing
19 12
Ġaggreg ator
Ġautom obiles
Ġle arnt
Ġdem os
yr us
D utch
erm at
ĠWood ward
ĠMaxim ilian
Ġluc rative
el ian
Ġy east
Ġstory lines
Ġsc outs
ĠMar a
ĠSp ark
ĠSund ance
Ġw izard
ĠAlexand re
ĠRif les
ĠW oll
erman n
ĠLouis a
Î ´
ĠJ ol
ĠEll ie
ĠS anchez
Ġhighlight ing
Ġprosecut ed
ĠAdvis or
Ġsk ater
Ġc emeteries
ar ak
Ġtest ify
ĠMcK ay
å Ń
Ġ17 72
Ġparent al
ĠBots wana
omed ical
ĠVehic le
Ġrecip es
Af ric
ĠEd o
Ġex claimed
ĠCur ling
Ġtr uce
Ġrep uls
Ġcr ashes
ĠSol utions
Ġpetition ed
ĠC andy
ML L
ĠK Y
Ġ13 1
ĠB rough
ĠB isc
Ġrec ession
pro ducer
Ġanarch ist
ĠSeah awks
Ġcrash ing
ĠM ersey
ĠL ama
V en
ĠU prising
ĠJer icho
ĠY ad
Ġquart z
ĠCommun ities
ri ac
ĠMu ir
f acing
Ġinj ust
ion i
ĠK Ã¶n
Ġbutter flies
ĠSy ed
ĠJul io
Ġyouth s
D L
Ġcl one
ĠDeb bie
Ġverte bra
Ġgroup ing
ĠFred eric
d eterm
ĠC afe
br idges
J A
j s
ĠNe h
ĠMack ay
Ġser pent
wh ose
ĠOl sen
Ġswall ow
ĠG ive
Ġpatri otic
re ous
Ġdr astically
Ġtotal ing
Ġenl ist
Ġvibr ant
ĠChart s
14 0
b ara
ĠMass acre
car bon
Ġp a
ĠM ab
ist air
un til
Ġmon iker
term inal
19 29
Ġ ÏĢ
ĠDrum mond
as ions
act yl
ĠM enn
Ġrum ours
Ġhar b
Ġdistribut ions
Ġcroc od
c ox
Ġcycl ists
len burg
os itions
Ġcl ade
Ġreconc ile
Ġr uth
Ġcl aw
Ġsched uling
ĠFair field
Ġbrig adier
Ġamass ed
ĠPras ad
y Åį
ĠF ountain
Ġalt itudes
al ities
Ġe clipse
at ian
pro cess
ĠVic ar
Ġpamph let
ĠSam my
st ill
ĠJo Ã£o
Ġmerc ury
ĠD ai
if ix
ĠAc ross
Ã©t at
Ġspec ify
cur rent
h ave
ĠÎ º
Ġest r
l ash
Ġpr ayed
W ood
ĠPol k
Ġher bs
Ġlist ings
ĠS age
ĠR ÃŃo
ans h
ĠDom ain
Ġmourn ing
Ġsolid arity
Ġsam pled
Ġconson ants
Ġpsychiat rist
L ink
ĠGu an
Ġsouth bound
ĠHitch cock
ĠSt on
Ġreef s
ĠG B
Ġe ch
ack Down
Ġb ald
Ġ26 0
Ġpil grims
Ġapprentices hip
ĠBrid g
ĠE rit
n ort
her son
ind uced
ĠCent ennial
Ġsched ules
ĠViv ian
it ra
ĠC FL
Ġbr id
ĠDr iver
Ġchurch yard
ĠJerem iah
An ne
m ov
ĠSouth western
Ġnorth bound
ĠLan tern
ĠSiles ian
ex isting
ag les
Ġper pendicular
Ġkn ives
ĠG es
Ġn un
ĠG ugg
ĠK idd
Ġdis ob
Ġdiff usion
Ġright eous
ĠPon ce
Ġch alk
hen burg
Ġprosecut ors
f ight
Ġreal ise
od o
ĠArm oured
ĠConcer to
d id
ĠCh ant
Ġfemin ism
Ġsex es
ĠBir ch
Ġeyeb row
Ġlib retto
ĠFres no
Ġf its
ĠT rom
Ġsl ots
z ero
ĠP oc
Ġinter rupt
ĠBenedict ine
Ġb ump
Ġg ust
ĠBl oc
le ch
av ar
ĠPat ent
Ġo ste
Ġenc ir
ĠBarth ol
ĠBe an
ell um
if olia
Ġbarr ister
ĠP esh
form ula
Ġhy m
D ig
ĠN WA
ek er
Ġtop ology
ĠReg ard
ĠSim psons
v oc
Ġlaun chers
Ġutil izes
ĠSp ears
A dam
Ġb ids
clud ing
Ġmanip ulate
ĠResp ons
Ġmurm ured
ĠV ad
Ġfranch ises
Ġgrat itude
enc ement
19 43
ast ies
Ġwith stand
Ġtrad er
Ġro pes
ten stein
Ġpun ched
Ġapp s
Ġgrav itational
ĠCrime a
hab i
L U
ĠY el
ĠDor is
le ad
ĠV Ã¤
Ġfatal ities
ass i
Ġfore cast
ĠGod frey
Ġstaff ed
ic ients
unt ary
ĠSur in
Ġcur ated
if ical
ass es
Ġrem ot
s ac
Ġres orts
ĠO ch
red ict
Ġemigr ation
Ġmars hes
ac ons
ĠPh o
Ġfor wards
Ġoff enders
Ġmos ques
Ġoccup ants
Ġret ention
aly pt
ĠAs c
iter ated
ĠRams ay
ĠNickel odeon
Ġoverse en
j ay
ts ville
ĠSabb ath
oub ted
Ġpuzz les
Ġin verse
ear th
Ġl id
Ġinter state
Ġst al
ĠW P
cy cle
ver b
ĠK A
Ġimp at
B oy
Ġa ids
ĠP unk
ĠL ighthouse
Ġord ination
I ll
Ġsquad s
ĠArt icles
Ġmerc enaries
ĠCh ain
Ġev olve
Ġpre ached
tain e
Ġcar ving
Ġcr ushing
Ġserv ic
19 33
Ġest uary
Ġunivers ally
Ġsand wich
ĠOd essa
ĠMonter ey
ĠF y
Ġwreck ed
ob ar
Ġfro ze
ĠAlbu querque
ĠPet ty
ĠNic ola
ĠMead ows
writ e
ĠRoss i
Ġdis ruption
Ġmod elling
Ġbattles hips
Work s
S ol
ang ana
sp ot
ĠKel ley
ĠB auer
Ġpr aying
Ġd re
Ġa ce
il ations
Ġl ively
Ġl iable
ĠNik ki
Ġpill ow
ĠAlleg heny
ĠDise ase
O nce
ĠBow man
ĠGab e
S oul
as ures
ĠR PG
Ġexam ines
H ero
à ¹
co at
z in
Ġcy an
ĠTong a
y at
ĠH ib
Ġtract or
Ġchron ological
ell ery
Ġsc attering
ĠHuss ain
ĠT ory
Ġ178 6
Ġsort ed
Ġb isexual
ĠP I
ĠDick ens
ĠPhot ography
D ev
ĠR amb
Ġb inds
ondiss ement
res pect
ĠDist ribution
en bach
ĠBj Ã¶r
ĠGert rude
Ġd umped
" ]
T oday
Ġab usive
Ġrehears al
Ġweek days
ĠKa hn
ĠKend all
we ather
ĠOr acle
Ġbus iest
Ġver ified
ĠFay ette
ĠKnox ville
19 11
pt onshire
ĠCount ries
Ġself ish
ĠF aul
Ġev e
E ll
Ġunp ublished
Ġamid st
ĠDram atic
t ting
ĠK ron
Ġcl ick
we iler
ĠAir bus
Ġthr iving
omes day
ĠH add
row ave
ich t
Ġcell o
Ġr att
ĠAj ax
ĠA W
Ġstart led
ĠSpirit ual
Ġar id
oid al
ĠBre ed
F riend
t ics
ĠHam as
ĠHand ic
ĠTyr one
Ġk g
Ġl ament
ident al
Ġcross ings
Ġpretend ing
Ġpard on
Ġmyst ical
Ġacqu ainted
S ign
am ura
Ġw edd
ĠSuz anne
Ġt rop
ades hi
ĠAle ppo
Ġens ures
ĠWild e
ĠRB Is
ĠAm es
ĠEnt reprene
Ġmim ic
Î ¸
et es
ĠNick y
enc hes
Ġ13 6
aff iliated
ĠSal mon
Ġunf ortunate
ĠShield s
ener gy
ĠKh mer
ĠS TA
Ġsouthern most
ĠR enn
ĠAP I
Ġinterrog ation
Ġhost ages
s q
ĠH alle
ĠR hy
ĠE specially
Ġsalv age
ĠV P
ĠImport ant
h wa
Ġso fa
ĠEncycl opedia
z cz
ĠD ahl
Ġthread s
Ġg igs
ĠCh Ã¢teau
ĠAct ivities
Ġnational ists
Ġfrog s
Ġco hes
Ġprop onent
ow icz
Ġ20 21
Ġaud it
19 27
Ġhum ble
imp se
Ġo lig
Ġshort est
ĠTour ing
Ġtow el
Ġmed ications
Ġdivers ion
ĠHur ling
Ġrepro duce
Ġgun fire
ĠClark son
ĠâĢ Ŀ
Ġnew born
urs ions
Ġhym ns
er at
Ġnot eb
Ġpsych ic
th i
Ġmot ions
ĠWeb ber
Ġcomed ic
Ġconf using
aw at
Ġshowc ased
O rig
Ġe cl
Ġman ually
ĠCom ment
ĠSc hen
ĠTurn pike
ĠY iddish
the ir
Ġtur rets
Ġacquaint ance
ĠOper ating
Ġdriv eway
Ġsty ling
ĠErn ie
ĠHel p
Ġverte x
ich y
Ġcover t
ĠMac donald
ĠA ster
19 22
Ġcosm ic
ĠE ch
Ġinv aders
ĠI o
Ġt urt
Ġexplo its
um at
we g
Ġmaster piece
ĠHa itian
Ġcom a
Ġnorthern most
ĠPent ecost
ant z
ĠCred its
Ġattack er
Ġinterpre ter
ĠSiles ia
ĠMain z
ĠYan kee
tern ity
ins ic
Ġhero in
Ġdisturb ing
ĠW iel
ĠJ ammu
Ġincent ives
ĠG og
an ity
ĠCy cle
Ġsubsid ies
Ġlaugh s
nd s
Ġer otica
ĠPap a
ĠPomer anian
pound er
ĠThat cher
ĠGo al
ad ores
lu x
rit is
Ġwater front
ĠX ian
D irect
Ġinter disciplinary
ĠC Ã´
Ġst ing
ĠMe et
l ap
Ġanaly tical
ĠShip ping
l ord
Ġrem embers
Ġpick up
rehens ion
Ġgam ma
ĠF ell
Ġerup t
ub ishi
uc co
ĠK is
Ġag on
Ġb ron
Jes us
ĠA uxiliary
ĠN ico
aur i
ok ane
Å¡ iÄĩ
k owski
Ġ15 2
19 32
Ġclim bs
ĠSun set
sch ule
Ġgear box
Ġcoeff icients
V FL
gu er
h oun
Ġf oli
ĠL ange
ĠG ail
Ġconce al
j er
ĠL ass
act us
Ġjust ification
ĠJud ah
Ġcar cin
Ġbul b
ĠWat ford
Ġch ill
Ġhead master
Ãº n
Ġcur v
D oes
am iliar
ĠBa um
F ine
ĠOd isha
Ġsm ok
Ġsne ak
ĠU til
az er
ĠGi ac
b inding
ag ging
ĠShe p
ago ons
ri ot
ĠMcC all
ĠFul ham
por ters
aff ected
ĠMcK enzie
Ġtot als
or os
Ġchalleng er
ĠYuk on
quis ite
Ġlandl ord
Ġlav ish
Ġobli que
L ith
Ġtreat s
ĠNortham ptonshire
Ġin clusive
Ġhyp ot
Ġgorge ous
op athy
ĠMor ales
ĠB ub
Ġrecord er
qu il
N ic
uk o
ĠHow ell
ĠTri angle
ĠPo ole
Sh ow
Ġinterven ed
ĠClaud ia
ĠDo om
part s
Ġsh afts
Ġprot agonists
class ified
hab ited
ĠVamp ire
19 28
its ch
ĠBrew ery
Ġintric ate
ĠH ain
ew ell
ĠAb ram
Ġcounsel ing
Ġamalg amation
Ġwh istle
Ġconfess es
Ġshort ages
ĠAct ors
ĠSah ara
Ġsummar ized
oe uv
f ica
ĠConn ie
ĠCÃ³rd oba
T em
y ellow
ĠS uez
Ġfront man
ĠA U
ĠD umb
Ġrecogn izable
ĠStephen son
ĠG aut
Ġbr ightly
ĠAd en
Ġ13 7
ĠNort heastern
Ġpredict ions
t te
ĠWal ters
ĠDis p
ĠK orn
Ġbeh ave
ĠBuck s
Ġprolifer ation
ab ody
19 34
tern ally
Ġinter medi
Ġmin ed
Ġexpend iture
Ġa in
w ould
Ġc rap
ĠH ume
ai us
Ġun law
Ġ# #
duc ers
ĠK iller
ĠGar land
ĠG da
Ġalleg ing
J ones
c art
Ġhydro x
M ajor
or b
ĠM oin
uc o
ĠCha os
Ġkn ots
Ġax e
ĠAmong st
ĠBon ap
ĠAlong side
ĠMec ca
ĠM ixed
ĠLe a
Ġhospital ity
un o
Ġdet ector
ĠSw itch
ord e
ac ca
ess el
ĠPear ce
Ġpro stitutes
Ġlob b
ĠAnders en
omb a
Ġindef initely
Ġforc ibly
ĠC roy
ĠL ack
ĠSur v
Ġpseud o
ond heim
Ġb ibli
ens burg
V ery
Ġtrib unal
Ġfract ure
oclass ical
l ang
ĠWil kes
R o
ĠSh r
ĠC ary
Ġmask ed
wood s
ĠRhin eland
f ired
Ġfirst ly
Ġmodern ization
airo bi
ay ama
ĠZ an
ĠOt ago
ĠIber ian
ĠPlant ation
ĠKun st
ĠChronic les
ult imate
ĠVol ta
ĠDaniel le
ĠBr avo
Ġcertain ty
ĠExt ension
ĠSina i
ir is
Ġaward ing
ĠHer od
ĠSt av
C as
m ia
Ġn u
Ġbl ond
p ay
roph ys
Ġb ak
ĠMat ilda
all ow
ĠCur rie
Ġmil estone
A mb
Ġins ights
Ġdi agonal
Ġhy ster
Ġlaund ry
ĠRed dy
Ġinterf aces
x ico
Ġm oss
ĠSh rine
Âłl b
L ake
Ġdestroy s
ĠAl istair
ĠQ i
Ġp es
Ġk ins
Ġweigh s
Ġout doors
ank ton
ĠPhil ips
Ġind ul
Ġ28 0
ĠAk bar
Ġs idel
ĠB ek
ĠE ther
Ġens embles
Ġindic ators
onc Ã©
Â ·
Ġsp ire
sc her
Ġinitial s
Ġ 000
k on
ĠShe ldon
ph thal
Ġang ered
Al bert
l ocal
Ġthere of
ĠSy mb
ĠMerr ill
ĠColling wood
Ġp iston
Ġbuck et
ech t
ĠPasser iformesFamily
Ġ \
Ġun limited
ĠJoseph ine
Ã© ra
Ġhead lines
Ġrem inds
ĠSt okes
al ey
och i
Ġmigr ant
ĠMiddles brough
ĠSchum acher
ĠPet r
Ġdias pora
Ġs ore
ĠA E
ĠBl iss
ale z
ĠMal aya
ĠAr bor
ry ption
Ġest e
dom inal
ĠRam os
miss ible
Ġsymmet ric
m unicip
ĠM oll
od erm
Ġeduc ators
ĠLev ine
Ġpharm acy
Ġstub born
Ġharm onic
ĠV FL
ĠA BS
Ġhonor able
Ġsew er
ut ral
Ġf used
ĠL ia
pro bably
ĠAl ready
Ġbo iling
Ġform idable
iz zy
ĠMon a
Ġhead er
ĠUn its
ĠPass enger
el ton
Ġreg ener
ĠA mp
omen cl
Ġemer itus
t v
ĠMaid en
Ġ13 00
Ġnest ing
og ens
ĠAd a
ĠCyn thia
/ .
Ġorganiz es
Ġdet r
Ġpar agraph
ĠSup erc
Ġhero ine
ĠG lend
ĠScout ing
Ġprejud ice
Ġe uros
ism o
ĠPubl ished
Ġmont ane
Ġnight mare
icy cle
ĠCam ille
ĠLe agues
Ġrat ios
Ġgather ings
fem ale
f el
19 17
ĠSc ene
Ġmin istries
Ġparam ilitary
Ġdet ach
ĠPut in
s n
Ġaudition ed
Ġg um
Ġmy stic
Ġp ushes
ax is
Ġpenet ration
Ġpar achute
ep isode
ĠDe h
Ġcons oles
raff iti
pow der
Ġoverse es
Ġown ing
Ġunder min
× Ļ
v ation
Ġactiv ate
ĠMel anie
ÑĢ Ð°
vol ent
c ote
Ġc afe
ĠCh at
Ġfree ze
ĠNewsp aper
l ip
Ġqu asi
h ik
Ġcartoon ist
ĠS ichuan
ga ard
ou in
ĠC ah
pat ient
ĠSl ater
ĠInsp ired
Ġbatt ling
ĠBart lett
ĠComp uting
Ġnews letter
ĠArchae ology
Ġgr abbing
Ġminister ial
Ġco aster
Ġgl impse
ĠTasman ian
P ark
r ally
us an
Ġend owed
ĠKal am
Ġinad vert
ĠPatri ot
ĠAnk ara
p ng
ĠH et
ĠSch we
resp ons
ĠG one
ent iary
ĠN ike
Ġfu els
ĠW ies
Ġoverl apping
ĠCad et
Ġfo il
Ġd wind
ĠF iat
sh adow
å ·
ident ally
Ù İ
ĠLe aders
Ġinter iors
H uman
al bum
Ġ27 0
Ang el
Ġutter ly
ĠK Åį
iet ta
Ġfashion able
Ġcons picuous
Ġthigh s
Ġb ub
ĠSt ade
Ġexp onent
ocr acy
T oo
Ġb ounced
ĠP ec
1 15
F lor
ĠF aw
B enz
Ġnegot iation
Ġer ad
ĠÅ »
s erving
ĠV ille
Ġeven ly
Ġfurn ish
Ġincur red
S ocial
Ġpro stitute
Ġmanif old
M CA
Ġch ieft
ĠIn strument
ĠLomb ard
ĠH A
rid ors
Ġplum age
er ton
Ġdr one
Ġt am
urg a
Ġbetray al
+ +
ĠS entin
ĠC ebu
IN E
dou ble
ax ies
Ġev olving
ĠAl ways
Ġsh arks
Ġover flow
Ġgraph ical
S port
ĠR hys
Ġstory telling
u aries
Ġsn iff
ES T
Ġax es
Ġplanet ary
ĠBohem ian
Ġa kin
ore an
ĠAud itorium
ĠMut ual
ĠP ett
Ġsouth ward
ĠShop ping
ĠHir sch
Ġst alled
ĠCanad iens
ĠHa ifa
rim p
Ġsqu at
ĠVil nius
L F
p ox
ĠSp arta
Ġcou pling
Ġro ds
Ġsum s
S ha
Ġrem inder
10 6
ĠHur ricanes
ĠS ai
Ġdis agree
19 13
Ġbacter ium
ens k
Ġtact ic
Ġe ased
Ġhon oring
Ġadorn ed
Ġge ologic
Ġstorm ed
ĠPere z
Ġbl oss
Ġbas il
ĠRud olph
ĠTarg et
b eth
Ġinstruct ors
ĠT I
ĠL aus
Ġmain line
ĠFellow s
Ġtel enov
ĠH usk
four th
C a
Re ally
Ġrept iles
Ġdon ate
Ġph ased
itch fork
ĠSex ual
ĠSc her
Ġlist ener
val ue
Pro v
i atic
ĠPost al
ĠHul k
ass oci
Ġperiod icals
ĠStr and
ĠBuckingham shire
ĠPasc al
Ġel astic
Ġforg iveness
C T
ĠG und
Ġestabl ishes
Ã¸ y
ĠQuÃ© bec
Ġc ache
Ġsal oon
Ġtrou sers
Ġf t
ar ab
R un
sh oot
Ġball ads
ĠBuccane ers
ĠSer ver
Æ ¡
ĠMust afa
ĠX iao
eon ato
Ġb il
ĠJ ump
Ġs ails
Ġex termin
Ġper me
Ġmult itude
ĠLill ian
' ),
ome z
ĠReg inald
ĠMac Le
ĠFisher ies
ĠS ame
Col onel
Ġ14 7
Ġdiplom acy
ĠG rowth
Ġass ure
l oy
Ġc ries
ĠJ P
Ġout spoken
ĠPe abody
Ġsubject ive
Ġc ute
Ġcam oufl
ĠSpart ans
g re
ag eway
Ġblack ish
ĠT eng
Ġmigr ate
ĠRe ef
O k
est hes
Ġmyth ological
ĠK ild
ud ing
ĠMer lin
Ġre claim
ĠMuss olini
Ġo d
Ġal umnus
ĠMi G
Ġauthent icity
19 25
Ġsun set
S i
se au
Ġuniqu ely
s earch
t u
Ġf ern
ĠD enny
ak rish
n om
ĠBel ie
ann es
ĠBr ass
ĠPat ton
Ġham pered
ĠF us
ĠCat alog
Ġfol ks
ĠGugg enheim
ĠN airobi
Ġc m
ĠMc P
Ġartic ulated
ĠSard inia
Ġm uzzle
B ank
ĠPar ramatta
ĠGuang dong
at uring
Ġpsych oan
it ures
ĠConsolid ated
Ġ22 5
Ġcater ing
air a
ĠMac qu
ĠBon if
ĠSpe ech
Ġhem isphere
Ġposthum ous
ĠHa ute
Ġmon soon
izz ard
Ġcor on
Ġliv elihood
ĠN PR
ĠH ens
ĠP ais
ĠChar acter
Ġt abl
ĠC rest
Ġcelebr ates
ĠVer d
ĠChes apeake
Ġdec ks
Ġpat ience
rick s
Ġconcentr ating
Ġal le
Ġpar cel
b ao
ph alia
ins ular
ĠHu i
ĠHok k
Turk ish
v ana
Ï Ĩ
esh iva
ĠW illem
ĠK ali
Ġbatt led
ĠG R
Ġp ins
ĠT oni
ĠP urs
And rew
ĠNanj ing
ĠEr ich
Ġun equ
ĠAn c
unk ers
Ġharn ess
Ġband width
ĠGuth rie
u ve
ĠShe pp
19 31
Ġart works
ian na
Ġch ords
ple asant
Ġpur ity
Ġchore ography
ĠD ane
ed itor
ĠMir za
Ġt astes
ĠS ime
Ġl eng
her a
ĠE f
od ic
Ġpro st
ĠThe odor
ĠHod ges
ĠAnd alus
ac ulate
ĠSaw yer
B ey
Ġtum ors
Ġsm oot
Ġbo asts
Ġbelie vers
ĠAbig ail
Ġn ap
Ġscream s
g au
Ġsed an
Ġmyth ical
Ġsight ed
l us
ĠE bert
ear ly
Ġpre fecture
Mod ern
Ġs add
ĠP hyll
ac erb
orn a
ile en
be i
Ġarrang ing
ĠHo hen
Ġw oven
ier z
af ar
ĠGreen ville
Q L
m ak
ce ans
Ġsubdiv isions
Ġun identified
Ġdraft ing
Ġrepe al
ĠAless andro
Ġrep ression
Ġevangel ical
Ġc ops
ĠF ah
Ġad herent
Ġlegitim acy
Ġr ushes
Ġaqu arium
ition al
Ġdef ect
accept able
Ġsub du
Ġguard ing
Ġstrength s
Ġmoll usc
Ġpenetr ate
mark s
Ġreservoir s
Ġan ecd
Ġres h
Ġsc rat
Ġsl ab
int a
ĠMits ubishi
Ġped al
rib ing
Ġb ikes
ĠAl ain
Ġinsp iring
ĠF ife
ĠLu ftwaffe
Ġal ma
ĠC hest
rop he
Ġpack ing
ĠSchles wig
ĠA i
ĠVis itors
arn o
Ġimp lying
ĠVen k
ox ic
ĠCur ry
ĠGun s
ĠSain te
K e
Spec ial
Ġcommod ity
m ale
Ġd inosaur
qu ito
Ġmaster ed
Ġlo ft
ĠPre vious
Ġdoub ling
Ġfat ty
ĠHe p
Ġ14 1
ĠD ort
Ġ14 00
Ġoccup ational
ĠHal ey
l ib
Ġjud iciary
ĠTrip oli
ĠJagu ar
H oly
z ac
ĠOt is
Ġsc aled
Ġ14 6
ĠPen ang
ĠThe rm
Ġgrab s
Âłk Hz
Ġpet ty
qu arter
ank ed
N B
ud ad
Ġthank ed
m ind
ĠHel ens
Ġam p
Ġjourney s
ĠO ricon
Ġcr acks
Ġcinemat ographer
ĠM G
ri eg
b ill
Ġed ged
ĠK ep
ĠTri als
Ġw re
ĠBre nda
ĠHell en
Ġpoison ed
ĠTiff any
ĠB AF
ĠJo anna
ĠBur r
ing a
Ġwhere abouts
Ġquad rup
Ġjealous y
ĠDun edin
Ġbright ness
ĠAlz heimer
d n
à ¨
ver e
hr m
Ġmetab olic
Ġn urt
Ġtend encies
Ġexperiment ation
at ia
Ġf ried
ĠB ai
Ġins ol
p est
Ġrub bing
ĠJuvent us
e ither
ĠL iqu
Ġfurn ace
ĠNort e
ari idae
B ern
Ġd uc
ĠW ig
ĠY ates
ĠLeaf s
Ġcomed ies
ll o
Ġref res
Ġm ornings
Ġcomplement ary
ĠM amm
Ġcap it
ĠAlej andro
ĠCom pl
Ġspr inter
ĠAdv ance
Ġoct agonal
Ġsh ades
ĠC K
ĠFair y
Ġinflamm ation
ĠMys ore
h ir
ĠSar at
ĠCass idy
st ood
ad le
ĠZ he
Ġunw anted
ĠH ary
ĠY ing
Ġorn ate
ĠAna heim
Ġin ward
Ġnarr atives
an ov
ĠB rest
oc used
Ġdin osaurs
Ġcr ane
Ġobject ion
ert a
N BC
Ġd unes
Ġrev oked
ĠLabor atories
Ġunf amiliar
Ġstim uli
Ġassemb lies
Ġremov es
Ġmonkey s
ĠJo achim
its a
inc ed
ĠComm ittees
Ġ13 4
Ġrepro duced
Ġo we
Ġcult urally
our age
Ê ¿
ĠUn ified
ĠOut door
oubted ly
ĠS ounds
Ġgro ove
H al
ĠEst abl
Ġins istence
ĠSar awak
ĠSub way
ez vous
in ic
Ġdrunk en
Ġt avern
Ġey el
ĠMag istr
M ake
ĠA ero
Âł =
Ġbul lying
ĠInv asion
ĠBl anche
Ġobit uary
in ous
Ġg ossip
met al
Ġdys function
unn an
Ġs aga
Ġsch izophren
Ġlot tery
Con f
ĠCommand o
ĠG arr
Ġsw am
ĠFre em
oult ry
Ġd aring
Sil ver
b omb
Ġdisc onn
Ġembarrass ment
H M
Ġm oor
ĠCons ul
ĠTy son
build ings
gh am
ook er
ĠSin atra
ĠS inn
ĠB oulder
19 23
19 21
Ġmight y
it ably
ĠZ ool
Ġp est
Ġglac iers
ort ic
Ab d
Ġresid ues
Ġfire works
Ġassault s
Ġim pe
Ġtotal ed
Ġincomp at
Ġf ines
ĠTh al
Ġfring e
Ġco ating
lic a
or ously
ar um
Ġtsun ami
ĠR ae
Ġhy dr
An other
ĠBank ing
Ġpor celain
Ġcompl ain
Ġrub ble
An na
ĠEl k
Ġdoub ted
Ġprogress es
Ġrecount s
s ister
ĠD ap
ĠCal ab
Ġconv oys
Ġsyn onymous
Sw ed
ĠDew ey
Ġcarn ival
ĠDuk es
U m
Ġtre k
Ġsynt ax
ĠBi ological
J oe
pos itive
ĠG om
lev ant
Ġcinem as
Ġg azed
Ġqu int
Ġconnect ivity
Ġpun ches
Ġspecial ising
ĠBeng als
Ġtax a
1 12
ĠAst ros
g rowth
Ġmis leading
Ġneutral ity
W olf
ĠCar ab
Ġexplos ions
Ġpatri ot
ï ¼
Ġext rav
Ġsp lin
ĠMir iam
ĠR isk
Ġd oses
ĠS Ã¶
irst y
ĠNar ayan
ven ge
ĠJu ven
oy er
ĠZ epp
J am
ĠT NA
Ġpast ure
Ġcontrast ed
ur ry
rog ate
N orthern
ro st
ĠL one
Ġder by
S F
Ġsens ed
Ġabandon ing
Ġwrest led
ad ur
ĠB red
Ġsl ain
ati ya
ĠShar if
ĠP arn
ĠD enn
ĠF F
Ġpro w
Ġall iances
b ows
ĠB aird
Ġstere otypes
Vir gin
Ġfor er
Ġan onym
Ġsl ides
ĠSched ule
cip ation
M os
Âł inches
Ġco h
iro v
ĠKhor asan
N ET
Ġflo ated
ec he
ĠV ac
CA CAF
ĠRow land
ĠNob ody
ĠHut ton
Ġsp arse
or ity
ĠA HL
rou t
organ ic
exp ensive
ac er
ĠW J
ud y
Ġhous em
ĠProm otion
ĠBath urst
ĠVal erie
ĠGal ile
cl ick
Ġcred ibility
ĠF anny
Ġcomr ades
Ġrot or
Ġpric ing
ĠMa it
ĠStev ie
ĠImpro vement
ĠT olk
ĠF ruit
Ġdist orted
ĠL ingu
op o
ha ired
at he
Ġtank er
Ġunre li
ĠAm nesty
Ġanaly zing
Ġlit ter
ĠTown s
ĠF ocus
Ġdec iduous
ĠSpect rum
Ġmedic inal
ĠProject s
Ġump ire
Ġconfig urations
Ġro be
ik ers
Ġprefer ring
you ng
north west
Ġclar ity
Ġrall ies
m arg
Ġrepl aces
Ġfron ts
h ler
al p
Ġext rad
ĠZ ag
Ġsuper b
ĠYah oo
Ġmarket place
Ġs oy
Ġtransition ed
ĠOd ys
ĠWe ir
> *
Ġperiod ical
ĠAx el
ĠLoy ola
Ġrel ent
i ator
de al
uts al
ĠFund ing
Ġbast ard
O U
H I
Ġr iv
ĠBrown ing
ĠHem isphere
Ġc ough
Ġadmit ting
ĠChey enne
ĠT ide
ĠM V
epend ence
Ġorphan age
ĠÎ ´
sp ur
Ġeff icacy
ig ua
ch at
con ference
Ġsw ore
å ı
Ġal der
ĠSt all
19 24
Ġex acerb
w ah
ĠT ik
Ġwas t
19 26
os omal
Ġne on
Ġloc king
arri es
Phil ip
Ġ4 000
Ġret ract
ush an
ĠP ah
Ġrec ol
ĠBarn ett
Ġrepe ats
ĠRT Ãī
ĠLou d
ĠGior gio
Ġinj unction
Ġst ature
grand father
B oston
Ġo dor
ĠVer ona
ĠPeng uin
Ġ14 2
ĠBernard ino
ĠRe bel
Ġorgan ising
Ġbow ls
Ġreg istry
Re illy
hrm acht
P rot
au ff
Ġapolog ized
k ha
ĠOce ania
ĠW ain
Ġdis like
ĠThous and
ĠMa ure
ĠSu ite
char acter
ĠK K
Ġapp et
Q aeda
Ġb anning
ul ata
Ġar ter
Ġag grav
ĠKam al
Ġincent ive
op ers
ĠBey oncÃ©
ochem ical
ĠW ife
ĠWh is
ĠFl am
Ġbar ony
ĠRub in
Ġp all
ĠP urch
ak sh
Ġge ographically
Ġbot hered
ĠS onic
Ġequ als
ĠS rin
ĠUnion ist
ĠForest ry
Ġsh ale
Ġsub stitution
ĠWill ard
Ġd rafts
col onial
orr h
Ġascend ed
ru k
Ġrepl ication
Ġpar a
ĠMong ols
ĠB apt
aj ara
ĠU HF
Ġsurvey or
Ġt weet
ĠDom estic
Ġá ¸
ĠMacqu arie
qu ette
Ġdisbel ief
Ġw itches
Ġturt les
S in
P oint
inn e
P ak
ib urg
ĠSh adows
ĠDam ien
Ġdisagre ements
æ ľ
ĠHam m
ĠVent ures
Ġjer ked
Ġcatch ment
190 5
Ġconsum ing
ĠJur assic
Ġecl ips
Ã¢ r
Ġconvey ed
Ġtr ay
Ġcomp utation
v il
Ġar ithmetic
Ġswing ing
umen ical
ew ays
ĠV erg
Ġ[ "
10 3
ĠPre p
Ġvulner ability
Ġgymn ast
Ġserm on
Ġat roc
Ġhorse back
Ġnarr ation
ĠH Ã¶
ĠMas ovian
ĠRu iz
B aptist
asm ine
ĠSpart an
ĠM insk
p ossibly
Ġl yn
ĠJ ee
ĠSp okane
ĠSultan ate
á¸ ¥
ĠK aly
ĠWrest le
s yn
ĠT oll
Ġfor ums
B ang
Ġv owed
Ġty r
ĠCON CACAF
Ġr ou
Ġdis emb
ĠSil ence
er to
Ġcommission ing
Ġmisc onduct
ĠZion ist
ow ered
ĠHarr ington
ĠOther wise
Ġbur ials
Ġtox icity
b ler
Ġkin ase
Ġvit amin
Ġqu ar
Ġret ali
umb o
Ġdrown ing
l id
ĠSam i
ĠPue blo
p hen
Ġd od
Ġann ih
ĠUs ers
Ġl am
Ġinto x
Ġstr ands
Ġsabot age
uck ing
ĠM CA
áº ¡
l al
f jord
ĠCamp eonato
Ġst alls
ret ched
ĠCons ider
Ġfeder ally
Afric an
19 15
Ġprophe cy
ĠSwind on
ĠGor ge
1 13
Ġg ol
Ġpop ped
Ch air
ĠCob ra
L ine
av age
ĠP es
ĠSh ik
ismar ck
b la
Ġdownload s
Ġinver ted
ĠK erm
Ġla ude
ĠRun ner
Ġdelight ed
Ġplaint iff
ang ay
ĠBr ut
ĠGe omet
ĠLa wn
Ġcounter ed
Ġp ars
Ġinform ally
Ġdry ing
ĠMonten egr
Ġco herent
Å¡ a
p ian
Ġorgan ise
ĠAr s
ĠProt ector
aud eville
ĠRodrig o
act ivity
ĠBro d
Wh ile
Ġup side
Ġmix es
ĠT um
Ġfinal ized
Ġsubstr ates
H om
in it
Ġs arc
ĠRow an
K im
S n
ĠBry n
Ġs ib
Ġc rafted
ĠD irection
Ġout fielder
Ġâ ī
ĠUrugu ayan
Ġte ased
ĠCon cept
ÃŃ as
bil isi
Ġcor ros
T am
Ġcapital ist
iot ics
Ġec lectic
adu ates
ĠBr ant
Ġexp atri
Ġsign alling
ĠThess alon
ier o
Ġdirect ory
D ance
Ġpl c
Ġcur b
Ġharv ested
Ġsec ession
ĠMor i
Ġquant itative
Ġvass al
Ġpro to
ans ky
uin ely
ĠT amb
uras ian
S pring
uit able
ĠBangl adeshi
Ġphosph ate
Ġcol t
Ġinform ing
ĠSuf i
Ġco x
Ġreact ors
H u
Ġdioces an
ĠR amp
Ġsp oon
Ġtrans ist
ĠBl ade
Ã¼ l
Ġco il
ĠEst ates
Ġingred ient
fif th
Ġout look
Ġgi ants
Ġdomin ating
le ments
de ep
Ġst on
Ġprom ulg
Ġdocument ing
ĠAdministr ator
Ġb ugs
Ġ17 63
ĠÂ ·
Ġcontrast ing
Ġfurn ished
ĠPemb roke
Wel come
Ġnotor iety
ĠF aso
com une
Ġg ul
Ġgrave yard
ĠLuz on
Ġadapt ive
Ġbefriend ed
ĠBonap arte
Ġno ct
eter ia
ĠMotors ports
ĠMeck lenburg
ĠI roqu
iv i
Âł BC
w omen
ĠMiss ile
d rawn
et ri
ĠMess enger
P s
ĠMin utes
Ġto ken
Ġad ren
Ġbas ins
Ġeconom ical
ĠNew market
ĠPhel ps
Ġreg ulating
ĠSt raits
ĠKaz an
ĠR ue
ĠG omez
ĠTh reat
ĠAl ive
Ġrecapt ured
ĠCroy don
ĠN FC
sh am
Ġspecial s
F K
at ius
Ġm ah
ĠReg ulation
ĠMy th
ĠS no
het ical
Ġl ur
Ġamb ushed
Ġrele vance
ĠLang ley
ĠBrid get
hn er
eb le
Ġcor ridors
Ġremark ably
arg es
Ġview point
Fran Ã§
ĠSculpt ure
Ġa venue
Ġres urg
ĠRock ies
h ima
Ġbeg ged
uss en
Ġadj unct
Ġtransform s
I ron
ĠBen in
ĠC raft
Ġdis ple
Ġstr angers
Ġemb ank
p ubl
ĠCec ilia
ĠR ory
ĠHel m
ĠBrew ers
ĠTall inn
ĠHarm on
ĠR in
Ġproject ions
Ġles ions
Ġcomprom ised
ĠEl ijah
C ard
Ġs q
Ġcentral ized
Ġg or
Ġgl ider
Ġer ection
âĢĿ )
t ons
ĠOrt iz
am ong
Ġe book
Ġserv iced
ĠHol m
ĠHead s
Ġregiment al
ist o
ĠZ IP
ĠLab s
ĠBen ch
ou ched
Ġreg eneration
ĠPro te
ĠMic hele
Ġw rought
ĠLind sey
ĠResear chers
Ġtrans missions
Ġaccount ant
Ġstim ulation
Ġgentle men
Ġlocal ized
ĠGreg g
Ġneut ron
Ġscript ed
Ġassess ments
ĠAdv ancement
ĠTyp ical
ĠCrow ley
Ġclar ified
Ġt ents
aus en
Ä« n
ean or
ĠFram ework
Ġsp ike
Ġyield ing
Ġexhib iting
Ġintent ional
Ġd ough
ĠF eb
Ġprop osing
o gh
Ġs ubl
Ġv ener
Ġkind ness
r one
in ov
ĠStam ford
Ġvine yards
ĠSam son
ĠLind en
ĠC avan
j am
ĠW ish
ĠTunis ian
ĠMcKin ley
Ġd ownt
ĠC Ã©s
ĠCouncill or
t echn
new s
d ance
ĠSp in
ĠBat on
ĠB ok
Ġ3 30
ĠTurk ic
Ġexecut ions
Ġr ag
ĠSher wood
qu i
yl ene
Ġassign s
h ag
Ġvic ious
ĠCull en
Ġ14 3
Ġst or
arn ey
Ġbroad casters
ĠSl ade
ĠC orey
Ġrem edy
ĠRit chie
B all
ut ive
ween ey
Ġprogram mer
ĠHaw ke
ĠInf rastructure
Ġs cler
Ġmel an
Ġbro od
ĠW ÅĤ
ane ously
ĠQu ay
opter a
Ġconv ict
ĠM MA
ph i
Ġty phoon
C are
last ing
Ġexc elled
ĠTex ans
Ġabduct ed
Ġbet ting
Ġordin ance
ĠTit us
Br ide
or c
Ġfasc inated
Ġpress es
ĠCrus aders
Ġguess ed
P E
Ġsoc ietal
Ġprohib it
ĠDin amo
Ġt we
Ġredund ant
Ġaff luent
part isan
ĠSw ami
iy ya
ĠC ream
ĠP L
Ġground water
Ġas piring
ĠC in
Le on
Ġtop ography
Ġrot ated
Ġbicy cles
hi ro
Ġvent ral
Ġcl ashed
Ġche ating
Ġbi ographies
Ġprotest ing
he avy
ĠThe o
ess ive
equ ipped
Ġdeport ation
ĠF ou
ĠAl ber
190 8
v ings
et own
Ġpolic emen
ĠM andy
ask i
ĠMel ville
Ġant ip
Ġsales man
ĠS G
ent a
ĠM K
ĠNov gorod
Ġunit ary
ĠGar field
Ġphylogen etic
ĠCov enant
Ġfoli age
eng a
ĠPerson nel
Ġp hy
Ġmodern ist
ĠCl aim
Ġclergy man
Ġwas ted
Äģ h
Ġunl ocked
ĠPat el
ĠAg g
ĠDest iny
Ġst aunch
Ġprop elled
Ġcost ing
ĠBurn ley
he x
Ġf ir
Ġo ceans
ĠS overe
ĠF og
Ġinj uring
Ġbound s
O b
il ings
ri ous
ian us
Ġad missions
Ġfest ivities
omencl ature
Ġl ure
Ġdeg ener
ĠR is
Ġlegisl ators
ĠJun iors
un ting
anc ements
Ġcr ab
re b
Ġr anc
ĠØ§ ÙĦ
R on
en as
ĠAdri atic
Ãª n
ĠSh Åį
ĠS art
tle y
Ġshort listed
red it
alt a
ĠÐ °
ĠA man
ĠNGO s
em oration
rib ly
Ġphys iology
Ġrespect able
p ically
Ġfull back
ĠBarthol omew
ĠCent ro
Ġcomfort ably
Ġconf inement
Ġer oded
ro phy
ĠM erry
isl ava
ĠBay lor
ground s
ĠUn known
ĠMater ials
ĠHenri etta
Ġfrig ates
ĠE ither
Ġsimpl est
nort heast
Ġn autical
est ra
Ġcomp ares
Ġub iquit
Ġto pp
Ġco ats
ĠAub rey
Ġh ats
ĠD iaz
ĠG ig
Ġattend ant
u idae
ĠGÃ³ mez
lit tle
ĠHein z
Ġlag oon
Ġp ounding
ĠE D
Ġmet amorph
Ġfier c
ĠLuc ius
Ġbr anched
Ġ15 6
ĠEgypt ians
Ġv ascular
Ġpit chers
Ġgren ades
ĠMag net
Ġden ies
ĠCost ello
M om
de ath
Ġgreet ing
Ġb arge
ĠWe imar
In f
Ġin eligible
Ġcomm ended
Ġhe iress
oph ile
eph al
hel p
equ ivalent
ĠPad res
F rid
B rian
Ġampl itude
ĠNok ia
Ġdistinct ly
Ġpenc il
ĠT ep
man ned
Ġinsp ir
Ġensl aved
somet hing
Ġch rist
iet z
ĠBen fica
ĠCon vent
ĠJak ob
av as
Ġsw amps
ĠS ans
ate urs
ry l
ĠTr ading
Ġcomment aries
ĠL ach
ib re
Ġar tef
Ġg raffiti
Ġcab ins
Ġhook ed
Ġharvest ing
Ġstore y
ĠNap ier
ĠWire less
S ay
Ġcomm encement
Ġconstruct ions
ĠSustain able
Ġb is
ion ic
Ev ents
Ġlab s
Ġbour geois
w ire
ĠHom estead
ĠG ou
Ġtreas ury
ĠK ou
Ġ16 40
ĠBia ÅĤ
en ade
Ġindustrial ist
Ġship wreck
ĠAnat olia
uz a
ĠDal mat
Äį iÄĩ
P O
ĠKnow ing
1 17
ĠP add
ĠM ith
Ġbe ads
Ġun author
Ġchronic le
Ġre issue
ĠGr ims
c ke
ĠDirect ed
ĠAmÃ© rica
Ġeconom ists
Ġevac uate
Ġguarant ees
ino le
Ġins ec
ĠShar pe
ĠBAF TA
ĠK ins
Ġab dominal
Ġund es
ĠProvinc es
Ġlob es
ĠRen ew
Ġcommod ities
ach o
sc ored
Ġmanip ulated
t to
Ġb ob
ĠZ ac
ĠFam ilies
n ity
Ġmod elled
Ġvi aduct
Ġg lands
c re
angel o
ĠA BA
Ġout going
Ġclass mates
ib ar
eb an
ĠCre ed
ĠDix ie
E B
ĠJ T
Ġrel aun
ĠSe ab
ĠMcC le
am ide
Ġfl oral
ĠAud rey
Ġ Ñģ
Ġro ses
ĠLe aving
ĠHealth care
iov ascular
is ÅĤaw
Count ry
Ġstain less
Ġl inem
ĠLe ver
H or
ĠS alford
ĠB ust
ĠN os
Ġrec ounted
Ġstake holders
Ġtoile ts
st een
Ġsh iny
ail le
ĠFre eway
ult z
Ġwedd ings
Ġmet aphys
opol itan
ip ment
St ill
ĠQu entin
Ġarbit ration
ĠWent worth
ĠCaf Ã©
J eff
k oviÄĩ
ver ages
ĠEn forcement
ĠAF B
ĠG ron
ag na
se eded
ĠV ass
Ġcontrast s
se par
Ġtr acts
ĠNow adays
ic hen
ĠCollect ive
Ġsch ooner
Ġsens ing
ĠCommand ant
ĠLj ubl
ĠG raph
Ġbu oy
ĠPet it
Ġfort ification
re nd
ut ra
ĠSp arks
German y
ĠInstit utes
ĠJ ad
Ġk ay
Ġpost ure
ĠDen ise
ĠD Ã©
Ġsp heres
ĠBe aux
Ġpred ator
ĠOl son
? ".
ig raphy
ĠPro bably
Ġhang ar
ush ima
ĠO ll
Ġcor related
N H
ĠH omes
ĠJ ard
ĠGlad stone
ul ence
ĠWood stock
f requ
Ġn ail
ĠH atch
ĠBo om
Ġleng then
ĠP adu
th reat
ĠJew el
ĠA H
ĠChe f
ĠBourn emouth
k g
Ġnarrow er
Ġsynthes ized
ĠProper ties
we i
Ġreject ing
dep th
Ġpopul ace
ĠP avel
Ġreal ises
Sec ret
v ard
Ġoper atic
Ġaristocr acy
ĠJ ungle
Ġr ansom
ĠK af
Ġwid owed
Ġp ots
con c
ĠB iz
ĠSh ooting
ĠZ em
ĠRock ets
ĠGood win
uch s
190 2
ĠPap al
Âł Âł
Ġflu ids
B urn
ĠT ull
ĠAr un
Ġjew ellery
z ie
Ġm ounds
Ġexceed s
ĠIndividual s
à ª
Ġus ur
ano oga
ĠGard iner
ĠPain ting
ĠSen eca
ĠWil ly
Ġn i
Ġadjust ment
>* </
Ġexpress way
ĠW ally
Ġabandon ment
Ġapart heid
ĠDiv inity
Ġsuspic ions
k l
ĠB unny
Ġborough s
Ġfals ely
ĠGray son
eld a
ĠHend rix
Ġcomp ilations
Ġignor ance
Ġhuman ities
ag ua
Ġcell ar
Ġshr ines
ug awa
Ab out
Ġeject ed
Ġ15 1
Ġskept ical
Ġf ists
Ġre ins
Ġor ator
b uster
ĠS is
ĠS od
ĠQ uit
p ies
ĠCr aven
ĠKat y
ĠTel angana
ĠSt ruct
10 7
ĠJud ges
Sc ience
Ġtornado es
ac hen
ĠAl one
lect ric
ient e
Ġpoll en
Ġrec ons
ĠOr k
lit re
P F
ĠP oul
Ġring ing
ĠFif ty
ĠK ed
Austral ia
Ġcor pus
Ġpropag ation
ĠP is
g rossing
l itz
erv a
ĠCou gars
ĠAlg iers
Ġver ify
ĠMans on
ĠM atter
Ġexhaust ion
Ġinter sp
b ir
y ah
or ations
O d
ubl ics
Ġfield ing
Ġ é
U B
Ġpair ing
ht ar
Ġsp a
Ġcrit erion
i enced
A tt
Ġst ark
ĠE str
Ġweaken ing
Ġpre face
ik awa
Ġaspir ations
S ullivan
Ġsk ip
ĠE manuel
Ġsm ashed
arri o
ĠSun s
Ġo k
Ġs age
Ġhus bands
Ġbr ains
Ġobs essed
Ġoptim ization
f ell
ĠdÃ© but
ĠG ers
Ġsl apped
oh l
ur istic
Ġed ible
burn e
190 7
Ġzomb ie
Ġme adows
.. ..
N BA
ĠExt reme
ĠVo j
Ġexclud e
ĠCast illo
ĠRos enberg
Ġfeas ible
ĠWeap ons
ĠB rug
ĠPar an
ĠBurg undy
ac ion
ĠCh Ã¡
onna issance
Ġma ize
ĠM ighty
ĠDoll ar
l ost
erm en
Ġinteract ing
ĠM ers
ĠY eah
acc ording
ĠGonz alez
19 16
ĠCooper ative
ĠSiem ens
Ġr pm
ĠInter continental
ĠFound er
ĠT avern
Ġdoctr ines
Ġgrass es
ĠTusc any
Ġaccompan iment
oster one
M edia
ĠHe il
ĠBab yl
reg n
it ta
hed ron
ĠBo ise
ĠRoth schild
Ġ0 8
ĠDVD s
Ġnewsc asts
Ġin exper
ĠA al
ĠLe iden
icol or
R oad
ell idae
ĠFor g
Ġmedic ines
ĠChrist i
Ġey ew
ĠAM C
ĠCarth age
ĠApplic ations
Ġsup ple
ĠCor al
ĠInn ocent
Ġa ka
ro bin
ĠT ito
Ġstress es
ĠTele com
M aria
Ġun int
Ġ14 8
in ja
ab r
ĠCl ock
ĠNav arre
d yn
Ġbe verages
ind ependent
Ġmin t
ici encies
190 3
pl at
ĠChin atown
ĠD aughter
if ference
Ġparad igm
Î Ń
ĠN AA
D ar
Ġle mon
ro k
Ġcred entials
F all
ĠS ot
ĠFe el
Ġanalog ue
Ġun cont
ĠWh ites
ĠÄ Ģ
D iv
Ġapp rehend
oth s
m ixed
In s
ĠRud y
ĠD omen
ĠN ant
Ġposition ing
ac an
ĠSil k
Ġdiscl osure
ĠCh ing
Ġcal iph
w orm
ans son
Ġbar b
Ã¢t re
val ier
Ġmemorial s
Ġabbrev iation
ĠBY U
ĠL ORD
hes es
Ġchar coal
Ġske letal
Ġpos es
Ġvig orous
ĠB AS
Ġpos ing
Ġcand les
Ġbond ing
ĠAl co
Ġtrans itions
Ġadvis ors
sim ilar
ĠT ipp
el ot
ank ing
ĠT z
ĠG upta
Ġantib odies
Ġsyll ables
sk aya
St an
ĠSlov ene
Ġprofess orship
Ġfro st
Ġenjoy ment
Ġdoll s
Âł II
Ġ13 9
ĠC ous
ĠRe iss
Ġwet land
t im
ĠL enny
Ġr ift
Ġsp aced
l est
et ted
Ġsuccess ively
In side
ĠHollow ay
Ġwerew olf
ĠF AA
ind le
ĠMah m
M oon
ĠN ec
ĠWild er
Ġserm ons
Ġnost alg
Ġinv asions
ĠSl im
Ġaest hetics
ac ruz
ĠEz ra
Ġnot ions
Ġover run
ros is
P ok
ĠViol ence
Ġequ estrian
Ġmanufact ures
Ġhop eless
ĠHern Ã¡ndez
Ġkn e
ic ent
ĠTem pl
isc us
ĠNew town
Ġcar penter
Ġquestion able
esh oe
H aw
ĠSe qu
rough s
ps ych
ĠCor rection
ĠOcc asionally
ĠSyl vester
ĠMar guer
ĠS ack
h anna
Ġcl own
Ġind ec
erm ont
ind ex
ĠHew itt
ĠK ale
Ġrep atri
Ġge ologist
ĠNat al
R ain
Ġban ana
Ġstim ulate
ĠL acey
Ġimp over
Ġbus hes
Ġmust ered
alle l
ĠPy ramid
Ġver ge
ĠFather s
osynt hesis
ĠV ance
ĠBr igham
Ġpan or
ĠBott om
H old
ĠR ij
press ure
Ġmitochond rial
Ġunp aid
ress ions
Ġorn ith
Ġmatric es
Ġst ag
app ointed
10 9
Ġmorph ological
ĠM asc
v at
eng ined
aff er
ĠPy thon
ĠTrent on
ĠCrus ade
ĠPres cott
Ġgal axies
Ġcauc us
ĠP anc
ĠR olf
Ġhom olog
Ġ0 9
ĠRich ter
ĠTele communications
Ġiv ory
ĠPtole my
Ġost ens
ĠG ud
ag awa
ĠE T
ĠCorp us
Ġdecomp osition
Ġind ist
ĠCar acas
hel ial
ĠM itt
Ġcontract ion
c ation
Ġp ity
Ġal oud
ĠDeport ivo
Ġdisapp earing
ĠChester field
ĠDuff y
ill usion
ĠSe ine
Ġbeg ging
ic able
ĠD aim
ĠPont ifical
M aur
Ġ17 40
Ġtermin ating
190 9
Ġwars hip
Ġexpl orers
app ro
Ġinject ed
ĠTh ought
Ġdisc om
ĠGl over
1 14
Ġco ated
Ġauthor ization
Ġcle ans
Ġcompat ibility
ol ese
Ġfl aws
izz ie
as ar
ĠSt raw
P sych
n atural
h ong
Ġhe aled
Ġtre acher
Ġh illy
ĠS ick
ĠWill s
CA P
Ġm umbled
Ġkidn ap
Ġme adow
Ġann ot
omin ium
Ġcow boy
Ġsystem atically
Ġcontroll ers
Enter prise
F ox
n itz
Ġconv ection
and es
ĠFrank s
Ġsh aping
ĠEl ton
Ġbas alt
Ġw aving
ĠT bilisi
ĠK ast
ag os
Ġmic rowave
Ġsp ies
ĠMcC ull
v all
ĠBeck ett
ĠFr is
R ad
ĠS Ã¡
ĠIn form
ide on
Ġdiplom ats
B on
ĠDe af
ĠBay er
Ġfix ing
Ġcart ridges
Ġstere oty
Mr s
olution ary
Ġclim ates
ĠArc ade
abl anca
Ġball istic
Ġintegr ating
Ġdescend s
Ġgar ment
ĠD ancing
Ġvers atile
ĠBeck y
ĠShip yard
ĠGodd ard
Ġw ander
ĠF iona
ĠSp urs
ĠJud iciary
in is
ac s
ĠK T
ĠDe acon
Ġf ade
ĠT ung
Ġfram ing
_ .
k am
Ġdist raction
ĠFl o
ĠS end
Ġre aff
ĠR are
Ġman ners
ĠBe ec
ĠSant ana
Ġ15 3
L at
ĠR oot
ov i
Ġinverte brates
Ġsculpt ed
Ġdiscour aged
m ilitary
Ġcirc ulating
Gu ard
Ġvibr ation
Ð ³
Ġow l
Ġnom adic
ĠD omesday
ĠPeng uins
Ġwand ered
Ã¤ l
Ġp act
Ġl ugg
ĠN il
ĠK erman
ĠG rap
Ġnomin ate
Ġnucle i
Ġesp ionage
re k
ol ta
ĠY oga
ab ase
ar er
R aj
ĠN ippon
ĠKir ch
B s
A BC
id ic
ĠDec ree
ĠDam ian
Ġk inetic
d h
y as
Ġbi ologist
ĠWin ters
Ġbe verage
Ġsour ced
ĠN DP
Ġocc ult
Ġgen uinely
ĠLjubl jana
W D
Ġpulmon ary
ob b
Ġcinem atic
Ġo h
Ġm are
ĠGda ÅĦsk
ĠHouse hold
Ġce ilings
Ġillustr ates
Ġpe ered
ĠRec onnaissance
ĠK are
br ids
ĠKh alid
ĠRecord ed
ĠD ove
ass in
Ġmurder ing
Cl ub
Ġeng ages
ĠDim itri
ĠGlam organ
O p
ĠP act
ĠEx amin
ĠH ask
Ġgr aded
Ġport ico
ĠLe high
Ġresurrect ed
tradition al
ER S
ĠO re
Ġc ush
Ġcon ical
Ġconcur rency
Ġsymmet rical
Ġp umped
ĠHot els
ĠM ister
Ġop ined
B ah
F air
ĠSil icon
Ġwithdraw ing
S ky
ĠM ank
ĠP yr
Ġ16 8
ĠPut nam
Ġconglomer ate
j ug
p ell
Ġste amed
spec ified
ĠÃ İ
ĠGot henburg
Ġgol fer
l iber
ig arh
br inging
Ġlabor ers
Ġped ag
Ġunp redict
ĠThor pe
ĠD habi
ĠMell on
Ġren aming
omorph ism
G roup
ĠK ilda
ĠZ eb
Ġsl alom
Ġtechn icians
ĠVol vo
Ġpav ement
Ġp ony
ĠOr din
18 90
Be fore
N ext
ap at
Âł 12
ĠLe f
app iness
ĠDr ivers
ĠVent ura
Ġchore ographed
pl aces
Ġtroph ies
y uan
ĠRes idence
Ġpurs u
Ġmiser able
Ġre claimed
rit o
ĠBe z
ĠMÃ© xico
ĠDoct ors
Ġc ues
F ilm
f ashion
Ġimp art
ĠPam ela
ĠT od
ĠJan ata
Ġf ief
ĠH O
ĠG aw
ec oming
ĠZ u
ĠMajor ity
Ġcomm ence
ĠConn ection
l ove
k ur
ĠSte iner
ĠGall oway
Ġinadvert ently
Ġpol lin
Ġrefurb ishment
ĠL isted
Ġslee ves
el iness
ĠJ od
man ager
Ġdep leted
Ġwor ries
ĠGab on
T ales
ĠRam on
Ġhang s
ĠHary ana
ĠFem ales
ĠHom eland
ĠMurd och
al most
k il
ĠD iesel
P rom
ĠInst agram
Ġtrav ellers
j Ã¶
ĠAd olph
Ġarrang er
Ġhe y
ĠAff air
Baptist e
Ġfle es
Ġdown hill
Ġassemb le
ĠY uc
Ġenc ro
ĠTor re
Ġemphas izing
ĠNoct uidae
ĠM ard
ĠJ Ã³
Ġsmooth ly
Ġrecycl ed
ub i
Ġt ant
Ġgoals c
Ġwhor ls
I O
Å £
ĠK uz
Ġstir red
Ġpour ing
en f
ĠC ater
Ã© rie
Ġcred itors
Ġphosph ory
ĠC L
Ġimp lements
Ġk h
ĠWarn ing
ĠVarg as
C op
im oto
ĠP apers
Ġgoal tender
Ġrain bow
ĠRuf us
Ġresid ual
ĠHar ald
Ġban quet
ĠTolk ien
Ġbe que
Ġend owment
ĠSim ple
ĠCre ation
ud o
P oly
ĠD rop
P T
aus ible
Ġspiritual ity
ĠS AS
Ġr idden
hen e
ĠAir field
Ġorch ards
aza ar
ĠT arr
ĠRac eway
old er
stit uted
Ġdeep est
ĠPol ar
ĠP oo
Ġde acon
Ġrob bed
ĠF uel
Ġcl ust
ĠWex ford
Ġex ert
ustom ed
Ġoccup ations
Ġrob otic
ĠJa ime
ĠM Ã¶
ĠTre asure
Ġl ays
ell us
Ġins ulin
Ġhonest ly
E xt
ĠL ena
ĠE urasian
ĠO ng
Ġimag in
ĠSm ok
ĠJam al
Ġt earing
ĠG add
Ġcharacter ization
ano i
ĠKurd istan
ĠQ ian
Ġdevot ees
Ġun pleasant
Ġgl are
ern sey
ĠMil ford
Ġpen ultimate
ĠDick son
Ġconn ector
ĠInver ness
ĠCoch rane
B ab
Ġbarr age
M ass
le a
ĠS eng
ĠR ih
ĠD ora
Ġsl ipping
ĠSur viv
) âĢĶ
ĠD irty
Ġsar cast
Ġconver gence
ĠCycl ing
Ġdifferent iated
ĠPrinc es
Ġanthrop ologist
ĠT Åį
ĠCon fess
ĠMarl borough
j ans
s oc
ĠClem son
Ġ17 68
Ġlou der
v on
Å ı
P enn
Ġep ist
Ð½ Ð°
ĠMoin es
Ġregul ator
ĠG C
ĠN d
ĠVal uable
ĠMart yr
ĠGuadal ajara
ic um
ĠH ald
Ġp ills
Ġattend s
. /
ĠR uff
Ġsm elled
kh az
K at
ell ant
Ġprop onents
w old
Ġfib re
Ġfresco es
ĠI M
Ġstraight ened
Ġdict ator
c od
w ari
us ks
ĠB O
Ġal right
pron ounced
ro of
old ed
Ġtransform ations
ĠBullet in
b ush
ĠMor g
Ġapp ra
Ġresign ing
Ġacceler ate
ĠHay ward
ĠDe utsch
aly a
Ġconstitu ents
Ġl ace
ub an
ĠGu iana
ĠDr ac
ĠJ ae
h az
Ġin expensive
us ha
Ġstates man
Ġconsolid ate
Ġc yn
ĠSt ations
Ġrob ber
Ð ±
ĠS ne
ow an
ĠG raf
Ġey ed
ĠB ett
Ġatt ic
ol ian
ĠB anc
ĠX uan
Cal ifornia
irc hen
Ġpurs uits
ĠG ender
ant ile
osp els
ĠEnd owment
Sc ot
Ġid iot
Ġdiscip linary
pe ace
ĠAtlant is
Ê ¼
ĠV itt
aur a
ĠAz iz
Ġincomp et
Ġdev ote
C ha
Ġlin en
ĠNat asha
Ġconject ure
Ġhospital ized
Ġo ven
ĠN ied
ĠN ex
Ġnomin ally
ĠCro ix
Ġstyl istic
ĠSoci ology
3 20
m ong
ĠD orn
up o
col oured
Ġnut rit
Ġincarcer ated
Ġincl ination
ĠConsort ium
an agan
Ġj unk
Ġcur ling
Ġsegreg ated
ph ase
Ġrad ios
ĠDJ s
in ition
lin ers
ĠU mb
Ġsurvey ing
om ar
ĠJ em
br ate
ĠConn olly
ĠR ings
ĠD all
ĠSp iel
Ġexpl ode
Ant on
uc alypt
Ġroy alties
Ġ| |
ĠChatt anooga
ĠW eld
ect ar
ĠBo is
Ġev icted
ĠMot own
Ġhaz ards
odynam ics
Ġe igen
ĠBe ard
ĠSub urb
an um
Ġ16 50
ract ive
Ġfoot path
ĠAk ron
Ġcow ard
ĠDion ys
Ġdec eption
Ġsystem ic
Ġwild ly
Ġpropri etor
Ġc ares
ĠRegard less
M ania
ĠD eng
Ġunderw orld
Ġc ounters
ĠMed ici
ĠA uth
Ġdist ortion
ĠHen ley
un its
cl ad
itch ing
t ub
Ġth ieves
ĠP oker
ist ocene
ĠFre iburg
s ides
por ter
ĠGill esp
es ity
ĠG areth
Ġun ic
Ġref inery
Ġrev is
ĠBurk ina
Ġwater col
ĠFall on
ugs burg
Ġencompass ed
ĠSic ilian
ĠC erem
ĠGeomet ridae
br as
lyss es
ĠZepp elin
ĠMembers hip
Ġresid ue
Ġlos er
r ational
190 1
Ġtreas ures
Ġcl ocks
Ġcar vings
ĠAl vin
ĠProfess ion
Ġcha otic
ĠC aus
Ġaut ism
ĠAdd ison
ĠRow e
Ġtrail ers
roc ÅĤaw
vo iced
Ġt ighter
Ġvirt ues
def ense
Ã¦ r
Ġeth anol
Ġpack aged
Ġgramm atical
Ġd ile
arl ane
ĠRe ality
ĠGu z
Ġinsp ected
ĠB oca
ĠHam mers
ĠDef ensive
190 6
Ġsh ri
oph obia
Ġun inter
ng th
Ġaltern atively
Ġp rick
Ġwall ed
ĠSt acey
ĠMat te
oth o
illa ume
Ġcompl aining
Ġbath ing
á¹ £
ĠThessalon iki
Ġfollow er
ĠMarguer ite
A w
roc hem
ĠCumm ings
Ġlim itation
Ġresur rection
bridges hire
Ġsl ap
ĠOk ay
ĠS per
Ġcoll ier
Ġchap els
ent ies
ĠBotan ical
ĠV H
ĠLi Ã¨ge
ris k
ĠP ound
Ġtw inned
ĠH ue
ĠD ucks
ĠSt ick
Ġrest art
Ġmultip lex
Ã± ez
ĠHart ley
p g
ĠThe at
ĠK R
Ġaud itions
ĠSA T
ĠBl itz
Ġsal on
ĠThir teen
Ġfl ush
Ġinstall ing
ĠJacqu eline
G a
Ġrec omb
ĠOrgan izations
Ã¼r k
Ġen forc
Ġrun ways
ĠEqu al
ĠInstit ut
usch witz
Ġ17 73
Ġinvent ions
Ġflash ing
ĠReb els
ĠN and
ĠShip building
at ility
Ġp estic
ĠPent agon
Ġw orms
Ġsucceed s
forest ation
ĠS ole
Ġdisc ography
Ġ11 00
ĠG ast
Ġcar ic
Ġdiss olve
ĠPass age
ĠStat us
ĠG rowing
M ike
ĠF avor
iv as
form ers
ĠT ing
rÃ© al
ĠB ala
ĠD ae
ĠCath y
ĠSadd am
ad ministr
ĠV ital
Ġsinc er
Ġrelaun ched
D H
ott est
ĠBet hel
Ġs ip
ĠCelt ics
Ġcapt ives
Ġr ude
ĠH ath
n ets
Ġbook ing
D ep
Ġj og
ĠWar rington
Sp ot
Ġc ath
Äģ l
ĠGillesp ie
Âł years
yl a
Ġant agon
Ġso ber
Ġ15 4
sk ie
Ġairfield s
Ġ ç
ĠAs he
Ġbody guard
Ġdebut ing
ache v
ĠSerge y
ĠBer wick
ĠSudan ese
Ġmush room
ĠHar row
Ġworship ped
r ils
ĠE un
ĠPhys icians
Î¿ Î½
H an
ĠC en
ason ic
ĠBe ech
Ġnovel ty
Ġfulf illing
access ible
t is
roy o
ĠMas sey
Ġleft ist
ph s
Ġinf ancy
ĠPort rait
ĠDam n
Ø ¨
ro ft
Ġadequ ately
ĠEast on
ĠIn quiry
Ġam ple
Ġpres cription
Ġwid ening
Ġhook s
Ġl ately
ient o
sted t
ĠYoko hama
k ens
Ġsh rimp
ĠSan ford
pro ducing
ĠSalv ation
Ġe co
ĠArch ipelago
ĠHur on
Ġcl and
Ã©l ix
Ġdetect ives
Ġvoy ages
ĠJar vis
S M
he i
ato ire
ci Ã³n
ĠHandic ap
W ow
ic idal
ĠThe ore
ĠAt kins
Ġship ments
Ġpass ports
vel le
Ġdam ned
p ad
Ġun just
Ġf ury
omet ers
Ġground breaking
Ġmap le
S L
Ġfuel ed
Ġillness es
ĠRhe in
ĠAr gy
ĠZ omb
uk ary
Ġfl anks
Ġenjoy able
Ġstre amed
ra i
ĠOn es
Ġinf lict
Ġunreli able
ĠH umber
ers en
ĠLaus anne
k us
ĠB ere
ĠSz cz
Ġbak ery
ĠT ail
Ġtechn ician
Ġse pt
Ġsediment ary
ather ing
Ġrall ied
Ġaer ospace
ĠCru ise
ĠR ite
Ġsuprem acy
Ġmun itions
ĠJ avan
so hn
ĠWil kins
ĠLou ie
ĠMand al
Ġsacrific ed
in ence
ĠP ern
per fect
ball s
ĠHay nes
Ġman oeuv
Ġtimet able
uth an
ĠOr ton
ĠAbd el
grand son
ĠBr agg
ĠN SA
ĠSh aun
ĠLic ense
Ġo un
ĠSa igon
ĠNeh ru
2 20
S ab
ĠF ars
bre cht
Ġp ets
ĠN ie
ĠCh ao
Ġoff ended
ĠFriend ship
Ġnewcom er
Ġconf irms
inf luenced
Ġfo am
ĠY unnan
ĠRec e
Ġstreet car
Ġv iz
Ġarr ondissement
Ġfe eder
ĠRe ference
hy de
U E
ĠB land
prim ary
a ques
h ift
in cess
ant y
Ġhigh lands
ĠBian ca
t Ã©
ĠCh itt
Ġsidew ays
Ġpro ton
cl ave
ĠGold smith
vis ible
ĠB ose
Ġham lets
ew ard
ĠBall ard
os in
ĠS AR
ĠM olecular
ch oice
ĠG ala
Ġcl inched
ĠÃ ļ
Ġreg imes
Ã´ me
Ġblend ed
ĠI w
Ġ16 2
Ġreun ite
ĠSynd icate
Ġs ue
Ġbed rooms
ĠMort imer
Ġstyl ized
ĠCambod ian
ĠChÃ¡ vez
Ġrel ativity
ĠEqu ity
Ġnavig ate
Ġcruel ty
tr ain
ĠBeh avior
rep air
Ġde i
ĠRam an
ĠColl abor
Ġincap able
r ill
Ġdisp osed
ĠSh ank
Ġcre ations
Ġref rain
ĠCo imb
ĠTob acco
Ġevident ly
Frid ay
Ġsat ir
us o
ĠN og
imb a
ĠNav ajo
ĠE min
ĠBro dy
ĠEn lightenment
ĠX iang
Ġs ocks
ĠM M
Ġinhib ition
Ġref uel
Ġbroad band
ĠCam bridgeshire
190 4
Ġrebell ious
Ch ris
ĠBarn ard
Ġshel ves
Ġcommun icating
ĠL ola
Ġmag ician
Ġb unker
ir led
ĠIn ns
C orn
à ¶
Ġacadem ia
Ġw aking
ĠRe ason
K am
ĠK ats
aut ics
ĠBang or
ĠHe zb
Ġdownload ed
ĠScient ology
ĠGem ini
Ġassert ion
ĠO C
ĠSoc ieties
Ġreg istr
ĠC V
Ġ20 2
ary l
ĠV arsity
Ġsw ap
ĠVer di
Ġbrew ing
Ġout lines
C ry
Ġm alf
Ġch amp
uck le
Ġaccus ation
Ġpolic ing
it ans
Ġb enches
Ġ" *
Ġsub unit
ĠSa ar
iest a
Ġh ath
ĠT ash
ĠFl otilla
ĠCinem at
å į
oc ar
ĠRo an
ĠTy phoon
Ġthen ce
top las
Ġdrag ging
ogl ob
ĠKras n
Ġtraj ectory
Ġc erv
ĠNor wood
ĠI DF
ĠEx ternal
Ġlod ged
Ġf ishes
Ġb outs
ce p
Ġwh im
ĠTre es
ĠMac intosh
Ġl obe
Ġen v
ĠHigh ways
S cript
ĠS op
aceut icals
ĠF ortun
Ġ14 9
A T
s em
uk ov
Ġtransl ating
Ġlingu ist
ĠAng lia
Ar m
avel in
I B
ĠH ust
ĠEle phant
ĠL aser
Ġunse en
w ark
Ġbelong ings
ĠS ites
Ġmines we
Ġreorgan isation
Ġlabour ers
Ġsm ir
Ġinhib itor
k Ã¶
ĠC aj
Ġgen ital
C DP
Ġball room
Ġmarsh al
Ġunin habited
ric hed
re is
ĠG aga
Ġge ared
Ġuncon ventional
ĠAndr Ã©s
com pet
ĠF ighters
S imon
Ġn ets
ĠV ive
ma res
Ġw edge
tem po
Ġd ove
ĠTurb o
t ab
ĠH ier
pr udence
ĠMor ley
Ġkilomet re
Ġobserv es
cl osure
ĠStat en
Ġweapon ry
or ra
and als
ĠNov i
ĠReg ulations
ĠBatt les
ĠM anny
ĠRed e
ĠTrans fer
ĠLe ib
ĠWar fare
L iving
M ot
Ġsl ang
fl at
ĠBurg er
ek w
Ġtoler ate
ro cess
ĠMe iji
c ian
l iness
ĠK ham
Ġend ure
ĠU ral
ĠMontenegr in
ĠN ero
ĠSt ores
Ġfasc ist
ĠQuest ion
he rently
ile ver
Ġdiet ary
Ġt ect
Ġanth ologies
agg io
ap id
Ġsent iments
Ġpers ist
Ġmanifest o
l au
ver ted
ĠBr ide
Ġadv ises
Ġ25 6
Ġafford ed
Ġmer its
Ġware houses
ĠIss ue
k ai
ĠD ip
Ġviol ate
ol and
ber ries
Ġ17 69
ul k
sh aft
oph ila
met hyl
ames h
ĠP ell
ĠG MA
arg ing
Ġprivat ization
end ation
Ġ15 8
Ġins ist
ĠComp rehensive
Ġsound tracks
Ġhast ily
Wal ter
ĠAm iga
Ġplot ting
Ġdorm itory
× ķ
ĠR agh
ĠCor respond
Ġconc erto
W a
o ire
ĠMason ic
ĠCasc ade
Ġlobb ied
Ġvar iance
ĠOr chard
Ġlik ing
R ub
Ġp urg
Ġbl ot
Ġarch ival
Ġimpat ient
ĠEre bidae
R ose
Ġar son
Ġam ber
Ġtens or
ĠCast ell
aid a
p u
Ġcomp iler
ĠUn ix
Û Į
ĠF X
ĠPal azzo
Ġsn iper
ĠE X
Ġsm el
ĠItalian ate
id os
anc k
Ġexperiment ing
Ġp ubs
Ġfilm making
Ġmir ac
ĠBomb ardment
t one
ĠL viv
oc arp
p ieces
Ġn ause
Ġpol ite
app roximately
Ġsqu ash
Ġpale ont
Step hen
Ġg n
ĠK v
ĠSir ius
Ġanalog y
ĠSe lection
Ġcool ed
Ġship ment
ĠSy riac
Ġautom ation
ĠSomet ime
Ġindict ment
p aper
Ġper ished
ĠLib re
Ġlyric ist
f ighting
ĠOs man
Ġrepet itive
viol ent
el ines
ah s
ĠPo et
Ġwood lands
j av
ĠC rem
Ã¼ hrer
ĠEqu ality
ĠIroqu ois
S ongs
ir as
Ġdes erves
ze f
ĠHern andez
Ġstip ulated
Ġwond ers
ĠAg ust
Ġbless ings
ĠA J
Ġfore front
ĠNot ably
ĠVer acruz
L ate
Ġmon o
ĠC airns
Ġrev isions
uc id
em erg
omin ation
ĠRob ot
( '
Ġlig ament
ĠWol ff
Ġfeas ibility
Ġstr ata
ĠBal och
Ġoverwhelming ly
ĠRid g
A U
ĠCh anges
Ġpath ogen
Re ich
Ġcommemor ates
lu k
ĠHa ver
ĠAndre i
ĠR udd
Ġkick off
ort ex
Ġcoordin ating
Qu est
ĠBras il
et ter
Ġback bone
Ġvolcano es
Ġprinc ely
Ġun acceptable
uss ed
Ġsequ els
á¹ Ń
ib or
D s
t itle
Ġst ucco
ir an
ĠBl ank
eng o
ala ure
do ing
Ġcel estial
ĠJ ia
Ġsp ices
ĠIl ly
Ġimpress ions
Ġsc oop
ĠK any
ĠElectric ity
Ġo y
ar ay
Ġcommun ion
cont in
s at
Ġhead lined
ĠAll Ã¢hu
Ġrestr ained
Ġbath s
V ill
Ġatt ire
apo el
ĠConfuc ian
ĠPers ons
ĠVo ices
o ese
ĠN M
a quin
n orm
Bre ak
ĠAg n
Ã¼ k
ĠBrat islava
ĠGrims by
ĠFre ed
ĠCond uct
ont ally
ĠSig ism
ip ot
te es
b ard
ch lor
ĠJ oker
ĠGuard ians
Conn ell
B ir
Ġfl ock
Ġ0 4
ĠCre we
ĠAm azing
Ġpal aces
ĠG ry
Ġconduct ors
ĠMac le
ĠJun o
Ġque ens
ambo at
ĠM CC
s outheast
ĠM X
ĠSh ack
Ġturb ulent
ĠGrac ie
ĠA uschwitz
Ġ15 7
ĠEn emy
ĠSch a
Ġextrav ag
d ark
ĠD ib
C ross
j ong
Ġm ul
Ġv engeance
wa ite
Ġund oubtedly
ĠGr ave
T al
Ġsin ister
Ġcent enary
urd y
Ġatroc ities
m obile
ĠH Ã¤
ĠSus que
Ġpy ram
ĠF ug
ĠW T
h ore
Ġw ipe
3 60
in ers
oc ations
quir ies
Ġthem atic
Ï ĩ
Ġqu iz
ĠWe hrmacht
iy ama
ĠLars en
omm el
Ġp ag
ĠHook er
p ore
is ie
Âł cc
off ice
ĠWhit man
f us
ĠB orders
Ġrel iance
Ġbeaut ifully
Ġprivile ged
N K
Ġdesign ations
ĠMonte video
Ġtrem bling
Ġperce ive
ĠE ber
ri ks
ĠSt ony
ĠRe ady
Ġem perors
Ġparas ite
Ġcaf eteria
ĠJ ord
Ġrest arted
ĠNin ja
ĠV os
à¤ ¿
Ġvertebra e
hes h
Ġfold s
at l
Ġf ading
Ġad here
Ġsec l
com mercial
ĠPart ies
ĠGhana ian
P ublic
ellect ual
ĠCi udad
inn ie
Ġfire arm
onn et
Ġunlaw ful
B ox
in v
ĠV IP
Ġen voy
Ġ @
Ġveter inary
ĠRe ign
Ġpra irie
ĠEm b
1 18
ĠAb khaz
Ġbranch ing
ĠLar son
ĠV r
Ġfict itious
ick i
m embers
ve au
acc alaure
Ġintern ed
ĠHand ball
Ġfiref ighters
ĠSp ence
um ination
Ġgar ments
Ġspars ely
ĠCit adel
ĠW edding
Ġsim ulated
ĠMad d
ĠUl rich
ĠHand el
ĠEqu ipment
ĠCanton ese
p x
ĠF E
ĠCh im
Ġco arse
Ġbl ogs
ce ph
on is
ĠC alled
ĠB K
Ġ3 40
ĠPr ab
S ince
ch us
Ġelev ators
Ġtra itor
Ġimp ulse
ĠFitz roy
Ġbod ily
ĠE ph
Ġheight ened
Z A
Ġd red
ĠR und
ĠMade leine
ĠLe aves
Ġobs ession
Ġsymbol ism
Ġpul pit
Ġsal ts
st ay
ae an
Ġinte gers
B raz
rit es
ĠY in
Ġbr ighter
ĠInc umbent
Ġcum ulative
H ill
Ġpart isans
Ġplay back
ĠAl ta
ĠReg gie
ĠPrepar atory
ĠMalm Ã¶
D eep
ĠKarl s
Ġgast ro
Ġ! [
Ñģ Ðº
ĠCÃ©s ar
w il
ĠScient ist
Ġf ills
Ġgrass roots
Ġtou g
Ġdisp osition
Ġconserv atives
ch ain
ĠAl ton
che ng
Ġresent ment
Ġblack mail
ĠJ ang
ĠK uk
ĠParis ian
ĠWeek s
Ġr iff
ĠK hy
ĠM ous
ĠLy ndon
ĠQuarter ly
Ġp addle
het ti
Ġfant as
Ġcompet ence
ĠRec overy
ĠJournal ists
Ġrot ational
Ġascend ing
at ement
Ġre used
Ġ17 58
L en
Ġstart up
ĠSur f
Ġant id
Ġscreen ings
ĠGar th
Ġrespond ents
FranÃ§ ois
Ġmotion ed
ĠRo z
ĠMcG ee
Ġsemic onductor
ĠKyrgyz stan
Ġdiscom fort
S ac
U h
ak ura
Ġreflect ive
h alt
ĠH ij
Ġout numbered
Ġmaneu vers
al ers
und o
Ġadv ising
ĠBel ieve
Ġsurn ames
ĠBarn sley
it les
ais al
bal ance
Ġre igned
th ose
Ġread iness
Ġdecent ral
Islam ic
ĠAnthrop ology
ĠCyr illic
ĠGetty sburg
z ai
ĠW orship
Ġtr ivial
Ġsol vent
ĠSin h
W as
ĠR AAF
ĠSh il
Ġexp osition
Ġfin ely
Ġwater ways
Ġla uded
ĠTre v
ĠTok ugawa
ĠEmil io
ĠT uf
St ay
k irk
ĠR att
sh ield
Ġst icking
RA M
bur st
Ġconsec ration
ĠAlfred o
Ġbend ing
to x
aj an
ĠScient ists
ort on
Cl oud
Ġ17 20
ib ur
ĠArm ored
Ġentertain ed
ĠCad illac
ĠC out
ĠH ove
Âł 17
Ġob liv
Ġauthor itarian
Ġexecut ing
Ñģ ÑĤ
P ri
t os
ĠB iel
Ġfl ut
Ġoverc rowd
ra ver
c ases
Ġcanc ers
Ġelabor ated
u w
Ġsaw mill
Ġmigr atory
g ling
ĠSum ner
Ġimpover ished
Ġbl oc
Ġser um
Ġimpro ves
M i
ĠP aint
ĠEP s
Ġgest ures
Ġadd ict
Ġsweet heart
Ġweakness es
ĠR oots
ĠAs ylum
Ġdown ed
K en
ĠMatth ias
W T
ĠIn k
Ġcul p
Ġrum ored
ĠPic asso
ĠHear st
t in
qu ay
amb i
Ġbar oque
Ġenh ancing
ĠE clipse
al tern
Ġdirect s
ĠK ush
ĠG aston
ĠKingdom s
Ġir res
Ġl ub
ĠWh arf
ĠMin as
iv ores
ĠMan if
H it
Ġprocure ment
Ġscore less
ar id
Ã© es
Ġsk yl
Ġhyp not
Ġshock ing
Ġsh iver
ĠAl a
ĠBah adur
ogen ous
it ia
as ers
Ġgr inding
Ġem itted
Ġpermit ting
ĠRash id
F E
Ġhur ting
K it
Ġv ines
ĠX L
ĠBut t
our ing
ĠThous ands
ĠC Ã¡
ĠSi ena
voc als
s ets
Ġvol atile
Ġspur red
Ġf airs
Ġcon gen
Ġdecl ines
ĠE tr
at os
Ġcl auses
Ġexpend itures
ĠSach s
ĠÃģ ngel
? )
Ġt aped
nd ish
Ġwrap ping
ĠPho ebe
Ġ17 65
bro oke
des ign
ĠD ress
ĠK ew
Ġher mit
ĠGr ab
Ġrein forcement
Ġp inch
ek ed
ĠQu in
Ġveget arian
Ġfasc inating
Ġb ri
ĠD uty
duct ory
Ġdistribut ors
ĠMind anao
ĠCycl one
Ġnod s
Ġa ux
aster ly
Ġrud der
ĠS ala
ĠH arg
ĠO c
oc l
be am
Ġdivers ified
ĠCic ero
m ult
Ù ĩ
Ġm esh
Ġpre l
ĠBl aine
18 98
ĠEast man
ĠGar ry
host ed
Ġremot ely
ĠAk adem
il an
Ġarch aic
Ġhor rified
Ġstagg ered
nam ents
Ġlux urious
ĠTir ana
ĠB hat
Ġcon g
so ever
hist ory
Ġpet itions
cont ent
cool ed
ar ious
Ġfun nel
ĠPle istocene
ĠTajik istan
ĠF inding
Ġpeace fully
ĠĠ Ġ
ĠRib bon
g od
Ġrace horse
ĠL ent
ĠHusk ies
Ġhead waters
ĠYus uf
ĠSc enic
Ġreact ive
f ood
Ġ il
ĠH in
Ġall otted
ts ch
ĠCan oe
ĠEl gin
Ġwel coming
18 80
ĠLauder dale
H E
Âł G
Ġ8 50
Ġrepl en
ĠTac oma
' ."
Ġdev out
ores cent
ĠH Ã©
ĠP BA
ĠRe ally
ĠHam id
Ġchest nut
ĠPar achute
ĠX en
erson al
Ġun expl
Ġacid ic
ĠAlban ians
Ġsecre cy
ĠW M
Ġem ails
ĠAcadÃ©m ie
ent ered
let ons
ĠFr inge
Ġassess ing
Ġcher ry
ous ed
ĠFlore nt
Ġcaut ious
Ġple ading
Ã ĸ
Ġt aun
Ġdorm ant
Ġb aked
inc arn
Ġmel anch
ĠSix teen
Ðµ Ð½
rent ice
ĠCal v
ĠCar leton
m ac
Ġ iod
Ġl ump
Ġ20 5
Ġhel ium
Ġampl ifier
Ġseas ide
ĠM b
ĠD OS
Ġseism ic
ĠB Ã¶
ĠP agan
et ch
ĠB ourne
Ġbarg aining
op olis
antan amo
S erb
ĠMah mud
Ġsque eze
bud get
Ġmanager ial
ĠB omber
Ġelect s
let own
Ġrecommend s
Ġforer unner
k ir
Ġh ints
ĠCh au
ĠWall er
Ġunderstand s
Ġcalc ulating
Ġplaint iffs
r ith
ĠSh ab
Ġdisturb ances
Ġtransmit ting
Ġallev iate
Ġb iting
Ġbo iled
Ġsuper iors
ĠTer ra
Ġrisk y
iz an
per formance
azz i
s ala
ĠBe acon
ĠMechan ics
Per haps
Ġj umper
lect ive
Ġregister ing
Ġkick er
ow iec
ĠWood row
P ont
Ġaccess ibility
ĠBloom berg
ĠPar ry
ĠMahar aja
Ġc ube
oc ular
Ġen raged
Ġ16 3
ĠFre qu
AR C
l ian
ap i
Ġj ar
ĠArch deacon
ĠInc orporated
ãĢ ģ
m iddle
Ġcent rally
Ġspread s
ĠSoul s
l ocated
Ġar sen
ĠSp ir
ĠGam ma
Ġfract ured
ĠL aval
ĠL ori
ord ered
Ġ3 16
Ġ17 30
lin son
Ġquick er
ĠKar im
Ġsing led
ĠSil ent
ĠHa hn
ĠB au
Ġpress ured
Ġn g
ĠDec o
ĠMont rÃ©al
Ġsp it
Ġhoriz ontally
enc o
Ġr ue
Ġmed ial
ĠLaksh mi
Ġever green
ĠG oss
Ġmemb ranes
ĠOg den
Pro ject
ĠL ana
ĠPl um
ĠBienn ale
ĠW ir
Ġ7 37
ran i
ĠP AC
ĠIn ch
ĠEd na
Ġspot light
ĠCrit ic
U kr
Ġa ust
ĠB asket
ug al
ĠA ugsburg
ĠTe lev
ĠGh az
as us
Ġcolloqu ially
ĠA idan
hy d
ĠWe ight
ĠCouncil s
ĠUnder wood
d ollar
ish am
Ġelect or
Ġtheor ist
ĠPh on
Ġcontract ing
ĠÎ µ
T ar
Ġd ared
Ġreb elled
Ġraid ing
Ġinjust ice
ĠSentin el
ĠU T
ĠRoll ins
iaz za
ĠN ets
ĠAs hes
ĠWest wood
ĠBo z
ĠIn let
ĠRe es
Ġcolour ful
Ġrabb its
s port
Ġre ductions
ĠKore ans
Ġrevers al
f ollow
ĠR Ã¶
Ġte asing
b Ã©
ĠEric a
ĠFaul k
h ma
Ġjur ist
ĠBrent ford
Ġcatast rophic
S oc
Ġent om
18 70
Ġrend ezvous
ĠPrincip ality
Ġbar ley
Ġcontrovers ies
Ġsatisf actory
om ics
Ġhe nch
ĠAd ele
ger ies
Ġpredict able
Ġtrunc ated
Ġestr anged
ĠM im
Ġgang ster
ĠBrew er
Ġun im
un cle
ĠG L
Ġback pack
Ġliber ties
ĠCh orus
eps i
ĠPo ems
ieg el
ount ains
h ari
ion ale
Ġn av
rou se
ĠKh ark
ye h
ĠGo ethe
ĠAp oll
Ġlith ium
at is
Ġst amped
Ġpat ted
ĠVal enc
Arab ic
Ġmet a
Ġban ished
Ġep och
Ġsil hou
Ġth w
IS T
b os
k om
Ġin let
ton es
Ġhit ter
Ġbe asts
ĠWh arton
ĠOb ject
ĠPhyll is
ĠC us
Ġhour ly
oc occ
ĠGe ography
Ch urch
Ġal kal
Ġsent encing
ĠD urban
Ġprohib its
ĠHezb ollah
Ġwh arf
Ġim itation
Ġinacc urate
S her
Ġsuper ficial
Ġhope fully
Ġfabric ated
Ġheter osexual
Ġcon es
ĠK inn
ft on
Ġref it
ĠAf rika
Ġindic ative
ĠPA VN
ĠAstron omical
Ġpercept ions
ĠMesopotam ia
ĠS uc
ĠIn uit
Ġall ot
Ġdem oted
I r
ĠB out
ĠD har
Ġuns uitable
ren ces
Ġelect rification
Ġint ra
ĠK P
Ġdown fall
ugg er
co ach
r ather
ĠChic hester
Ġm u
represent ed
ĠCh aud
Ġcomm emoration
Ġind ent
Ġdispro portion
iz i
ĠY eh
ĠSe le
Pol ish
m ist
ol ute
ĠInd och
Ġhard ened
Ġfr ank
main ly
Ġtheir s
ric idae
ĠUnit arian
Al b
f unk
Ġp ads
Ġinter course
ĠN ES
ĠNept une
c en
ĠE rick
ĠU y
Ġtrain ers
on ts
Ġc av
r iver
Ġst ricken
Ġwh aling
het ically
ĠLuck now
Ġwh ipped
Ġdeliver ies
Ġruth less
as per
D VD
Ġenc ryption
read ing
H ara
ap ted
ome o
Ġ17 62
ĠOpp ortun
l iving
ĠK rem
f inder
Ġreal ities
RO M
ĠS uit
ĠH apoel
Ġsp ores
Âł 20
ester ol
f elt
Ġsuc k
Ġwait ress
im ation
Ġgood ness
ĠShel ton
Ġh are
ĠR apt
erm aid
ĠNorm ally
G erm
Ġmon otypic
Ġbo asted
ĠRad cliffe
Ġguard ians
Ġschizophren ia
Ġe agles
ĠAk h
vest on
AR D
d ress
as in
ĠA str
SA T
ĠTri umph
ĠM ina
ĠP osition
Ġostens ibly
ĠArchitect ural
st ru
Ġcont rac
Ġpamph lets
N ik
Ġb ounty
Äĥ u
i ard
j al
Ġsp raw
ĠJagu ars
Ġarrog ant
Ġv iolet
ĠSt ol
end e
opath ic
Ġtax onomy
ĠRet ail
ĠJenn a
Ġcinemat ography
p ast
ĠB urb
ĠGu antanamo
ĠEx it
Ġcred ible
Ġarbit r
Ġhy brids
ĠSab ah
ĠHarris burg
ĠMacc abi
ĠB ib
ĠDort mund
ĠY arm
augh lin
18 95
me h
ĠLon gh
ĠT rick
ĠE lev
ĠCr uc
> "
Ġdef ected
Ġembarrass ing
ĠK rug
Ġmanifest ation
ĠCit ations
o ge
ĠR ode
N ick
P ut
m is
st art
k ot
t urned
ĠSw amp
Ġrob in
Ġtur key
ou f
Ġapp les
ĠOr th
Ġstat istic
Ġresc ues
ĠAd obe
g rey
Ġmar ches
Ġs unny
ĠI CA
ĠAm or
ĠHen rik
ĠN ing
Ġad olescent
Ġhead ache
Ġfort unate
Ġtra umatic
Ġash amed
ĠCol bert
Ġext ras
os it
ĠHung arians
ab ol
ere van
Ġb ask
ĠF ever
ad ay
ĠR anges
ĠF enn
ĠY acht
ĠBern hard
AS T
Ġs oda
Ġn asty
pl ays
Ġ16 7
ar ati
z eb
ĠV ard
act ors
Ġdirect ive
Ġhes itation
D as
ĠOrd ers
it ung
ĠN al
Ġcomp uted
ĠCre ated
Ġdish on
m ills
ĠR ana
ĠLand scape
c ade
Ġ17 71
ĠFleet wood
k or
Ġc ue
Ġc aud
ig ator
Ġhand c
ĠRoman i
For bes
d ominated
ĠH oo
Ġam used
ĠMe at
Ġra ft
Ul t
Ġdissip ated
Ġatt aining
Ġtem plate
ĠRun s
Ġro oft
Ġpil asters
ĠSty les
st ates
ĠG har
Ġpl und
Ġ0 1
Ġinsert ion
é Ļ
ĠS ous
ino ff
Ġdel icious
urb ed
Ġgrey ish
Ġlib el
ĠMus k
Ġped iatric
ĠTele phone
Ġinhib itors
Ġprim aries
Ġpric ed
Ġindex ed
Ġ17 2
Ġsem antic
Charl ie
Ġob struct
bi ology
R od
Ġze al
Ġhalf back
Ġgross ing
U L
ĠK raft
ĠSch l
Ġparas ites
e ering
in ical
ĠL ai
ĠL izzie
Ġhis sed
ĠKap lan
sub marine
ĠAl ba
ĠCal houn
Ġescort ing
ĠGuadal upe
Ġclub house
Ġste alth
ĠF ill
Ġass urance
Ġmult id
Ġmar vel
n osis
Ġcard iovascular
ĠC oke
Ġfrequ ented
Ġ0 6
Ġartef acts
Ġh olog
ĠP ud
Ġst agn
ĠL Ã¶
Ġimpl ant
commun ist
Ġ16 1
d ain
ot ide
Âł g
sex ual
Ġmonarch s
Ġc rou
ĠQual ifying
Mat thew
Ġrepet ition
ĠH agen
10 8
ĠC IS
Ġus able
Ġoff enses
Ġexp ressive
ĠProv ost
ans ki
Ġmad ness
ĠC ogn
Ġinv oked
Ġlugg age
c ult
ĠG ly
ĠG arner
Ġmin iat
ĠSk ye
Ġtrust s
ĠKra i
ĠPe Ã±a
st orms
olog ue
Ġtop ological
Ġinhib it
ĠNeighbor hood
Ġunder mine
box yl
an other
Ð¸ Ñ
M erc
Ġintr insic
ĠSc ully
ĠSe vens
Ġgreen ish
Ġadherent s
Ġ um
Ġred irect
ĠSo ap
ĠH oughton
ot ine
ap ple
ak on
ĠMar low
ĠVel vet
Ġorchest rated
ar ly
per haps
ace ans
Ġimper fect
p arent
ĠL eth
R en
h ay
arl ic
Ġty res
Ġallow ance
ĠDer rick
Ġcorps es
Ġmeth ane
Ġe up
ĠV ide
Ãº l
z ia
op atra
Ġpost age
Ġg rot
ĠG ina
Ġd ucks
arrow s
ĠMarj orie
Ġsubdu ed
F al
ĠMy st
Ġdict ated
ĠD os
Ġprofess ions
ĠSad ler
K Ã¶
Ġnot icing
ĠCher yl
ra ising
Ġappl iances
Ġmouth s
girl s
le wood
ĠF IS
ĠMan ly
Ste ve
Bat man
tting en
Ġno ir
ells chaft
ĠSur geons
Ġintersp ers
Ġapplic ant
educ ated
Ġsynthes izer
Ġcar avan
Christ mas
ĠMcD onnell
P y
W atch
Ġhe pat
ĠSer ra
ipp o
isl aus
Ġimplement ations
Ġaccol ades
Ġdev iation
Ġadap ting
our a
Ġvent ured
Ġtor so
x ia
Ġ0 5
ĠGu o
ĠMo ose
ĠBern ardo
ĠP ard
Ġprohib iting
fle et
ĠJohn stone
ĠRo ach
Ġtelenov ela
Ġg ir
ĠCh oi
ĠTh inking
Ġsw ollen
Dam n
Ġbests eller
ĠA head
Ġgl orious
ĠH ilda
Ġg othic
ĠP ose
ĠHar b
Ġaccount ability
ĠTro ops
ad ata
Ġpier ced
ĠPh araoh
Ġstand alone
Ġhon esty
Ġinflamm atory
ĠS Ã¸
ĠL O
ĠMu eller
ĠDoctor ate
Ġpreced ence
D omin
Ġsuit es
ĠWa ik
ĠKÃ¶ ppen
N ME
z ar
im ps
ĠN umbers
ĠQu an
Ġsn orted
ograph ics
ĠHiros hima
Ġd op
ĠD ever
ĠMust ang
Ġsurpass ing
ir am
Ġsequ encing
zz i
ĠSaf e
D ick
Ġh inted
ĠV T
br ush
irection al
nes ium
idal go
lide an
æĿ ĳ
ĠK ik
Ġproced ural
i ates
pr ivate
à ·
ĠMe asure
she ll
Ġflash back
ĠS onia
Ġwhis key
ĠLac rosse
Ġnov ella
st ellar
ot eric
Ġcut ter
ĠWhite head
ge an
Ġengr aving
ĠKauf man
> '
ath s
Ġpri ory
ĠEm ilia
Ġcalm ly
Ġf erv
ur am
Ġres il
ĠPl ants
ĠGl ob
Ġor naments
ank o
ism a
Ġrout ines
Ġstim ulated
c ondition
i ade
ĠS ver
Ġre ed
Ġdescript ive
Ġintermitt ent
ed es
ĠW Ã¼rttemberg
ĠO BE
18 99
gr id
Ġp he
ĠB ux
Ġsuperv ising
ĠS AC
ill ation
ĠCh is
Ġpre ach
Ġ0 7
Ġste er
Ġfavor ites
Ġdeterior ation
ĠBeau fort
. </
ĠCh icken
Ġblank ets
N ord
Ġover shadow
Ġgest ured
Ġpres chool
ĠM uth
az ers
reg ion
Ġk e
Ġbot any
ĠHell enic
Ty pe
Ġign ition
Jac ques
ĠNeum ann
Ġexp ands
ĠCar ver
Ġcarbon ate
Ġcounsel or
common ly
b read
ĠD olly
op he
ĠAr und
Ġcor rug
Ġgo ose
eg a
A ri
æ ĸ
Ġpe ac
D OS
Ġe ukary
ĠY en
ĠOr n
ĠOr ph
Ġfacilit ating
ĠEdu ard
Ġscout ing
ĠBolshev ik
Ġnoct urnal
D est
ĠB I
ĠB ail
Ġdistinct ions
ĠSher lock
Ġst ove
Ġde graded
Ġ17 61
con taining
ĠWall is
ĠP addy
od ar
ys z
ĠCaucas ian
ĠI ra
ĠG he
Ġhom ogeneous
n ever
ad t
R iver
Ġr ite
ĠTro tsky
ĠRI AA
J oh
Ġn ig
Ġimm ort
Ġ uter
ĠFl oor
ĠShep ard
G ab
ĠH ock
ĠH abit
ĠMusic ians
ĠMun ro
ĠR andom
ĠW ren
ĠN ess
der ived
Ġcoinc idence
ĠH anoi
ov y
Ġcas ually
r Ã¶
Ġc avern
ĠMar iana
Ġg mina
Ġ20 22
ĠJ ut
is ations
Ġclass ifications
Ġhy giene
Ġadjust ments
ĠN air
ĠEl mer
ĠChrist y
ray ed
apt ic
Ġfer ries
ĠSiber ian
ul ae
Ġdioces es
ĠM ens
Ġ16 9
Ġdesign ate
ĠMus a
ĠAm az
ĠRid ley
Ġstrateg ically
ĠShand ong
Ġa iding
Ġ( Â
ĠF erm
bus iness
Ġinflu encing
ĠSovere ign
Ġship building
Ġkilomet er
Ġl ush
Ġdisc rep
ĠR ays
á ¼
ĠD rey
ĠGe o
ĠCal c
Mad ison
ĠRoman o
Ġcal ibr
he ts
Ġdyn asties
6 50
ĠW ass
ĠJo aquin
ĠBl anco
g ot
Ġty ph
Ġhard est
ir ting
Ġstar vation
ĠB ree
Ġ17 55
Ġ à®
ĠS ear
ĠRoch dale
Ġt ugged
ĠW ear
ĠX ML
Ġrede veloped
Ġmaxim ize
Ġshort stop
Ġrever ed
end s
ood le
ĠIs id
itor ious
ĠQual ification
am ara
ĠD H
ĠW HO
ĠG ators
ant ics
ĠChap lin
T ony
ov il
Ġpe an
Ġ16 6
Ġgl or
Ġbat ter
ĠLa unch
ĠHur st
Ġan omal
Ġsong writers
ling en
ĠWall s
c alf
ĠG ideon
Ġcons cript
uk es
Ġbar itone
Ġtax onomic
Ġf ren
ĠB oc
Ġex iting
ik on
ĠEstabl ishment
Ġpro state
are k
hol es
gu ided
áº £
ĠNik ola
sc enes
ĠSom me
Ġrehears als
l aus
v ist
Ġcond ominium
Ġrepuls ed
Ġd ich
A FL
p osed
El iz
es ville
Ġtr an
ĠF ishing
per ing
Ġrevol ver
ĠD oo
Ġacknowled ging
f inger
ĠL over
uz zy
Ġeval uating
Ġelectro ly
ĠRank ings
ĠSub urban
im age
ĠFrances ca
Ġf illy
ad ri
ĠGr id
Ġparent heses
J ud
ou che
ĠB ismarck
Ġopt ics
ĠFe atures
ĠJ el
ind ra
Ġhope ful
Pr incess
Ġacc ustomed
Ġ16 4
ĠReg ions
Ġvirt u
ĠHawth orn
im os
ĠDe V
Ġconv icts
Ġcycl ones
Ġmay ors
Be at
H and
Ġsk irts
t arian
Ġtherap ist
á» ħ
ĠP rit
Ġsub continent
ĠBr ands
ĠBuff y
ĠCauc us
ing ale
ĠFi ore
ach ts
ĠCarol yn
ic os
ĠM abel
Ġcomm uted
Ġfier y
Ġphilanthrop ic
ĠCod ex
Ġte aser
Ġman power
Ġkn elt
Ġthink ers
ĠPret oria
Ġcycl ic
Ġin gen
Ġg ard
ch anges
Al ice
inder ella
ĠEff ect
ĠKimber ly
ĠH air
Ġst oring
ill and
Sam uel
ĠLect urer
p id
Ġp oultry
iem ann
ĠBarcl ay
ĠMed ium
Ġm ausoleum
Ġit al
Ġpictures que
ĠL umber
Ġmin us
Ġhom icide
M agic
i ably
ĠR d
og rad
ĠAs pen
Ġstadium s
Ġgarden ing
ĠJ oc
ot ional
ĠG ull
ĠWood land
ĠHot spur
ĠMar r
Ġb art
ĠP ots
ĠN it
Ġto pping
og es
Ġj aws
Ġsurf ing
Ġsl ice
ĠPret ty
ĠBoy er
ar ial
ĠB ik
Ġbishop ric
ĠFeder ico
Ġar d
ĠDiet rich
v able
Ġbut cher
ĠY erevan
B an
S and
ĠJordan ian
Ġpist ols
aw ays
Ġint oler
hydro xy
Ġpe at
ĠMarqu ette
et ting
un ts
ĠW aver
Ġmon oc
Ġmount aine
Ġintern ship
Ġfle ets
Ġcorrespond ed
ĠDone gal
Ġtop ical
ĠMel ody
N i
c ru
Ġbr aking
uss ions
ĠTrib al
at lant
ĠIn fer
Ġdis illusion
ĠHun ters
J ane
ĠV R
Ġsyn od
ĠSc i
ari ate
at ches
12 3
ĠOper ational
Ġcomed ians
ĠLans ing
T on
elf ord
ĠClare mont
ur ous
ĠRe illy
= |
Ġr amps
ĠSal azar
ĠH iber
ĠL ond
Ġout set
Ġalcohol ism
comp uter
ĠJ A
ĠRed d
ĠF ool
Ġgun powder
ĠOl m
ĠConfeder ates
ĠMcCorm ick
Ġstr add
Sp irit
Ġtet ra
K arl
reat ment
ĠBur gh
ĠF ron
Ġfel ony
ĠP ia
Ġclass mate
ĠGo ose
Bus iness
l ius
Ġsw elling
Ġterr aces
ĠL ax
Ġsac ram
Christ opher
ing les
ĠSh ark
Ġsemin ar
) ).
if era
Ġtim ely
Ġdistingu ishes
ĠS weeney
ĠSever n
v onne
ic key
cl iff
ann is
Ġpron ouns
Ġsupple ments
Ġbeque athed
Ġrel ocating
Ġmat t
Ġambass adors
ĠInternational e
Ġdil ig
ort ing
ĠSout hend
N HL
ph in
ĠCor r
Ġthick er
ĠP O
man agement
Ġ16 30
oul a
ĠMir acle
Ġâ Ī
south west
ĠXX X
Ġhorm ones
Ġresurg ence
ĠG auss
pro ductive
ĠMald ives
ĠG hent
Ġfl ashes
Ġ17 15
Ġjew els
Ġf ences
Ġun specified
lÃ© ans
ĠKonstant in
ĠD ental
ĠG ork
ĠPrim etime
Ġnerv ously
N ob
ĠP ie
ĠG era
ĠK ib
Ġcast s
ĠW rocÅĤaw
og ist
ĠDe L
ou pe
Ġep ile
ĠSing ers
Ġmemor andum
ĠPharm acy
Ġk a
ĠInd ie
Ġins isting
ĠIslam ist
f uel
Ġ17 45
Ġno ises
Ġcoin age
Ġspear headed
Bey ond
ro vers
ĠB ie
ĠJoh or
Ġres in
Ġpublic ized
ĠCro ats
c els
Ġphil osoph
gu ards
ĠBill ie
Ġhum ili
Ġcy toplas
ĠHundred s
________ ________
ĠPro c
ĠMcG rath
Sm all
ĠSched uled
Ġlub ric
ĠP LA
Ġpol led
Ġun sc
Ġar bore
ĠMart ian
ĠBer ber
ĠCommun ion
ĠAthen a
ĠTort ricidae
Ġc ured
ĠA ly
ĠA ins
ĠK ness
Ġen umer
Ġend ings
é ĥ
ĠTel esc
f asc
ĠG ip
mas ters
ĠSlow ly
ĠHistor ians
ĠGriffith s
out i
ĠInclud ed
al ism
und e
et res
Ġeng ulf
Ġadvis ers
ĠRank ing
Ġperipher y
Ġarom atic
Ġneurolog ical
C her
ĠC umbria
ĠCarl son
Ġcurv ature
Ġ elf
Ġv es
ĠFor med
ĠD ino
Ġbur sts
ĠBen ito
W eb
ol om
ĠF ing
Ġrad ically
ĠHand book
ĠT amp
ĠT arant
Ġcr acking
ĠN ij
act ly
Ġup bringing
Ġdr aining
ĠKnow les
Ġ16 20
Ġpen is
Ġtext ual
ĠDraw ing
r pm
iz o
Ġpept ide
C old
Ġd ur
Ġfundament ally
ĠRo oney
f ed
us i
ĠFalk land
ĠMay nard
met ics
ĠPil grim
ĠL imb
ot Ã¡
ĠF av
ĠE ure
ĠHon ors
Ġmis ery
Ġregul ates
Ġoptim istic
Ġdism ay
' ;
n en
Ġv audeville
ĠTh y
Ġmyster ies
m oving
ĠLe ave
Ġathe ist
d ream
h abit
Ġh uts
ago za
bre aks
Ġsinc ere
R eb
ĠBo h
Ġthr ill
check ed
Ġout fits
ĠOl af
Ġfat ally
Ġtr ance
ĠDes k
Ġbal ancing
Ġredist ribution
ĠSigism und
Ġadj ud
ik al
Th ose
Ġappropri ately
Ġassass inate
Ġpanch ayat
Ġd ire
ĠAng le
Ġpred atory
he on
ĠV aux
Ġmakes hift
ĠMarian ne
ĠO lim
ĠK F
Ġapp la
hn a
aul d
Ġprin ters
in strument
ens ely
pan ic
Ġsand wic
Ġtransmit ters
1 16
idd y
ĠHar i
ĠPet ra
f ellow
Ġmilit ias
Wh atever
ĠIss ues
j id
ĠCl o
Ġfur the
Ġsymph onic
T itan
k har
âĢ¦ .
C BS
ĠExam ination
os se
Ã¡ t
Ġpl ight
Ġwhat soever
Ġvisual s
ĠStef ano
ĠF az
ĠF argo
ĠK arel
ex ecutive
Ġinev itably
m ins
Ġmand ates
ĠGri zz
mond s
ĠE in
ens er
Ġwhere upon
Âł 6
ĠSc ream
Ġbo ating
Ġincompat ible
ĠMon uments
ĠLuc ifer
Ġsun shine
Ġleaf lets
rex ham
Ġl izards
Ġenvironment ally
ĠMod els
Ġemb odied
l ides
ĠD Ã¡il
Ġwr ists
ĠBil bao
Ġt apest
Ġle verage
ff e
br uck
Ġbag gage
Ġrestrict ive
r arian
Ġn ad
Ġpr ag
Ġfavor ably
Ġbud gets
ĠIC T
ĠMcD owell
ĠI th
Ġ" .
Ġnorth wards
ĠMan i
ĠDmit ry
Ġdre amed
- '
ĠPal atine
ĠIsab elle
Ġdrift ing
ik ovsky
irm ary
Ġboss es
ĠAdvert ising
ĠPrak ash
ĠT ool
Ġ17 1
ĠPol ly
Ġcommun icated
ĠA iden
ĠHe x
bo a
ester ly
Pat rick
ĠM acy
Ġad jective
Ġpeer age
Ġfoot print
Ġhal ves
ĠVent ure
S H
at ism
ĠA SA
Ġmon ograph
ĠXin jiang
ĠSusque hanna
ĠMo j
Ġdu ly
Ġupgr ading
Ġcraw l
Ġsc am
ĠB ugs
ain a
Ġhelm ets
ĠP ocket
ĠSl ave
ÄŁ lu
u ven
ĠC erv
ĠSh oot
link ed
Ġtar iffs
ac ola
ill in
act ed
ĠR oe
Ġr az
ip an
v od
ag ent
Ġpromot ers
ĠFrank ish
ĠFred dy
Ġemb ell
ĠBoliv ian
ah ua
Ġkill ers
ush u
Tex as
Ġpast ures
ĠDun bar
Ġsynd ication
T erm
ung en
Ġdeal ership
dig it
Sah aran
K iss
M ond
Ġcontend ers
b n
s am
E th
L im
Ġsor cer
2 10
Ġst acked
St re
ĠG aud
ĠV ere
ĠTh i
at ured
ĠDem p
Ġindic ations
Ġleg ion
eco ach
ĠA SC
ĠT X
Ġwreck age
Ġstall ion
Ġh ail
Ġg inger
ĠEl ise
ĠBar i
udd le
Ġstep father
B ol
Ġb ipl
im ates
Ġsmall pox
ĠMuseum s
ĠCa es
G s
t ow
ĠM ata
ĠF ans
Ġsc ary
Ġh av
ĠH urd
ĠMar gar
Ġ17 64
Ġclass ed
ty pically
Ġsk ew
ĠU ri
Ġ17 66
ĠBl anch
sc ope
ĠDa up
g ly
g ado
or ro
ĠFor ge
Ġsk ipped
Ġmobil ized
Dou ble
Ġabsor bing
Ġspor adic
Y o
ĠF Ã©lix
ĠCl ause
ĠSe lected
Ġauthor itative
d z
em ing
ĠMain tenance
ĠT E
ĠD ias
ov el
ĠPais ley
Ġ17 59
ĠOpen ed
ĠSav ings
Ġori ental
Ġg ag
ĠAugust e
! '
18 96
Ġdel uxe
sh it
ag ong
Ġsh red
ĠSur face
ĠT aw
Ġhous ew
ĠMat rix
prot ected
Eliz abeth
Ġout lying
ĠBand ar
os ome
Ġ21 5
rie ved
d f
Ø ³
Ġintro ductory
sc oring
Ġcurtain s
ĠAnt rim
ĠEver est
ĠCorb ett
ig es
ch ia
Ġpre tended
Ġob esity
Ġcorner back
Ð° Ð½
Ġdiscl ose
on ado
Ġrep ository
Ġlifes pan
Ġwe ed
ĠB ower
ĠMart ial
ĠHung er
Ġber ries
ĠH urt
ĠW V
Ġcl erical
Ġtag s
ĠOr ch
ang ement
Ġout scored
Ġ16 89
Ġunc redited
pres erved
ĠAqu atics
Ġheav ens
ĠThÃ© Ã¢tre
ĠT ant
ĠÂ °
ĠDestroy er
ĠTh uring
let ic
ĠPan ic
ĠArm agh
ĠBurn ing
ĠDh arm
Ġspr ang
Ġn ectar
Ġnut rient
s ie
Ġp iles
ros y
Ch ange
ĠRoc helle
Ġhyper t
Ġcont iguous
ĠTor o
Ġfierc ely
E ss
ĠC Ã©
et hn
Ġsim ulate
Ġtheore tically
ĠBut te
ĠDem etri
ĠCam era
Ġalter ation
Ġpast e
Ġunf avor
ĠR itter
ĠF it
Ġmar ital
Nor man
ĠReg is
ĠWC W
Ġreintro duced
ĠSikh s
ĠNewsp apers
t ower
ass ing
ĠQu iet
ĠWil cox
L ev
ĠS TS
ĠE ileen
ĠIn struct
ĠPat ty
imp osed
ĠEth n
Ret urn
ĠFern andez
ĠCaval iers
B F
ĠL ies
ject ed
Ġappoin ting
Ġrot ate
ĠHT ML
Ġa we
ĠCol umn
Ġwr ath
ĠAtt empt
ĠI ke
Ġdeal ings
ĠBu y
Ġded uct
ĠLenn ox
ĠRih anna
Ġ15 9
Ġren umbered
ĠKness et
Ġs auc
ret ti
Ġorph ans
d ead
ĠN akh
per cent
ĠBut ton
ĠGrey hound
es ame
ost ers
Ġass erting
ĠBab u
F ull
Ġd iction
Ġdef enc
Ġasc ertain
Ġtabl oid
ol utely
Ġ4 80
Ġbuff alo
ch ol
ĠIn vent
ĠHorn ets
ĠK ne
Âł 15
Ġbarg ain
ĠChar tered
2 40
Ġf ec
ĠSy mp
ĠMor a
ĠHa ar
ĠMarl ins
Ġm RNA
Ġcamoufl age
al en
Ġtele cast
ĠCorrection al
ĠCas pian
Ġreluct ance
á¹ ĩ
Ġimpair ment
e ating
ĠF ries
Ġy elling
Ġjust ices
ĠInstit utions
m Ã¡n
ĠBol es
Ġocean ic
D u
l ins
ĠW iley
Ġl azy
yr inth
Ġcorn ice
Ġspac ious
ĠY ao
kh ov
M ill
Ġw ary
P it
ĠR Ã¼
Ġchromos omes
ĠGentle men
gan j
Ġs ilt
ĠG opal
Ġreg roup
ĠApost les
l ab
ĠJ udd
ĠO str
Ġback stage
ĠHa as
ĠBaron ess
ĠR ani
Ġdr astic
Israel i
ĠIn struction
Ġwalk way
esc ribed
Ġg ears
ĠF ile
ĠSt raight
ĠSk ip
ĠP ump
Ġrep ublished
ĠAb rams
Ġhyper b
ff en
oy ang
Ġlie u
ĠX P
ĠSk ills
Ġartif act
Ġmic rop
ĠFif teen
Ġrob es
ĠI ves
Ġfled gling
ĠPres ents
Ġcorner stone
ĠUpp sala
ĠP arent
esthes ia
il ah
Ġdis ks
Ġair planes
Ġh ack
ury a
ĠEs send
Ġspo of
ĠWolver ines
Ġgloss y
Ġ17 3
ĠRob son
Ġg abled
app an
ĠSah ib
ĠSit uated
ĠHellen istic
ro ot
ĠI OC
op ped
ĠCan ucks
con a
k un
ĠS eph
Ġ27 5
h og
or in
ĠH ua
ĠBos ch
on ce
Ġs aus
ĠLe isure
cess ion
ĠMo hawk
Ġacadem ies
Jos Ã©
Ġso fter
ĠJo aqu
Ġcr ises
Ġpath ology
am u
ab al
Ġro gue
Ġhand gun
Ġmultip lication
. [
ĠF ault
ĠDrac ula
ĠCom es
Ġatt ent
ĠBlack well
ĠFarm s
Ġphosph orus
Ġarous ed
end i
Âł UTC
ĠR ens
cont ract
ĠIn tr
Ġgl ancing
à¤ ¤
Ġneighbourhood s
Ġnewcom ers
bott om
Ġp itted
ith i
at ial
Ġ9 11
Ġunpredict able
! ,
ĠFl u
ĠHerr era
ĠE uch
Ġmiddle weight
Ġrhy me
á»ħ n
ĠF are
ĠF RS
ĠE val
Ġbu ys
Ġtar iff
w el
ĠY ue
Ġrelinqu ished
Âł am
Ġfre ak
up per
we hr
ĠZ ed
ĠRes erves
ĠAby ss
att ie
Ġtent atively
ĠB alf
ĠJ ug
ĠS itting
ĠN ey
ĠPr int
Ġcataly tic
Ġfurnish ings
å °
is odes
ould ers
w inner
z l
ic as
ĠI K
Ġparas itic
ĠP err
hn y
ĠRog ue
Ġpersecut ed
Ġbasil ica
ĠPadu a
Ð ·
ie ux
ap ol
ĠSch ultz
Ġastron aut
Ġpier cing
s old
ĠD aughters
ang or
Ġskysc raper
Ġrepl acements
ĠMon sters
ĠBarn et
à §
ĠK M
Ġrelax ation
ĠD yer
ĠAny thing
ekw ondo
ĠAs iatic
Ġpresent ers
ĠB Ã¡
ĠP are
ĠHe ine
ĠMer idian
Ġun bel
Ġvast ly
ĠResp onse
ar ov
sh irts
ĠF ortunately
Ġsecond ly
Ġg ru
ĠW rexham
Ġch oke
ech tenstein
ĠPey ton
et an
ri ke
Ġpat rolling
Ġabst raction
ĠUg andan
Ġinterspers ed
Ġwork ings
ucalypt us
. (
Ġb un
Ġp erv
Ġam azed
John ny
ĠS le
Ġbad ges
ĠGÃ¶ ttingen
Ġscram bled
Ġdis used
ĠYam aha
Ġstew ards
ĠBe it
Ġannounc ements
ers ch
Ġ16 90
Ġrest ricting
ĠVal er
Ġmo ons
ĠAqu ino
Ġalder man
st arter
Ġher ds
Ġ18 2
Ġweld ing
ĠR age
ĠE wing
ĠSamp son
Ġ17 7
Ġeast bound
ĠSub division
Ġgrass lands
P ur
hydro gen
ĠSe asons
ĠNue vo
Ġb ites
et ia
Ġbe ak
ĠW L
Ġen riched
Ġreal ms
ĠLit t
ele ments
Ġbrut ality
Ġd raught
ĠK itt
ĠGer hard
Ġa il
ig uity
leg al
Ġune asy
Ġco res
inn amon
Ġstr ay
z illa
Ġout dated
ĠSw ing
ios is
Ġborrow ing
Ġv ested
Ġsp illed
Ġpra ises
b ike
ĠE V
ĠCr ash
Ġfor aging
sk o
acc i
Ġrestr aint
ĠK hat
Ġd as
Ġtr aw
ĠT atar
ĠP epsi
ĠAr che
18 85
Ġunderw ear
ĠBert rand
ĠGest apo
B BC
P ot
ĠFair banks
Ġcorros ion
Ġd urable
ĠRe uben
Ġver ification
ĠEmer ald
ate au
ĠY on
ĠSh al
Ġsk ins
Ch ronic
Ġhill side
Ġastron auts
Ġacet yl
D ancing
ĠN EC
str uments
Ġrevolution aries
T el
Ġsp ikes
Ġrem ade
Ġastron omers
ĠDirect ory
Ġservic emen
Ġgu er
Ġaltern ately
ÅĤ a
ple t
ĠGu il
Ġantib iotics
ĠT NT
ĠZhe jiang
Ġd ement
Ġ17 67
ĠSch n
ĠPatri otic
Ġsh akes
Ġwest bound
ĠAssoci ations
Ġre worked
ĠR ik
ij e
Ġlik ened
ĠAdvent ist
P rem
ĠCol er
s pl
ick ers
Ġfl ushed
ĠVick y
ĠW isdom
art hed
ĠCon quest
Ġshowc ases
ĠRosem ary
H ans
or ative
Ġdet ainees
Ġtax on
Ġclean er
Ġaggress ively
ĠC ube
par a
amm ers
ĠDonald son
Ġpix el
ĠT akes
ĠDyn amics
av u
Ġalter ing
b und
Ġun res
Ġrec onn
Ġdis repair
Ġspec ulative
ĠConn acht
Ġec oreg
wr ights
com plete
Ġcourt room
ĠRo h
ĠMain land
Ġentertain er
TI ON
ost an
ĠTw ilight
Ġcalc ulus
ĠMar iano
ĠBog otÃ¡
% ;
t ur
Å Ī
ĠH Ã¼
Ġthr ive
ĠEp stein
Ġt rough
Ġcre pt
ĠIT F
I ng
ĠAlb ans
fam ous
Â ´
nd ale
Ġ icy
ep e
Ġev iction
fil ter
Ġcorrug ated
j ad
Ġ16 48
ĠÐ ¿
Child ren
ĠS BS
Ġpass word
ĠRad ar
' -
ĠL E
Ġpain ts
ĠDan es
D ear
Ġmy c
uv ial
Ġhandic ap
ay i
ĠW add
Ġcul inary
ĠLomb ardy
ĠAst or
Ġch ast
ĠLe ather
emb led
Ġtrans cribed
18 89
ĠTherap y
cap tain
ĠRe za
Ġ21 2
el ier
ĠMahar aj
l age
ĠF ok
Ġal erted
omed ay
Ġs izable
Ġpenet rated
ĠCollier y
ĠPont iac
imet res
Ġform ulas
ĠWall ach
C BN
Ġc ans
ĠBre ck
ĠGreg orian
" ")
ĠC MLL
Ġiron ic
ĠAlv arez
ru le
MA X
ĠHo oper
ĠAst ur
ĠTy rol
Ġon stage
ĠU mar
Ġcru ising
B and
Ġc is
ĠAs her
ĠCar a
ĠLad en
on ential
ĠF irth
uc he
op las
Ġvend or
ĠCoordin ator
b ones
lem agne
p ain
ĠW ai
Ġdisp atch
ĠG age
Ġte h
ĠAust rians
ĠSy nt
aver se
H ay
ĠK ira
ĠGu ernsey
ĠA ren
ĠAr bit
asc a
L as
Ġeduc ating
ĠR ok
ĠStock port
ĠT rey
Ġcomm encing
Ġsib ling
ĠMar ius
ĠGu ido
ĠÂ ±
G ar
l oc
ac us
ĠWilliams burg
ĠBrad shaw
arm ament
ĠCan aan
Ġin mate
ĠR ast
Ġv agu
ĠMag d
Ġrat ification
ĠClaud ius
Ġarter ial
/ >
ĠG rou
Ġbl oom
omb at
ĠKe ating
Ġanch ors
Ġe aves
Ġup hold
Ġyouth ful
ĠArg yle
habilit ation
ĠCollect ions
ĠT M
arn ing
ĠBab e
Ġfasc ination
Ġb or
ĠBeth any
Ġharass ed
Ġseiz ures
c ould
an os
ĠMor row
ĠRaj put
ĠPro ducers
inter est
Ġstro de
Ġsep als
Ġ è
ĠW ink
Ġtr illion
Ġrep ent
ask an
ĠTw ain
establ ish
he el
Ġcrafts men
ĠC ree
Ġj erk
Er n
U nt
Ġguerr illas
Ġchol era
Ġfranc s
Ġhe ret
Ġsc ars
augh ty
ĠAnn apolis
Ġcraw led
ar ism
us ky
Ġ20 6
com mission
Ġrot ary
ĠButter fly
ĠC AF
Ġund e
Ġinflu enza
ĠS oto
Ġsh ine
ĠG res
ĠY oshi
ĠPro hibition
Ġtw isting
ĠEast wood
eterm ined
v id
ro de
Ġprivate er
Ġcabin ets
ĠKild are
Ġe ats
ach an
ĠCab r
Ġincons ist
ĠBre thren
IC E
Ġnons ense
Ġen vis
ph il
com mand
Mic hel
Ġwors ened
ĠW arden
Ġavo ids
Bet ter
ĠB ets
Ġent ropy
ĠCamp o
atlant ic
ĠBut cher
We ek
ĠPen insular
Ġcod ex
Ġdess ert
Ġcruc ifix
ĠIng ram
à µ
Ġ17 6
Ġhost el
ĠBrew ster
ĠKeep er
d uty
Ġmanif ested
ĠPad ma
ĠNAA CP
Ġve il
ĠJar rett
ĠBrom wich
ĠUn ions
ĠY MCA
ĠMot o
ĠGalile o
ĠT ata
ĠN urse
Âł 9
ac id
ĠTob ias
Ġadjust ing
Ġredisc overed
Ġs ash
ow ska
Ġtechn o
chair man
g ne
ch arged
un ivers
are v
ĠSuburb s
B illy
Ġo usted
Sh ort
ĠZ al
Ġmed iated
ĠShow time
Ġwing ed
ĠSurin ame
Ġas cribed
ĠSe ed
ĠConf lict
ĠLo ire
ĠZar agoza
he mer
Ġ16 80
ĠMcL aughlin
Ġqu ery
Ġhol otype
au a
ĠLib by
ag iri
S ham
Ġs und
Ġdown s
ĠHel d
orph ism
Ġpac if
ĠMaure en
c rest
st ract
Ġdepend ency
Ġinters ect
Ġaggreg ation
ĠEmer y
ĠK ung
Ġbox ers
bo hydr
ĠBad minton
ĠProsecut or
frequ ency
b is
j ung
Ġiniti ating
ĠMan fred
ĠSl o
ĠFul bright
Af rica
ĠPom pe
re ira
Ġc alf
ĠM ove
ire ann
Ġsy rup
led ged
ĠMus eo
Ġmut iny
Ġp and
Ġfurlong s
x ton
th ink
Ġhistor i
ĠTam ar
Ġcom et
Ġreflect ions
ĠBreak fast
Ġl ooted
Ġr ation
ĠRem ix
Cla ude
ĠP isa
ĠK lan
Ġchampion ed
ĠGuill ermo
p aid
ag r
ĠAr te
och rom
Ġmicro b
Ġaven ge
ĠA it
ch uk
ĠW izards
ĠK ott
18 97
key e
Ġcop ying
ĠHun an
Ġa le
Ġso aked
Ġlit urgy
Ġmar que
ĠDis aster
ĠÎ ³
Ġforb ade
ĠInv itational
List en
ĠW E
Ġclass ify
ĠStat ute
ĠEsc ape
ĠClaud io
B D
ug en
person al
W oman
Âł century
ĠWald en
c oon
ĠCharl ott
ĠEmploy ees
ab har
Ġtr acing
ox in
S leep
ro ts
ĠGr ants
hest an
ĠMc Bride
Ġuns afe
ĠImm aculate
End ers
am eric
res istant
Ġplay ful
Ġ3 80
Beaut iful
ĠS ae
ĠPat ron
Ġauth orship
Ġmammal ian
ĠEssend on
h aving
ĠD and
C arm
K ill
sh aring
ML B
ĠClap ton
z io
Ġmir acles
ĠDig est
Ġpig ment
Ġd olphins
ap el
Ġradical s
ĠSt acy
sh in
ĠTr ondheim
ĠHokk aid
F ant
Ġpul ses
ĠAlf a
D or
uck les
Ġdream ing
Ġnet ting
associ ated
ĠS ense
Ġthird s
ĠSup plement
Ġleuk emia
k it
Ġaccompl ishment
Ġinterven ing
Ġiter ation
ĠMcInt yre
ĠAuth ors
h ope
ĠIn land
with standing
Anth ony
Ġetym ology
ĠM oul
ĠD ual
Ġhypot hetical
Ġenh ancement
Ġrec ited
ĠTurkmen istan
ĠL ech
Ġpar ades
Ġbond ed
Ġremod eled
ic er
leb one
Ġdissatisf ied
C L
ĠM ott
ay ton
Ġcap e
Ġresc uing
Ġinsurg ency
j ury
Ġv itro
ĠSh are
B und
u let
ac ters
ĠN antes
ang al
Âł 13
Ġsus pense
ĠVol ga
ĠS hips
ĠCave ndish
ĠShepp ard
f ighter
ĠZ ee
ĠHen an
Ġprior it
Ġaccum ulate
ĠTraff ord
Ġc edar
ĠH orm
Ġsk aters
ĠJos ie
ĠGal veston
accalaure ate
ĠPer l
Ġ36 5
ropod s
E ver
Ġob edience
ĠWest chester
Ġop ium
ĠLot tery
Ġbureaucr acy
gev ity
K ee
Ġr appers
Ġvul gar
F uck
R N
Ġ4 40
ĠMom ent
oc on
Ġvocal ists
ĠCou pe
Ġdi aries
Ġtim ed
sing le
ĠE L
uc ent
Ġfacilit ates
ĠPrincip les
Ġrevel ations
C ats
ĠP ek
va al
Ġsoci ologist
W inter
ther s
Ġpost master
it aries
ĠTer ri
ap ura
ĠK ylie
put ed
Ġdomest ically
ill ings
camp us
A dd
Ġvel vet
ĠGuild ford
Ġun armed
Ġill icit
ĠRy u
ĠGround s
c ou
ex cluding
f actory
ĠB akh
ĠMus ik
Ġel ves
ĠJ ail
Ġjud gments
ĠPers ians
âĢ ³
Ġtr anse
Ġg ob
ĠN ug
ĠPre fect
Ġkn ocks
ĠWW II
Ġdownload able
Ġf ission
Ġstro ked
es k
ĠM ays
Ġpartn ering
Ġgovern orship
ĠFor ster
W Ã¼rttemberg
ĠB JP
ud der
Ġsp ruce
Ġweak ly
or able
ĠF itch
ĠNo ise
Ġbreak away
ĠThe me
Ġintens ely
ĠSoci Ã©tÃ©
ew all
Ġinf requ
Ġmodern ized
ĠAnt illes
ĠTown sville
ere g
Ġslow ing
ĠProm oted
ĠExper iment
Ġbrut ally
ĠG H
Ġwater falls
Ġball oons
D ame
aim an
ĠHun s
ĠLect ure
ĠK arp
Ġduplic ate
ĠAls ace
ĠMathew s
ist as
Ġear l
ĠBurn ham
lass es
el j
Ġl act
Âł feet
Ġshut out
Ġfear ful
Ġd ipped
ga on
EA N
n ah
Ġd ice
Ġag ony
ĠInc ident
Ġre former
ĠÐ ¾
Ġfab rics
ĠUnd ert
ĠRox y
or as
ment al
ĠCal endar
Ġperpetr ators
municip ality
ĠW ur
av ille
ach arya
Ġbl adder
Ġperpet ual
Ġadministr atively
ĠRos al
ĠTalk ing
Ġfootball ers
à¤ ¨
Ġinters ections
ĠKell ogg
C ong
is ory
Ġfor ge
ber gh
ĠMi ocene
Ġfav ors
Ġtro ll
Ġdraw er
Ġsn ack
bl ad
ĠGib bons
Ġanten nas
ĠSpec ific
rad io
Ġcondem nation
ig ers
CA C
ĠDirect ive
ĠRam Ã³n
Ġspect roscopy
G ot
Ġembank ment
Ġ18 1
ĠEr as
Ġfraud ulent
ĠK GB
ade h
Ġev apor
cent ric
17 0
ĠJavan ese
ors ky
Ġshowc asing
ĠMar ley
Ġcoll ateral
ĠPsych ological
ĠO D
Ġun manned
ĠUnder standing
ĠLuc ien
Ġarche ological
oph agus
Ġexempl ified
Âł 16
ĠCap itals
Ġwitch craft
Ġpenn ant
M agn
y dd
ĠD han
ĠW ays
Ġchild less
ĠNass er
Ġcov enant
Ġp eng
ab olic
cept or
Ġhydro ly
T own
ĠT ren
Ġc row
ĠW BC
ind o
ĠAm bul
Ġinters ecting
K ey
N on
end a
Ġsuper family
rac ial
Ġanaly tic
Ġtor ment
ĠErit rea
L ieutenant
r anging
ĠB ars
Ġbe acon
ain en
f rid
ĠCom o
ĠProv ence
Ġm alls
ĠH ines
reg or
ĠVal ue
w ala
ĠP arents
ĠGuj arati
ĠIn to
Ġoper ative
18 94
Ġstick y
ĠBrah man
an er
Ġd iph
ĠD ab
ĠAm man
Ġcasual ty
ĠKimber ley
ĠR V
Ġsal ute
Ġcod en
in ine
t ze
Ġnum er
ĠBur roughs
' ".
ĠJ eep
ĠO P
ĠUn less
Ġfound ry
Ġimp etus
Ġsulf ate
h undred
ient ific
ĠTri este
ĠElect ro
Ġpear l
Ġin herently
Ġpl agi
ĠAb sol
Ġpsych ologists
Ġm aze
ĠFord ham
Ġinstruction al
ĠWond erland
Ġnoteb ook
ĠB ish
m uch
ĠShe tland
Ġpre late
sk in
For ce
aked own
Ġgall ons
Ġbear er
Ġvig orously
Ġchick ens
ĠL G
ĠG um
ĠCh ico
ched uled
ĠSime on
Ġfisher y
H MS
Ġt apping
och ial
Ġconvers ions
Ð ¿
ĠZ ub
ĠBolshev iks
w ent
Ġb rom
our ke
ĠHodg son
Ġp acing
ĠReg istry
ĠGust af
Ġimprov isation
Ġflaw ed
t les
ĠH aut
Ġsk ies
Ġmult icultural
Ġcounter attack
chel les
t ok
Ġshed s
V e
Ġqu arries
Ġam put
Ġthought ful
Al an
Ġsidel ined
Ġback lash
ac ie
Ġst igma
ĠR iot
Ġart isans
Ġaqu educt
Ġassim ilation
ĠRe lease
ĠPl ot
Ġdisappro val
Ġp igeon
ĠDr ury
ĠBa ud
ĠCÃ´ te
h asa
ĠSim a
Al fred
ĠMaz da
Ġunauthor ized
ph on
ĠMc A
Ġsnow fall
ĠArgy ll
Ġd imensional
Ġdisadvant aged
Ġpoor er
ĠAthen ian
ĠS olic
ĠM aul
ĠEar le
Ġadopt ive
st arring
ĠI RS
ĠMcK enna
Ġinterfer ing
Ġh ates
Ġj oked
Ġmag nesium
Ġmot el
ĠTro jans
ĠHors es
indust rial
ĠT KO
Ġant igen
ĠEarn ed
Ġcrem ated
Ġsew ing
ind en
ro th
ĠC AR
Ġr uf
ke nd
urb ation
ĠPlay ed
ĠHorn e
ĠHem ing
etr ack
); "
Ġtermin ates
ĠYe oman
Ġon t
P res
la very
ĠSil v
ĠRach ael
Ġse aling
Ġunc ondition
Ġsuperst ructure
Ġcland estine
r n
ad ze
Ġlong ing
Ġar chery
ib el
ĠMu Ã±
Ġgigg led
Ġlinem an
d eb
j ev
ÈĽ a
Ġestim ation
Ġid ols
ĠSU V
ĠAe gean
K o
Ġh oc
and ing
ĠâĢ ł
ale h
18 88
ĠFred rik
Ġmort ally
Ġg hetto
ĠP unch
Ġsl it
ĠArg on
Ġcit rus
ĠII HF
Ġtail ored
Ġd oping
ur ion
ĠLu h
Ġacknowled ges
Ġflank ing
Ġirre levant
Ġbe an
ist ine
ĠOr r
ĠPal ais
Ġpaper work
Ġb aking
Ġn omenclature
ĠL ung
ĠMo e
ĠR idd
Ġ17 10
ĠMah al
r ide
H eb
R ef
vel d
Ġsub missions
ĠCor rect
ĠKhy ber
Ġmerc enary
ĠSer pent
Ġmus ically
ĠKath ryn
ĠB hatt
ĠMary lebone
ĠÃ ľ
Ġ Ïĥ
17 5
ĠRother ham
Ġm uddy
t ag
re ceived
Ġspec ifies
uck et
Ġwa ivers
P ubl
ĠF idel
mand u
3 75
T een
ru he
Ġacc uses
Ġdon key
ĠH idalgo
iss y
Ġl amin
Ġcon dom
Ġalphabet ical
ĠS iam
ĠD P
ab ies
ĠK ont
Ġchar ismatic
18 92
lo at
ĠAust en
ĠGu illaume
ĠP RC
ĠAccount ing
Ġbub bles
iz ia
iy ar
ĠProgram ming
O rd
f at
odd y
Ġsmart phone
Franc is
ĠTr im
ĠEconom ist
Ġcomm its
Ġle apt
18 78
echan ical
Ġteam ing
ĠNew bury
ĠGra eme
Ġb ows
ĠI SA
Ġret ic
ĠClub e
ĠMel vin
Ġillustr ating
ĠDmit ri
ĠIndoch ina
V is
ĠD ra
ty n
Ġsust aining
ĠPens acola
ĠT W
ig al
ĠArr iving
terror ism
ept ive
Ġ17 56
ĠKy iv
ĠBloom field
ĠPiet er
omb s
Ġbear ings
ĠG j
Ġgig antic
Ġh awk
ĠD enton
ĠTe ut
c um
le k
ĠG inger
Ġi Pad
Ġbread th
d as
n ominated
18 60
Ð¾ ÑĢ
ĠTak ah
Ġpolym ers
P ap
ĠB urs
ĠK ling
rup ts
ĠCont ent
ĠHil ary
Ġhar ps
ĠFreder ik
R ah
ĠG ed
Âł people
y et
und ai
Ġignor ant
Ġhierarch ical
fashion ed
M orning
N azi
ul ose
ĠHe idi
ĠMonter rey
ĠGilm ore
Ġag round
rif ice
Ġfil tering
Ġdispers al
is ively
ch ak
ĠL ounge
Ġmod ulation
Ġnatural ized
Ġdirection al
Just ice
in idae
Ġesc orts
se ater
ĠHimal ayas
Ġoch reous
Ġ ure
ty pes
ĠJon ah
Ġsl ips
Ġprotect ions
Ġindef inite
Ġcons cription
ĠTrib es
Ġdesper ation
ĠMey rick
ĠK Ã¼
Ġstri ped
Ġhe ath
ip line
ĠSt or
Ġ4 20
Ġclar ify
Ġporn ographic
/ -
Ġunder est
Ġones elf
ĠCre ole
v d
ĠVinc i
ĠNav arro
Part y
Ġcan v
aj u
omew here
ĠPe acock
Ġdub ious
F est
Ġnecess itated
Ġprophe ts
ĠT res
ac ic
ĠP ou
let ta
Ġag rarian
." )
ĠEll ington
Ġconsult ancy
ĠToul on
Ġf les
ab u
ĠEx hib
ĠMotors port
Ġfragment ed
Ġab original
ĠDel aney
ĠSpart ak
Ġprofic ient
ĠF ender
ĠZ hen
com pl
Ġfact ual
K on
lect ing
Ġheav iest
Ġsh aken
ĠMat ters
ĠSingapore an
Ġpar ch
ĠDan zig
ĠU ran
18 93
she et
ĠU lysses
du ke
ĠNov ak
ĠWrestle Mania
P ret
it os
Ã« r
Ġstew ard
m aid
Ġj elly
j ournal
ĠL yle
oy ne
ĠLibr aries
Ġsim ulations
Ġcolor ation
Ġalt arp
ial e
ĠEr win
Ġsquir rel
ĠPots dam
1 19
ĠPl att
ĠSaskat oon
Ġc ite
Ġ30 1
ĠSpecial ist
n ative
ĠB aut
ĠV aj
c f
Ġlife boat
Ġpost doctoral
abil ia
rav ings
ĠPere ira
ĠVaugh n
ĠDe g
Ġwealth iest
ĠVik ram
Ġundergo es
ĠManch u
ĠNaw ab
ĠP oss
ĠComp osition
lic ensed
phthal m
Ġob struction
ĠKu y
Ġtr unks
ous s
ĠHigh landers
Ġchol esterol
Ġerupt ions
ĠRoan oke
na ire
ĠMon etary
ĠS ava
ĠL ime
Ġhas h
ped o
Ġbi ased
Ġmon opol
cut ting
ĠPod l
ĠFrem ont
ĠWelles ley
I E
Ġch al
Ã© on
ĠDi ary
ĠLem on
ĠChrist oph
Ä« r
Ġwound ing
Ġblend ing
Ġh uh
Ġtub ular
Ġcollaps es
of ield
f un
Ġmic rom
st ow
Ġ17 57
Ġcard board
ĠExpl oration
ĠDy ke
Le gend
Ġprox y
se ed
Ġaster oids
Ġannoy ing
ĠPend leton
Ġenforc ing
O m
Ġsl oping
iment ary
Ġill umination
ĠGood s
Ġreconc iled
Ġpiss ed
ĠP G
ĠHoff mann
ĠD irk
ĠD raper
Ġsal ad
ĠC BE
ĠTh ak
ĠCar b
Ġer as
ĠGoth am
ĠSarat oga
r ash
A bs
s low
Ġcab aret
Ġaccord ion
Ġescal ated
en ity
ĠR umble
Ġling ering
il ess
Ġsh am
ĠChrist ensen
ĠEle ments
ĠF lex
ĠHis p
ĠGreen berg
Ġdeterior ating
ĠMait land
N eal
g all
og on
Ġfisher man
Sy dney
Ġrecapt ure
Ġjun ctions
) '
ar ic
ĠTr unk
Ġped iment
u ously
ĠT enth
ill ard
ĠLo ft
Ġdissatisf action
ep r
Met al
ĠPurch ase
ĠE man
ĠQu arry
ĠMcG regor
T ok
Ġport ed
Ġsat urated
Ġmo aned
Ġbe ers
ĠAl var
Ġoriginal s
ĠExp ression
W P
Ġb ait
ir y
Ġgre ed
Ġsh outs
Ġfree ing
ur ist
ĠSud bury
ĠP ash
ens ky
tle t
C ham
S ounds
ĠApost le
Ġpack ets
Ġcit adel
signup Form
G un
ĠB rou
Ġ' ,
ĠApp lication
Ġdemonstr ators
ĠTian jin
P rog
Ġb anners
ĠF ourier
ĠN arc
ĠÅļ w
on et
ek ers
ĠIs f
Ġdisp os
Ġow es
Ġc ess
ĠH ov
ĠShe a
Ġtail or
0 39
ĠG ild
Ġshut down
Ġwhis pers
ry an
ĠCr ab
ĠSax e
Ġchron ology
ĠL oz
ĠHarv est
ĠM Ã©t
ĠV l
Ġper ch
ĠGener als
f ron
Ġ20 8
um o
ver a
Ġadolesc ents
ĠDo ha
ĠRev olt
ĠTro jan
Ġtal uk
ĠCaled onian
ĠIn struments
ĠPal o
ĠGymn astics
Ġparan ormal
Ġ Ñ
Ġt ilt
ĠS aff
ĠF ond
Ġhead lining
Ġf itt
Ġcl ap
Ġ17 54
ĠBre uning
ĠW D
Ġchem otherapy
Ġvine yard
ĠReg ents
Ġbar bar
Ġdom es
Ġun real
ĠM FA
cent ered
ĠIsrael is
ĠAdv oc
J R
m ake
Ġis o
rit er
Ġ25 00
ĠX M
Ġid le
ĠShap iro
ĠK uch
ĠA Z
ĠE us
ĠTan aka
Ġev ade
ĠArt uro
Ġder el
ä ¹
Ġsl oop
Ġconn ot
ĠHarl an
iv el
ĠJ ans
est hetic
18 91
Ġemp owered
ĠRol ler
ĠDat abase
ĠKh uz
ĠCraw ley
ä¸ Ń
ĠK ie
Ġrec alling
ĠHaw ker
Ġinhab its
ĠÎº Î±
o ia
Ġam nesty
ĠSup erm
Ġenc odes
Ce lebr
ĠS vet
ĠDes cribed
pop ulation
as ping
ĠC ure
ĠDec ca
Ġarrang es
ĠDomin ique
a ust
Ġag itation
ĠH eck
Ġtr apping
Ġturb och
Ġsad ly
ĠM ather
ĠJiang su
J ay
ĠB ones
ĠMus h
ĠBill ings
5 50
b ent
we ig
ĠSk ull
Ġsubstant ive
Ġbreast stroke
und ra
Ġ3 70
ĠJul ien
ĠE B
Ġiss u
ĠAg atha
ÃŃ rez
Ġdetect ors
ĠTelesc ope
ĠB oon
ĠAm it
Ġtheor ists
Ġon click
Ġst if
Ġaccommod ated
ĠDeleg ates
ĠContr ary
Ġf ountains
uge ot
ĠFre estyle
ĠReal izing
Ġinfl orescence
g overn
ĠH E
Ġdetect ing
ĠCelebr ation
view s
Ġrevol ving
Ġ22 2
ĠCer ro
Ġpedest al
Ġdign itaries
Ġpromulg ated
ĠMar ble
ĠMe ath
Ġuns atisf
ĠMull er
; ">
b j
Ġrepl icate
ĠSpring steen
Ġcomp rehend
key es
ĠEuc lidean
l le
ĠS ett
xt ap
Ġident ifiable
ĠMo ors
ĠHel icop
wing ed
ĠConsid ered
ĠShe ep
ĠC uth
ag as
Ġlearn ers
ĠVed ic
ink y
ĠW ab
ap u
at iv
ĠField ing
Ä± k
ĠH ate
Ġcol oring
az ir
hu ang
Ġgall antry
l ive
Ġoccur rences
ĠClass es
Ġmagn ate
Ġnavig able
Ger ald
ĠBound ary
ass ie
Ġappet ite
G y
ĠP ace
ĠD arm
ĠMax imum
ĠEls ewhere
Ġst out
ĠG ym
Ġcro re
ot to
ĠSt amped
ĠAutom obile
ĠO N
Ġsubs istence
ĠLÃ© on
h oven
ĠV ichy
ĠO H
me ister
ĠKey stone
ĠRip ley
Ġellip tical
Ġfin ishers
Ġhards hip
×Ļ ×
or am
ĠL oh
Ġopp oses
best os
Ġst ints
Ġpre quel
ĠBlood y
ĠJ y
Ġins urrection
Ġbre ached
ĠCon voy
E up
ĠT anya
ude au
ĠSt ay
Ġqu o
arn ock
ĠMus Ã©e
ĠSk in
T ai
ĠCast el
ion g
ĠT end
ĠT uck
od iac
Comp uter
>' </
b order
ave nder
Ġsl umped
ĠLog ic
ĠBabyl onian
R ail
ĠMar u
ĠGiac omo
ĠFl ame
ĠMark ham
ĠO sk
ĠY vonne
ĠCount s
ĠDec lan
ĠEn ough
ĠBat ting
ĠMann heim
C irc
L ew
Ġsol os
Ġprogress ing
ĠAny way
ĠH ospitals
ĠO ral
Ġaer odynamic
ĠCollect or
Ġfellow s
ĠJacob ite
ĠBhar atiya
pill ar
ic io
Ġpoison ous
18 87
ĠM ub
ĠWyn n
ĠGabri elle
iss ary
ĠPh oto
ĠTra vers
Ġpir acy
U nd
p osition
ĠW Ã¼r
Ã© nez
ĠNep ali
er en
ĠP t
ĠP ann
com ment
Ġempower ment
ĠH earing
ĠN F
ĠGr imm
Ġun not
ĠShe ng
ĠSa ud
ĠT ern
ĠCh ah
Ġser ials
ĠKn icks
ĠDown ing
ĠFaulk ner
og onal
Ġouts ider
ĠT ogo
isc hen
Ġbar ren
]] .
ĠUnivers itÃ©
Ġg eck
ust rious
ĠPal ma
ĠS aur
Ġprow ess
Ġf ran
est ation
Âł Hz
le i
Ġre incarn
ri j
ĠMan z
Ġenc rypt
Ġparap et
Ġ17 4
Ġdark ened
ĠConcord ia
ocaly ptic
ĠMin ogue
ĠMinor ity
ĠHav illand
Ġhect are
Ġmobil ization
ĠK oll
ĠCon struct
ĠTurn bull
ĠDoct rine
ĠCh ik
Ġkey note
Ġproject ile
ĠGran ville
Ġmicros cope
B or
C ivil
ĠF usion
Ġap ical
Ġepid em
r ang
os ers
E ric
Ġdo omed
Ġm ole
ĠBe en
z ko
ĠL land
Ġwill ingly
Ġtravers ed
os us
ĠEl le
Ġadministr ations
Ġsyn c
ĠÐ ½
Ital ia
b odied
ic ists
Ġbud s
ĠD ek
ĠPol lock
ĠFant astic
ĠAuthor ities
Ġrecre ated
ĠWolver ine
ĠDrug s
Ġunde veloped
Ġpl ausible
ood oo
3 30
but z
Ġs ited
Ġe ternity
ch anted
ĠD L
ort e
Ġresult ant
Ġdem obil
H alf
I ran
act ivation
ĠGr av
Ġstar board
ĠGo gh
ĠLey te
ce a
ĠJ ai
ich ord
Ġtrain ee
Ġbri bery
ĠL ips
ĠPat na
Ġparish ion
Ġcontent ious
ĠUrs ula
Ġs ands
ĠJ C
ĠEug Ã¨ne
Ġregret ted
ĠEspa Ã±a
A qu
ĠM L
Ġeyew itness
Ġy arn
ĠCal vert
ĠMaced on
Ġdetr imental
Ġt asted
et ano
ĠAn sel
Ġbat tered
ĠD n
ri ff
Ġtrans m
ĠBur d
å Ĳ
Ġg arlic
ĠC ope
ĠEl sa
bre eding
Ġexpans ive
k os
Ġrod ents
ĠSham rock
ĠGr is
18 65
ĠRock well
f on
ch rist
ĠTh istle
Ġred emption
t ight
Ġam az
ĠBl um
Ġwait er
H ugh
ĠCh ish
iy ev
ĠHy p
ĠP overty
Ġren al
Ġcross roads
ĠGu el
Ġchoir s
ĠCh ocolate
Ġtoler ant
B ell
ut u
ĠAz ores
ĠLog istics
ĠMcP herson
Ġst ool
Ġco ax
Ġammon ia
Ġc oy
Ġgr ille
Ġfl otilla
ĠSolid arity
ĠUn i
Ġlaun cher
Ġreun ification
Ġoverc ame
ver ts
if ts
ough by
Ġmet ic
ĠCru iser
G ro
ĠIsa iah
ĠMarx ism
Lith uanian
Ġev ap
c ert
ĠH idden
ore e
ĠMe ade
ĠQue zon
ĠDel iver
F ront
Ġfulf il
Ġstabil ize
V M
h h
ĠAst ra
ĠM ira
ĠMand ela
S yn
Ġaccount able
ĠVe get
ĠReport ing
ĠAl ien
Ġtest ament
Ġcorpor al
ĠSalv atore
Ġinexper ienced
ish able
uch amp
ern o
Roy ce
ĠP izza
Ġit iner
Ġband its
ĠHob bs
ĠDisney land
ĠB low
ĠGamb ia
ĠPug et
ĠB ourg
ĠEnglish man
work er
Ġchair person
Ġquarter final
ĠDave y
Pal atinate
Ġspawn ing
N ep
ĠF aisal
ĠTrans lation
Ġurg es
ĠMater ial
Ġcan ons
Ġmigr ating
ĠMedic are
ĠMÃ¼n ster
and ers
Ġtrans ient
ĠSm ol
ĠCut ler
Ã¼ck en
Ġr he
g ain
Ġ16 61
ĠD anger
Ġal b
Ġuniform ly
ĠHawth orne
al pur
ĠU pl
ĠPr ima
ot omy
Ġregular s
ens ch
ĠFe ast
ĠUN C
Ġisol ate
ĠEff ects
Ġsumm ons
Ġbarg es
J uan
Ġfl or
East Enders
Ġto ast
Ġsc aling
Ġrich ly
Ã©l Ã©
ouns ell
p ipe
ĠTh orne
ĠL CD
ĠRe uters
Ġrh iz
Ġh ires
ĠB L
Ġins ulation
ĠJos iah
K K
Ad v
Ġconfig ured
Ġpedest rians
ĠSy kes
Ġb isc
op rop
ill ian
Ġinvestig ates
ĠStr ang
Ġper m
Ġ erg
s ummer
ĠH imm
other mal
ĠInd us
Ġsusp end
ĠBi ography
J et
ĠCl own
ech ua
ĠMy ra
Ġpl aques
ĠOld er
ag al
Ġch oked
ĠMac on
ĠShen zhen
Ġ16 42
Ġtw enties
Ġvari ability
rep ared
Ġaw esome
P ho
j m
Äģ m
cha ikovsky
Ġplural ity
ĠAval on
x s
Ġmet adata
ĠPar v
E c
ĠSign ificant
Ġspo iled
Ox ford
Ġlig and
Ġpremature ly
Ġre prise
ag uchi
Ġrepair ing
ov ia
ase y
can al
ĠDun ne
ĠMet calf
Ġfavour ites
ĠO ax
Ġbefore hand
ĠEm ory
mill an
A ction
Âł 14
br ain
ĠHug uen
Ġeager ly
Ġinvari ant
ĠMoff at
Ġm ug
Ġvis ibly
ĠUs her
Ġfragment ation
ĠC elia
Âł 7
Ġel ites
ĠDam age
La ure
Ġcon tended
Ġslaughter ed
M ade
ri ad
iz ong
Ġsn atched
abb age
ĠKath mandu
K ir
pass word
illing ham
T ay
Ġp ounded
ĠV anguard
umb ing
Ġamb iguity
ĠH eng
Ġmiss es
Ġregul ators
Ġcompliment ed
Ġsuccumb ed
Ġ2 18
ale a
Ġfabric ation
Ġcig ar
if lor
ĠInvest ments
ĠVic eroy
ĠBloom ington
Ġpsychiat ry
n one
sp irit
ĠTri er
Ġ ì
ĠWh ist
ĠBash k
ĠD it
ra ig
ts on
ĠSouth port
Ġpar atro
Ġfore arm
ĠRam ÃŃrez
Ġorb iting
Orig inal
Ġfl int
. ]
ĠUn ter
tend ing
Rem ember
Ġspark ling
C razy
ĠH ays
ĠW ien
ath lete
ĠVa ish
ĠS ailing
ĠC ame
Ġsens ual
Ġthro b
Ġflour ish
Ġlik eness
Ġo t
Ġsh aman
ai y
ĠFeder er
ĠUnic ode
ol on
ur on
me g
ĠSyn agogue
ĠEmm ett
Ġd iner
ĠOffic ials
Ġa ura
in in
ĠS TE
ĠI Q
ĠP ach
ĠAch illes
v ie
Ġbon uses
Ġcock tail
ĠLis zt
m ol
ĠJ aya
Ġrec uper
Ġstate hood
Ġbank notes
Ġbypass ed
ĠDev in
Ġa is
Ġvide ot
ĠBus es
ĠIgn acio
or st
ĠI W
ĠQu akers
Ġdun geon
Ġcontract ual
Ġlegisl ator
Ġdrum ming
Ġass ail
Ġnon linear
uit ive
ĠLou vre
Ġarm istice
Ġgr ading
ĠMil ne
Ġant im
ĠVan u
ĠIS U
Ex press
Ġlas ers
Ġbiom ass
ĠK ard
Ġst rait
Ġno isy
18 86
ĠConstitu ent
V oy
Ġchar ters
aken ing
ĠDougl ass
Ġmaj ored
ĠS all
Ġ16 70
Ġreact s
Ġwavelength s
Ġinterconn ected
ce y
ĠAct ually
ĠCour age
ĠAstur ias
ĠK und
hus band
S now
Ġab duction
ĠAfter ward
ĠDol ores
p aced
ĠEn rico
W ay
Ġset back
els en
Ġcommon place
Ġreact ivated
ĠAN D
or ff
ĠN GC
cap ital
ĠV Ã©
ĠChar lemagne
ĠJ asmine
ĠK B
ĠGall o
Ġguitar ists
ĠT rench
st rous
Ġco erc
Ġconstr aint
ĠPoll ard
ĠTul ane
ĠGaul le
ĠNational e
Ġdr illed
Ġtelesc opes
r ating
u ates
ĠA gr
ĠB ands
Ġfarm ed
Å ĵ
Ġseaf ood
ĠT G
ĠSh it
Ġrep ublics
Ġnear er
ĠCongress es
Ġá ½
ĠW oo
Ġarr ays
Ġsens ational
Ġjuven iles
S onic
ĠT ae
Ġreg ency
ĠSad ie
Ġf iddle
ĠK ow
Ġsur geons
che quer
Hol stein
f ew
ĠSpiel berg
Ġh oard
ĠO wing
ĠK illing
ĠSt ub
Ġam using
ma el
ĠDar by
b old
Ġb oulders
ĠRe h
ĠDar rell
ĠLab el
pir acy
Ġpap acy
Ġcosm etic
Ġfluct uations
ĠOrk ney
b h
im ages
Ġind isc
Ġimm ensely
ĠSt ump
ĠEll ison
ĠSab res
Ġfianc Ã©e
Ġ ery
ĠA ware
ĠN D
se i
Ġchild birth
Ġsocio economic
n ob
ĠJ obs
Ġup load
ph ur
ze j
ĠDor ian
Ġcr aters
Ġinterpre ting
ĠMate o
ĠTorn ado
Ġth inner
alle ts
ĠJam estown
ĠP ops
ch rome
ĠTor ch
Ġavoid ance
ĠLoc omotive
Ġward robe
Ġque ue
Ġreceip t
ĠCh r
z hi
ĠK aj
Ġzomb ies
em ate
az aki
pen ed
ĠTrans vaal
Ã¸ nd
um al
ard ier
uk an
ĠEth nic
( )
Ġsc ow
ĠLe ith
ĠCop p
ĠT aunton
ĠAss ault
ĠAm rit
ĠBah ia
Ġpl ut
Ġacc ents
ĠCor a
Ġlog ged
Ġoverd ose
Ġwhor l
R uss
class ic
Ġdiver t
ĠCal iforn
ĠOd in
ĠDow ager
he it
ĠF isk
Ġder ivation
k Ã³w
Ġtr averse
ĠRe ferences
Ġeng ravings
Ï į
ĠA ph
no ons
ocument ed
op oly
ĠDec k
ĠN adia
Ġconc ussion
ĠHum ans
ĠPue bla
ietz sche
M att
ĠLi echtenstein
S ound
ĠC TV
Ġhe res
Ġoff ender
ll an
Ġscript ures
W onder
Ġnational ities
Ġir ony
Ġsynchron ized
Ġin line
Ġserv icing
ĠGl adys
Ġd uchy
Âł L
Ġ16 88
int estinal
Ġsyll ab
ĠGlend ale
c ribing
ĠHe aly
ell as
ĠFr idays
Ġens hr
ĠMess iah
t est
Ġast rol
V II
ĠAnt igua
ĠMark ets
ĠVehic les
18 50
P rim
R ap
ĠD arn
Ġsl ick
AC E
ĠBerg man
ĠEy re
00 1
". )
ĠSP D
ĠTes la
ĠW alth
ud u
ĠOlymp iad
Ġlog istical
ĠKitchen er
Ġinv al
Ġnight ly
Ġdev oid
Ġfung al
Ġcrystall ine
ĠÃİ le
ĠMu h
F er
con cept
Ġclim atic
se k
Âłm etres
Ġconsult ants
ĠGam er
Ġp enny
ĠP s
p ie
Ã§ e
Ġdial ogues
m ax
y k
Ġfing ert
K enn
ans a
Ġang led
an alysis
Âł 10
Ġref resh
ĠCong olese
ĠArm and
Ġflav our
ĠVul can
ĠE N
ĠAn ime
ĠBe es
Ġ %
ĠE uros
Ġwitness ing
Ġf use
ĠMal acca
on en
el as
isc op
Ġign ited
Ġstem ming
ĠBedford shire
Ġsplend id
Ġl icked
ĠAc re
Ġmerg ers
Ġstream lined
Ġgro cer
H ang
ĠP ony
Ġann um
ald a
ys s
Ġresear ches
ĠDh arma
ro red
Ġaccess ory
Ġpod s
Ġboost ed
ic ator
cur rently
Î¿ Ïħ
fig ured
ĠFest ivals
ĠÂł ĠÂł
Ġ0 2
ĠInter collegiate
Ġmoment arily
ĠM alk
Ġcivil izations
uls ive
ĠHab ib
ĠA ver
ĠE co
ject ion
ĠAm id
Ġbur d
ĠEx erc
ĠBeat ty
ĠIntro duction
ĠB anda
ĠP eking
ĠW anna
ĠBar re
ĠMah a
Fre edom
in ac
ĠN oor
Ġdomin ates
ĠMade ira
feed ing
ĠJ ou
ame h
Ġdec imal
ĠSem in
ĠOs born
Ġscrat ched
Ġt i
re ich
ĠEn field
Ġsynd icate
t ails
Ġpolynom ials
Ġfianc Ã©
an id
and ering
res e
Ġp uff
le on
ĠPe ugeot
ĠHaw kes
Ġparch ment
i oms
Ġtemper ament
stant ial
ĠMod i
Ġdoubt ful
ĠMor avian
ud h
Ġdist rust
Ġnan ot
ĠT essa
ĠA is
raft on
Ġabnormal ities
ĠArm istice
Ġdecre ed
ĠB E
ak ens
Ġle ases
ang ling
Ġrem inding
ĠBe et
Swed ish
Ġgoalsc orer
Ġbeg s
ĠWals all
ophil ic
ĠJ eb
Ġ17 07
Ġcur ate
Ġeng raver
Ġbat ters
Ġwid ows
Ġvo ic
Ġoutput s
ĠVar iety
ĠUn iform
ĠRe habilitation
ĠGold stein
ĠCas ablanca
ĠScr anton
S ty
Ġlay ered
Ġclock wise
e as
ĠMcG uire
ĠGonz aga
ĠL ister
oc ious
ore st
18 84
bed o
ĠP ats
Ġexp ects
Ġill iter
ĠLag oon
ĠMol ina
ĠN aga
Ġk ar
Ġcomp ute
Ġsol ids
Ġshr ink
ĠMul der
Ġa ph
Ġg otta
Ġapprent iced
Ġgl azed
Ġliquid ation
Ġneglig ence
Ġsh ack
m ara
Ġround about
ĠB arrie
ĠK ers
transfer ase
d eck
ĠK G
Ġnum b
eth a
ĠOt ter
G ener
ess ler
Ġgu ise
oc re
ect omy
Ġle opard
ĠDal ai
Ġtent ative
T U
et ra
ĠL aird
Ġplung ed
ĠKÃ¶n igs
Ġimpe achment
C osm
ĠF ail
ĠSt ag
ĠVeter inary
f en
ĠG ift
ish u
ĠMag uire
Ġcommand ant
Ġh i
ĠBr ave
18 68
ĠMin ers
Ġpil oted
ĠGam ble
Ġcreek s
k ap
Ġster il
rev eport
ad am
Ġprov ocative
Ġmater nity
ĠB f
ĠLe ach
def unct
ĠFab ian
Ġconstr ained
Gl obal
ĠB iss
18 00
udd led
Ġinter tw
Ġconc ub
Ġcond ensed
ĠX ing
12 8
em es
ĠD ax
ĠL ulu
ĠTr ilogy
Ġdisc us
Ġpar cels
ĠHar court
ĠDor chester
ĠKep ler
an ine
ĠB akers
du k
Ġreb ound
Ġpuzz led
Ġbol ts
fter s
ĠPo ets
Z e
Ġmarked ly
ĠSom erville
ĠRic ci
N ich
Ġharm less
Ġgro oves
Ġmagistr ates
ur f
Ġv ans
ater ial
Y ork
Ġbreak out
ĠSel angor
ĠTrou ble
Ġf ielder
om ial
ĠAr royo
Ġexp onential
al m
er es
Ġp aced
Ġaccommod ations
Ġho ax
Ġfright ening
ĠMc Queen
ĠMac D
c ens
ç Ķ
Ġcontin ual
Ġshut ting
Ġ6 000
iam en
irc raft
ĠIslam abad
Ġbreath s
Ġspect acle
P en
he ter
ĠSt ry
Ġbullet in
Ġalarm ed
ch anging
Ġ3 25
Ġcondem ning
ĠWN BA
ĠLark in
ĠS int
ĠS MS
ĠHy undai
ĠL eroy
ason able
Ġren ounced
Ġpay roll
c ape
Sp in
Ġwel terweight
Ġp ains
ĠA us
Ġy anked
ass en
ern a
Ġob long
pe ak
Ġinn ate
Ġmic roscopic
Ġirrit ation
ĠF unction
ĠW ither
ĠSal man
ĠHay dn
ĠByzant ines
ĠVas ily
ĠNiz am
C orp
K evin
R ing
Ġcl ones
ĠPart ner
Al though
ram an
Ġtheat rically
Ġwater way
As ia
k et
ĠC anning
amed a
Ġpro ps
six th
ĠVot ers
i ata
12 4
Ġemb ro
ĠGonz ales
Ġneat ly
ĠNguy á»ħn
ĠGe le
Ġcr abs
d raw
ĠOr te
ĠWill am
Ġarr ivals
Ġthr illed
Ġscar let
ĠFÃ© in
Ġsh udd
Ġcap p
ĠStan isÅĤaw
ĠEc cles
Ġendeav ors
ĠBellev ue
aw l
Ġins ults
Ġaffili ations
ĠKar ol
ĠG our
ĠPat ients
ĠBry ce
ĠPeters en
ĠPat ti
ĠFuj ian
or idae
ĠY at
ash vili
ĠCh atter
ĠDet achment
Ġexpans ions
iz hou
Ġper for
Ã¡z quez
Friend s
ĠB iot
ĠJ op
Ġcoll isions
Ġhind ered
ĠMod er
Ġre appeared
orn is
ug i
ĠCop eland
Ġflu orescent
Ġvest ib
Ġextr ater
Ġstand out
Ġstre aks
ĠCop tic
Ġlon gevity
f ix
ĠB ays
ĠSc ale
ĠHop per
n ae
ĠHil bert
Ġthy roid
b idden
Ġback stroke
Ġe arthen
Ġk idding
Ġheart beat
Ġtor rent
ĠKath arine
"/ >
Columb ia
if ting
ĠMyr tle
Ġb ans
ĠS AM
ĠMin eral
ĠHam let
Ġâ Ħ
Ġequival ence
o ors
Ġf oyer
Ġplace holder
Ġcat ap
Ġplann ers
class ical
Ġtrigg ers
ĠG NU
ag gy
Ġval uation
ĠPy th
ĠKay e
ĠN ana
ĠU pton
y our
12 1
Ġoutlaw ed
h ung
ĠPsych iat
Ġdispers e
Ġamph ithe
ĠF ij
ĠN Ã¼r
sk ine
Ġcere al
á½ ¶
Ġad herence
Ġag n
Ġplot ted
G ran
ic its
nt z
ĠPer c
Ġsupermark ets
Ġchamp agne
ant as
Ġproject ive
ĠCle opatra
Ġreign s
Ġneed les
Ġast hma
Ġrent s
** **
Ġtom ato
Ġmoll usks
is el
ĠArt emis
Ġmess aging
ĠLes bian
ĠScreen play
B ase
V el
ĠT osh
Ġcont r
ĠHonour able
re el
it iveness
ĠDyn am
ĠRut land
ĠMarri ott
Ġn ymph
ĠDivision al
ĠMont rose
Ġpath ogens
threat ening
P or
s berg
id us
ĠE as
ĠC ray
Ġmar red
Ġre classified
gr aduates
Ġbar ric
Ġex ternally
per ate
ĠWal nut
Ġexacerb ated
C s
ad ically
Ġout field
orth odox
Ġline ages
ĠRep l
T ry
ĠG ospels
ĠCh amb
Ġhypothes ized
3 80
ĠMiss ions
ĠSk ate
ĠProm inent
d uring
os ha
Ġcharacter ize
Ġgas p
ĠKon rad
ĠDomen ico
f ocused
ell ations
ĠPro ced
Ġgun shot
ĠHur ley
Ġliqu ids
Ġproud ly
Ġdiagram s
pret ation
d ry
im at
Ġtake off
Ġsort ing
V iet
ĠC G
ĠSome how
Ġirregular ities
ĠC il
Ġres isting
Ġsl iced
ĠDul uth
ĠQ B
Ch apter
Ġx en
F ly
ĠR app
Ġpal er
M W
Ġcounter fe
Ġappropri ated
Ġjersey s
Ġinc omes
Ġantib ody
â Ī
Ġb if
Ġperf ume
Ġgr asped
ĠTor ino
All Ã¢hu
Ġcontradict ory
Ġ## #
Ġmut ants
Ġban jo
Ġinstinct s
l n
Ġad am
ĠPl anck
ĠDust y
Ġr hin
ĠCh arm
iz en
Ġbook store
ĠC orm
Ġth rom
ĠCrist ina
Ġovershadow ed
ĠW oj
ĠPar th
ĠRoyal ist
Ġgro in
ophyll um
c oin
Ġp sal
rich t
ĠD airy
ĠCro ok
ĠOdys sey
ĠG raphic
Ġpri zed
ĠDo herty
Per fect
Ġdis j
Ġdrap ed
ĠO nd
ĠAnd rey
ĠWill oughby
ĠCov ent
Ġcarb ure
O cean
Ġsouth wards
Ġter rifying
ĠNew ell
Ġscript ure
ĠBarr ington
M ov
ĠChap lain
Ġaug ment
Ġf oe
Ġc ipher
ĠSup ers
ĠGet ting
Fred erick
re h
ĠG eb
ign an
Ġaut opsy
ĠCow an
Univers al
Ġd arts
Ġ29 0
ĠÃī ireann
D uring
Ġcomp artments
N ap
ĠT B
Ġde formation
Ġpar amed
ĠBoard s
ĠC ine
Ġe uthan
inter pre
lad en
ĠLon ely
ĠCol ored
Äį ek
ov ac
ĠV HF
Ġexist ential
ĠGal ician
Ġout flow
ĠProp ag
18 82
ĠChamp agne
Ġcritic ize
Ġellip tic
emb rane
18 83
ĠSup porters
Ġp aving
ĠCo at
IC EF
ĠStrike outs
ĠT chaikovsky
Ġerrone ously
Ġb ribes
ĠM azz
Ġsl og
ĠBog dan
Ġadul tery
in ator
ĠIdent ity
Ġant ic
Ġatt en
Ġfl ap
ĠCro ck
ĠMinn ie
Ġnotice ably
ĠAny one
ĠLan ark
sens itive
ĠDar ryl
ĠMain stream
Ġbapt ised
Ġbe hest
ĠN oon
ĠHat field
Ġabort ions
ĠL ash
ict ional
Ġshel ved
Ġboot leg
H um
ĠAs cot
Ġhards hips
s erv
t ogether
tern s
Ġ17 47
akrish na
Ġwast ewater
ĠDaup hin
ĠG ue
ral e
ĠIm ages
Ġt ides
Ġdem ographics
ĠCow boy
Ġfil tered
ĠConserv atoire
E sc
Ġfl ung
ĠAn war
Ġroom mate
ĠRo han
He aven
ĠChi hu
Ġunnot iced
Ġcons erve
Ġ21 1
ĠStr anger
FF FF
Ġf rie
ĠN ol
Ġpasser ine
Ġun fit
Ġflo ats
ĠMer ch
Ġsuperv ise
Ġdent ist
ĠH odge
urn ey
Ġreg ression
US D
om ir
Ġ17 27
Ġphot on
ĠBarb ar
Ġb umper
ĠCh ab
ĠOlymp ian
d ers
Ġp as
ak t
ĠK ota
Ġcr an
g auge
Ġsup erg
ĠPh ar
ĠBull ock
UN Y
Ġprofic iency
Ġcook ies
Hol lywood
ĠBhar at
ĠEstr ada
ĠM igration
Ġdile mma
ark hand
Ġelectro de
Ġapost olic
A N
O lymp
av it
Ġ16 85
reg istered
ĠHar p
Ġmush rooms
å ±
ĠM ound
ĠMus e
ç İ
ĠM age
ĠTr ades
18 71
ĠBar ron
Ġflav ors
Ġeman cipation
Ġre opening
ĠW O
G az
ĠIn quisition
Ġsh ivered
Ġsol uble
SA C
ĠFay e
ĠSarg ent
S B
ĠG row
18 81
à¥ ĩ
G all
b ast
c ie
Ġsup per
Ġprop ellers
ĠSpr inger
Ġpal ette
ĠBot any
Ġaggrav ated
ĠM EP
Ġre open
ĠH avel
ĠG enn
ĠZ w
Ġdiscont ent
Ġtheolog ians
st yl
ag lia
Ġass ort
Ġdi arr
Ġstep mother
ĠVoc ational
Ġs ired
ĠP RO
ĠG aj
ĠReich s
Ġdisqual ification
ĠSÃ¼ d
Ġse izing
ĠV ila
Ġhum ming
Ġfashion ed
I CA
ĠC att
Ġins anity
ĠPlay offs
mach ine
W V
b b
Ġh over
ĠK N
ĠV ib
ĠBa hn
bal anced
à¥ Ģ
ĠSt ack
ĠZ oro
Ġmet ast
G i
Ġun affected
ĠCont roller
met ry
ĠCh app
Ġselect s
J er
ĠK obe
ĠMar ge
Ġbenef actor
he ard
Ġfundra iser
A ud
Ġbl uff
Ġgrass y
Ġback yard
ĠTur tle
ĠRank in
Ġparl or
Ġa ur
ĠSwed es
Ġult ras
Ġel oqu
Ġmem o
ĠFitz patrick
ĠE uler
ĠSÃ© rie
t ax
op ian
ĠCh ol
ĠSay y
Mur der
ĠA ird
Ġpict ured
Ġharm onies
Ġliberal ism
ĠCho ct
Ġd ocked
iv ating
pt y
ĠUnivers iade
ĠMcLe od
Ġcondem n
ĠSmy th
ĠMaver icks
Ġd rones
Ġbillion aire
ĠMand ate
ĠCert ified
ĠParagu ayan
ĠFasc ist
ĠV F
uch us
ĠCarm ichael
Ġtoler ated
ĠK rup
ĠV ett
go al
sec onds
Ġview ership
Ġmemor abilia
ĠP sy
Ġsequ ential
Un cle
ĠAud ience
ĠEras mus
Ġg on
Âł 30
ĠPh one
Ġsw ings
ĠFair child
ĠAgg ies
ĠReg istration
Ġcam el
Ġimper ative
ip oli
ĠTh a
Ġsign age
Ġ0 3
Ġm ish
ĠC iv
Ġcost al
ĠSim ons
Ġwood y
Ġenact ment
h p
Mon ster
Ġsubordin ates
8 50
N ice
Ġdel ine
Ġjuris prudence
U F
ĠAr jun
ph ire
ĠGro ver
Ġk arate
Ġup ro
12 2
ĠNorm a
fig ure
N ine
ĠR ook
ĠSl ayer
bet ter
ess ing
ĠCorpor al
Ġgard ener
s ent
ol ishing
ĠMart a
Sh adow
Ġstore ys
ĠNat alia
Ġwarl ord
C M
ĠG ins
ĠScot ch
aug a
R ae
op lan
Ġcompens ated
j una
Ġsurpr ises
ĠUs ed
m os
Ġh ike
Ġdepart s
Ġher bal
Ġaud itory
Ġmir rored
ĠHav re
ĠRaz or
ĠTri assic
aver age
ĠPok Ã©mon
Ġd ell
ĠR iemann
ĠW BA
ĠCom et
ĠColon ies
ĠRevel ation
or ated
ĠPro blems
ĠCors ica
z ies
ĠAm ade
ĠWhen ever
ĠLa unched
ĠDon nel
olf o
ĠAnch orage
ĠCh ipp
Ġtaxp ayer
Ġsh rew
ĠLie ber
ĠSm oke
ĠBat avia
Ġmar ines
KÃ¶ ppen
ĠU FO
ĠSt rick
Ġen rol
Ø ª
at ron
Ġun r
ĠSc ala
Ġcrown s
Ġcollaps ing
Ġvacc ines
j en
ent es
Ġcheer ful
Ġa us
Ã¡ in
Ġmalf unction
ĠIsrael ites
C z
Ġs cept
ĠC PC
ĠG ans
ie ur
Ã± os
ĠErnest o
ĠAhmed abad
Ġske letons
æ ĺ
ant ing
Ġaccord ed
Ġune arthed
Ġdiscour age
Ġhesit ant
Ġretri eval
Ġnutrit ional
ĠD are
M iddle
u van
nes ia
ut sche
Ġ4 60
ĠSk op
Ġgl ove
ĠKings ley
ĠPros per
Ġcrim son
ant is
Ġdec rees
En cycl
te k
Ġdock ing
ĠScript ure
Ġsub units
Âł 18
Ar my
ĠDist ance
Ġju xtap
Vict oria
ophys ical
Ġencir cled
×ķ ×
ĠFound ing
Ġcam er
ÈĻ i
Ġamphib ians
Ġmisunder standing
Ġlaw ful
bre akers
ĠW agon
ĠJoh anna
ĠVanu atu
li ant
Ġmaster y
Men u
Ġverte brates
Ġg h
Ġ15 50
ĠJames on
ĠS PA
ĠP atch
ood les
Ġcult ivate
Ġeast wards
ĠBrah min
x el
Ġ23 5
it el
ĠW aste
Ġv iv
ĠMill wall
ĠTest ing
Ġcris p
Ġovert urn
g ill
at ma
ug o
Ġbl aming
Ġentrepreneurs hip
Ġcerv ical
ĠYarm outh
ĠTor quay
gl as
rud ing
ĠÃĨ thel
Ġd otted
Ġac oust
ĠAnn ette
Ġaven ues
K ent
d oes
Ġmin ted
Ġhand held
Ġserial ized
ĠRou en
ĠChop in
Ġfug itive
op od
Ġoff season
Ġdec ap
ĠPir ate
C ode
ĠS ule
ĠCay man
Ġprogram mers
ĠMad ness
Ġspor adically
n uts
Å ł
Ġb ounce
ĠA NC
ĠK aun
ĠCol our
Ġmed iation
omy c
Ġintrig ued
D eb
ĠFr anch
Ġembr acing
p ure
ĠCar path
ĠMag na
ĠF enton
ull en
be aut
ĠUp anish
ol ed
Ġlong standing
ĠPort e
Ġworry ing
ĠIgn atius
Ġtrump eter
ĠWitness es
ĠD F
Ġ17 41
ellig ent
ĠSn ap
Imp act
P N
r c
u ya
Ġb os
ĠD ov
ĠAr am
ĠAp ocalypse
ĠPin to
Ġramp ant
ĠE gan
ew are
ie k
enn ia
ĠOlim p
Ġg ird
Ġrel ic
i aceae
Ġ22 1
Ġsam urai
F ast
Ġassim ilated
S qu
Ġh ither
ĠD ian
Ġhum iliation
Ġseem ing
ĠGuatem alan
Ġspont aneously
W itt
inc re
Ital y
ĠWins low
w ells
am weight
ĠM ention
Ġaccompan ies
Ġasym pt
ĠD inner
ĠBomb ers
ĠIntegr ation
ĠD ok
ES S
T rib
Ġc rescent
ĠN are
ĠK L
erson ic
ĠBalf our
ĠGe ographical
Ġrac ially
Ġutil ised
Ġech oes
ĠBert ie
Ġl ute
IS S
Ġliber als
Pr ussian
c ery
ĠC ess
Ġemp ress
Ġmit igate
Ġnec ks
Ġdissem ination
ungal ow
D og
ĠU D
Ġ3 10
Ġpower house
Ġharm onica
Ġscarc ely
Ġhe ap
Ġ20 7
ĠO mn
Ġelect ing
Ġbro ok
ĠBrew ing
áº ¿
Ġchant ing
Ġthw arted
ob u
Ġconst able
ĠCor onation
ĠFerr is
ĠHuff ington
Ġ È
ripp s
it entiary
Ġopt ic
ĠDust in
Ġreform ing
ĠMir age
ĠUy gh
Ġletter ing
Ġcold er
Ġvagu ely
G rey
ol us
Ġout raged
sh ould
Ġais les
Ġb acon
ĠP seud
Ġnet ted
ĠSuccess ion
V T
h ron
ĠB reg
O E
ĠGu id
us her
Âł 27
Ġfract ures
ĠSchu bert
ĠM ID
ĠJ ens
ap as
ĠHart le
ab er
Ġout ing
Ä± m
ÅĦ ska
ĠCP I
Ġconvert ible
Ġbund led
Ġintrig uing
il age
ĠCon ception
ern acle
ĠPres erve
Ġkil ograms
Ġelect rically
ĠGl adi
Ġadmin isters
ĠGem ma
Ġextract s
Ġc akes
ĠD aryl
ĠJ J
Ġfet ch
ĠRay on
Ã¸r n
sty led
phosph ate
Ġnause a
E gypt
ĠS mit
ri ya
ĠK j
ĠY er
Ġpar alysis
ĠAcc reditation
ĠGreens boro
Ġundermin ed
ro bor
ec in
ĠE ste
Ġimpl ication
Ġab olish
sup ported
ĠMilo Å¡
Ġre el
cl ubs
Ġnost rils
ĠEspa Ã±
Ġoriginal ity
de velopment
Mar c
ĠSey chelles
an ese
Ġ17 53
Ġdem arc
Par ad
ĠMild red
ĠSil as
anth us
M ind
ĠB ex
ĠAl brecht
18 61
Ġhypothes es
Ġbipl ane
eb o
ĠOlive ira
Ġ20 9
ĠY os
ĠBl ond
18 75
ĠDev lin
ĠÃģlv arez
Pret ty
Ġqu ir
ik ed
Ġ15 40
min i
ĠFrench man
Ġlandl ords
S el
Ġp ious
ĠH eller
ĠMagn um
ĠI q
EC D
ĠEarl s
ĠC AS
Ġre brand
Ġviol a
ĠKick starter
Ġsou ven
Ġunfavor able
ĠAmbul ance
Ġin und
ĠSound track
Ġfl icked
ĠHeming way
ĠPro ceed
Ġcar bohydr
t aught
is z
to oth
ĠFre ight
Ġimmers ed
Ġque er
he b
Ġr azed
ĠMar ried
Ġtut elage
Ġirrit ated
ĠCandid ates
l ak
ĠW inning
Ġcl am
ĠMad den
Ġrom an
ĠCas imir
Ġfer mentation
ing house
ch rom
ĠBr no
ĠMc E
Ġgl ances
alt z
ĠBreed ers
, <
u rom
Ġd or
il ts
ĠB rief
for s
V iew
Ġfl irt
ĠBol t
ĠOrdin ance
Ġap opt
William s
Jim my
ĠRe ach
ĠBrom ley
Ġhug ely
ĠOax aca
Ġspons oring
ĠBrig ades
Ġhem orrh
ĠHep burn
I raq
Ġsc aff
Ġform ative
erc us
ĠAld ers
rav iolet
log roup
ĠC ust
ĠD ancer
ĠF irm
ĠMon ty
ĠOrgan ic
Ġorph aned
Ġsubgen us
ĠK arm
ĠTechn ological
Ġwear y
cell ent
Ġembry o
Ġvom iting
Ġco ex
Ġunc over
il ius
Ġg ull
form at
ĠCompar ative
ä »
Ġin accessible
ond ale
ĠReg ulatory
å¤ §
S us
il ate
ĠH agg
ire z
Ġind oors
ĠBat talions
w ani
at ari
ĠN ietzsche
ĠTr udeau
Ġconf ederation
Ġrecre ate
ĠMagistr ate
ĠDou bles
Ġsort ies
ĠComp act
ĠPen elope
Ġadop ts
ĠSur geon
ĠHind ust
Ġsell ers
ĠAmb ros
ĠChar ley
K C
port ant
ĠAsh ok
ro pe
Ġre iterated
st asy
Ġv iability
ĠV ita
iy eh
ĠFour teen
Äį a
Ġlon eliness
Ġpenetr ating
ĠF ianna
Ġprom o
M ess
Ġr acket
ak arta
ĠPr ud
ĠMer ritt
ĠSok ol
it r
Ġpl ough
ĠY ash
Ġjournal istic
ĠParticip ants
ĠKarls ruhe
ĠCh ill
Ġart ific
ĠAct on
H as
ing led
ĠMe i
Ġmal icious
ĠFilip inos
ĠBibli ography
Ġexcer pts
Ġm alt
ĠSoc rates
ĠEn och
Ġparad ise
Ġfor age
Ġpe g
ĠAcc ord
ĠChe chen
ĠSub marine
Ġhero ism
ĠC ym
ĠD D
ĠIn ca
") :
ĠOccup ation
c all
iv ided
ĠD ess
adem ia
Ġlo os
Ġcustom ized
g ay
Ġle asing
Ġsm ash
ĠSouth land
In v
Ġtransl ucent
ĠKam en
s uff
ĠC els
Ġ20 3
Ġafter noons
Ġcr anes
Ġmo at
eff ect
Ġb ounc
Ġl ooting
im ag
ĠU k
ĠSh reveport
ĠSoy uz
ĠMet ropolis
Ġbed rock
ĠT RA
ĠBo ch
ĠGill es
Ġskull s
ĠB ells
Ġdist al
2 30
b road
an am
igr ant
EE D
ĠMess ina
Ġt ern
ĠN ub
ace a
Ġfre ighter
Ġstar ving
Ġsubmit ting
ĠC s
Ġchar iot
å ľ
ol ver
Ġgener osity
Ġtowns people
anz as
ĠFer reira
ĠSon ora
Ġadjust able
Ġende avor
Ġimmort ality
Ġsin us
T L
ĠFI VB
Ġgri pping
Ġherald ic
Ġl ore
ĠSt rom
con form
Ġheaven ly
ĠAl ly
ĠEr skine
c ass
Ġp ens
ĠBl aze
Ġflour ishing
Ġb oulder
om aly
ĠKe ane
Ġcir cled
week ly
pell ier
Ġh overing
ĠT ic
ĠH osp
Ġret racted
ĠRel ated
Ġcann ibal
Ġard ent
ĠCh arge
ĠBl og
am ore
ĠFr ag
ĠWain wright
Ġgroup ings
ĠRem ington
vens kan
r ings
ĠW I
Ġbip art
Ġmassac res
Ġnodd ing
H ou
Ġover coming
ĠBl ast
ĠMed als
ĠCle ments
hy nch
Ch ancellor
ĠTer re
Ġoverth rown
Ġon c
Ġpress ur
Ġlabel ing
Ġenrich ment
D uke
b row
ort a
ĠBrough ton
Ġw arden
ĠRoy ale
Ġsugar cane
Ġlod ging
ĠMagdal ene
adys ÅĤaw
Ġfl am
aly tic
ĠSure ly
Ġcons ulate
box ing
ĠWare house
Germ ain
Ġr apt
zz le
Ġcontinu um
Ġrepr im
ĠLiving stone
ĠHammers mith
ĠEl f
Ġinterview ing
ĠDoll s
Ġpanc reat
ĠAr ct
ĠWy nd
Ġobsc ured
ĠCatal ina
Ġbart ender
un er
io id
Ġrect ory
Ġw inked
om us
sh ots
ĠSec rets
ĠPre liminary
B Y
ale e
ĠPe ach
Ġcomplement ed
ĠHimal ayan
ant own
ret te
Ġor deal
ock ing
Ġple ad
Ġassass ins
ĠD ey
ĠBir ken
Ġculmin ation
ĠMagdal ena
Ġchieft ain
18 77
Ðµ ÑĢ
Ġlaund ering
S earch
Ġhead lights
Ġimp ass
ĠLaz io
Ġen amel
end orf
ald ing
ĠLeh man
ĠP Äģ
Ġ16 41
min utes
ĠAnn ex
Ġsupplement ary
prop elled
op ardy
qu ite
Ġ7 20
ÏĦ Î±
ĠLibert arian
Sar ah
ĠK up
Ġsp ed
ĠMarch ing
Ġd usk
ĠSch Ã¶n
ĠDun lop
Ġampl ifiers
ĠT id
ĠB read
ĠIsf ahan
Ġs ocket
ĠDep artments
Ġrum or
Ġhaun ting
Ġisot ope
Ġcl icked
Ġequ ator
ĠDav y
Ġcaus al
ĠCelebr ity
u ition
eb a
ĠWest field
ĠTar an
ĠSch oen
Ġkind ly
ĠJ ena
oc er
Ġtw ists
Ã¸ n
ĠEcuador ian
n all
Ñ Ī
Ġbelie ver
ĠSem inole
ĠAnat omy
ĠSh ade
the se
Ġpat rolled
Ch amp
B alt
os ke
Ġball ast
Ġg entry
Ġshe pherd
Ġintern ment
rot tle
Ġm asts
ld om
ilt ration
ĠSub committee
Ġtaxp ayers
Ġr ug
Ġex erted
S EC
or ca
ĠO asis
at onic
ĠCal ais
ĠMcN amara
Âł 25
Ġdist illery
Ġsun rise
ĠC ards
lie b
ĠAnim ated
ĠD ann
ell aneous
ĠZ ab
Ġrestruct ured
Ġo str
ĠD ire
ĠZ ay
ĠBr ink
ĠTer ence
Ġintim acy
n in
ĠPro st
Ġtimes lot
ĠMer ton
ĠBre mer
ĠR aim
Ġar senal
Ġad ject
Ġrep elled
Ġcomplet es
) ),
Ġsh illings
Ġpolar ization
ĠRib e
Ġwas ps
te levision
Ġbill ing
Ġde forestation
18 79
Ġfurther more
ĠElect ed
ĠWind ow
ĠNep alese
Ġstabil ized
Ġnit rate
Ġb rawl
ĠReg iments
Ġmic roscopy
Ġharsh ly
F ace
all ic
Ġf eral
ĠI li
ĠMac millan
r ion
ĠWil hel
ĠHy brid
S ave
Ġb ribe
ke i
ĠRe qu
ĠBlack hawks
ĠInter im
ĠWool wich
Ġ20 4
aw esi
Ġ17 46
ĠSocial ists
ĠF itness
14 5
ece ased
ĠÄĲ á»
ĠT Ã¼
Ġon ion
ine e
Ġshow ers
Ġ16 43
Ġ21 4
ĠLuc iano
Cent er
å· ŀ
hed ra
Ġhoney moon
Ġd ermat
Ġon board
Ġde nd
ĠZ ulu
Ġcle avage
Ġspect rom
en ham
Ġover land
Ġsc i
aj e
b eta
as io
Ġroad side
ias is
ĠAsh ken
ĠHack ney
ĠM ole
if ers
ĠZ er
ĠZ ane
Ġgrad ers
S eries
ĠWor st
ĠG CS
ĠOr chest
aly st
Ġcod ed
ĠA ten
Ġspecial ization
ĠCass andra
ĠFac ilities
ĠCamb rian
ĠManch uria
R oger
uk k
Âł K
ĠSieg el
Ġsur mounted
yn ec
Ġrock ed
Ġax ial
Ġinvari ably
ĠPro blem
asc al
ĠInc ome
ĠManufact urers
J ason
L ow
ors ki
conn ected
ĠPe as
ĠSum er
N ature
il ial
ĠJan ice
Ġauction ed
ĠJh arkhand
ĠEther net
in st
ĠD ass
18 76
ĠAnt Ã³n
ĠHa ig
ĠVoj vod
i Å¡
Ġdown wards
ĠWhit aker
ĠHann ibal
p oor
Ġnight mares
pro gram
organ isms
Å« r
ĠHills borough
Ġrefere es
ĠGron ingen
Ġw iping
Ġsp lic
ĠAar hus
Ġfitt ings
Ġhur ts
Ġmoon light
ĠRout es
L l
ĠP ub
ug er
Ġprincip ality
Ġconstruct ive
L ead
12 6
Ġanat omical
Ġadminister ing
ĠAn sw
ĠPo it
Ġhey day
2 80
alt itude
Ġcat fish
ĠExt rem
Ġslight est
Hel p
out line
Ġdr ills
aut omatic
ĠLand es
ube i
build er
B ring
Ġgr inning
Ġtele path
b uro
t ory
Ġmod ifying
Ġcur ving
Ġpract ising
âĢ¦ "
ĠRoy ce
ĠD ard
ama ic
Ġwrong ly
Ġstrang ely
ĠI con
arl o
IS E
ĠTrou t
ĠJuven ile
L ib
ĠGr anth
Ġcongen ital
B h
ven or
ĠPrem ium
ol ite
ĠR anj
inc ial
Ġhard cover
ĠT imb
im ming
Ġinter ruption
Ġbl iss
Ġarrest ing
f usion
Ġb aker
ĠR agn
Ġlandsc aping
om ys
ish ly
ĠGre er
ĠRen f
Ġtrigg ering
Ġubiquit ous
ĠR OC
12 7
ĠChe valier
Ġbitter ly
ĠConsult ing
Ġrooft op
K an
Ġimpro vis
Ġdeton ated
b ia
ĠAl p
ose f
Ã« n
Girl s
Sp ain
ĠBrand t
Ġlip id
Ġapp ellate
Ġexc ursion
ĠBridge port
Ġlaure ate
Ġreceip ts
T echn
ol u
Ġcomm uters
Ġg ems
ĠSix ty
Ġcontrad iction
Ġsmir ked
ĠPal atinate
Ġche wing
ĠLiqu id
ĠSlo ane
Ġt resp
am ate
ĠGr imes
Ġprot ruding
Ġshoot ings
Ġliber tarian
ĠDunk irk
ĠAlco hol
Ġdel ic
Ġburg l
Ġbip olar
ĠN BL
K E
ĠB ans
Ġj avelin
ĠBl azers
G H
Ġsign aled
Ġmultip lied
Ġmock ing
ĠZimmer man
ĠTar as
ĠLun ar
ĠKhal ifa
Ġcess ation
ĠL arg
Ġdeb ating
ĠYellow stone
cle ar
gl uc
Ġurg ency
re i
ĠH ogg
Âł 23
Sy stem
ĠNue va
pr act
ĠCl ermont
Ġ16 44
ĠGreg or
ĠAval anche
Ġfl ared
Ġbund les
Ġg ala
ĠNov o
Ġmort g
Ġtot alling
ĠEditor ial
c uts
e ighth
m eyer
n ery
Ġconstruct s
Ġintr usion
ĠPione ers
Ġincarcer ation
Ġskirm ish
ĠA ki
ĠB uster
Ġ10 86
ĠSo il
ĠDel uxe
st ered
i ere
ĠM RI
Ġ17 51
Ġrep ar
ĠMal vern
Ġdiff use
ĠS ill
fess or
Every body
Ġabolition ist
H ope
ce um
ord on
bl ade
ĠSab re
dc dc
ĠDur an
il ogue
ark a
Ġ7 47
Ġext racellular
Pers ian
i ob
ĠM Hz
Ġg ad
Ġpar rot
ĠComp ass
ĠDo e
ĠDo ors
ĠC uc
ĠW ax
ov is
Ġple asing
iro t
Ġpattern ed
l Ã¡
Ġd olphin
ĠH enson
Ġy ell
ĠUm ayy
yst ok
geme inde
rie ve
ih ara
ĠAlg on
ĠDaim ler
R u
ĠMen on
ĠBrab ant
F ear
ĠL er
Ġcl eric
Ġdimin utive
2 70
c one
Ġend orse
ĠSand wich
ĠEps om
Ġal bedo
gh orn
Ġdisg usted
erm ost
Ġpred ation
Ġannoy ance
ĠT uring
ĠFilm fare
chi idae
Ġinspect ions
Â µ
ut ants
ĠCh ola
Ġtit anium
Ġelectron ically
Ġfut ures
Ġincon ven
ĠG ains
Ġ21 6
Ġcit ations
Ġp ensions
ĠF P
Ġsum med
sec ret
Ġmor p
ĠChaud h
T ro
ent own
Ġem it
ĠHamp stead
Ġcaut iously
ĠKhuz estan
ĠWalth am
b illed
y x
Ġin organic
Ġemphas ised
Ġwal let
ast rian
Ġall oys
Ġschool house
ĠNight ingale
K ol
ĠA ces
ĠW F
Ġbro thel
ĠDec atur
Ġs led
ĠN adal
ĠEn sign
ĠLo eb
ĠG off
inn on
Ġcar pent
k iss
Ġs i
Ġraid ers
ĠRey k
Ġcultiv ars
ĠA ks
ec r
ĠB uren
ĠH s
ĠFl inders
ĠYuc at
S ource
l ogy
Ġs ug
op han
ĠRe z
Ġdef iance
Ġob last
Ġult raviolet
ienn a
ĠIS S
k at
ĠD ac
ĠNag asaki
Ġsynthes izers
ĠInns bruck
ab as
Ġsc andals
anc ery
Ġinter m
ĠSam oan
Ġfru ition
Ġcor rupted
Ġfet al
e au
ab ric
Ġam ateurs
Ġ17 52
ĠPar as
Ġsal am
áº §
ĠIg les
Ġcripp led
ĠCal le
Ġfoot ing
ĠDumb arton
r agan
w ine
als ki
ĠSp ear
18 67
ĠGadd afi
ing don
ard om
ĠPal au
Ġflash backs
am eral
ĠJ ockey
ĠWil bur
ĠMont agu
ĠCamp os
ĠWork er
Ġem ulate
Ġtri angles
ÃŃ var
ĠAlex ei
Ġparishion ers
ĠCol by
c oll
nd i
Ġh osp
ĠL I
Ġel bows
Ar c
Ġexpect ancy
ĠKrist ian
Ġnot ch
Ġspeed way
Pr ivate
ĠAstron omy
Ġdow ry
ĠD ore
Ġen lightenment
ĠUN ICEF
Ġpros ecute
Ġcooper ated
ĠMin istries
Ġlim p
Ġtend ing
ĠCad ets
Ġlos ers
ĠBlanch ard
Ð° ÑĢ
ĠAt mosp
SA A
ĠBall room
acc io
His panic
Ġmatric ulated
he ment
ĠDet erm
ĠSet on
ĠMaxim us
Ġbas eline
ĠOrd inary
ĠB arg
Ar g
Ġshoot ers
e ach
ĠGaines ville
ĠC esar
ust ing
Ġapp arel
v ari
ter r
ĠKim ball
j es
o ing
ĠH r
ars k
18 72
ĠMor avia
Ġreciproc al
à ½
Ġ ich
ĠC uster
ĠMond ays
ĠPesh awar
s ight
ĠA achen
ah as
ĠFl anagan
Ġhorse power
ĠNak amura
M ario
ĠJ ovan
ĠWar hol
ĠLuc ian
Ġnov ice
ĠPentecost al
F ollow
N am
ch n
Ġincap ac
com ings
iy o
f ri
Ġro ar
In stit
Ġinteract s
Ġfet us
V ogue
ĠS ikk
ra ze
Ġsc av
ĠMotor ola
ĠD ogg
Ġna ive
Ġuns igned
ĠBuddh ists
ĠS ire
ĠR ye
ĠMac L
Ġacceler ator
ĠPick ering
á Ģ
Ġsh one
ĠSh un
ĠOp el
Scot land
ĠK wa
Ġjack ets
ĠMuÃ± oz
ĠL id
Ġmid day
ĠEntreprene urs
ĠT roll
ĠI c
Ġdisc al
18 74
Ġsubsid y
ĠFerr ara
Ġderel ict
t un
oc het
Ġbill ions
ĠBass ett
Ġrec ital
ĠCommun ism
ĠMont pellier
pol it
n othing
ĠAb i
Ġblue grass
ieut en
Ġtempt ed
ĠMahm oud
ay ashi
Ġjud o
Ġtext ures
ad den
Ġfreedom s
ĠGor b
ĠMom ents
kov Ã¡
gener ated
18 64
ĠAnt hem
Ġaccess ing
berg en
Ġgun ner
Ġexch anging
Ġassort ment
ĠN ang
Ġprim ates
d Ã©
Ġdisch arges
g iven
Âł 8
Ġfour s
ĠGall ipoli
Ġutil ization
unk y
ail a
geon ing
ĠP ipe
Ġwill ow
ĠNe uros
Ġsuper human
ĠSun rise
B rad
Y S
h idden
ĠA gh
se f
ĠY ves
M V
ĠRot ary
ĠCurt iss
Ġgenealog y
Ġdep ots
ĠSmall er
ĠFon taine
st while
Ġe books
od end
Ġsqu ared
ĠLy man
Sm ackDown
ĠSlav s
Y A
ĠM erv
ĠAt om
sh ops
Ġpar ach
Ġoverl ooks
ĠImag ine
Ġs ut
Ġcall er
Ġintimid ation
ĠH aid
P ress
ot ov
Ġhigh s
Ar gent
ĠD warf
Ġav al
Ġsenior ity
Ġreason ed
ĠConserv ancy
ĠBM G
H K
o aks
our cing
Ġment ored
ĠNag oya
ĠCalab ria
Ġs iph
ĠE ternal
ĠInstit uto
ĠR KO
Ġtransl ators
J a
ron a
Ġair space
Ġclass Name
ĠNaz areth
Ġinterfer ed
Ġculp rit
Ġcombat ants
Ġparaly zed
el an
rom o
Ġrun away
Ġ16 62
ĠLaw yers
Ã¨ me
Ġp ouch
Ġsm oked
ĠApp ropri
ĠLaz arus
administr ative
ĠSt rugg
ĠPur cell
Ġbout ique
Ġawaken ing
ĠConst abulary
ĠGele chiidae
: <
ĠP ank
Ġrem orse
fram ed
t otal
ĠT rit
ĠC rowd
Ġbr ushing
Ġlocal ization
Ġprot Ã©g
fit ting
Ġspaces hip
Ġfron ted
T rent
Ġspeed ing
Ġmill ing
Ġmanifest ations
Ġap ron
ĠGen ocide
ĠBenn et
ĠScar lett
f oil
ĠH ik
Ġvol t
ĠCivil ian
ĠInt ellectual
nik ov
Ġerr atic
ĠM ee
ĠSt ructure
Ġorth ogonal
ĠS hed
12 9
iol i
ĠBur undi
Ġdors um
oph ones
ĠIron ically
mod el
ĠWess ex
Ġm ule
st at
ĠG rafton
Ġbeh old
ĠTe j
ĠCool idge
Dig ital
Ġre written
Ġ6 40
Ġep ig
Th rough
Ġbul bs
ĠSha an
Tor onto
Ġactiv ates
Ġstem med
c arp
ĠC ourier
Ġz oning
ĠAnth ology
ĠRa oul
Ġrem embrance
Ġpo orest
abb rev
Ġcard inals
ĠKar ate
ĠTal ia
Ġtract ors
A th
P ed
pr incip
ĠMartin ique
Jac ob
Ġdefenc eman
ĠSolic itor
ut nant
og any
ĠViol a
Ġch ases
ĠNA IA
ĠMcG u
Wh ich
ĠRic c
dig y
Ġarth ritis
Ġdetach ments
ĠR N
ĠPl iny
ĠDes ire
en ium
ĠG ough
Ġlow lands
Ġinfer red
ĠSul awesi
Ġpard oned
j ian
oir s
ige ons
ĠCreat or
rochem ical
D yn
Ġw ording
Ġqu arant
Ġappropri ation
ĠB erman
Ġ21 7
ĠChar acters
ĠEmer ging
Ġimagin ative
Ġteh sil
ĠVojvod ina
ĠSt eph
Ġ16 10
tr ade
Ġhur ricanes
Cl assic
ĠDiam onds
Ġouts iders
commission ed
n ath
ĠB ao
Ġpl astics
Ġstruct urally
Ġste ered
ĠLP GA
ĠNell ie
Ġencycl opedia
L in
ĠC AP
ru ly
hn ess
Ġcor robor
AS S
à¤ ®
ĠNg Äģ
ut or
Ġrev amped
Ġsuit case
ĠForest s
ĠPle as
Ġbal ustr
Ġadolesc ence
il io
ĠC aine
Ġv ase
Ġloc ating
ĠAndalus ia
Ġear ns
Ġchuck le
ĠDap hne
Ġf encer
Ġup scale
ĠAr min
ĠCa it
rod ite
Ġchimney s
V o
Ġpl ent
red ible
Ġgre ens
Ġconver ge
ĠSebast iÃ¡n
ĠCont ribut
ĠHel ms
ĠMos he
Ġfasc ia
ĠJa ipur
ĠBot anic
F el
b ians
pl ates
ĠCon quer
Ġrail ing
Ġir rational
Ġexerc ising
ĠLast ly
ĠL ur
av ent
Ġpre clud
Ġ17 48
Ġturb o
k ent
p as
Ġhe mat
Âł -
Ġcens ored
ph onic
reg ulated
ĠInf inity
ĠProp osition
Ġblur red
ĠPoin te
l ac
ĠR ies
ak am
Ġun marked
Ġdes erts
az oo
ĠBow ls
ĠRef ere
ĠGuadal canal
ocy te
O ther
k han
Ġm um
Ġd umping
Ġper missible
ĠAd i
ĠSch re
Ġfrustr ating
C arn
H un
Ġdist ressed
ĠAm al
Ġfoot bridge
ĠHa upt
ĠUrb ana
ĠHe ading
ene uve
Ġreck less
Ġenvis aged
k amp
ĠC isco
Ġde hydr
00 00
Ġbl ames
Ġsm irk
Ġorg asm
Ġquar rel
ĠY ev
oz o
Ġalien ated
ĠGren ada
Ġteleg ram
N at
ard a
Ġcl ung
az u
Ġrabb is
pic ious
ĠWi ener
ĠL oves
Ġcamp ed
ĠLeon id
em ade
Ġun officially
Ġres olving
ĠUl tr
ĠBets y
ĠR afe
Ġ17 42
Ġwit ty
Sem itic
Ġdisgr ace
y cle
Ġind ices
Ġ17 01
D ata
join ed
Pe ace
B os
f ledged
ĠCor by
ĠF iesta
ĠE ster
Ġpr ank
Ġsum mits
G ames
c ounter
ĠE id
ire ment
arp ment
ĠNation wide
EN T
Ġtrim med
f ac
Ġstri fe
Ġen light
ÃŃ r
Ġinh aled
Ġoblig atory
s ons
Ġpeace keeping
- )
Ġc ot
ĠB rix
amp ur
Ġland fill
Äĥ n
ĠVog el
phe us
Mex ico
l ion
t as
ĠSar ac
ĠJed i
ĠCh rom
Ġadd itive
ret ch
ĠPl ut
Ġradi ating
Ġf ares
Ġne oclassical
ved a
Ġemerg encies
ĠS ell
ĠAng les
Ġfortress es
ĠHartle pool
c arriage
Ġover took
Ġfriendship s
ĠKend rick
ol ing
ĠP arl
ĠCar rick
ĠAcc ra
ĠSalam anca
Ġvandal ism
ĠChitt agong
ĠT weed
ĠCorinth ians
Ġdement ia
Ġin version
ĠF D
Ġav iator
J azz
Ġdiver gence
Ġdistribut es
Ġbench mark
ĠClem ens
el g
el imination
ĠLow ry
Ġtox in
Ġpar ity
Ġscient ifically
Ġfigur ative
Ġl oot
az an
He alth
ĠAut omatic
Ġcrust aceans
N atal
ac Ã¡n
Ġar isen
ĠKel vin
Ġpros pered
Ġmanip ulating
Ġunequ al
Ġdil apid
ith s
ĠD ung
ĠChop ra
Ġcos metics
h ind
ĠPr isc
ĠJose on
ĠKurd s
Ġs om
ĠSl aughter
z al
Ġ15 80
Ġsl abs
ĠParan Ã¡
ĠX er
Ġbow lers
omy ces
Ġbr av
ĠBer tha
ĠP iazza
ĠSt amp
Ġar teries
Ġright ful
Ġprim etime
Ġm ocked
ĠI ly
ĠB azaar
ut able
ort ostan
Ġpar odies
ĠAut omotive
ĠHem p
18 73
Ã¤ Ã¤
6 25
u et
ug uese
ĠFavor ite
G il
M aj
Ġhe gem
Ġhard wood
Ġseparat ist
2 25
ĠI SP
ak as
Ġall uvial
Ġport als
ĠC one
Ġtest osterone
N etwork
gr ading
ĠChen ey
ĠEmin em
ĠG ann
fer ring
ĠRad i
Re ady
Ġvibr ations
ĠMeteor ological
B ody
M ust
id or
ave z
ĠBl oss
13 4
beh ind
Ġvis as
ĠCl on
Ġem be
Ġrational e
ĠFut ures
ĠT iny
ĠD arts
ĠGe e
Ġsatisf ies
ĠPresent ly
ĠWillam ette
le ck
ĠHard in
Ġh ipped
ĠB ae
ore ts
ĠSw ab
ĠRoman ians
Ġang u
Ġmax imal
Ġimpr actical
ĠHack ett
Ġun st
Ġin ference
Ġbo oster
ĠÐ ²
Ġunt ouched
am ount
Ġbefriend s
Ġextravag ant
ĠB ong
ĠG ag
ab in
Ġpur ification
ĠScot ts
Ġnormal ized
ĠHun tsville
Ġembry onic
C yr
im atum
Ġact in
Ġdem olish
Ġ21 3
Ġsw apped
ĠOrte ga
Ġc unning
ĠE ich
ab ella
iss ar
ĠBu ena
lo op
ĠClaim s
ab etic
ĠSt orage
ĠSm ash
ĠMcG raw
S et
Ġ( â
Ġme nd
Ġ16 45
Ã©r ard
ĠGott fried
ĠK oen
arliam ents
ĠVinc enzo
ag ogues
hen ce
ando ah
Ġbir ch
Ġd iod
Ġ17 08
ex istent
of i
ĠSch ro
ĠBes ide
as her
aze era
ĠIz zy
Ġf iss
Ġsc ans
ĠRob ins
ĠSu i
Ġmotiv ations
ren cies
Ġisot opes
c Ã©e
Ġemer ald
ĠAfrika ans
ĠEus eb
g am
18 69
Ġrefer encing
ĠMe in
Ġsculpt ors
r t
ĠHe bei
Ġd ashed
Ġecoreg ion
ĠBashk ortostan
Ġsm ells
Ġsent imental
Ġre naissance
Ġinst igated
Ġrelief s
ĠMichel in
oub t
Ġinfilt rate
ĠS J
ab at
Ġup beat
ĠZ ia
Ġ17 49
Ġwrong doing
ĠF ier
Ġcomm ute
ĠAnd over
Ġunrest ricted
A y
Ã§ on
ĠLoc ation
ĠAst ro
Ġpatriot ism
ĠP aus
Ġconst ants
ĠAsh land
Ġacet ate
Ġgastro intestinal
Ġf anc
Ġp ont
ĠK irst
ah ara
O tt
s um
ĠArc adia
ĠAyr shire
ĠB ask
Ġv as
Ġnight time
Ġbol ted
Ġcontempl ated
ĠAd apted
Ġprincip als
ĠSab rina
Ġkins hip
ĠS NP
ĠI so
ĠGod win
ĠMcC onnell
Ġment oring
Ġundes irable
ĠPro b
ĠGh osh
Ġethn ically
Plan et
ĠG aius
art icles
Ġsp ouses
Ġgrow l
othe a
ĠC ister
Ġbe headed
Ġ17 22
ĠIs is
ĠPort age
ĠJack ets
Ġblind ness
Ġawa ited
Ġg uru
vers ive
ĠYe ovil
Ġcogn ition
Ġorth ography
Ġlar va
ĠD op
ĠU h
ĠAr amaic
ĠAgu il
Ġimped ance
it ates
ĠB amb
ĠWÅĤ adysÅĤaw
ĠC ena
Ġr arity
ĠSan ct
Ġraz or
Ã¼r gen
H ur
Ġsur geries
Ġ80 2
ĠBall arat
Ġconfron ting
Ġdef iciencies
Ġfore word
ĠAud itor
x it
Ġp iled
ĠMcC ann
Ġtur nt
A B
Ġas bestos
ass ies
Ġhes itate
ĠS aj
to e
ĠAl gebra
Ġpos it
Ġorder ly
Ġmass age
ĠCro ft
ĠLibert adores
H ong
ul an
Ġ17 13
Ġlod ges
id ity
ĠG anes
ĠMil ano
Ġcas inos
Ġvalid ated
Fl ash
Ġadm ire
ĠEval uation
nd en
ts man
Ġcorrect ions
Ġpeac etime
G overnor
ĠS oo
ĠB ET
ĠCon cep
ĠL acy
ard on
ĠK D
Ġ40 1
Ġspr ung
Ġtherap ies
M oney
ĠT og
em o
Âł yards
ĠIm mun
Ġcolloqu ial
ĠH uck
Ġcur ls
ĠMe ans
Ġdiv inity
ĠAle k
ĠOpp enheim
cur ve
ĠUndert aker
ĠK au
Ġens ign
Ġencl ave
Ġre neg
ot ions
ĠN ih
ĠO leg
ru ed
Ch annel
Ġmechan ically
ĠBern ad
I van
ĠN ost
Ġv ind
Ġdisc reet
Ġmust ard
ĠOw l
Ġphon etic
Play boy
ĠWeap on
Ġshort comings
Ġtravel er
Ġtatto os
og ic
Ġexp el
Ġign ores
Ex c
Ġmang rove
Ġo m
ĠS ow
omin tang
Ġtend on
Ġlig ands
Ġpix els
ĠT ener
ĠM ink
Sh ut
ĠS onn
Ġcapp ella
ĠW X
ew alk
ib outi
ars han
Ġread ership
usc ule
ÅĻ ÃŃ
ec onom
ĠP app
Ġdis respect
Ġdef ective
Ġb uddy
ĠBr andy
ĠWh ole
marg in
ĠOr mond
ony l
Ġter ribly
ĠHad rian
ĠArund el
B erg
Ġb iking
ek o
ĠPl uto
ĠWest inghouse
Ġenc amp
Ġwarm ed
Ġrecover s
quir er
ĠMau i
f owl
ĠS enna
ĠS gt
ĠBen z
ĠAqu inas
Ġpredict ing
Ġliter ate
ĠOg il
Ġorch ard
ĠBritann ia
V ision
ence phal
Th ink
ĠIvan ov
ĠH ail
oc ard
H ad
m age
ow sky
Ġanim ator
ĠMount aine
Ġadvantage ous
Ġvic eroy
ĠEqu atorial
ĠCoss acks
ĠF orth
ĠCD C
Ġretros pect
Ġpursu ant
s hed
Ġbl asted
Ġmen stru
Ġimport ing
Ġthor ax
ĠPeer age
b ak
ĠSch rÃ¶
ĠMad die
Ġb ouncing
ir u
Ġde form
Ġre use
Ġclim bers
ĠCall ing
ĠMend es
determ ination
ĠL add
Ġpe b
az o
ĠAnast asia
R oss
anc ore
Ġ17 34
Ġcatch y
Ġthank ful
e ared
in j
ĠHe ide
Ġint estinal
Ġaud ible
ĠYang tze
ĠGera is
Ġg ills
Ġund ist
Ġdel aying
ĠRem ote
Ġenthusiast ically
Ġ urn
ch ip
ĠAt oll
ĠCr imes
ĠRos enthal
eff ective
ĠChoct aw
Ġr ave
isc hes
ĠCorn ers
iat rics
Ġfresh ly
Ġmor als
trans mit
ĠS orry
enn ess
hop per
ĠDemp sey
Ġ" âĢľ
ĠG WR
gh i
ĠA ther
Äģ t
V inc
ut in
ĠSing ing
R ound
Ġth orn
ĠSp arrow
Ġest rogen
Ġord nance
Ġplat ted
Ġmor ally
ophil us
M obile
R ussia
m Ã¼
Ġs omeday
ĠW hel
ĠJ or
Ġbiot echnology
Ġantisem itism
ĠTiber ius
ĠD ept
olog ie
ĠZ i
Ġmar row
Ġp ector
aj ima
Ġseason ally
Ġovert aken
Ġvault s
ĠProcess ing
Ġg arr
ĠRe venge
ĠDel gado
priv acy
Ġdebut s
Ġbi omedical
ethn ic
J un
ĠI ain
gr ades
ĠFl av
Ġwa its
ĠNag pur
she nd
West phalia
ĠTob in
Ġc ephal
R M
d at
Ġst ony
ĠW G
Ġnum erals
ĠMil ky
ĠT ars
and re
box es
ĠPull man
Spe ed
A in
ĠThe m
ĠPl astic
ĠCont act
adel oupe
ĠB oots
ĠW reck
ĠTh in
ĠLyn ne
p itched
Ġe un
ĠB oud
18 62
Ġgly c
Ġplent iful
ĠM ose
ĠHart man
ĠFab er
Stat istics
ĠSt en
Ġinf inity
Ã¢ z
ĠDonnel ly
ge y
ĠV az
ĠPe oria
Ġsed uce
ĠPain ter
Ġskept icism
w erk
ĠAsh ford
Ġcement ed
N M
Ġdec isively
este em
Ġintermitt ently
D irty
i inae
Ġinf in
ĠHol stein
Ġstim ulating
Ġkne eling
C er
Ġj ugg
ari as
Ġcompl ied
ĠDim it
Ġbend s
ĠReyk jav
F ound
ĠB om
ĠRad ha
ĠLok i
ĠW orm
Ġblind ed
Ġreorgan ised
G uitar
M any
Ġch rome
ĠPot ts
Ġtack led
ĠSor bonne
Ġelectro des
Ġdevot ional
Ġawaken ed
ĠPow der
ĠProm ise
p oin
ĠP aine
isc iplinary
Ġf onts
Ġb ony
Ġab l
Ġgr ams
Ġ16 49
ĠRam irez
ĠSel ena
b ic
Ġm und
ep ers
ĠPl ays
agn et
P hys
ĠF OR
prising ly
P ic
quest ion
Ġshudd ered
der a
ĠSous a
W I
ine au
Le ave
W B
re ally
ĠMan o
ĠWil ton
ĠBell amy
foot ed
Ġsid ings
Ġtang ent
Ġfut uristic
Ġf ret
av ut
Ġunder p
Ġgrace ful
Hero es
b ars
l ava
ĠR ift
ĠRe gan
Ġcov eted
ĠAss emb
Ġmar ina
uts u
ĠHorn s
Ġorganis ers
D iam
ĠA eg
ĠMichel angelo
Ġdevast ation
Ġtang ible
Bro ok
Ġal to
ĠN eder
Ġmust er
Ġalleg ation
ĠEls ie
on ucle
oc ry
ĠK ond
unk hwa
mb uds
ĠGill ian
in stead
ĠAr den
Ġconc eding
ĠEss ential
ĠMuk her
B asket
ast richt
Ġsw ell
omb o
Ġve hement
ĠJournal ist
Ġnavig ator
Ġsteep ly
ĠPel op
ĠSurviv or
Z ulu
Ġon ions
ur in
pr ice
20 5
uz hou
ĠBr ice
ĠMon ts
Port uguese
er an
Ġstat istically
Ġdiss ident
ĠWalt z
st ag
ĠP esc
Ġim b
As ian
Ã¡l aga
st ations
ad v
ĠR ong
Ġmanual s
ĠC ause
ĠC atch
ĠBC S
ĠPen al
Ġ2 19
vent ures
col o
Ġá¸ ¨
Ġup he
ĠAl ter
Ġhit ch
ĠFore man
ĠAss umption
ĠCro we
ĠMem or
Ġa wait
âĢ ĳ
Ġle ans
ĠRock ford
ĠHerm es
ĠKaw asaki
Ġin quiries
ĠP V
Ġsh roud
ĠMiss ing
ĠHo os
L ok
Ġd art
Ġstir ring
Ġs wo
ad ir
Ġcomp ile
Ġund ec
Ġret ake
ĠT one
il ions
Ġper ched
och a
Ġf umbled
Ġund ivided
Mal ley
P H
yl ation
Ġemp ires
umin ous
Ġloyal ist
Ġreper tory
ĠI a
Ġdist raught
ĠFI NA
Ä± z
Ġaw oke
Ã´ n
ĠFerr er
Ġfut ile
C and
ĠLov ecraft
d ata
ĠSim ultane
war ves
ĠCS KA
Ġhyperb olic
es ley
Ġnot ification
ĠCom cast
Ġdemon ic
ĠDu o
Ġh ilar
ĠV oting
uch in
Ġappro ving
ĠKrem lin
em aking
ĠK ru
erm ott
f onte
o amer
Ġb rit
ĠM outh
Ġcant ilever
ous el
Ġconf eder
Ġmultip lic
Ġhither to
l ai
ĠB ender
ĠPro k
Ġfore casts
ĠBuk it
r ach
le h
Ġpre text
Ġbr ist
ĠOff ices
ĠPak ht
Ġfasc ism
Y ellow
ĠS ly
ĠP arm
ĠR OM
ĠGr um
Ġide ologies
oph ora
Ġbar bec
ĠGovernment s
ĠRaj u
inde er
ĠCor ona
Ġsmugg led
id ase
Ġfl are
Ġtox ins
establ ishment
plat form
ĠYeoman ry
M ars
ĠJ ank
oth am
Ġsol v
Ġgro ve
J ess
ĠGal ilee
ĠBell ator
ĠFal mouth
l aughter
ĠMan x
Ġexpl oding
Ġrecon stituted
ĠDid n
Ġoff shoot
ĠNY U
ĠAct ivity
la unched
Ã¤ ng
ĠFraz ier
ococc us
ue va
urs ed
ĠStep s
f ts
ĠW anted
ich a
ĠHigh ness
ĠF ix
ĠInd ira
Ġson ic
ĠEx chequer
G overnment
v Ã¡
Ġsp acing
ĠSal im
ĠG anga
ĠJ S
ap al
ĠK wan
ess ential
Ġsc utt
Ġ15 90
ĠMor itz
Ġcourts hip
ĠMcM illan
Ġmartyr s
ĠAr b
Ġ16 03
ĠTr ab
Ġprop ellant
Ġbomb arded
ĠEnd angered
dr iver
Ġchim pan
Ġfingert ips
ĠAl ast
ech a
ĠElect or
Ġcart s
ĠTrust ee
ĠPrin ting
mus eum
Ġfamiliar ity
ĠRost ov
ĠBurb ank
m ah
Ġb ellow
st retched
ĠMcInt osh
ĠV f
ĠDar cy
ĠBe v
Ġrelax ing
Ġer stwhile
ar ctic
ĠP ric
ĠSat y
Ġencounter ing
ver bs
ĠCo ates
Ġdecor ate
Ġfost ered
ĠN oy
Ġyoung sters
Ġcheck point
ĠOp in
Ġnas cent
cad illy
is ka
ĠM BE
ĠCh alk
Ġ23 1
f ries
ion es
ĠG Ã©
ĠAut ob
ĠCab in
ĠC rick
ard t
ĠLe ighton
Ġint racellular
ĠIth aca
ann an
Ġexp ire
Ġ17 14
16 5
ĠNich olls
Ġsav age
ĠInvestig ations
Ġsculpt ural
inth rop
Ġsed uct
J osh
Ġsp p
ivers e
P le
Ġbre thren
Ä± l
Ġrob bers
Ġhyp ers
Ġartific ially
ĠE hr
Ġy awn
ĠCl ash
ĠAustral asian
Ġenc aps
Ġmer idian
f ox
ĠT ully
ig matic
Ġsh aky
Ġsp ying
irc he
ĠMart ina
Ġmillion aire
ĠEst adio
ĠSet tle
Ġl ured
ĠPhil osophical
Ġheres y
ĠW im
ĠG I
Ġsoft ened
Ġaer on
ĠUs er
q vist
bur ton
Ġlog ar
lock ing
Ġentr ants
ĠCul ver
Ġpunish ments
Ġben ign
Ġprotector ate
ĠM Y
Ġbro ch
Th ird
Ġoptim ism
Ġsalv aged
ĠPatriarch ate
ĠWaik ato
C ool
Ġw avy
Ġr aging
w olf
ĠE pp
oin ette
Ð¾Ð »
ĠGovern ance
ĠJ D
Âł I
ĠAn son
Ġst abbing
ub bed
15 5
ĠBus an
ĠMagd eburg
d ell
Ġc c
lin t
St range
Ġimm ature
Ġlev ied
ĠRous seau
ĠQuant um
ĠFeld man
Ġo c
ess en
Ġsp ins
Ġanaly sed
oscop ic
e ux
Har per
ĠC is
Ġsub channel
Ġcru ises
ĠCB D
ĠUS DA
ĠGreen field
ĠSem if
ĠEis en
ĠAccount ability
T u
Ġf ared
with in
ĠIber ia
Ġwas p
ĠW arl
ĠSt arring
Ġdef icits
Ġbi ennial
Ġamount ing
j ur
ĠV Ã¡
lin ton
add in
Ã¨ se
ĠDef ender
Ġembe zz
Ġrefer ral
Ġslog ans
Ġan te
Ġsp elt
Ġwid est
Ġper il
Ġforce fully
Ġeccentric ity
t ong
ĠCap com
Ġstock ed
ĠCh ag
Ġent renched
rap ers
ansh ah
s it
Ġe ct
Ġsuff rag
het amine
Ġclust ered
Ġmelanch oly
Ġemb assies
Ġconqu ests
ĠSon oma
ĠH arn
13 3
Ġfr antically
Ġdens ities
Ġrust ic
ase k
Ġ15 70
ĠSouth wark
bl og
ĠReg al
Ġmelod rama
Ġlords hip
ord a
B ishop
H art
ny i
Ġpan icked
ick y
Ġmain stay
Ġreb irth
ĠInter face
Ġmedi ocre
Nob ody
H oney
ĠT ann
ĠOn o
ienn es
ĠJoh ansson
ĠBox er
ĠPil ots
: -
ĠL ina
Ġpun ching
Ġinterrog ated
ĠTerror ism
Ġd ing
ĠD ao
ĠW anda
augh ton
Ġche es
Ġlog os
ĠKu omintang
M arsh
Ġd ra
ĠR iy
ĠFors yth
T our
ĠB ane
Ġdeleg ated
ĠBe i
ĠAb orig
ĠMos ul
ĠAz ad
Ac acia
Ġweld ed
Ġres ented
iel s
Ġson ar
atter y
ĠArgent inian
ĠWey mouth
Titan ic
em inent
urs ive
ĠGl aston
ĠDak ar
Ġspell ings
f lying
Ġd arted
Ġbut ler
ru v
ĠOr lÃ©ans
Ġrest less
Ġtrav eller
Ġblend s
Ġzool ogist
il ov
Ġst anza
Ġdis dain
als y
och astic
Ġsympt om
ĠCoch in
ri ber
Ġgr ind
Ġemb argo
ĠÎ ¿
ĠExper t
Ġk an
ept ic
Ġoct ave
ĠJill ian
K P
c ov
ĠO sc
oc amp
Ġafter life
ij o
IC S
ĠFont ana
R F
un ya
av on
Ġ17 39
Ġlevel ed
ĠConsid ering
C up
T ang
Ġsl ipper
ĠWhite hall
ĠT oad
amb urg
in ism
re as
ĠRe aching
Ġair ship
ĠFe i
Ġdepr ivation
he k
ov ar
til a
ĠKh rush
ĠHad ley
ĠHaz ard
ĠBaut ista
ĠMay field
Ġpost modern
Ġprol ogue
ĠGust avo
ĠK uro
Ġded icate
ĠGraph ics
Ġwas ting
ĠL ili
if ice
Ġbuild up
ĠBy pass
TA R
Ġhabit ation
alde hyde
Ġminiat ures
E t
G ram
W ee
Z ero
ĠD isco
art i
ie h
Ġj unta
Ã© ph
ĠRes urrection
ĠMad urai
Ġemigr ants
ĠCaliph ate
Ġpanor amic
O A
hes da
Ġwin ery
Ġz u
pher ds
ĠWr ong
ĠBl och
Ġtri ples
Ġo mit
ak os
ĠExp os
ĠLyn x
ĠStew ard
iv able
ĠSo ho
ĠKar an
Ġdri pping
ĠTeh sil
ĠHaar lem
Ġer ased
ĠDi agn
ĠReal m
ĠS arm
Ġg aug
ĠE ger
ĠComp osers
Ġnort her
cient ious
N y
ĠD ost
Ġconf id
oph obic
Ġag itated
Ġspecial ises
Ġexpress ly
á½ ¸
B omb
Ġt iers
Ġcant ata
ĠQuest ions
T D
Î ®
ĠCh om
Ġessay ist
ĠWonder ful
ibald i
ĠPerm ian
h ap
Ġharm ed
l ob
ĠAsc ension
ĠBonif ace
ud an
Ġpers ever
ĠSu Ã¡rez
Ġcircum stance
ĠQual ifier
ĠL M
ĠFr ans
ĠTour ist
S um
ĠT ribute
Ġj oking
Ġembroid ered
k aya
Ġher m
ĠV alk
ĠAr na
Ġreg aining
Ġshell ing
ĠBatt ista
ĠOce ans
33 3
Ġblog ger
Sal em
ĠLic ensed
Ġdisreg ard
2 60
Ġv ents
ĠK V
Ġneed y
ĠSte en
ĠÎ »
ĠAS EAN
Ġproof s
Ġinhib its
Ġmedall ist
M un
ĠSecond ly
raf al
Hen ri
rieg s
- (
E mer
a ise
Ġtr icked
hol t
ĠUkrain ians
Ġmicrop rocess
her ing
av ic
ni ak
Ġrecur rent
Mond ay
Âł rpm
pl ied
though t
ĠTown shend
ĠFin lay
Ġfault y
dist ricts
Ġto ad
oc ke
ĠCl ancy
ĠLim estone
dem and
Vict or
illi ard
Ġanonym ously
Ġdownt urn
ĠP im
Ġle aking
ĠMo ira
Ġap se
ĠDalmat ia
e is
Ġf idd
Ġl ang
ĠF unny
ĠCo o
Ġrock ing
Ġz oom
part ement
ĠBert ram
Ġh ubs
ĠL our
ĠV ÃŃ
ĠOak ley
æ Ń
Ġprov oke
Ġemp athy
IN T
d oc
ĠP ines
ĠK ao
Pr ime
ĠBulgar ians
Ġbrace let
Ġcrus ade
ĠAs ians
Ġprot racted
ĠIm per
Ġto dd
ĠW Y
oc co
Ġj ihad
Ġ22 4
Ġextermin ation
P age
r zy
t imes
Ġw anna
que ous
Ġdisp ose
ĠS ections
ĠB ick
Ġle aks
ĠÐ ¡
Ġdomest icated
ĠL ens
ore a
Ġim itate
Ġfl aming
ĠZ anz
Ġen am
Ġbl asp
Ġ17 44
ĠInter change
ĠMa her
Ġtang led
sh ift
ĠBay ou
Ġclut ched
Ġdisconn ected
ĠSh all
ĠEn h
ĠQu ir
ĠSl igo
Ġmand al
Ġstun ts
Ġhex agonal
Ġconc ave
Ġpict orial
ĠR ish
Ġout breaks
ĠPart izan
ĠBres cia
ĠI J
Ġst acks
Ġar able
Ġstar ters
Ġrow span
Ġtent acles
ĠG iving
Ġow ls
Ġp anned
ĠStad t
C ould
Ġe el
Ġnear ing
ĠDor sey
hand le
ĠAl ameda
ordin ate
ĠCa en
ĠL N
ra im
Ġ17 02
Ġhard ness
Ġdiscipl ined
ĠSev illa
F if
ĠBjÃ¶r k
om is
Ġtong ues
ĠSymp osium
ĠG it
ĠShe e
ĠMont es
oces an
Ã ģ
Ġint rus
E ight
v s
Ġc ocked
ge bras
ost ok
Ġcell ist
Ġwheel base
ĠDise ases
ĠS ven
ĠC PR
Ġr idd
Ġfront age
Ġindustrial ization
Ġblo oms
ĠSkop je
Ġappl ause
ĠTrav ancore
rand t
ĠNou veau
K y
or ama
j it
ĠOlymp us
ĠMa ori
ĠWÃ¼r zburg
Ġes oteric
Ġinform ant
Ġbur geoning
ĠJud as
Ġdeploy ing
Ġnickn ames
Ġcust od
ĠDock yard
ing es
ĠAnd ri
Ã´ tel
Ġsafegu ard
Ġplund ered
E ye
Ġf id
ĠE ocene
ĠEx odus
ĠWil fred
Ġornament ation
ĠA res
Ġj eep
Ġexp iration
23 5
Ġcaptain cy
rac ur
Ġnephew s
Ġch icks
ĠAd al
Ġbox ed
h air
Ġro ared
Ġdo om
ren ees
Ġ16 25
ĠJim Ã©nez
ĠBou cher
Ġantib iotic
Ġmonop lane
Ġrecons ider
Ġsn apping
ĠFar oe
ier ry
Ġprog en
Ġfast ing
Se ason
Ġinfl ated
sur face
ĠW adi
Ġun iting
Ġad ept
Ġpart ing
Ġcol i
A ye
Ġwestern most
id io
Ġfl aps
ĠCar ole
ĠHay ley
ĠN ast
Ġtrans atlantic
ĠSch m
Ġthr ash
IS C
Sp ider
Ġsymbol izes
Ġfemin ists
er og
ĠFl ags
Ġ22 8
Ġcod ified
Ġcomfort ing
f y
ĠH itt
Ġspec k
ĠM ung
Ġbar bed
ĠLok omot
ĠP iot
ĠSus anna
Ġtruth s
Ġconsequ ent
Ġfost ering
p kins
pl anned
ĠFl air
Ġsymbol ize
r ade
en act
ĠK ev
Ġschool teacher
des pite
Ġstalk ed
C re
Ġr agged
Ġind uces
ĠLeg a
Ġcoinc iding
Ġsav anna
Ġcataly zes
ĠMold ovan
ĠThuring ia
w ad
Ġy achts
ĠKe ene
ĠBan u
ĠGran ite
ĠCheng du
Ġadvers ary
Ġdiction aries
ĠD angerous
ĠL eland
ĠCarm arthen
Ġexplo iting
Ġmatt ress
Ġsub jug
oz y
Ġextrem es
again st
ĠP roud
ĠGu ineas
Ġfring es
ĠGlaston bury
n us
Ġent ourage
Ġprob es
Ġbul ld
Every one
ĠMang alore
K R
r ists
Ġ( ~
ĠF inger
art an
ĠEd itors
Ġcast es
Ġfrag rance
z no
ĠC aul
Ġstart ling
ĠAm arant
Ġgal van
ĠMaurit ania
Eng land
ĠEure ka
A ge
ag y
Ġled ge
Ã³ l
Ġut tered
ĠHuman itarian
Ġdur ability
Ġc innamon
ĠH erv
ĠAg ents
ĠÃ į
ĠHann over
Ġproc ured
ĠPadd ington
t om
ĠC og
Ġsight ings
health y
Ġembroid ery
Ġstr ive
Ġworld ly
18 40
ĠKilm arnock
ĠPal in
Ġimmers ion
Ġdisillusion ed
Ġcent rif
Ġ15 60
à¸ ²
Ġinsult ing
ĠRust y
Ġk ios
ild ed
ĠLe es
Ġfinanc ier
Ġrefuel ing
L N
let es
ĠSty ria
Her ald
ĠD ri
Ġ17 25
ĠRh ino
ĠĠĠĠ ĠĠĠ
ĠManif esto
ĠP ai
ĠG ree
Ġlook out
Ġspecial ize
Ġcolonial ism
ĠI NS
ĠP amp
ĠSt roud
Ġthere in
Ġfr antic
ĠLy ric
ĠZach ary
å ¹
Ġsh aved
hist orical
ĠSikk im
ach ie
ĠEn n
Ġwind shield
l iss
ĠH B
Ġj ok
Ġref und
ĠElizabeth an
Ġmand olin
ĠBiaÅĤ ystok
Ġcleans ing
Ġe ul
ĠWal pole
ĠDal ey
Ġank les
G G
Ġst ares
Ġinc umb
Ġbr aced
ĠJos hi
ĠSu icide
ĠGas par
Ġicon ography
Ġstrap s
ial a
ĠJim i
Ġj ub
ĠAs p
Ġant agonists
Ġlex ical
j pg
ĠBro die
Ġprofess ed
Ġpract ise
ĠCam el
ĠB ost
Ġsh immer
18 66
oglob in
ĠB arrier
ĠRep ubl
Ġcor oner
Ġfore wing
ĠMid town
Ġsight ing
ĠAt tend
Ġdon ating
ĠÃ ¢
ĠGen ie
ĠSquad rons
ĠWend ell
ĠI PC
pect ing
bl ank
Ġscal ar
ĠP uy
Ġem ph
ĠEc ology
ĠChand igarh
Ġoptim ized
Ġlumin osity
Ġlar val
ĠT oys
ĠL B
ĠIn grid
ĠSh y
ĠArch duke
ĠAy y
Ġduck ed
ĠY ur
ĠChe ung
arp ur
Ġwarm ly
ĠSew ard
Ġtect onic
T RA
ĠK inc
Ġbr isk
ĠApp leton
Ġanten nae
ĠThr ace
ve e
ĠWh ale
Ġmar oon
Ġwild cards
ĠAh l
Comm on
terr anean
Ġinter war
ĠPen rith
ĠRodrig ues
Ġtransist or
ĠKhrush chev
D al
v ald
ĠAccount s
ĠSieg fried
f Ã¼hrer
Ġf angs
Ġe ti
all iga
Ġinterchange able
j Åį
it ution
ĠP unta
all ax
J oy
ĠC SA
ĠC argo
Ġcop ing
Ġdeploy ments
ĠWy combe
Ġd itches
ang ays
ĠStat ement
ĠJT WC
h av
Ġprofessional ism
ĠLeop ard
D aw
ĠBrit ten
Ġnon fiction
Ġarsen ic
Ġf jord
pr inted
Ġmis dem
ĠLo an
Ġclean up
ĠMill ard
ĠSab a
ĠTol st
ĠKoh l
ou z
ĠM Ã¡r
ĠF Y
Ġvault ed
Ġineff icient
oy an
Ġelect ive
Âłl bs
ĠIncre asing
L ad
com er
be au
Ġtow ing
ĠHold er
Ġhandic apped
F at
R est
V erb
ĠIn stitutional
Ġj an
per forming
Ġhouse keeper
W E
v olt
ĠSh ams
la q
Ã¤ d
b ags
ca ution
def inition
pop ular
ĠLey land
ou e
Ġtrans pl
Ġex quisite
ĠUn limited
Ġimperial ism
ĠCry pt
ĠAleks andr
l ung
in tern
ĠCol es
Ġ17 17
Ġspl ash
Ġcrocod ile
ĠG oul
Ġan omaly
ĠJ erm
our ced
ĠY ank
ten ay
oot en
Ġdeep ened
Ġdispers ion
Ġoverhe ard
Ġvener ated
z man
ĠG onna
Ġun cles
Ġdef amation
Ang elo
g ings
Some one
Jon athan
Ġobliv ious
ĠJut land
us can
ĠF Ã¼r
Ġwh isk
Ġsize able
ĠRock hampton
Ġattend ants
ĠÐ ľ
ĠReview ing
ĠMars den
ju ven
Ġnic ely
ĠSch uster
Ġmill ennia
ĠPOW s
Ġdilapid ated
Ġthe r
aff y
ĠX ander
ĠLim burg
Ġexempl ary
ĠD iffer
ĠBe ale
Ġstop page
Ġrav aged
ĠSale h
ic ke
Ã± as
zew ski
M ut
ir re
Ġbo ar
Ġgrand stand
Int o
ĠC GI
ĠVill iers
Ġsubscript ions
C ape
Ġun ison
Ġbl ushed
ĠResident ial
Ġh acking
ish an
ĠLGBT Q
ĠPsal m
Ġhe n
ĠW inthrop
ĠBl izzard
ala is
Ġrod ent
Ġrefres hing
ĠC itro
Ġco er
ask ar
ĠAir play
ĠHor atio
Ġirregular ly
Ġr ipe
Ġleg ions
ĠLud low
Ġchrist ened
o er
Ġar chers
Ġ17 35
Ġthr illing
ĠPic ard
ĠNut rition
ĠCes are
G h
L yn
Ġ17 43
ĠMark us
rev olutionary
c rew
ap art
ĠZ appa
ĠCl over
Ġsign ify
Ġneglig ible
Ġperpetr ator
Ġextingu ished
Ġcoron ary
Ġinter changes
Ġpar ochial
ĠJud o
d escribed
ĠM unn
Ġoff line
Ġmy riad
ne a
Ġ30 5
ĠSm ile
Ġwerew olves
Ġmassac red
Ġh ottest
iac os
K rist
ĠCol Ã³n
Ġhuman oid
Count y
Ġbask ets
ery l
Ġ( *
ux ley
m ode
ĠSig mund
ĠY ek
ran ath
ĠCS I
ĠSh aft
aj ar
sh u
Ġenl arg
D J
en idae
Ġunder graduates
Ġind ifferent
Ġ16 21
ĠCont rovers
Ġhapp ier
Ġdisadvant ages
ĠM TA
ĠM AR
ĠB ech
Ġec hel
ĠSony a
ĠMidd letown
ĠAnch or
ar ca
ĠS ato
Ġby tes
og unate
ĠBrit ton
Ġglobal ization
ĠShawn ee
ĠHer tz
ĠEx ample
ĠJes Ãºs
ĠMarg are
ĠGut i
Ġdisband ing
ĠCandid ate
ĠProfession als
ĠS X
Ġassign ing
M ans
ĠP ew
Ġdem eanor
Ġfac ades
Ġconduct ivity
Ġmathematic ians
Ġl inger
Ġhe ck
ĠMar atha
ĠMin er
ĠBut ch
Ġspecific ity
Ne igh
ĠSzcz ecin
ert ory
ett in
Ġst urdy
ĠF BS
les que
ĠWe instein
ĠBon ne
creat or
S elf
ill era
se h
Ġ4 30
Ġobserv ance
esty les
16 7
Ġrecomm ending
ĠC az
ĠHe ard
ĠY ous
Ġcoc oa
ĠWid ow
ĠPolynes ia
Ġfles hy
ĠCuth bert
Y a
ĠP hen
ĠL ust
Ġk er
ĠV ogue
Ġqu oting
Ġed ict
ĠBever ley
Ġuncont roll
Ġc ork
Ġh ose
ĠV ag
18 63
oyal ty
ĠJe hov
ĠGrand ma
Ġpun itive
Ġformal ized
ĠB ier
um u
Ġbl ink
Ġconstit uting
ĠCS X
With out
t ings
w ali
ĠA im
ĠJ alan
Ġtyp ing
Ġmail ing
ĠGunn ar
Ġnic hes
] "
im id
ĠMod ena
Ġempt ied
ĠShan xi
Ġauthent ication
ĠInclud ing
ethe us
Ġb umps
ĠN k
Ag ain
News week
ĠM Ã¡laga
Ġsh aded
ĠTim ur
Ġpel vic
ĠTeut onic
Ġbats men
Ġepile psy
r na
el ow
Ġplan ar
ĠJal isco
ĠChong qing
ĠB uss
ĠDr ink
Ġadj utant
Ġsan itary
Ġbrow s
mbuds man
oc les
ared o
Ġorgan ises
Mar vel
Ġbureaucr atic
respons ible
ĠF os
Ġste amboat
Ġw inced
ĠC ere
ĠC AA
Ġcl oning
ĠAn ac
ĠBrit ney
Ġmass if
racur ricular
r ul
ad hy
ĠMon archy
Ġcl ich
way ne
row ed
err at
ĠMad eline
ĠSqu ire
Tr ust
ĠPic cadilly
ĠK ala
ĠÃī mile
Ġth irt
ĠP fe
ĠL overs
S ad
ĠD uma
ĠK iy
Ġex asper
ĠV arma
18 30
Ġste aming
ĠCoch ran
ĠVoy age
z ano
Ġe g
Ġrec oil
ĠLe ung
Ġmol ten
p oly
che e
Ġpup pets
Ġchrom atic
P ter
Ġsp arks
for ces
So ft
Ġprofound ly
Ġal d
Ġsign atories
ĠGe h
ĠSant ander
Ġmatter ed
n os
Ġy uan
Ġsl ug
Ġpers istence
ĠAld erman
ĠLetter man
ĠM anga
av at
ip ar
ros a
ĠArt es
Å¡ ek
Sec retary
or ov
ot ropic
ab ha
ĠJo anne
ĠBr uck
aff en
ĠBy d
Ġrad ars
Ġton al
ĠMall ory
Ġpestic ides
Ġ ..."
Ġw iring
ain ty
Ġretreat s
Ġcultiv ar
ĠNguy en
ĠComp oser
Ġche ated
Ġstri kers
ĠHel mut
ĠDiv ide
Ã§a ise
Ġqual itative
ĠBet hesda
Ġpron oun
ĠE at
ra u
Ġaff licted
Ġbo oming
ĠPalmer ston
at ak
ear ns
Ġty re
ĠAb stract
ĠMa astricht
Ġforget ting
ĠAm en
Pol it
Ġd ag
ug an
ĠZ ep
ĠOr son
Ġanim ations
Ġsens ible
rid ers
Ġexcer pt
g ut
u Ã±a
ig ree
Ġrel iably
Le vel
Ġquadrup le
d rug
Ġl ys
ĠF is
ct on
Ġ20 30
ĠMart yn
Ġfertil izer
Ġscrew ed
Ġgarr isons
ir ted
Ġgun men
Ġelement al
Ġapprehend ed
Ġhench men
p rotein
ĠU mm
ĠBel inda
Ġban anas
Ġcler ics
Ġeff ected
ĠPand ora
Ġquot ation
ĠPelop onn
B oys
e vent
Ġ15 30
ÄŁ an
ĠU st
Ġ25 5
ĠSab ine
Ġdop amine
D ad
en ance
ĠR ent
ĠWeb site
Ġalter cation
bek nown
ĠHers hey
ul c
Ġbit tern
ĠHond uran
ĠJehov ah
ĠS ochi
Ġext ortion
Lew is
ĠInf lu
ĠEnter ing
Ġhistori ography
R R
Ġr ations
ĠGu ides
go ers
Ġdefend s
ĠMach ines
Ġportfol ios
Ġlengthen ed
ĠAl le
ĠJust ices
ĠSynd rome
o ed
ĠGentle man
Ġfantas ies
F ield
Ġ16 09
Ġdisc ounted
Ġsem antics
C u
ĠS ellers
Ġal um
its ky
Ġphot ons
Ġill ustrious
ĠVer izon
Ġfellowship s
Direct or
in an
ĠV ito
Ġ17 18
uck oo
ĠLaure ate
Ġmild ly
Ġcons olation
Ġcre eping
In c
ĠMenn onite
ĠYucat Ã¡n
Ġall ergic
r ations
ĠD ara
ĠW ow
Ä °
ĠD ang
ak um
ĠGy psy
Ġadmir er
ĠKhark iv
W at
p ict
ĠJ ann
Ġatt ribution
ĠT int
ĠE red
Ġab ut
Ġident ifier
ĠCarn iola
Ġg ale
Ġinstall ments
Ġtom atoes
ĠEC W
Ġunder age
ĠAnd ean
Ġrul ings
Ġrevers ible
Ġdigest ive
ĠB ho
ab akh
ĠU NA
ĠFre i
osph ate
ĠGu ar
ĠEll sworth
ĠAeron autics
Ġpes os
em us
ĠL aj
Ġsp indle
oss al
ÅĤ o
h ounds
Ġw ored
ab elle
CA M
ĠMid western
Ġsect arian
F ederal
ios a
educ ation
it ance
Âł V
ĠDec ision
ĠDav ison
qual ified
Ġairst rip
ĠGif ford
18 56
unct ure
Ġpant om
Ġgr unted
Ġinvol untary
Ġden oting
ĠBor ussia
ĠPon te
Ġcraw ling
at tended
Ġ16 66
Ġsymp osium
ĠDob son
fund ing
ĠSuperv isors
m arsh
ĠHamp den
G ene
Ġb ison
am ish
Ġ16 72
ĠEx port
Ġcalls ign
Ġ17 37
Ġsupp ressing
Ġfresh men
ĠAbkhaz ia
ĠGuel ph
ĠM ane
ip al
ord en
ĠâĢľ âĢ¦
Ġlect uring
Ġovers ized
Ġinsign ificant
s uccess
ĠRe ims
ĠIntern acional
Ġecho ing
Ġaltarp iece
az ione
ĠIs la
ĠAllah abad
Ġscarc ity
ec ca
ĠP iz
18 59
14 4
Ġdomin ion
Ã©r rez
Ġth irst
ĠCom fort
Ã® n
King dom
ĠC aves
Ġnight clubs
ĠBon o
ĠPy renees
Ġextrad ition
b end
ĠK ach
Ġdec ider
ĠCon vers
20 1
val u
omm un
Ġgun nery
ĠMcCle llan
Ġ16 83
ĠTor pedo
Ġpurs ues
Sup erman
Ġw ired
Ġ16 79
me ida
Ġmult im
ĠSand erson
ĠKind ergarten
14 1
Ġanaly tics
ĠPC s
ĠTag ore
ĠEss en
ĠCed ric
b ats
ĠT ED
ĠV idal
ĠGr upo
Ġopp ressive
Ġsil very
ĠChest nut
Ġp iety
ĠE riks
Ġfac ets
ĠSch ae
ĠPal me
c ivil
z d
Ġcap tion
Ġlit re
Ġempt ies
ĠSail or
ĠWynd ham
al ah
av ir
per iod
Ġint ently
Ġclin ch
er le
as w
ĠGor man
ĠBhut to
ĠM ika
ĠFork s
ĠKoch i
ĠPomp ey
soc cer
Ġg imm
ul idae
Ġcons ervatory
ĠCy press
ĠAk k
ĠKang aroo
Ġres up
Ġmerg es
ĠEarn hardt
Ġquadr atic
S oph
ĠMal ibu
lo om
CC C
à¤ µ
B rig
Y e
Ġs ects
ĠDe M
con tained
ĠKu hn
Ã¥ s
Ġcatast rophe
d ock
os cope
Ġindepend ents
ĠEduc ated
ĠSuper liga
ĠAk ira
Ġble ak
ĠDeb ate
ĠLiter acy
ĠMeh med
Ġdiscrimin atory
Ġexempt ed
Ġ Ñķ
round ed
inc ible
ĠRed mond
ĠPack ard
O F
ce phal
pl atz
13 2
ĠVen eto
Ġgather s
ĠRab in
ĠEur asia
R ud
å ¾
et ooth
Ġshe ath
Ġcircum ference
Ġneut rons
ĠViol in
ĠMarcel o
Ġtempt ation
Ġharps ichord
Ġso othing
ĠSh ao
ĠBlo oms
gos zcz
D evil
Ġbl asts
Ġseek ers
ĠOb viously
Ġkit chens
ĠAlders hot
q q
ĠEn erg
Ġvalid ation
P ra
ĠD urga
Ġconf ines
ĠPred ators
ĠArgon auts
Ġembro iled
found ers
ĠKrist ina
S ant
or u
Ġl akh
med ium
ĠCabr era
ĠG athering
ĠDes p
ophys ics
Ġsilhou ette
at om
ĠP DF
ĠIn ge
Ġne ared
Ġbre ech
ĠAud it
ĠMother s
Ġwarr ants
p athy
on ics
ĠT af
ĠG illingham
epr int
ĠAguil era
Ġst rapped
iev able
Ġnip ples
Serb ian
C hen
ri as
Ġde ferred
Âł Âµ
15 2
Ġreb oot
Ġprof iled
ĠBro om
Ġexam iner
ĠDev onian
ĠZomb ie
I ce
n ice
ĠImp ression
ĠB ering
ĠJ ansen
ric ulum
ĠLe uven
medi ated
ĠTop eka
Ġrav ine
E ug
ĠL op
ĠMan u
Ġpopul ist
ĠSurv ival
ĠF acing
ĠE E
ĠTr acey
ĠMon to
Ġpurp osely
Den is
ĠBakers field
R oute
Ġenc ode
Ã¢ b
L iga
ĠP AS
ĠMar ietta
Âł (
Ġref ining
Ġfold er
I ris
ĠT omm
ied er
Ġcent ennial
ĠAst oria
ak han
Ġ16 54
Ġult imatum
Great est
j illo
ĠH utt
av ad
Ġmy el
oped ic
ĠRiz al
H mm
N as
z ee
ek i
ĠSocial ism
ĠKamp ala
ĠOll ie
Ġnorther ly
b isc
t all
t ale
ĠE ul
ĠBr aga
Ġ16 29
ĠArm ando
Mar x
Commun ist
ar ah
ĠR ie
Ġat rium
ĠMc Don
ĠJim mie
ĠFer enc
Ġwheel ed
F lying
Ġacquaint ances
ĠOj ib
ĠBAS IC
b ours
l ana
ĠL oad
Ġ16 35
ole an
Ġcircum vent
ĠCornwall is
ĠM N
Ġsh ocks
Ġ16 38
yn y
Ġwood p
Ġcontest ing
Ġordin ances
Bund es
ac otta
ĠEl v
ĠHam lin
ĠMa as
ĠBrah ma
ĠErick son
ol le
ĠF aces
ass isted
rit orial
Ġwe eds
ram atic
ĠZ hi
Ġpoll uted
Ã® m
inal do
ĠSch o
ĠProt ected
Ġdangerous ly
Ġchronic ler
ĠR aces
Ġac he
ĠPart ridge
Con c
Sm art
Mic ro
Ġaffirm ative
ĠHe br
ĠTr ace
ot an
ĠAll s
ĠSup pose
Ġtend ers
rics son
ĠLock wood
Ġsunk en
ĠVeter an
P erson
Õ ¡
at ant
ag ra
Ġk ite
ĠL ett
hel a
Ġtyp ew
Ġparam ount
Ġtoll s
Ġw aged
Ġvill as
18 55
ĠMukher jee
Ġany time
ĠPr z
Ġpain fully
ĠBak r
m ast
r idden
Ġtr ainees
Ġ4 10
Ġcat ers
Ġnem at
Ġfam ilial
Ġgeneral ization
27 5
Ġrevers ing
ĠBrah ms
Ġeste em
ĠKany e
Ġtranse pt
Ġbypass ing
V id
ĠPort able
aver ns
Ġmans laughter
ĠSpit fire
ĠBy e
Ġexc ursions
ĠWal mart
pur i
Ġequival ents
Ġdy es
ĠS oren
ĠV ener
Ġsubstit utes
ĠGott lieb
Ġcollier y
Ġgeck o
c arry
Ġbr ink
ures h
Ġgro an
ĠBux ton
ĠN ig
app ings
ĠAur ang
Ġa queous
ough lin
end ium
Ġsuc king
Ġrecogn ises
Ġfulfill ment
ĠKod ak
E sp
ĠC oco
ant ine
ĠIs lington
Ġ16 59
ĠPort al
Ġet ched
ĠCerem ony
eb ted
18 5
Ġdet ain
Pr incip
Ġassemb ling
Ġsub conscious
Ġsmart phones
Ġpatriarch al
Ġsecl uded
Ġsuff ragan
Ġrib bons
E ucalyptus
F ig
Ġacc use
S or
Ġoffic iated
ĠObs erv
Ġling ered
an ja
Ġ17 33
Ġswe ater
r ino
ĠSh at
Ġdepart ures
ĠTrom s
ĠMargar ita
V ideo
Ġant ics
Ġstring ent
Ġcrack down
Ġl ique
ĠG erv
els k
Ġinfilt ration
Ġwh isky
ĠJ ock
oc ross
Ġrec ess
Ġme gal
ĠCl im
Ġrev ue
ĠMeh ta
ĠHokkaid o
Ġdown graded
ĠSy d
Ġblock buster
girl friend
V ice
ĠT rying
ĠAl askan
ĠAs a
18 58
13 1
bell um
ĠM av
ĠCal i
ĠPle asure
Ġthorough fare
Ġinspect ors
Ġgarn ering
Ġkn ob
Ġgl iding
14 3
ĠRub ber
ĠFuller ton
w aves
ĠRes orts
Ġacceler ating
ĠBaloch istan
d ot
p to
ĠMarc ia
ĠHonor able
Ġsimul ator
b iz
ĠPer d
ĠSal inas
Fore ver
Ġnud ity
Ġh ortic
Ġe Bay
omin ational
ĠMor o
Ġir red
Ġrival ries
ĠDesign er
ĠHath away
g Ã¥rd
Ġg our
ĠJ ax
Ġy en
ĠMor al
Al right
ĠExp ansion
ĠLore ntz
Ġsubordin ated
ĠK ari
ĠFr Ã©dÃ©
ĠYour self
Ġpip elines
Ġcompress or
ĠGuti Ã©rrez
T est
Ġster ile
ĠPist ons
Ġsp ears
ĠParn ell
Ġh ars
ĠS vens
Ġex iles
à¸ £
ĠCorinth ian
americ ana
v irt
ĠNot ts
Ġspect ator
ĠBra xton
g raph
el isk
ĠB ien
Ġ3 75
ĠRep ertory
ĠAdd is
Ã¸ ya
Ġmerc antile
owo omba
recogn ized
Ġreaff irmed
é ģ
gr an
ĠEm ile
Ġconver ter
ĠJacob son
Ġment ors
Ġpremier es
Ġmarginal ized
ĠTick et
re au
Ġe ther
ĠAustral asia
ĠLand au
ĠMey ers
Ġre imb
ĠF uku
Ã³ ria
Ġter ra
Ġfil ament
Ġdiet s
ĠBoul ogne
ĠChihu ahua
Ġd azz
Ġsp ice
ĠGates head
ĠCarth ag
reat ing
Ġpolit ely
ĠBat ista
Pho en
ts burgh
ey n
ol ated
18 48
ĠGall eries
ĠAdv iser
Chair man
abbrev iated
is land
ĠT is
th ard
ĠCh ou
ĠPl acement
ĠBir k
ĠMar che
Ġcount down
com merce
ĠAntÃ³n io
Ġad mon
Ġ4 70
in aw
ĠAng olan
akh and
ĠBed e
ĠHend rick
chron ous
Ġmultid isciplinary
ĠCrock ett
w s
Ġc u
Ġleg ality
Ġ26 5
ĠNe ust
Virgin ia
D ivision
st or
ne utral
ĠPar c
Ġwalk ers
Ġrac ers
ĠBurg os
ĠTah iti
ĠMedic aid
ĠIntro duced
Ġasymmet ric
Pak istan
tain er
ĠMag h
Ġeastern most
onne ur
h id
ot ron
Ġsp aring
ĠGuz mÃ¡n
ĠP elle
um ably
Ġregion ally
at ars
Ġ( -
ĠG omes
oy l
Ġset backs
Ġintro ductions
ĠGren oble
ĠPill ai
dou ard
pl ot
ĠFok ker
p od
Ġex odus
ĠGal en
Ġconqu ering
ĠProtestant ism
ĠP est
ĠR ov
ign ing
Ġgre edy
ĠDund as
Dun geons
ĠExerc ise
Ġover board
met a
Ġtank ers
ĠWorth ington
Mid night
T ele
ĠA AC
ĠF Ã¡il
Âł 24
reg ional
Ġder og
aro os
Ġlingu ists
ĠAltern ate
Ġtap ered
ĠThr one
Ġrefriger ator
Ġproclaim ing
Ġwh irl
ĠN TS
M iami
f orts
Ġre write
ĠG hetto
ĠMel inda
Å¡ e
å Ľ
Ġd arling
Ġchlor ine
Ġblu ish
ĠT ia
ĠI MF
ĠSh oes
ms ford
ĠVe er
b ish
ĠH aji
Ġdep rec
Ġep hemer
Ġz ip
ĠSon ata
appro ved
Ġv ivo
Ġcomp liant
ĠAm mon
Ġsw earing
ĠCart wright
Ġfox es
ĠH ello
Ġr aven
ens itive
30 3
ĠVill anova
Ġskirm ishes
M it
ĠHe isman
St orm
Ġenc irc
ĠN iles
Ġinf initely
Ġ22 3
ĠVine yard
Ġstam ens
str and
Ġnet ball
Ġpy g
Ġtheor ized
Ġk ib
Ġfin er
ĠJe z
Ġpersu ades
j uk
t arg
ĠC rou
ĠCal um
Ġfac el
ĠLand on
bre athing
ĠTw ice
Scott ish
add ing
Ġvo icing
Ġsung lasses
Ã©dÃ© ration
Ġultras ound
k tra
Ġt ann
ug ia
ĠCor bin
à¤ ¯
C F
e at
ĠD red
ĠProtector ate
Ġshell ed
ĠEver green
ĠBras ile
ĠB anco
ri arch
ĠAc cept
ĠBer th
ĠPur itan
ĠTakah ashi
ch u
ch apter
Ġdel inqu
Ġsecret ion
Ġbaronet cy
Ġmicrob ial
Ġup s
az ila
Ġfire power
ĠLoth ian
Ġsandwic hes
U t
ic ott
ĠB uz
Ġ16 65
Ġmag ma
Ġbit ten
ĠAcadem ia
Ġrevol utions
ĠAl ou
ĠOr an
Ġachie ves
L ucky
R yan
c reen
ĠN en
ĠZ eke
sc ribed
ĠSchum ann
ĠC ura
Ġbat on
Ġclear er
ĠShaan xi
8 75
b ok
ĠTr iv
Ġdest abil
ĠB iod
ĠF ung
Ġopp ressed
Ġrenov ate
ĠFresh man
Ġinv itations
ĠMand ir
Ġpretend s
Ġparan oid
an ter
ĠS AP
Ġr upt
spe akers
ĠRub en
ĠLinn aeus
Ġgaz etted
Ġseason ed
Ġbroad ened
Ġobsc urity
ĠAttempt s
N ar
Ġ3 15
Ġsc orers
ĠZ ig
Ġrig ging
Ġcaud al
ac char
th orn
ĠJu illiard
ĠMex icans
m ort
m eth
ĠAth lete
Ġcontain ment
ĠEld ers
ĠGrad ually
Ġinspir ational
Ġret ribution
ĠMan ipur
Ġfew est
ĠMust angs
ĠAN Z
ĠOpportun ity
k ut
ol phe
aw arra
Ġpr ere
Ġfores h
M AC
Ġt igers
ĠR ats
Ġcar pets
ĠMes oamer
ÂłM W
ĠNun avut
es ford
ot r
ĠR itz
owl oon
ĠC ourses
ad ine
os omes
out ing
ĠBe ers
eck i
ĠIr ina
ĠVis itor
ĠMother well
ĠS addle
Ġsc ur
Ġcr imin
ĠOlymp iacos
ĠFC S
Ġfiber glass
Ġrup ture
ĠRecogn ition
ĠMatte o
h os
ly de
Ġbi ochemistry
Ġpear ls
o ja
Ġle vy
ĠAn ya
w inter
arg ate
Ġdyn astic
y ed
ĠR ew
os ive
ĠMor ay
Ġfall out
ĠLam ont
Ġric her
Ġtab oo
ĠKeen an
B ow
C V
ĠE ind
ane e
ĠMal abar
Ġaud itor
oz yg
Ġast rophys
Ġupd ating
harm ed
W in
ĠL X
ĠJ amb
Ġcircum c
ĠOber lin
acet yl
Dist rict
B ull
b els
m il
w orms
ĠL oved
Ġsil ky
ĠMem ories
Ġrom antically
F inn
ĠCh avez
ĠAr bore
ik ar
Is a
Ġfolk lor
Ġfigur ines
j ima
ĠCh av
gen y
Ġsulf ide
ĠGan esh
ĠBÃ© la
Hou ston
x on
ĠV oss
Ġ17 23
by tery
att acks
ĠRobert a
Ġeas iest
ĠMos ley
ĠShen andoah
W are
ĠH agan
13 6
Ðµ r
ad olid
ĠL ian
ĠNik ita
Ġrobot ics
Ġcasc ade
Ġspecial ties
ĠDem and
Ġsn ooker
Ġforward ed
Ġarc s
ĠComple ted
ĠLuck ily
ak al
Ġbl aze
ĠGame Spot
D OT
ĠS QL
oy ama
Ġint uition
Ġcr adle
Ġinsult ed
Ġmosa ics
Ġmans ions
Ġapopt osis
ĠL ipp
ĠM est
Ġsh un
Ġ17 24
ĠAv g
rafal gar
h ors
Ġrel oad
Ġgl aring
Ġneur on
ĠExtra ordinary
all er
Ġhand writing
Ġimpart ial
ĠChish olm
um sy
ob os
ĠMy stic
ĠFrank enstein
ĠConc ur
Ġstair way
ĠCert ification
G rup
ĠIn gl
ĠSe Ã±
Ġtun ic
Ġappla uded
ĠF iles
ĠMe gh
ĠHuman ity
ĠHir am
ĠLoren z
Ġgriev ances
Ġcon du
Ġsk ipper
Ġbol ster
f actor
ĠPal i
cat cher
D ays
Ġp ans
ĠT aur
ĠB ike
ĠAdd ress
ĠG ator
Ġde hydrogen
Ġmult if
Ġopt imum
ĠDipl omatic
Ġn ond
leg io
Ġz eb
Ġbrief ing
B ed
P itchfork
Ġbe ech
ĠG yeong
ear ance
Ġ30 2
Ġlegisl atures
ĠGros venor
Ġwre ath
H ind
w ash
Ġsl ack
ĠDay time
Ġwr inkled
ĠEnt rance
Ġchop ped
ĠRosal ind
Ġdiarr hea
ĠL uka
ĠK ais
Ġ5 20
sp ect
Ġmult ic
ĠHels ing
Ġrec essed
Ġ17 19
ĠHall s
Ġsolo ists
ĠÎ Ķ
Ġumb il
R s
S id
Ġb ik
Ġinter collegiate
Ġmon ot
off ensive
Republic an
ĠTener ife
Ġ16 64
Ġtum ult
j ie
ĠC res
K ings
ĠB icycle
arm ac
ĠMah atma
Ġ à¦
ĠT aken
cl oth
Ġrepl icated
Ġstep pe
Somet imes
s id
Ġt aut
ĠAM D
ĠAdj utant
Ġrel ayed
ĠZ eta
ĠSurvey or
ĠR asm
th ly
Ġk han
ĠCon or
ĠCam ber
ĠTrans l
ĠUnivers it
Ġadvent urous
ĠBen oit
la wn
Ã¨ ve
j os
ĠOl av
Å¡ t
Ġexpatri ate
O t
CO N
ĠGir ard
ĠLuk as
Ll oyd
Ġth rottle
any an
Ġ16 92
of en
Ġhuman ist
ĠSax ons
ĠMold avia
Ġpurported ly
r ata
ĠT ark
ĠW om
ĠN U
Ġr ash
Ġsix ties
Ġpred icts
ĠGust ave
Ġadhes ion
ieuten ants
Ġf ibr
ĠC IT
ĠN el
ĠQu er
ĠSevent y
Ġantisem itic
ĠW ic
Ġdel im
Ġsuggest ive
Ġhyd rol
Port rait
ĠTru jillo
T rou
k k
Ġ16 52
ĠArm or
ĠOp Ã©ra
ĠNas ir
Ġh inder
ĠCh ron
Ġinter stellar
ev sky
bl att
Ġwild card
Ġampl ified
ĠAl man
ĠPro ctor
Ġ24 5
ĠPer ak
ĠOs bourne
Ġneur onal
Ġre cl
ig ens
Ġwid en
Ġstere otype
Ġrelent less
A sk
k ma
adem ic
Ġpast ors
Ġtravers es
Ġcoh ort
S ever
k umar
eg reg
elect ions
Ġbe wild
ĠF T
Ġ5 12
ĠFor get
ĠSw anson
Ġsyn agogues
Ġtele port
Ġtag ged
Out standing
Ġth ugs
ĠCon ner
af en
ĠPe le
Ġhom ework
ĠGar ibaldi
ĠRa Ãºl
Ġprofit ability
ĠNug ent
ĠC ress
ĠD ham
att u
Ġexport ing
on ius
Ġb unkers
ĠI G
Ġassault ing
Ġconspir ators
Ġseaw ater
ĠPax ton
it ano
ĠA q
ad venture
ĠAnd orra
Ġeyes ight
ĠPal ae
ĠRub ens
Col lege
Ġabst racted
r ack
w ort
ĠN PC
man ent
Âł 11
ĠBl anca
Ġsw arm
ĠTem pest
ĠPeg asus
Ġf idelity
ĠJ ura
se ver
Ġ16 24
ĠKh ar
ĠEr z
ĠSch loss
Ġens ues
met ric
Ġadvert ise
Even ing
ĠAmph ib
Ġreinforc ing
Ġbru ised
ĠCoss ack
ĠG oo
Ġhaul ing
ĠByd goszcz
ĠD ons
ĠPe aks
ĠEsper anto
Ġm afia
un ov
ĠSe af
arr ay
Ġbar ons
Ġpoll utants
Ġpancreat ic
al co
ĠAl low
Ġ16 28
Ġstr ide
Ġbas ics
ĠTam ara
ĠD iversity
ag ena
ĠUn a
Ġcar p
Ġut most
ĠFund s
uzz i
b ane
ĠG org
ĠCh as
ĠBl om
Ġ22 7
Ġhom emade
ĠRo of
Ġnarr ates
ĠBaronet age
Ġstabil ization
Ġsp ong
Ġco educational
gr up
15 4
ĠGro ÃŁ
ĠFij ian
m d
Ġg lee
Ġ16 34
ĠArt ificial
NA S
Ġrebell ions
Ġquot as
Ġal ve
ĠFound ry
Ar men
Ġcup ola
C ole
iv isie
Ġus hered
Ġoper atives
Ġes ter
ĠRow ley
Rob in
Ġb ang
fer m
ĠAng er
lic he
Ġobtain s
ĠPerson ality
Ber lin
m ust
it aine
ĠF reet
ĠMo oney
13 7
uz er
ĠBrad bury
Ġaston ishing
Ġneuros cience
Ġengulf ed
Ġf oes
Ġ16 22
ĠSing leton
Ġplann er
Ġunion ist
Ġcart el
Ġincident al
Ġpreview s
ĠQuit o
Ġg ilded
ĠP ru
ĠSt u
Ġev oke
Ġ17 04
Ġproject iles
ĠBar angay
Ġcenter piece
Ġphilosoph ies
O ct
ĠS ip
Ġn our
em akers
Ġreg rets
Ġbott led
Ġtoss ing
A G
f ated
Ġd ick
ĠK eb
ĠTo owoomba
ĠBad ge
ĠLamb eth
j ing
Ã© ry
Ġ16 75
ĠGr ays
18 54
abb at
Ġchem ically
Ġchef s
ĠMacK enzie
P ros
Ġc ords
ĠB elling
ĠRod erick
ĠAR M
Ġenshr ined
ĠTe ach
ĠGwyn edd
Ġinter d
ĠZ ieg
Ġmis use
ĠChal mers
Ġ(Â £
ĠAmade us
ac ulture
ĠPA L
Ġprev ail
ab ra
Ġdef iant
ĠTr ident
Ġcondition ed
ĠJÃ³ zef
ĠB urch
ĠL iao
Âł 29
ĠAnt onia
Ġpur ge
Ġmis chie
ĠKrist in
ĠTimber lake
3 40
ĠH ester
Sh ould
Ġspect ra
Ġsubt itles
Ġinval uable
ĠComm od
ĠAugust o
18 2
ĠLew es
group s
Ġman ic
mart ial
Ġthunder storms
Ġa ber
ĠA br
ĠTh ou
Ġ17 28
Ġrequ isition
ĠEight y
Ġclutch ing
ĠAnj ou
ĠC U
ĠTs uk
angan ese
ĠS akh
ĠG err
ĠO NE
ĠMc All
ĠVas co
are ne
ĠEff ective
ask ie
ĠThur ston
ĠSh uk
lu or
ĠAg ra
T ek
ch amber
Ġreal ising
mir a
Ġfurn aces
ĠK la
Ġtr ig
Ġmid ship
ĠTow ard
Ġforfe ited
he et
Ġp yr
ĠP SA
and ran
ĠHe gel
ĠMer rick
Ġcyt ok
Ġarous al
Ġh ue
ard ic
amb oy
ĠVill ar
T ouch
ĠT ach
Ġ30 3
Ġge ese
Ġsens ations
ĠSaf ari
ĠFalk irk
ounsell or
id ered
ĠO ECD
Ġeval uations
L ex
ver gne
ĠD utt
ĠTur f
ĠJust inian
iqu et
Ġant ec
Ġcant ons
) /
ĠW iki
ĠK ool
ĠCA D
Ã¶n en
Ġp und
Ġarch diocese
Ġdispar ity
ĠVolta ire
c aus
ĠCent enary
Ġspraw ling
Ġre ared
ĠM imi
Ġmore over
bl ers
Ġir is
Ġperpet rated
M oh
j el
ip at
Ġcomp rehension
Ġmill imeters
Ġpup py
ĠIC F
ĠRode o
ĠD ish
ill ie
Ġvers atility
roy d
ĠDown ey
Ben jamin
ĠSpir its
ĠT ent
ĠR emb
act ively
Ġmed iate
Ġwar head
Ar k
ĠCC TV
ĠJ agger
ĠMen zies
ĠBomb ardier
ĠNest or
Ġw ig
ĠV uk
ĠAl amo
Ã© c
ĠAm iens
Ġ23 4
ĠSel by
ĠPolit buro
ĠPremi ere
ĠFayette ville
ĠHabit at
um ines
Ġup keep
Ġuseful ness
ĠKrist en
Ġrev iving
J ourney
ĠP asht
ĠZ y
Ġadj ourn
Ġcard i
Ġreass uring
Ġcler ks
D ave
ĠM aim
Ġind ifference
Ġcare g
Ġapp ar
Ġ16 04
Ġtre ad
Ġsoci ological
á¸ ©
ĠBridg ewater
D om
is able
it ories
ĠS og
ĠB ors
ĠP H
ĠF aire
Ġcall igraphy
Ġwrap s
ĠD rift
ĠV S
ĠDef enders
ĠÐ Ĵ
Ġverb ally
ĠVaux hall
in tegr
ĠAugust inian
Ġfair ness
ĠDyn amic
ĠCrus ader
Ġb ully
Ġind ign
Ġ22 6
ĠCov ington
Ġcompat riot
Ġoutc rops
ĠBingham ton
J HL
ĠN aked
Ġun harmed
Ġcre v
Th ough
iny in
Ġcro oked
áº§ n
Ġres orted
Ġ17 32
18 57
Ġlaw makers
Qu ercus
ï »
Ġsc orn
Ġsimpl ify
ĠVett el
r ave
Ġp ore
ĠT ijuana
ĠN ymph
ell en
Ġext racurricular
ĠGu ine
ĠTom Ã¡s
ĠFe et
Ġfat hered
Meg a
Ġremed ies
Ġhousem ates
ĠHue y
u que
ĠT ew
ĠP SP
ey a
ĠHer ring
ĠTor u
Ġincarn ations
ĠNir vana
e ley
p ointed
Ġc ors
ĠA OL
Ġrel ational
ĠOp ole
Ġhomosexual s
conf idence
Ġencrypt ed
g ade
ou c
ĠT ire
ĠN is
ĠY pres
Ġfl ocks
Ġed ifice
instrument alist
P as
ĠD ole
ull i
ĠLa unc
Âłm iles
ĠDet ails
Ġbury ing
j aw
le c
ren amed
ĠSp ice
ĠIm plement
Ġvacc ination
ĠVari ations
F un
Ġob liter
18 52
Ġbrother hood
Ġlandsc aped
B ud
al aya
Ġloc us
tain s
ĠEl be
val ued
ĠCart el
Ġrespons ive
Ġcarri ageway
Ġpropag ated
ĠD ari
St one
Ġsupplement al
inf lamm
Bet ween
Ġmetaphys ical
ing ling
ĠB Sc
ĠB unker
ĠR aul
ome y
ĠY ol
ink ling
ĠLaw ton
ĠRa ion
Ġd ummy
Ġpl umbing
ĠFem inist
Ġchrom at
Ġhav oc
Ġgl o
Ġsw irling
Æ° Æ¡
ich te
sk inned
Ġbank ers
ĠNev is
ĠYad av
iss en
ĠPe i
add ock
bing en
ĠFO X
n ake
ĠH att
Ġty ped
Ġpunish able
ĠMacLe od
ĠCels ius
i ations
ĠGu adeloupe
Ġ23 2
ĠKit ts
Ġentrepreneur ial
M ach
Ġ9 50
ste ine
ĠFel icity
ĠSep ar
ĠCrist o
al c
ĠG ama
ĠN ek
ĠN CO
Ġhand y
ĠMore ton
Ġdri er
ĠDiamond backs
k ova
ur m
off ed
ĠOrgan ized
aria h
ĠDor ado
ĠLin z
ĠLandmark s
Ġmirac ulous
Ġb obs
Ġbl ush
ĠSa ipan
ĠMcG overn
ĠCant or
Ġunres olved
Ġ17 16
ĠDev onshire
Ġbarn s
ĠRene e
as el
ĠL ol
Ġsubgroup s
Ġzool ogy
Ġsc or
duct ase
ĠEst ud
n ost
ad z
ph obic
ĠSc ripps
ili ers
Ġlink age
ĠPo ison
Ol iver
if ics
Ġrad iated
Ã¨ le
ĠAthlet es
ĠDor othea
feld t
ĠYemen i
ĠDial ogue
ĠBapt ists
in formation
oc ia
ov olta
ĠZ aw
Ġint uitive
pro claimed
ĠM p
ĠSh ows
ĠLiber ties
ĠCock er
Ġout buildings
ĠMar ques
ĠDe va
Ġsuffix es
ĠThe ta
ĠFI DE
Ġax les
ant age
ĠKar am
ĠPhys iology
Bro ken
L incoln
S ide
o of
ad hi
Ġret itled
rict ly
Ã¡ Å¡
Ġsuper star
Ġstalk ing
lech ase
Ġtweet ed
ĠN Ãº
Ġ16 11
d ates
æ Ľ
Ġf uzzy
ĠO de
ĠAl meida
ĠCar p
ĠOl sz
ĠLes otho
IV E
Pl us
Ġcoinc ides
Ġprecurs ors
ĠCosm os
Ġdispar ate
Ġincompet ent
Ġd ereg
arn i
ĠMin ute
ĠMist ress
m ars
Ġb ant
ĠâĢľ "
Ġpast ry
Ġdimin ishing
Ġp ests
av ans
abs or
Ġalphabet ically
ĠThir uvan
h itter
Ġf en
Ġmeas urable
anth apuram
Å« n
Ġmicro organisms
Ġmeteor ological
ĠH ec
Ġcons cientious
Ġroad ways
Ġsqu id
Ġretract able
Ġalkal ine
b usters
s aving
ĠÐ ¼
Ġnan op
Ġcush ion
Ġhepat itis
ĠL azar
Ġsl ash
Ġbar ber
ĠInf inite
ĠKier an
ĠMetall ica
ĠWhist ler
I an
ĠP itchfork
ess er
ĠGen etics
ĠNap oli
ĠPry or
ĠL ucha
Ġret in
ĠCo e
Ġdel le
Ġreform ers
ĠI p
ĠB onds
Phil ipp
ĠT ric
ĠP inn
Ġac ry
Ġ3 22
A ld
Ġp lywood
ĠP ico
ĠO ke
-- -
ĠLaunc eston
i Ã¨res
ĠK ail
Ġ17 11
Ġeff ig
Ġexperiment ally
Ġnavig ational
ĠRe is
Ġcur iously
Ġint estine
Ġlic ences
set ting
fort une
ĠVall adolid
Ġsuperhero es
Ġoy ster
ĠC ib
Ġr iffs
ighth ood
ĠRem y
ĠMob il
Ġb umped
ĠS es
if i
ĠMan uscript
Ġselect ively
Ġtonn age
ĠHew lett
Sem itism
B es
Ĥ ¬
ed ic
ĠH edge
j j
ĠN au
Ġsocial ists
Ġbar angays
Ġfal con
Ð¸ ÑĤ
Ġstereoty pical
Ġab ide
Ġ17 03
Ġchar ms
Ġsecret ive
ĠMand el
Fr ances
ĠUn gar
Ġwork load
ĠMar lon
ĠSe en
C ube
Ġphosphory lation
Ġadject ives
c ett
ĠG anges
Ġover weight
Ġpre cept
ĠMac beth
Ġvisual ization
ĠSteven age
Ġmund ane
K ath
or ado
ĠJ onny
ĠK ano
ik in
ĠDan ville
26 4
à¤ ķ
Met ro
ĠMub arak
æ °
Ġsh uffled
Ġparent ing
ed u
en st
Ġto kens
ok an
ĠCl ippers
ĠDr iving
Ġopt ing
Ġiron ically
Ġpercussion ist
Ġgr ist
ĠOr well
Ġrum oured
Ġreward ing
Ġrode o
s lavery
on zo
rom pt
ush in
S han
ic ola
cl ose
pl ish
Ġforg iven
Ġairst ri
ĠPsychiat ry
B G
H arm
Ġaren as
ĠBres lau
Fin ancial
ĠHerod otus
j ourn
Ġm ute
ĠE il
13 8
ĠNi all
Ġpav ilions
on ie
ans w
ĠSc ro
ĠPal a
ĠGood bye
ĠCall ahan
ĠAlvar ado
Ġcomp ounded
Ġcad re
ĠRens sel
ĠDarm stadt
er ina
Ġwhen ce
Ġunder carriage
Ġsign ifying
Ġ16 95
Ġjud oka
ĠGen etic
Ġmo an
Æ°Æ¡ ng
K ap
hy n
ĠChair person
Ġast rology
Ġtranscript s
Ġintermedi ary
ĠColer idge
ĠEuro Basket
Ġcongress man
ĠGard a
ĠPurs uit
m oney
Ġc uc
ĠHar le
Ġoccup ancy
Ġwhisper ing
ĠSimultane ously
ĠP rel
ĠN ieu
ĠJ unk
ĠAnd res
Ġgl iders
nut rition
ĠPand it
ĠNils son
ic ana
st raight
ĠG urd
Ġob verse
ĠCar pent
ĠSw ords
Ġvenom ous
C N
Â ³
Ġhor rific
Ġoutc ry
C art
re ux
ud en
erm al
ĠIll ustr
wick et
E k
J enn
Ġsh alt
ĠMar coni
ĠCom pt
az es
ring e
ĠBu ick
ĠLuc ille
Ġrig ged
ĠRiv iera
g ames
Ġm ott
ĠH aines
Ġst ochastic
ĠF uck
ond i
aut ions
Ġsuff used
ĠDu ane
pat ches
ĠOp rah
ĠC et
Ġcr um
ĠWe alth
Ġsecret aries
ĠTurk u
ĠFlorent ine
Ġhypert ension
K I
Ġass ures
ĠMay an
Ġdep letion
ĠBl ades
ĠSe at
Ġel usive
ĠGeorg ina
Ġdimin ish
ĠRespons ibility
ĠBarbar ossa
ĠThe l
Ġcl asped
ĠShel ly
ĠPlat te
r uc
z ier
ĠM akh
Ġg er
Ġkn uckles
in osa
ro ok
ĠS isk
ĠV ist
Ġrec itals
Ġprov ost
Ġsink s
ĠHunting don
Ġt ors
Ġpotential s
alog y
ĠFriend ly
ĠR iggs
ul ant
ĠK U
ry m
Good bye
Ġ3 90
ĠGr ateful
ugg ets
ĠStr av
Ġissu ance
ay u
Ġmon strous
ĠMe er
Ġgun ners
ĠCat o
Ġcream y
Any thing
ĠEred ivisie
C ycl
g ens
ĠA ix
ĠD us
enc ers
arn ia
ĠIS IS
Ġbru ises
ĠTuf ts
ĠE ricsson
Ġsp onge
ĠSam aj
ĠMonitor ing
Ġsincer ity
Ġf utsal
Ġ16 46
aff in
ĠWald o
ahas see
s ound
ber a
Ġ17 09
cl oud
spec ifically
ĠP ieces
Ġ17 05
Ġaltern ated
Ġsteam ship
ĠValent ino
ĠTall ahassee
ĠMarlow e
C ob
ĠA TV
Ġ17 36
Ind ones
Ġsaus age
ĠZanz ibar
P omer
ĠL avin
Ġan a
Ġdiss u
ĠTw entieth
ĠFar ley
Ġframework s
ĠStrat ton
ĠCitizens hip
Ġmollusc s
ĠC ai
Ġwith held
Ġcl inging
Ġme zz
em ite
ud ers
Ġinternational s
Ġconf use
Ġstar ch
ĠMess age
Ã» l
s ufficient
Ġ Ùħ
ĠR D
ĠU RL
Ġbenefic iaries
n ier
v ocal
ission ed
Ð¸ Ð¹
Ġmyster iously
ĠN ader
ame y
Ġev asion
ĠCol leen
ĠAb use
ĠVill eneuve
ĠGib b
ĠZimbabwe an
Ġredist ricting
Ġdis ass
Ġmov able
ĠMat hes
Ġsevent ies
Ġimag ining
Ġsw ims
ĠSm ooth
Ġch ir
Ġ17 38
ĠQ C
ĠDj ibouti
Ġdwell ers
ĠCouncill ors
W G
p Ã©
ĠG ing
ĠKÃ¶nigs berg
C ass
ĠAd air
ari i
Ġmess engers
sec urity
Ġfrie ze
b rick
w ai
re pl
ĠL yr
fer t
Ġ16 56
DA P
Ġemigr ate
Ġethn ographic
ĠH appiness
ĠCol lin
ĠGe ology
ĠVill ages
ĠMorris sey
ĠAbbas id
C ow
Ġartic ulation
rel ief
esc ue
bad en
Ġaristocr at
ĠSau v
ĠTempl ar
Ġex commun
Ġ26 2
Ġcat ech
ĠAld en
ĠWu han
ĠPav l
ĠK owloon
Ġmen acing
ĠBern ice
ĠF oy
Ġan aer
ĠCh uk
Ġup land
Ġenh ancements
ĠSi amese
Ġtroop ers
Ġtrom bone
Ġst ump
Ġsm ashing
ĠZ ain
Ġturb ulence
Ġcaf es
---- ----
ĠEuch arist
O bs
in vest
Ġup lift
orph ic
Ġseam en
ĠCinemat ography
A rd
st alk
Ġnational e
ti en
ĠBow ers
Ġdeleg ations
Ġaffection ately
Act ually
A ur
p rec
w es
Ġl est
18 53
Ġexpl odes
ĠDav ao
ĠMethod s
Ġconscious ly
Go ing
B ird
am ani
Ġfores ee
Ġcyn ical
B le
ge al
Ġhost ess
Ġpick et
Ġded uction
Ġintegr ates
Ġoption ed
ĠPC I
Ġbull s
ĠRenf rew
os ch
ĠMy Space
ĠNe z
ĠS IM
sc ore
ĠPar allel
ocr ine
Ġz oned
Ġtow ering
ador a
ĠBelie ving
uss ing
ĠDor ic
ĠAld o
N u
ĠPart icularly
ks andr
ĠAT M
ĠHend rik
ad is
ĠP PP
ĠY eshiva
Ġrep el
Ġpul s
Ġbott len
h le
ĠD Ã¡
ĠBr ill
ĠSed g
ĠRasm ussen
F em
em ore
Ġirre vers
E asy
Ġstr angled
ĠMel ch
ĠChild hood
ĠCarr ington
Ġsemic irc
aksh mi
G ary
am ir
are lli
Ġfore ground
Ġ24 2
ĠSch iller
Ġpatient ly
aman ian
ĠTolst oy
he er
ĠMu j
ĠVitt orio
d ag
ĠB ogg
ĠH ades
ĠP DC
ĠK avan
Ġdom ed
ĠArm our
ÂłG Hz
ĠR P
Ġ15 20
oss us
ĠMah ler
bear er
ĠM aps
ĠL arger
ĠJ at
Ġen vy
Ġcomm ut
see ing
Ġpolymer ase
ĠNK VD
ĠGrum man
/ "
k ol
ion ics
Ġ16 63
ĠGr ill
ano ia
ĠValent in
Ġp ussy
ĠP uck
Ġrec o
arg a
Ġpat hetic
rid ged
ĠMind s
ĠEind hoven
M aking
Ġr apping
ĠZ ong
Ġfri ars
M es
re ferred
ĠSh ib
Ġ16 67
ple ts
ĠFour teenth
Ġmartyr dom
K u
ĠAr ag
ĠMih ail
in ha
ĠL ask
com pan
umber ing
ĠCah ill
F ried
K orean
Ġs elo
Ġde letion
ip as
ĠPol ic
ĠPod cast
Ïĥ ÏĦ
Ġt etr
ĠT ools
mer ie
SA R
ĠRo oms
Al t
Ġscler osis
ĠS ars
Ġesc ap
ĠGar age
AM P
ĠRy uk
Ġodd ly
Ã¬ nh
ĠLuh ansk
rom a
ction ed
ĠFall ing
on str
re nder
as aw
uc ible
Ġ16 26
Ġcrypt ic
K r
al pha
ax ton
ĠNikol ay
ĠS ÅĤ
rough ly
ĠCon ver
ĠCl uj
Ġherb aceous
pill ars
Ġb ile
ĠL ott
ak awa
iss ors
Ġphys icists
ĠWin field
ĠHoll is
Ġdisappro ved
p ainted
Be ing
ĠCow ard
Ġreun iting
Ġpleas ures
Ù ģ
Ġpre caution
Ġconf ection
ĠLey ton
Ġ16 55
Ġdu ets
ĠEvery body
Wh it
J u
14 2
Ġmal ignant
Ġric hes
p rem
Ġch i
ĠAn onymous
Ġmat s
int ensive
Ġaer obic
ĠAnders son
Ġjun iors
ĠGorb achev
ĠV ida
Ġpharmac ist
Ġnostalg ia
Ġplut onium
L ep
ĠT N
ĠS enn
ĠD orm
ĠN ach
Ġfl oppy
Ġbed side
ĠCre ighton
ĠOcc idental
Ġfol lic
Ġembry os
Ġc asing
ĠT eb
Ġmaterial ized
ĠMur ad
Ġheadqu arter
Ġuninter rupted
ĠFuku oka
f aces
× ¨
ĠUn ivision
aid u
Ġconnect ors
Ð¸ Ð½
Ġcurric ula
ĠExamin er
ĠAmarant he
ie vers
ĠCom anche
ÃŃ os
Ġsign ifies
Ġsal inity
Ġapolog izes
Sil ent
Ġhousew ife
Ġbrit tle
c apt
ĠR ouse
Ġind ebted
Ġ17 21
Ġint ros
ĠWest more
Ġgl ue
ĠChe et
Ġeyel ids
k iewicz
ĠH uxley
man ia
Ġdis eng
18 8
pro per
ĠNicol Ã¡s
Ġsc anner
iment o
ĠMass a
Ġsubs ets
Ġscroll s
ĠN ax
ĠLe go
Ġmajor ing
15 6
Ġrent ing
Ġbooth s
ĠHimm ler
och schule
ĠSa ab
y the
im ura
Ġaw akens
ĠFil ippo
à¥ ģ
Ġjam med
ĠSene g
ĠHerz og
E arly
H em
g ium
Ġcosm ology
Ġrer outed
Ġsymph onies
os uka
Ġro ost
ĠFl aming
achel ors
Ġinsurg ent
ĠOrph an
N atural
c ritical
m ines
Ġad hered
Ġ16 05
ĠGu ests
Ġcaus eway
ĠBeg um
ĠGonz alo
ĠBo e
ĠRu hr
ĠCham plain
Ġcohes ive
Ġdiff raction
ĠSt uff
Ã§ ao
Ġcatap ult
Ġ16 97
ĠInn ings
l ists
ĠSc hell
ĠCl uster
Ġappoin ts
Ġpsych o
Ġrisk ed
Ġintertw ined
K now
Ġh aze
Ġ16 32
sp rey
ĠDem ons
ĠHereford shire
Ġo min
ĠP ension
akes h
ĠCat tle
ĠTag alog
ĠN ara
se en
ĠMin erva
ĠMcK ee
iaz ep
Ġgly cos
Ġo zone
Ġinc est
Me et
Heb rew
ow ers
ĠH mong
ĠGen ius
Dou glas
ĠDemon str
Ġoutpost s
Ġembark ing
B ruce
K ate
ic hel
ĠC SS
ra o
Sh ar
Ġextrem ist
N ah
Ġg raft
ĠCas per
ĠL w
Ġnew found
aur u
ĠPublic ation
Ġcourage ous
Elect ronic
um as
Ġfun erals
Ġsil ica
ĠDou b
ĠGal actic
ĠDomin o
Ġquot ations
ĠJ azeera
Âł percent
Ġ16 51
hun ter
ĠHask ell
Ġch ores
Ġhum iliated
Ġcal end
Ġnarrow ing
ĠGil g
Ðµ Ð»
Ġunve iling
Lear y
ĠC inderella
ĠK oc
ĠNov os
ĠQu echua
ĠMa hesh
ĠGov t
ĠG asp
ĠRe aders
ĠÐ ´
Ġbuy out
Ġplum met
A ch
ĠRav enna
Anton io
v it
ĠP oy
Ġdef icient
Ġmon ologue
Ġ16 58
ention ally
Ġwest wards
Ġroyal ist
ĠKaun as
M ich
13 9
Ġlumin ous
D oc
Ġ uh
ĠB azar
Ġg ill
if u
Ġ17 12
els sohn
Ġband ed
Ġship yards
Ġpo ised
Ġpark land
ĠMic ah
ĠCess na
ĠEp isodes
Ġlat ent
Ġgenealog ical
ris ings
Adv anced
re aching
ĠA ux
Ġdes egreg
Ġbro om
Ind ependent
uis ance
ĠMID I
A ven
ĠP ik
ĠP ty
ĠReg istr
Ã¡ g
ĠHu ber
ĠArm ies
Ġaf loat
à ±
ĠP ays
ĠSt arl
ugg y
ĠMy les
ĠCons ulate
Ġ! !
ĠSteam ship
l oth
ĠT rafalgar
ĠMus cat
ĠRam akrishna
ak at
ĠLight weight
ĠSav i
ĠRhodes ian
L ion
ĠH ubei
ĠWe il
ĠMont ague
Ġcontrovers ially
ĠAqu arium
Îµ Î¹
ĠTheat res
g ear
Ġs uture
ar aja
ĠRe union
à¤ ²
ĠSevent een
le aning
Ġe erie
ĠF earing
Ġbl ouse
ĠGro ves
iac om
Ġpig ments
priv ile
or gh
ĠSh k
Ġoblig ated
Nich olas
Ġcan oes
ĠAnt oinette
ĠFirst ly
alo osa
Ġscar f
ĠBie ber
ĠM Ã¸
Ġsur ged
Â° .
ĠTs ing
ĠList en
Ġrally ing
Ø ¹
er ary
ox ygen
ĠGal erie
ĠBol ÃŃvar
Ġaccum ulating
C ab
ĠP ter
ĠR ugg
Ġclaim ant
ĠRa ised
Ġvisc osity
ĠLokomot iv
ĠL ubb
ĠN IT
ise i
15 1
Ġdiss idents
Ġvel oc
ĠGay e
ĠExc av
ĠT we
Ġex oner
Ġpass ions
ĠMart ini
Ġveto ed
Ġpre empt
Ġpar odied
Ġextrem ity
ĠHim achal
Ġvest ry
Ġrud imentary
Ġ15 36
ĠPel ham
Ġadvertis ers
T ab
ĠL eng
Ġr asp
18 49
18 51
r r
et ors
row er
Ġcens or
follow ing
Ãµ es
ĠPrisc illa
d ome
ĠS os
Ġher ring
Ġgr ac
Ġpercent ages
Ġop aque
icks burg
ĠPract ical
av ari
ia u
ine al
ord able
hy letic
Ġ16 53
ĠDec ker
ĠVig il
ĠM Ã©d
ĠN V
ark able
ps ka
Ġarch ived
Ġgovern s
ec s
Ġj a
ĠCl er
ĠEx tended
Ġstri pping
RA D
ĠMersey side
L ang
W er
p so
per m
ene gger
Ġcold est
ĠMagdal en
B udd
Ġa ching
ond ing
Ġ24 7
Ġ22 9
ĠTownship s
ĠWool f
Ġcontrad icted
ĠOrch id
l ou
z il
ĠI vo
ut tered
ch ings
Ġse ep
io le
Ġsl ices
Ġsnow y
sub mit
ĠMcD ermott
b ius
ĠP B
ĠAw akening
M ult
Ġl ax
Ġles bians
Beaut y
al ph
Ġsub system
Ġgl itter
ĠFin ley
Ġworth less
Hist oria
Coll ins
ĠFrÃ©dÃ© ric
Ġst umps
Ġup risings
Ġdorm itories
Æ° á»
Ġscow led
ĠP oon
iter ation
Pro fessor
Im perial
Ġcreep y
P eters
Ġin quired
ĠD read
ĠBon us
ĠCoy ote
Ġmah ogany
Ġup take
br ay
Ġste ak
Ġlibr arians
Ġsympath ies
f ant
ĠI y
ust a
ĠAg ost
Ġmid point
ĠChad wick
ĠHiber nian
ĠS agar
ess im
Ġint ram
Ġref inement
Ġdisp ens
ocent ric
3 70
ub on
Ġtr ape
Ġmeaning less
Ġd ir
ĠB ung
Ġsign ings
Ġbest selling
ĠSam u
oph ilia
T ax
é Ľ
Ġatt ains
Ġren ame
ĠSl ob
ĠA Ã©
ĠB oll
ĠU F
Ġpre occupied
ĠSh ad
Ġdi agon
Ġinterp ersonal
ĠFederal ist
ĠF ru
os ol
ĠU day
ind ependence
ĠCarn ey
b ari
Ġp uck
ĠF as
ĠV iva
Ġgreat ness
Ġrich ness
Ġneuro transmit
ĠS IG
ĠD ios
ĠW augh
ian n
of y
ĠCur se
cles field
ĠH oss
iv ol
ĠK he
ile v
Ġsk a
Ġpur plish
Ġalt ars
ĠWel come
ĠWin frey
Ġt uf
ĠP F
ub o
Ġcrew men
Ġtorpedo ed
Cast le
E duc
ĠZ and
ĠEd iting
ĠFlor ian
ĠPain ters
ĠClear water
N CAA
h ur
ap on
ĠDec can
ĠMc El
arian ce
Ã¤ m
ĠRon an
ĠSuperv isor
'' ''
Ġnip ple
l um
Ġh aw
Ġbec k
ĠLat ina
ĠSecond s
ĠGovern ing
Publ ishers
art ist
Ġ5 40
Ġext rat
ĠTV B
ĠChe ese
Ġfoot wear
ĠLy ceum
Ġdat as
ĠFill more
g ive
p is
ent ious
Ġr acks
ĠFor ms
ĠLink s
F resh
ch ik
ĠL LP
ĠW aves
od ia
ĠSt urg
ĠCo hn
Ġalleg orical
ĠEst eban
Ġgoddess es
Ġkidney s
ĠAntiqu ities
Ġc iv
ĠL aredo
ĠSa it
Ġskate board
c ertain
w ati
ĠB abb
Ġst ric
th r
ĠWil frid
ĠTrans mission
Ġge othermal
Ġveter in
ĠKaz im
ĠPur ana
Ġha unt
Ġá¼ Ĳ
Ġout lining
ĠYor uba
Ġw oo
ĠCon se
Ġorgan iser
ĠGr ady
ĠLa ver
Ġsch ism
Ġsubsid ized
Ġarc ades
S it
Ġgood will
ĠNot ice
ĠHow rah
ĠHeine ken
R as
l aid
ĠM our
igg le
Ġoverl aps
Ġbittern ess
T oy
Ġt ed
Ġbody guards
ĠMS U
ĠPharm ac
che my
build ers
e us
Ġt amb
ĠDe i
Ġenlarg ement
m ire
Ġinc ense
Ġfav oring
ĠBur rows
An imal
ĠSus ie
whe ther
ĠEdmund s
ĠGers h
f uture
Ġa str
li qu
Ġsu icidal
beknown st
ros ine
18 47
ĠUS GS
ĠSy bil
ocr at
ĠMat ches
á½ °
g arden
ap ul
Ġtemper ance
Ġrehabilit ated
ĠG ok
Ġsh udder
ĠSm ackDown
Ġvol ley
ĠNe el
Ġsyn onyms
Ġcosm opolitan
ĠNas r
Ġsquir rels
ĠYok osuka
l ene
ĠSp ell
ĠReg atta
Ġdust y
Ġdramat ist
Ġpector al
S ri
Ġmusic ologist
let a
Ġfeather weight
pert ura
ĠSc an
ĠEarth qu
Ġrend ers
od ka
res olution
Ġbin omial
ĠDy son
P in
b ene
d ensity
ab en
ĠCr ich
ĠEps ilon
ĠKalam azoo
z ag
od actyl
Ġstand point
ĠKirk land
Ġend ot
Ġhors eshoe
isp ens
ĠGilm our
ĠLingu istics
Ġr ans
all am
Ġ16 99
Ġtreat ises
ĠHeb ron
ĠNicol ae
ĠCarly le
ĠN Ã©
sh id
Ġster ling
ut ics
ĠD uf
Ġy eshiva
Ġun know
Ġphilanthrop y
ĠM OS
ĠB ute
ĠL end
ĠV ell
Ġall usion
ol ip
Ġevap oration
B uck
C B
Ġ17 29
ĠBr ing
ĠMon aghan
Ġreact ing
ÅĽ c
ĠDre xel
ep ec
ĠMan j
Ġpower less
ĠPat agon
ĠÂ »
ĠCur riculum
Ġbright est
Ġair men
iner ies
ĠFeder ated
ĠIq bal
ĠPakht unkhwa
L ac
ĠD af
ag hetti
ain ian
Ġun orthodox
âĢĿ ).
Ġop us
Ġepist em
ĠS emb
Ġ16 07
ane h
ĠBar ons
ĠTur tles
Ġmo ored
Ġforb id
Ġasc etic
Ġdwind led
ĠThiruvan anthapuram
ĠT empt
Ġco ils
wh om
Ġrev olved
Ġdismiss ing
Ġpl ume
Ġass ent
az ole
Ġ17 31
Ġrespect ful
Ġvolunte ering
ĠHorn er
ĠDest ruction
ĠClement e
Ġanarch ists
ĠZool ogical
ĠMartyr s
ĠBanc roft
b Ã¼
ĠC ens
ĠÅ Ł
Tom orrow
ĠKeep ing
Ġdisple asure
m ium
Ø Ń
Ġg ib
Ġr amb
Ġimp osition
fe aturing
Ġsarcast ic
c row
Ġpat io
Ġgun boat
Ġinterview er
ĠAsh by
Ġtub ing
G or
t our
Ġt asting
ĠB ov
ĠNe apol
ĠRob yn
pow ers
ĠEz ek
x es
ĠSe jm
Ġthr ived
ĠUt ica
JP W
ĠP ee
Al ways
ĠBart ol
Ġdemocr at
Ġguess ing
Ġfeder ations
ĠT P
ĠA RC
ĠW ulf
ĠJ ody
Ġ25 2
Ġconcentr ates
Ġslam ming
ĠAlm ighty
ĠBienn ial
ĠD ool
qu ered
eng es
Ġfloor ing
car bons
ĠDum as
h unt
ĠP ert
ĠL atham
Ġ28 5
ĠDev ine
Ġmotor ized
Lu ftwaffe
t eller
ond erry
ĠZ or
Ġfre es
Ġec umenical
ĠF aced
ĠL lew
oc eros
ĠCh rome
ater ina
ĠLy rics
Ġtrump ets
ĠCos by
ĠCister cian
rompt u
Ġextrat ropical
Ġl ashes
op lane
uz ha
Ġcontact ing
ĠLock hart
ĠGuer ra
Ġuncondition al
ĠA leg
Ġstr uts
uff ling
ti us
Ġtrem bled
ĠN elly
ĠBr ush
... )
ĠCam illa
ĠMah ade
ext ra
ĠGa on
Ġunn atural
i ros
o ides
ed ged
id ation
Ġ6 80
Ġappropri ations
Ġlou ng
ĠMyster ies
Ġterr acotta
s ounding
ans i
Ġ16 37
ĠFuk ushima
s inger
ĠSan jay
Ġmodern ism
ĠÃ §
vere in
? _
Ġre established
ĠSp ons
Ġentertain ers
ĠCab ot
ĠGres ham
et hy
ĠSp alding
ĠZam ora
ilin ear
ĠH inton
Ġcom ical
Ġch ants
ign or
Ġab orted
ve en
Âł 28
Ġspec ulate
Ġcritic izes
rast ruct
ĠBoy z
ĠMend elssohn
Ġscrap ping
ĠDum fries
Ġarom a
ĠAbsol ute
W y
W he
âĢ ī
Ġexp oses
Sp y
Phoen ix
Ø ©
ĠSt our
Ġle uc
Ġdec aying
ĠVol cano
Ste ven
ĠDipl om
Ġli abilities
Ġhumili ating
ot is
ĠK ri
Ġbother ing
id in
ĠP TS
ov ski
ĠRep orted
Ġgun boats
ĠCasc ades
ĠUmayy ad
Ġhegem ony
ĠR uk
ĠPat ric
Int ro
Mat ters
Tay lor
Ġres ettled
Ġfuck ed
ĠYar oslav
v ila
ĠK W
Ġj ars
Ġbi ochemical
Ġerrone ous
l ains
n em
et al
ubl es
D ub
M and
ĠM ids
if ted
abhar ata
ĠPodl askie
ĠS asan
Ġlic hen
ĠCop pa
ĠPack er
Cz ech
ĠK abb
ĠCort es
n uclear
Ã ľ
Ġb unk
Ġdist ort
omb re
ĠBed ouin
Law rence
mov ie
x html
Ġre hab
Ġis omer
Ġde formed
ĠCh ains
Ġout we
Ġ16 36
ĠKen yon
Ġj uries
Ġmet rics
Ġpoin ter
yal aya
Ġfaith s
ĠCart agena
Ġdiver gent
Ġpian os
Ġsurrend ering
Ġkib butz
r ub
Ġh ust
ĠL R
ĠPl unk
Ã¤ ger
ĠSuper star
Ã¡d io
ure k
Ġdisob edience
k opf
le arning
Ġcur rencies
ran os
ĠHob son
Ġmold ed
Ġseap lane
Ġs abb
ĠP ember
ĠEast bourne
Ġrevol ted
nd orf
Ġf ou
ĠG arm
if ficult
ang ir
ĠSup rem
Ġimpl ants
Ġconserv atism
F iles
ad ha
ug es
Ġ14 50
ĠMc Man
Ġremov able
ĠMond e
employ ed
ĠLay ton
ĠSaras ota
ous ing
Ġart isan
Ġold ies
ĠAss et
ĠAv ailable
Ġcart ilage
Ġham string
Ġaer ob
Ġster oid
ĠLamb da
Ġv ibe
ew ski
Ġsl um
ĠChel msford
Ham let
Elect ric
ĠDemetri us
çİ ĭ
m ell
ä ½
Ġpart itions
15 3
Ġdissent ing
he en
Ġder iving
Ġnucle otide
Ġrow ed
ĠDu arte
Ġuniform ed
Ġdub bing
Ġsqueez ing
ferm line
ĠN ip
Ġle f
Ġsn aps
Ġrid ership
ĠHeath row
Ġremod eling
Ġanomal ies
p ept
Ġqual ifies
Ã¤ s
Sh ah
Jack son
Ã©rie ure
ĠP hy
ĠP uri
art icle
Ġband leader
ĠAngel ica
unt u
Ġwrest le
Ġpant ies
Ġdet ract
isc a
ĠCr ater
Sh it
Ġshut ter
Ġmon ographs
ĠJu Ã¡rez
com put
Ġav atar
Ġsil enced
Che ck
Rec ord
3 10
ĠB WF
ĠH ager
ĠGr ind
Ġresur faced
Ġun loading
ĠMe ier
ĠMac clesfield
Ġpal ae
walk er
ĠTram way
O ak
in ters
Ġs ipped
ĠBl unt
Ġbre vet
Ġeditor ials
ĠLes ley
ĠVar an
ĠL D
ĠCh ard
imm une
Ġintimid ating
ĠG urney
Ġch ili
ĠNorth rop
Ġcup ped
Ġenroll ing
Ah mad
ĠFy odor
Maur ice
Ġt ac
Ġas p
her i
Ġreb ounded
Ġtut orial
Ġol factory
Ġun loaded
Ġlater ally
Ġ16 81
ĠTash kent
d os
Ġt outed
ĠN ett
ilit arian
ĠCont inent
29 0
ĠBea vers
T an
h pur
ĠP DP
ĠIn stant
Ġ16 47
ĠGl an
ĠFund amental
ĠOct av
ĠFus iliers
g ol
op ted
ew orld
Ġk ang
Ġab norm
Ġser oton
sh ake
Ġvict or
ĠBlack stone
ĠJal al
ĠPrec inct
Celebr ity
ĠPats y
Ġc oven
ĠS our
ĠF ist
ĠG DR
ass us
Ġ3 11
Ġage ing
com bat
ĠA IA
Ġfor ks
Ġ3 12
Ġgen omes
ij on
Ġforg ery
Ġbreed ers
ĠUttar akhand
Ġtr amp
ĠAl ert
Ġrec ite
Ġ16 23
Ġ23 8
Ġclos ures
ĠAv ignon
Ġhun ts
ĠWhe els
4 20
V lad
ĠR ack
Ġins ured
hol y
Ġvass als
ĠCh ai
Ġfl irting
Ġche at
ĠSep arate
ĠTÃ¼ bingen
V III
ĠD io
ult ures
iss i
ĠOr bit
Ġwa ver
not ably
ĠHelicop ter
ĠW RC
ĠFl ats
Ġchronic led
ĠMaid stone
rones ian
Ġscrut in
ĠDut ton
ĠF utsal
ĠEd itions
Le ft
Ã§ o
ĠMcK inney
ĠMagn etic
à® ¿
ĠCut ter
ĠIde as
fonte in
f lex
ur ring
ag ents
ĠBant u
Ġrep ainted
ĠRob b
dr um
Ġprecip itated
l aut
ĠN id
th ous
ĠAd mission
ĠLuc erne
ĠSus annah
ĠAer odrome
ĠEC HL
ĠAm ur
Ġgrow ers
ĠOsk ar
ĠStrav insky
G ang
b ucks
ĠT CP
Ġform ulate
sh are
ĠBh opal
ĠNight mare
Ġscutt led
J ag
ĠBl ount
Ġcir cling
Ġskyl ine
ĠprotÃ©g Ã©
F ight
Ġat y
ĠV ote
Ġmon oxide
Ġtax is
Ġcob alt
ĠOlsz tyn
Ġa iling
Ġcl over
per formed
ĠSh ine
ĠGu ys
ĠSur at
ĠEle venth
ĠLough borough
B oth
ĠT BS
Ġinter oper
Ġ16 18
Ġmut ated
he in
ĠM ood
ĠR Ã©g
op ping
ĠFl ushing
Ġacadem ically
ĠSel ma
mund o
ĠOpt ical
ĠPos itive
Ġimplicit ly
ĠT ain
ĠAr on
ĠRem embrance
ĠRah ul
ĠFiore nt
ĠJoaqu ÃŃn
ere z
ĠAl lend
ĠEvans ville
ĠCort Ã©s
ĠArct iinae
å ¼
arl al
Ġknowledge able
Ġrot ten
Ġmigr ations
G uy
u u
iber t
ĠCross roads
Ġsid eline
ĠLie b
an h
ĠS CO
ĠS AF
ĠE FL
Ġle p
Ġ16 82
Ġrespect ing
Ġtack ling
D ur
ater ally
Ġ16 14
ĠPlay boy
ĠRel ay
ĠBengal uru
ĠBlu etooth
Ġ ig
ĠG Ã©rard
Ġtotal itarian
Ġindist inct
ot en
Ġspec ifying
Ġcomb o
Ġvol can
ĠD EA
ĠSt al
ĠY akov
ey s
CA N
he ath
ĠP LC
ĠF ren
ĠAl bright
Ġscreen plays
ĠWhit by
Ġbenefic iary
K elly
he ar
it tal
Ġth Ðµ
av ur
ĠYoung stown
ĠSom mer
ĠBe ef
ĠAy les
ĠIde a
ĠHyd ra
ĠAkadem i
L am
u est
Ġp ines
se venth
Ġag ility
14 7
ĠBre ast
Ñ Ĩ
Ġfest ive
ĠM ors
Ġst abs
ĠF ons
ĠBre xit
opol itical
ĠRw andan
h ine
Ġc raz
ĠC ip
and aran
ry Å«
Ðµ Ð²
ĠFortun a
is burg
ĠC PA
Ġdecided ly
ĠWood en
Ġhol istic
ĠMonarch s
Ġs ans
Ġre clamation
Ġtransition ing
Ð¸ Ñĩ
ĠBrowns ville
Ġre vert
arg ill
gr ained
ĠKr av
ĠCow ell
ĠAld rich
ĠOccup ational
i av
Ġd ues
Ġ16 33
che tt
Ġobserv able
ĠVienn ese
ĠAj ay
ĠHort icultural
ĠMonto ya
K Y
M ong
ĠB accalaureate
Ġr ipping
Ġir rad
C hem
ĠC ri
ĠV ann
ecut ively
[truncated: 41,295 more chars]
