# Supplementary material
Source: ML conference proceedings conference paper supplement (https://aclanthology.org/2020.findings-emnlp.419)
Supplement: OptionalSupplementaryMaterial [file 2020.findings-emnlp.419.OptionalSupplementaryMaterial.zip › AttentionGuidance-main/attention_guidance/ag_config/roberta_8/vocab.json]

{"<s>":0,"<pad>":1,"</s>":2,"<unk>":3,"<mask>":4,"!":5,"\"":6,"#":7,"$":8,"%":9,"&":10,"'":11,"(":12,")":13,"*":14,"+":15,",":16,"-":17,".":18,"/":19,"0":20,"1":21,"2":22,"3":23,"4":24,"5":25,"6":26,"7":27,"8":28,"9":29,":":30,";":31,"<":32,"=":33,">":34,"?":35,"@":36,"A":37,"B":38,"C":39,"D":40,"E":41,"F":42,"G":43,"H":44,"I":45,"J":46,"K":47,"L":48,"M":49,"N":50,"O":51,"P":52,"Q":53,"R":54,"S":55,"T":56,"U":57,"V":58,"W":59,"X":60,"Y":61,"Z":62,"[":63,"\\":64,"]":65,"^":66,"_":67,"`":68,"a":69,"b":70,"c":71,"d":72,"e":73,"f":74,"g":75,"h":76,"i":77,"j":78,"k":79,"l":80,"m":81,"n":82,"o":83,"p":84,"q":85,"r":86,"s":87,"t":88,"u":89,"v":90,"w":91,"x":92,"y":93,"z":94,"{":95,"|":96,"}":97,"~":98,"¡":99,"¢":100,"£":101,"¤":102,"¥":103,"¦":104,"§":105,"¨":106,"©":107,"ª":108,"«":109,"¬":110,"®":111,"¯":112,"°":113,"±":114,"²":115,"³":116,"´":117,"µ":118,"¶":119,"·":120,"¸":121,"¹":122,"º":123,"»":124,"¼":125,"½":126,"¾":127,"¿":128,"À":129,"Á":130,"Â":131,"Ã":132,"Ä":133,"Å":134,"Æ":135,"Ç":136,"È":137,"É":138,"Ê":139,"Ë":140,"Ì":141,"Í":142,"Î":143,"Ï":144,"Ð":145,"Ñ":146,"Ò":147,"Ó":148,"Ô":149,"Õ":150,"Ö":151,"×":152,"Ø":153,"Ù":154,"Ú":155,"Û":156,"Ü":157,"Ý":158,"Þ":159,"ß":160,"à":161,"á":162,"â":163,"ã":164,"ä":165,"å":166,"æ":167,"ç":168,"è":169,"é":170,"ê":171,"ë":172,"ì":173,"í":174,"î":175,"ï":176,"ð":177,"ñ":178,"ò":179,"ó":180,"ô":181,"õ":182,"ö":183,"÷":184,"ø":185,"ù":186,"ú":187,"û":188,"ü":189,"ý":190,"þ":191,"ÿ":192,"Ā":193,"ā":194,"Ă":195,"ă":196,"Ą":197,"ą":198,"Ć":199,"ć":200,"Ĉ":201,"ĉ":202,"Ċ":203,"ċ":204,"Č":205,"č":206,"Ď":207,"ď":208,"Đ":209,"đ":210,"Ē":211,"ē":212,"Ĕ":213,"ĕ":214,"Ė":215,"ė":216,"Ę":217,"ę":218,"Ě":219,"ě":220,"Ĝ":221,"ĝ":222,"Ğ":223,"ğ":224,"Ġ":225,"ġ":226,"Ģ":227,"ģ":228,"Ĥ":229,"ĥ":230,"Ħ":231,"ħ":232,"Ĩ":233,"ĩ":234,"Ī":235,"ī":236,"Ĭ":237,"ĭ":238,"Į":239,"į":240,"İ":241,"ı":242,"Ĳ":243,"ĳ":244,"Ĵ":245,"ĵ":246,"Ķ":247,"ķ":248,"ĸ":249,"Ĺ":250,"ĺ":251,"Ļ":252,"ļ":253,"Ľ":254,"ľ":255,"Ŀ":256,"ŀ":257,"Ł":258,"ł":259,"Ń":260,"Ġt":261,"he":262,"Ġa":263,"in":264,"Ġthe":265,"er":266,"on":267,"re":268,"Ġo":269,"Ġs":270,"Ġw":271,"ed":272,"nd":273,"at":274,"is":275,"or":276,"en":277,"it":278,"an":279,"Ġf":280,"Ġc":281,"ar":282,"Ġof":283,"Ġin":284,"es":285,"al":286,"Ġb":287,"as":288,"ing":289,"Ġand":290,"Ġp":291,"ou":292,"ic":293,"Ġto":294,"Ġm":295,"ion":296,"Ġh":297,"Ġd":298,"le":299,"ro":300,"ĠT":301,"ĠS":302,"il":303,"ent":304,"ĠA":305,"ĠC":306,"Ġre":307,"st":308,"Ġ1":309,"om":310,"el":311,"am":312,"Ġl":313,"ĠI":314,"Ġth":315,"Ġwas":316,"Ġn":317,"ad":318,"ol":319,"ac":320,"ĠM":321,"Ġe":322,"et":323,"Ġon":324,"ec":325,"ur":326,"ĠB":327,"ĠThe":328,"Ġfor":329,"ĠH":330,"id":331,"iv":332,"ly":333,"Ġ\"":334,"Ġg":335,"Ġis":336,"Ġhe":337,"im":338,"ot":339,"ir":340,"ig":341,"ation":342,"ut":343,"ow":344,"us":345,"ĠP":346,"Ġas":347,"ter":348,"Ġ2":349,"ay":350,"âĢ":351,"ith":352,"Ġst":353,"ch":354,"Ġwith":355,"em":356,"ver":357,"un":358,"ĠR":359,"ĠD":360,"Ġbe":361,"Ġ19":362,"Ġ(":363,"ĠF":364,"ce":365,"ul":366,"ĠL":367,"and":368,"ct":369,"Ġby":370,"Ġwh":371,"ĠW":372,"ers":373,"Ġal":374,"Ġat":375,"ĠG":376,"ĠN":377,"th":378,"ist":379,"Ġan":380,"ag":381,"Ġthat":382,"Ġ20":383,"rom":384,"os":385,"her":386,"ain":387,"'s":388,"Ġcon":389,"ĠJ":390,"um":391,"av":392,"Ġr":393,"ĠE":394,"Ġit":395,"est":396,"ri":397,"Ġhis":398,"Ġfrom":399,"op":400,"ĠIn":401,"ĠO":402,"Ġcom":403,"od":404,"Ġpro":405,"oc":406,"if":407,"ill":408,"ld":409,"Ġv":410,"ab":411,"ap":412,"art":413,"ity":414,"res":415,"ate":416,"ies":417,"ud":418,"ber":419,"ak":420,"all":421,"ew":422,"igh":423,"ore":424,"Ġde":425,"Ġor":426,"ard":427,"ort":428,"Ġy":429,"up":430,"ear":431,"ĠK":432,"Ġare":433,"ant":434,"ich":435,"ĠU":436,"ess":437,"our":438,"qu":439,"ated":440,"ere":441,"Ġse":442,"ip":443,"ian":444,"ub":445,"Ġpl":446,"se":447,"Ġch":448,"Ġex":449,"ĠHe":450,"ia":451,"ive":452,"gh":453,"Ġwere":454,"ge":455,"ov":456,"ong":457,"rou":458,"ĠSt":459,"Ġ201":460,"ect":461,"ame":462,"ell":463,"nt":464,"Ġle":465,"ment":466,"ary":467,"ast":468,"ial":469,"Ġsh":470,"ust":471,"red":472,"Ġk":473,"Ġwhich":474,"Ġhad":475,"Ġher":476,"Ġsp":477,"Ġtr":478,"ĠCh":479,"ack":480,"ight":481,"ost":482,"ine":483,"ĠâĢ":484,"ep":485,"ord":486,"ave":487,"so":488,"uc":489,"Ġ200":490,"ish":491,"Ġnot":492,"ther":493,"ok":494,"ĠĊ":495,"ĠV":496,"ĠIt":497,"Ġcomp":498,"ical":499,"âĢĻ":500,"pp":501,"ork":502,"ions":503,"og":504,"Ġun":505,"ue":506,"ous":507,"Ġwhe":508,"mer":509,"cl":510,"irst":511,"00":512,"Ġalso":513,"ould":514,"Ġhas":515,"te":516,"ure":517,"ra":518,"ome":519,"ie":520,"Ġcl":521,"age":522,"ff":523,"ide":524,"hed":525,"fter":526,"Ġfirst":527,"Ġus":528,"Ġbut":529,"ass":530,"Ġar":531,"own":532,"ry":533,"ire":534,"ign":535,"iz":536,"Ġres":537,"Ġtheir":538,"out":539,"ice":540,"ans":541,"erv":542,"Ġ18":543,"ound":544,"Ġj":545,"Ġcont":546,"ond":547,"und":548,"per":549,"to":550,"wo":551,"ĠTh":552,"Ġhave":553,"Ġwho":554,"Ġab":555,"rit":556,"ater":557,"Ġone":558,"Ġits":559,"ember":560,"ric":561,"Ġad":562,"ĠUn":563,"Ġpart":564,"Ġshe":565,"\",":566,"ime":567,"ount":568,"ang":569,"act":570,"are":571,"âĢĿ":572,"ĠâĢľ":573,"Ġthis":574,"ally":575,"ach":576,"ace":577,"low":578,"ree":579,"ition":580,"pl":581,"man":582,"Ġte":583,"ult":584,"Ġag":585,"Ġapp":586,"ke":587,"Ġyear":588,"ru":589,"port":590,"ence":591,"clud":592,"),":593,"ens":594,"Ġac":595,"ations":596,"wn":597,"over":598,"ib":599,"Ġplay":600,"Ġman":601,"pt":602,"Ġup":603,"Ġout":604,"Ġbeen":605,"ĠAl":606,"Ġ3":607,"orn":608,"Ġbec":609,"lect":610,"Ġtwo":611,"land":612,"ĠY":613,"Ġper":614,"Ġro":615,"fer":616,"ational":617,"ile":618,"ade":619,"one":620,"ark":621,"ail":622,"amp":623,"Ġother":624,"Ġhim":625,"Ġyou":626,"\".":627,"Ġinclud":628,"Ġrec":629,"ind":630,"ool":631,"Ġover":632,"ng":633,"Ġen":634,"Ġthey":635,"old":636,"ild":637,"ance":638,"ory":639,"Ġsc":640,"oin":641,"Ġme":642,"Ġwork":643,"uring":644,").":645,"ough":646,"tern":647,"ates":648,"ely":649,"aw":650,"Ġkn":651,"end":652,"The":653,"Ġall":654,"for":655,"Ġafter":656,"ied":657,"ased":658,"Ġdis":659,"Ġinto":660,"ug":661,"Ġim":662,"uch":663,"ubl":664,"Ġne":665,"Ġ199":666,"ted":667,"ĠAr":668,"ents":669,"ite":670,"ited":671,"Ġcomm":672,"we":673,"able":674,"ood":675,"Ġoff":676,"anc":677,"ors":678,"ĠOn":679,"ts":680,"ress":681,"ook":682,"urn":683,"ĠAs":684,"Ġev":685,"Ġdes":686,"âĢĵ":687,"iss":688,"Ġwould":689,"chool":690,"ons":691,"Ġtime":692,"oy":693,"ward":694,"Ġpr":695,"ake":696,"ath":697,"Ġwe":698,"ase":699,"Ġnew":700,"hip":701,"Ġund":702,"ose":703,"rough":704,"ings":705,"ĠShe":706,"Ġcan":707,"les":708,"ĠMar":709,"way":710,"ivers":711,"Ġwhen":712,"vel":713,"Ġpre":714,"gan":715,"ob":716,"Ġ4":717,"Ġloc":718,"Ġserv":719,"ction":720,"Ġmore":721,"Ġunder":722,"ick":723,"Ġso":724,"Ġsec":725,"ĠLe":726,"Ġdo":727,"ious":728,"ft":729,"inal":730,"hn":731,"Ġagain":732,"Ġbet":733,"ey":734,"ĠNew":735,"Ġform":736,"oth":737,"Ġcol":738,"Ġthem":739,"ily":740,"round":741,"ren":742,"ĠCom":743,"Ġ198":744,"io":745,"ank":746,"ished":747,"Ġbu":748,"meric":749,"ilm":750,"Ġwhere":751,"Ġcons":752,"outh":753,"orld":754,"Ġonly":755,"Ġabout":756,"Ġqu":757,"Ġthere":758,"ason":759,"pe":760,"Ġreg":761,"Ġgr":762,"ollow":763,"cess":764,"Ġact":765,"rib":766,"Ġyears":767,".\"":768,"enc":769,"Ġ5":770,"Ġfe":771,"du":772,"fore":773,"ince":774,"aus":775,"ween":776,"reat":777,"Ġthen":778,"aid":779,"ual":780,"Ġret":781,"orth":782,"Ġthrough":783,"ered":784,"ah":785,"ĠThis":786,"ral":787,"form":788,"ram":789,"Ġstud":790,"ĠAmeric":791,"Ġmost":792,"ll":793,"Ġpubl":794,"Ġind":795,"Ġear":796,"Ġsup":797,"Ġpe":798,"Ġatt":799,"ron":800,"Ġfound":801,"ton":802,"Ġsome":803,"Ġmade":804,"oun":805,"Ġ197":806,"Ġteam":807,"Ġduring":808,"Ġfam":809,"au":810,"ener":811,"Ġinter":812,"Ġdec":813,"ident":814,"ike":815,"Ġrem":816,"Ġcent":817,"ix":818,"ular":819,"Ġass":820,"Ġsub":821,"ouse":822,"Ġbetween":823,"ĠRe":824,"ock":825,"air":826,"very":827,"ve":828,"Ġrel":829,"Ġmov":830,"19":831,"Ġthree":832,"ision":833,"Ġrele":834,"Ġfilm":835,"Ġ6":836,"Âł":837,"ics":838,"Ġpol":839,"Ġfollow":840,"pr":841,"duc":842,"ating":843,"ict":844,"olog":845,"Ġthan":846,"ĠSh":847,"ever":848,"iversity":849,"Ġspec":850,"az":851,"ann":852,"Ġco":853,"hes":854,"Ġmy":855,"any":856,"hen":857,"Ġused":858,".âĢĿ":859,"iel":860,"Ġgo":861,"pen":862,"Ġend":863,"Ġlater":864,"Ġback":865,"Ġsuch":866,"ative":867,"ement":868,"Ġsy":869,"roup":870,"ik":871,"led":872,"aj":873,"ities":874,"als":875,"Ġnum":876,"ived":877,"Ġam":878,"Ġpres":879,"overn":880,"Ġ196":881,"Ġbl":882,"ten":883,"Ġsecond":884,"inn":885,"Ġpop":886,"Ġdist":887,"ife":888,"oot":889,"tle":890,"other":891,"Ġcall":892,"Ġent":893,"Ġbefore":894,"Ġwell":895,"Ġfl":896,"Ġknown":897,"ĠCol":898,"Ġbecame":899,"Ġelect":900,"ters":901,"ople":902,"ĠInd":903,"ather":904,"ames":905,"Ġinc":906,"ph":907,"ject":908,"iet":909,"Ġbeing":910,"cc":911,"Ġschool":912,"ific":913,"ĠJo":914,"ros":915,"son":916,"ier":917,"Ġinv":918,"Ġno":919,"erm":920,"elf":921,"Ġprov":922,"ĠUnited":923,"arg":924,"Ġdef":925,"Ġmus":926,"Ġseason":927,"irect":928,"Ġsm":929,"ĠZ":930,"ĠAn":931,"emb":932,"Ġdid":933,"Ġset":934,"ale":935,"ĠAt":936,"ball":937,"ting":938,"Ġpos":939,"velop":940,"ĠUniversity":941,"Ġbr":942,"ury":943,"Ġfour":944,"Ġwill":945,"Ġagainst":946,"ash":947,"til":948,"Ġmany":949,"ines":950,"Ġtrans":951,"Ġcould":952,"eb":953,"ars":954,"Ġany":955,"Ġ194":956,"Ġser":957,"Ġ7":958,"tain":959,"Ġwhile":960,"Ġacc":961,"Ġrecord":962,"Ġsur":963,"ober":964,"Ġmay":965,"Ġown":966,"ty":967,"bum":968,"ĠFr":969,"iver":970,"ĠAmerican":971,"Ġincluding":972,"der":973,"Ġsaid":974,"ays":975,"Ġbro":976,"arri":977,"ĠPro":978,"ĠAfter":979,"ounc":980,"Ġexp":981,"Ġed":982,"ĠCon":983,"ley":984,"hy":985,"owever":986,"ise":987,"ept":988,"Ġart":989,"Ġlead":990,"Ġadd":991,"Ġuntil":992,"ĠSc":993,"its":994,"ĠEng":995,"Ġcount":996,"ĠCl":997,"ional":998,"Ġpeople":999,"ern":1000,"ink":1001,"ired":1002,"Ġ17":1003,"Ã©":1004,"Ġshow":1005,"Ġboth":1006,"ures":1007,"ield":1008,"Ġsing":1009,"enn":1010,"ĠFor":1011,"une":1012,"ists":1013,"Ġ195":1014,"Ġalbum":1015,"Ġem":1016,"ek":1017,"row":1018,"ared":1019,"ower":1020,"iam":1021,"Ġinst":1022,"Ġfin":1023,"ina":1024,"iew":1025,"Ġsign":1026,"Ġrep":1027,"rict":1028,"ause":1029,"Ġ8":1030,"Ġhigh":1031,"ins":1032,"ful":1033,"Ġgroup":1034,"ized":1035,"Ġfamily":1036,"Ġstart":1037,"Ġmain":1038,"000":1039,"Ġrece":1040,"ex":1041,"Ġwrit":1042,"Ġname":1043,"ĠMay":1044,"ĠSp":1045,"urch":1046,"Ġest":1047,"stem":1048,"Ġcap":1049,"ĠIs":1050,"Ġlong":1051,"Ġdevelop":1052,"Ġmed":1053,"ague":1054,"ven":1055,"Ġhead":1056,"Ġdif":1057,"ually":1058,"Ġsever":1059,"amed":1060,"vers":1061,"Ġmet":1062,"Ġnumber":1063,"ism":1064,"ĠHis":1065,"Ġoper":1066,"Ġcre":1067,"ull":1068,"Ġopen":1069,"Ġmod":1070,"ĠThey":1071,"Ġmin":1072,"Ġ9":1073,"ĠComm":1074,"Ġmon":1075,"ural":1076,"Ġdirect":1077,"ved":1078,"overnment":1079,"Ġ10":1080,"ĠBr":1081,"Ġorig":1082,"aking":1083,"Ġplayed":1084,"ĠJan":1085,"ĠWh":1086,"rap":1087,"Ġbuild":1088,"tend":1089,"Ġreleased":1090,"ĠStates":1091,"Ġarea":1092,"erman":1093,"sh":1094,"Ġmat":1095,"ĠJohn":1096,"ĠâĢĵ":1097,"Ġlike":1098,"ĠQ":1099,"Ġwon":1100,"ange":1101,"ulation":1102,"Ġcalled":1103,"uss":1104,"ained":1105,"Ġchar":1106,"Ġsong":1107,"Ġrun":1108,"Ġsame":1109,"ross":1110,"ĠWorld":1111,"Ġbel":1112,"ird":1113,"Ġ16":1114,"Ġcomple":1115,"ped":1116,"ives":1117,"Ġ15":1118,"Ġob":1119,"ution":1120,"ĠDe":1121,"arl":1122,"imes":1123,"osed":1124,"Ġgener":1125,"ax":1126,"inc":1127,"ĠAust":1128,"ĠJu":1129,"ants":1130,"ister":1131,"ĠNational":1132,"erson":1133,"Ġcontin":1134,"Ġprog":1135,"Ġseries":1136,"Ġreturn":1137,"Ġoffic":1138,"Ġann":1139,"Ġjust":1140,"Ġseveral":1141,"Ġdesign":1142,"Ġ193":1143,"Ġthese":1144,"ĠTr":1145,"Ġdown":1146,"arm":1147,"ĠThere":1148,"Ġhist":1149,"Ġsuc":1150,"arn":1151,"Ġdep":1152,"Ġwhat":1153,"ourn":1154,"ĠBrit":1155,"uro":1156,"Ġvar":1157,"els":1158,"Ġgu":1159,"Ġcur":1160,"Ġint":1161,"Ġif":1162,"Ġaround":1163,"Ġnow":1164,"Ġimp":1165,"iving":1166,"Ġsystem":1167,"ĠCount":1168,"Ġfeat":1169,"Ġconst":1170,"ĠAd":1171,"ible":1172,"uth":1173,"ised":1174,"ugust":1175,"uary":1176,"my":1177,"Ġcity":1178,"Ġhand":1179,"ĠBl":1180,"ues":1181,"Ġbegan":1182,"Ġuse":1183,"ains":1184,"cept":1185,"Ġnear":1186,"ĠPr":1187,"Ġchild":1188,"the":1189,"ially":1190,"Ġearly":1191,"xt":1192,"Ġtook":1193,"ets":1194,"Ġmusic":1195,"Ġgame":1196,"by":1197,"20":1198,"ajor":1199,"Ġfollowing":1200,"ided":1201,"ĠNov":1202,"Ġpublic":1203,"Ġstate":1204,"eptember":1205,"eng":1206,"ĠSchool":1207,"Ġprodu":1208,"ove":1209,"Ġdr":1210,"Ġsince":1211,"ute":1212,"ĠAugust":1213,"Ġair":1214,"ued":1215,"rent":1216,"Ġtown":1217,"ai":1218,"ission":1219,"ĠDec":1220,"ilt":1221,"ital":1222,"Ġins":1223,"ene":1224,"ĠSouth":1225,"Ġsmall":1226,"Ġresp":1227,"oci":1228,"por":1229,"ient":1230,"Ġdisc":1231,"fess":1232,"duced":1233,"ĠSeptember":1234,"Ġph":1235,"vent":1236,"ĠCan":1237,"ured":1238,"oman":1239,"abl":1240,"Ġeach":1241,"alk":1242,"br":1243,"ĠMarch":1244,"Ġorgan":1245,"ĠJune":1246,"ĠGerman":1247,"Ġplace":1248,"ctober":1249,"ior":1250,"ĠWar":1251,"augh":1252,"Ġpass":1253,"ility":1254,"ĠBe":1255,"Ġbook":1256,"ruct":1257,"Ġhouse":1258,"Ġstr":1259,"Ġalong":1260,"Ġformer":1261,"ĠOr":1262,"ically":1263,"Ġland":1264,"aving":1265,"ĠJanuary":1266,"aced":1267,"Ġ12":1268,"ĠJuly":1269,"Ġcare":1270,"ces":1271,"Ġeff":1272,"Ġpoin":1273,"icip":1274,"ĠPh":1275,"omet":1276,"Ġprom":1277,"pril":1278,"ĠYork":1279,"Ġjoin":1280,"Ġheld":1281,"ternational":1282,"ium":1283,"ĠAll":1284,"ĠOctober":1285,"ret":1286,"..":1287,"Ġright":1288,"Ġthough":1289,"Ġdiffer":1290,"omen":1291,"ane":1292,"ootball":1293,"Ġsim":1294,"Ġhel":1295,"Ġhome":1296,"Ġcommun":1297,"lege":1298,"Ġinf":1299,"Ġsupport":1300,"ĠGr":1301,"ĠApril":1302,"oard":1303,"Ġgovernment":1304,"rist":1305,"con":1306,"ĠCent":1307,"Ġclass":1308,"Ġlocated":1309,"ments":1310,"Ġocc":1311,"Ġworld":1312,"ampions":1313,"ales":1314,"ĠPl":1315,"Ġ'":1316,"uck":1317,"Ġprogram":1318,"ĠEuro":1319,"Ġvill":1320,"Ġband":1321,"ox":1322,"Ġold":1323,"Ġlast":1324,"ages":1325,"Ġleft":1326,"ĠNovember":1327,"Ġresult":1328,"Ġpopulation":1329,"Ġcompet":1330,"ple":1331,"ology":1332,"embers":1333,"Ġbecause":1334,"ĠDecember":1335,"ract":1336,"ble":1337,"Ġ-":1338,"ck":1339,"resent":1340,"18":1341,"Ġstill":1342,"Ġtit":1343,"rop":1344,"af":1345,"ĠAnd":1346,"ĠSe":1347,"arge":1348,"ĠCounty":1349,"Ġlook":1350,"orm":1351,"ĠNorth":1352,"Ġnamed":1353,"ately":1354,"Ġsl":1355,"ĠGe":1356,"wards":1357,"ices":1358,"ĠHowever":1359,"Ġday":1360,"Ġmajor":1361,"Ġsuccess":1362,"ery":1363,"Ġcour":1364,"Ġ$":1365,"aining":1366,"Ġcompany":1367,"Ġeven":1368,"oss":1369,"Ġlocal":1370,"Ġclub":1371,"Ġlit":1372,"ĠAustral":1373,"Ġage":1374,"get":1375,"Ġbus":1376,"lev":1377,"ae":1378,"Ġdesc":1379,"Ġ2010":1380,"Ġlife":1381,"self":1382,"ĠMus":1383,"Ġrest":1384,"ĠBritish":1385,"ling":1386,"Ġappear":1387,"min":1388,"ently":1389,"ĠAss":1390,"Ġmember":1391,"Ġpolit":1392,"ored":1393,"ection":1394,"ne":1395,"Ġcar":1396,"Ġestabl":1397,"med":1398,"Ġevery":1399,"Ġreceived":1400,"mp":1401,"ival":1402,"Ġ11":1403,"Ġserved":1404,"ebru":1405,"ĠCity":1406,"ience":1407,"ebruary":1408,"illion":1409,"Ġref":1410,"Ġ14":1411,"iness":1412,"Ġturn":1413,"tal":1414,"Ġknow":1415,"Ġstation":1416,"Ġmembers":1417,"ĠEurope":1418,"though":1419,"Ġext":1420,"Ġfinal":1421,"echn":1422,"Ġline":1423,"Ġcr":1424,"Ġtri":1425,"Ġevent":1426,"ĠHer":1427,"Ġ13":1428,"ony":1429,"Ġmake":1430,"Ġget":1431,"ody":1432,"Ġ192":1433,"born":1434,"Ġborn":1435,"ham":1436,"ĠFebruary":1437,"Ġeng":1438,"'t":1439,"Ġvery":1440,"Ġsingle":1441,"ung":1442,"view":1443,"hest":1444,"ats":1445,"Ġway":1446,"earch":1447,"Ġterm":1448,"Ġlist":1449,"yl":1450,"let":1451,"Ġbuilt":1452,"erg":1453,"Ġconc":1454,"arr":1455,"ians":1456,"Ġappro":1457,"ĠAm":1458,"ator":1459,"Ġ2011":1460,"ides":1461,"ilit":1462,"rew":1463,"ĠPol":1464,"Ġdet":1465,"ampionship":1466,"reen":1467,"Ġreport":1468,"Ġcharac":1469,"Ġwithin":1470,"?âĢĿ":1471,"arried":1472,"ording":1473,"ĠWill":1474,"Ġrefer":1475,"Ġthose":1476,"ott":1477,"Ġlarge":1478,"ison":1479,"ĠUS":1480,"Ġsix":1481,"Ġbased":1482,"Ġmuch":1483,"Ġanother":1484,"Ġcontro":1485,"Ġneed":1486,"isc":1487,"Ġinclude":1488,"ady":1489,"Ġty":1490,"ality":1491,"Ġmark":1492,"Ġsoc":1493,"uff":1494,"Ġnorth":1495,"ĠGu":1496,"Ġ2012":1497,"ected":1498,"ified":1499,"riend":1500,"iven":1501,"Ġfive":1502,"Ġlaw":1503,"ched":1504,"ĠKing":1505,"aim":1506,"com":1507,"iety":1508,"Ġconf":1509,"ined":1510,"Ġperson":1511,"Ġconsid":1512,"ĠBro":1513,"ĠLeague":1514,"ĠState":1515,"ĠDuring":1516,"Ġ(\"":1517,"Ġdeath":1518,"aster":1519,"Ġstand":1520,"que":1521,"ograp":1522,"ĠEd":1523,"atic":1524,"Ġrequ":1525,"me":1526,"Ġcamp":1527,"Ġpresent":1528,"day":1529,"Ġallow":1530,"itions":1531,"ĠCo":1532,"Ġcentury":1533,"ĠCanad":1534,"akes":1535,"Ġbuilding":1536,"Ġcame":1537,"sp":1538,"ĠChrist":1539,"Ġtop":1540,"Ġdue":1541,"ĠCal":1542,"Ġnational":1543,"ĠII":1544,"Ġspecies":1545,"ert":1546,"Ġ2014":1547,"ively":1548,"Ġprofess":1549,"ivision":1550,",âĢĿ":1551,"ĠWhen":1552,"ĠAf":1553,"Ġvillage":1554,"Ġ2013":1555,"Ġdifferent":1556,"iod":1557,"Ġcurrent":1558,"Ġpublished":1559,"Ġdied":1560,"Ġside":1561,"ont":1562,"Ġ2009":1563,"Ġwater":1564,"Ġdeb":1565,"Ġbre":1566,"Ġ2008":1567,"Ġleg":1568,"ness":1569,"ille":1570,"aly":1571,"ĠWest":1572,"Ġshort":1573,"Ġadv":1574,"Ġ191":1575,"ĠRep":1576,"ief":1577,"Ġmoved":1578,"ask":1579,"Ġ.":1580,"ature":1581,"rench":1582,"Ġdescrib":1583,"Ġincluded":1584,"Ġlarg":1585,"ublic":1586,"oor":1587,"ĠMan":1588,"Ġdem":1589,"alth":1590,"vious":1591,"Ġprot":1592,"Ġrepl":1593,"Ġsouth":1594,"ering":1595,"Ġvers":1596,"reet":1597,"Ġthird":1598,"Ġval":1599,"ode":1600,"Ġwant":1601,"Ġcover":1602,"Ġ2015":1603,"Ġrepresent":1604,"hing":1605,"Ġpower":1606,"Ġmen":1607,"Ġmanag":1608,"ĠCar":1609,"Ġchildren":1610,"Ġfootball":1611,"lish":1612,"Ġbest":1613,"urg":1614,"side":1615,"idd":1616,"alf":1617,"Ġwent":1618,"Ġvis":1619,"Ġopp":1620,"Ġtake":1621,"ĠMin":1622,"Ġav":1623,"omin":1624,"Ġfew":1625,"ner":1626,"Ġ&":1627,"Ġsk":1628,"ech":1629,"ize":1630,"gr":1631,"aces":1632,"ĠMc":1633,"aff":1634,"Ġfather":1635,"Ġel":1636,"ords":1637,"Ġarr":1638,"Ġson":1639,"inning":1640,"Ġincre":1641,"Ġ2016":1642,"Ġ2006":1643,"estern":1644,"Ġgl":1645,"Ġpost":1646,"Ġhum":1647,"ula":1648,"uthor":1649,"ĠAb":1650,"Ġ2007":1651,"ĠGeor":1652,"âĢĶ":1653,"ency":1654,"ization":1655,"ying":1656,"ĠDist":1657,"Ġcor":1658,"ĠEl":1659,"ĠSw":1660,"stit":1661,"ĠWe":1662,"Ġexper":1663,"Ġpar":1664,"ards":1665,"idge":1666,"Ġstarted":1667,"Ġperform":1668,"tended":1669,"Ġled":1670,"ĠFrench":1671,"ĠEx":1672,"Ġtrad":1673,"ences":1674,"yn":1675,"ĠEnglish":1676,"work":1677,"Ġperiod":1678,"Ġkill":1679,"Ġbeg":1680,"Ġshould":1681,"Ġoften":1682,"Ġaddition":1683,"oad":1684,"Ġep":1685,"ouncil":1686,"ese":1687,"Ġposs":1688,"eder":1689,"apan":1690,"angu":1691,"Ġyour":1692,"Ġiss":1693,"Ġimport":1694,"Ġ25":1695,"Ġexpl":1696,"Ġnext":1697,"ms":1698,"Ġsw":1699,"Ġla":1700,"ĠReg":1701,"Ġsee":1702,"sc":1703,"Ġsit":1704,"app":1705,"Ġcareer":1706,"ĠBy":1707,"Ġpat":1708,"Ġlevel":1709,"ĠFl":1710,"eter":1711,"Ġbat":1712,"Ġbeh":1713,"ĠHigh":1714,"Ġask":1715,"Ġfact":1716,"ĠCollege":1717,"Ġ190":1718,"Ġproject":1719,"Ġmonth":1720,"Ġequ":1721,"Ġcrit":1722,"Ġannounc":1723,"ĠBar":1724,"Ġspe":1725,"ves":1726,"par":1727,"ondon":1728,"Ġoriginal":1729,"Ġeduc":1730,"Ġlate":1731,"Ġamong":1732,"Ġtw":1733,"Ġ2017":1734,"ches":1735,"ĠPart":1736,"Ġfore":1737,"ps":1738,"ee":1739,"Ġwomen":1740,"Ġattack":1741,"ĠYou":1742,"Ġes":1743,"ĠPar":1744,"Ġsold":1745,"Ã¡":1746,"Ġgood":1747,"raft":1748,"Ġorder":1749,"Ġyoung":1750,"ront":1751,"Ġhow":1752,"ana":1753,"artment":1754,"ached":1755,"urs":1756,"Ġsomet":1757,"\")":1758,"Ġcountry":1759,"Ġservice":1760,"Ġbusiness":1761,"ĠWilliam":1762,"ĠPark":1763,"Ġaway":1764,"Ġnon":1765,"Ġship":1766,"ington":1767,"Ġwar":1768,"Ġ30":1769,"ĠRuss":1770,"ĠPres":1771,"ĠJapan":1772,"Ġport":1773,"ĠLondon":1774,"Ġweek":1775,"Ġfind":1776,"Ġwin":1777,"ata":1778,"Ġnever":1779,"adu":1780,"ĠSy":1781,"ĠAfric":1782,"ford":1783,"ĠAir":1784,"Ġappe":1785,"Ġ<":1786,"ĠX":1787,",\"":1788,"umb":1789,"ribut":1790,"ĠSec":1791,"ĠRiver":1792,"adem":1793,"Ġcollect":1794,"ĠWith":1795,"lu":1796,"empt":1797,"Ġaff":1798,"ument":1799,"ĠOne":1800,"osp":1801,"Ġchang":1802,"ĠDistrict":1803,"ald":1804,"leg":1805,"Ġbecome":1806,"ilitary":1807,"Ġmillion":1808,"ĠComp":1809,"Ġreal":1810,"line":1811,"Ġprevious":1812,"Ġtitle":1813,"yle":1814,"Ġgreat":1815,"Ġfriend":1816,"Ġinvol":1817,"ases":1818,"Ġ2018":1819,"Ġhaving":1820,"Ġey":1821,"ilar":1822,"Ġfac":1823,"Ġpain":1824,"10":1825,"ĠTe":1826,"Ġgiven":1827,"ries":1828,"ape":1829,"Ġgames":1830,"ino":1831,"ploy":1832,"hel":1833,"Ġtrack":1834,"ze":1835,"Ġestablished":1836,"istr":1837,"Ġsol":1838,"ruction":1839,"Ġ189":1840,"Ġdistrict":1841,"Ġrole":1842,"ones":1843,"Ġhistory":1844,"Ġmag":1845,"ced":1846,"ĠAcc":1847,"na":1848,"hem":1849,"uk":1850,"urther":1851,"ense":1852,"Ġdel":1853,"Ġcharacter":1854,"aul":1855,"Ġrad":1856,"ention":1857,"ead":1858,"ara":1859,"Ġfield":1860,"of":1861,"Ġtechn":1862,"Ġcommon":1863,"mit":1864,"Ġeffect":1865,"Ġwithout":1866,"ĠDav":1867,"ĠCor":1868,"ĠAng":1869,"ler":1870,"ummer":1871,"Ġfre":1872,"epend":1873,"aken":1874,"Ġworked":1875,"Ġaward":1876,"be":1877,"Ġauthor":1878,"Ġhelp":1879,"ole":1880,"ĠMed":1881,"oon":1882,"ĠSoc":1883,"Ġvarious":1884,"levision":1885,"hat":1886,"Ġreturned":1887,"Ġorigin":1888,"Ġ24":1889,"ran":1890,"Ġdon":1891,"Ġinit":1892,"ĠThese":1893,"Ġprocess":1894,"reg":1895,"ev":1896,"Ġtotal":1897,"Ġlet":1898,"avy":1899,"conom":1900,"rote":1901,"ĠHar":1902,"Ġstat":1903,"rest":1904,"Ġvot":1905,"ĠDr":1906,"ories":1907,"Ġannounced":1908,"Ġmarried":1909,"eth":1910,"rick":1911,"Ġprop":1912,"ances":1913,"Ġspecial":1914,"Ġusing":1915,"Ġactiv":1916,"Ġsent":1917,"Ġcommunity":1918,"Ġclaim":1919,"Ġstudents":1920,"ĠEngland":1921,"Ġjoined":1922,"Ġfun":1923,"ĠHouse":1924,"ociation":1925,"Ġfem":1926,"Ġhowever":1927,"lin":1928,"cent":1929,"ĠBut":1930,"Ġappoin":1931,"Ġround":1932,"eneral":1933,"ivid":1934,"Ġarch":1935,"Ġcult":1936,"Ġtimes":1937,"ecut":1938,"ĠChampionship":1939,"Ġplayer":1940,"Ġcontinued":1941,"irl":1942,"ament":1943,"err":1944,"duct":1945,"ably":1946,"Ġproduced":1947,"Ġpromot":1948,"irc":1949,"ĠCup":1950,"iber":1951,"ĠPhil":1952,"Ġcreated":1953,"less":1954,"gether":1955,"Ġtogether":1956,"Ġ,":1957,"Ġlight":1958,"Ġfull":1959,"Ġdoes":1960,"Ġgen":1961,"abor":1962,"ising":1963,"Ġdebut":1964,"Ġ2005":1965,"Ġdefe":1966,"hern":1967,"Ġdevelopment":1968,"Ġhistor":1969,"ream":1970,"Ġlangu":1971,"Ġbody":1972,"ĠNo":1973,"ĠSan":1974,"raw":1975,"elt":1976,"Ġhold":1977,"sk":1978,"ning":1979,"arent":1980,"Ġposition":1981,"lic":1982,"ĠDep":1983,"ĠInternational":1984,"cast":1985,"Ġgeneral":1986,"ĠEn":1987,"hold":1988,"Ġ188":1989,"ops":1990,"Ġdays":1991,"Ġopened":1992,"ĠSup":1993,"ested":1994,"ugg":1995,"Ġtem":1996,"Ġdescribed":1997,"ĠMe":1998,"Ġbrother":1999,"Ġpopular":2000,"ĠEast":2001,"Ġhalf":2002,"Ġ21":2003,"Ġhig":2004,"ĠRes":2005,"Ġwritten":2006,"Ġpartic":2007,"Ġhimself":2008,"ways":2009,"de":2010,"ĠIndian":2011,"omb":2012,"ĠGl":2013,"astern":2014,"Ġcle":2015,"ots":2016,"Ġwrote":2017,"forman":2018,"amb":2019,"used":2020,"ĠFrom":2021,"urb":2022,"Ġsay":2023,"orthern":2024,"Ġlost":2025,"atch":2026,"Ġinform":2027,"ither":2028,"Ġprim":2029,"off":2030,"oll":2031,"ours":2032,"lands":2033,"Ġhost":2034,"oyal":2035,"ogn":2036,"Ġcontrol":2037,"sequ":2038,"Ġpract":2039,"Ġ2000":2040,"most":2041,"=\"":2042,"co":2043,"Ġput":2044,"ĠAccording":2045,"ministr":2046,"ster":2047,"ĠRec":2048,"Ġpolitical":2049,"Ġroad":2050,"Ġattempt":2051,"rug":2052,"Ġsimilar":2053,"Ġbelie":2054,"Ġsqu":2055,"Ġthink":2056,"ander":2057,"alt":2058,"outher":2059,"ript":2060,"ivil":2061,"Ġaver":2062,"ests":2063,"Ġstory":2064,"50":2065,"Ġmeet":2066,"Ġtoo":2067,"ĠChurch":2068,"Ġpoint":2069,"Ġroom":2070,"ample":2071,"Ġimportant":2072,"eep":2073,"Ġchurch":2074,"Ġsite":2075,"outhern":2076,"ti":2077,"ope":2078,"Ã³":2079,"iron":2080,"ĠSer":2081,"Ġrail":2082,"ĠPresident":2083,"Ġintro":2084,"Ġpri":2085,"Ġproduction":2086,"ividual":2087,"Ġgoing":2088,"Ġlim":2089,"ĠMich":2090,"ĠAg":2091,"aughter":2092,"Ġ2004":2093,"Ġ100":2094,"Ġ186":2095,"Ġworks":2096,"Ġacross":2097,"Ġepis":2098,"Ġmatch":2099,"hys":2100,"ĠAc":2101,"Ġappeared":2102,"orts":2103,"Ġmaking":2104,"ĠLa":2105,"ĠEm":2106,"Ġcomb":2107,"Ġ22":2108,"Ġless":2109,"itor":2110,"ertain":2111,"Ġoffer":2112,"Ġversion":2113,"Ġmother":2114,"Ġconsidered":2115,"now":2116,"Ġregion":2117,"Ġgrow":2118,"ĠRoman":2119,"Ġmilitary":2120,"Ġparticip":2121,"ĠIndia":2122,"lex":2123,"Ġproper":2124,"ellow":2125,"Ġofficial":2126,"Ġview":2127,"Ġconn":2128,"ĠAustralia":2129,"aged":2130,"Ġnight":2131,"St":2132,"Ġvide":2133,"acy":2134,"Ġfurther":2135,"ĠMon":2136,"Ġmust":2137,"etwork":2138,"Ġelection":2139,"ades":2140,"ination":2141,"ĠStreet":2142,"Ġ0":2143,"ĠPe":2144,"Ġtelevision":2145,"oice":2146,"iment":2147,"Ġground":2148,"17":2149,"ĠCouncil":2150,"Ġgave":2151,"Ġdest":2152,"iforn":2153,"Ġbroad":2154,"unicip":2155,"Ġindust":2156,"ĠPer":2157,"Ġothers":2158,"ĠRepublic":2159,"ĠArmy":2160,"Ġlow":2161,"ĠEuropean":2162,"Ġ[":2163,"Ġwife":2164,"Ġperforman":2165,"rem":2166,"Ġengine":2167,"Ġbas":2168,"Ġ23":2169,"Ġident":2170,"reek":2171,"ĠFrance":2172,"Ġworking":2173,"Ġsurv":2174,"eum":2175,"ha":2176,"Ġcaus":2177,"Ġparty":2178,"Ġfounded":2179,"ĠArt":2180,"ĠSm":2181,"Ġvol":2182,"uit":2183,"hic":2184,"Ġinternational":2185,"ifornia":2186,"ĠAct":2187,"Ġindividual":2188,"200":2189,"Ġide":2190,"here":2191,"ius":2192,"Ġpriv":2193,"key":2194,"Ġonce":2195,"iles":2196,"iting":2197,"ĠSch":2198,"iding":2199,"Ġlittle":2200,"Ġrecorded":2201,"Ġparticular":2202,"ĠDes":2203,"ocr":2204,"tion":2205,"Ġ187":2206,"uel":2207,"Ġdidn":2208,"Ġhere":2209,"ney":2210,"12":2211,"ĠCalifornia":2212,"ĠParty":2213,"Ġinvest":2214,"hib":2215,"Ġpo":2216,"Ġinflu":2217,"bor":2218,"att":2219,"Ġmult":2220,"aper":2221,"Ġblack":2222,"Ġsocial":2223,"Ġthought":2224,"ishing":2225,"Ġresearch":2226,"ĠGeneral":2227,"ica":2228,"Ġfront":2229,"Ġsound":2230,"year":2231,"ico":2232,"Ġeast":2233,"ĠWhile":2234,"field":2235,"Ġrock":2236,"ĠAmerica":2237,"Ġoffice":2238,"ĠNor":2239,"Ġcase":2240,"Ġprofessional":2241,"Ġformed":2242,"Ġmid":2243,"ĠChar":2244,"ĠCour":2245,"Ġsaw":2246,"Ġfire":2247,"Ġread":2248,"int":2249,"Ġeconom":2250,"Ġhuman":2251,"ĠJames":2252,"Ġten":2253,"ef":2254,"itte":2255,"ama":2256,"oney":2257,"ills":2258,"dom":2259,"olution":2260,"idence":2261,"era":2262,"ring":2263,"imately":2264,"ĠDivision":2265,"ells":2266,"Ġexist":2267,"iddle":2268,"ological":2269,"ateg":2270,"Ġliving":2271,"Ġsigned":2272,"ĠHol":2273,"Ġfund":2274,"ush":2275,"Ġareas":2276,"Ġlive":2277,"ĠQue":2278,"Ġgradu":2279,"Ġfail":2280,"Ġtradition":2281,"ville":2282,"ĠPort":2283,"Ġexample":2284,"Ġwest":2285,"Ġseen":2286,"aves":2287,"Ġavail":2288,"Ġ26":2289,"Ġelected":2290,"Ġstruct":2291,"ĠVal":2292,"ĠCanada":2293,"Ġdeveloped":2294,"Ġren":2295,"Ġhon":2296,"Ġappointed":2297,"Ġaverage":2298,"Ġfree":2299,"Ġhous":2300,"Ġtrav":2301,"ÃŃ":2302,"...":2303,"Ġselect":2304,"Ġ28":2305,"aign":2306,"Ġtour":2307,"ĠThom":2308,"Ġtyp":2309,"Ġstrong":2310,"16":2311,"ma":2312,"15":2313,"Ġcond":2314,"Ġrelease":2315,"ĠBat":2316,"ĠSome":2317,"Ġele":2318,"ership":2319,"Ġvict":2320,"ĠGeorge":2321,"Ġcoll":2322,"ĠMor":2323,"Ã¼":2324,"ship":2325,"Ġfollowed":2326,"BC":2327,"Ġmot":2328,"Ġdiv":2329,"Ġ27":2330,"Ġcome":2331,"Ġalthough":2332,"Ġreported":2333,"Ġemploy":2334,"Ġtaken":2335,"bs":2336,"Ġpresident":2337,"Ġeyes":2338,"Ġaut":2339,"ensus":2340,"ĠBel":2341,"ference":2342,"wh":2343,"iol":2344,"Ġproduct":2345,"Ġmar":2346,"Ġ2003":2347,"Ġplaying":2348,"Ġnov":2349,"Ġrecogn":2350,"Ġformula":2351,"ged":2352,"pite":2353,"anish":2354,"Ġdeg":2355,"ael":2356,"ĠRober":2357,"Ġ1990":2358,"Ġface":2359,"ipp":2360,"anded":2361,"Ġteams":2362,"Ġfoc":2363,"Ġrelations":2364,"ule":2365,"Ġfall":2366,"Ġasked":2367,"Ġmater":2368,"Ġreview":2369,"lymp":2370,"Ġra":2371,"ĠAssociation":2372,"Ġcontract":2373,"Ġeight":2374,"rown":2375,"ĠPal":2376,"stand":2377,"Ġbehind":2378,"Ġgot":2379,"Ġsuccessful":2380,"ger":2381,"Ġour":2382,"ĠMy":2383,"thing":2384,"ĠRich":2385,"Ġord":2386,"ĠLou":2387,"ressed":2388,"aut":2389,"Ġcross":2390,"itive":2391,"Ġred":2392,"ĠQu":2393,"Ġcast":2394,"Ġpoints":2395,"ania":2396,"Ġproduc":2397,"Ġable":2398,"Ġwind":2399,"Ġsignific":2400,"aint":2401,"ought":2402,"Ġdev":2403,"ĠOlymp":2404,"li":2405,"ĠRoyal":2406,"udd":2407,"Ġce":2408,"Ġstop":2409,"Ġrace":2410,"ĠTo":2411,"ibr":2412,"Ġmodern":2413,"Ġhy":2414,"Ġdaughter":2415,"Ġmonths":2416,"Ġsuff":2417,"ĠUnion":2418,"Ġfinished":2419,"Ġevents":2420,"oute":2421,"Ġhard":2422,"elling":2423,"ari":2424,"Ġavailable":2425,"Ġvideo":2426,"Ġlaun":2427,"Ġsepar":2428,"Ġrank":2429,"ĠAnt":2430,"Ġfight":2431,"Ġservices":2432,"ĠMal":2433,"ceed":2434,"ago":2435,"Ġclose":2436,"ĠGermany":2437,"Ġindepend":2438,"Ġcoach":2439,"ili":2440,"ris":2441,"stitute":2442,"Ġpast":2443,"ming":2444,"ett":2445,"uf":2446,"Ġcost":2447,"olic":2448,"ensive":2449,"eal":2450,"Ġplan":2451,"Ġdirector":2452,"ournal":2453,"Ġ2002":2454,"ĠHall":2455,"Ġproble":2456,"Ġmean":2457,"str":2458,"ators":2459,"aps":2460,"ĠDem":2461,"Ġrev":2462,"Ġbecom":2463,"ĠâĢĺ":2464,"utes":2465,"iec":2466,"Ġ2001":2467,"ĠPaul":2468,"Th":2469,"itect":2470,"Ġagre":2471,"Ġeducation":2472,"Ġ1980":2473,"Ġve":2474,"ĠAward":2475,"ittee":2476,"Ch":2477,"ĠAustralian":2478,"ĠPat":2479,"ĠRoad":2480,"wood":2481,"estival":2482,"ĠSen":2483,"ements":2484,"Ġremained":2485,"nder":2486,"ĠDavid":2487,"Ġ2019":2488,"Ġadministr":2489,"Ġenc":2490,"Ġrul":2491,"Ġlanguage":2492,"Ġbase":2493,"Ġdam":2494,"30":2495,"Ġentire":2496,"tt":2497,"Ġclos":2498,"head":2499,"roy":2500,"Ġstyle":2501,"Ġsil":2502,"ij":2503,"Ġassist":2504,"igned":2505,"istic":2506,"Ġfar":2507,"Ġever":2508,"hers":2509,"ĠJack":2510,"ĠRed":2511,"14":2512,"Ġleast":2513,"Ġreached":2514,"Ġkeep":2515,"Ġperformed":2516,"ĠNe":2517,"arliam":2518,"han":2519,"airs":2520,"Ġbo":2521,"Ġcou":2522,"Ġcurrently":2523,"chie":2524,"ened":2525,"Ġcampaign":2526,"play":2527,"ĠAlthough":2528,"Ġwhite":2529,"Ġtre":2530,"Ġseem":2531,"Ġeither":2532,"Ġcirc":2533,"Ġ29":2534,"ĠMary":2535,"Ġhousehold":2536,"ĠCompany":2537,"rought":2538,"fic":2539,"Ġregular":2540,"bert":2541,"arliament":2542,"Ġmarket":2543,"Ġdiscover":2544,"Ġturned":2545,"ĠJos":2546,"ĠHen":2547,"cle":2548,"Ġfeatures":2549,"aur":2550,"Ġphys":2551,"ĠCourt":2552,"ential":2553,".,":2554,"Ġalmost":2555,"km":2556,"You":2557,"west":2558,"Ġimpro":2559,"Ġsugg":2560,"Ġsongs":2561,"ilies":2562,"Ġdesigned":2563,"ification":2564,"Ġsour":2565,"Ġfeel":2566,"read":2567,"ĠNot":2568,"Ġthroughout":2569,"Ġinformation":2570,"Ġcompleted":2571,"val":2572,"Ġflow":2573,"Ġmaterial":2574,"atural":2575,"ĠSam":2576,"oph":2577,"Ġmunicip":2578,"ĠFranc":2579,"Ġleague":2580,"ks":2581,"Ġhit":2582,"enced":2583,"Ġgirl":2584,"erous":2585,"Ġupon":2586,"ĠOff":2587,"ĠMo":2588,"ights":2589,"anch":2590,"ĠIf":2591,"Ġconstruction":2592,"ump":2593,"Ġche":2594,"ude":2595,"Ġlargest":2596,"Ã¶":2597,"Ġpress":2598,"Ġincludes":2599,"ĠSince":2600,"craft":2601,"ĠBer":2602,"pro":2603,"ĠPri":2604,"isl":2605,"Ġacqu":2606,"hod":2607,"13":2608,"Ġseven":2609,"ĠMex":2610,"arter":2611,"Ġwalk":2612,"ecutive":2613,"ederal":2614,"Ġadded":2615,"time":2616,"Ġdoc":2617,"ĠCentral":2618,"Ġ1970":2619,"ĠHist":2620,"ston":2621,"Ġabove":2622,"Ġdou":2623,"ĠChina":2624,"ique":2625,"acing":2626,"Ġeventually":2627,"Ġmount":2628,"ware":2629,"ĠStud":2630,"rey":2631,"sel":2632,"Ġleading":2633,"ospital":2634,"Ġanim":2635,"Ġoriginally":2636,"Ġlab":2637,"men":2638,"Ġsat":2639,"raz":2640,"Ġinvolved":2641,"iers":2642,"Ġsignificant":2643,"Ġtraining":2644,"Ġsoon":2645,"Ġlearn":2646,"Ġfeatured":2647,"asing":2648,"ademy":2649,"igr":2650,"Ġpur":2651,"Ġplayers":2652,"Ġpark":2653,"Ġassoci":2654,"Ġstudy":2655,"Ġforces":2656,"ilities":2657,"ĠIsland":2658,"ashington":2659,"rian":2660,"Ġaccess":2661,"CA":2662,"Ġkilled":2663,"ĠGod":2664,"ĠFirst":2665,"pect":2666,"azine":2667,"atter":2668,"Ġdecided":2669,"Ġ50":2670,"Ġbank":2671,"ready":2672,"ĠRail":2673,"Ġboard":2674,"ĠMart":2675,"eck":2676,"ĠUK":2677,"Ġphot":2678,"ĠMag":2679,"ya":2680,"ournament":2681,"Ġrelig":2682,"ĠAlex":2683,"iff":2684,"ĠDepartment":2685,"ĠBlack":2686,"Ġwid":2687,"Ġz":2688,"Ġconsist":2689,"medi":2690,"ores":2691,"Ġmiss":2692,"Ġqual":2693,"itz":2694,"ability":2695,"Ġ()":2696,"oul":2697,"aker":2698,"Ġsitu":2699,"Ġwoman":2700,"Ġchange":2701,"Ġfig":2702,"Ġschools":2703,"ĠSte":2704,"che":2705,"Ġrespons":2706,"ges":2707,"Ġradio":2708,"Ġquest":2709,"burg":2710,"ands":2711,"viron":2712,"Ġdirected":2713,"Ġgroups":2714,"Ġtest":2715,"ength":2716,"ply":2717,"ĠIts":2718,"Ġsomething":2719,"ergy":2720,"ĠCap":2721,"Ġbrought":2722,"Ġgoal":2723,"sy":2724,"Ġ1999":2725,"asons":2726,"Ġaccept":2727,"ĠClub":2728,"gin":2729,"ĠCenter":2730,"ĠMount":2731,"Ġusually":2732,"Ġepisode":2733,"11":2734,"Ġlove":2735,"ĠItal":2736,"ĠTown":2737,"itch":2738,"atory":2739,"Ġfav":2740,"ĠSl":2741,"ray":2742,"Ġnetwork":2743,"Ġprivate":2744,"ĠJew":2745,"Ġstri":2746,"ĠVir":2747,"inese":2748,"aching":2749,"Ġliter":2750,"tr":2751,"go":2752,"ĠGroup":2753,"ĠWashington":2754,"ression":2755,"ĠJe":2756,"osition":2757,"omm":2758,"ĠAngel":2759,"Ġinterest":2760,"Ġawarded":2761,"Ġbetter":2762,"ĠOther":2763,"ĠBay":2764,"berg":2765,"Ġter":2766,"Ġfr":2767,"Âłm":2768,"Ġperformance":2769,"Ġstage":2770,"Ġconduct":2771,"Ġhealth":2772,"ĠProv":2773,"Ġprovided":2774,"oke":2775,"Ġsubsequ":2776,"Ġwanted":2777,"Ġdi":2778,"ĠMad":2779,"Ġreplaced":2780,"ĠCong":2781,"aries":2782,"ĠLaw":2783,"Ġalready":2784,"Ġsubject":2785,"Ġcourt":2786,"ĠThat":2787,"Ġmem":2788,"ĠCath":2789,"merc":2790,"incip":2791,"Ġcountries":2792,"Ġcapt":2793,"ĠDon":2794,"Ġtreat":2795,"ĠInstitute":2796,"ĠSim":2797,"iction":2798,"ĠChristian":2799,"Ġplaced":2800,"Ġoutside":2801,"Ġste":2802,"Ġrather":2803,"Ġplant":2804,"Ġstre":2805,"back":2806,"ids":2807,"Ġstated":2808,"Ġrange":2809,"Ġrespect":2810,"Ġlik":2811,"ĠWestern":2812,"Ġcand":2813,"Ġtold":2814,"Ġtou":2815,"Ġcop":2816,"Ġdecl":2817,"aring":2818,"Ġwall":2819,"Ġinj":2820,"Ġpay":2821,"Ġquick":2822,"Ġpolice":2823,"Ġlo":2824,"Ġaud":2825,"Ġap":2826,"iled":2827,"arian":2828,"Ġgun":2829,"ida":2830,"ĠThomas":2831,"hood":2832,"Ġill":2833,"Ġmodel":2834,"Ġstep":2835,"Ġmight":2836,"ĠTur":2837,"pec":2838,"Ġtransfer":2839,"sw":2840,"ĠMiss":2841,"Ġcollege":2842,"Ġtaking":2843,"Ġdeal":2844,"Ġstates":2845,"Ġparent":2846,"overnor":2847,"Ġvalue":2848,"Ġpossible":2849,"ĠRobert":2850,"Ġenough":2851,"Ġlooked":2852,"Ġcut":2853,"icy":2854,"unk":2855,"band":2856,"Ġachie":2857,"Ġ1998":2858,"ani":2859,"atives":2860,"Ġcentral":2861,"ĠSociety":2862,"board":2863,"ĠMr":2864,"Ġapprox":2865,"Ġgive":2866,"Ġ1960":2867,"Ġcivil":2868,"Ġarchitect":2869,"erc":2870,"ĠTV":2871,"Ġoccur":2872,"Ġarg":2873,"icated":2874,"uture":2875,"Ġcreat":2876,"ned":2877,"Ġpot":2878,"Ġinstead":2879,"Ġcat":2880,"Ġfif":2881,"Ġcompetition":2882,"Ġfelt":2883,"arily":2884,"ĠIr":2885,"Ġbooks":2886,"Ġnovel":2887,"ĠRussian":2888,"ĠCanadian":2889,"Ġconv":2890,"anced":2891,"ĠMark":2892,"Ġ185":2893,"ĠCharles":2894,"In":2895,"Ġloss":2896,"ĠâĢĶ":2897,"Ġshows":2898,"Ġconstit":2899,"Ġcenter":2900,"Ġsize":2901,"Ġbig":2902,"ĠTex":2903,"ĠMinister":2904,"Ġdegree":2905,"Ġdoor":2906,"ĠJapanese":2907,"ala":2908,"ĠServ":2909,"aled":2910,"Ġver":2911,"Ġfourth":2912,"Ġalways":2913,"ĠAfrican":2914,"face":2915,"Ġsem":2916,"ĠMusic":2917,"ĠChinese":2918,"rup":2919,"Ġtalk":2920,"Ġsex":2921,"Ġviol":2922,"Ġtowards":2923,"ĠGreat":2924,"ĠLat":2925,"ĠCommun":2926,"Ġtro":2927,"Ġcapital":2928,"Ġ184":2929,"eg":2930,"Ġbur":2931,"Ġspace":2932,"ĠScott":2933,"ĠAcademy":2934,"Ġobs":2935,"vironment":2936,"Ġcourse":2937,"Ġprovide":2938,"Ġreb":2939,"ĠCam":2940,"ĠGrand":2941,"ĠLouis":2942,"aught":2943,"ĠBo":2944,"ises":2945,"ctor":2946,"ĠItalian":2947,"Ġwa":2948,"Ġbi":2949,"unt":2950,"Ġforce":2951,"atre":2952,"Ġchanged":2953,"Ġ1996":2954,"Ġesc":2955,"Ġreve":2956,"ĠVict":2957,"Ġbar":2958,"Ġbreak":2959,"bed":2960,"Ġhom":2961,"Ġgold":2962,"odes":2963,"Ġarm":2964,"Ġfamilies":2965,"idae":2966,"ĠSk":2967,"apt":2968,"Ġintroduced":2969,"ĠDemocr":2970,"imate":2971,"Ġriver":2972,"urity":2973,"ĠSal":2974,"Ġobject":2975,"ows":2976,"ĠMac":2977,"ĠÃ":2978,"Ġmoney":2979,"ena":2980,"Ġ40":2981,"annel":2982,"olf":2983,"ving":2984,"Ġ1997":2985,"Ġtype":2986,"pecially":2987,"ĠSing":2988,"erve":2989,"ĠWhite":2990,"Ġmeas":2991,"Ġfemale":2992,"ĠMet":2993,"elled":2994,"Ġmass":2995,"Ġdraw":2996,"Ġclosed":2997,"Ġfarm":2998,"Ġmix":2999,"Ġcritic":3000,"Ġwhose":3001,"Ġsen":3002,"Ġkey":3003,"Ġaircraft":3004,"Ġrelationship":3005,"Ġartic":3006,"ĠSpanish":3007,"iation":3008,"199":3009,"ĠJust":3010,"Ġmove":3011,"Ġ31":3012,"Ġpurch":3013,"Ġcompan":3014,"ys":3015,"Ġwood":3016,"Ġaccount":3017,"ume":3018,"Ġjud":3019,"Ġstay":3020,"mercial":3021,"Ġrights":3022,"ishop":3023,"Ġran":3024,"Ġparts":3025,"Ġscored":3026,"Ġcontribut":3027,"Ġattended":3028,"oo":3029,"Ġplann":3030,"ĠRad":3031,"Ġcertain":3032,"not":3033,"Ġitself":3034,"Ġmethod":3035,"Ġfood":3036,"ples":3037,"Ġboy":3038,"irm":3039,"ĠAfrica":3040,"lier":3041,"oring":3042,"mon":3043,"oved":3044,"aval":3045,"Ġneigh":3046,"rael":3047,"ĠMichael":3048,"ĠFrank":3049,"Ġinstit":3050,"Ġprob":3051,"hi":3052,"Ġoccup":3053,"like":3054,"uz":3055,"ĠGreen":3056,"Ġhands":3057,"Ġmom":3058,"ĠEar":3059,"ĠCons":3060,"Ġspent":3061,"Ġallowed":3062,"option":3063,"Ġbroadcast":3064,"ĠPenn":3065,"Ġball":3066,"uter":3067,"ĠGold":3068,"Ġpred":3069,"Ġder":3070,"unn":3071,"shire":3072,"Ġcy":3073,"Ġhor":3074,"ĠTom":3075,"Ġcandid":3076,"ĠDan":3077,"rd":3078,"Ġopt":3079,"gy":3080,"Ġcensus":3081,"ecess":3082,"ĠHam":3083,"ĠWil":3084,"istry":3085,"road":3086,"mar":3087,"ĠMost":3088,"iqu":3089,"Ġnorthern":3090,"order":3091,"Ġprem":3092,"Ġneg":3093,"Ġaction":3094,"ĠLake":3095,"Ġbeginning":3096,"\"),":3097,"Ġfrequ":3098,"ka":3099,"Ġstudio":3100,"reland":3101,"irth":3102,"Ġcommand":3103,"Ġregard":3104,"ĠTwo":3105,"Ġ1995":3106,"eph":3107,"ires":3108,"Ġstar":3109,"Ġgrand":3110,"Ġheart":3111,"Ġdone":3112,"osing":3113,"Ġconcern":3114,"ĠHenry":3115,"ounter":3116,"asc":3117,"Ġended":3118,"Ġsection":3119,"Äģ":3120,"Ġfilms":3121,"Ġmeans":3122,"Ġdata":3123,"Ġactive":3124,"Ġking":3125,"Ġsus":3126,"Ġapproximately":3127,"Ġtax":3128,"Ġvia":3129,"oviet":3130,"Ġespecially":3131,"Ġtravel":3132,"Ġlisted":3133,"Ġpers":3134,"Ġdeterm":3135,"Ġdeep":3136,"Ġsouthern":3137,"ria":3138,"Ġwriting":3139,"Ġ1994":3140,"Ġvoice":3141,"Ġ1992":3142,"Ġclear":3143,"ĠFollow":3144,"Ġlower":3145,"Ġbuildings":3146,"ician":3147,"Ġexcept":3148,"ography":3149,"ufact":3150,"ĠPet":3151,"Ġmovement":3152,"ĠVirgin":3153,"Ġexc":3154,"Ġbelow":3155,"Ġisland":3156,"aine":3157,"Ġcal":3158,"ĠParis":3159,"lim":3160,"ĠFilm":3161,"Ġdark":3162,"Ġwinning":3163,"Ġmaintain":3164,"mb":3165,"yr":3166,"Ġunits":3167,"Ġrunning":3168,"ona":3169,"Ġself":3170,"ĠPeter":3171,"\">":3172,"ĠVictor":3173,"Ġdivision":3174,"inner":3175,"Ġruns":3176,"oid":3177,"idents":3178,"Ġpreviously":3179,"cy":3180,"ites":3181,"ĠMont":3182,"Ġdefeated":3183,"</":3184,"Ġdestroy":3185,"Ġlength":3186,"ĠTor":3187,"Ġexhib":3188,"ĠKingdom":3189,"nown":3190,"Ġsummer":3191,"Ġanc":3192,"Ġcoast":3193,"edy":3194,"Ġchart":3195,"ĠFollowing":3196,"ĠCatholic":3197,"ibrary":3198,"Ġorganization":3199,"lam":3200,"Ġimm":3201,"Ġchampionship":3202,"Ġblock":3203,"oint":3204,"ĠHill":3205,"ĠMat":3206,"Ġindustry":3207,"omp":3208,"Ġwhom":3209,"Ġbattle":3210,"irt":3211,"het":3212,"Ġfuture":3213,"Ġseat":3214,"abit":3215,"embly":3216,"25":3217,"Ġsn":3218,"olk":3219,"ending":3220,"Ġmedia":3221,"alled":3222,"Ġnatural":3223,"ĠCamp":3224,"och":3225,"II":3226,"ĠTexas":3227,"arch":3228,"?\"":3229,"rel":3230,"ĠSmith":3231,"ĠIsrael":3232,"Ġinvestig":3233,"Ġowned":3234,"Ġfocus":3235,"Ġmur":3236,"clus":3237,"istan":3238,"ift":3239,"ym":3240,"Ġsurround":3241,"ĠDirect":3242,"Ġsch":3243,"ĠCommission":3244,"Ġrepresented":3245,"uty":3246,"Ġsett":3247,"Ġsaf":3248,"Ġplays":3249,"oper":3250,"agon":3251,"Ġcred":3252,"inent":3253,"ux":3254,"ension":3255,"ĠIm":3256,"ĠMuseum":3257,"ector":3258,"Ġhigher":3259,"ficult":3260,"duction":3261,"Ġearlier":3262,"fit":3263,"Ġsometimes":3264,"Ġprincip":3265,"ĠFootball":3266,"Ġtournament":3267,"Ġrequired":3268,"ĠMel":3269,"Ġfunction":3270,"ips":3271,"ĠSecond":3272,"Ġaccording":3273,"Ġentered":3274,"Ġhot":3275,"Ġconstruct":3276,"Ġdocument":3277,"Ġsoft":3278,"Ġnomin":3279,"Ġarmy":3280,"based":3281,"ĠKore":3282,"Ġminutes":3283,"Ġpersonal":3284,"Ġhus":3285,"ĠApp":3286,"Ġlived":3287,"ĠArch":3288,"ada":3289,"rial":3290,"Ġprison":3291,"Ġsystems":3292,"Ġexam":3293,"ĠFin":3294,"retary":3295,"ĠDo":3296,"ĠSoviet":3297,"ĠRichard":3298,"Ġword":3299,"Ġjob":3300,"ylv":3301,"Âłkm":3302,"Ġeas":3303,"Ġdifficult":3304,"Ġpiec":3305,"Ġleave":3306,"Ġ1993":3307,"lebr":3308,"Ġwide":3309,"Ġkind":3310,"ĠBen":3311,"asket":3312,"Ġprimary":3313,"ĠMany":3314,"Ġ1991":3315,"Ġolder":3316,"ano":3317,"ini":3318,"Ġartist":3319,"Ġcommercial":3320,"Ġdro":3321,"Ġpassed":3322,"ortun":3323,"ĠDay":3324,"Ġleader":3325,"Ġnoted":3326,"Ġstructure":3327,"ĠSo":3328,"ground":3329,"Ġtransl":3330,"It":3331,"Ġjournal":3332,"Ġcomplex":3333,"ibility":3334,"Ġimmedi":3335,"Ġthings":3336,"porary":3337,"iences":3338,"asion":3339,"Ġteac":3340,"ĠSwed":3341,"Ġtraditional":3342,"urt":3343,"ĠChic":3344,"Ġbene":3345,"ios":3346,"ita":3347,"Ġproperty":3348,"ĠCommittee":3349,"ĠSant":3350,"Ġgenerally":3351,"Ġopening":3352,"SA":3353,"umn":3354,"lement":3355,"Ġ\"\"":3356,"Ġhighest":3357,"Ġlonger":3358,"rol":3359,"Ġhours":3360,"ĠCarol":3361,"Ġtoday":3362,"heast":3363,"ĠTrans":3364,"ĠIreland":3365,"ĠGovernment":3366,"Ġknew":3367,"ĠYear":3368,"ĠInter":3369,"Ġfinanc":3370,"Ġthus":3371,"Ġplat":3372,"orpor":3373,"ĠLos":3374,"Ġindependent":3375,"uke":3376,"Ġstudied":3377,"ĠRev":3378,"roll":3379,"Ġfinally":3380,"Ġabs":3381,"ĠBest":3382,"Ġ1950":3383,"Ġstandard":3384,"Ġintern":3385,"ĠCr":3386,"ĠRock":3387,"Ġmanufact":3388,"inct":3389,"Ġwords":3390,"Ġroute":3391,"Ġmultip":3392,"ĠKh":3393,"ĠZeal":3394,"Ġshot":3395,"Ġdate":3396,"Ġmagazine":3397,"ĠRecords":3398,"ĠÂ":3399,"Ġ#":3400,"ify":3401,"ĠFore":3402,"lying":3403,"Ġoperations":3404,"Ġpick":3405,"Ġstudies":3406,"Ġlack":3407,"Ġpractice":3408,"orial":3409,"Ġstudent":3410,"Ġcounty":3411,"Ġinside":3412,"lant":3413,"Ġden":3414,"ĠRob":3415,"Ġcollection":3416,"Ġanaly":3417,"Ġrailway":3418,"ping":3419,"ĠZealand":3420,"erry":3421,"Ġhap":3422,"Ġsettle":3423,"ĠDel":3424,"ĠFlor":3425,"sych":3426,"Ġhusband":3427,"ĠCongress":3428,"ota":3429,"known":3430,"itar":3431,"40":3432,"ĠBoard":3433,"room":3434,"Ġstaff":3435,"Ġanti":3436,"Ġchair":3437,"Ġnumerous":3438,"ĠCont":3439,"la":3440,"Ġincome":3441,"Ġmind":3442,"Ġthreat":3443,"NA":3444,"ĠFestival":3445,"Ġlay":3446,"60":3447,"Ġdram":3448,"Ġcontains":3449,"Ġleaving":3450,"arriage":3451,"Ġbring":3452,"Ġraised":3453,"Ġforced":3454,"well":3455,"ended":3456,"Ġcompanies":3457,"adium":3458,"Ġappearance":3459,"Ġnewsp":3460,"enty":3461,"Ġdisp":3462,"ees":3463,"Ġemer":3464,"ault":3465,"Ġrelated":3466,"cher":3467,"\").":3468,"Ġapplic":3469,"Ġpurp":3470,"Ġlaunched":3471,"Ġlocation":3472,"erved":3473,"ĠGre":3474,"selves":3475,"ustom":3476,"ĠMa":3477,"Ġissues":3478,"gen":3479,"Ġreally":3480,"rief":3481,"ĠCast":3482,"ĠGreek":3483,"Ġcaused":3484,"izing":3485,"ĠBur":3486,"Ġbecoming":3487,"utch":3488,"Ġquickly":3489,"onn":3490,"Ġlink":3491,"Ġge":3492,"Ġtransport":3493,"ĠSir":3494,"Ġterrit":3495,"ado":3496,"Ġincreased":3497,"Ġslow":3498,"Ġcommission":3499,"Ġpercent":3500,"Ġ1989":3501,"Ġprior":3502,"Ġcomplete":3503,"mitted":3504,"za":3505,"ĠBu":3506,"Ġthemselves":3507,"mark":3508,"Ġyet":3509,"âĢ¦":3510,"Ġdecision":3511,"ĠPac":3512,"Ġparents":3513,"hester":3514,"ĠPlay":3515,"ĠNavy":3516,"ĠAngeles":3517,"Ġnews":3518,"isk":3519,"venue":3520,"ĠEv":3521,"Ġfamous":3522,"ĠEduc":3523,"Ġmission":3524,"ĠForce":3525,"ĠArts":3526,"use":3527,"Ġterms":3528,"Ġsea":3529,"Ġvoc":3530,"ĠHow":3531,"pped":3532,"ura":3533,"ether":3534,"oe":3535,"Ġfle":3536,"ĠBrown":3537,"Ġidea":3538,"ĠChicago":3539,"eds":3540,"Ġer":3541,"Ġvehic":3542,"Ġenvironment":3543,"ulated":3544,"Ġcelebr":3545,"Ġscient":3546,"Ġwestern":3547,"ĠLater":3548,"ĠLord":3549,"Ġnorm":3550,"Ġneeded":3551,"Ġdig":3552,"ĠItaly":3553,"Ġsister":3554,"Ġhappen":3555,"Ġinsp":3556,"Ġforest":3557,"Ġtrain":3558,"Ġdiscuss":3559,"Ġweeks":3560,"Ġsuper":3561,"Ġobtain":3562,"action":3563,"ams":3564,"ĠMil":3565,"uments":3566,"itiz":3567,"ĠMexico":3568,"Ġattend":3569,"Ġ1988":3570,"ribution":3571,"Ġmeeting":3572,"Ġsenior":3573,"ĠScot":3574,"orning":3575,"Ġmajority":3576,"Ġvictory":3577,"Ġcharacters":3578,"Ġens":3579,"ola":3580,"80":3581,"Ġscore":3582,"ĠFound":3583,"Ġblood":3584,"ĠTheir":3585,"ĠCarl":3586,"Ġhelped":3587,"Ġselected":3588,"ĠLit":3589,"ylvania":3590,"inary":3591,"een":3592,"den":3593,"igan":3594,"Ã¢":3595,"ĠBet":3596,"Ġwhole":3597,"Ġgoals":3598,"ĠSaint":3599,"Ġassociated":3600,"Ġannual":3601,"ĠGo":3602,"Ġtakes":3603,"Ġunit":3604,"Ġadditional":3605,"Ġcreate":3606,"ĠHistor":3607,"Ġminor":3608,"ĠParliament":3609,"reme":3610,"Ġconsider":3611,"Ġbox":3612,"lor":3613,"illed":3614,"TV":3615,"ails":3616,"Ġschol":3617,"Ã¤":3618,"Ġmusical":3619,"Ġmostly":3620,"bers":3621,"Ġfeature":3622,"Ġpen":3623,"anks":3624,"Ġgrant":3625,"Ġmatches":3626,"Ġoffered":3627,"bl":3628,"Ġconcept":3629,"ĠArab":3630,"Ġdead":3631,"Ġet":3632,"Ġcentre":3633,"Ġequip":3634,"ĠOl":3635,"Ġmiddle":3636,"Ġamount":3637,"ils":3638,"Ġmanager":3639,"Ġenergy":3640,"standing":3641,"ĠGeorg":3642,"sis":3643,"Ġmention":3644,"Ġinterview":3645,"Ġfloor":3646,"Ġsinger":3647,"Ġremains":3648,"Ġfriends":3649,"Ġreason":3650,"ograph":3651,"inet":3652,"Ġretired":3653,"Ġartists":3654,"ĠSuper":3655,"Ġwriter":3656,"right":3657,"oses":3658,"Ġ183":3659,"Ġactivities":3660,"asketball":3661,"Ġprograms":3662,"Ġtrade":3663,"oma":3664,"Ġtried":3665,"lit":3666,"Ġevidence":3667,"echan":3668,"writ":3669,"Ġchanges":3670,"Ġlimited":3671,"Ġpul":3672,"Ġcanc":3673,"ĠRo":3674,"uge":3675,"Ġtable":3676,"Ġparticularly":3677,"vert":3678,"Ġlines":3679,"Ġtrib":3680,"Ġnames":3681,"Ġbelieved":3682,"Ar":3683,"ĠMass":3684,"anda":3685,"Ġlegal":3686,"ĠOld":3687,"Ġremain":3688,"ĠEmp":3689,"ĠVirginia":3690,"Ġshown":3691,"ication":3692,"ider":3693,"teen":3694,"Ġsum":3695,"ĠSqu":3696,"Ġsaying":3697,"Ġdom":3698,"Ġtext":3699,"oral":3700,"What":3701,"ingu":3702,"Ġmunicipality":3703,"cript":3704,"Ġattract":3705,"Ġbirth":3706,"Ġwasn":3707,"isions":3708,"Ġcarried":3709,"ricult":3710,"Ġgenus":3711,"FL":3712,"Ġlarger":3713,"Ġissue":3714,"house":3715,"Ġinn":3716,"Ġprevent":3717,"ero":3718,"Ġ1987":3719,"Ġvisit":3720,"Ġsupported":3721,"Ġant":3722,"Ġeconomic":3723,"Ġreligious":3724,"Ġinitially":3725,"Ġoperated":3726,"Ġscience":3727,"Ġquestion":3728,"ĠLiber":3729,"ĠOlympics":3730,"Ġnearly":3731,"Ġmakes":3732,"ĠAnn":3733,"Ġrap":3734,"change":3735,"Ġheavy":3736,"Ġsquad":3737,"Ġscreen":3738,"ems":3739,"Ġnine":3740,"wide":3741,"ĠMill":3742,"irit":3743,"Ġfailed":3744,"onse":3745,"Ġclaimed":3746,"Ġbound":3747,"ares":3748,"Ġbelong":3749,"sylvania":3750,"Ġofficer":3751,"Ġchief":3752,"undred":3753,"add":3754,"Ġ1986":3755,"Ġwat":3756,"down":3757,"21":3758,"Ġquarter":3759,"oud":3760,"Ġcompeted":3761,"ĠBraz":3762,"Ġserving":3763,"ronic":3764,"Ġmach":3765,"ĠUp":3766,"Ġded":3767,"Ġfeet":3768,"ĠSummer":3769,"Ġcorn":3770,"ĠEr":3771,"enth":3772,"iÄ":3773,"ĠWomen":3774,"ĠNorthern":3775,"We":3776,"Ġresults":3777,"Ġchall":3778,"ĠProvince":3779,"ĠLeg":3780,"ĠWales":3781,"Ġestablish":3782,"Ġexperience":3783,"Ġforward":3784,"ĠIrish":3785,"Ġmedical":3786,"ĠPennsylvania":3787,"Ġedition":3788,"aven":3789,"Ġang":3790,"ĠFlorida":3791,"Ġ1984":3792,"Ġcollabor":3793,"Ġbrief":3794,"ailed":3795,"Ġmanagement":3796,"ĠBill":3797,"Ġincrease":3798,"ĠChe":3799,"iring":3800,"Ġadop":3801,"Ġrate":3802,"Ġreferred":3803,"ĠValley":3804,"Ġpoet":3805,"fect":3806,"Ġuniversity":3807,"Ġsurface":3808,"Ġprobably":3809,"ried":3810,"ĠStr":3811,"ĠDespite":3812,"ĠAtlant":3813,"Ġconnect":3814,"Ġtell":3815,"aches":3816,"24":3817,"Ġarrived":3818,"ĠCD":3819,"Ġcoming":3820,"ously":3821,"23":3822,"ampion":3823,"ĠWood":3824,"Ġsays":3825,"Ġtow":3826,"Ġpresented":3827,"ports":3828,"ĠKn":3829,"Ġsubsequently":3830,"Ġmer":3831,"Ġinstr":3832,"Ġarrest":3833,"Ġculture":3834,"Ġple":3835,"ĠFort":3836,"ulf":3837,"ste":3838,"atively":3839,"Ġfort":3840,"Ġpoor":3841,"Ġearned":3842,"Ġ1985":3843,"Ġcases":3844,"va":3845,"ients":3846,"ĠProfess":3847,"Ġsports":3848,"ĠRussia":3849,"Ġguitar":3850,"Ġbad":3851,"ta":3852,"Americ":3853,"azz":3854,"ĠIran":3855,"ĠChief":3856,"Ġmanaged":3857,"ĠPre":3858,"Ġstarting":3859,"ervation":3860,"ĠBattle":3861,"erem":3862,"Ġaltern":3863,"unior":3864,"ĠOper":3865,"ockey":3866,"Ġremaining":3867,"Ġmoment":3868,"ĠBrazil":3869,"iance":3870,"inals":3871,"ĠMur":3872,"ĠOver":3873,"Ġfoot":3874,"ĠJoseph":3875,"Ġuses":3876,"Ġarms":3877,"Ġvariety":3878,"Ġop":3879,"Ġtroops":3880,"ĠSur":3881,"Ġsusp":3882,"ken":3883,"Ġeditor":3884,"Ġcomposed":3885,"Ġspecific":3886,"Ġtarg":3887,"ien":3888,"Ġforms":3889,"ĠOh":3890,"ican":3891,"ĠHot":3892,"Ġdemon":3893,"Ġindividuals":3894,"iy":3895,"odd":3896,"ĠEducation":3897,"ĠJim":3898,"ĠCat":3899,"Ġlif":3900,"Ġstatus":3901,"Ġpolicy":3902,"FA":3903,"ĠTechn":3904,"Ġindic":3905,"Ġfederal":3906,"ĠChap":3907,"Ġmovie":3908,"Ġforeign":3909,"bur":3910,"ĠUnder":3911,"Ġcarry":3912,"ols":3913,"Ġfinancial":3914,"abb":3915,"Ġmeaning":3916,"ĠDen":3917,"irection":3918,"ella":3919,"Ġcovered":3920,"Ġnation":3921,"Ġprovides":3922,"Ġbed":3923,"ĠColumb":3924,"Ġinte":3925,"Ġcustom":3926,"Ġtouch":3927,"Ġconsists":3928,"Ġphil":3929,"itation":3930,"ĠChampionships":3931,"ledge":3932,"Ġadj":3933,"arters":3934,"Ġcell":3935,"ĠBoth":3936,"Ġseparate":3937,"Ġeastern":3938,"ette":3939,"Ġhospital":3940,"Ġsle":3941,"Ġproblems":3942,"Al":3943,"Ġattention":3944,"70":3945,"An":3946,"ging":3947,"Ġappears":3948,"Ġnecess":3949,"ears":3950,"isation":3951,"ĠSar":3952,"ĠSouthern":3953,"bon":3954,"Ġsure":3955,"Ġlives":3956,"ao":3957,"Ġcrew":3958,"Ġmale":3959,"Ġplatform":3960,"inter":3961,"Ġmedal":3962,"part":3963,"utions":3964,"Ġrecent":3965,"iant":3966,"ĠMore":3967,"ĠPacific":3968,"Ġanything":3969,"imum":3970,"Ġlabel":3971,"ĠPublic":3972,"itude":3973,"light":3974,"ĠGames":3975,"22":3976,"Ġlog":3977,"Ġseasons":3978,"ua":3979,"ties":3980,"uing":3981,"ĠRos":3982,"Ġrequire":3983,"Ġresponse":3984,"Ġhouses":3985,"Ġ1983":3986,"Ġheard":3987,"Ġsomeone":3988,"Ġtheory":3989,"Ġmarriage":3990,"Ġoverall":3991,"Ġsource":3992,"ĠMartin":3993,"Ġsociety":3994,"BA":3995,"Ġcompos":3996,"ĠBus":3997,"Ġtemper":3998,"Ġalone":3999,"Ġbridge":4000,"ĠSpain":4001,"ĠService":4002,"Ġcolon":4003,"Ġsequ":4004,"Ġmainly":4005,"ĠHaw":4006,"ĠBank":4007,"illa":4008,"Ġregional":4009,"Ġstations":4010,"isco":4011,"ote":4012,"Ġlatter":4013,"aging":4014,"Ġarrang":4015,"Ġpaper":4016,"Ġcouncil":4017,"ĠClass":4018,"Ġpil":4019,"Ġ1982":4020,"aily":4021,"Ġtrying":4022,"mond":4023,"Ġshoot":4024,"put":4025,"Ġnearby":4026,"cer":4027,"Ġdepart":4028,"Ġcause":4029,"Ġlot":4030,"Ġlegisl":4031,"rast":4032,"ĠSun":4033,"Ġrecording":4034,"Ġlic":4035,"Ġkept":4036,"Ġdespite":4037,"Ġacquired":4038,"Ġ65":4039,"Ġwhether":4040,"Ġestim":4041,"urban":4042,"ĠMic":4043,"Ġwhy":4044,"Ġcharg":4045,"ĠThen":4046,"Ġfirm":4047,"Ġsquare":4048,"Ġsucceed":4049,"Ġplans":4050,"obal":4051,"Ġdirectly":4052,"bury":4053,"ustr":4054,"Ġbomb":4055,"etic":4056,"ky":4057,"ĠSil":4058,"ĠQueen":4059,"ĠAnother":4060,"Ġtracks":4061,"ĠWork":4062,"Ġnothing":4063,"ĠJewish":4064,"ucle":4065,"ession":4066,"arden":4067,"gl":4068,"Ġchap":4069,"Ġ1930":4070,"ĠLuc":4071,"ato":4072,"Ġmoving":4073,"Ġresponsible":4074,"Ġproposed":4075,"Ġ1940":4076,"umed":4077,"Ġgraduated":4078,"ining":4079,"Ġinfluence":4080,"ca":4081,"Ġhop":4082,"ĠAssembly":4083,"Ġlooking":4084,"Ġspread":4085,"Ġtechnology":4086,"Ġpath":4087,"ĠOut":4088,"Ġdiss":4089,"Ġlikely":4090,"ario":4091,"Ġ60":4092,"imb":4093,"Ġpartn":4094,"ĠBoy":4095,"Ġdepartment":4096,"more":4097,"Ġnative":4098,"Ġships":4099,"ĠLand":4100,"Ġprotect":4101,"Ġwor":4102,"ĠBritain":4103,"iger":4104,"Ġ1972":4105,"Ġ1979":4106,"ĠAwards":4107,"ipl":4108,"ĠFred":4109,"Ġdiscovered":4110,"Ġhair":4111,"Ġnature":4112,"ban":4113,"uries":4114,"iana":4115,"uman":4116,"Ġmultiple":4117,"ĠMcC":4118,"Ġserve":4119,"Ġgrew":4120,"Ġwebs":4121,"Ġcitiz":4122,"Ġactually":4123,"ĠBook":4124,"Ġdoing":4125,"Ġansw":4126,"vention":4127,"ables":4128,"Ġimmediately":4129,"ĠDirector":4130,"Ġfell":4131,"itt":4132,"Ġ1945":4133,"stant":4134,"ensity":4135,"ĠPoland":4136,"ĠTimes":4137,"Ġ=":4138,"mission":4139,"ĠPak":4140,"198":4141,"bre":4142,"ĠMod":4143,"ully":4144,"ĠSub":4145,"Ġcomment":4146,"Ġoperation":4147,"ĠTw":4148,"imin":4149,"lection":4150,"ĠScience":4151,"Ġproblem":4152,"Ġdu":4153,"Ġhall":4154,"Ġvote":4155,"Ġpeak":4156,"Ġweap":4157,"Ġi":4158,"kr":4159,"ĠSpr":4160,"Ġshare":4161,"Ġincreasing":4162,"Ġcateg":4163,"Ġacadem":4164,"Ġspeed":4165,"ĠSa":4166,"ĠRailway":4167,"Ġhundred":4168,"Ġherself":4169,"Ġconditions":4170,"Ġpromoted":4171,"Ġemb":4172,"ĠJud":4173,"ĠEmpire":4174,"ĠAre":4175,"27":4176,"Ġpow":4177,"ĠPan":4178,"andon":4179,"Ġcontinue":4180,"Ġorganiz":4181,"Ġfellow":4182,"ĠIll":4183,"Ġcities":4184,"Ġgas":4185,"cend":4186,"Ġeth":4187,"Ġ1976":4188,"ĠGovernor":4189,"Ġconstructed":4190,"itan":4191,");":4192,"Ġhistorical":4193,"Ġ1974":4194,"26":4195,"Ġdirection":4196,"ĠOf":4197,"ati":4198,"Ġtoward":4199,"Ġcomes":4200,"Ġpasseng":4201,"Ġextended":4202,"Ġ1981":4203,"Ġsens":4204,"ĠBig":4205,"aped":4206,"Ġgiving":4207,"ĠInc":4208,"Ã¨":4209,"ĠDemocratic":4210,"Ã³n":4211,"Ġmess":4212,"emporary":4213,"ali":4214,"Sh":4215,"Ġlies":4216,"Ġmechan":4217,"Ġpsych":4218,"Ġproducts":4219,"Ġsched":4220,"vement":4221,"ersey":4222,"Ġrecords":4223,"itted":4224,"Ġ1968":4225,"Ġthing":4226,"ental":4227,"Ġmaster":4228,"Ġlevels":4229,"joy":4230,"ĠFre":4231,"ĠHel":4232,"Ġmorning":4233,"ĠDutch":4234,"28":4235,"isted":4236,"Ġdomin":4237,"oir":4238,"peror":4239,"col":4240,"Ġspeak":4241,"Ġdisplay":4242,"Ġfifth":4243,"ĠMos":4244,"Ġstreet":4245,"ĠSpec":4246,"Ġdrug":4247,"Ġhonor":4248,"ss":4249,"Ġoil":4250,"ĠRadio":4251,"Ġstood":4252,"Ġthr":4253,"Ġalleg":4254,"Ġnumbers":4255,"ĠResearch":4256,"Ġess":4257,"Ġcapac":4258,"Ġ1978":4259,"Ġunivers":4260,"ĠJul":4261,"Ġhouseholds":4262,"Ġfemales":4263,"ĠMer":4264,"Ġ1920":4265,"Ġproducer":4266,"ĠÂ£":4267,"ador":4268,"Ġdouble":4269,"aded":4270,"Ġ1975":4271,"lo":4272,"raf":4273,"ĠArg":4274,"inger":4275,"Ġinh":4276,"Ġissued":4277,"Ġincorpor":4278,"unction":4279,"Ġtrue":4280,"ĠStep":4281,"ĠGar":4282,"Ġelements":4283,"ĠDef":4284,"ĠHa":4285,"chest":4286,"ĠVol":4287,"No":4288,"Ġreach":4289,"ĠProg":4290,"ĠCur":4291,"29":4292,"This":4293,"Ġscene":4294,"Ġsal":4295,"Ġgreen":4296,"ĠEarth":4297,"ĠEastern":4298,"ĠConference":4299,"ĠAlso":4300,"ĠTour":4301,"Ġcouple":4302,"ĠLatin":4303,"Ġdise":4304,"Ġprimarily":4305,"RA":4306,"Ġopportun":4307,"Ġmerg":4308,"ĠBow":4309,"ny":4310,"arrow":4311,"iced":4312,"Ġsoldiers":4313,"Ġcultural":4314,"rid":4315,"Ġcontact":4316,"Ġborder":4317,"Ġaim":4318,"Ġyouth":4319,"Ġtransferred":4320,"ĠEdward":4321,"ĠLee":4322,"antry":4323,"Ġsupp":4324,"Ġneighbor":4325,"Åį":4326,"Ġordered":4327,"Ġstories":4328,"ĠCarolina":4329,"ĠBre":4330,"oston":4331,"gian":4332,"ĠMiddle":4333,"Ġresidents":4334,"Ġwatch":4335,"Ġgre":4336,"ĠCle":4337,"ĠBob":4338,"Ġappearances":4339,"Ġ180":4340,"ĠCharl":4341,"gypt":4342,"ecause":4343,"ias":4344,"resp":4345,"Ġancient":4346,"Ġcounter":4347,"ĠPeople":4348,"Ġ1973":4349,"wan":4350,"Ġnewspaper":4351,"Ġfast":4352,"ĠMah":4353,"met":4354,"Ġmedian":4355,"enant":4356,"Ġelections":4357,"Ġcolor":4358,"Ġrevealed":4359,"Ġdemonstr":4360,"ĠLine":4361,"ounds":4362,"Ġplaces":4363,"ening":4364,"Ġpack":4365,"Ġ1977":4366,"bridge":4367,"ki":4368,"ightly":4369,"Ġstreng":4370,"iÄĩ":4371,"Ġremoved":4372,"Ġhighly":4373,"ender":4374,"poration":4375,"Ġstars":4376,"Ġsecurity":4377,"Ġagreed":4378,"Ġult":4379,"He":4380,"ĠSol":4381,"Ġamb":4382,"Ġ45":4383,"hol":4384,"Ġpra":4385,"ĠWhat":4386,"Ġprofessor":4387,"ĠTer":4388,"ushed":4389,"ĠDou":4390,"Ġsmaller":4391,"ĠSat":4392,"Ġautom":4393,"ĠAv":4394,"Le":4395,"Ġpan":4396,"fully":4397,"wa":4398,"Ġpolitician":4399,"Ġletter":4400,"Ġinitial":4401,"nam":4402,"CC":4403,"Ġappl":4404,"Ġbelieve":4405,"Ġ1971":4406,"Ġproduce":4407,"Ġblue":4408,"ĠIII":4409,"ĠScotland":4410,"Ġchem":4411,"ĠSund":4412,"Ġserious":4413,"agn":4414,"ĠSocial":4415,"ĠCro":4416,"Ġintended":4417,"Ġconver":4418,"ety":4419,"ĠIslam":4420,"Ġstone":4421,"ĠLong":4422,"ora":4423,"ĠBas":4424,"Ġpurs":4425,"icient":4426,"har":4427,"Ġ1969":4428,"Ġparticipated":4429,"ĠPrince":4430,"Ġmuseum":4431,"Ġcomputer":4432,"ga":4433,"ĠTri":4434,"war":4435,"Ġrepe":4436,"ĠCreek":4437,"raight":4438,"yan":4439,"Ġprovince":4440,"ellig":4441,"Ġbit":4442,"American":4443,"Ġenem":4444,"!âĢĿ":4445,"Ġonto":4446,"Ġfavor":4447,"Ġplanned":4448,"Ġ35":4449,"Ġcomplet":4450,"Ġdistance":4451,"Ġdoub":4452,"ĠPortug":4453,"Ġraces":4454,"ĠYoung":4455,"astic":4456,"ĠEll":4457,"enes":4458,"ĠTheatre":4459,"ressive":4460,"ĠEgypt":4461,"ulations":4462,"ĠWal":4463,"rugg":4464,"Ġnotable":4465,"Ġfollows":4466,"Ġofficially":4467,"Ġactor":4468,"AS":4469,"Ġstore":4470,"yard":4471,"Ġofficers":4472,"ĠMu":4473,"abeth":4474,"Ġrule":4475,"Ġheadqu":4476,"iated":4477,"istics":4478,"mir":4479,"Ġbeaut":4480,"Ġ1967":4481,"onic":4482,"bour":4483,"amily":4484,"Ġadministrative":4485,"Ġprojects":4486,"Ġbasis":4487,"Ġmiles":4488,"no":4489,"Ġdivided":4490,"ĠCivil":4491,"Ġenjoy":4492,"ĠDev":4493,"gar":4494,"Ġparish":4495,"ĠConn":4496,"Ġprominent":4497,"ugby":4498,"cel":4499,"ansion":4500,"ye":4501,"ĠJones":4502,"Ġability":4503,"Ġuns":4504,"isher":4505,"osop":4506,"Ġmeant":4507,"ĠFoundation":4508,"Ġfigure":4509,"ĠGall":4510,"uan":4511,"isters":4512,"Ġpict":4513,"Ġmetal":4514,"Ġpremi":4515,"ĠEach":4516,"ĠMajor":4517,"Ġgrowth":4518,"Ġbird":4519,"Ġmatter":4520,"Ġtraff":4521,"ications":4522,"ĠJac":4523,"90":4524,"entr":4525,"Ġstrateg":4526,"ĠWilliams":4527,"Ġroll":4528,"Ġphysical":4529,"Ġut":4530,"ĠCoast":4531,"Ġbeat":4532,"ĠBoston":4533,"Ġpal":4534,"ansas":4535,"Ġcandidate":4536,"ĠBefore":4537,"itled":4538,"Ġpotential":4539,"Ġhapp":4540,"Ġrecover":4541,"class":4542,"BS":4543,"Ġcouldn":4544,"ĠBroad":4545,"orship":4546,"197":4547,"Ġbasketball":4548,"aph":4549,"ĠElect":4550,"iano":4551,"Ġexpected":4552,"Ġtwenty":4553,"Ġtry":4554,"Ġrecently":4555,"ancy":4556,"ieut":4557,"aved":4558,"Ġrenamed":4559,"Ġdestroyed":4560,"ĠOrder":4561,"Ġcampus":4562,"burgh":4563,"ĠFrancisco":4564,"Ġcard":4565,"oz":4566,"Ġrare":4567,"Ġprep":4568,"Ġpositive":4569,"awa":4570,"ĠDi":4571,"velopment":4572,"ĠSecretary":4573,"Ġath":4574,"Ġchannel":4575,"ĠSeries":4576,"Ġmouth":4577,"ĠGal":4578,"ĠInf":4579,"ĠBul":4580,"Ġconducted":4581,"Ġseek":4582,"Ġalongside":4583,"ĠKent":4584,"iro":4585,"apers":4586,"kin":4587,"ĠRam":4588,"Ġlaws":4589,"ĠMuslim":4590,"Ġsearch":4591,"ĠUkr":4592,"Ġ1964":4593,"ĠLab":4594,"Ġpurchased":4595,"Ġcaptain":4596,"ifying":4597,"Ġupper":4598,"ĠTy":4599,".)":4600,"ounded":4601,"cean":4602,"adel":4603,"ĠMem":4604,"ributed":4605,"Ġwebsite":4606,"ibly":4607,"Ġcompletely":4608,"dney":4609,"Ġpeace":4610,"Ġmountain":4611,"ĠHung":4612,"rance":4613,"Ġeffects":4614,"Ġefforts":4615,"ocated":4616,"ĠTeam":4617,"Ġcharge":4618,"Ġdefeat":4619,"ĠKe":4620,"ĠAdd":4621,"ources":4622,"35":4623,"Ġprec":4624,"Ġ/":4625,"izes":4626,"Ġgetting":4627,"Ġthous":4628,"aya":4629,"rad":4630,"Ġleaves":4631,"rie":4632,"ĠPrem":4633,"ĠBBC":4634,"Ġsimply":4635,"Ġdedicated":4636,"ĠPhilipp":4637,"ĠStation":4638,"ĠCentre":4639,"ĠMot":4640,"Ġspot":4641,"ĠFour":4642,"Ġdance":4643,"'m":4644,"Ġpresence":4645,"obile":4646,"ĠBC":4647,"sen":4648,"ĠNews":4649,"ĠJohnson":4650,"ĠMichigan":4651,"ĠRepublican":4652,"Ġstrugg":4653,"Ġcommonly":4654,"Ġcapacity":4655,"irmed":4656,"Ġbehav":4657,"Ġapproach":4658,"Ġimplement":4659,"Ġaccepted":4660,"Ġwear":4661,"Ġtypes":4662,"Ġhistoric":4663,"ĠHon":4664,"Ġsolo":4665,"rect":4666,"Ġactivity":4667,"Ġreflect":4668,"ĠAsian":4669,"Ġreform":4670,"ĠLy":4671,"Ġprin":4672,"Ġtend":4673,"Ġcannot":4674,"Ġtarget":4675,"ĠSenate":4676,"AA":4677,"cles":4678,"ĠStan":4679,"ĠAsia":4680,"ĠMax":4681,"ĠWind":4682,"Ġwithd":4683,"ĠMen":4684,"ĠOhio":4685,"stone":4686,"ĠSand":4687,"Ġenter":4688,"Ġoffers":4689,"Ġworkers":4690,"ĠSea":4691,"istered":4692,"aith":4693,"Ġimpact":4694,"Ġ1965":4695,"agement":4696,"ĠEliz":4697,"Ġsense":4698,"phy":4699,"Ġsend":4700,"Ġice":4701,"rich":4702,"Ġ1944":4703,"Ġtreatment":4704,"illy":4705,"45":4706,"ĠOpen":4707,"ading":4708,"Ġbow":4709,"resh":4710,"Ġarticle":4711,"Ġstraight":4712,"ela":4713,"Ġassigned":4714,"Ã§":4715,"hens":4716,"Ġshowed":4717,"Ġ1966":4718,"Ġgained":4719,"book":4720,"Ġpun":4721,"Ġsettlement":4722,"Ġrac":4723,"Ġhousing":4724,"Ġquality":4725,"ĠAvenue":4726,"Ġelev":4727,"Ġadult":4728,"set":4729,"ager":4730,"Ġprote":4731,"Ġir":4732,"Ġwidely":4733,"aka":4734,"ube":4735,"edom":4736,"anger":4737,"achel":4738,"ieutenant":4739,"Ġbranch":4740,"ĠAz":4741,"error":4742,"Ġknowledge":4743,"alog":4744,"ĠScottish":4745,"Ġfacilities":4746,"Ġmurder":4747,"Ġrat":4748,"Ġtherefore":4749,"alle":4750,"ĠTim":4751,"Ġsecret":4752,"Ġadopted":4753,"ĠHealth":4754,"dro":4755,"umber":4756,"ira":4757,"iser":4758,"ĠEngine":4759,"ĠColumbia":4760,"Ġwild":4761,"ĠPolish":4762,"oration":4763,"ĠCross":4764,"ĠBorn":4765,"encies":4766,"Ġdeclared":4767,"Ġcaptured":4768,"can":4769,"antly":4770,"orough":4771,"ĠSydney":4772,"Ġagricult":4773,"ption":4774,"ĠJackson":4775,"ĠHy":4776,"Ġserves":4777,"ja":4778,"ĠSystem":4779,"Ġfeaturing":4780,"Ġrecognized":4781,"ĠStar":4782,"ĠOx":4783,"Ġcoin":4784,"duce":4785,"Ġconcentr":4786,"Ġfix":4787,"ĠOffice":4788,"Ġonline":4789,"arp":4790,"Ġorganized":4791,"inem":4792,"Ġsilver":4793,"iling":4794,"Ġencour":4795,"Ġmentioned":4796,"Ġsymb":4797,"Ġestate":4798,"enge":4799,"ila":4800,"Ġwinner":4801,"bo":4802,"Ġmic":4803,"ishes":4804,"Ġoccurred":4805,"Ġpressure":4806,"osen":4807,"ĠPost":4808,"ÅĤ":4809,"ĠHu":4810,"Ġadministration":4811,"Ġsuffered":4812,"Ġlargely":4813,"gend":4814,"ĠTop":4815,"ĠCorps":4816,"greg":4817,"ĠVan":4818,"Ġequipment":4819,"ĠThree":4820,"ĠRay":4821,"Ġformat":4822,"pan":4823,"Ġelectric":4824,"mas":4825,"Ġperman":4826,"Ġdistinct":4827,"ez":4828,"Ġrural":4829,"Ġ80":4830,"Ġhol":4831,"Ġrout":4832,"Ġpaid":4833,"ĠMid":4834,"Ġnucle":4835,"ighter":4836,"Ġpit":4837,"ĠNow":4838,"Ġrespectively":4839,"gu":4840,"ĠTem":4841,"Ġassistant":4842,"ĠSever":4843,"Ġcontroll":4844,"Ġsplit":4845,"fort":4846,"Ġleaders":4847,"ĠAsh":4848,"Ġcars":4849,"Ġcontent":4850,"Ġsurpr":4851,"respond":4852,"Ġagreement":4853,"ĠWall":4854,"Ġtaught":4855,"Ġabandon":4856,"Ġsituation":4857,"Ġroles":4858,"Ġdropped":4859,"ricket":4860,"ĠGeorgia":4861,"itness":4862,"stein":4863,"itage":4864,"ĠKenn":4865,"ĠDis":4866,"Ġtypically":4867,"ras":4868,"Ġgrowing":4869,"ĠHarr":4870,"Ġoperating":4871,"Ġestimated":4872,"Ġcerem":4873,"Ġflight":4874,"ho":4875,"claim":4876,"Ġexecutive":4877,"Ġpet":4878,"Ġcompared":4879,"Ġeffort":4880,"Ġacademic":4881,"iga":4882,"Ġvari":4883,"Ġmill":4884,"win":4885,"Ġeverything":4886,"ĠShow":4887,"with":4888,"Ġspirit":4889,"Ġshop":4890,"Ġcombined":4891,"ima":4892,"Ġmax":4893,"haps":4894,"Ġdyn":4895,"ĠHead":4896,"ĠTam":4897,"Ġrules":4898,"ordin":4899,"aby":4900,"Ġpurpose":4901,"ederation":4902,"Ġintegr":4903,"Ġtells":4904,"ĠProt":4905,"ava":4906,"ko":4907,"ĠLu":4908,"ĠTre":4909,"Ġaccomp":4910,"iate":4911,"Ġclubs":4912,"Ġtwice":4913,"Ġacting":4914,"Ġcontinues":4915,"ĠBecause":4916,"onents":4917,"Ġsevent":4918,"Ġcam":4919,"arring":4920,"New":4921,"Ġowner":4922,"Ġglass":4923,"ĠEst":4924,"ects":4925,"Ġwr":4926,"ented":4927,"Ġterritory":4928,"ĠJes":4929,"Ġlanguages":4930,"Ġbecomes":4931,"ulpt":4932,"Ġsuit":4933,"Ġburn":4934,"etts":4935,"ĠBern":4936,"Ġsu":4937,"ĠBal":4938,"odies":4939,"ropical":4940,"rics":4941,"Ġpulled":4942,"ennis":4943,"ba":4944,"ĠProfessor":4945,"Ġsemi":4946,"Ġsources":4947,"rawn":4948,"Ġ(,":4949,"Ġcitizens":4950,"ĠViet":4951,"ĠÅ":4952,"usion":4953,"ĠFe":4954,"IS":4955,"rical":4956,"icted":4957,"pass":4958,"ourne":4959,"Ġtree":4960,"oted":4961,"Ġresulted":4962,"ione":4963,"Ġsuggested":4964,"Ġcommunities":4965,"Ġdrama":4966,"Ġinterp":4967,"Ġsales":4968,"ĠJersey":4969,"orter":4970,"Ġreviews":4971,"Ġscholars":4972,"hu":4973,"Ġmut":4974,"Ġmixed":4975,"ĠAlexander":4976,"Ġtitled":4977,"Ġburied":4978,"ĠHospital":4979,"miss":4980,"Ġalbums":4981,"ĠRome":4982,"Ġdamage":4983,"AC":4984,"olved":4985,"Ġheav":4986,"Ġquite":4987,"75":4988,"Ġbal":4989,"Ġgives":4990,"ses":4991,"Don":4992,"Ġ1942":4993,"Ġlosing":4994,"rog":4995,"aling":4996,"onto":4997,"lict":4998,"Ġ1963":4999,"Ġ1962":5000,"Ġconclud":5001,"ctions":5002,"Ġ!":5003,"Ġtask":5004,"yer":5005,"Ġtrust":5006,"ĠOtt":5007,"Ġremember":5008,"Ġcontrovers":5009,"Ġera":5010,"Ġteacher":5011,"Ġcondition":5012,"ĠAp":5013,"Ġgoes":5014,"Ġweight":5015,"bit":5016,"Ġgreater":5017,"Ġsurrounding":5018,"Ġfinish":5019,"Ġawards":5020,"amber":5021,"ker":5022,"ĠBrook":5023,"perial":5024,"Ġdensity":5025,"ĠLi":5026,"Ġnewly":5027,"ricts":5028,"Ġpositions":5029,"ĠVictoria":5030,"Ġholding":5031,"Ġmales":5032,"Ġstopped":5033,"Ġ1948":5034,"à¤":5035,"Ġconference":5036,"ĠWater":5037,"ĠCard":5038,"Ġindustrial":5039,"Ġepisodes":5040,"ĠFederal":5041,"ĠAlbert":5042,"Ġsingles":5043,"inois":5044,"ĠCy":5045,"ĠBerlin":5046,"Ġrisk":5047,"ĠAth":5048,"Ġ179":5049,"Ġlabor":5050,"Ġrecomm":5051,"ĠGood":5052,"ĠFC":5053,"Ġexpanded":5054,"tery":5055,"ĠArgent":5056,"ilding":5057,"ĠSong":5058,"achus":5059,"ĠOs":5060,"zy":5061,"ĠAndrew":5062,"Ġcab":5063,"inity":5064,"Ġnarrow":5065,"ĠElizabeth":5066,"ĠKong":5067,"ĠHistoric":5068,"Ġresident":5069,"ropol":5070,"iform":5071,"Ġsuppl":5072,"Ġhosted":5073,"icine":5074,"ĠCE":5075,"Ġ70":5076,"onia":5077,"Ġfully":5078,"Ġreduced":5079,"ĠCorporation":5080,"Ġreceive":5081,"which":5082,"ivity":5083,"Ġbroke":5084,"Ġpattern":5085,"Ġtrial":5086,"Ġretire":5087,"Ġwing":5088,"uted":5089,"Ġsettled":5090,"Ġly":5091,"Ġfighting":5092,"Ġdefin":5093,"Ġfootballer":5094,"Ġtrou":5095,"kins":5096,"Ġspring":5097,"Ġleadership":5098,"Ġidentified":5099,"Ġproviding":5100,"load":5101,"Ġplants":5102,"'d":5103,"Ġyards":5104,"500":5105,"ĠVer":5106,"Ġaddress":5107,"Ġparties":5108,"Ġmotor":5109,"chen":5110,"ĠField":5111,"Ġchampion":5112,"irty":5113,"ror":5114,"edd":5115,"ĠDaniel":5116,"ski":5117,"33":5118,"ĠAmong":5119,"ĠPrime":5120,"Ġrespond":5121,"onent":5122,"Ġ1941":5123,"ĠBlue":5124,"Ġcorrespond":5125,"Ġjoint":5126,"iful":5127,"Ġpaint":5128,"Ġcritical":5129,"Ã±":5130,"ĠMas":5131,"Ġcorner":5132,"ĠKen":5133,"mad":5134,"Ġstream":5135,"Ġspons":5136,"Ġaffili":5137,"udden":5138,"Ġvess":5139,"Ġgranted":5140,"ĠAri":5141,"oday":5142,"ĠCorn":5143,"Ġfair":5144,"acks":5145,"!\"":5146,"Ġsituated":5147,"ĠDevelopment":5148,"ĠIllinois":5149,"ĠBrig":5150,"Ġunion":5151,"Ġmodels":5152,"Ġdrive":5153,"ĠOlympic":5154,"Ġyounger":5155,"ĠJeff":5156,"thur":5157,"Ġmunicipal":5158,"Ġtitles":5159,"Ġunc":5160,"Ġ1946":5161,"unte":5162,"ĠBang":5163,"ĠRog":5164,"Ġearth":5165,"ĠHong":5166,"Ġseemed":5167,"ĠJr":5168,"ĠCaptain":5169,"ĠLove":5170,"omew":5171,"Ġcoal":5172,"196":5173,"Ġdog":5174,"Ġnominated":5175,"ĠUnivers":5176,"Ġunique":5177,"nes":5178,"Ġhorse":5179,"Å¡":5180,"ĠIslands":5181,"Ġconvers":5182,"ĠMinn":5183,"Ġresulting":5184,"Ġdigital":5185,"Ġsides":5186,"ĠTay":5187,"TA":5188,"Ġflag":5189,"yal":5190,"Ġ90":5191,"Ġbott":5192,"Ġ1943":5193,"Ġtrees":5194,"Ġsuggest":5195,"Ġorganizations":5196,"ĠBa":5197,"emet":5198,"bec":5199,"Ġcreation":5200,"Ġtraffic":5201,"Ġ1961":5202,"Ġpair":5203,"ĠPen":5204,"Ġtim":5205,"istance":5206,"tered":5207,"Ġsexual":5208,"ucky":5209,"Ġelse":5210,"Ġdrink":5211,"Ġlibrary":5212,"Ġvac":5213,"ĠBishop":5214,"achusetts":5215,"Ġurban":5216,"Ġimage":5217,"ĠJustice":5218,"Ġbegins":5219,"Ġpiece":5220,"ĠVill":5221,"Ġgirls":5222,"Ġhar":5223,"ĠLittle":5224,"Ġrecon":5225,"Ġreject":5226,"Ġvotes":5227,"Ġsimple":5228,"Ġswe":5229,"Ġ1956":5230,"Ġnecessary":5231,"ĠLike":5232,"ĠDet":5233,"Ġsect":5234,"ĠRoute":5235,"ĠDam":5236,"'re":5237,"ĠKar":5238,"Ġranked":5239,"Ġinstrument":5240,"Ġrain":5241,"Ġconfirmed":5242,"Ġdoctor":5243,"rowd":5244,"ĠRaj":5245,"ĠQueens":5246,"ĠChild":5247,"Ġconnected":5248,"rec":5249,"Ġcontest":5250,"iot":5251,"formation":5252,"Ġimmigr":5253,"aun":5254,"Ġmarked":5255,"Ġbought":5256,"Ġcho":5257,"ĠEven":5258,"And":5259,"ĠTro":5260,"Ġbey":5261,"Ġminister":5262,"ĠMassachusetts":5263,"ĠUSA":5264,"Ġnormal":5265,"Ġchosen":5266,"Ġhappened":5267,"Ġrefused":5268,"Ġscoring":5269,"ĠMinistry":5270,"Ġallows":5271,"includ":5272,"Ġ1939":5273,"Ġcarri":5274,"Ġneeds":5275,"Ġclaims":5276,"Ġcontemporary":5277,"ĠCz":5278,"Ġobtained":5279,"Ġslightly":5280,"Ġcolumn":5281,"nce":5282,"ervative":5283,"Ġallowing":5284,"ĠDuke":5285,"Ġperformances":5286,"eld":5287,"ĠCommon":5288,"oh":5289,"oms":5290,"apped":5291,"hemat":5292,"ĠLife":5293,"Ġrapid":5294,"Ġpainting":5295,"ĠDar":5296,"emetery":5297,"Ġcompl":5298,"nic":5299,"ĠHind":5300,"Ġbeyond":5301,"Ġconstitu":5302,"Ġapplied":5303,"Ġprovinc":5304,"MA":5305,"ĠJon":5306,"Ġ1947":5307,"Ġdistribution":5308,"estic":5309,"stitution":5310,"Ġparliament":5311,"Ġattacks":5312,"Ġexact":5313,"adelph":5314,"ĠGuard":5315,"Ġteaching":5316,"Bl":5317,"ĠOffic":5318,"bourne":5319,"ĠPakistan":5320,"ims":5321,"Ġhabit":5322,"ww":5323,"Ġ44":5324,"Ġsucceeded":5325,"Ġsand":5326,"Ġcheck":5327,"Ġseats":5328,"lers":5329,"ĠBase":5330,"Ġstock":5331,"Ġliterature":5332,"iat":5333,"Ġclasses":5334,"awn":5335,"ĠHor":5336,"Ġbegin":5337,"ĠWild":5338,"Ġliber":5339,"Ġsoftware":5340,"Ġsport":5341,"Ġcry":5342,"Ġshall":5343,"Ġsculpt":5344,"div":5345,"iny":5346,"ĠLady":5347,"Ġconsum":5348,"Ġ*":5349,"uous":5350,"ules":5351,"Ġfine":5352,"Ġpowerful":5353,"ĠUl":5354,"Ġ1958":5355,"ĠSupreme":5356,"Ġgovern":5357,"Ġexperiment":5358,"Ġnort":5359,"Ġbrothers":5360,"Ġfish":5361,"aug":5362,"ĠOk":5363,"ĠMike":5364,"Ġsecondary":5365,"onom":5366,"ĠLew":5367,"ĠJoe":5368,"ĠWay":5369,"ĠMir":5370,"Ġ1959":5371,"ashion":5372,"Ġachieved":5373,"Ġanalysis":5374,"gal":5375,"ĠFI":5376,"ĠEnter":5377,"Ġofficials":5378,"urer":5379,"Ġfacility":5380,"amin":5381,"Ġcells":5382,"Ġdisease":5383,"ĠHighway":5384,"Ġsupply":5385,"Ġassociation":5386,"Ġhear":5387,"Ġfought":5388,"Ġformation":5389,"see":5390,"raq":5391,"36":5392,"Ġsites":5393,"ologist":5394,"omer":5395,"ĠThrough":5396,"ĠKorea":5397,"ronze":5398,"adelphia":5399,"38":5400,"Ġfeed":5401,"Ġstanding":5402,"Ġ32":5403,"Ġcomedy":5404,"Ġguard":5405,"athan":5406,"ĠPop":5407,"Ġfestival":5408,"Ġvan":5409,"Ġunable":5410,"ĠExp":5411,"Ġoccasion":5412,"ĠBol":5413,"Ġbul":5414,"Ġreturning":5415,"Ġmemory":5416,"Ġmagn":5417,"ĠGh":5418,"Ġextend":5419,"vis":5420,"Ġholds":5421,"Ġaccident":5422,"rig":5423,"ĠFar":5424,"Ġ36":5425,"Ġconcert":5426,"nel":5427,"Ġ500":5428,"Ġbrand":5429,"ĠCop":5430,"Ġinjury":5431,"Ġchalleng":5432,"Ġroof":5433,"Ġlaunch":5434,"ĠOnt":5435,"gg":5436,"ĠJean":5437,"Ġcaught":5438,"Ġcontain":5439,"ĠBell":5440,"ĠNether":5441,"Ġmeasure":5442,"ĠToronto":5443,"ĠAlb":5444,"Ġdial":5445,"Ġfigures":5446,"Ġcommittee":5447,"Ġways":5448,"Ġapparent":5449,"Ã¡n":5450,"Ġunderstand":5451,"ĠBridge":5452,"Ġheadquarters":5453,"akh":5454,"ĠSwedish":5455,"outheast":5456,"elligence":5457,"ĠSher":5458,"ĠAk":5459,"mann":5460,"Ġreports":5461,"Ġversions":5462,"western":5463,"ĠRevolution":5464,"ruit":5465,"ĠRel":5466,"ĠWat":5467,"EC":5468,"ĠSpecial":5469,"ĠStadium":5470,"ĠHarv":5471,"Ġ1957":5472,"Ġphilosop":5473,"ih":5474,"water":5475,"Ġextra":5476,"Ġgone":5477,"Ġadvanced":5478,"ĠLibrary":5479,"ĠDun":5480,"ĠPress":5481,"MS":5482,"Ġdesignated":5483,"Ġauthorities":5484,"real":5485,"ĠHun":5486,"Ä±":5487,"Ġactress":5488,"ĠProgram":5489,"Ġrelatively":5490,"Ġmis":5491,"ancing":5492,"ĠGame":5493,"Ġrestaur":5494,"Ġexisting":5495,"ulty":5496,"gn":5497,"urd":5498,"talion":5499,"Ġcode":5500,"Ġdefined":5501,"Ġtrains":5502,"VD":5503,"Ġsons":5504,"ĠNetwork":5505,"Ã¸":5506,"Ġlake":5507,"Ġwalls":5508,"pton":5509,"Ġportion":5510,"Ġproceed":5511,"ĠPolice":5512,"fl":5513,"PA":5514,"Ġjourn":5515,"ighth":5516,"Ġtower":5517,"uer":5518,"Ġscientific":5519,"ĠSeveral":5520,"ĠOxford":5521,"ĠFle":5522,"Ġsleep":5523,"Ġtheme":5524,"iminal":5525,"chestra":5526,"ĠConf":5527,"ĠAirport":5528,"ĠPhiladelphia":5529,"Ġanimals":5530,"34":5531,"ĠOntario":5532,"oured":5533,"Ġauthority":5534,"Ġconflict":5535,"Ġfans":5536,"39":5537,"acement":5538,"oes":5539,"iday":5540,"Ġsurvey":5541,"Ġsubs":5542,"FC":5543,"Ġdescend":5544,"uled":5545,"Ġregions":5546,"orney":5547,"oty":5548,"ĠFox":5549,"Ġopposition":5550,"Ġoldest":5551,"ĠCa":5552,"Ġaudience":5553,"elve":5554,"ĠMaster":5555,"Ġathlet":5556,"Ġring":5557,"\";":5558,"ES":5559,"Ġ1952":5560,"Ġmachine":5561,"alls":5562,"ulate":5563,"ĠArm":5564,"Ġdisapp":5565,"imal":5566,"Ġbreath":5567,"Ġpartner":5568,"Ġcreating":5569,"Is":5570,"Ġattacked":5571,"Ġinspired":5572,"Ġstorm":5573,"Ġmaterials":5574,"ĠChris":5575,"Ġedge":5576,"Ġsafety":5577,"itors":5578,"Ġfrequently":5579,"Ġrob":5580,"asty":5581,"eed":5582,"ĠEmperor":5583,"Ġeye":5584,"Ġfounder":5585,"Ġentitled":5586,"ĠUr":5587,"sex":5588,"ĠChair":5589,"Ġyellow":5590,"37":5591,"ĠSanta":5592,"Ġwond":5593,"Ġ1955":5594,"Ġarrested":5595,"ĠRod":5596,"ĠLim":5597,"cont":5598,"wing":5599,"ĠAtlantic":5600,"Ġsun":5601,"Âłmm":5602,"akers":5603,"Ġtal":5604,"Ġbrown":5605,"Ġvillages":5606,"Ġelement":5607,"Ġphone":5608,"ĠFair":5609,"Ġbill":5610,"Ġtemple":5611,"Ġaired":5612,"Ġflood":5613,"Ġactions":5614,"Ġaspect":5615,"Ġ1949":5616,"ĠSus":5617,"ĠBudd":5618,"Ġ64":5619,"ĠNaz":5620,"Ġgovernor":5621,"igg":5622,"ova":5623,"Un":5624,"Ġec":5625,"ipped":5626,"Ġadvert":5627,"erland":5628,"ĠKr":5629,"rif":5630,"eller":5631,"ĠVen":5632,"Ġscript":5633,"Ġwinter":5634,"ifically":5635,"anging":5636,"century":5637,"Ġkick":5638,"Ġcritics":5639,"Ġcovers":5640,"ĠMain":5641,"Ġdistricts":5642,"Ġfocused":5643,"wise":5644,"ĠRepresent":5645,"Ġshut":5646,"vin":5647,"ĠIraq":5648,"ĠForest":5649,"weight":5650,"ĠRegister":5651,"ĠNations":5652,"ĠSpe":5653,"ĠKel":5654,"Ġetc":5655,"Ġattempted":5656,"ĠIndepend":5657,"Ġchance":5658,"Ġwindow":5659,"Ġago":5660,"Ġdaily":5661,"Ġshared":5662,"ji":5663,"Ġvisited":5664,"Ġsixth":5665,"sm":5666,"Ġiron":5667,"ĠÎ":5668,"Ġprincipal":5669,"ĠGi":5670,"Ġcommander":5671,"ouri":5672,"Ġ1954":5673,"Ġprotection":5674,"47":5675,"Ġloan":5676,"Ġsurn":5677,"da":5678,"iki":5679,"Ġtall":5680,"ĠAff":5681,"ĠIntern":5682,"worth":5683,"ĠNetherlands":5684,"Ġguest":5685,"ĠSports":5686,"Ġcold":5687,"ĠBand":5688,"Ġchairman":5689,"Ġsyn":5690,"ĠWilson":5691,"Ġven":5692,"Ġtowns":5693,"Ġalt":5694,"ĠHay":5695,"ĠSerb":5696,"Ġwarn":5697,"Ġcert":5698,"ĠCastle":5699,"Ġsets":5700,"Ġcrowd":5701,"bro":5702,"Ġprof":5703,"Ġunknown":5704,"Ġavoid":5705,"Ġrough":5706,"ĠUN":5707,"ĠColon":5708,"Ġattempts":5709,"rep":5710,"aret":5711,"Ġroyal":5712,"Ġtheatre":5713,"Ġcopies":5714,"ĠÐ":5715,"Ġstrength":5716,"100":5717,"Ġheight":5718,"ois":5719,"Ġenemy":5720,"Ġ1953":5721,"also":5722,"Ġdetermined":5723,"Ġpolitics":5724,"Ġmile":5725,"Ġwalked":5726,"Ġdeliver":5727,"eral":5728,"Ġwrite":5729,"iary":5730,"ilton":5731,"ĠTurk":5732,"ĠDue":5733,"Ġbillion":5734,"ĠBetween":5735,"Ġillustr":5736,"osl":5737,"omot":5738,"van":5739,"Ġarts":5740,"text":5741,"Ġexchange":5742,"Ġemot":5743,"Ġ</":5744,"Ġcombat":5745,"ĠHistory":5746,"Ġescape":5747,"LA":5748,"Ġneighborhood":5749,"Ġmine":5750,"Ġtermin":5751,"friend":5752,"Ġclean":5753,"Ġhour":5754,"erb":5755,"ĠHome":5756,"Ġfresh":5757,"ĠTaylor":5758,"48":5759,"ographic":5760,"avel":5761,"law":5762,"ĠNic":5763,"heim":5764,"Ġsetting":5765,"Ġeffective":5766,"Ġpros":5767,"Ġrot":5768,"%)":5769,"Ġadvant":5770,"Ġpublication":5771,"Ġpieces":5772,"Ġcart":5773,"aver":5774,"ĠMarc":5775,"utional":5776,"Ġfields":5777,"Ġagent":5778,"Ġstarring":5779,"ĠMarsh":5780,"Ġwarm":5781,"hedral":5782,"Ġbass":5783,"Ġdepend":5784,"Ġoccupied":5785,"Ġready":5786,"Ġexpress":5787,"othing":5788,"ĠKorean":5789,"anna":5790,"illing":5791,"Ġemployed":5792,"Ġsubsequent":5793,"ĠSweden":5794,"ĠPremier":5795,"Ġsudden":5796,"asy":5797,"Ġanyone":5798,"ER":5799,"Ġreference":5800,"Ġcrime":5801,"rupt":5802,"ĠMun":5803,"Ġdoesn":5804,"Ġchoice":5805,"ĠIndust":5806,"Ġpromotion":5807,"Ġhighway":5808,"Ġconsisted":5809,"Ġhotel":5810,"Ġperforming":5811,"rence":5812,"Ġmethods":5813,"Ġexclus":5814,"ĠLoc":5815,"urance":5816,"eman":5817,"igen":5818,"ĠCub":5819,"sey":5820,"Ġlaid":5821,"HL":5822,"Ġresc":5823,"Ġdistingu":5824,"stead":5825,"Ġreasons":5826,"Ġ_":5827,"Ġapproved":5828,"ĠToday":5829,"Ġshortly":5830,"Ġexistence":5831,"Ġtele":5832,"Ġportray":5833,"Ġreact":5834,"Ġfunding":5835,"lan":5836,"Ġopposed":5837,"Ġbud":5838,"ĠCzech":5839,"Ġlearning":5840,"struction":5841,"Ġwrong":5842,"Â²":5843,"phas":5844,"bu":5845,"isf":5846,"Ġairport":5847,"Ġprepar":5848,"Ġresources":5849,"Ġflat":5850,"Ġreceiving":5851,"Ġvon":5852,"Ġ1951":5853,"Ġextensive":5854,"Ġspect":5855,"ĠOnce":5856,"55":5857,"Ġnotes":5858,"Ġseems":5859,"dd":5860,"Ġbaseball":5861,"ĠAut":5862,"Ġentrance":5863,"ĠBir":5864,"ĠAnton":5865,"Ġsomew":5866,"aints":5867,"esh":5868,"orph":5869,"ĠThough":5870,"vest":5871,"Ġelimin":5872,"ĠMov":5873,"lyn":5874,"Ġ1918":5875,"ĠEnd":5876,"Ġvehicles":5877,"CO":5878,"ropri":5879,"31":5880,"come":5881,"iques":5882,"Sp":5883,"ĠPers":5884,"ĠAh":5885,"Ġharm":5886,"amm":5887,"idden":5888,"anz":5889,"Ã©e":5890,"ĠBh":5891,"ayer":5892,"Ġhero":5893,"ĠRegiment":5894,"illery":5895,"Ġeconomy":5896,"ĠNick":5897,"Ġending":5898,"ĠHal":5899,"Ġvocal":5900,"uct":5901,"Ġweapons":5902,"ropolitan":5903,"Â°":5904,"Ġglobal":5905,"Ġformerly":5906,"ĠEconom":5907,"ĠNight":5908,"Ġvalley":5909,"ĠLight":5910,"Ġnegot":5911,"anth":5912,"Ġletters":5913,"ĠBrad":5914,"raham":5915,"Ġcommissioned":5916,"ĠAtt":5917,"IA":5918,"49":5919,"ĠEp":5920,"Ġcalc":5921,"Ġbackground":5922,"Ġfaced":5923,"Ġbasic":5924,"lywood":5925,"ĠHuman":5926,"while":5927,"ĠOrig":5928,"My":5929,"inth":5930,"ĠSteve":5931,"ĠBusiness":5932,"ĠMedia":5933,"Ġ1936":5934,"Ġnob":5935,"Ġends":5936,"ĠDie":5937,"chers":5938,"dr":5939,"Ġentry":5940,"ĠAddition":5941,"Ġkil":5942,"Ġvehicle":5943,"Ġspok":5944,"Ġ|":5945,"Ġ(;":5946,"ls":5947,"ĠEarl":5948,"ĠAthlet":5949,"Ġguns":5950,"Ġdemand":5951,"Ġahead":5952,"',":5953,"Ġ1938":5954,"ĠTechnology":5955,"pet":5956,"Ġskin":5957,"Ġexpansion":5958,"46":5959,"Ġsurname":5960,"'.":5961,"ĠBeach":5962,"Ġfear":5963,"ureau":5964,"Ġâ":5965,"ĠTownship":5966,"ĠGreg":5967,"ĠCommand":5968,"32":5969,"Ġcontrast":5970,"Ġarticles":5971,"iner":5972,"Ġcalls":5973,"ienn":5974,"ĠKir":5975,"Ġinvited":5976,"ĠTra":5977,"ais":5978,"ĠTal":5979,"Ġeasily":5980,"imens":5981,"Ġwealth":5982,"Ġexecut":5983,"Ġfounding":5984,"ĠGirl":5985,"Ġpup":5986,"Ġdipl":5987,"othes":5988,"Ġinhabit":5989,"Ġign":5990,"Ġvirt":5991,"Ġreading":5992,"ĠCommunity":5993,"Ġcastle":5994,"Ġrear":5995,"aked":5996,"Ġpage":5997,"Ġsought":5998,"bell":5999,"Ġones":6000,"Ġlect":6001,"Bill":6002,"ĠArea":6003,"Ġfinds":6004,"adesh":6005,"stream":6006,"gest":6007,"Ġeveryone":6008,"Ġsym":6009,"osa":6010,"Ġconverted":6011,"ĠTime":6012,"Ġauth":6013,"Ġarchitecture":6014,"Ġfavour":6015,"ĠUs":6016,"Ġapplication":6017,"All":6018,"Ġengineering":6019,"oln":6020,"ĠMexican":6021,"ĠDavis":6022,"ĠRegion":6023,"ĠStephen":6024,"Ġpermanent":6025,"Ġlands":6026,"ĠRom":6027,"Ġinstitutions":6028,"ĠOrgan":6029,"Ġdefense":6030,"ogue":6031,"ĠCult":6032,"Ġvent":6033,"uls":6034,"ĠWalk":6035,"Ġmaximum":6036,"ownt":6037,"outs":6038,"Ġkiss":6039,"umes":6040,"ĠGen":6041,"Ġheavily":6042,"onym":6043,"ĠColor":6044,"Ġcontributed":6045,"ĠAbb":6046,"ĠHan":6047,"Ġoffices":6048,"osite":6049,"Ġplanning":6050,"ocked":6051,"ĠTenn":6052,"ĠMountain":6053,"ĠEs":6054,"Ġextrem":6055,"Ġdocumentary":6056,"mouth":6057,"sky":6058,"anning":6059,"Ġpassing":6060,"aga":6061,"aming":6062,"Ġpull":6063,"Ġ38":6064,"Ġmist":6065,"Ġworldwide":6066,"ĠRh":6067,"Ġcancer":6068,"Ġconsult":6069,"Ġabandoned":6070,"Ġdry":6071,"Ġheaded":6072,"osh":6073,"cow":6074,"uties":6075,"Ġinstruct":6076,"rees":6077,"Ġrise":6078,"Ġretirement":6079,"Ġcenturies":6080,"agan":6081,"That":6082,"Ġrow":6083,"ĠAdministr":6084,"Ġimpl":6085,"Ġcontaining":6086,"Ġspeech":6087,"Ġ...":6088,"ivals":6089,"Ġshape":6090,"orrow":6091,"Ġracing":6092,"Ġimag":6093,"ĠArthur":6094,"ns":6095,"ĠNA":6096,"Ġoccurs":6097,"Ġseconds":6098,"Ġopportunity":6099,"ĠLind":6100,"aria":6101,"ĠManc":6102,"rah":6103,"Ġsac":6104,"Ġreaching":6105,"Ġgrade":6106,"Ġprefer":6107,"Ġfuel":6108,"ĠBad":6109,"ester":6110,"Ġrefers":6111,"Ġwrest":6112,"inners":6113,"ipe":6114,"Ġload":6115,"CAA":6116,"Ġalternative":6117,"Sc":6118,"Ġacts":6119,"organ":6120,"rete":6121,"ĠFurther":6122,"Ġpowers":6123,"Ġdeveloping":6124,"Ġmigr":6125,"Ġultimately":6126,"Ġbes":6127,"Ġproved":6128,"elle":6129,"writer":6130,"Ġperfect":6131,"Ġhun":6132,"ĠTest":6133,"erick":6134,"ĠSab":6135,"ĠShort":6136,"Ġbroken":6137,"ĠOb":6138,"Ġtrail":6139,"Ġox":6140,"hr":6141,"inson":6142,"Ġentertain":6143,"ĠWell":6144,"Ġsuccessfully":6145,"ĠSom":6146,"Ġclimate":6147,"ĠCirc":6148,"ĠMaria":6149,"Ġcas":6150,"osis":6151,"Ġcontained":6152,"Ġoccas":6153,"urches":6154,"Ġworth":6155,"ĠMP":6156,"Ġconnection":6157,"ĠPower":6158,"ĠFord":6159,"ums":6160,"Ġhope":6161,"Ġboat":6162,"ĠFrancis":6163,"ĠStand":6164,"Ġentirely":6165,"former":6166,"uses":6167,"ĠUpon":6168,"ĠPrior":6169,"Ġpropos":6170,"ĠPo":6171,"ĠOnly":6172,"Ġ34":6173,"Ġlocations":6174,"Ġemphas":6175,"elect":6176,"Ġ178":6177,"Ġminute":6178,"DS":6179,"Ġpilot":6180,"Ġproperties":6181,"Ġ1937":6182,"US":6183,"iders":6184,"ĠIndones":6185,"Ġstructures":6186,"Ġrepresenting":6187,"Jo":6188,"ĠInt":6189,"ĠLt":6190,"ĠJer":6191,"Ġbodies":6192,"mes":6193,"Ġfinishing":6194,"Ġorders":6195,"Ġdefend":6196,"ĠAmericans":6197,"long":6198,"ece":6199,"ĠRoss":6200,"ĠAlf":6201,"Ġderived":6202,"life":6203,"hire":6204,"aud":6205,"ĠWel":6206,"Ġcausing":6207,"Ġmetres":6208,"ĠKim":6209,"Ġthrow":6210,"Ġfleet":6211,"OS":6212,"ĠLegisl":6213,"Ġfunds":6214,"Ġexpression":6215,"Ġgeneration":6216,"Ġdream":6217,"ĠBrother":6218,"Ġexperi":6219,"Ġ1919":6220,"Ġaware":6221,"Ġfilled":6222,"Ġpossess":6223,"Ġstarts":6224,"Ġequal":6225,"pool":6226,"Ġheat":6227,"gment":6228,"zen":6229,"Ġmel":6230,"Ġidentity":6231,"mun":6232,"PS":6233,"ĠForm":6234,"Ġfunctions":6235,"wegian":6236,"'ll":6237,"Ġqualified":6238,"uccess":6239,"ĠChapter":6240,"Ġapart":6241,"Ġsteel":6242,"Ġadapt":6243,"ĠPrize":6244,"ĠProject":6245,"Ġlyrics":6246,"Ġrom":6247,"Ġswim":6248,"Ġfeeling":6249,"Ġ33":6250,"Ġtemperature":6251,"ranch":6252,"arry":6253,"99":6254,"'ve":6255,"achelor":6256,"Ġanimal":6257,"Ġplot":6258,"ĠMelbourne":6259,"ĠAbout":6260,"Ġpolic":6261,"ĠEvery":6262,"ĠPit":6263,"Ġideas":6264,"Ġsust":6265,"ĠMarg":6266,"Ġmulti":6267,"ĠSlov":6268,"ĠJews":6269,"ĠSpring":6270,"Ġclosely":6271,"Ġtwelve":6272,"Ġbottom":6273,"Ġtouchdown":6274,"agh":6275,"Ġprice":6276,"Ġcompar":6277,"olished":6278,"ĠChristmas":6279,"Ã£":6280,"ĠSunday":6281,"Ġdecades":6282,"ĠBarb":6283,"after":6284,"Ġthick":6285,"Ġjudge":6286,"Ġdomestic":6287,"ĠDVD":6288,"Ġsupporting":6289,"Ġsave":6290,"Ġexpressed":6291,"Ġhumans":6292,"Ġnarr":6293,"Ġcorrect":6294,"Ġtor":6295,"ĠDor":6296,"Ġinfluenced":6297,"ĠJournal":6298,"Ġ37":6299,"Ġstadium":6300,"eke":6301,"aze":6302,"ĠFederation":6303,"AR":6304,"ĠSquad":6305,"inder":6306,"apore":6307,"Ġ1917":6308,"ĠHoly":6309,"ĠGro":6310,"ĠKhan":6311,"Ġvolume":6312,"Ġtechnical":6313,"tical":6314,"ĠChannel":6315,"ader":6316,"iang":6317,"44":6318,"Ġdriver":6319,"ĠLewis":6320,"Ġdecor":6321,"ĠMedical":6322,"iments":6323,"Ġformal":6324,"ii":6325,"ĠBor":6326,"ref":6327,"Ġbands":6328,"Ġdeploy":6329,"Ġcycl":6330,"ĠJunior":6331,"Ġopin":6332,"Ġincorporated":6333,"Ġrequest":6334,"Ġprogress":6335,"Ġgets":6336,"place":6337,"apes":6338,"Ġcalling":6339,"ĠKal":6340,"Ġspoke":6341,"Ġbronze":6342,"ĠHart":6343,"ĠFire":6344,"ĠMoscow":6345,"Ġrival":6346,"Ġrein":6347,"ĠTrust":6348,"Ġmaintained":6349,"%.":6350,"fall":6351,"Ġmayor":6352,"Ġhired":6353,"cious":6354,"ĠLet":6355,"Ġgrad":6356,"ĠBalt":6357,"Ġmotion":6358,"ĠBarn":6359,"ĠNap":6360,"Ġincident":6361,"lets":6362,"ĠAnth":6363,"ĠSix":6364,"incoln":6365,"La":6366,"Ġpartnership":6367,"Ġfashion":6368,"Ġquant":6369,"Ġdiam":6370,"Ġsector":6371,"Ġfailure":6372,"Ġneck":6373,"Ġengaged":6374,"Ġhydro":6375,"Ġappoint":6376,"track":6377,"Ġboys":6378,"Ġimpr":6379,"ĠSav":6380,"aki":6381,"aks":6382,"olec":6383,"Ġalleged":6384,"Ġhyp":6385,"Ġtownship":6386,"Ġopposite":6387,"Ġ1935":6388,"ĠNative":6389,"Ġgall":6390,"rim":6391,"ĠJesus":6392,"Ġnuclear":6393,"ĠThus":6394,"ĠKat":6395,"Ġquestions":6396,"Ġregarding":6397,"Ġunf":6398,"ĠWars":6399,"Ġcru":6400,"Ġmyself":6401,"uation":6402,"IC":6403,"antic":6404,"Ġdress":6405,"wick":6406,"Ġeducated":6407,"65":6408,"ĠNorwegian":6409,"Ġchose":6410,"ĠTa":6411,"Ġtrained":6412,"ĠEP":6413,"Ġ1914":6414,"Ġestablishment":6415,"ĠPier":6416,"Ġrepeated":6417,"pur":6418,"Ġeducational":6419,"AF":6420,"Ġreligion":6421,"Ġmerch":6422,"Ġscale":6423,"ĠCambridge":6424,"Ġcategory":6425,"Ġevening":6426,"Ġaged":6427,"Ġimportance":6428,"Ġkilling":6429,"abad":6430,"Ġreign":6431,"Ġsail":6432,"Ġceremony":6433,"ocese":6434,"equ":6435,"Ġcomposer":6436,"Ġscheduled":6437,"esota":6438,"Ġaccompan":6439,"Ġresear":6440,"ĠCountry":6441,"ĠNorway":6442,"Ġliterary":6443,"Ġargued":6444,"ĠGolden":6445,"acent":6446,"Ġinters":6447,"Ġsole":6448,"uese":6449,"Ġinvestigation":6450,"Ġinternal":6451,"aska":6452,"Ġuncle":6453,"Ġobserved":6454,"Ġbrain":6455,"ĠGer":6456,"Ġbriefly":6457,"keep":6458,"Ġpossibly":6459,"Ġpasses":6460,"enz":6461,"ĠTony":6462,"ĠJacob":6463,"Ġkit":6464,"but":6465,"ĠLabor":6466,"Ġwitness":6467,"ĠStock":6468,"Ġphase":6469,"Ġsupposed":6470,"Ġfolk":6471,"Ġfaith":6472,"Ġvolunte":6473,"Ġprogramme":6474,"owa":6475,"Ġmerged":6476,"ĠSu":6477,"Ġ)":6478,"ami":6479,"Ġconsecutive":6480,"unch":6481,"195":6482,"father":6483,"Ġaid":6484,"Ġproducing":6485,"Ġslowly":6486,"ĠWeek":6487,"Ġspecifically":6488,"esc":6489,"ika":6490,"Ġmoth":6491,"ĠBall":6492,"Ġinstall":6493,"ĠPhilip":6494,"Ġdecre":6495,"Ġ1933":6496,"Ġresigned":6497,"verse":6498,"Ġstandards":6499,"under":6500,"owntown":6501,"Ġdrop":6502,"Ġrecognition":6503,"uration":6504,"oster":6505,"Ġast":6506,"Ġenvironmental":6507,"Ġhur":6508,"ĠMilitary":6509,"Ġlegend":6510,"Ġperhaps":6511,"Ġpatients":6512,"ĠPass":6513,"orders":6514,"otic":6515,"ĠManchester":6516,"Ġviolence":6517,"ĠVietnam":6518,"Ġpromote":6519,"Ġbeautiful":6520,"Ġvoted":6521,"Ġskills":6522,"Ġ300":6523,"yo":6524,"ĠMinnesota":6525,"Ġpoly":6526,"Ġthinking":6527,"ource":6528,"Ġhomes":6529,"Ġstating":6530,"Ġexpect":6531,"ĠPope":6532,"jan":6533,"Ġ1900":6534,"rell":6535,"lines":6536,"Ġinhabitants":6537,"ĠGil":6538,"state":6539,"ĠKansas":6540,"ĠStone":6541,"ĠSingapore":6542,"Ġindependence":6543,"Ġmarg":6544,"ĠSem":6545,"then":6546,"Ġment":6547,"Billboard":6548,"Ġbrick":6549,"pson":6550,"Ġ1929":6551,"ĠDer":6552,"Ġstret":6553,"Ġimprove":6554,"ĠWhit":6555,"wich":6556,"Ġinaug":6557,"Ġcollected":6558,"Cl":6559,"ĠBi":6560,"ĠQueensland":6561,"Ġregistered":6562,"ĠPhilippines":6563,"alo":6564,"Ġpassenger":6565,"ĠLeon":6566,"Ġgain":6567,"ĠMemorial":6568,"erts":6569,"onsin":6570,"ĠBureau":6571,"95":6572,"ushing":6573,"Ġscenes":6574,"roc":6575,"ĠTok":6576,"tainment":6577,"utation":6578,"Ġbehavior":6579,"ĠHou":6580,"Ġvisual":6581,"Ġfoundation":6582,"Ãº":6583,"ĠCape":6584,"ĠLincoln":6585,"Ġjoining":6586,"Ġlearned":6587,"isconsin":6588,"liest":6589,"ĠCensus":6590,"ĠSciences":6591,"eless":6592,"essee":6593,"Ġsmile":6594,"Ġcup":6595,"Ġrepresentative":6596,"Ġstrike":6597,"Ġcandidates":6598,"ĠClark":6599,"Ġregarded":6600,"Ġemp":6601,"Ġstatement":6602,"regon":6603,"Ġfram":6604,"Ġbelief":6605,"Ġchest":6606,"ĠSimon":6607,"Ġrose":6608,"Ġweather":6609,"ĠTurn":6610,"Ġlimit":6611,"ĠMalays":6612,"Ġreality":6613,"Ġsan":6614,"Ġinstalled":6615,"king":6616,"Ġdoll":6617,"ashed":6618,"hered":6619,"ĠTai":6620,"Ġ1928":6621,"ateur":6622,"ĠCas":6623,"ĠJane":6624,"Ġ1934":6625,"ĠHo":6626,"Ġshell":6627,"Ġsell":6628,"Ġclin":6629,"Ðµ":6630,"Ġadvantage":6631,"Ġcatch":6632,"acter":6633,"Ġprogramming":6634,"Ġcore":6635,"Ġnegative":6636,"Ġtrip":6637,"Ġclassical":6638,"Ġnor":6639,"boy":6640,"ĠMissouri":6641,"Ġwouldn":6642,"uts":6643,"Ġjournalist":6644,"Ġfat":6645,"isa":6646,"Ġsignal":6647,"ĠUt":6648,"Ġsafe":6649,"ĠStudies":6650,"Ġstands":6651,"Ġconcluded":6652,"Ġviews":6653,"Ð¾":6654,"ĠBru":6655,"Ġcompete":6656,"ĠVo":6657,"kes":6658,"ĠSri":6659,"iti":6660,"ĠNCAA":6661,"ivered":6662,"ĠMrs":6663,"Ġjunior":6664,"Ġemployees":6665,"Ġethnic":6666,"Ġlat":6667,"ĠWisconsin":6668,"Ġchemical":6669,"ĠMiller":6670,"SR":6671,"ilation":6672,"ternal":6673,"Ġdates":6674,"Ġsort":6675,"Ġ48":6676,"Ġturns":6677,"Ġbudget":6678,"ĠEth":6679,"Ġactual":6680,"TC":6681,"76":6682,"ĠLabour":6683,"ĠGab":6684,"ici":6685,"where":6686,"Ġcool":6687,"iversary":6688,"Ġbirds":6689,"Ġexerc":6690,"umin":6691,"icks":6692,"Ġprotein":6693,"78":6694,"ĠAustria":6695,"Ġimproved":6696,"Ġinteract":6697,"ĠFree":6698,"Ġvice":6699,"ective":6700,"Ġexhibition":6701,"Ġdescribes":6702,"ĠLo":6703,"SP":6704,"ecution":6705,"Ġtruth":6706,"Ġadvance":6707,"ĠFinal":6708,"Ġrich":6709,"Ð°":6710,"42":6711,"ĠColorado":6712,"Ġcloser":6713,"ĠPortuguese":6714,"Ġtransform":6715,"ĠBos":6716,"Ġarmed":6717,"Ġsurvived":6718,"ĠTurkey":6719,"ĠWeb":6720,"Ġreaction":6721,"spec":6722,"ĠFinn":6723,"Ġsubstant":6724,"Ġcontrolled":6725,"zona":6726,"ĠFellow":6727,"Ġhockey":6728,"gers":6729,"Å«":6730,"ĠTennessee":6731,"Ġprofession":6732,"ĠCab":6733,"ĠAdam":6734,"Ġlegs":6735,"Ġmort":6736,"Ġsuppor":6737,"ĠBaron":6738,"Ġgraduate":6739,"Ġconsisting":6740,"Ġlandsc":6741,"Ġ1910":6742,"oming":6743,"anned":6744,"Ġkid":6745,"Ġflu":6746,"Ġengines":6747,"Ġleads":6748,"ito":6749,"ĠRose":6750,"Ġ150":6751,"Ġille":6752,"Ġhill":6753,"Ġsale":6754,"Ġcauses":6755,"Ġplayoff":6756,"forc":6757,"Ġstayed":6758,"66":6759,"Ġsinging":6760,"Ġconsequ":6761,"isms":6762,"Ġadap":6763,"itzerland":6764,"How":6765,"Ġwaters":6766,"Ġgreatest":6767,"ori":6768,"Ġitems":6769,"Ġiniti":6770,"Ġdetails":6771,"Ġemerg":6772,"ĠMunicip":6773,"ĠNFL":6774,"aro":6775,"Ġ75":6776,"Ġdrawn":6777,"entially":6778,"Ġpaintings":6779,"Ġ49":6780,"ked":6781,"Ġhuge":6782,"Ġoperate":6783,"Ġlocomot":6784,"ĠOregon":6785,"Ġdraft":6786,"Ġfreedom":6787,"Ġcosts":6788,"Ġanswer":6789,"Ġmathemat":6790,"run":6791,"ĠHard":6792,"Ġ1924":6793,"Ġcooper":6794,"Ġinterested":6795,"ographer":6796,"Ġgod":6797,"Ġcorpor":6798,"Ġvir":6799,"Ġ400":6800,"ĠVice":6801,"ĠMatt":6802,"ĠWinter":6803,"attle":6804,"Ġaffected":6805,"rait":6806,"DA":6807,"Ġpoetry":6808,"Ġruled":6809,"Ġexped":6810,"ĠPoint":6811,"41":6812,"ĠIndiana":6813,"ĠTen":6814,"ĠGord":6815,"ĠPlaces":6816,"Ġcriminal":6817,"Ġwins":6818,"andy":6819,"Ġwings":6820,"Ġflo":6821,"ĠRon":6822,"ooth":6823,".âĢĻ":6824,"Ġ1932":6825,"Ġshowing":6826,"ublin":6827,"Ġsolid":6828,"agues":6829,"fe":6830,"adow":6831,"ĠTurkish":6832,"Ġprepared":6833,"Ġvalues":6834,"ĠHarry":6835,"Ġdie":6836,"Ġflying":6837,"ĠMaryland":6838,"ĠStat":6839,"Ġduty":6840,"gor":6841,"Ġselection":6842,"Ġinjured":6843,"Ġparalle":6844,"una":6845,"clusion":6846,"ĠAffairs":6847,"Ġsymbol":6848,"Ġdriving":6849,"ello":6850,"Ġcourses":6851,"Ã£o":6852,"Ġobjects":6853,"anes":6854,"uther":6855,"ĠLiberal":6856,"Ġcricket":6857,"Ġdismiss":6858,"box":6859,"anton":6860,"zz":6861,"Ġrebu":6862,"Ġremark":6863,"lig":6864,"Ġapplications":6865,"Ġjur":6866,"ĠBah":6867,"Ġ1922":6868,"Ġpicked":6869,"Ġpraised":6870,"Ġusers":6871,"night":6872,"ocks":6873,"eler":6874,"aduate":6875,"Ġreserve":6876,"oli":6877,"Ġsoul":6878,"Ġinterior":6879,"iva":6880,"Ġinterests":6881,"Ġble":6882,"ĠOcean":6883,"Ġexplained":6884,"inally":6885,"olis":6886,"Ġparticipate":6887,"roke":6888,"Ġreduce":6889,"Ġweak":6890,"ĠTemple":6891,"ĠWrit":6892,"alty":6893,"Ġrooms":6894,"Ġadmitted":6895,"Ġax":6896,"Oh":6897,"orage":6898,"ologies":6899,"Ġfactory":6900,"Ġpicture":6901,"eding":6902,"Ġpool":6903,"Ġpurchase":6904,"Ġenroll":6905,"ĠSwitzerland":6906,"Ġrugby":6907,"Ä«":6908,"ĠNiger":6909,"Ġ1927":6910,"Ġsteam":6911,"owned":6912,"Ġtechniques":6913,"Ġid":6914,"Ġbond":6915,"Ġregularly":6916,"asure":6917,"Ġfiction":6918,"Ġstreets":6919,"overty":6920,"ĠMcG":6921,"Ġassess":6922,"atures":6923,"Ġeasy":6924,"Ġmand":6925,"Ġdivers":6926,"omy":6927,"east":6928,"ĠFer":6929,"Ġroads":6930,"Ġsynt":6931,"Ġfranch":6932,"Ġquiet":6933,"ĠAuthor":6934,"ĠAst":6935,"Ġnortheast":6936,"icide":6937,"anguage":6938,"Ġreserv":6939,"ĠDu":6940,"Ġagency":6941,"Ġ1931":6942,"olas":6943,"Ġjourney":6944,"Ġhors":6945,"Ġcrown":6946,"spe":6947,"Ġearliest":6948,"Ġcombination":6949,"ĠArizona":6950,"Ġtruck":6951,"Ġgrass":6952,"Ġdiplom":6953,"Ġchain":6954,"Ġassumed":6955,"ĠInfantry":6956,"Ġtypical":6957,"Mar":6958,"going":6959,"Yes":6960,"ĠExecutive":6961,"icit":6962,"icians":6963,"Ġstores":6964,"Ġaccused":6965,"Ġ1921":6966,"Ġshif":6967,"Ġresidence":6968,"je":6969,"bar":6970,"Ġbuy":6971,"Ġopera":6972,"ache":6973,"ĠGram":6974,"Ġ1912":6975,"Tr":6976,"ĠBon":6977,"85":6978,"ekend":6979,"ooking":6980,"Ġpersonnel":6981,"Ġweb":6982,"heastern":6983,"hist":6984,"She":6985,"Ġgrounds":6986,"77":6987,"Ġagricultural":6988,"Ġdistributed":6989,"Ġwaiting":6990,"Ġwindows":6991,"Ġadvent":6992,"Ġimages":6993,"Ġinvasion":6994,"emic":6995,"Ġdevice":6996,"ĠManagement":6997,"Ġtick":6998,"Ġshel":6999,"Ġunderstanding":7000,"ĠId":7001,"ĠYour":7002,"Ġcircum":7003,"Ġnick":7004,"including":7005,"Ġacid":7006,"ĠJam":7007,"lah":7008,"anga":7009,"Ġsubsid":7010,"ĠHamilton":7011,"Ġtropical":7012,"aren":7013,"ĠIV":7014,"ĠHoward":7015,"Ġraid":7016,"Ġkilomet":7017,"Ġcommit":7018,"Ġfly":7019,"ghan":7020,"Ġadjacent":7021,"Ġintroduction":7022,"ĠJess":7023,"Ġmicro":7024,"Ġunus":7025,"ĠMember":7026,"ordan":7027,"Ġrevolution":7028,"Ġgraph":7029,"Ġcod":7030,"Ġsections":7031,"ĠMedal":7032,"ructure":7033,"Ġbenef":7034,"Ġmap":7035,"ĠFM":7036,"ĠMagazine":7037,"Ġmissing":7038,"Ġcoordin":7039,"odox":7040,"Ġresistance":7041,"ĠJay":7042,"Ġconvent":7043,"ĠBeng":7044,"Ġfit":7045,"Ġdescript":7046,"Ġattached":7047,"term":7048,"oto":7049,"Ġgarden":7050,"Ġdifference":7051,"Ġsuperv":7052,"Ġcomic":7053,"Ġancest":7054,"wealth":7055,"ommod":7056,"ĠIslamic":7057,"Ġcarrying":7058,"Ġ1925":7059,"ĠRoy":7060,"So":7061,"Ġpremiered":7062,"Ġpione":7063,"Ġislands":7064,"Ġcommitted":7065,"hetic":7066,"ĠBurn":7067,"Ġselling":7068,"Ġ39":7069,"heme":7070,"Ġnodd":7071,"urday":7072,"Ġmusicians":7073,"ĠBrigade":7074,"Ġextension":7075,"Ġtail":7076,"anged":7077,"ĠForeign":7078,"Ġhistorian":7079,"ĠAli":7080,"Ġwriters":7081,"Ġexperienced":7082,"ĠDown":7083,"ĠNich":7084,"Ġgene":7085,"anges":7086,"ĠSecurity":7087,"ĠArmen":7088,"Ġjazz":7089,"aser":7090,"ĠSwiss":7091,"ques":7092,"aughters":7093,"As":7094,"ĠCroat":7095,"Ġoperates":7096,"Ġbusinesses":7097,"ĠTelevision":7098,"ĠWy":7099,"Ġ1923":7100,"ĠDomin":7101,"Ġturning":7102,"Ġconstituency":7103,"Ġwatched":7104,"point":7105,"Ġequival":7106,"ikh":7107,"vant":7108,"ĠBab":7109,"Ġtries":7110,"angers":7111,"Ġ1915":7112,"Ġremov":7113,"ĠSquare":7114,"Ġseventh":7115,"ĠStaff":7116,"Ġban":7117,"aza":7118,"Ġpainted":7119,"Ġshoulder":7120,"Ġ1916":7121,"Ġchurches":7122,"Do":7123,"Ġlicens":7124,"Ġmedium":7125,"ĠMean":7126,"eline":7127,"IT":7128,"Ġdebuted":7129,"dam":7130,"ĠJoh":7131,"ĠRural":7132,"Ġmessage":7133,"Ġeat":7134,"Ġ:":7135,"ĠTs":7136,"IN":7137,"ĠServices":7138,"Ġgoods":7139,"ilst":7140,"Ġsmiled":7141,"ĠSum":7142,"agu":7143,"Ġdecade":7144,"Ġcharges":7145,"Ġexamples":7146,"ĠGib":7147,"Ġengineer":7148,"ĠAbd":7149,"DP":7150,"Ġrailroad":7151,"ĠEngineering":7152,"Ġ1926":7153,"Ġdesigns":7154,"Ġsuburb":7155,"Ġcharged":7156,"ducing":7157,"don":7158,"//":7159,"Ġuniform":7160,"kh":7161,"Ġexpand":7162,"ĠUkrain":7163,"Ġreplace":7164,"Ġdelivered":7165,"anches":7166,"ĠOt":7167,"icial":7168,"Ġfired":7169,"ĠHur":7170,"ĠEarly":7171,"Ġbiggest":7172,"Ġenl":7173,"ĠWalter":7174,"Ġextremely":7175,"rac":7176,"Ġisol":7177,"olt":7178,"Ġnorthwest":7179,"abled":7180,"ĠHere":7181,"Ġsecretary":7182,"Ġadvoc":7183,"Be":7184,"Ġrating":7185,"apping":7186,"ĠPalest":7187,"Ġotherwise":7188,"Ġvo":7189,"Ġtra":7190,"Ġwave":7191,"Ġtheat":7192,"Ġegg":7193,"Ġpresidential":7194,"Ġphilosophy":7195,"ugar":7196,"Ġmir":7197,"Ġrejected":7198,"Ġzone":7199,"ĠMarine":7200,"ĠLes":7201,"Ġproced":7202,"ĠLieutenant":7203,"ĠDal":7204,"Ġwait":7205,"El":7206,"Ġcapture":7207,"Ġregiment":7208,"Ġpoll":7209,"ieval":7210,"Ġassault":7211,"icate":7212,"roit":7213,"ĠDiego":7214,"enny":7215,"ĠBuilding":7216,"Äį":7217,"anny":7218,"Ġwounded":7219,"resents":7220,"ĠTransport":7221,"ĠGreece":7222,"ĠPrim":7223,"Ġdetermine":7224,"uv":7225,"Ġheads":7226,"John":7227,"Ġnote":7228,"ĠReview":7229,"ĠAnne":7230,"ĠForces":7231,"ĠLow":7232,"Ġcomposition":7233,"68":7234,"ĠTel":7235,"Ġsnow":7236,"ĠBrian":7237,"Ġteachers":7238,"claimed":7239,"aired":7240,"Ġaccommod":7241,"Ġthousands":7242,"Ġaccur":7243,"ĠRem":7244,"Ġbatt":7245,"Ġdeleg":7246,"avia":7247,"Ġspr":7248,"ogether":7249,"ĠPot":7250,"ĠFame":7251,"ĠKentucky":7252,"Ġfing":7253,"Ġnotably":7254,"ĠFront":7255,"Ġterror":7256,"Ġdamaged":7257,"ching":7258,"Ġowners":7259,"season":7260,"Ġdegrees":7261,"rine":7262,"who":7263,"Ġresemb":7264,"ĠEntertainment":7265,"unnel":7266,"ĠNaval":7267,"Ġsitting":7268,"Ġpiano":7269,"Ġped":7270,"Ġlooks":7271,"Ġsession":7272,"Ġmarine":7273,"ĠAnderson":7274,"ĠDougl":7275,"ĠPa":7276,"agen":7277,"Ġhappy":7278,"ĠMit":7279,"ĠHollywood":7280,"://":7281,"ĠIsraeli":7282,"ĠZh":7283,"Ġdrew":7284,"ĠKey":7285,"obe":7286,"ĠOak":7287,"Ġmo":7288,"atically":7289,"ĠDiv":7290,"Ġpurposes":7291,"43":7292,"Ġcourts":7293,"Ġprize":7294,"Ġpriest":7295,"Ġwants":7296,"Ġseparated":7297,"Ġpassengers":7298,"Ġarrival":7299,"Ġdepth":7300,"Ġcinem":7301,"Ġrepresents":7302,"Ġintelligence":7303,"ĠSquadron":7304,"Ġbag":7305,"Ġresidential":7306,"ĠInternet":7307,"Ġdispl":7308,"Ġelectronic":7309,"ĠKa":7310,"Ġaccompanied":7311,"ĠHeart":7312,"Ġrub":7313,"burn":7314,"ĠFamily":7315,"thew":7316,"ayed":7317,"ĠColomb":7318,"Ġrelief":7319,"ĠBowl":7320,"ĠHockey":7321,"Ġbot":7322,"rot":7323,"ĠRen":7324,"Ġdocuments":7325,"Ġsty":7326,"ĠAud":7327,"ĠHouston":7328,"ĠList":7329,"Ġrefuge":7330,"Ġsurg":7331,"aron":7332,"orry":7333,"istol":7334,"Ġwooden":7335,"ĠIS":7336,"iley":7337,"ĠDur":7338,"only":7339,"Ġracial":7340,"Ġpoverty":7341,"Ġfinding":7342,"If":7343,"ture":7344,"adi":7345,"Ġretained":7346,"Ġappropri":7347,"pes":7348,"Ġstarred":7349,"level":7350,"Ġstages":7351,"79":7352,"know":7353,"Ã¼r":7354,"Ġpushed":7355,"Ġaw":7356,"Ġsequence":7357,"RC":7358,"arsh":7359,"Ġsight":7360,"ĠCommonwealth":7361,"Ġplate":7362,"Ġupd":7363,"Ġfactors":7364,"Ġcoff":7365,"Ġham":7366,"Ġuser":7367,"Ġchallenge":7368,"ĠRa":7369,"Re":7370,"iller":7371,"Ġsed":7372,"ĠArk":7373,"Ġobserv":7374,"ĠVis":7375,"Ġduties":7376,"Ġnodded":7377,"asts":7378,"oa":7379,"Ġresponsibility":7380,"Ġvocals":7381,"ĠNat":7382,"Ġconqu":7383,"rene":7384,"ĠMississ":7385,"enh":7386,"Ġmolec":7387,"argo":7388,"Ġrenov":7389,"ĠAdditionally":7390,"usal":7391,"ingly":7392,"Ġcapable":7393,"Ġlawyer":7394,"ĠImperial":7395,"dale":7396,"ĠWolf":7397,"ceived":7398,"ĠPatrick":7399,"Ġcollaboration":7400,"Ġshooting":7401,"ĠDoctor":7402,"__":7403,"ĠSenior":7404,"pper":7405,"Ġteen":7406,"Ġoverl":7407,"ĠAD":7408,"ĠBelg":7409,"Ġfixed":7410,"Ġinvestment":7411,"Ġcris":7412,"ĠMayor":7413,"Ġsatisf":7414,"iami":7415,"ĠBuck":7416,"ĠAllen":7417,"Ġinher":7418,"Ġdoct":7419,"ĠColl":7420,"ĠFund":7421,"Ġcredited":7422,"ĠKu":7423,"des":7424,"Ġbishop":7425,"rum":7426,"hus":7427,"ippi":7428,"ĠHotel":7429,"ĠConnect":7430,"Ġseeing":7431,"Ġvary":7432,"ĠAle":7433,"ĠEric":7434,"86":7435,"Ġtransition":7436,"Ġreturns":7437,"Ġnone":7438,"usted":7439,"Ġrestored":7440,"Star":7441,"ĠSound":7442,"ĠRegional":7443,"Ġresign":7444,"uster":7445,"Ġthirty":7446,"Ġcommunication":7447,"do":7448,"ĠHans":7449,"ĠQuebec":7450,"ompl":7451,"ÃŃa":7452,"stan":7453,"Ġsteps":7454,"Ġframe":7455,"Ġpersons":7456,"po":7457,"di":7458,"aste":7459,"thodox":7460,"uly":7461,"ĠReal":7462,"Ġretail":7463,"Ġmanner":7464,"ception":7465,"Ġrecip":7466,"ĠFarm":7467,"Pr":7468,"Ġveter":7469,"Ġhelping":7470,"190":7471,"Ġwheel":7472,"ĠHills":7473,"Ġdating":7474,"aire":7475,"osure":7476,"hammad":7477,"Ġencounter":7478,"Ġhits":7479,"ĠLanc":7480,"Ġsubjects":7481,"ĠUkrainian":7482,"Ġbaby":7483,"ĠNik":7484,"insula":7485,"ĠVillage":7486,"Ġ42":7487,"Ġoffering":7488,"ext":7489,"ĠFrederick":7490,"ĠInstead":7491,"evin":7492,"ĠMerc":7493,"Ġarranged":7494,"Ġmilit":7495,"Ġtalking":7496,"Ġmembership":7497,"Ġcovering":7498,"Ġfan":7499,"ĠGri":7500,"Ġcomput":7501,"ĠRoc":7502,"rome":7503,"Ġsignificantly":7504,"Ġliqu":7505,"ogen":7506,"Ġsuggests":7507,"Ġ1911":7508,"acc":7509,"ieties":7510,"Ġinstitution":7511,"ĠChairman":7512,"Ġcous":7513,"Ġ1913":7514,"Ġroutes":7515,"Ġstruck":7516,"Ġunsuccess":7517,"ardens":7518,"ĠAM":7519,"ĠBry":7520,"oles":7521,"inding":7522,"ĠAlab":7523,"Ġgrown":7524,"rafted":7525,"kay":7526,"iable":7527,"uerto":7528,"ĠRyan":7529,"Ġrenew":7530,"vements":7531,"ĠRun":7532,"ĠGordon":7533,"ĠLtd":7534,"angel":7535,"jo":7536,"Ã³w":7537,"Ġhadn":7538,"Ġinnov":7539,"ĠRet":7540,"ogan":7541,"ifications":7542,"Ġtank":7543,"icon":7544,"Ġcredit":7545,"etime":7546,"body":7547,"Ph":7548,"Ġforg":7549,"Ġcriticized":7550,"Ġcontributions":7551,"ĠDanish":7552,"oly":7553,"Ġdefeating":7554,"Ġconvinc":7555,"AM":7556,"Ġdivor":7557,"Ġsoutheast":7558,"rently":7559,"Ġensure":7560,"AP":7561,"ĠAdministration":7562,"ĠArgentina":7563,"igenous":7564,"aux":7565,"stances":7566,"ners":7567,"Ġcolour":7568,"ĠHug":7569,"pa":7570,"Ġclim":7571,"ĠÄ":7572,"Ġwine":7573,"Ġplanet":7574,"Ġpopularity":7575,"IV":7576,"Ġ1890":7577,"ads":7578,"Ġrestaurant":7579,"Ġjump":7580,"ĠSarah":7581,"ishment":7582,"Ġbringing":7583,"Ġlips":7584,"Ġmeasures":7585,"64":7586,"olly":7587,"ĠClin":7588,"ĠDick":7589,"Ġprotected":7590,"avig":7591,"Ġaer":7592,"ĠPlan":7593,"Ġgrab":7594,"ĠThird":7595,"Ġempt":7596,"ĠGrant":7597,"ĠChile":7598,"Ġgather":7599,"acher":7600,"lahoma":7601,"Ġfactor":7602,"Ġraise":7603,"ĠSilver":7604,"Ġsevere":7605,"TS":7606,"ĠSel":7607,"ĠJordan":7608,"Ġ55":7609,"idel":7610,"Ġaccompl":7611,"ĠBou":7612,"Ġmusician":7613,"ĠAC":7614,"icut":7615,"Ġsurrounded":7616,"Ġphen":7617,"Ġweekend":7618,"ĠPrix":7619,"Ġpreced":7620,"ĠDetroit":7621,"oen":7622,"Ġoption":7623,"Ġexplos":7624,"BI":7625,"related":7626,"aned":7627,"Ġaspects":7628,"hab":7629,"Ġassistance":7630,"ĠGallery":7631,"Ġflowers":7632,"88":7633,"Man":7634,"ĠDublin":7635,"Ġpublishing":7636,"ĠDesign":7637,"Ġsouthwest":7638,"For":7639,"ellite":7640,"ĠAnna":7641,"Ġfranchise":7642,"Ġgang":7643,"ĠMoore":7644,"Ġexactly":7645,"Ġinvolving":7646,"ĠCommunist":7647,"67":7648,"Ġtranslated":7649,"Ġcompr":7650,"ĠSamuel":7651,"Ġtied":7652,"istant":7653,"Ġvision":7654,"Ġcrossing":7655,"Ġutil":7656,"issance":7657,"ĠMeanwhile":7658,"election":7659,"Ġclassic":7660,"ĠDouglas":7661,"Ġbear":7662,"Ġcontext":7663,"Ġneighbour":7664,"Ġ1908":7665,"Ġveget":7666,"Ġreleg":7667,"Ġchampions":7668,"Ġpainter":7669,"Ġspend":7670,"eries":7671,"ĠCEO":7672,"Ġpolicies":7673,"host":7674,"avalry":7675,"Ġnaval":7676,"Ġdaughters":7677,"odge":7678,"Ġcycle":7679,"ĠAlabama":7680,"ĠHarvard":7681,"ĠAdv":7682,"found":7683,"arant":7684,"otte":7685,"ĠBart":7686,"mers":7687,"Ġroughly":7688,"ĠDave":7689,"Ġsomewhat":7690,"Ġexception":7691,"Ġdefensive":7692,"Ġdifferences":7693,"Ġmyth":7694,"ĠYouth":7695,"ĠCemetery":7696,"Ġdevices":7697,"Ġdemocr":7698,"ĠIowa":7699,"ĠEc":7700,"uzz":7701,"ilk":7702,"ĠAlbum":7703,"edding":7704,"Ġinterpret":7705,"Ġarchae":7706,"ĠAnthony":7707,"Ġfaculty":7708,"Ġopinion":7709,"Ġmobile":7710,"Ġcomfort":7711,"ĠRepresentatives":7712,"69":7713,"eor":7714,"Ġwinners":7715,"Ġpointed":7716,"ĠRy":7717,"inch":7718,"borough":7719,"ĠHarris":7720,"ĠModern":7721,"Äĥ":7722,"Ġanniversary":7723,"Ġtheater":7724,"ĠHawai":7725,"ĠPuerto":7726,"Ġauthors":7727,"ĠLyn":7728,"Ġsolution":7729,"inburgh":7730,"ĠDean":7731,"Ġrequires":7732,"TO":7733,"Ġbare":7734,"Ġflows":7735,"Ġconcerns":7736,"ĠChildren":7737,"Ġplane":7738,"Ġappearing":7739,"angerous":7740,"raph":7741,"ĠVienn":7742,"There":7743,"coming":7744,"uma":7745,"Ġmedicine":7746,"ĠLouisiana":7747,"Ġprovincial":7748,"Ġscholar":7749,"Ġlegislation":7750,"bass":7751,"ĠOfficer":7752,"Ġsurre":7753,"Ġsam":7754,"EE":7755,"Ġorganisation":7756,"Ġrelative":7757,"rix":7758,"Ġmeters":7759,"Ġmarry":7760,"Ġmining":7761,"rons":7762,"ĠAfghan":7763,"But":7764,"Ġinstance":7765,"Ġlinked":7766,"ĠSin":7767,"car":7768,"ĠMand":7769,"ĠRailroad":7770,"Ġrates":7771,"Ġtur":7772,"Ġmurd":7773,"Ġfrag":7774,"Ġlanding":7775,"Ġwalking":7776,"Ġfalls":7777,"ribute":7778,"overs":7779,"ĠTournament":7780,"star":7781,"ĠStew":7782,"ĠOklahoma":7783,"ĠRick":7784,"ĠSpace":7785,"Ġuniversities":7786,"Ġcommune":7787,"ĠMiami":7788,"Ġadapted":7789,"ĠMatthew":7790,"mosp":7791,"ĠCommander":7792,"ĠChart":7793,"ĠTaiwan":7794,"ĠDenmark":7795,"Ġtack":7796,"ĠBrun":7797,"Ġnovels":7798,"hyth":7799,"idges":7800,"ĠPear":7801,"ĠOttoman":7802,"Ġru":7803,"ĠJuan":7804,")\"":7805,"Ġnickn":7806,"ĠMorgan":7807,"iece":7808,"ĠSon":7809,"otten":7810,"Ġmountains":7811,"Ġhorses":7812,"Ġrent":7813,"ĠPhill":7814,"ĠNa":7815,"Ġenh":7816,"ĠCost":7817,"ĠInn":7818,"iac":7819,"ĠPict":7820,"ĠMountains":7821,"Ġdowntown":7822,"Ġthreatened":7823,"cription":7824,"Ġprotest":7825,"uscript":7826,"ĠNY":7827,"ĠDeputy":7828,"ĠCooper":7829,"ĠBelgium":7830,".'":7831,"eland":7832,"Ġrealized":7833,"oyd":7834,"Ġphotograph":7835,"Ġkingdom":7836,"Ne":7837,"Ġconcerned":7838,"ĠBerg":7839,"Ġfur":7840,"ĠWin":7841,"Ġimprison":7842,"Ġbranches":7843,"Ġpapers":7844,"hess":7845,"ĠRey":7846,"die":7847,"Ġsuddenly":7848,"Ġsuccessor":7849,"Ġcolonial":7850,"ĠTreat":7851,"ante":7852,"elson":7853,"ĠLank":7854,"ĠMississippi":7855,"Ġstepped":7856,"Ġbrig":7857,"Ġexpert":7858,"atherine":7859,"Ġclassified":7860,"ĠFive":7861,"Ġ(),":7862,"wen":7863,"ĠConstitution":7864,"ĠMcK":7865,"mm":7866,"Ġweekly":7867,"Ġreputation":7868,"Ġbanks":7869,"Ġkeeping":7870,"ista":7871,"Ġconstant":7872,"phone":7873,"ĠDC":7874,"ĠConc":7875,"ĠPap":7876,"enez":7877,"lad":7878,"pir":7879,"Ġ]":7880,"arner":7881,"ĠKam":7882,"Ġmissed":7883,"ĠGulf":7884,"Ġparallel":7885,"Ġseed":7886,"ĠKarl":7887,"Ġachieve":7888,"ĠEdinburgh":7889,"ĠBack":7890,"Ġsecure":7891,"ĠEag":7892,"Ġbenefit":7893,"Ġspiritual":7894,"cons":7895,"Ġanth":7896,"Ġalco":7897,"Ġupgr":7898,"ĠGerm":7899,"ĠMontreal":7900,"Ġtechnique":7901,"owed":7902,"Ġchildhood":7903,"ĠBrazilian":7904,"Ġadding":7905,"ardo":7906,"Ġmassive":7907,"72":7908,"Ġpractices":7909,"ĠRoberts":7910,"encing":7911,"Ġaffect":7912,"Ġownership":7913,"Ġexisted":7914,"Ġactors":7915,"Well":7916,"Ġasks":7917,"struct":7918,"On":7919,"imore":7920,"ĠSR":7921,"ĠBattalion":7922,"Ġfold":7923,"ĠLiver":7924,"ĠReserve":7925,"profit":7926,"ĠBaseball":7927,"ĠKelly":7928,"Ġpublications":7929,"Ġwearing":7930,"Ġstorage":7931,"Ġthousand":7932,"ĠPolit":7933,"ĠPalace":7934,"Ġscheme":7935,"Ġdivisions":7936,"ĠNev":7937,"Ġequivalent":7938,"General":7939,"Ġentering":7940,"eff":7941,"Ġdies":7942,"ĠCare":7943,"Ġvictims":7944,"ĠLin":7945,"Ġrecru":7946,"utt":7947,"Ġdoors":7948,"ĠTamil":7949,"erk":7950,"ĠUkraine":7951,"pective":7952,"Ġsoil":7953,"Ġformally":7954,"Ġstudying":7955,"Ġreplied":7956,"ellect":7957,"inian":7958,"98":7959,"Ġteach":7960,"Ġprisoners":7961,"Ġrequirements":7962,"ĠExpress":7963,"Ġcrisis":7964,"agg":7965,"SC":7966,"allas":7967,"ifer":7968,"ĠDisney":7969,"Ġrefere":7970,"ĠHamp":7971,"ĠLive":7972,"iliar":7973,"ĠTerrit":7974,"mate":7975,"iter":7976,"Ġdepos":7977,"Ġprompt":7978,"Ġcarbon":7979,"atever":7980,"ĠOrchestra":7981,"acle":7982,"igious":7983,"Ġpeaked":7984,"amps":7985,"Ġforming":7986,"Ġx":7987,"Ġmental":7988,"Ġtesting":7989,"eenth":7990,"ui":7991,"ĠAustrian":7992,"Ġreplacement":7993,"62":7994,"ĠRugby":7995,"Ġwet":7996,"from":7997,"Ġgender":7998,"miral":7999,"ĠAlan":8000,"Ġ1880":8001,"ĠIndependent":8002,"ĠCow":8003,"oria":8004,"Ġjuris":8005,"ĠSaturday":8006,"ĠSee":8007,"sch":8008,"ĠErn":8009,"Con":8010,"58":8011,"ĠPitts":8012,"Ġcamera":8013,"Ġpret":8014,"ĠUC":8015,"Ġincreasingly":8016,"Ġconsiderable":8017,"Ġcards":8018,"ĠColonel":8019,"door":8020,"Ġunp":8021,"ivated":8022,"Ġcouples":8023,"acon":8024,"Ġfingers":8025,"Ġcoastal":8026,"eway":8027,"Ġclearly":8028,"ework":8029,"Ġobvious":8030,"ĠShah":8031,"Ġ1905":8032,"ĠConnecticut":8033,"ĠMargaret":8034,"Ġhosts":8035,"Ġtie":8036,"Ġnotice":8037,"Ġcelebrated":8038,"Ġdeclined":8039,"ĠAge":8040,"ĠAtlanta":8041,"Ġtranslation":8042,"ĠWelsh":8043,"ĠDig":8044,"De":8045,"Ġfal":8046,"ĠNag":8047,"ĠAssoci":8048,"Ġspoken":8049,"Ġcompetitions":8050,"Ġtemporary":8051,"asters":8052,"\":":8053,"Ġsquadron":8054,"Ġlose":8055,"uri":8056,"ĠEle":8057,"En":8058,"Ġadvis":8059,"ĠAntonio":8060,"ĠABC":8061,"ĠPrin":8062,"bal":8063,"):":8064,"Ġcomponents":8065,"ĠUnlike":8066,"Ġvisitors":8067,"Ġoverse":8068,"Ġindicated":8069,"Ġweapon":8070,"Ġjustice":8071,"Ġmeets":8072,"Ġbath":8073,"Ġearn":8074,"Ġstrongly":8075,"Ġapartment":8076,"Ġinstruments":8077,"Ġcriticism":8078,"intend":8079,"Ġfruit":8080,"EA":8081,"Ġvisible":8082,"Ġfict":8083,"Ġ1906":8084,"hew":8085,"umped":8086,"Ġexperiences":8087,"Ġconcrete":8088,"Ġdiagn":8089,"Ġfer":8090,"Ġbright":8091,"Ġcharts":8092,"Ġappointment":8093,"ĠSky":8094,"Ġbeach":8095,"lete":8096,"ĠCarn":8097,"IP":8098,"Ġabsor":8099,"ĠLam":8100,"ĠIron":8101,"enses":8102,"unes":8103,"Ġfishing":8104,"exp":8105,"ĠRights":8106,"olid":8107,"Ġoccupation":8108,"ounced":8109,"III":8110,"Ġdrawing":8111,"tenance":8112,"ĠLaure":8113,"Ġrend":8114,"Ġwhis":8115,"ĠPC":8116,"Ġdebate":8117,"Ġchanging":8118,"May":8119,"Ġwel":8120,"ĠCrown":8121,"ĠRow":8122,"veland":8123,"ĠCru":8124,"ĠFA":8125,"Ġinfluential":8126,"olph":8127,"Ġeleven":8128,"rat":8129,"Ġtheore":8130,"using":8131,"ĠKevin":8132,"tic":8133,"tan":8134,"Ġshook":8135,"mina":8136,"Ind":8137,"emor":8138,"Ġtight":8139,"Pro":8140,"Ġcoverage":8141,"ĠAlexand":8142,"Ġstrategy":8143,"Ġmovements":8144,"Ġcolleg":8145,"Ġ1907":8146,"Ġtelling":8147,"Ġdesire":8148,"Ġassass":8149,"ĠKennedy":8150,"ĠBan":8151,"rett":8152,"Ġrif":8153,"Ã©s":8154,"ĠLawrence":8155,"Ġexpedition":8156,"Ad":8157,"nold":8158,"Ġprocesses":8159,"Ġpitch":8160,"ĠWhe":8161,"Ġapparently":8162,"Ġforests":8163,"ĠCook":8164,"emen":8165,"ĠDNA":8166,"Ġmedieval":8167,"Ġplus":8168,"Ġmanuscript":8169,"ĠPhys":8170,"Ġ41":8171,"story":8172,"Ġdated":8173,"71":8174,"Ġfiled":8175,"called":8176,"Ġoccasions":8177,"Ġtherap":8178,"ĠStudios":8179,"rehens":8180,"top":8181,"63":8182,"Ġguitarist":8183,"Ġenjoyed":8184,"Ġdeputy":8185,"ĠWalker":8186,"Ġspeaking":8187,"ĠKaz":8188,"edia":8189,"Ġsynd":8190,"Ġhung":8191,"ĠCass":8192,"Ġpoem":8193,"74":8194,"Ġmarkets":8195,"ĠPortugal":8196,"ĠLiverpool":8197,"ĠSport":8198,"Ġnations":8199,"Ġannually":8200,"Ġproposal":8201,"Ġheritage":8202,"59":8203,"ĠNever":8204,"Ġacknow":8205,"Ġwatching":8206,"Ġlasted":8207,"ĠVienna":8208,"ĠBes":8209,"Ġrapidly":8210,"udi":8211,"ĠTrib":8212,"osm":8213,"ĠHell":8214,"ci":8215,"Ġtennis":8216,"ĠCleveland":8217,"Ġcrossed":8218,"Ġalive":8219,"Ġdynasty":8220,"ĠFil":8221,"Ġaccounts":8222,"ancer":8223,"Ġchoose":8224,"itter":8225,"ĠAy":8226,"Ġ1909":8227,"ando":8228,"ĠSeattle":8229,"Ġassembly":8230,"rik":8231,"Ġwick":8232,"Ġvessels":8233,"ocol":8234,"ĠMicro":8235,"ni":8236,"ibl":8237,"Ġshore":8238,"Am":8239,"LC":8240,"Ġoffensive":8241,"Ġcited":8242,"Ġinner":8243,"amic":8244,"ĠMetropolitan":8245,"Wh":8246,"ĠHeritage":8247,"bel":8248,"61":8249,"Ġevolution":8250,"Ġprohib":8251,"Ġkitchen":8252,"Ġqualifying":8253,"pping":8254,"astery":8255,"opher":8256,"Ġsufficient":8257,"Ġwithdraw":8258,"ĠEver":8259,"Ġoccasionally":8260,"Ġhearing":8261,"ench":8262,"ĠDeb":8263,"Ġoutput":8264,"ĠYug":8265,"arest":8266,"ighters":8267,"Ġfilmed":8268,"Ġtreated":8269,"Ġhundreds":8270,"Ġcontinuing":8271,"estyle":8272,"Ġfil":8273,"Ġelder":8274,"Ġunusual":8275,"ĠFern":8276,"Ġacted":8277,"erted":8278,"Ġrecept":8279,"Ġgar":8280,"Ġexcell":8281,"ĠTokyo":8282,"Ġvic":8283,"Ġmakeup":8284,"Ġlosses":8285,"ĠWho":8286,"Ġsigning":8287,"ribed":8288,"hard":8289,"ige":8290,"Ġeval":8291,"Ġworship":8292,"Ġaffairs":8293,"Can":8294,"rm":8295,"Ġartillery":8296,"Ġgraduating":8297,"Ġfurn":8298,"ĠKings":8299,"rastructure":8300,"ĠĠ":8301,"Ġpregn":8302,"Ġdenied":8303,"ĠLocal":8304,"ĠPeters":8305,"Ġrecordings":8306,"ĠMalaysia":8307,"52":8308,"Ġpure":8309,"Ġassign":8310,"ĠWithin":8311,"ĠHop":8312,"Ġreplacing":8313,"Ġtraveled":8314,"Ġurg":8315,"ĠLegislative":8316,"Ġnet":8317,"Ġtex":8318,"Ġmemorial":8319,"Ġprime":8320,"Ġatmosp":8321,"andom":8322,"Ġextens":8323,"--":8324,"aware":8325,"Ġattracted":8326,"itals":8327,"break":8328,"ĠPun":8329,"merce":8330,"oves":8331,"Ġappeal":8332,"Ġfalling":8333,"ĠFac":8334,"eron":8335,"OR":8336,"ĠPed":8337,"ĠAgency":8338,"ĠBush":8339,"orf":8340,"Ġtools":8341,"Ġsurf":8342,"ĠLev":8343,"Ġsurviving":8344,"ĠLane":8345,"ÅŁ":8346,"ymn":8347,"Ġneut":8348,"Ġrounds":8349,"abel":8350,"Ġunderground":8351,"acked":8352,"town":8353,"ĠOperation":8354,"Pl":8355,"ĠBud":8356,"lock":8357,"Ġbegun":8358,"PC":8359,"ĠIndonesia":8360,"ĠDark":8361,"08":8362,"rated":8363,"hips":8364,"Ġintention":8365,"ĠMaur":8366,"Ġgrey":8367,"Ġneither":8368,"Ġapproval":8369,"ogy":8370,"\"\"":8371,"ĠHand":8372,"ĠHispan":8373,"ĠKer":8374,"ographical":8375,"mus":8376,"cing":8377,"Ġartistic":8378,"ĠConservative":8379,"Ex":8380,"ĠOd":8381,"Ġvessel":8382,"Ġ1904":8383,"Ġcompletion":8384,"Ġsky":8385,"ĠFal":8386,"Ġmanufacturing":8387,"pered":8388,"Ġprint":8389,"Ġboundary":8390,"Ġpric":8391,"Se":8392,"Ġgate":8393,"ĠAlliance":8394,"Ġhurt":8395,"ĠHungarian":8396,"Ġuseful":8397,"Ġlap":8398,"Ġsounds":8399,"ĠPow":8400,"ĠMond":8401,"ĠOriginally":8402,"Ġsees":8403,"Ã¥":8404,"ĠUpper":8405,"ctic":8406,"ĠBeat":8407,"ultan":8408,"Ġrivers":8409,"ĠRoger":8410,"Ġlicense":8411,"hand":8412,"ĠBaltimore":8413,"Ġnom":8414,"ĠSoon":8415,"ĠConvention":8416,"09":8417,"ĠSud":8418,"Ġhat":8419,"pha":8420,"ĠNob":8421,"Ġemergency":8422,"ĠInit":8423,"mingham":8424,"Ġsubmar":8425,"rapped":8426,"Ġdangerous":8427,"Ġeliminated":8428,"atin":8429,"ĠUnt":8430,"Ġcompeting":8431,"ration":8432,"leased":8433,"rip":8434,"Ġmagic":8435,"Ġwhilst":8436,"amental":8437,"antasy":8438,"Ġmodified":8439,"ĠTit":8440,"Ġmob":8441,"Ġillegal":8442,"Ġcousin":8443,"prise":8444,"ĠAlong":8445,"Ġreun":8446,"Âłmillion":8447,"Ġdescribe":8448,"ĠJason":8449,"ulating":8450,"ĠDefense":8451,"vey":8452,"Ġride":8453,"inction":8454,"ĠGarden":8455,"Ġsoundtrack":8456,"ĠTar":8457,"ĠVar":8458,"gress":8459,"ĠCole":8460,"essions":8461,"sea":8462,"atern":8463,"gun":8464,"%,":8465,"ruption":8466,"Ġattorney":8467,"ĠCrit":8468,"Ġcrop":8469,"Ġwides":8470,"izon":8471,"Ġster":8472,"Ġloyal":8473,"ĠHonor":8474,"apolis":8475,"ĠHungary":8476,"gow":8477,"Ġ1870":8478,"Ġemerged":8479,"Ġamongst":8480,"Ġfled":8481,"Ġpanel":8482,"MP":8483,"bishop":8484,"Ġspending":8485,"oviÄĩ":8486,"ĠBull":8487,"Ġgreatly":8488,"Ġeffectively":8489,"Ġresponded":8490,"Ġlists":8491,"89":8492,"Ġtact":8493,"Ġwedding":8494,"eah":8495,"ĠCall":8496,"ĠDa":8497,"Ġsupplies":8498,"ĠSi":8499,"ĠLang":8500,"Ġstress":8501,"Ġfest":8502,"Ġfrequency":8503,"iege":8504,"ĠOrthodox":8505,"Ġlaugh":8506,"ĠJudge":8507,"ĠEvent":8508,"bra":8509,"Ġfinals":8510,"ĠRub":8511,"Ġmedals":8512,"Ġrestrict":8513,"Ġhabitat":8514,"Ġcrash":8515,"ĠOpera":8516,"ĠAustin":8517,"Ġwish":8518,"force":8519,"Ġmeetings":8520,"ĠRap":8521,"Ġcontroversial":8522,"73":8523,"Ġcircuit":8524,"Ġisn":8525,"Ġ1902":8526,"Ġinvolvement":8527,"Ġequipped":8528,"ĠBeck":8529,"orig":8530,"Ġdecline":8531,"SS":8532,"ĠVinc":8533,"Ġedited":8534,"ĠChen":8535,"ĠDisc":8536,"ĠMoon":8537,"Ġagree":8538,"Ġmonument":8539,"theless":8540,"Ġ1901":8541,"ĠSenator":8542,"Ġdistinguished":8543,"Ġjurisd":8544,"Ġamateur":8545,"ĠAgain":8546,"ĠLas":8547,"finals":8548,"ĠSchools":8549,"ĠMission":8550,"ĠCampbell":8551,"ĠLower":8552,"ĠBangl":8553,"ON":8554,"raction":8555,"Ġ52":8556,"ielder":8557,"ET":8558,"Ġexecuted":8559,"ĠSingh":8560,"Ġchapter":8561,"Ġcollections":8562,"Ġhonour":8563,"ĠMeth":8564,"ĠStewart":8565,"elli":8566,"ĠConfeder":8567,"ĠBuff":8568,"Ġfacing":8569,"ĠMach":8570,"Ġvisiting":8571,"Ġbattles":8572,"pat":8573,"Ġpatient":8574,"Ġ43":8575,"Will":8576,"ĠCathedral":8577,"ĠRio":8578,"ĠPA":8579,"Ġsuffering":8580,"pread":8581,"ĠDream":8582,"bach":8583,"bi":8584,"Ġ120":8585,"anne":8586,"Ġcoffee":8587,"Ġnormally":8588,"arc":8589,"ĠNazi":8590,"Ġrecommend":8591,"ossible":8592,"Ġsuicide":8593,"Ġdepending":8594,"Ġtone":8595,"Ġdrag":8596,"ĠYugosl":8597,"Ġnegoti":8598,"Ġshares":8599,"ĠCarter":8600,"ĠNep":8601,"Ã®":8602,"ayan":8603,"Ġminimum":8604,"ĠRussell":8605,"phony":8606,"ĠPeace":8607,"Ġcounties":8608,"sec":8609,"orer":8610,"ĠFinally":8611,"ĠNon":8612,"Or":8613,"Ġ1903":8614,"Ġsweet":8615,"ĠBruce":8616,"ĠFinland":8617,"ĠWard":8618,"vo":8619,"Ġwhereas":8620,"Ġlin":8621,"Ġnomination":8622,"inations":8623,"iah":8624,"wall":8625,"51":8626,"rient":8627,"Ġmode":8628,"Ġbeet":8629,"54":8630,"Ġcolle":8631,"Ġeld":8632,"ĠSaf":8633,"ĠCre":8634,"ĠFather":8635,"Ġpron":8636,"ĠChall":8637,"ĠBrothers":8638,"abilities":8639,"ĠNash":8640,"Ġintellect":8641,"Ġentertainment":8642,"ĠNort":8643,"Ġtests":8644,"ials":8645,"Ġexists":8646,"zh":8647,"Ġchamber":8648,"ĠYan":8649,"Ġpenalty":8650,"Ġturb":8651,"ĠDyn":8652,"graduate":8653,"ĠAndre":8654,"Ġswitch":8655,"ĠChampions":8656,"Ġnewspapers":8657,"appe":8658,"HS":8659,"ilty":8660,"ĠKy":8661,"ĠJimmy":8662,"ĠFleet":8663,"Ġeighth":8664,"anean":8665,"ĠGlas":8666,"Ġcontroversy":8667,"ĠAthletic":8668,"Ã«":8669,"Ġdesigner":8670,"Ġaggreg":8671,"Ġrecommended":8672,"Ġfile":8673,"Ġdiscip":8674,"ĠPur":8675,"Ġelevation":8676,"words":8677,"away":8678,"ĠGlobal":8679,"ĠShan":8680,"oked":8681,"Ġdefinition":8682,"ÃŃn":8683,"ĠThompson":8684,"ĠBroadway":8685,"ĠFranklin":8686,"shaped":8687,"cha":8688,"ĠPittsburgh":8689,"Ġinfantry":8690,"ĠAdams":8691,"entle":8692,"Ġrepro":8693,"Ġfriendly":8694,"Ġrecre":8695,"hyl":8696,"ĠEnvironment":8697,"Ġapproached":8698,"Ġthro":8699,"ĠMarket":8700,"Ġmoder":8701,"Ġcustomers":8702,"estone":8703,"ĠBirmingham":8704,"seud":8705,"Ġhip":8706,"mates":8707,"Ġlob":8708,"ĠGene":8709,"icop":8710,"ĠLl":8711,"Ġjobs":8712,"ĠPas":8713,"Ġintent":8714,"Ġinjuries":8715,"person":8716,"cop":8717,"otton":8718,"Ġimmediate":8719,"Ġgradually":8720,"53":8721,"GB":8722,"Mus":8723,"ĠIl":8724,"ĠLith":8725,"ĠShortly":8726,"Ġblocks":8727,"Ġmissions":8728,"Ġusual":8729,"leton":8730,"Ġcompilation":8731,"iors":8732,"ultane":8733,"Ġremainder":8734,"onna":8735,"\"-":8736,"ĠAuthority":8737,"Ġgenre":8738,"Ġrescue":8739,"OC":8740,"ĠFel":8741,"ĠPle":8742,"ĠNotable":8743,"Âłk":8744,"tha":8745,"aments":8746,"ĠOp":8747,"Ġafterwards":8748,"Ġsegment":8749,"ĠChamber":8750,"ĠDallas":8751,"ĠRound":8752,"Ġcommanded":8753,"Ġversus":8754,"Ġassemb":8755,"ĠHit":8756,"ideo":8757,"Ġguy":8758,"ĠSet":8759,"ĠSn":8760,"Ġcasual":8761,"ĠMetro":8762,"FM":8763,"ĠNelson":8764,"isition":8765,"master":8766,"aman":8767,"Ġterr":8768,"earing":8769,"annels":8770,"Ġdonated":8771,"Ġlandscape":8772,"Ġcommemor":8773,"ĠChampion":8774,"cm":8775,"orus":8776,"Ġchampionships":8777,"Ġmatters":8778,"Ġmaintenance":8779,"Ġencouraged":8780,"Ġportrayed":8781,"ED":8782,"ĠMarie":8783,"Ġproport":8784,"itched":8785,"ĠLiter":8786,"otype":8787,"ĠLeban":8788,"zo":8789,"Ð¸":8790,"Ġundert":8791,"Ġ51":8792,"Ġparticipation":8793,"Ġposted":8794,"Ġexplain":8795,"ĠDonald":8796,"Ġdeparture":8797,"fire":8798,"teenth":8799,"Ġwidespread":8800,"ĠNorm":8801,"ĠHorn":8802,"las":8803,"Ġprinted":8804,"olo":8805,"ĠVictorian":8806,"Ġdirectors":8807,"ĠAlfred":8808,"Ġtrading":8809,"ĠSym":8810,"dy":8811,"Ġvast":8812,"ĠJosh":8813,"hythm":8814,"Ġloved":8815,"chell":8816,"Ġempty":8817,"]]":8818,"ĠWindows":8819,"uy":8820,"tra":8821,"ĠMorris":8822,"Ġcomplic":8823,"Ġpretty":8824,"Ġthemes":8825,"Ġyoungest":8826,"ĠEnergy":8827,"56":8828,"noon":8829,"ĠMarshall":8830,"Ġmovies":8831,"ĠMichel":8832,"stic":8833,"Ġvalid":8834,"Ġphr":8835,"otes":8836,"Ġ47":8837,"Ġmarketing":8838,"Ġknock":8839,"Ġsurgery":8840,"ĠBible":8841,"athy":8842,"Ġelectoral":8843,"Ġboats":8844,"Ġagents":8845,"ĠWright":8846,"Ġabsence":8847,"ĠSuch":8848,"Ġ46":8849,"Ġextent":8850,"ĠPatri":8851,"ĠJenn":8852,"ÅĦ":8853,"Ġrelationships":8854,"Ġdomain":8855,"Ġninet":8856,"ĠHindu":8857,"Ġsurprise":8858,"Why":8859,"Ã´":8860,"usalem":8861,"ĠVik":8862,"ocket":8863,"Ġshr":8864,"Ġadmin":8865,"ĠOur":8866,"Ġdiscovery":8867,"ĠBed":8868,"Ġintersection":8869,"Ġpopulations":8870,"Ġelig":8871,"Ġmart":8872,"ĠNBC":8873,"Ġtrouble":8874,"Ġpossibility":8875,"Ġodd":8876,"Ġlongest":8877,"Ġstruggle":8878,"aptist":8879,"eo":8880,"ĠJohann":8881,"Ġcable":8882,"ĠVenez":8883,"ĠKnight":8884,"ĠTig":8885,"Ġfictional":8886,"Ġrising":8887,"Ġpale":8888,"Ġblow":8889,"Ġopportunities":8890,"leans":8891,"Ġclothes":8892,"ouver":8893,"oni":8894,"Ġanch":8895,"ĠKit":8896,"urally":8897,"Ġthin":8898,"Ġbreaking":8899,"osph":8900,"ĠFall":8901,"orporated":8902,"ĠWol":8903,"ĠIndians":8904,"Ġconcerts":8905,"Ġsoccer":8906,"uated":8907,"rena":8908,"ĠHold":8909,"Ġcloud":8910,"casting":8911,"Ġyield":8912,"idency":8913,"ologists":8914,"Ġsupports":8915,"Ġchapel":8916,"ĠBilly":8917,"arat":8918,"Ġcul":8919,"Ġunderst":8920,"org":8921,"Ġcenters":8922,"Ġsigns":8923,"Ġdoubt":8924,"Ġvideos":8925,"such":8926,"case":8927,"oom":8928,"Ġexceed":8929,"athered":8930,"Ġwrites":8931,"udes":8932,"iop":8933,"ailand":8934,"ĠLib":8935,"eded":8936,"92":8937,"ĠUntil":8938,"Ġresolution":8939,"Ġsilent":8940,"ĠCBS":8941,"uh":8942,"Ġperiods":8943,"Ġbenefits":8944,"Ġteeth":8945,"Ġemployment":8946,"ĠAT":8947,"Ġcolony":8948,"Ġtribe":8949,"ĠLuke":8950,"Ġarchitectural":8951,"Ġapply":8952,"ationally":8953,"Ġdrugs":8954,"Ġsatellite":8955,"ĠHend":8956,"ĠProtest":8957,"ĠCharlie":8958,"Ġcopy":8959,"Ġlanded":8960,"ĠJose":8961,"stal":8962,"ĠInvest":8963,"style":8964,"57":8965,"abs":8966,"Ġproducers":8967,"Ġnetworks":8968,"Ġthrew":8969,"ĠInformation":8970,"icking":8971,"Ġsurvive":8972,"ĠRobinson":8973,"soft":8974,"ĠBoys":8975,"ĠSac":8976,"uj":8977,"Gr":8978,"Col":8979,"ĠWhy":8980,"Ġinstrumental":8981,"mi":8982,"ĠAround":8983,"Ġattributed":8984,"bound":8985,"Ġaf":8986,"Ġexposed":8987,"aceae":8988,"anner":8989,"Ġdriven":8990,"Ġagriculture":8991,"forcement":8992,"ĠAgricult":8993,"96":8994,"Ġdiameter":8995,"Ġexternal":8996,"ancell":8997,"Ġmoves":8998,"avan":8999,"Qu":9000,"ĠHaving":9001,"ĠMack":9002,"Ġdestruction":9003,"Ġsupporters":9004,"Ã©t":9005,"lon":9006,"Ġclaiming":9007,"rin":9008,"GA":9009,"Ġadaptation":9010,"Ġtransportation":9011,"Ġagencies":9012,"keeper":9013,"asant":9014,"Ġgrandfather":9015,"Ġguess":9016,"Ġhell":9017,"Ġtunnel":9018,"Ġfemin":9019,"auc":9020,"ĠBrooklyn":9021,"ĠSomet":9022,"Ġtoured":9023,"ĠOrleans":9024,"Ġaimed":9025,"Ġbalance":9026,"alia":9027,"Ġ+":9028,"ĠHispanic":9029,"ean":9030,"Ġmounted":9031,"Ġpreserved":9032,"ĠProduct":9033,"Ġcommented":9034,"Ġrepresentation":9035,"Ġpassage":9036,"omes":9037,"Ġstring":9038,"Ġclimb":9039,"Ġillness":9040,"Ġseeking":9041,"fam":9042,"Ġdefending":9043,"Ġcharacteristics":9044,"97":9045,"Ġsick":9046,"Ġconvention":9047,"Ġknows":9048,"Ġvenue":9049,"Ġcontested":9050,"mod":9051,"orous":9052,"Ġbelonged":9053,"acht":9054,"ĠPubl":9055,"Ġasking":9056,"Ġcreative":9057,"ĠVoiv":9058,"ĠDak":9059,"ĠMurray":9060,"ĠArchitect":9061,"Ġadvice":9062,"Ġregime":9063,"**":9064,"usc":9065,"iterr":9066,"Ġnoticed":9067,"Ġstable":9068,"Ġadvertising":9069,"ĠHum":9070,"asa":9071,"Ġpredomin":9072,"Ġinsurance":9073,"ĠKl":9074,"Ġsimpl":9075,"Ġruling":9076,"iously":9077,"Ġbehalf":9078,"Ġdetail":9079,"ĠRomania":9080,"Ġsuspended":9081,"Ġcompetitive":9082,"ĠVic":9083,"ricane":9084,"Ġastron":9085,"á»":9086,"Ġcorporate":9087,"Ġfrequent":9088,"Ġschedule":9089,"ogs":9090,"Ġbon":9091,"Ġviewed":9092,"Ġstrict":9093,"Ġton":9094,"Ġcabinet":9095,"Ġ1898":9096,"Î±":9097,"Ġerected":9098,"ĠChand":9099,"ĠPrincess":9100,"Ġsentence":9101,"Ġaudio":9102,"ĠArkansas":9103,"ĠBeg":9104,"ĠImp":9105,"inea":9106,"Ġrecovered":9107,"Ġendemic":9108,"Ġpalace":9109,"oba":9110,"Ġliquid":9111,"ounsel":9112,"Ġindicate":9113,"ĠAP":9114,"Ġsoldier":9115,"eh":9116,"Ġsubstantial":9117,"mat":9118,"ĠGermans":9119,"ĠÃī":9120,"chi":9121,"ĠHad":9122,"ĠMong":9123,"Ġdetailed":9124,"ĠPlace":9125,"Ġparliamentary":9126,"Ġremembered":9127,"she":9128,"ĠStanley":9129,"mund":9130,"ricted":9131,"Ġinfrastructure":9132,"Ġcategories":9133,"Ġfamiliar":9134,"ĠGraham":9135,"Ġwars":9136,"Ġpercentage":9137,"rock":9138,"ĠDerby":9139,"Ġabroad":9140,"ĠVeg":9141,"onian":9142,"Ġevil":9143,"Ġclassification":9144,"ĠTraining":9145,"span":9146,"Ġdub":9147,"Ġrepresentatives":9148,"iciency":9149,"Ġdescription":9150,"ĠNorman":9151,"Ġdecide":9152,"Ġclosing":9153,"iest":9154,"ĠUtah":9155,"Ġgro":9156,"ĠJerusalem":9157,"odeship":9158,"ĠCanal":9159,"Ġattending":9160,"Ġ1860":9161,"iterranean":9162,"bean":9163,"arks":9164,"Ġstatue":9165,"orted":9166,"Ġda":9167,"ovo":9168,"ĠStev":9169,"ÂłâĢĵ":9170,"ĠChristopher":9171,"rous":9172,"ĠNBA":9173,"Ġfifteen":9174,"Ġmanage":9175,"Ġtalent":9176,"Ġidentify":9177,"lik":9178,"Ġphenomen":9179,"mont":9180,"ĠUE":9181,"ĠThailand":9182,"ported":9183,"ĠFriend":9184,"ĠAndy":9185,"Ġgovernments":9186,"Ġdemolished":9187,"lie":9188,"uda":9189,"Ġranking":9190,"pers":9191,"Ġbid":9192,"fare":9193,"Ġratio":9194,"iveness":9195,"Ġinduct":9196,"ĠIb":9197,"ivation":9198,"Ġtribes":9199,"Ġcash":9200,"ĠJohnny":9201,"ĠMedicine":9202,"din":9203,"len":9204,"Ġcircumstances":9205,"appeared":9206,"Ġinnings":9207,"Ġdominated":9208,"ĠTower":9209,"Ġhanded":9210,"ĠRichmond":9211,"ĠEgyptian":9212,"Ġpredecess":9213,"Ġtort":9214,"ĠWrest":9215,"Ġplatforms":9216,"terior":9217,"Ġremove":9218,"Ġmonitor":9219,"Ġabsol":9220,"Ġparticipants":9221,"Ġdat":9222,"ĠBenn":9223,"ĠCarib":9224,"ĠTheater":9225,"Ġthrone":9226,"Ġalcohol":9227,"Ġreven":9228,"Ġvoting":9229,"Ġoperational":9230,"ĠAld":9231,"Ġworksh":9232,"ĠCher":9233,"Ġranks":9234,"Ġdeaths":9235,"At":9236,"riel":9237,"ĠâĢ¢":9238,"Ġocean":9239,"Ġlieutenant":9240,"Ġcontribution":9241,"Ġinvent":9242,"Ġthoughts":9243,"Ġresiding":9244,"Ġhal":9245,"Ġstyles":9246,"www":9247,"Ġoblig":9248,"Ġceased":9249,"ĠKo":9250,"Ġpossession":9251,"ĠConstant":9252,"ĠVoivodeship":9253,"ĠPy":9254,"Ġwonder":9255,"Ġguilty":9256,"Ġpictures":9257,"Ġexcess":9258,"igs":9259,"ancouver":9260,"isb":9261,"ĠJosÃ©":9262,"Ġextreme":9263,"active":9264,"ĠGlasgow":9265,"andal":9266,"cut":9267,"Ġlie":9268,"ĠFried":9269,"ĠVenezuel":9270,"Ġmathematics":9271,"Ġtempor":9272,"ussian":9273,"Ġchannels":9274,"Ġdebt":9275,"Let":9276,"Ġpatrol":9277,"oga":9278,"Ġassociate":9279,"ulum":9280,"ĠPortland":9281,"Ġappropriate":9282,"cho":9283,"ĠMethod":9284,"Ġpoems":9285,"Ġsaved":9286,"Ġspaces":9287,"Ġadults":9288,"reck":9289,"Ġouter":9290,"Ġroots":9291,"Ġproduces":9292,"iration":9293,"rank":9294,"Ġsmooth":9295,"Ġtom":9296,"ridge":9297,"ĠCarm":9298,"ĠAR":9299,"istical":9300,"rov":9301,"Ġviewers":9302,"iture":9303,"ĠThose":9304,"rama":9305,"Ġpersonality":9306,"Ġbeating":9307,"Ġflew":9308,"Ġsponsored":9309,"geon":9310,"Ġterritories":9311,"à¸":9312,"ĠMovement":9313,"Ġrum":9314,"later":9315,"Ġdefence":9316,"ĠAI":9317,"Ġtenure":9318,"ĠGill":9319,"ĠBelgian":9320,"Ġborders":9321,"Ġprinciples":9322,"Ġpublicly":9323,"iÃ³n":9324,"Ġcomponent":9325,"Ġclothing":9326,"Ġ1899":9327,"Ġ[[":9328,"ĠYorkshire":9329,"uable":9330,"issue":9331,"ĠHeb":9332,"opal":9333,"ĠEqu":9334,"oples":9335,"Ġdiscussed":9336,"ĠFIFA":9337,"how":9338,"Ġreleases":9339,"Ġreportedly":9340,"ĠMaj":9341,"Ġprocessing":9342,"arth":9343,"Ġcharacterized":9344,"Ġbay":9345,"Ġcredits":9346,"cell":9347,"sters":9348,"ĠDub":9349,"ĠCer":9350,"ĠPhoen":9351,"Ġsimultane":9352,"Ġdrove":9353,"ĠRud":9354,"94":9355,"Ġswimming":9356,"ĠWW":9357,"Ġconfer":9358,"acts":9359,"Ġrebuilt":9360,"ĠGa":9361,"zer":9362,"ĠTrade":9363,"ewhere":9364,"Ġnerv":9365,"Ġintegrated":9366,"ĠFinnish":9367,"ĠRico":9368,"West":9369,"Ġbroadcasting":9370,"ivate":9371,"Ġsecured":9372,"Ġduo":9373,"Ġwire":9374,"Ġdescent":9375,"final":9376,"Ġnurs":9377,"Ġdiscont":9378,"ĠDJ":9379,"ĠBachelor":9380,"93":9381,"oca":9382,"Ġdisplayed":9383,"rupted":9384,"Ġhoped":9385,"pm":9386,"ĠCra":9387,"ĠVe":9388,"Ġhandle":9389,"Ġconstitution":9390,"nia":9391,"ĠMediterranean":9392,"ĠTreaty":9393,"asi":9394,"Ġpartners":9395,"ĠSax":9396,"Ġmerchant":9397,"ĠRol":9398,"Ġarc":9399,"Ġrelocated":9400,"Ġfeelings":9401,"Ġscientists":9402,"ĠSimilar":9403,"ouses":9404,"hour":9405,"inned":9406,"oded":9407,"ĠIan":9408,"ĠWorks":9409,"Ġconj":9410,"abil":9411,"Ġgay":9412,"Ġsentenced":9413,"Ġconversation":9414,"ĠBangladesh":9415,"Ġconcentration":9416,"Ġtransmission":9417,"Ġindigenous":9418,"Ġpartly":9419,"Ġburned":9420,"ĠHampshire":9421,"Ġpartially":9422,"ĠTob":9423,"ĠVancouver":9424,"ĠTherefore":9425,"ĠBasketball":9426,"ĠDance":9427,"Ġfalse":9428,"Ġdecides":9429,"âĢĿ.":9430,"ĠMess":9431,"Ġcongreg":9432,"Ġconservative":9433,"irds":9434,"Ġgiant":9435,"emed":9436,"ST":9437,"Ġforth":9438,"eta":9439,"Ġfunded":9440,"ĠFriday":9441,"One":9442,"Ġtribut":9443,"bing":9444,"jamin":9445,"Ġdual":9446,"Ġelectron":9447,"ĠTrophy":9448,"bow":9449,"plement":9450,"Ġbeside":9451,"Ġparam":9452,"Ġapprec":9453,"ijing":9454,"Ġnavig":9455,"iri":9456,"Ġhighlight":9457,"uits":9458,"ĠNord":9459,"ĠDelhi":9460,"eters":9461,"Ġfacilit":9462,"Ġpersu":9463,"Ġfill":9464,"84":9465,"Ġhidden":9466,"illo":9467,"usk":9468,"itable":9469,"Ġexperimental":9470,"xual":9471,"ĠMuslims":9472,"high":9473,"ĠCapital":9474,"Not":9475,"Ġcircle":9476,"Ġinput":9477,"Ġvolumes":9478,"ĠEmer":9479,"ME":9480,"Ġafternoon":9481,"ĠMilan":9482,"ĠGriff":9483,"pent":9484,"Ġresearchers":9485,"ifies":9486,"07":9487,"Ġjunction":9488,"ĠLuther":9489,"Ġtrend":9490,"ĠAfghanistan":9491,"Ġleaf":9492,"ID":9493,"Ġmaybe":9494,"ĠWa":9495,"ĠUnit":9496,"Ġliberal":9497,"ĠHunter":9498,"ĠWarner":9499,"ĠGirls":9500,"Ġassets":9501,"ML":9502,"Ġbeneath":9503,"Ġcolors":9504,"Ġpublisher":9505,"Ġfab":9506,"Ġthir":9507,"ĠEvans":9508,"ĠNeb":9509,"arked":9510,"Ġdownload":9511,"Ġtot":9512,"Ġflash":9513,"ĠChel":9514,"Ġdecisions":9515,"Ġexplo":9516,"foot":9517,"opes":9518,"Ġacknowled":9519,"Ġabuse":9520,"ĠLimited":9521,"rose":9522,"Ġwilling":9523,"Ġreveals":9524,"Ġshift":9525,"ĠRain":9526,"87":9527,"Ġ1896":9528,"eria":9529,"ĠMotor":9530,"Ġavo":9531,"Ġunless":9532,"Ġpursue":9533,"archy":9534,"Ġpor":9535,"Âłcm":9536,"Ġbacter":9537,"Ġimpossible":9538,"angle":9539,"Ġcharity":9540,"rows":9541,"Ġpermission":9542,"ĠBernard":9543,"Ġbeauty":9544,"rÃ©":9545,"Ġ1895":9546,"Ġsword":9547,"ĠWing":9548,"Ġfoss":9549,"Ġearning":9550,"Ġfinger":9551,"2000":9552,"NC":9553,"Dr":9554,"MC":9555,"Ġsettlers":9556,"Ġdinner":9557,"Ab":9558,"Ġcontinu":9559,"Ġmor":9560,"Ġorganised":9561,"hattan":9562,"ĠNam":9563,"Ġcann":9564,"ĠGray":9565,"Ġaffiliated":9566,"arting":9567,"Ġintellectual":9568,"Ġspell":9569,"Ġrepair":9570,"Ġcivilian":9571,"ĠGuy":9572,"Ġpremiere":9573,"Ġtorn":9574,"asp":9575,"ĠDraft":9576,"ivan":9577,"eneration":9578,"ĠRena":9579,"ĠRomanian":9580,"sequently":9581,"ĠGor":9582,"Ġriding":9583,"ĠPlayer":9584,"oking":9585,"ĠGary":9586,"ĠUEFA":9587,"Ġsorry":9588,"Ġsynthes":9589,"ĠFitz":9590,"raid":9591,"Ġromantic":9592,"ĠEnt":9593,"ĠWarren":9594,"attered":9595,"yt":9596,"Ġrated":9597,"Ġgenerated":9598,"closed":9599,"unc":9600,"ĠFood":9601,"Ġprofit":9602,"ĠLud":9603,"Ġsuperior":9604,"oda":9605,"Good":9606,"Ġathletes":9607,"Ġdeployed":9608,"ourse":9609,"ĠNi":9610,"reprene":9611,"ĠMort":9612,"Ġdismissed":9613,"ĠHud":9614,"folk":9615,"zes":9616,"Ġ1000":9617,"Ġlimits":9618,"ĠMans":9619,"ĠExt":9620,"ĠGon":9621,"minute":9622,"Ġcoat":9623,"Ġsisters":9624,"Ġ1897":9625,"ĠThroughout":9626,"net":9627,"irates":9628,"Ġretreat":9629,"Ġimplemented":9630,"ĠCricket":9631,"ĠDefence":9632,"erbai":9633,"ĠMadrid":9634,"about":9635,"Ġgathered":9636,"otal":9637,"fast":9638,"borne":9639,"Ġrunner":9640,"ĠProm":9641,"91":9642,"ĠBomb":9643,"Ġcook":9644,"Ġlights":9645,"Ġputting":9646,"Ġexpensive":9647,"aran":9648,"Ġpatron":9649,"zi":9650,"Ġhunting":9651,"ixed":9652,"Ġ250":9653,"ĠChem":9654,"Ġwaste":9655,"Ġimmigrants":9656,"hill":9657,"agre":9658,"Ġprovision":9659,"ĠLanka":9660,"ĠGrey":9661,"Ġconclusion":9662,"Ġ54":9663,"ĠMuch":9664,"05":9665,"onymous":9666,"ĠBristol":9667,"iph":9668,"lem":9669,"itual":9670,"Ġdiscussion":9671,"ĠMitchell":9672,"Ġunderw":9673,"Ġborough":9674,"ĠInitially":9675,"arma":9676,"arged":9677,"arv":9678,"ĠSA":9679,"Ġinterpre":9680,"Ġur":9681,"ĠAny":9682,"Ġfighter":9683,"Ġmal":9684,"ugh":9685,"Ġopponents":9686,"elected":9687,"Ġfarmers":9688,"Ġlinks":9689,"Ġrestoration":9690,"Ġterminal":9691,"ĠAqu":9692,"Ġsubsidiary":9693,"Ġsymp":9694,"ĠFlore":9695,"ĠSeven":9696,"ĠShip":9697,"ughed":9698,"Ġcommunications":9699,"PR":9700,"Ġelectrical":9701,"Ġanimated":9702,"obi":9703,"Ġinaugural":9704,"Ġessential":9705,"amo":9706,"Ġdim":9707,"They":9708,"ĠMuhammad":9709,"Ġinvolves":9710,"weet":9711,"Ġtouring":9712,"Ġcargo":9713,"urers":9714,"ĠLast":9715,"incorporated":9716,"ĠBarry":9717,"ĠDeath":9718,"ĠParker":9719,"ĠHas":9720,"ĠStudents":9721,"endment":9722,"abet":9723,"ĠMars":9724,"Ġpages":9725,"ĠHarrison":9726,"fielder":9727,"Ġopponent":9728,"ĠCharlotte":9729,"commun":9730,"ĠRand":9731,"Ġgrave":9732,"ĠIv":9733,"Ġhouseholder":9734,"Ġdrafted":9735,"Ġsailed":9736,"Ġthanks":9737,"Ġprove":9738,"Ġjudges":9739,"Ġbusinessman":9740,"ĠMi":9741,"Ġsolar":9742,"Ġconfused":9743,"Ġtexts":9744,"Ġcompens":9745,"Ġclock":9746,"ĠSeason":9747,"Ġdepict":9748,"enger":9749,"Ġlocally":9750,"Ġlaughed":9751,"Ġtimber":9752,"Ġdesk":9753,"Ġcemetery":9754,"Ġlicensed":9755,"ĠKon":9756,"Ġrevenue":9757,"Ġrarely":9758,"Ġrocks":9759,"Ġmines":9760,"azines":9761,"onds":9762,"Ġshock":9763,"Ġninth":9764,"Ġrandom":9765,"ĠSerbian":9766,"Ġdiverse":9767,"Ġlisten":9768,"ĠCarlos":9769,"Ġprovinces":9770,"Ġprinciple":9771,"Ġsuitable":9772,"Ġfavorite":9773,"Ġbelieves":9774,"Ġnose":9775,"82":9776,"Ġstim":9777,"Ġsustain":9778,"ĠWhere":9779,"inking":9780,"mother":9781,"ulu":9782,"ĠCommunications":9783,"Ġdollars":9784,"ĠLatino":9785,"Ġsugar":9786,"ĠNHL":9787,"acre":9788,"Ġestablishing":9789,"81":9790,"uli":9791,"Ġsessions":9792,"Ġvoters":9793,"Ġspir":9794,"scale":9795,"ulus":9796,"endar":9797,"ocation":9798,"Ġexclusively":9799,"ĠMaine":9800,"ĠBaker":9801,"Ġhelicop":9802,"Ġprest":9803,"ashi":9804,"ĠSS":9805,"Ġ1893":9806,"rehensive":9807,"Ġrelation":9808,"Ãł":9809,"ingham":9810,"Ġlatest":9811,"Ġspin":9812,"ĠScient":9813,"ĠSerbia":9814,"ĠEU":9815,"Ġincreases":9816,"ĠNatural":9817,"ĠTele":9818,"fers":9819,"Ġworst":9820,"castle":9821,"stad":9822,"ĠEventually":9823,"Ġanswered":9824,"Ġchronic":9825,"iler":9826,"ĠConstruction":9827,"Ġterminus":9828,"Ġconservation":9829,"Ġmanif":9830,"Ġfocuses":9831,"fish":9832,"ĠMother":9833,"Ġrequested":9834,"Ġisolated":9835,"Ġeldest":9836,"that":9837,"ĠBooks":9838,"ighed":9839,"ĠWayne":9840,"Ġ1889":9841,"Ġpatterns":9842,"zant":9843,"Ġreaches":9844,"Ġunsuccessful":9845,"Ġrib":9846,"apse":9847,"Ġcompleting":9848,"Ġtool":9849,"Ġinitiated":9850,"ĠFalls":9851,"flow":9852,"ĠManhattan":9853,"83":9854,"ĠFine":9855,"ĠArabic":9856,"idal":9857,"resident":9858,"Ġlifted":9859,"ĠMall":9860,"ugs":9861,"Ġexcav":9862,"Ġtill":9863,"aton":9864,"Ġviolent":9865,"ĠAS":9866,"Ġcattle":9867,"Ġconnecting":9868,"anted":9869,"Ġ53":9870,"esty":9871,"ĠGmina":9872,"Ġsang":9873,"ĠAlice":9874,"uper":9875,"ĠStory":9876,"Ġthroat":9877,"ĠFurthermore":9878,"ĠBeijing":9879,"TE":9880,"ĠIns":9881,"bles":9882,"Ġdrummer":9883,"ĠRabb":9884,"olar":9885,"ĠAzerbai":9886,"agar":9887,"Ġmarks":9888,"Ġargument":9889,"Ġescaped":9890,"strong":9891,"Ġwithdrew":9892,"Ġrig":9893,"Ġfitted":9894,"occ":9895,"ĠTan":9896,"ĠMason":9897,"Ġsalt":9898,"gorith":9899,"Ġknowing":9900,"Ġvul":9901,"ĠArena":9902,"Ġ\"\",":9903,"annah":9904,"ĠFace":9905,"Ġfaces":9906,"ĠConserv":9907,"Ġautonom":9908,"Ġpod":9909,"Ġwhatever":9910,"Ġ1892":9911,"Ġlowest":9912,"bat":9913,"Ġhoused":9914,"jab":9915,"kee":9916,"ĠSid":9917,"Ġdemonstrated":9918,"Ġimperial":9919,"Ġunderstood":9920,"Ġtraded":9921,"Ġqualify":9922,"Ġscholarship":9923,"Ġshopping":9924,"ĠTogether":9925,"ĠZone":9926,"ĠAdela":9927,"Ġsubt":9928,"Ã©n":9929,"Ġarrangement":9930,"Ġinitiative":9931,"Ġ1885":9932,"ĠAttorney":9933,"ĠOrganization":9934,"ivia":9935,"mo":9936,"Ġ1850":9937,"ĠRangers":9938,"ĠGrade":9939,"Ġtraditions":9940,"ĠRomanized":9941,"Ġloud":9942,"Ġovers":9943,"Ġassisted":9944,"ĠCaribbean":9945,"Ã¶r":9946,"Ġeggs":9947,"BM":9948,"Ġ1894":9949,"300":9950,"enson":9951,"06":9952,"ĠClinton":9953,"Ġwealthy":9954,"ĠBurg":9955,"uction":9956,"Ġpractical":9957,"arriors":9958,"bul":9959,"Ġheir":9960,"ĠMak":9961,"roud":9962,"Ġbelonging":9963,"Ġcheek":9964,"Ġwore":9965,"unct":9966,"ĠSteel":9967,"Ġmerc":9968,"ĠSalv":9969,"ĠPersian":9970,"ĠRest":9971,"Ġ56":9972,"hum":9973,"Ġsubstitute":9974,"ĠKnow":9975,"ĠThor":9976,"ĠEconomic":9977,"Ġideal":9978,"ĠSeb":9979,"ĠMembers":9980,"Ġelectricity":9981,"Ġtwin":9982,"Ġconscious":9983,"itely":9984,"Ġstem":9985,"ĠClar":9986,"ashwords":9987,"ht":9988,"ĠOrange":9989,"ĠBenjamin":9990,"Ġguests":9991,"ĠBaptist":9992,"Ġhorror":9993,"Ġthereafter":9994,"ĠRecord":9995,"Ġparking":9996,"Ġcontinuous":9997,"Ġgolf":9998,"Ġconfess":9999,"ĠReform":10000,"ĠCarr":10001,"Ġanalog":10002,"Ġemigr":10003,"inental":10004,"angular":10005,"umbent":10006,"Ġmargin":10007,"Ġhelps":10008,"Ġlad":10009,"ĠJama":10010,"IL":10011,"Ġsharp":10012,"icts":10013,"ancellor":10014,"Ġindicates":10015,"ĠCart":10016,"ĠNear":10017,"grade":10018,"Ġpreferred":10019,"Ġenthus":10020,"Ġrect":10021,"Ġtanks":10022,"Ġalliance":10023,"ĠBox":10024,"Ġradical":10025,"Ġstrategic":10026,"olen":10027,"Ġcharter":10028,"Ġstrengthen":10029,"Ġevac":10030,"Ġguide":10031,"ĠCommissioner":10032,"Ġunlike":10033,"asha":10034,"ĠGoth":10035,"ensis":10036,"Ġdispute":10037,"Ġcoalition":10038,"Ġhonorary":10039,"avi":10040,"rooms":10041,"Ġvictim":10042,"Ġstom":10043,"icing":10044,"Ġplain":10045,"Ġmerger":10046,"Ġongoing":10047,"Sm":10048,"Ġdevoted":10049,"Ġboot":10050,"arrier":10051,"roph":10052,"Ġcoaching":10053,"ĠNicholas":10054,"ĠTol":10055,"Ġboundaries":10056,"Ġtreaty":10057,"Ġblind":10058,"ĠGun":10059,"ĠPrincip":10060,"Br":10061,"Ġcamps":10062,"leb":10063,"ĠNigeria":10064,"ĠSingles":10065,"Ġinteresting":10066,"Ġlabour":10067,"ĠKan":10068,"ĠIsa":10069,"Ġels":10070,"Ġmachines":10071,"overe":10072,"Ġdominant":10073,"Ġpip":10074,"Ġalter":10075,"tense":10076,"Ġregulations":10077,"Ġtravelled":10078,"making":10079,"RS":10080,"Ġgift":10081,"aning":10082,"Ġfault":10083,"ibilities":10084,"ĠAssistant":10085,"Ġ1891":10086,"Ġoperator":10087,"Ġminority":10088,"Ġdeck":10089,"leep":10090,"ĠRic":10091,"nik":10092,"Ġsubmitted":10093,"Ġfaster":10094,"ĠDh":10095,"Ġgross":10096,"Ġabst":10097,"ĠGreater":10098,"Ġmagazines":10099,"uki":10100,"Ġmeat":10101,"Ġlying":10102,"Ġbirthday":10103,"ĠTrinity":10104,"Ġemperor":10105,"quir":10106,"Ġsympt":10107,"eling":10108,"Ġindex":10109,"ĠBra":10110,"rafts":10111,"ĠVerm":10112,"agers":10113,"Ġmechanism":10114,"ĠAllied":10115,"Ġelsewhere":10116,"Ġslaves":10117,"Ġsculpture":10118,"ĠCentury":10119,"ĠGet":10120,"fly":10121,"DC":10122,"Ġsurprised":10123,"ĠParish":10124,"annon":10125,"ĠApple":10126,"icle":10127,"ĠPsych":10128,"cribed":10129,"Ġ1865":10130,"ĠPhoenix":10131,"ĠHawaii":10132,"Ġconcerning":10133,"Ġ1888":10134,"ĠBengal":10135,"Ġvs":10136,"Ġprosp":10137,"lar":10138,"ĠProp":10139,"Ġserial":10140,"pled":10141,"Ġoriginated":10142,"Ġforty":10143,"Ġpill":10144,"ĠTib":10145,"nowiki":10146,"Ġnoble":10147,"stance":10148,"ĠAbbey":10149,"Ġinternationally":10150,"Ġcrimes":10151,"Ġfifty":10152,"Ġmunicipalities":10153,"Ġritual":10154,"mn":10155,"ĠObs":10156,"akia":10157,"ĠFerr":10158,"Ġrecognised":10159,"Ġunincorporated":10160,"ĠSyria":10161,"01":10162,"Ġmonastery":10163,"Ġsurviv":10164,"Ġmechanical":10165,"Ġstared":10166,"Ġexercise":10167,"ĠCry":10168,"ygen":10169,"Ġgrows":10170,"ephew":10171,"ĠDead":10172,"azing":10173,"Ġshield":10174,"Ġgrav":10175,"ĠKum":10176,"Ġdisappeared":10177,"Ġmac":10178,"Ġaccord":10179,"Ġ;":10180,"Ġguarant":10181,"Ġ1864":10182,"Ġinformed":10183,"irts":10184,"ĠChristians":10185,"Ġdelivery":10186,"Ġfallen":10187,"Ġconfig":10188,"ĠRacing":10189,"ĠBron":10190,"Ġdiscontin":10191,"ĠSC":10192,"ĠStandard":10193,"ĠTun":10194,"ĠCulture":10195,"ĠSection":10196,"Ġlocomotives":10197,"Ġtong":10198,"ĠGuinea":10199,"ĠNation":10200,"Ġorchestra":10201,"ĠTrump":10202,"Ġmanufactured":10203,"Ġconventional":10204,"ĠGrace":10205,"Ġcomed":10206,"Ġfee":10207,"Ġ1861":10208,"ĠCurrently":10209,"Ġalgorith":10210,"stery":10211,"ĠSultan":10212,"def":10213,"ĠBranch":10214,"Ġreduction":10215,"Ġjurisdiction":10216,"Ġkeyboard":10217,"ĠClay":10218,"Ġearthqu":10219,"Ġstuff":10220,"winning":10221,"emble":10222,"Ġconnections":10223,"NS":10224,"Ġphysics":10225,"aja":10226,"onies":10227,"ĠJonathan":10228,"roid":10229,"eton":10230,"Ġdiver":10231,"ĠTurner":10232,"Ġtraditionally":10233,"LS":10234,"care":10235,"Ġdeparted":10236,"Ġproductions":10237,"Ġshifted":10238,"Ġbattalion":10239,"Ġfuneral":10240,"irk":10241,"Ġorganis":10242,"ĠByzant":10243,"Ġerr":10244,"isp":10245,"Ġpromised":10246,"ĠAdelaide":10247,"Ġfulf":10248,"Ġtrials":10249,"ĠNathan":10250,"ĠFrances":10251,"Ġrid":10252,"ĠBroadcasting":10253,"ĠIranian":10254,"Ġkm":10255,"Ġventure":10256,"Ġsettlements":10257,"uru":10258,"eled":10259,"Ġattempting":10260,"oven":10261,"Ġpassion":10262,"Ġphotographs":10263,"Donald":10264,"Ġpromise":10265,"Ġsignificance":10266,"Ġtub":10267,"oned":10268,"Ġdrivers":10269,"Ġbanned":10270,"Ġrespective":10271,"ĠMes":10272,"Ġindustries":10273,"ĠPeninsula":10274,"Ġactivist":10275,"Ġtemperatures":10276,"gate":10277,"Ġplacing":10278,"ĠShel":10279,"Ġhide":10280,"Ġmanufacturer":10281,"Ġstrip":10282,"type":10283,"ĠWang":10284,"Ġboss":10285,"ĠIvan":10286,"ĠJazz":10287,"mits":10288,"trans":10289,"aha":10290,"sa":10291,"ĠIC":10292,"Ġextensively":10293,"izz":10294,"inos":10295,"Ġeligible":10296,"Ġdoubles":10297,"ĠLore":10298,"ĠCA":10299,"Ġidentical":10300,"group":10301,"ĠVel":10302,"ĠMicrosoft":10303,"ĠUniversal":10304,"ierra":10305,"mediate":10306,"Ġcancelled":10307,"ĠCuba":10308,"Ġlayer":10309,"Ġ95":10310,"Ġcondem":10311,"Ġfestivals":10312,"Ġjury":10313,"amese":10314,"ĠGran":10315,"ĠCH":10316,"Ġexcellent":10317,"Ġprices":10318,"Ġpush":10319,"ĠCob":10320,"Ġworn":10321,"ĠOliver":10322,"ĠEug":10323,"ĠWas":10324,"opp":10325,"umps":10326,"ĠTrail":10327,"Ġ1862":10328,"Ġeditions":10329,"ĠPad":10330,"Ġraising":10331,"Ġgenetic":10332,"Ġrebell":10333,"Ġbelongs":10334,"ieth":10335,"Ġconvinced":10336,"Ġtens":10337,"Ġorigins":10338,"04":10339,"Ġnegotiations":10340,"Ġkidn":10341,"Ġnam":10342,"Ġ600":10343,"ĠMales":10344,"Ġpropag":10345,"auge":10346,"Ġstrange":10347,"ishers":10348,"Ġnoise":10349,"Ġefficient":10350,"Ġ1863":10351,"ĠMA":10352,"Ġwider":10353,"Ġoverseas":10354,"Ġphotography":10355,"Ġacceler":10356,"Ġcongress":10357,"Ġsending":10358,"ĠPradesh":10359,"ĠSr":10360,"Just":10361,"ÑĢ":10362,"encer":10363,"Ġpromoting":10364,"ĠMaced":10365,"olia":10366,"Ġpy":10367,"ĠArchbishop":10368,"Ġinfluences":10369,"Ġshirt":10370,"ĠSpirit":10371,"Ġrestricted":10372,"Ġenemies":10373,"Ġtransmit":10374,"Ġoutstanding":10375,"ixon":10376,"ĠVincent":10377,"ĠHope":10378,"Ġatmosphere":10379,"Ġ1887":10380,"Ġnut":10381,"appy":10382,"Ġexplan":10383,"acket":10384,"ĠMonte":10385,"ĠNS":10386,"Ġclinical":10387,"ĠHig":10388,"Ġcave":10389,"When":10390,"Ġwrestling":10391,"ĠDom":10392,"ĠStill":10393,"ortunately":10394,"Christ":10395,"Ġdrum":10396,"ĠSign":10397,"Ġgrabbed":10398,"Gu":10399,"Ġwarning":10400,"two":10401,"Ġties":10402,"family":10403,"ĠCad":10404,"2010":10405,"Ġmanaging":10406,"ĠHudson":10407,"Ġplayoffs":10408,"ĠYears":10409,"Ġkids":10410,"Ġexplains":10411,"Ġlegislative":10412,"Ġflights":10413,"Ġindeed":10414,"ĠAdvent":10415,"Ġju":10416,"bes":10417,"overed":10418,"Ġlibr":10419,"Ġphoto":10420,"ĠKos":10421,"Ġrelie":10422,"ĠBrisb":10423,"Ġuniverse":10424,"Ġimplementation":10425,"Ġexhibited":10426,"Ġconven":10427,"Ġconstitutional":10428,"maker":10429,"alg":10430,"Ġranging":10431,"ĠYouT":10432,"ĠCatherine":10433,"Ġscr":10434,"ĠIce":10435,"ĠJun":10436,"Ġexha":10437,"anim":10438,"othy":10439,"Ġtherm":10440,"Ġcollaps":10441,"ĠBrisbane":10442,"Ġdefended":10443,"etta":10444,"ĠKirk":10445,"Ġdrinking":10446,"ĠNar":10447,"Ġmask":10448,"ĠPeru":10449,"Ġhole":10450,"Ġcinema":10451,"ennial":10452,"ĠAlberta":10453,"Ð½":10454,"elta":10455,"ĠWor":10456,"Ġward":10457,"Ġsuspect":10458,"Ġlinear":10459,"power":10460,"ĠNet":10461,"Ġconversion":10462,"Ġevolved":10463,"was":10464,"Ġwinds":10465,"Î½":10466,"olition":10467,"Ġtag":10468,"ĠElectric":10469,"03":10470,"ortion":10471,"Ġmurdered":10472,"Ġ57":10473,"Ġpreparation":10474,"lett":10475,"ĠCommons":10476,"ĠCinc":10477,"ĠDaily":10478,"ĠEston":10479,"Ġcertainly":10480,"works":10481,"ipper":10482,"Ġreorgan":10483,"Ġinterviews":10484,"Ġarriving":10485,"Ġremote":10486,"Ġdisturb":10487,"uart":10488,"Ġoptions":10489,"ĠJerry":10490,"Ġsteep":10491,"Ġrecalled":10492,"achment":10493,"Ġhills":10494,"pre":10495,"four":10496,"yler":10497,"isting":10498,"Ġexclud":10499,"formerly":10500,"Ġemotional":10501,"orious":10502,"leyball":10503,"Ġaboard":10504,"Å¾":10505,"Ġaccessible":10506,"Ġcoinc":10507,"Ġpupils":10508,"onder":10509,"bled":10510,"Ġbutter":10511,"ĠTak":10512,"Ed":10513,"ĠStudio":10514,"Ġdanger":10515,"ĠFreedom":10516,"Ġacres":10517,"Ġ66":10518,"ĠBarcel":10519,"omic":10520,"ĠHebrew":10521,"Ġrepr":10522,"Ġbases":10523,"Ġuncom":10524,"Ġscores":10525,"Ġwer":10526,"ĠComple":10527,"Ġtons":10528,"Ġslave":10529,"feld":10530,"families":10531,"Ġmoments":10532,"enberg":10533,"ĠPierre":10534,"language":10535,"ulous":10536,"ĠMunich":10537,"ĠProtestant":10538,"Ġtopics":10539,"Ġdemanded":10540,"arrison":10541,"Ġcolleges":10542,"Ġgolden":10543,"Ġcampaigns":10544,"Ġshops":10545,"Ġdistribut":10546,"Ġfasc":10547,"raud":10548,"ĠSad":10549,"ÏĦ":10550,"ĠSprings":10551,"Ġacquisition":10552,"eli":10553,"Ġsuspic":10554,"venth":10555,"free":10556,"Ġparticipating":10557,"iev":10558,"ĠClare":10559,"ĠMasters":10560,"itime":10561,"Ġmoral":10562,"Ġbattery":10563,"Ġcaps":10564,"WA":10565,"ĠBarbara":10566,"ĠWrestling":10567,"Ġgast":10568,"imp":10569,"Ġcanal":10570,"ĠCase":10571,"Ġinternet":10572,"ĠâĤ":10573,"game":10574,"Ġdescribing":10575,"ĠBesides":10576,"ĠCraig":10577,"Ġbiological":10578,"ĠCollins":10579,"issions":10580,"cient":10581,"Ġmainstream":10582,"Ġaffair":10583,"ĠAnglo":10584,"ĠDemocrat":10585,"arus":10586,"Ġcatalog":10587,"ĠLloyd":10588,"Ġdepression":10589,"celand":10590,"ÃŁ":10591,"ĠAthens":10592,"aco":10593,"Ġinherited":10594,"Ġexposure":10595,"eston":10596,"Ġassum":10597,"Ġyard":10598,"Ġneutral":10599,"ĠSocialist":10600,"erior":10601,"Ġswitched":10602,"ĠVas":10603,"ĠCP":10604,"osy":10605,"month":10606,"released":10607,"ĠNav":10608,"Ġ1886":10609,"brid":10610,"fa":10611,"ĠTang":10612,"nda":10613,"ĠFisher":10614,"Ġcontributing":10615,"Ġcruc":10616,"ĠSoccer":10617,"Ġgear":10618,"ĠTu":10619,"innati":10620,"ĠPhilippine":10621,"ĠFact":10622,"Ġenrolled":10623,"Ġprotests":10624,"ĠLate":10625,"atar":10626,"Ġperspective":10627,"ĠNova":10628,"Ġuncertain":10629,"Ġsubsc":10630,"Ġ58":10631,"Ġgal":10632,"ournaments":10633,"ĠYouTube":10634,"Ġspecialized":10635,"ĠLad":10636,"Ġpetition":10637,"ashes":10638,"Ġconvicted":10639,"Ġtip":10640,"ĠPunjab":10641,"elfare":10642,"ĠControl":10643,"Ġproteins":10644,"haw":10645,"Ġfarming":10646,"Ġages":10647,"ĠFab":10648,"aders":10649,"Ġresumed":10650,"ĠMalt":10651,"urst":10652,"aba":10653,"Ġexecution":10654,"ĠSerge":10655,"ĠPant":10656,"Ġtribute":10657,"Ġaqu":10658,"ĠUg":10659,"ĠAlaska":10660,"Ġmeasured":10661,"Ġdemands":10662,"Ġbench":10663,"Ġticket":10664,"Ġtaxes":10665,"racted":10666,"Ġokay":10667,"uez":10668,"vi":10669,"Ġbarely":10670,"Ġinspiration":10671,"scar":10672,"holm":10673,"Ġfriendship":10674,"ĠCoal":10675,"Ġsav":10676,"ĠMind":10677,"ĠLeeds":10678,"ĠDemocrats":10679,"Ġ1881":10680,"Ġbelt":10681,"Ġdatab":10682,"Are":10683,"ĠSymphony":10684,"Ġnephew":10685,"odore":10686,"ĠBulgar":10687,"Ġoutbreak":10688,"ĠBey":10689,"Ġdisch":10690,"Ġlocality":10691,"Ġbull":10692,"Ġheading":10693,"outheastern":10694,"Ġreporter":10695,"Ġfundamental":10696,"ĠLP":10697,"Ġplastic":10698,"ĠRAF":10699,"Ġcorresponding":10700,"Ġnice":10701,"olve":10702,"ĠRef":10703,"Ġ85":10704,"Ġreporting":10705,"Ġshoulders":10706,"ĠCO":10707,"Ġpermitted":10708,"Ġmos":10709,"ĠGlen":10710,"Ġsin":10711,"ĠMunicipality":10712,"Ġvisits":10713,"Ġdecorated":10714,"anche":10715,"ĠBeth":10716,"itis":10717,"Ġ72":10718,"lee":10719,"Mon":10720,"Ġcow":10721,"ĠBarr":10722,"ĠCode":10723,"Ġportrait":10724,"02":10725,"ĠAber":10726,"Ġafford":10727,"Ġarrive":10728,"Ġdiet":10729,"uka":10730,"Ã¨re":10731,"vision":10732,"Ġ1884":10733,"icity":10734,"hent":10735,"ĠBrand":10736,"ouncill":10737,"Ġcooperation":10738,"MI":10739,"Ġ59":10740,"Ġcopper":10741,"Eng":10742,"iya":10743,"ĠVI":10744,"eing":10745,"Ġstomach":10746,"ĠPil":10747,"ĠAlt":10748,"Ġdifficulties":10749,"German":10750,"Ġgraduation":10751,"rane":10752,"Ġbeetle":10753,"Ġcollaborated":10754,"iper":10755,"gments":10756,"oys":10757,"ĠUnd":10758,"Ġresignation":10759,"Ġdesignation":10760,"ĠGard":10761,"Ġhang":10762,"ĠSmall":10763,"Ġvertical":10764,"bus":10765,"Ġpowered":10766,"Ġworse":10767,"Ġcarries":10768,"omon":10769,"Ġsample":10770,"ogle":10771,"Ġdressed":10772,"razy":10773,"Ġca":10774,"ĠCelt":10775,"Ġcertified":10776,"aping":10777,"ĠNorfolk":10778,"ĠFormer":10779,"Ġexclusive":10780,"ĠChristianity":10781,"ĠBarcelona":10782,"Ġcavalry":10783,"ĠTigers":10784,"oric":10785,"Ġinducted":10786,"itarian":10787,"Ġroot":10788,"Ġcolumns":10789,"Ġdifficulty":10790,"ĠColombia":10791,"ĠFif":10792,"essed":10793,"ĠCincinnati":10794,"Ġinterpretation":10795,"issa":10796,"rises":10797,"Ġseriously":10798,"Ġproof":10799,"length":10800,"ĠPhD":10801,"Ġfilming":10802,"Ġreception":10803,"Ġawareness":10804,"Ġreferences":10805,"Ġcyl":10806,"Ġfro":10807,"Ġdistinction":10808,"ĠBuffalo":10809,"ĠTerritory":10810,"ĠSig":10811,"ĠSecret":10812,"ificial":10813,"RI":10814,"ĠChallenge":10815,"Ġintense":10816,"Ġ800":10817,"Ġdepicted":10818,"ĠLag":10819,"ĠHem":10820,"Ġgaze":10821,"ĠAdmiral":10822,"Ġgeomet":10823,"RT":10824,"Ġyourself":10825,"Ġcock":10826,"Ġsimultaneously":10827,"Ġlip":10828,"ĠPictures":10829,"Ġdisb":10830,"ĠLis":10831,"Ġframework":10832,"ĠReport":10833,"Ġalien":10834,"Ġhence":10835,"Ġgallery":10836,"ĠNeg":10837,"Ġfighters":10838,"Ġcompound":10839,"sub":10840,"Ġbell":10841,"ĠCamb":10842,"Ġchallenges":10843,"Ġtargets":10844,"owski":10845,"Hz":10846,"aying":10847,"ĠStars":10848,"ĠWes":10849,"ĠRidge":10850,"ele":10851,"compass":10852,"Ġcontrols":10853,"Ġphrase":10854,"ĠSaints":10855,"ido":10856,"Ġdetect":10857,"ĠObama":10858,"ĠVlad":10859,"Ġinhib":10860,"ĠBobby":10861,"2011":10862,"Ġstick":10863,"Ġstops":10864,"ĠIceland":10865,"Ġcommenced":10866,"Ġqueen":10867,"Ġmerely":10868,"Ġaccompany":10869,"Ġmad":10870,"ĠDakota":10871,"ĠFull":10872,"ĠBlues":10873,"Ġdepartments":10874,"ĠCultural":10875,"Ġagg":10876,"Ġsharing":10877,"Ġangry":10878,"ĠVegas":10879,"Ġvel":10880,"ĠKap":10881,"Ġliked":10882,"ĠShar":10883,"Ġenters":10884,"Ġgrades":10885,"Ġangle":10886,"ĠProvinc":10887,"ĠArmenian":10888,"ĠRoll":10889,"Ġdistinctive":10890,"Ġcapita":10891,"azon":10892,"400":10893,"Ġcir":10894,"ĠSaudi":10895,"Ġ().":10896,"front":10897,"Ġintercept":10898,"Ġreceives":10899,"Ġwaves":10900,"Ġeasier":10901,"aters":10902,"avid":10903,"ĠTerry":10904,"ĠSpeed":10905,"ĠSystems":10906,"ĠHamb":10907,"Yeah":10908,"Ġinstruction":10909,"Ġrelevant":10910,"Ġsequel":10911,"Ġsummit":10912,"ĠRogers":10913,"Ġlingu":10914,"ĠMaybe":10915,"Ġmaps":10916,"ĠMom":10917,"igo":10918,"ĠGate":10919,"Ġwritings":10920,"Ġrelegated":10921,"Ġpseud":10922,"Ġ1882":10923,"RO":10924,"ĠBak":10925,"Ġupset":10926,"ĠTech":10927,"Ġtea":10928,"ĠBorough":10929,"Ġtears":10930,"berry":10931,"osoph":10932,"Ġprepare":10933,"ĠMS":10934,"ĠBuddhist":10935,"Ġambass":10936,"ĠBright":10937,"nan":10938,"ipping":10939,"2007":10940,"Ġrevers":10941,"adition":10942,"2008":10943,"Ġski":10944,"Ġautomatic":10945,"Ġmini":10946,"Ġsket":10947,"Ġinhab":10948,"rain":10949,"sterdam":10950,"ĠMunicipal":10951,"Ġbone":10952,"arted":10953,"William":10954,"ĠAction":10955,"Ġdeeply":10956,"Ġcrosses":10957,"ĠConfederate":10958,"Ġbreast":10959,"rez":10960,"Ġhistorians":10961,"alan":10962,"ĠNapole":10963,"Ġsilence":10964,"Best":10965,"ĠDigital":10966,"ĠSoph":10967,"Ġcoins":10968,"Ġpeoples":10969,"Ġsung":10970,"ĠUrban":10971,"rets":10972,"ĠNevada":10973,"ĠAdvis":10974,"Ġmilk":10975,"ĠRot":10976,"Ãª":10977,"Ġcutting":10978,"Ġhyper":10979,"Ġdramatic":10980,"Ġpressed":10981,"ĠPerry":10982,"ointed":10983,"ropod":10984,"olves":10985,"Ġfinance":10986,"Ġfeels":10987,"raits":10988,"Ġresid":10989,"ĠAlban":10990,"Î¿":10991,"Ġconsolid":10992,"Ġgentle":10993,"ĠJefferson":10994,"achi":10995,"ĠRing":10996,"eps":10997,"ĠDiocese":10998,"Ġusage":10999,"ĠProfessional":11000,"osexual":11001,"Ġemphasis":11002,"Ġelabor":11003,"ospel":11004,"ĠSnow":11005,"onda":11006,"Ġcharacteristic":11007,"Ġobjective":11008,"ĠRhod":11009,"Ġfabric":11010,"ĠDenver":11011,"eras":11012,"child":11013,"ĠHelen":11014,"Ġtorped":11015,"Ġentreprene":11016,"ĠDiam":11017,"ÈĻ":11018,"Ġ99":11019,"irms":11020,"ĠBlock":11021,"Ġquarterback":11022,"ĠStorm":11023,"alam":11024,"Ġphysician":11025,"?âĢĻ":11026,"ĠYang":11027,"Ġdeemed":11028,"Ġbachelor":11029,"Ġrhythm":11030,"ĠRal":11031,"Black":11032,"oons":11033,"ĠBath":11034,"ĠMinor":11035,"ĠRac":11036,"Ġsoph":11037,"athon":11038,"vol":11039,"Ġlady":11040,"ĠMult":11041,"ĠAntar":11042,"Ġreward":11043,"Ġsubmarine":11044,"ĠLiving":11045,"garian":11046,"ospitals":11047,"ĠCircuit":11048,"Ġencompass":11049,"ivic":11050,"Ġsad":11051,"Ġcarrier":11052,"ĠComics":11053,"ĠArgentine":11054,"ĠIndustrial":11055,"Ġprol":11056,"Ġrecovery":11057,"Ġzero":11058,"Ġtournaments":11059,"ĠRu":11060,"Ġreducing":11061,"Ġrelax":11062,"Ġspeaker":11063,"Ġcomprises":11064,"ĠKeith":11065,"ĠLen":11066,"FF":11067,"Ġrestaurants":11068,"orp":11069,"ĠSah":11070,"HA":11071,"Ġdancing":11072,"Ġneuro":11073,"Ñģ":11074,"Ġtenth":11075,"Ġcleared":11076,"Ġbehavi":11077,"ĠPlant":11078,"Ġlock":11079,"forced":11080,"2009":11081,"unny":11082,"Ġvaluable":11083,"Ġash":11084,"vet":11085,"ghai":11086,"Ġpairs":11087,"Ġcomparison":11088,"ĠQual":11089,"ĠSurvey":11090,"BO":11091,"Ġmail":11092,"afe":11093,"Ġsymptoms":11094,"Ġsupplied":11095,"ĠJa":11096,"Ġtongue":11097,"ĠNepal":11098,"Ġtested":11099,"Ġforcing":11100,"Ġlegislature":11101,"ĠClassic":11102,"Ġattendance":11103,"enos":11104,"Ġattacking":11105,"ĠSony":11106,"disc":11107,"Ġessentially":11108,"ĠChi":11109,"ĠMaz":11110,"ĠNewcastle":11111,"Ġdogs":11112,"ĠCold":11113,"Ġcoup":11114,"Ġerror":11115,"imir":11116,"Ġorn":11117,"Ġindicating":11118,"Ġamounts":11119,"ĠHugh":11120,"ĠRobin":11121,"Ġtechnologies":11122,"ĠGround":11123,"Ġelementary":11124,"Ġmamm":11125,"Ġspots":11126,"oro":11127,"Ġunn":11128,"Ġcollapse":11129,"ĠBert":11130,"Ġtalks":11131,"itic":11132,"Ġnarrative":11133,"ĠBlood":11134,"ĠCS":11135,"ĠPay":11136,"ĠCurt":11137,"Ġpromin":11138,"Ġnearest":11139,"Ġcompiled":11140,"Ġdrums":11141,"Ġtraveling":11142,"Ġdiplomatic":11143,"Ġanticip":11144,"Ġtruly":11145,"ĠJoy":11146,"Ġpartial":11147,"Ġaside":11148,"lington":11149,"ĠDrive":11150,"acles":11151,"ĠChester":11152,"Ġtu":11153,"Ġinterchange":11154,"ĠMonday":11155,"Ġclan":11156,"Ġpredecessor":11157,"velt":11158,"Ġgardens":11159,"five":11160,"Ġdesert":11161,"Ġpoison":11162,"pop":11163,"Ġcoached":11164,"ĠNext":11165,"ĠTag":11166,"Ġtourist":11167,"Ġscen":11168,"Ġdisbanded":11169,"stitutional":11170,"Ġenforcement":11171,"Ġministry":11172,"Ġ1883":11173,"Ġvamp":11174,"ycl":11175,"Ġflank":11176,"Ġoverw":11177,"ĠModel":11178,"raska":11179,"ogg":11180,"written":11181,"Ġflex":11182,"ĠKenya":11183,"Par":11184,"Ġguards":11185,"iffs":11186,"icked":11187,"Ġjail":11188,"ĠCompet":11189,"Ġhonors":11190,"new":11191,"ouch":11192,"ocent":11193,"ovich":11194,"ĠGabriel":11195,"ĠFran":11196,"ĠEsc":11197,"Ġabilities":11198,"ttp":11199,"Ġles":11200,"cia":11201,"Ġendors":11202,"eric":11203,"Ã¦":11204,"ĠInsp":11205,"ĠLions":11206,"alling":11207,"Ġsiege":11208,"Ġassists":11209,"Ġapproaches":11210,"Dec":11211,"ansk":11212,"ĠFaculty":11213,"song":11214,"ĠMagn":11215,"elia":11216,"rav":11217,"rency":11218,"ĠRivers":11219,"Ġbrigade":11220,"ĠIndustry":11221,"ĠFem":11222,"Ġreflected":11223,"iko":11224,"Ġdisaster":11225,"ĠPack":11226,"Ġscre":11227,"ĠAzerbaijan":11228,"Ġclar":11229,"Ġ1876":11230,"Ġhorn":11231,"Ġdescendants":11232,"ĠSusan":11233,"Ġworry":11234,"Ġthank":11235,"Ġoutdoor":11236,"ĠCN":11237,"Ġbonus":11238,"ĠStre":11239,"viously":11240,"ilia":11241,"Ġtemporarily":11242,"enia":11243,"Ġannex":11244,"2006":11245,"Ġgif":11246,"Ġrecipient":11247,"ishops":11248,"Ġdissolved":11249,"ĠSic":11250,"ĠHom":11251,"hor":11252,"Ġpredict":11253,"Ġ1871":11254,"Ġordinary":11255,"Ġpharm":11256,"ĠElement":11257,"ĠHarbor":11258,"wings":11259,"Ġ62":11260,"Ġburning":11261,"Ġexit":11262,"Ġgap":11263,"Ġbats":11264,"Ġdiseases":11265,"ĠAmsterdam":11266,"ĠHolland":11267,"EN":11268,"Ġwake":11269,"aws":11270,"ablished":11271,"Ġremoval":11272,"To":11273,"Ġwidow":11274,"ificate":11275,"keley":11276,"ĠWarsaw":11277,"iji":11278,"Ġorganic":11279,"empl":11280,"izer":11281,"Ġafraid":11282,"Ġvariable":11283,"ĠOm":11284,"ĠPolicy":11285,"Ġhorizon":11286,"ĠNevertheless":11287,"Ġvolunteers":11288,"wig":11289,"rod":11290,"ĠKath":11291,"à®":11292,"Ġorange":11293,"rible":11294,"Ġcomments":11295,"ĠWed":11296,"Ġcitizen":11297,"ĠBot":11298,"Ġexperiments":11299,"ĠCroatia":11300,"ĠEthiop":11301,"avor":11302,"Ġprev":11303,"etary":11304,"ĠSean":11305,"ĠMend":11306,"Ġanger":11307,"Ġextinct":11308,"ĠMadison":11309,"Ġpitched":11310,"Ġglanced":11311,"ĠBased":11312,"Ġeconomics":11313,"okes":11314,"Ġtum":11315,"Ġarrives":11316,"Ġmidfielder":11317,"lia":11318,"Ġmonthly":11319,"helm":11320,"Ġrolled":11321,"atus":11322,"ĠExper":11323,"ĠMoroc":11324,"cester":11325,"ĠHob":11326,"Ġhoping":11327,"ĠBuch":11328,"ourt":11329,"Jan":11330,"ĠEdwards":11331,"ĠSalt":11332,"ĠHistorical":11333,"Ġreferring":11334,"Ġvulner":11335,"employ":11336,"Ġdealing":11337,"ĠWoman":11338,"ĠMurphy":11339,"ullivan":11340,"Ġalternate":11341,"Ġcomprehensive":11342,"Ġ\"[":11343,"Ġrifle":11344,"ampa":11345,"Ġtravels":11346,"ĠCinem":11347,"2005":11348,"Ġsemif":11349,"ĠAaron":11350,"anni":11351,"oving":11352,"Ġtheories":11353,"ĠCameron":11354,"Ġdeliber":11355,"Ġbuses":11356,"ĠSide":11357,"ĠKay":11358,"Ġmyster":11359,"his":11360,"zyme":11361,"Ġconnects":11362,"Ġimprovements":11363,"Ġrecognize":11364,"Ġregul":11365,"ĠBrew":11366,"Ġstudios":11367,"ĠLock":11368,"ĠPetersburg":11369,"Ġ63":11370,"Ġkilometers":11371,"ĠShaw":11372,"ĠPS":11373,"log":11374,"Ġspeakers":11375,"Ġexplicit":11376,"ĠHitler":11377,"week":11378,"Ġconsistent":11379,"Ġgran":11380,"ĠSongs":11381,"imensional":11382,"gom":11383,"âĢĿ,":11384,"Ġfailing":11385,"Ġdelayed":11386,"Ġjew":11387,"ĠBav":11388,"Ġtox":11389,"enburg":11390,"pow":11391,"Ġruler":11392,"Ġnickname":11393,"Ġbusy":11394,"Ġconsidering":11395,"ĠCov":11396,"Ġprox":11397,"Ġrecur":11398,"Ġpian":11399,"Ġfeud":11400,"Ġcollective":11401,"Ġghost":11402,"Ġcorps":11403,"ĠCosta":11404,"Ġleaned":11405,"Ġ1840":11406,"ĠYale":11407,"Ġincumbent":11408,"Ġmanip":11409,"Ġscope":11410,"Ġoxygen":11411,"wer":11412,"Ġknee":11413,"Ġmasc":11414,"Ġdesper":11415,"idad":11416,"cat":11417,"itated":11418,"ĠSteven":11419,"ĠBald":11420,"ĠVideo":11421,"ĠEmma":11422,"Ġlogo":11423,"eyer":11424,"Ġcoaches":11425,"Ġ1878":11426,"EP":11427,"Ġflour":11428,"Ġbeaten":11429,"ĠTon":11430,"Ġbrings":11431,"Ġtherapy":11432,"Ġhind":11433,"ĠRight":11434,"Ġregister":11435,"ĠGot":11436,"ĠPolitical":11437,"Ġundergraduate":11438,"ttps":11439,"itary":11440,"Ġreaders":11441,"ĠLion":11442,"ĠNeil":11443,"ĠIT":11444,"rection":11445,"Ġbankrupt":11446,"iast":11447,"Ġhistorically":11448,"Ġmoon":11449,"ser":11450,"stown":11451,"Ġclosure":11452,"Ġcraft":11453,"Ġcomputers":11454,"Ġcorruption":11455,"ffield":11456,"Ġpink":11457,"Ġpermit":11458,"Who":11459,"ĠNebraska":11460,"otion":11461,"Ġstake":11462,"ĠStuart":11463,"abe":11464,"Ġelevated":11465,"Ġaffiliate":11466,"Ġvoy":11467,"levard":11468,"Ġprince":11469,"Ġprocedure":11470,"Ġfrustr":11471,"Ġfiring":11472,"ĠAthletics":11473,"ĠPic":11474,"Ġskill":11475,"ĠGiants":11476,"Ġprosecut":11477,"\"'":11478,"ĠMann":11479,"Ġtours":11480,"formance":11481,"ĠPlayers":11482,"Ġfiles":11483,"ĠVenice":11484,"ĠDid":11485,"Ġnamely":11486,"Ġborrow":11487,"icular":11488,"Ġembr":11489,"lain":11490,"anj":11491,"inded":11492,"ourg":11493,"Ġnest":11494,"peare":11495,"Ġnat":11496,"Ġchrom":11497,"bie":11498,"Ġfairly":11499,"2012":11500,"Ġchallenged":11501,"Ġrecruited":11502,"Ġretain":11503,"Ġlifetime":11504,"Ġvocalist":11505,"Ġovert":11506,"Ġverse":11507,"Ġvariant":11508,"Ġpayment":11509,"Ġsuspected":11510,"Ġchoir":11511,"Ġcalm":11512,"ĠAlger":11513,"Ġgrap":11514,"ĠSierra":11515,"Ġexhibitions":11516,"Ġexhibit":11517,"Ġbreeding":11518,"Ġdism":11519,"aft":11520,"ĠGhana":11521,"ĠSP":11522,"ĠAnglic":11523,"DF":11524,"Ġveteran":11525,"Ġ\"(":11526,"Ġwaited":11527,"Ġlift":11528,"ĠTechnical":11529,"Ġthirteen":11530,"ĠâĤ¬":11531,"Ġdict":11532,"Ġ\"\".":11533,"Ġstruggled":11534,"acking":11535,"ampton":11536,"Ġwound":11537,"Ġ1867":11538,"Me":11539,"Ġposts":11540,"ĠAbraham":11541,"akespeare":11542,"ĠPrinc":11543,"ĠYe":11544,"ĠMahar":11545,"ĠChapel":11546,"Ġconsumption":11547,"Ġstronger":11548,"osevelt":11549,"Ġorganisations":11550,"Ġseeds":11551,"ĠPont":11552,"Ġsituations":11553,"Ġadministered":11554,"Ġparks":11555,"Ġthereby":11556,"Ġcontracts":11557,"etr":11558,"ĠFlorence":11559,"Ġsolutions":11560,"Ġorchest":11561,"Ġholiday":11562,"Ġcounsel":11563,"include":11564,"ĠGregory":11565,"ĠAbu":11566,"Ġcasualties":11567,"urated":11568,"Ġ1872":11569,"Ġradar":11570,"ĠLan":11571,"ĠTas":11572,"ĠLarry":11573,"Ġaccum":11574,"Ġallies":11575,"held":11576,"Ġcolleagues":11577,"oker":11578,"oustic":11579,"Ġabolished":11580,"Ġclient":11581,"Ġsignals":11582,"ĠOrd":11583,"ĠGonz":11584,"Ġcurric":11585,"Ġratings":11586,"uis":11587,"agger":11588,"Ġ1875":11589,"ĠLuis":11590,"ĠWithout":11591,"Ġ61":11592,"core":11593,"ĠOttawa":11594,"Ġaddressed":11595,"Ġresort":11596,"ĠBund":11597,"Ġbars":11598,"Ġdying":11599,"ancial":11600,"Love":11601,"ĠBulgarian":11602,"ĠLiga":11603,"Ġflower":11604,"ĠCampaign":11605,"Ġconsumer":11606,"word":11607,"agons":11608,"Ġpole":11609,"Ġcelebration":11610,"ĠZe":11611,"anta":11612,"Ġrice":11613,"Ġlaboratory":11614,"ĠEight":11615,"Ġbridges":11616,"Ġloop":11617,"Ġwhispered":11618,"through":11619,"ĠHerbert":11620,"agonist":11621,"ften":11622,"Ġplease":11623,"ĠLebanon":11624,"Ġsovere":11625,"Ġinstallation":11626,"ĠIP":11627,"Ġris":11628,"ĠBulgaria":11629,"Ġperceived":11630,"iscopal":11631,"Ġ1879":11632,"Ġhypothes":11633,"Ġtaste":11634,"Ġ98":11635,"Ġclients":11636,"ĠVers":11637,"ĠPearl":11638,"inus":11639,"ubs":11640,"Ġscientist":11641,"yright":11642,"Ġshorter":11643,"Ġfocusing":11644,"Ġcabin":11645,"redited":11646,"ĠLear":11647,"Ġsteal":11648,"Ġ68":11649,"ĠSoul":11650,"Ġadjust":11651,"Ġblank":11652,"Ġtransp":11653,"ĠLucas":11654,"Ġconfidence":11655,"Geor":11656,"ĠFu":11657,"ĠKrist":11658,"Ġcalendar":11659,"Ġaims":11660,"arts":11661,"iffer":11662,"ĠSyrian":11663,"regular":11664,"ĠSz":11665,"ĠUlt":11666,"omed":11667,"EL":11668,"Ġaccurate":11669,"Ã¶n":11670,"Ġpatent":11671,"ĠEddie":11672,"ĠGay":11673,"rimination":11674,"lease":11675,"Ġinfl":11676,"Ġorbit":11677,"kov":11678,"ĠHerman":11679,"Ġ76":11680,"urse":11681,"ĠHav":11682,"Ġimprisoned":11683,"Ġprevented":11684,"expected":11685,"isons":11686,"ĠDelaware":11687,"Ġempire":11688,",âĢĻ":11689,"ĠDennis":11690,"amics":11691,"Ġinteraction":11692,"Ġprofile":11693,"ĠFormula":11694,"ĠSupport":11695,"Ġcarefully":11696,"Ġfantasy":11697,"ĠEy":11698,"Ġbeer":11699,"Ġaccommodate":11700,"Ġdocumented":11701,"Ġtape":11702,"ĠRoosevelt":11703,"Ġsupplement":11704,"Ġcompositions":11705,"original":11706,"CD":11707,"Ġstones":11708,"Ġgrandson":11709,"inf":11710,"Ġarena":11711,"sts":11712,"ÑĤ":11713,"ĠType":11714,"Ġachievement":11715,"Ġ96":11716,"Ġextending":11717,"ĠMul":11718,"Ġeating":11719,"Ġ67":11720,"list":11721,"Ġfuck":11722,"Ġprogrammes":11723,"ĠTed":11724,"asm":11725,"Ġ82":11726,"Ġaggregate":11727,"Ġreveal":11728,"Ġfourteen":11729,"Ġsixteen":11730,"Ġstored":11731,"ĠHenri":11732,"Ġgaining":11733,"ĠCroatian":11734,"ĠKate":11735,"Ġmixture":11736,"ĠJake":11737,"ĠFilip":11738,"Ġmaintaining":11739,"ĠExchange":11740,"chief":11741,"Ġactively":11742,"ĠTibet":11743,"duces":11744,"lane":11745,"onlyinclude":11746,"Ġ1866":11747,"Ġbacked":11748,"ĠMol":11749,"nÃ©e":11750,"ĠRat":11751,"Ġshots":11752,"lights":11753,"oka":11754,"Ġgenerations":11755,"Ġpeer":11756,"unning":11757,"Big":11758,"Ġ1868":11759,"Ġpredominantly":11760,"Ġquad":11761,"Ġtelephone":11762,"ĠPin":11763,"Ġchemistry":11764,"itting":11765,"Ġabund":11766,"\"|":11767,"Ġpoliticians":11768,"Ġtoler":11769,"ĠâĢ¦":11770,"ĠMalay":11771,"Ġlung":11772,"made":11773,"Ġfib":11774,"Ġreforms":11775,"ĠHughes":11776,"Ġmemor":11777,"Ġprisoner":11778,"Ġlandmark":11779,"ĠBerkeley":11780,"Ġrenowned":11781,"Ġneighboring":11782,"Ġexch":11783,"Ġá":11784,"Ġfame":11785,"Ġarchaeological":11786,"Ġguys":11787,"ĠProduction":11788,"anti":11789,"Ġsid":11790,"Ġbehaviour":11791,"Ġprestigious":11792,"...\"":11793,"Ġconcur":11794,"Ġstructural":11795,"Ġlakes":11796,"Ġpregnant":11797,"itro":11798,"Ġ1874":11799,"ĠEsp":11800,"Ġfunctional":11801,"post":11802,"Ġtube":11803,"ĠNote":11804,"join":11805,"ĠSuz":11806,"ĠOpp":11807,"ĠCoach":11808,"ĠCond":11809,"ĠOil":11810,"Ġfootage":11811,"Ġpersonally":11812,"ĠHeavy":11813,"Ġtomb":11814,"Ġ1873":11815,"Ġtiny":11816,"Ġsurrender":11817,"ĠRange":11818,"quis":11819,"Ġclosest":11820,"Ġbasin":11821,"Ġbin":11822,"itudes":11823,"ĠShanghai":11824,"Ġdefender":11825,"Ġguid":11826,"ĠGoogle":11827,"ĠHamburg":11828,"Ġsustained":11829,"Ġretiring":11830,"Ġargues":11831,"Ġmainland":11832,"Ġconcepts":11833,"pine":11834,"ĠPedro":11835,"ĠGam":11836,"Ġviolin":11837,"âĢ¦âĢĿ":11838,"Ġgymn":11839,"1990":11840,"Ġathletic":11841,"ĠFa":11842,"ĠByzantine":11843,"ĠGuild":11844,"Ġalign":11845,"Ġrever":11846,"Ġbroadcasts":11847,"Ġunw":11848,"ĠPast":11849,"Ġspac":11850,"Ġrabb":11851,"ĠGrammy":11852,"ĠLeo":11853,"Ġartificial":11854,"Ġhardware":11855,"wright":11856,"ĠBeginning":11857,"ĠWellington":11858,"Ġciting":11859,"à¥":11860,"Ġearthquake":11861,"ĠSheffield":11862,"uckland":11863,"ĠSÃ£o":11864,"Ġdozen":11865,"ĠTreas":11866,"Ġcontribute":11867,"ĠVenezuela":11868,"Ant":11869,"Ġleather":11870,"Ġpap":11871,"Ġdestination":11872,"orge":11873,"ĠLux":11874,"Ġerup":11875,"ĠIndependence":11876,"Ġcrops":11877,"ĠPel":11878,"ĠRou":11879,"rus":11880,"white":11881,"ÂłÂ°":11882,"Ġreass":11883,"boat":11884,"istent":11885,"Ġrevised":11886,"Ġpackage":11887,"ĠFinance":11888,"Ġprayer":11889,"ĠTwenty":11890,"Ġstatements":11891,"Ġgenes":11892,"ĠButler":11893,"Ġbarr":11894,"piece":11895,"ĠGuardian":11896,"ĠGilbert":11897,"fecture":11898,"ĠMath":11899,"Ġairline":11900,"Ġcathedral":11901,"Ġacademy":11902,"writing":11903,"Ġfastest":11904,"ĠHunt":11905,"Ġshed":11906,"Ġimprovement":11907,"Ġvariation":11908,"ĠAx":11909,"Ġfewer":11910,"ĠSoft":11911,"cht":11912,"mail":11913,"pic":11914,"ĠStanford":11915,"Ġextends":11916,"ĠShakespeare":11917,"Ġengagement":11918,"Ġsuspension":11919,"ĠDanny":11920,"ĠYam":11921,"isan":11922,"Ġdivorce":11923,"Ġculmin":11924,"Ġenzyme":11925,"Ġlegit":11926,"Com":11927,"Ġcultures":11928,"ĠHorse":11929,"ĠSoutheast":11930,"ĠTommy":11931,"Ġemployee":11932,"Ġworker":11933,"Ġslight":11934,"Ġ1877":11935,"ults":11936,"Ġhaven":11937,"sor":11938,"Ġfate":11939,"inery":11940,"ocal":11941,"Ġengage":11942,"Ġvictories":11943,"ĠDoc":11944,"caster":11945,"Ġpreserve":11946,"Ġefficiency":11947,"Ġrepeatedly":11948,"ĠRace":11949,"Ġboards":11950,"ĠOri":11951,"Ġreluct":11952,"Ġbarrel":11953,"oj":11954,"CS":11955,"Ġshout":11956,"Station":11957,"acco":11958,"ussia":11959,"Ġconfusion":11960,"Ġrealize":11961,"ĠAmbass":11962,"Ġlocomotive":11963,"ĠLanguage":11964,"Ġroster":11965,"Ġvirtual":11966,"amation":11967,"hin":11968,"ĠMTV":11969,"Ġspokes":11970,"artered":11971,"ĠOperations":11972,"Ġreservoir":11973,"ĠSebast":11974,"asia":11975,"orient":11976,"ĠSomers":11977,"Ġinvestigate":11978,"agram":11979,"ĠWallace":11980,"2004":11981,"ĠWells":11982,"ĠMig":11983,"ĠRalph":11984,"Ġ69":11985,"Ġprinting":11986,"Ġliv":11987,"Ġbreaks":11988,"ĠMarx":11989,"Ġmoll":11990,"ĠProtection":11991,"Ġtourism":11992,"ĠProductions":11993,"ĠLaura":11994,"Ġdisplays":11995,"Ġconcentrated":11996,"inted":11997,"Ġbeam":11998,"Ã¼n":11999,"second":12000,"Ġpaying":12001,"Ġpocket":12002,"Ġfraud":12003,"Ġgest":12004,"Ġlocked":12005,"Ġsmart":12006,"lined":12007,"align":12008,"Ġreverse":12009,"Ġknocked":12010,"ĠColleg":12011,"Ġcolonies":12012,"ĠRav":12013,"liminary":12014,"aho":12015,"ĠWatson":12016,"Ġbacking":12017,"igation":12018,"ĠAlbums":12019,"ĠMills":12020,"omas":12021,"arrior":12022,"Where":12023,"ĠCork":12024,"gie":12025,"ĠBass":12026,"Ġ88":12027,"team":12028,"Ġaviation":12029,"Ġthrown":12030,"Ġcuts":12031,"ĠBird":12032,"ĠScar":12033,"Ġgauge":12034,"Go":12035,"Ġcounterpart":12036,"Ġmotorcy":12037,"Ġfollowers":12038,"ĠOcc":12039,"Ġscream":12040,"ĠManuel":12041,"imm":12042,"Ġadventure":12043,"namese":12044,"ĠToy":12045,"gebra":12046,"Ġ1848":12047,"ĠEagles":12048,"Ġpresents":12049,"ĠHarold":12050,"ĠAuckland":12051,"uced":12052,"Ġhook":12053,"ĠNashville":12054,"Ġqualification":12055,"Ġsamples":12056,"áº":12057,"ĠCou":12058,"ĠYugoslavia":12059,"Ġequation":12060,"Ġshipping":12061,"dist":12062,"Ġglac":12063,"Ġtrem":12064,"Ġbadly":12065,"ĠNewton":12066,"Ġpilots":12067,"Ġtouchdowns":12068,"izard":12069,"Ġpace":12070,"Ġbrew":12071,"ĠPrimary":12072,"tegr":12073,"ĠRachel":12074,"Ġunderwent":12075,"Ġdiscontinued":12076,"Ġtissue":12077,"onial":12078,"Ġexamination":12079,"hall":12080,"Ġdialect":12081,"ieg":12082,"ĪĴ":12083,"minster":12084,"Ġaltitude":12085,"ifier":12086,"ridor":12087,"rary":12088,"speaking":12089,"Te":12090,"Ġbrow":12091,"ĠCruz":12092,"ĠSut":12093,"South":12094,"Ð¾Ð":12095,"2013":12096,"ĠPrest":12097,"Ġgirlfriend":12098,"Ġmessages":12099,"Ġpioneer":12100,"Ġdisorder":12101,"ĠAmy":12102,"Nov":12103,"cott":12104,"avian":12105,"Ġredes":12106,"VP":12107,"Ġleagues":12108,"Ġindependently":12109,"ĠTow":12110,"ĠJerem":12111,"ĠPut":12112,"Ġdrain":12113,"Ġdri":12114,"gomery":12115,"Ġvenues":12116,"Ġblog":12117,"Ġinstitute":12118,"Ġencourage":12119,"Ġcotton":12120,"Ġportions":12121,"ĠMethodist":12122,"ĠTerm":12123,"August":12124,"ĠBened":12125,"ĠNy":12126,"ĠSay":12127,"Ġtasks":12128,"Ġtheatrical":12129,"tar":12130,"Ġinject":12131,"Ġdiscovers":12132,"Ġ77":12133,"ĠThai":12134,"reated":12135,"ĠJoint":12136,"Ġmanages":12137,"Ġrelating":12138,"comp":12139,"Ġmemories":12140,"lived":12141,"Ġstationed":12142,"Ġimpressed":12143,"Ġencountered":12144,"Ġbombing":12145,"ĠPalestine":12146,"ĠGust":12147,"Ġrefugees":12148,"atha":12149,"Ġvow":12150,"essa":12151,"ĠExam":12152,"ĠWu":12153,"fr":12154,"Ġ78":12155,"Ġcelebrate":12156,"Mr":12157,"Ġdust":12158,"ĠDelta":12159,"holders":12160,"Ġstolen":12161,"Ġtent":12162,"Ġplates":12163,"Ġdialogue":12164,"Ġeventual":12165,"oi":12166,"oan":12167,"ĠPra":12168,"ĠPrague":12169,"icken":12170,"ĠIntelligence":12171,"ints":12172,"Ġcommitment":12173,"umbled":12174,"Ġprivile":12175,"Ġupdated":12176,"ĠYu":12177,"ĠRhodes":12178,"ĠJar":12179,"Ġreleasing":12180,"Ġdece":12181,"Ġsheep":12182,"ugged":12183,"Ġforb":12184,"Ġmoderate":12185,"isch":12186,"Ġconflic":12187,"ĠMontana":12188,"Ġrunners":12189,"ĠTrav":12190,"Ġphosph":12191,"illes":12192,"ĠEld":12193,"Ġhospitals":12194,"Ġlux":12195,"Ġpermanently":12196,"ĠJunction":12197,"Ġseized":12198,"Ġ1869":12199,"erness":12200,"dal":12201,"ÄŁ":12202,"iability":12203,"Ġ73":12204,"Ġsuccession":12205,"founded":12206,"Ġsciences":12207,"Ġconfron":12208,"ĠGw":12209,"Ġimpressive":12210,"Ġexperts":12211,"ĠIraqi":12212,"ĠIsaac":12213,"Ġwished":12214,"eness":12215,"Ġshelter":12216,"Ġtriple":12217,"Ġcogn":12218,"Ġ1830":12219,"ĠLucy":12220,"ĠPalmer":12221,"Ġbeliefs":12222,"ĠKil":12223,"Ang":12224,"central":12225,"rific":12226,"ĠPul":12227,"ĠChes":12228,"sized":12229,"ĠMut":12230,"ĠBent":12231,"teries":12232,"axy":12233,"Ġmuscle":12234,"ĠMD":12235,"ĠMcM":12236,"ĠMust":12237,"Ġenact":12238,"Ġseverely":12239,"ĠSecondary":12240,"ĠMoz":12241,"Ġelite":12242,"enne":12243,"Ġpunk":12244,"Ġprogressive":12245,"Ġliteracy":12246,"ĠBond":12247,"Ġobservation":12248,"Ġranges":12249,"ju":12250,"via":12251,"Ġannouncement":12252,"Ġmissile":12253,"ĠArnold":12254,"ĠBog":12255,"IM":12256,"Ġcreates":12257,"Ġbears":12258,"Ġ2020":12259,"ĠUsing":12260,"Ġorb":12261,"entieth":12262,"ĠElementary":12263,"Ġ97":12264,"lend":12265,"Ġsegments":12266,"Ġpleasure":12267,"roe":12268,"agi":12269,"Ġautomatically":12270,"Ġrenewed":12271,"ups":12272,"BE":12273,"ucks":12274,"Ġradiation":12275,"Ġtransformed":12276,"ĠInterstate":12277,"Ġfluid":12278,"link":12279,"ĠBeh":12280,"Ġvirus":12281,"count":12282,"ĠVermont":12283,"ĠPhillips":12284,"CP":12285,"ahan":12286,"Ġnumbered":12287,"ĠHaz":12288,"opol":12289,"rage":12290,"Ġstairs":12291,"ĠHat":12292,"Ġsheet":12293,"umer":12294,"umph":12295,"istration":12296,"iens":12297,"Ġregulation":12298,"Ġmaintains":12299,"Ġattitude":12300,"Ġ74":12301,"ĠObl":12302,"Ġbord":12303,"uns":12304,"Ġhandling":12305,"Ġrequiring":12306,"Ġmaid":12307,"Ġadmit":12308,"handed":12309,"Ġhref":12310,"ĠJoan":12311,"Ġremix":12312,"eto":12313,"Ġproperly":12314,"Ġsurvival":12315,"Ġpunishment":12316,"Ġsmoke":12317,"Î¹":12318,"></":12319,"Ġfreight":12320,"Ġclay":12321,"ĠCommerce":12322,"Ġlunch":12323,"Ġlighting":12324,"rolled":12325,"ĠHarvey":12326,"Ġfloors":12327,"Ġtel":12328,"ĠÅł":12329,"arvae":12330,"ĠAviation":12331,"ĠTodd":12332,"Ġdependent":12333,"Ġrevival":12334,"sup":12335,"umbai":12336,"ĠCollection":12337,"Ġcustomer":12338,"Ġrocket":12339,"ĠChase":12340,"speed":12341,"Ø§":12342,"beat":12343,"ĠPerth":12344,"ambers":12345,"ĠMontgomery":12346,"ĠCDP":12347,"Ġuniversal":12348,"Ġadvertis":12349,"gi":12350,"Ġimmigration":12351,"Ġarrangements":12352,"aurus":12353,"addy":12354,"><":12355,"itches":12356,"entry":12357,"rowned":12358,"Ġorient":12359,"ĠWinn":12360,"Ġpsychology":12361,"Ġmirror":12362,"ĠAcadem":12363,"Ġcad":12364,"ĠContemporary":12365,"Ġsque":12366,"____":12367,"Ã©r":12368,"Ġkings":12369,"Ġabb":12370,"Ġartwork":12371,"Ġapolog":12372,"opened":12373,"arta":12374,"alin":12375,"Ġthorough":12376,"Ġoverwhel":12377,"Ġrebellion":12378,"Ġambassador":12379,"ĠPrice":12380,"cur":12381,"ĠAnglican":12382,"ĠFacebook":12383,"2001":12384,"ĠNature":12385,"ĠMarcus":12386,"ĠIndies":12387,"Ġhopes":12388,"Ġcommunist":12389,"Ġmagnetic":12390,"ĠPav":12391,"ĠTyler":12392,"adows":12393,"Ġdistant":12394,"ĠKerala":12395,"atra":12396,"ĠHus":12397,"Ġpatri":12398,"Ġforget":12399,"Ġobsc":12400,"Sch":12401,"ĠCrime":12402,"ĠStarting":12403,"ĠJin":12404,"ĠTransportation":12405,"Ġprofessionals":12406,"ĠSask":12407,"ĠJustin":12408,"ĠRepresentative":12409,"ĠSwan":12410,"Ġathlete":12411,"Ġowns":12412,"Ġdevast":12413,"ahl":12414,"ĠJen":12415,"Ġdevelopments":12416,"Ġpitcher":12417,"Ġvaried":12418,"Ġfortress":12419,"BL":12420,"Ġsignature":12421,"ĠKash":12422,"Ġdiesel":12423,"cz":12424,"omber":12425,"ĠBoulevard":12426,"Ġanx":12427,"ĠStef":12428,"Ġunexpected":12429,"kar":12430,"ĠJulian":12431,"ĠEconomics":12432,"Ġmanufacturers":12433,"aukee":12434,"Per":12435,"ĠLA":12436,"ĠNorthwest":12437,"Ġunanim":12438,"ĠMap":12439,"Red":12440,"Ġfung":12441,"ĠÃģ":12442,"ĠConservation":12443,"Ġstretch":12444,"ĠCreat":12445,"Ġreviewed":12446,"azed":12447,"Sw":12448,"Ġmartial":12449,"Ġwrapped":12450,"Ġconstantly":12451,"ĠOscar":12452,"Ġanyway":12453,"ded":12454,"quer":12455,"Ġpraise":12456,"Ġceiling":12457,"rien":12458,"Ġillustrated":12459,"Ġgri":12460,"Ġcoc":12461,"whe":12462,"Ġphotographer":12463,"March":12464,"Ġphotos":12465,"ullah":12466,"ĠNAS":12467,"ĠFam":12468,"ĠRailways":12469,"airo":12470,"Ġsomewhere":12471,"var":12472,"Ġswing":12473,"Ġbread":12474,"Ġsacrif":12475,"Ġnomine":12476,"books":12477,"ĠSak":12478,"Ġcream":12479,"Ġescort":12480,"inda":12481,"ĠLov":12482,"ĠValent":12483,"Ġmit":12484,"Ġbedroom":12485,"Ġgraphics":12486,"lesh":12487,"ĠVietnamese":12488,"isha":12489,"Ġ71":12490,"Ġentr":12491,"Ġcongregation":12492,"Ġweaken":12493,"tingham":12494,"Ġconfront":12495,"Ġ1800":12496,"atta":12497,"ĠSpencer":12498,"Ġhappens":12499,"ĠKle":12500,"itol":12501,"gov":12502,"Ġmemb":12503,"Ġreserves":12504,"Ġrestrictions":12505,"Ġvolunteer":12506,"umni":12507,"Ã±a":12508,"ĠHein":12509,"Ġresource":12510,"Ġtut":12511,"Ġenabled":12512,"ittees":12513,"ĠPros":12514,"ĠCeltic":12515,"ĠArc":12516,"Ġvariations":12517,"Now":12518,"600":12519,"bin":12520,"Ġoptim":12521,"azi":12522,"ĠVern":12523,"ĠOg":12524,"arms":12525,"ilian":12526,"2003":12527,"Ġstriking":12528,"Ġeditorial":12529,"Mad":12530,"ipher":12531,"nal":12532,"ĠErnest":12533,"Ã¡s":12534,"Ġpresentation":12535,"ĠRevival":12536,"Ġreferend":12537,"Ġconvert":12538,"inated":12539,"quiry":12540,"ĠLeader":12541,"pense":12542,"ighting":12543,"Ġguidance":12544,"Ġallegedly":12545,"Ġintervention":12546,"first":12547,"makers":12548,"ĠDeep":12549,"Ġtram":12550,"vy":12551,"Ġseparation":12552,"Ġoccasional":12553,"Ġworried":12554,"ĠGrove":12555,"Ġsocieties":12556,"istani":12557,"ĠComputer":12558,"Ġrequirement":12559,"Co":12560,"Ġtributary":12561,"Ġcirculation":12562,"ĠStakes":12563,"thal":12564,"liga":12565,"ĠGothic":12566,"ometown":12567,"Ġhem":12568,"Ġjumped":12569,"Ġcriteria":12570,"LP":12571,"ĠLead":12572,"Ġinvented":12573,"ĠGas":12574,"ĠVilla":12575,"Ġupcoming":12576,"Ġcarved":12577,"Car":12578,"Ġpounds":12579,"ĠReed":12580,"ĠLog":12581,"Ġinterface":12582,"tn":12583,"Ġhiding":12584,"inae":12585,"ĠPanama":12586,"Ġsits":12587,"Ġconce":12588,"ĠManager":12589,"Ġrelatives":12590,"ĠCardinal":12591,"ĠSor":12592,"Ġcivilians":12593,"ĠDol":12594,"world":12595,"ĠCec":12596,"Ġshaped":12597,"oko":12598,"inite":12599,"ĠPlayStation":12600,"Ġmall":12601,"auer":12602,"Ġsurvivors":12603,"ĠIng":12604,"swick":12605,"ĠRah":12606,"Ġdeals":12607,"Ġprovisions":12608,"UC":12609,"Ġstatistics":12610,"Ġhonored":12611,"ĠAnim":12612,"ĠSof":12613,"ĠBach":12614,"ĠGra":12615,"Ġexterior":12616,"Ġanimation":12617,"Ġdrunk":12618,"ĠLisa":12619,"Ġordained":12620,"ĠAer":12621,"Ġmetropolitan":12622,"Ġhes":12623,"Ġol":12624,"Ġanywhere":12625,"ĠSha":12626,"ĠExpl":12627,"Ġcentres":12628,"ĠRams":12629,"ĠVent":12630,"overy":12631,"Ġaltered":12632,"Ġsimilarly":12633,"ĠCabinet":12634,"byter":12635,"ĠBennett":12636,"Ġnervous":12637,"Ġexile":12638,"ĠPon":12639,"Ġshrug":12640,"Int":12641,"Ġmorph":12642,"ussion":12643,"zed":12644,"Ġjet":12645,"Ġgrants":12646,"Ġfier":12647,"Ġproceeded":12648,"%),":12649,"Ġaudiences":12650,"ÅĤaw":12651,"ĠSudan":12652,"ĠArabia":12653,"ountain":12654,"pin":12655,"ĠChang":12656,"ignated":12657,"ĠRuth":12658,"ema":12659,"yers":12660,"Ġargue":12661,"apur":12662,"Ġkills":12663,"Ġanthrop":12664,"Ġwreck":12665,"Ġvoices":12666,"Ġpriests":12667,"ĠExped":12668,"itus":12669,"waukee":12670,"umberland":12671,"Ġloose":12672,"sed":12673,"Ġexplanation":12674,"Ġgoverning":12675,"Ġblend":12676,"Ġwidth":12677,"Ġmoist":12678,"mill":12679,"Ġdoctors":12680,"ĠAmbassador":12681,"ĠBear":12682,"Ġneighbouring":12683,"ĠRoom":12684,"lining":12685,"Ġmolecular":12686,"ateral":12687,"ubb":12688,"lected":12689,"ĠEssex":12690,"Ġcollapsed":12691,"Ġhybrid":12692,"uros":12693,"ĠStein":12694,"Ġdarkness":12695,"asted":12696,"GM":12697,"ĠMidd":12698,"ĠEC":12699,"Ġadvocate":12700,"Ġfavourite":12701,"Ġsuggesting":12702,"ĠKrish":12703,"Ġliver":12704,"Ġ1857":12705,"UN":12706,"aca":12707,"ultural":12708,"Ġexport":12709,"ds":12710,"Ġaccomplished":12711,"Ġrevenge":12712,"Ġ92":12713,"Ġpreparing":12714,"Ġsoap":12715,"ĠCraw":12716,"Music":12717,"Ġtrio":12718,"tz":12719,"had":12720,"Ġprocedures":12721,"ĠDog":12722,"ĠRaymond":12723,"orr":12724,"Ġpursued":12725,"ĠHigher":12726,"2002":12727,"took":12728,"Ġdatabase":12729,"half":12730,"ĠSlav":12731,"sche":12732,"Ġpulling":12733,"bek":12734,"Ġcataly":12735,"Ġsongwriter":12736,"Ġattraction":12737,"Ġgray":12738,"Ġtoll":12739,"Ġtransit":12740,"Ġliterally":12741,"ĠIndonesian":12742,"Ġlistening":12743,"Ġacknowledged":12744,"Ġcanon":12745,"Ġfurniture":12746,"Ġelectro":12747,"Ġdispers":12748,"borg":12749,"Ġrivals":12750,"Ġmanual":12751,"oints":12752,"Ġrestore":12753,"eda":12754,"ĠRenaissance":12755,"Ġfisher":12756,"nut":12757,"ĠDays":12758,"Ġbearing":12759,"Ġvital":12760,"Ġimproving":12761,"ĠMumbai":12762,"ĠBlake":12763,"ĠSyn":12764,"fol":12765,"Ġcartoon":12766,"Ġlobby":12767,"Ġexplosion":12768,"ĠRus":12769,"ĠGener":12770,"Ġvaries":12771,"Ġprototype":12772,"Ġspecialist":12773,"Ġignored":12774,"Ġcrick":12775,"sur":12776,"Ġsoci":12777,"Ġkinds":12778,"oshi":12779,"Ġcreature":12780,"Ġib":12781,"Ġvibr":12782,"ĠShir":12783,"Ġstroke":12784,"ĠClarke":12785,"boro":12786,"iu":12787,"Ġautobi":12788,"ellation":12789,"Ġpracticed":12790,"Ġbold":12791,"harm":12792,"selling":12793,"ĠYet":12794,"ĠRif":12795,"Ġfo":12796,"ĠSaskat":12797,"omo":12798,"ĠFlow":12799,"iche":12800,"Ġcust":12801,".<":12802,"Ġpotentially":12803,"Ġequally":12804,"EM":12805,"Ġscar":12806,"ĠOwen":12807,"inyl":12808,"boys":12809,"Ġ1859":12810,"Ġpump":12811,"Ġquoted":12812,"Ġbore":12813,"Ġports":12814,"Ġautumn":12815,"Ġlawsuit":12816,"Ġprey":12817,"ĠGy":12818,"ĠCe":12819,"Ġstreams":12820,"Ġprivately":12821,"Ġthreats":12822,"Ġsymmet":12823,"ĠSomerset":12824,"ĠFat":12825,"King":12826,"2014":12827,"gral":12828,"Ġrepublic":12829,"Ġassessment":12830,"ĠDod":12831,"ĠHD":12832,"Ġrecruit":12833,"2015":12834,"Ġblues":12835,"ĠTradition":12836,"Ġrebels":12837,"ĠEmily":12838,"Ġnoting":12839,"haus":12840,"Ġcomplement":12841,"icia":12842,"iao":12843,"hop":12844,"ĠPerson":12845,"Ġconjunction":12846,"ĠAgriculture":12847,"Ġenlisted":12848,"Ġintegration":12849,"Euro":12850,"ĠStudent":12851,"quet":12852,"Time":12853,"ĠGand":12854,"ĠFoster":12855,"ĠDragon":12856,"ĠAirlines":12857,"Ġdiversity":12858,"ĠGuide":12859,"uba":12860,"Ġdivorced":12861,"ĠPete":12862,"senal":12863,"Ġevident":12864,"pol":12865,"ĠDaw":12866,"rys":12867,"ĠPlat":12868,"ĠGolf":12869,"ĠBM":12870,"Ġconspir":12871,"ĠColumbus":12872,"ĠChan":12873,"Ġhanging":12874,"ĠJava":12875,"Ġfract":12876,"Ġwheels":12877,"Ġcompat":12878,"erving":12879,"Ġinscription":12880,"Ġinsisted":12881,"hibition":12882,"munition":12883,"ĠSF":12884,"atoes":12885,"avier":12886,"ategory":12887,"Ġauthorized":12888,"ĠPalestinian":12889,"ormal":12890,"arded":12891,"World":12892,"Ġferry":12893,"Ġtouched":12894,"ĠReading":12895,"Ġinhabited":12896,"ayers":12897,"ĠEnvironmental":12898,"ĠScout":12899,"Ġministers":12900,"Ġtension":12901,"adier":12902,"ĠLeices":12903,"Ġbicy":12904,"ente":12905,"East":12906,"Ġexpanding":12907,"avery":12908,"Ġampl":12909,"ĠApart":12910,"Ġreceiver":12911,"three":12912,"Ġtract":12913,"ĠLamb":12914,"Ġcurriculum":12915,"ĠTong":12916,"Ġknife":12917,"ait":12918,"Ġclergy":12919,"Ġstoryline":12920,"asan":12921,"Ġgathering":12922,"Ġhitting":12923,"ĠArmed":12924,"ĠMarvel":12925,"Ġfindings":12926,"forming":12927,"ounted":12928,"Ġtravelling":12929,"nav":12930,"ĠWalt":12931,"ĠFriends":12932,"Ġdubbed":12933,"ovan":12934,"ĠLeonard":12935,"Ġhometown":12936,"Ġopens":12937,"Ġshallow":12938,"Ġfarms":12939,"Ġquestioned":12940,"Ġlessons":12941,"ailing":12942,"ĠAltern":12943,"Ġoperators":12944,"ĠArtillery":12945,"Ġburial":12946,"Ġspan":12947,"Ġpsychological":12948,"Ã©l":12949,"Ġtopic":12950,"Ġow":12951,"Ġtargeted":12952,"herent":12953,"tering":12954,"ĠStockholm":12955,"ections":12956,"Ġtables":12957,"Ġbinding":12958,"ĠLex":12959,"furt":12960,"Ġsingers":12961,"Ġnationwide":12962,"Ġexplore":12963,"Ġengineers":12964,"imen":12965,"ĠERA":12966,"arten":12967,"Ġbones":12968,"Ġjournals":12969,"Ġmatrix":12970,"ĠFinancial":12971,"Ġfounders":12972,"osophical":12973,"ĠTasman":12974,"1980":12975,"Ġha":12976,"Ġthesis":12977,"Ġconductor":12978,"800":12979,"ĠLot":12980,"Ġcommentary":12981,"Ġridge":12982,"page":12983,"enesis":12984,"Ġstair":12985,"Ġdelay":12986,"ctuary":12987,"Ġtonight":12988,"Ġinfer":12989,"ĠBrah":12990,"tershire":12991,"cos":12992,"Ġheadquartered":12993,"Ġregardless":12994,"umi":12995,"ags":12996,"Ġarmies":12997,"ĠWorkers":12998,"Ġhelicopter":12999,"Ġscattered":13000,"ĠAires":13001,"Ġminimal":13002,"Ġscandal":13003,"Ġaest":13004,"Ġwondered":13005,"ĠLak":13006,"Ġemerging":13007,"Ġcircular":13008,"Ġshadow":13009,"Ġnominations":13010,"ĠPent":13011,"habilit":13012,"ĠSullivan":13013,"Ġstaying":13014,"ucker":13015,"ĠKun":13016,"Ġindoor":13017,"Ġenable":13018,"Ġ93":13019,"tes":13020,"Ġentity":13021,"ĠMcL":13022,"ĠLink":13023,"Ġallegations":13024,"Ġbreed":13025,"Ġpublish":13026,"Ġlectures":13027,"ĠWals":13028,"ĠMagic":13029,"Ġdecrease":13030,"ĠSchol":13031,"Ġemotion":13032,"Ġinterrupted":13033,"ĠLess":13034,"orne":13035,"ĠJamaica":13036,"Ġvolunt":13037,"ĠLiu":13038,"ĠTall":13039,"TP":13040,"ĠWag":13041,"Ġauction":13042,"Ġpanels":13043,"ounce":13044,"ĠWald":13045,"ĠDiamond":13046,"ulsion":13047,"mans":13048,"omorph":13049,"iblings":13050,"Ġskull":13051,"you":13052,"apest":13053,"Ġtier":13054,"ĠNine":13055,"pher":13056,"uto":13057,"ĠSex":13058,"ĠKol":13059,"rox":13060,"Ġinstructions":13061,"ãģ":13062,"Ġbanking":13063,"Ġtemples":13064,"ĠRevolutionary":13065,"Ġnationally":13066,"ĠGeorgian":13067,"onso":13068,"imo":13069,"Ġperpet":13070,"ĠKab":13071,"ollo":13072,"ĠOakland":13073,"Ġsighed":13074,"Ġmood":13075,"omi":13076,"ĠMathemat":13077,"National":13078,"Ġcomfortable":13079,"umble":13080,"Ġservant":13081,"Ġgarrison":13082,"GO":13083,"Ġsew":13084,"ĠFlight":13085,"rified":13086,"Ġtackles":13087,"ulture":13088,"Ġquarters":13089,"Ġbulk":13090,"ĠOw":13091,"ĠCox":13092,"ĠProvincial":13093,"VA":13094,"ĠKnights":13095,"uting":13096,"atorial":13097,"Men":13098,"ango":13099,"ĠBA":13100,"Ġmansion":13101,"Ġaren":13102,"ĠLiterature":13103,"ĠBuc":13104,"Ġinfection":13105,"Ġconflicts":13106,"Ġruins":13107,"Ġlarvae":13108,"Ġwarfare":13109,"Ġing":13110,"Ġproportion":13111,"ĠBuddh":13112,"Ġgods":13113,"Ġdiocese":13114,"onnie":13115,"ĠInv":13116,"tor":13117,"brook":13118,"ĠManila":13119,"ĠFBI":13120,"Ġ81":13121,"Ġmutual":13122,"Ġartif":13123,"Ġbowl":13124,"Ġgrid":13125,"ĠFourth":13126,"ĠSussex":13127,"Ġcomprising":13128,"Ġrevolutionary":13129,"Ġinvolve":13130,"oslov":13131,"chair":13132,"ĠReturn":13133,"ĠOtto":13134,"Ġtowers":13135,"Ġware":13136,"Ġconducting":13137,"legraph":13138,"Ġanymore":13139,"ĠJulia":13140,"Ġmentions":13141,"Rober":13142,"Ġassociations":13143,"Ġinvestors":13144,"Âłkg":13145,"ĠSul":13146,"ĠRaf":13147,"Ġtransported":13148,"pling":13149,"ĠFranÃ§":13150,"adian":13151,"ĠCand":13152,"ĠDin":13153,"Pe":13154,"Ġpianist":13155,"ĠBrunswick":13156,"immer":13157,"Ġcodice":13158,"Ġbullet":13159,"Ġassembled":13160,"Ġirregular":13161,"Ġphenomenon":13162,"backs":13163,"Ġchapters":13164,"Ġparticles":13165,"Ġears":13166,"Ġtired":13167,"intendo":13168,"Ġcomprom":13169,"Ġsurrend":13170,"ashire":13171,"Ġrede":13172,"Ġabsolute":13173,"acular":13174,"ĠPod":13175,"Ġreferendum":13176,"ĠMoreover":13177,"IR":13178,"Ġbatting":13179,"Ġjournalists":13180,"Ġalph":13181,"ĠAncient":13182,"Ġconsultant":13183,"Ġintensity":13184,"Ġdreams":13185,"ocity":13186,"enhagen":13187,"Ġadopt":13188,"ĠLeft":13189,"ĠDevon":13190,"Ġtopped":13191,"shore":13192,"ĠForum":13193,"Ġvolleyball":13194,"isle":13195,"ĠYellow":13196,"ĠLegion":13197,"ĠFish":13198,"Ġconfirm":13199,"bet":13200,"Ġdemocracy":13201,"Ġrolling":13202,"Ġfru":13203,"ĠAnti":13204,"ilo":13205,"ĠImm":13206,"Ġsailing":13207,"Ġintermediate":13208,"ecraft":13209,"Ġ1854":13210,"adal":13211,"Ġgrandmother":13212,"ĠEve":13213,"ĠLegend":13214,"Ġinches":13215,"Ġvirtually":13216,"Ġ87":13217,"ĠEff":13218,"ĠWestminster":13219,"ĠRut":13220,"Ġrelay":13221,"ĠFul":13222,"Ġspecimens":13223,"Ġsearching":13224,"Mal":13225,"ĠBros":13226,"ĠRaid":13227,"mid":13228,"DE":13229,"Ġsolely":13230,"ĠWilhelm":13231,"ĠTrent":13232,"upid":13233,"Ġarbit":13234,"ĠNancy":13235,"ĠBosnia":13236,"Ġstreak":13237,"Ġstaged":13238,"Ġintend":13239,"ĠLakes":13240,"Ġactivists":13241,"holder":13242,"Ġdenomin":13243,"Ġsoutheastern":13244,"Ġweren":13245,"built":13246,"ĠNottingham":13247,"ĠAj":13248,"oding":13249,"Ġbuff":13250,"Ãī":13251,"Ġgoalkeeper":13252,"Ġov":13253,"ĠLiberty":13254,"sl":13255,"ĠKur":13256,"Ġduration":13257,"ĠBuenos":13258,"Ġblocked":13259,"ĠNASA":13260,"ĠCR":13261,"ĠLem":13262,"amped":13263,"San":13264,"Ġconsec":13265,"cano":13266,"ĠSO":13267,"Ġlayers":13268,"Ġgenerate":13269,"Ġconferences":13270,"Ġhydrogen":13271,"ĠAmazon":13272,"Ġstability":13273,"uate":13274,"Ġwickets":13275,"Ġdiscrimination":13276,"orey":13277,"Aust":13278,"rugu":13279,"Ġcouncill":13280,"Ġ1855":13281,"âĢľ":13282,"Ġupgraded":13283,"ĠDy":13284,"ĠSuff":13285,"ĠWednes":13286,"umm":13287,"ĠUnf":13288,"pring":13289,"imination":13290,"Ġ79":13291,"James":13292,"ounters":13293,"Ġapprent":13294,"Ag":13295,"Ġpin":13296,"Ġhaz":13297,"Ġconsent":13298,"Ġhandled":13299,"Ġhier":13300,"ĠAges":13301,"Ġacoustic":13302,"quarters":13303,"pit":13304,"vironments":13305,"Ġmarch":13306,"ĠVII":13307,"Ġvarying":13308,"Ġnights":13309,"ĠMcD":13310,"Ġeighteen":13311,"ugu":13312,"Ġwithdrawn":13313,"GBT":13314,"ĠHous":13315,"Ġprompted":13316,"Ġrational":13317,"elly":13318,"ĠBour":13319,"Ġcitizenship":13320,"ĠMotors":13321,"itious":13322,"ĠTriple":13323,"Ġhate":13324,"Ġnineteenth":13325,"ittle":13326,"ĠLancashire":13327,"ĠHeights":13328,"Ġobser":13329,"hl":13330,"Ġhull":13331,"Ġ101":13332,"Ġedges":13333,"Ġraw":13334,"Ġdepends":13335,"Ġcricketer":13336,"ĠEdition":13337,"angered":13338,"ĠDurham":13339,"Ġidentification":13340,"died":13341,"ĠFriedrich":13342,"Ġconsequences":13343,"Ġmild":13344,"ĠCongo":13345,"inguished":13346,"ĠTunis":13347,"cul":13348,"atories":13349,"ĠExpedition":13350,"Ġmemoir":13351,"ĠMilwaukee":13352,"Ġkicked":13353,"ĠWeekly":13354,"oop":13355,"ĠEagle":13356,"Ġrounded":13357,"Bar":13358,"Ġabsent":13359,"Ġinspect":13360,"ĠMiguel":13361,"Ġgoverned":13362,"Ġstuck":13363,"illiant":13364,"ĠIndianapolis":13365,"ĠLouise":13366,"Ġ700":13367,"veloped":13368,"iago":13369,"ĠDest":13370,"Fr":13371,"Ġstro":13372,"Ġphysically":13373,"Ġdesired":13374,"Ġ84":13375,"anthrop":13376,"green":13377,"ĠSerie":13378,"Ġlearns":13379,"ĠEllen":13380,"Ġdeposits":13381,"Em":13382,"ĠMull":13383,"species":13384,"Ġcott":13385,"Ġunve":13386,"ĠAhmed":13387,"Ġderiv":13388,"Ġacquire":13389,"Ġestates":13390,"Ġdisappear":13391,"Ġdish":13392,"hou":13393,"vor":13394,"Ġessay":13395,"Ġsecular":13396,"ĠJak":13397,"ĠWool":13398,"Ġammunition":13399,"bery":13400,"Ġ110":13401,"Ġconsequence":13402,"Ġfirms":13403,"Ġdirections":13404,"ĠJur":13405,"Ġperformers":13406,"Ġproud":13407,"ĠTax":13408,"quest":13409,"Ġsupporter":13410,"alysis":13411,"Ġtestim":13412,"Ġintroduce":13413,"Ġoral":13414,"Ġwoods":13415,"ussels":13416,"Ġquantum":13417,"Ġreads":13418,"Ġcomics":13419,"Ġpreliminary":13420,"ĠEdmund":13421,"ĠWriting":13422,"oting":13423,"sing":13424,"direct":13425,"Ġcurve":13426,"Ġhealthy":13427,"Ġalgorithm":13428,"ĠNapoleon":13429,"ĠMorning":13430,"Ġrushed":13431,"dimensional":13432,"ĠNewport":13433,"Conn":13434,"250":13435,"Ġairfield":13436,"ĠSey":13437,"Ġ89":13438,"stage":13439,"Ġconvey":13440,"ĠJamie":13441,"Ġterrain":13442,"ĠRan":13443,"Ġwanting":13444,"uador":13445,"ĠPresbyter":13446,"ĠHeath":13447,"Ġsounded":13448,"eu":13449,"ordinary":13450,"ĠStrateg":13451,"Ġpolar":13452,"Ġic":13453,"kan":13454,"tage":13455,"ĠLaboratory":13456,"ĠTir":13457,"Ġonwards":13458,"ĠBeing":13459,"Ġintens":13460,"Ġbapt":13461,"ĠPi":13462,"Ġ1858":13463,"iatric":13464,"Ġsuffer":13465,"Ġneighb":13466,"Ġlibraries":13467,"ĠHIV":13468,"ĠChronic":13469,"Ġflooding":13470,"Ġchore":13471,"ĠFilms":13472,"ĠGardens":13473,"Ġtrips":13474,"ĠQuarter":13475,"intendent":13476,"Ġcompetitors":13477,"Ġimpression":13478,"ĠRovers":13479,"ĠCircle":13480,"Ġsyndrome":13481,"Ġabsorbed":13482,"hev":13483,"Ġdrawings":13484,"sal":13485,"Ġsumm":13486,"Ġmonarch":13487,"ĠChelsea":13488,"ĠKyle":13489,"Ġneighbourhood":13490,"Ġgastropod":13491,"Ġnortheastern":13492,"just":13493,"grand":13494,"hal":13495,"Ġwalks":13496,"ĠCornwall":13497,"Ġ86":13498,"Ġdefine":13499,"ĠFro":13500,"athi":13501,"ictions":13502,"Ġspotted":13503,"ĠMoh":13504,"last":13505,"Ġsiblings":13506,"Ġune":13507,"building":13508,"ĠLar":13509,"ethel":13510,"ichael":13511,"Ġdistinguish":13512,"Ġtourists":13513,"ĠPakistani":13514,"ĠPage":13515,"Ġtotally":13516,"Ġtrick":13517,"Ġber":13518,"Ġ91":13519,"ĠGlou":13520,"ĠKid":13521,"Family":13522,"Ġ1856":13523,"ichi":13524,"Ġnaturally":13525,"DI":13526,"eca":13527,"Ġlineup":13528,"south":13529,"Ġwelfare":13530,"ĠGang":13531,"Ġunemploy":13532,"ĠStevens":13533,"Ġinterpreted":13534,"zig":13535,"ĠSimilarly":13536,"Ġenorm":13537,"ĠCuban":13538,"Ġtransformation":13539,"Ġwarned":13540,"Ġrainfall":13541,"ĠIsle":13542,"ĠFranco":13543,"Ġcens":13544,"Ġtorpedo":13545,"Ġtalked":13546,"Ġbiography":13547,"Ġreserved":13548,"sted":13549,"ĠSox":13550,"Ġconfiguration":13551,"ĠLords":13552,"Ġintegral":13553,"utely":13554,"founder":13555,"ĠAub":13556,"NT":13557,"iology":13558,"Ġanime":13559,"Ġdeclar":13560,"ellers":13561,"Ġcro":13562,"Ġanchor":13563,"Ġkiller":13564,"qual":13565,"Ġ94":13566,"rate":13567,"Ġemotions":13568,"Ġassignment":13569,"ĠNC":13570,"Ġsear":13571,"Ġfarmer":13572,"ĠMik":13573,"Ġhoney":13574,"ĠOutstanding":13575,"ĠAA":13576,"ĠESP":13577,"ĠFerdin":13578,"Ġtale":13579,"Ġdoctorate":13580,"HF":13581,"Ġhomosexual":13582,"Ġachievements":13583,"ĠDame":13584,"ĠVolunte":13585,"Ġintr":13586,"insky":13587,"ĠArtist":13588,"azar":13589,"Ġcriticised":13590,"Ġpremier":13591,"Ġsensitive":13592,"Ġsleeping":13593,"ovsky":13594,"Ġauthent":13595,"Ġremn":13596,"Ġgraphic":13597,"Ġjudicial":13598,"Ġvariants":13599,"ĠDrake":13600,"ĠFig":13601,"Ġstyl":13602,"Ġthrowing":13603,"Ġcompensation":13604,"ĠPain":13605,"ĠNak":13606,"ĠCant":13607,"ĠKor":13608,"eme":13609,"ĠOthers":13610,"elong":13611,"ĠStri":13612,"ĠAlbanian":13613,"uania":13614,"Ġcompact":13615,"Ġweigh":13616,"ĠKas":13617,"Ġfool":13618,"terbury":13619,"LB":13620,"Sec":13621,"Ġoccurring":13622,"June":13623,"Cent":13624,"Ġscrap":13625,"ĠLok":13626,"Ġinsects":13627,"math":13628,"Ġthinks":13629,"isi":13630,"ĠRice":13631,"Ġbarn":13632,"Ġgram":13633,"Ġcolours":13634,"Ġbutt":13635,"ĠLiv":13636,"Ġgreet":13637,"Ġnecessarily":13638,"Ac":13639,"ĠCzechoslov":13640,"Ġbypass":13641,"ĠCypr":13642,"Ġpaus":13643,"arrass":13644,"Ġrally":13645,"Ġbottle":13646,"PP":13647,"Ġcompounds":13648,"ĠNintendo":13649,"Ġalumin":13650,"Ġmate":13651,"official":13652,"ĠOS":13653,"osophy":13654,"Ġ1851":13655,"iliary":13656,"(\"":13657,"ĠPorts":13658,"both":13659,"iscal":13660,"ĠScotia":13661,"phis":13662,"RL":13663,"ĠKill":13664,"ĠPand":13665,"Ġdemocratic":13666,"Ïģ":13667,"izations":13668,"GS":13669,"Ġplanted":13670,"USA":13671,"Ġschem":13672,"Ġtheology":13673,"ĠPerformance":13674,"onal":13675,"agic":13676,"ĠArticle":13677,"Ġsequences":13678,"onde":13679,"Ġrook":13680,"Ġconsiderably":13681,"ologically":13682,"rish":13683,"Ġtun":13684,"py":13685,"Ġdoctrine":13686,"ĠShin":13687,"Ġcorporation":13688,"Ġfees":13689,"Ġmetab":13690,"ĠCopenhagen":13691,"ĠCrow":13692,"ĠMold":13693,"screen":13694,"dem":13695,"Ġcommanding":13696,"Ġbigger":13697,"Ġgates":13698,"Ġcreek":13699,"ĠMaurice":13700,"Ġharsh":13701,"ĠBag":13702,"iden":13703,"Ġbout":13704,"Ġspite":13705,"Ġimposed":13706,"Ġgrain":13707,"ĠGeoff":13708,"ĠBelarus":13709,"Ġsacred":13710,"ymph":13711,"woman":13712,"produced":13713,"Ġlegendary":13714,"Ġshoes":13715,"Ġmistake":13716,"Ġacclaimed":13717,"Ġoct":13718,"Ġrefuses":13719,"wind":13720,"ĠDrama":13721,"ĠManit":13722,"ĠFuture":13723,"ĠKi":13724,"Ġholes":13725,"Ġmigration":13726,"ĠCF":13727,"aque":13728,"amy":13729,"ĠPrivate":13730,"ĠSubsequently":13731,"ĠRelations":13732,"Ġtreas":13733,"ĠPep":13734,"Ġadvised":13735,"Ġreactions":13736,"ĠCompan":13737,"ding":13738,"ĠEss":13739,"Ġcollecting":13740,"usters":13741,"Ġmillions":13742,"Ġmanor":13743,"Ġswall":13744,"á¹":13745,"1999":13746,"vas":13747,"ĠDuc":13748,"Ġbassist":13749,"Ġarray":13750,"ĠWatch":13751,"North":13752,"ĠFaith":13753,"ĠContinental":13754,"Ġunions":13755,"Ġcentered":13756,"ĠArmstrong":13757,"July":13758,"Ġenvironments":13759,"ĠRonald":13760,"iffe":13761,"alties":13762,"Ġworkshops":13763,"ÅĽ":13764,"ĠOblast":13765,"ĠEcuador":13766,"Ġicon":13767,"ĠCut":13768,"ĠMead":13769,"ilion":13770,"alymp":13771,"hyll":13772,"Ġcosm":13773,"Come":13774,"ĠData":13775,"Ġcapabilities":13776,"Ġpuzz":13777,"Ġobservations":13778,"Ġcig":13779,"Ġvector":13780,"ĠRhode":13781,"ĠLogan":13782,"ĠThurs":13783,"ĠJacques":13784,"Ġhosting":13785,"imensions":13786,"ĠHolmes":13787,"ĠBelf":13788,"ĠKarn":13789,"Ġbasement":13790,"acional":13791,"Ġsporting":13792,"Ġprecip":13793,"Ġaster":13794,"Ġairing":13795,"etheless":13796,"Ġvarieties":13797,"Ġrushing":13798,"Ġgarn":13799,"prises":13800,"ĠPaulo":13801,"Ġdiscipline":13802,"Ġdevelopers":13803,"Ġ83":13804,"ĠGiov":13805,"ĠLodge":13806,"ilda":13807,"Ġuncon":13808,"Ġvoyage":13809,"stall":13810,"Ġitem":13811,"eping":13812,"GC":13813,"ĠEmmy":13814,"ĠSite":13815,"Ġkilometres":13816,"ĠOber":13817,"Ġfolded":13818,"Hey":13819,"Ġmysterious":13820,"Paul":13821,"Ġhyd":13822,"Ġcompanion":13823,"Ġcircles":13824,"Ġquietly":13825,"hend":13826,"Ġsteady":13827,"Ġdeveloper":13828,"Ġseal":13829,"Cap":13830,"Ġoutcome":13831,"Ġsymbols":13832,"Ġhect":13833,"illon":13834,"ĠTab":13835,"Ġpier":13836,"plete":13837,"ĠTat":13838,"Ġcreatures":13839,"ĠNg":13840,"ĠDavies":13841,"Ġsurfaces":13842,"ĠXV":13843,"talions":13844,"ĠEis":13845,"ĠBrussels":13846,"Ġmilitia":13847,"ĠRush":13848,"Ġvulnerable":13849,"ĠRaw":13850,"ĠChad":13851,"ĠDale":13852,"eting":13853,"bank":13854,"April":13855,"ĠCyr":13856,"Ġspecified":13857,"ĠView":13858,"ĠUrugu":13859,"ĠTrack":13860,"Ġglad":13861,"ocene":13862,"ĠCred":13863,"English":13864,"ĠPhot":13865,"ĠReid":13866,"Ġmystery":13867,"esar":13868,"Ġgently":13869,"Ġmud":13870,"Ġmanufacture":13871,"offs":13872,"Ġpoorly":13873,"ĠFranz":13874,"edge":13875,"ophone":13876,"Ġvegetation":13877,"uchy":13878,"press":13879,"ĠArtists":13880,"OT":13881,"ĠBrooks":13882,"ĠCC":13883,"ĠCardinals":13884,"Ġterritorial":13885,"Ġinnovative":13886,"ĠRoth":13887,"ĠBark":13888,"Every":13889,"ĠBenedict":13890,"Ġdad":13891,"uin":13892,"Ġslavery":13893,"rams":13894,"olith":13895,"ĠAdvisory":13896,"Ġaggressive":13897,"Ġdisagre":13898,"Ġlecturer":13899,"Ġassume":13900,"atem":13901,"Ġrape":13902,"ĠMam":13903,"Ġriders":13904,"ĠZhang":13905,"Ġjournalism":13906,"Ġcameras":13907,"Ġlots":13908,"this":13909,"Ġmanifest":13910,"Ġjoy":13911,"ĠChuck":13912,"Ġacclaim":13913,"ĠZimb":13914,"aji":13915,"Ġadvisor":13916,"Ġjoins":13917,"Char":13918,"ĠXI":13919,"Ġdecreased":13920,"Pol":13921,"Ġglow":13922,"Ġnaming":13923,"ĠMC":13924,"ĠHull":13925,"Ġimprisonment":13926,"apa":13927,"Ġgodd":13928,"ska":13929,"League":13930,"Ġensemble":13931,"Ġmarble":13932,"HC":13933,"ĠLocated":13934,"Ġverte":13935,"Ġundertaken":13936,"Ġabbre":13937,"ĠDad":13938,"ĠApost":13939,"ĠCardiff":13940,"Ġdors":13941,"Ġhonest":13942,"Ġvicinity":13943,"role":13944,"ĠLac":13945,"Ġrebounds":13946,"Ġcodes":13947,"Ġ--":13948,"October":13949,"Ġadoption":13950,"Ġsulf":13951,"Ġobst":13952,"Ġtwentieth":13953,"Ġque":13954,"Ġdynamic":13955,"abwe":13956,"ulates":13957,"Ġhumor":13958,"David":13959,"ĠFly":13960,"Ġboarding":13961,"stop":13962,"Ġtribal":13963,"Your":13964,"imity":13965,"Ġprosper":13966,"Ġimmun":13967,"Ġaccus":13968,"ĠCauc":13969,"September":13970,"Ġconfident":13971,"ĠPly":13972,"ĠAhmad":13973,"ĠStage":13974,"ĠAbdul":13975,"Ġdrives":13976,"Ġconsideration":13977,"Ġlease":13978,"sole":13979,"likely":13980,"ĠBod":13981,"Ġmagnitude":13982,"Ġunclear":13983,"Ġlogic":13984,"erek":13985,"Ġagrees":13986,"ĠKingston":13987,"ĠTwitter":13988,"Ġforever":13989,"Ġsuburbs":13990,"olics":13991,"ĠRabbi":13992,"ĠShield":13993,"iaz":13994,"stable":13995,"ĠFoot":13996,"Ġfatal":13997,"Ġaccordance":13998,"ĠWoods":13999,"ĠCyprus":14000,"Ġteammate":14001,"Ġexpelled":14002,"abi":14003,"DR":14004,"Ġexploration":14005,"Pal":14006,"ĠCitiz":14007,"Ġincidents":14008,"ĠPrinceton":14009,"ĠLithuania":14010,"Ġkissed":14011,"uras":14012,"ĠPick":14013,"ĠSheriff":14014,"ĠLGBT":14015,"Ġreconstruction":14016,"ĠBrid":14017,"Ġinteractions":14018,"Ġ1852":14019,"Ġmathematical":14020,"Ġrevived":14021,"stock":14022,"Her":14023,"Ġchorus":14024,"ĠOz":14025,"ĠCann":14026,"Ġproven":14027,"Ġpredicted":14028,"Ġnurse":14029,"nai":14030,"Af":14031,"iolet":14032,"Ġfires":14033,"naissance":14034,"ĠGeneva":14035,"ikes":14036,"ĠAndrews":14037,"Ġnotion":14038,"Ġease":14039,"Ġlover":14040,"2016":14041,"Ġballs":14042,"Life":14043,"Ġconsciousness":14044,"Ġstaring":14045,"ĠGrande":14046,"ĠCort":14047,"Ġ\"...":14048,"ĠSometimes":14049,"Ste":14050,"Ġexamined":14051,"ĠFerg":14052,"Ġsouthwestern":14053,"ento":14054,"ĠAw":14055,"ĠMeg":14056,"Ġlisting":14057,"ĠCanterbury":14058,"CAR":14059,"ĠMorr":14060,"wid":14061,"ĠHerm":14062,"Ġprobability":14063,"oriented":14064,"ashing":14065,"oline":14066,"Ġquart":14067,"Sal":14068,"unda":14069,"Ġpalm":14070,"Ġfeeding":14071,"Ġrotation":14072,"Met":14073,"Äĩ":14074,"ieu":14075,"Ġbreakfast":14076,"six":14077,"ĠSurrey":14078,"ĠSolomon":14079,"uanian":14080,"Ġlun":14081,"ewise":14082,"oque":14083,"ĠFlying":14084,"Ġmissionary":14085,"Ġconsensus":14086,"Ġdragon":14087,"Ġpig":14088,"ĠAdvanced":14089,"Ġhabitats":14090,"oku":14091,"Ġaerial":14092,"Ġlifestyle":14093,"IF":14094,"ĠUganda":14095,"ĠMang":14096,"lies":14097,"zing":14098,"roscop":14099,"Ġopposing":14100,"avin":14101,"Ġepit":14102,"Ġion":14103,"Ġdimin":14104,"Ġje":14105,"ĠTransit":14106,"ĠJohannes":14107,"Ġcomplicated":14108,"Ġspeaks":14109,"ĠSource":14110,"government":14111,"iblical":14112,"ÏĤ":14113,"Ġintellig":14114,"ĠUniverse":14115,"Ġbetray":14116,"ĠParalymp":14117,"ĠDuncan":14118,"Ġcant":14119,"erals":14120,"Ġtheoretical":14121,"Ġcurrency":14122,"sign":14123,"arians":14124,"ĠKazakh":14125,"Ġske":14126,"ĠBears":14127,"ĠDim":14128,"ĠGuang":14129,"Ġmonitoring":14130,"Ġmineral":14131,"Ġsubstance":14132,"Ġcopyright":14133,"Ġbills":14134,"Ġhumanity":14135,"Ġorph":14136,"Ġquit":14137,"Jos":14138,"Ġpurple":14139,"ĠCavalry":14140,"Ġinterviewed":14141,"Ġwarr":14142,"Ġattractive":14143,"Ġfed":14144,"best":14145,"Ġvoiced":14146,"oux":14147,"ĠAnnual":14148,"ĠEllis":14149,"ĠColin":14150,"Ġcer":14151,"ĠRank":14152,"ĠPublishing":14153,"Ġconvince":14154,"Ġseparately":14155,"Ġfinale":14156,"Ġdock":14157,"Ġdancer":14158,"Ġsaving":14159,"Ġadequ":14160,"ĠHindi":14161,"God":14162,"ĠMorocco":14163,"Ġtoss":14164,"Ġboost":14165,"cap":14166,"Ġmature":14167,"Ã©d":14168,"Ġrejoin":14169,"ancers":14170,"ĠJesse":14171,"Äģn":14172,"ĠEstate":14173,"Ġrode":14174,"Ġnavy":14175,"ĠHim":14176,"ĠCompetition":14177,"Ġ1853":14178,"bian":14179,"ylan":14180,"Ġalgebra":14181,"Ġrepairs":14182,"ĠEngineers":14183,"Ġlib":14184,"Ġproposals":14185,"ĠTestament":14186,"ĠLutheran":14187,"ĠCampus":14188,"Ġpreservation":14189,"ublished":14190,"ictionary":14191,"Ġgarage":14192,"ĠMalta":14193,"somet":14194,"ĠBaronet":14195,"ĠHi":14196,"Âłft":14197,"ĠPresbyterian":14198,"Ġslopes":14199,"missions":14200,"ĠAlpha":14201,"Ġvig":14202,"Ġinclusion":14203,"Ġcolonel":14204,"Ġguided":14205,"Ġrings":14206,"Ġzones":14207,"OW":14208,"eri":14209,"non":14210,"ete":14211,"Ġrevol":14212,"ĠAna":14213,"idi":14214,"ĠTalk":14215,"Ġbacteria":14216,"Ġcha":14217,"arin":14218,"ĠDistinguished":14219,"ĠFerdinand":14220,"Ġcrashed":14221,"Ġoak":14222,"yd":14223,"Ġcondemned":14224,"Ġremoving":14225,"Ġconceived":14226,"songwriter":14227,"ĠTampa":14228,"Ġarmor":14229,"ĠKem":14230,"ĠAgre":14231,"ĠUnfortunately":14232,"ĠTree":14233,"ensen":14234,"ĠConstantin":14235,"Ġinvitation":14236,"division":14237,"itory":14238,"Ġwolf":14239,"ĠAur":14240,"andra":14241,"stanbul":14242,"ĠBasin":14243,"Ġregistration":14244,"Ġcrucial":14245,"Ġarguing":14246,"chewan":14247,"ĠDominican":14248,"Ġclimbed":14249,"lessly":14250,"thouse":14251,"Ġaveraged":14252,"ĠCycl":14253,"anca":14254,"Ġembarrass":14255,"cu":14256,"Ġsalary":14257,"Ġperforms":14258,"Ġanten":14259,"path":14260,"ahu":14261,"Ġarose":14262,"erie":14263,"Ġdining":14264,"Ġencl":14265,"Ġyes":14266,"ĠGT":14267,"cor":14268,"ĠAch":14269,"Ġclerk":14270,"Ġlayout":14271,"ĠPlate":14272,"ĠBeaut":14273,"Ġnod":14274,"Ġwishes":14275,"Ġcustoms":14276,"Ġestimate":14277,"Ġdraws":14278,"Ġdealt":14279,"Ġpromotional":14280,"Ġdeeper":14281,"ĠOslo":14282,"ĠBradley":14283,"airy":14284,"ĠPir":14285,"rowing":14286,"ĠFighter":14287,"Ġfossil":14288,"elo":14289,"lass":14290,"anian":14291,"Ġdiscussions":14292,"Ġwildlife":14293,"Ġovercome":14294,"mercially":14295,"stairs":14296,"ĠSalvador":14297,"Ġconvoy":14298,"ĠRanch":14299,"Ġrenovated":14300,"days":14301,"Ġpopulated":14302,"Ġburst":14303,"este":14304,"ĠBradford":14305,"heng":14306,"Ġestimates":14307,"Ġorg":14308,"othe":14309,"Ġcrack":14310,"Ġnorthwestern":14311,"December":14312,"Ġoffense":14313,"Ġproximity":14314,"Ġportraits":14315,"Ġreader":14316,"Ġlord":14317,"uded":14318,"Ġconstr":14319,"Ġibn":14320,"ĠRichardson":14321,"Ġhappening":14322,"Ġchlor":14323,"Ġservants":14324,"ifax":14325,"ettes":14326,"ĠGren":14327,"Ġstruggling":14328,"Ġcareful":14329,"Ġbelieving":14330,"ĠBea":14331,"ĠVoice":14332,"Ġmeasuring":14333,"ĠSimpson":14334,"onne":14335,"Ġassassination":14336,"Ġamph":14337,"erves":14338,"Ġlegacy":14339,"Cal":14340,"ĠGael":14341,"Ġpeninsula":14342,"Ġexhaust":14343,"ĠAdrian":14344,"ĠAN":14345,"Ġinstant":14346,"{{":14347,"ĠGaz":14348,"Ġlimestone":14349,"ĠNas":14350,"Ġdropping":14351,"ĠDynasty":14352,"fold":14353,"ĠIBM":14354,"Ġ1849":14355,"Los":14356,"Ġfortune":14357,"Ġattribut":14358,"Ġrelegation":14359,"cal":14360,"Rock":14361,"agle":14362,"label":14363,"assy":14364,"Ġpreval":14365,"Ġexempt":14366,"Ġspectrum":14367,"ĠIdaho":14368,"Ġspl":14369,"Ġprotecting":14370,"Ġbrut":14371,"idan":14372,"ĠArmenia":14373,"ĠAB":14374,"Ġlesser":14375,"gener":14376,"Ġlikes":14377,"Ġflagship":14378,"Ġposthum":14379,"Ġstrikes":14380,"Ġarchitects":14381,"ĠGibson":14382,"ĠCaroline":14383,"esa":14384,"Ġcounted":14385,"Ġdefinitely":14386,"PM":14387,"Ġbiology":14388,"ishi":14389,"ooks":14390,"rev":14391,"ĠActor":14392,"ĠSantiago":14393,"ĠHass":14394,"ĠZimbabwe":14395,"etry":14396,"Ġtrapped":14397,"Ġsunk":14398,"Ġsurprising":14399,"Fl":14400,"ĠEpiscopal":14401,"Ġfeather":14402,"Ġtob":14403,"Super":14404,"Ġreconc":14405,"Ġpedest":14406,"ĠGuards":14407,"canic":14408,"ĠLuxemb":14409,"hero":14410,"Ġrendered":14411,"1998":14412,"eastern":14413,"Ġkeeps":14414,"Brit":14415,"Ġentries":14416,"Ġlegally":14417,"1970":14418,"ighthouse":14419,"Phil":14420,"rant":14421,"Ġinvestigated":14422,"Ġrenovation":14423,"chester":14424,"ĠLegislature":14425,"Ġtomorrow":14426,"Ġoxid":14427,"Ġcontinental":14428,"Ġrivalry":14429,"Ġadm":14430,"ĠPink":14431,"Ġswept":14432,"ĠSaskatchewan":14433,"ĠTrin":14434,"Ġaccidentally":14435,"Ġflesh":14436,"ardi":14437,"Ġsmell":14438,"ĠMine":14439,"Ġjaw":14440,"ĠVladimir":14441,"Ġunderlying":14442,"Ġminim":14443,"ouns":14444,"nolds":14445,"ĠLie":14446,"Ġlowered":14447,"ĠSang":14448,"Ġromance":14449,"ĠWildlife":14450,"ĠSter":14451,"anyon":14452,"elin":14453,"ĠDesert":14454,"Ġdimensions":14455,"ĠBelgrade":14456,"Ġ1847":14457,"aku":14458,"Ġremarkable":14459,"dan":14460,"Ġactivated":14461,"ĠPrincipal":14462,"ĠPath":14463,"ĠSebastian":14464,"Hist":14465,"ancement":14466,"oyle":14467,"Ġinterven":14468,"Ġwithdrawal":14469,"ĠClaire":14470,"Ġscales":14471,"Ġboxing":14472,"aneous":14473,"Ġballot":14474,"Ġconsiders":14475,"Ġtrace":14476,"ĠFounded":14477,"Ġlaps":14478,"Ġconquest":14479,"ĠTiger":14480,"ĠMobile":14481,"ĠHir":14482,"Ġboyfriend":14483,"ennium":14484,"Comm":14485,"ĠPerhaps":14486,"Ġknees":14487,"Ġhorizontal":14488,"Ġdepicting":14489,"Ġrebel":14490,"Ġabstract":14491,"ĠSchw":14492,"icals":14493,"OM":14494,"ĠSafety":14495,"Ġramp":14496,"ĠPorter":14497,"ĠKurd":14498,"Ġrunway":14499,"ĠVid":14500,"ĠEb":14501,"esters":14502,"ĠDj":14503,"edo":14504,"roying":14505,"Pat":14506,"Ġtrim":14507,"ea":14508,"Ġhurricane":14509,"ĠBailey":14510,"Ġelaborate":14511,"ĠVil":14512,"ĠKurt":14513,"Ġbutton":14514,"November":14515,"1997":14516,"ĠArsenal":14517,"ĠFinals":14518,"rium":14519,"ĠAF":14520,"inas":14521,"ĠHenderson":14522,"Ġresponsibilities":14523,"Ġtough":14524,"Ġmarking":14525,"Ġreper":14526,"abling":14527,"encia":14528,"Robert":14529,"Ġpresidency":14530,"omatic":14531,"ĠRodrig":14532,"ĠGol":14533,",'":14534,"Ġrises":14535,"Ġstead":14536,"than":14537,"idelines":14538,"member":14539,"Ġcooking":14540,"GN":14541,"Ġnaked":14542,"ĠKra":14543,"Sir":14544,"Ġbonds":14545,"ĠWednesday":14546,"ught":14547,"awi":14548,"ĠPowell":14549,"ĠDund":14550,"ellar":14551,"Ġdisabled":14552,"Ġpine":14553,"January":14554,"Ġvault":14555,"Ġdense":14556,"iking":14557,"Port":14558,"dorf":14559,"Ġpushing":14560,"uxiliary":14561,"Ġtrigg":14562,"achers":14563,"ĠActress":14564,"ĠWorth":14565,"Ġhub":14566,"Ġarguments":14567,"Ġwitnessed":14568,"Ġrush":14569,"Ġthrust":14570,"amine":14571,"Ġconsistently":14572,"Ġvinyl":14573,"Ġbrands":14574,"Ġfertil":14575,"appa":14576,"ĠTroy":14577,"ĠSH":14578,"itative":14579,"ĠCIA":14580,"ushes":14581,"Ġcustody":14582,"Ġorch":14583,"Ġtheorem":14584,"oup":14585,"ĠEditor":14586,"Ġmarri":14587,"ĠCord":14588,"Ġdirecting":14589,"Îµ":14590,"Ġslipped":14591,"ĠESPN":14592,"ĠMoses":14593,"thood":14594,"Ġdeterior":14595,"ĠDob":14596,"ĠInstit":14597,"ĠGerald":14598,"Ġsuburban":14599,"ĠMario":14600,"Ġpremises":14601,"ĠHurricane":14602,"ĠHod":14603,"Ġreconstruct":14604,"Ġmanuscripts":14605,"ĠReich":14606,"ĠGlass":14607,"headed":14608,"ĠSaw":14609,"ĠStore":14610,"Ġsne":14611,"linary":14612,"Ġenrollment":14613,"ĠAlbania":14614,"ĠWarwick":14615,"ĠBryan":14616,"ĠAmendment":14617,"Ġdemonstrate":14618,"ĠPreston":14619,"Ġanswers":14620,"Ġcontend":14621,"Ġjudgment":14622,"Ġterrorist":14623,"uclear":14624,"Hung":14625,"Ġ130":14626,"Ġexhibits":14627,"ĠHerald":14628,"Ġallocated":14629,"Ġalphabet":14630,"ĠNumber":14631,"addle":14632,"ĠParks":14633,"Ġincred":14634,"ĠMing":14635,"ĠScientific":14636,"ĠGuj":14637,"Ġparas":14638,"ĠBloom":14639,"ĠHalf":14640,"Ġsnail":14641,"antle":14642,"ĠMade":14643,"ĠKumar":14644,"ĠDirectors":14645,"ĠProper":14646,"ĠCatholics":14647,"ĠAnnie":14648,"Ġcalculated":14649,"ĠRomans":14650,"Ġsank":14651,"Ġmanga":14652,"enzie":14653,"Ġsomehow":14654,"Ġbankruptcy":14655,"chron":14656,"quin":14657,"Ġstere":14658,"ĠDS":14659,"\"\".":14660,"ĠBrighton":14661,"ĠMs":14662,"Ġembarked":14663,"Ġinstructor":14664,"Ġthread":14665,"ĠVeter":14666,"grim":14667,"ĠPiet":14668,"listed":14669,"Ġfragment":14670,"hurst":14671,"oning":14672,"bone":14673,"Ġpursuit":14674,"ĠPlymouth":14675,"ĠMemphis":14676,"Ġmechanisms":14677,"Ġfavorable":14678,"ĠCurtis":14679,"Ġprohibited":14680,"ĠShop":14681,"Ġcreator":14682,"Ġstabil":14683,"ritic":14684,"ĠVa":14685,"ĠPalm":14686,"Ġna":14687,"veill":14688,"ĠFormation":14689,"Okay":14690,"ĠDoug":14691,"ĠBlu":14692,"restrial":14693,"gary":14694,"ĠFellowship":14695,"Ġemigrated":14696,"Ġbreathing":14697,"Brien":14698,"uta":14699,"ĠHeaven":14700,"Ġtrap":14701,"Ġkeys":14702,"ĠMachine":14703,"Ġinterim":14704,"ĠManitoba":14705,"seat":14706,"ĠAdditional":14707,"Old":14708,"Ġexplored":14709,"ÄĻ":14710,"Ġcomposers":14711,"Ġlon":14712,"ĠMonten":14713,"rand":14714,"Ġprotagonist":14715,"Ġclimbing":14716,"Ġunited":14717,"Ġ1846":14718,"istle":14719,"Ġsolve":14720,"cr":14721,"Ġhamlet":14722,"otta":14723,"ĠClaud":14724,"\"></":14725,"ĠRepublicans":14726,"stra":14727,"OP":14728,"clusive":14729,"Sam":14730,"agonal":14731,"Ġfreestyle":14732,"ĠSep":14733,"ĠNATO":14734,"cock":14735,"Ġunt":14736,"Ġranch":14737,"Ġenormous":14738,"ĠAFL":14739,"Ġpresum":14740,"Ġputs":14741,"akk":14742,"Sat":14743,"ĠChancellor":14744,"Ġscreenplay":14745,"Ġautonomous":14746,"Ġapproaching":14747,"ĠBil":14748,"ĠBCE":14749,"Did":14750,"Ġfights":14751,"Ġbotan":14752,"ĠMiles":14753,"Ġmolecules":14754,"ĠQing":14755,"ĠTH":14756,"Ġbeings":14757,"monton":14758,"icz":14759,"ĠSold":14760,"Ġcontents":14761,"Ġmeal":14762,"Ireland":14763,"jud":14764,"Ġorientation":14765,"Ġstrategies":14766,"Ġtelev":14767,"Ġtradem":14768,"Hen":14769,"Ġoptical":14770,"Ġshrugged":14771,"Ġfrog":14772,"Ġopenly":14773,"ĠLinda":14774,"ĠMilton":14775,"Ġnicknamed":14776,"ĠNadu":14777,"Ġpronounced":14778,"olds":14779,"Ġpriority":14780,"ĠBurton":14781,"Ġcrowned":14782,"Sy":14783,"Ġwelcome":14784,"Ġloves":14785,"Ġabbrev":14786,"range":14787,"Ġletting":14788,"Ġinaugurated":14789,"smith":14790,"Ġcloth":14791,"Ġaltar":14792,"Ġcasting":14793,"atto":14794,"Ġpref":14795,"lando":14796,"Ġcontrolling":14797,"%).":14798,"ĠMartha":14799,"Ġtactics":14800,"ĠPrison":14801,"Ġrescued":14802,"MT":14803,"grad":14804,"ĠCritics":14805,"Ġgoddess":14806,"lez":14807,"ĠBaby":14808,"Ġ1500":14809,"ĠAgainst":14810,"veillance":14811,"ĠCanton":14812,"Ġobviously":14813,"Ġrecurring":14814,"Ġharass":14815,"Ġwaist":14816,"Ġdepicts":14817,"ĠComedy":14818,"ĠCla":14819,"Ġsurrendered":14820,"ĠCris":14821,"Ġsculptor":14822,"atics":14823,"ĠCalgary":14824,"ĠCollect":14825,"Ġintact":14826,"Europe":14827,"Ġrevealing":14828,"powered":14829,"Ġfare":14830,"Ġcub":14831,"Ġavoided":14832,"ĠDow":14833,"asium":14834,"ĠCambod":14835,"imer":14836,"Ġdestroying":14837,"mal":14838,"otted":14839,"Ġcorridor":14840,"Ġaftermath":14841,"Que":14842,"ĠThir":14843,"Ġsubfamily":14844,"Ġbarrier":14845,"Ġhaul":14846,"Ġauto":14847,"Ġretrie":14848,"hell":14849,"Ġsurpass":14850,"Ġportfol":14851,"ĠDarl":14852,"market":14853,"Ġpolitically":14854,"Ġingred":14855,"ĠTues":14856,"Ġho":14857,"Ġbathroom":14858,"Ġ1812":14859,"ĠContest":14860,"Ġcontinuously":14861,"Ġsubspecies":14862,"ĠHalifax":14863,"yards":14864,"Ġgamb":14865,"Ġcommittees":14866,"Ðº":14867,"Rich":14868,"Ġblade":14869,"ĠSpeaker":14870,"pose":14871,"Ġtune":14872,"ĠFergus":14873,"EF":14874,"ĠAssociate":14875,"istocr":14876,"ĠShore":14877,"],":14878,"igger":14879,"ija":14880,"ocolate":14881,"Ġtobacco":14882,"Sl":14883,"ĠBalk":14884,"ĠBasil":14885,"Ġsummon":14886,"Ġsax":14887,"ĠAboriginal":14888,"Get":14889,"iman":14890,"obs":14891,"Ġcease":14892,"ĠSara":14893,"Ġsupervision":14894,"ĠPeak":14895,"ĠCert":14896,"Ġknight":14897,"agne":14898,"Ġporch":14899,"osely":14900,"actic":14901,"Ġstopping":14902,"Ġfacilitate":14903,"ĠParam":14904,"ĠHopkins":14905,"Ġgenera":14906,"Ñĥ":14907,"Ġraced":14908,"ĠClif":14909,"Ġlasting":14910,"Ġmembrane":14911,"Ma":14912,"ĠHarper":14913,"Ġdorm":14914,"ĠUSSR":14915,"Ġentrepreneur":14916,"ocate":14917,"Ġindirect":14918,"ĠEvangel":14919,"ĠArd":14920,"Ġsponsor":14921,"aru":14922,"Ġboxes":14923,"Ġpayments":14924,"adh":14925,"ĠFernando":14926,"Ġjointly":14927,"ĠHaven":14928,"Ġperformer":14929,"Ġurged":14930,"ÃĹ":14931,"ĠFilipino":14932,"Ġalarm":14933,"kind":14934,"inum":14935,"Ġathletics":14936,"Ġgameplay":14937,"Little":14938,"NP":14939,"Ġmonks":14940,"Ġpub":14941,"comes":14942,"Ġpav":14943,"Ġdigit":14944,"Ġcommercially":14945,"itzer":14946,"kees":14947,"ĠPhilosophy":14948,"Ġconsumers":14949,"Ġfron":14950,"Ġbuck":14951,"Ġta":14952,"Ġunlikely":14953,"Ġimported":14954,"iott":14955,"iston":14956,"asse":14957,"ĠNaples":14958,"Ġfet":14959,"ĠColonial":14960,"Ġtrophy":14961,"Art":14962,"Ġrehabilit":14963,"ĠInterior":14964,"OL":14965,"Ġsixty":14966,"Ġrecreational":14967,"Ġmosque":14968,"ĠVale":14969,"ĠPlaza":14970,"150":14971,"Out":14972,"ĠGuatem":14973,"Ġfacade":14974,"Ġspur":14975,"ĠAllah":14976,"ĠMcDonald":14977,"Ã¤r":14978,"See":14979,"Ġinland":14980,"ĠReynolds":14981,"Ġfacts":14982,"Ġphilosopher":14983,"houses":14984,"ĠTeh":14985,"Ġepic":14986,"ĠCoalition":14987,"ĠIgn":14988,"ĠTrain":14989,"enna":14990,"Ġagreements":14991,"ĠFrankfurt":14992,"Ġutility":14993,"ĠLig":14994,"educ":14995,"ĠSlovenia":14996,"ĠCrus":14997,"onomic":14998,"Ġfaction":14999,"Ġrelieved":15000,"Ġloaded":15001,"ĠExamples":15002,"Ġhumid":15003,"ĠRhine":15004,"ervatory":15005,"ĠCorp":15006,"Ġparad":15007,"Des":15008,"arium":15009,"ribe":15010,"iped":15011,"ĠSabha":15012,"ĠRab":15013,"urities":15014,"Ġaudition":15015,"Ġenterprise":15016,"kinson":15017,"Ġpreceding":15018,"ĠCanyon":15019,"colm":15020,"ĠRA":15021,"Ġexcited":15022,"andro":15023,"Ġphotograp":15024,"Ġchallenging":15025,"ĠCha":15026,"ĠEugene":15027,"plane":15028,"Ġsalv":15029,"Ġreceptor":15030,"Ġacceptance":15031,"ĠPrussia":15032,"Ġplanes":15033,"Ġlos":15034,"manuel":15035,"ĠCu":15036,"Ġinvestigations":15037,"ĠWesley":15038,"ĠBrent":15039,"Ġsocialist":15040,"Ġmurders":15041,"ĠCapitol":15042,"ĠPam":15043,"ĠStudy":15044,"Ġbitter":15045,"Ġcere":15046,"oken":15047,"ĠGiovanni":15048,"Ġtrucks":15049,"ĠPrefecture":15050,"ĠCatal":15051,"Ġhypothesis":15052,"Ġdelegation":15053,"Ġsculptures":15054,"ĠAlbany":15055,"alis":15056,"hears":15057,"Ġepid":15058,"Ġproclaimed":15059,"ĠChin":15060,"Ġpropri":15061,"ĠNothing":15062,"itively":15063,"Ġsuccessive":15064,"Ã©m":15065,"Ġhotels":15066,"Ġinherit":15067,"Ġ1820":15068,"ĠFifth":15069,"700":15070,"ĠAllan":15071,"ĠManor":15072,"gae":15073,"Ġbounded":15074,"aris":15075,"landers":15076,"ĠHarbour":15077,"Ġresur":15078,"Ġdescended":15079,"ĠKaren":15080,"ĠHeat":15081,"ungle":15082,"ĠGP":15083,"ĠBedford":15084,"Ġshar":15085,"Ġtickets":15086,"Ġelderly":15087,"Ġbrilliant":15088,"Ġmotif":15089,"Ġrapper":15090,"Ġwitnesses":15091,"rier":15092,"ĠWend":15093,"zens":15094,"ĠResources":15095,"Ġvelocity":15096,"ĠMarines":15097,"Ġnovelist":15098,"Ġ1845":15099,"Ġluck":15100,"Ġlabels":15101,"Ġenhanced":15102,"Ġcrazy":15103,"cussion":15104,"ĠSisters":15105,"ĠBend":15106,"Ġgenres":15107,"alli":15108,")\",":15109,"Ġwrap":15110,"Ġphon":15111,"ĠLeslie":15112,"Ġdiagnosed":15113,"has":15114,"ĠKin":15115,"established":15116,"hey":15117,"icus":15118,"Ġharder":15119,"atched":15120,"Ġstupid":15121,"Ġincl":15122,"ĠPine":15123,"Ġtender":15124,"Ġlengths":15125,"Ġpossessed":15126,"Ġachieving":15127,"eni":15128,"ĠHess":15129,"ĠMusical":15130,"Ġforgotten":15131,"ĠBoeing":15132,"Ġsubmit":15133,"bad":15134,"mand":15135,"ĠAnat":15136,"hra":15137,"ĠCharter":15138,"Ġheter":15139,"ĠBelfast":15140,"ĠJeremy":15141,"ĠDw":15142,"Ġbreat":15143,"Ġcounts":15144,"empor":15145,"Ġradi":15146,"Ã¯":15147,"ĠCrystal":15148,"Ġhers":15149,"GP":15150,"rica":15151,"ĠThursday":15152,"ĠFeder":15153,"arre":15154,"ĠNikol":15155,"ĠMechan":15156,"ĠCed":15157,"dis":15158,"ĠMiddles":15159,"Great":15160,"ĠTanz":15161,"isive":15162,"Ġaxis":15163,"istence":15164,"ĠAgreement":15165,"Ġrespected":15166,"Ġsemifinals":15167,"Ġfeared":15168,"Ġantib":15169,"ĠGlobe":15170,"Ġharbour":15171,"Ġunveiled":15172,"daughter":15173,"Ġbombs":15174,"Ġhttp":15175,"ĠAlexandria":15176,"ÂłM":15177,"Ġbatteries":15178,"Ġbuying":15179,"Ġbishops":15180,"Ġrulers":15181,"ĠLyon":15182,"Ġpastor":15183,"Ġfoundations":15184,"ĠFolk":15185,"Ġsettings":15186,"ĠQur":15187,"xi":15188,"ĠLah":15189,"cin":15190,"Ġadds":15191,"zegov":15192,"ipur":15193,"ĠPhysics":15194,"ĠEg":15195,"estock":15196,"ĠJennifer":15197,"Ġdivide":15198,"ĠWindsor":15199,"https":15200,"atal":15201,"ĠCit":15202,"ĠArchae":15203,"ĠBever":15204,"ĠPlanning":15205,"ĠCave":15206,"ĠHarm":15207,"ĠPortsmouth":15208,"Ġhardly":15209,"author":15210,"vens":15211,"hart":15212,"TI":15213,"Ġworkshop":15214,"ĠFraser":15215,"Ġà¤":15216,"Ġpointing":15217,"ealous":15218,"zhou":15219,"Ġluxury":15220,"Ġcater":15221,"lay":15222,"Ġadvocated":15223,"Ġadministrator":15224,"Ġpreventing":15225,"Ġcluster":15226,"Ġmotorcycle":15227,"ĠXX":15228,"alid":15229,"Ġdiscipl":15230,"1995":15231,"idays":15232,"Ġuncons":15233,"ĠMonroe":15234,"enary":15235,"formed":15236,"Ġinvaded":15237,"ĠVIII":15238,"walk":15239,"ĠMail":15240,"Ġsustainable":15241,"ĠRobertson":15242,"Ġauthored":15243,"ĠNSW":15244,"ĠDylan":15245,"Ġorganize":15246,"ainted":15247,"Ġorth":15248,"Ġreliable":15249,"ĠLevel":15250,"assis":15251,"Ġadmission":15252,"Ġtackle":15253,"à¦":15254,"Ġcomprised":15255,"ĠLeop":15256,"elyn":15257,"icles":15258,"Ġerrors":15259,"1996":15260,"Ah":15261,"Ġmodest":15262,"ĠFun":15263,"stadt":15264,"uchi":15265,"Ġseeks":15266,"ĠVarious":15267,"ĠEdmonton":15268,"astics":15269,"Ġstatistical":15270,"Ġwitch":15271,"Ġproceedings":15272,"Ġproceeds":15273,"ĠSpringfield":15274,"Ġresolved":15275,"Ġtornado":15276,"amas":15277,"ĠStafford":15278,"ãĥ":15279,"ĠOct":15280,"ĠProf":15281,"Thank":15282,"ĠRochester":15283,"Ġartifacts":15284,"Ġlaser":15285,"oping":15286,"ĠTyp":15287,"Ġthermal":15288,"Ġtap":15289,"ĠShadow":15290,"Ġveterans":15291,"although":15292,"Ġblast":15293,"Ġendangered":15294,"Les":15295,"ych":15296,"Ġraids":15297,"Ġvacant":15298,"Ġsynthesis":15299,"Ġsubdiv":15300,"Ġrealizes":15301,"imental":15302,"ĠCly":15303,"ocial":15304,"Ġunto":15305,"Ġheaven":15306,"Lou":15307,"Ġconspiracy":15308,"criptions":15309,"Ġaccuracy":15310,"Ġmuscles":15311,"Ġrubber":15312,"ĠScholars":15313,"adia":15314,"Ġgeographical":15315,"aceut":15316,"ĠBerk":15317,"iots":15318,"ĠCome":15319,"Ġseemingly":15320,"Ġperfectly":15321,"ĠSpart":15322,"ĠGÃ¶":15323,"Of":15324,"Ġspat":15325,"Ġbend":15326,"ĠRib":15327,"Ġphilanthrop":15328,"Ġbeds":15329,"Ġmuseums":15330,"Ġreflects":15331,"Ġmaternal":15332,"Ġcontracted":15333,"Ġcontrad":15334,"ei":15335,"ĠLenn":15336,"ablo":15337,"Ġrectangular":15338,"ĠHeadquarters":15339,"Ġlongtime":15340,"isdom":15341,"Ġfunny":15342,"Ïĥ":15343,"ĠPresidential":15344,"warf":15345,"Ġsectors":15346,"ĠParliamentary":15347,"ĠGlenn":15348,"ĠMoss":15349,"ĠLomb":15350,"ĠApollo":15351,"owner":15352,"Ġchess":15353,"ĠNan":15354,"Ġperf":15355,"Ġinnovation":15356,"Ġobtaining":15357,"Ġlined":15358,"Russian":15359,"Ġancestry":15360,"aternity":15361,"Ġverb":15362,"Ġallied":15363,"Ġma":15364,"avo":15365,"ducer":15366,"Ġadvancing":15367,"ĠGem":15368,"ĠMcN":15369,"ĠOriginal":15370,"Ġcontestants":15371,"ĠNotre":15372,"Ġextract":15373,"ĠBanks":15374,"Ġflowing":15375,"ĠBurns":15376,"Ġbless":15377,"Ġembed":15378,"ĠAngels":15379,"ĠOwn":15380,"berto":15381,"Ġsends":15382,"ĠArchitecture":15383,"February":15384,"ondo":15385,"Ġlacked":15386,"Ġsponsorship":15387,"ĠGamb":15388,"Ġcourage":15389,"Ġshocked":15390,"Ġsink":15391,"base":15392,"odor":15393,"ĠBillboard":15394,"ĠTask":15395,"Ġflee":15396,"Ġcertificate":15397,"ths":15398,"Ġilleg":15399,"there":15400,"Ġdirt":15401,"ĠIF":15402,"Ġresearcher":15403,"ĠLic":15404,"ĠWord":15405,"ĠLiz":15406,"Ġdepot":15407,"Ġresist":15408,"arity":15409,"rina":15410,"Ġstrings":15411,"Ġundergo":15412,"Ġmerchants":15413,"ĠDiana":15414,"Saint":15415,"Ġpeaceful":15416,"Gold":15417,"ĠCinema":15418,"Ġintroducing":15419,"osystem":15420,"ĠComplex":15421,"Ġsacrifice":15422,"ĠCrist":15423,"ifiers":15424,"Mat":15425,"ĠUm":15426,"George":15427,"si":15428,"Ġslid":15429,"Ġsilk":15430,"Ġaristocr":15431,"Ġspare":15432,"inds":15433,"Ġaccompanying":15434,"ĠAL":15435,"iformes":15436,"ĠVij":15437,"Ġcareers":15438,"ĠKend":15439,"Ġ1837":15440,"Ġunsuccessfully":15441,"heric":15442,"Ġsecretly":15443,"Ġwingspan":15444,"ĠDepression":15445,"Ġlocals":15446,"Ġ125":15447,"ĠDew":15448,"Ġmarsh":15449,"cycl":15450,"ĠCel":15451,"Ġpractition":15452,"BR":15453,"card":15454,"lif":15455,"Ġpresenting":15456,"ĠKw":15457,"Ġholy":15458,"ĠEstonia":15459,"Ġpropaganda":15460,"Ġupr":15461,"Ġmil":15462,"Ġ140":15463,"ordination":15464,"ĠLost":15465,"ĠWarriors":15466,"ĠAmericas":15467,"ĠUA":15468,"ĠSeminary":15469,"Ġeleg":15470,"wald":15471,"Ġhunt":15472,"ĠLS":15473,"ĠGhost":15474,"Reg":15475,"acker":15476,"ylum":15477,"Ġtrunk":15478,"Ġori":15479,"ĠProgressive":15480,"Ġvine":15481,"ĠWriters":15482,"Ġdetective":15483,"ivo":15484,"Ġdisputed":15485,"fin":15486,"ĠMorrison":15487,"Ġscout":15488,"Ġdisk":15489,"Ġfactories":15490,"Ġinnocent":15491,"Ġceremonies":15492,"Ġcaf":15493,"Ġinvested":15494,"Ġtrails":15495,"Ġloans":15496,"Ġnationalist":15497,"Ġdeployment":15498,"ĠHMS":15499,"ĠHoff":15500,"ĠIstanbul":15501,"yg":15502,"Ġinitiatives":15503,"ĠAberde":15504,"yon":15505,"Ġ350":15506,"ĠLynn":15507,"pri":15508,"Ã°":15509,"Ġdemonstration":15510,"ĠComb":15511,"ifferent":15512,"Ġdisgu":15513,"2017":15514,"Ġobjectives":15515,"ados":15516,"etics":15517,"ĠKenneth":15518,"Ġcord":15519,"Ġdiving":15520,"ĠBetty":15521,"Ġdonations":15522,"Ġdecree":15523,"clesiast":15524,"hot":15525,"Ġdiff":15526,"Ġgrip":15527,"Ġvampire":15528,"present":15529,"Ġsaint":15530,"rition":15531,"Ġparade":15532,"etti":15533,"Ġserver":15534,"Ġdelegates":15535,"Ġpretend":15536,"ĠRNA":15537,"Ġrookie":15538,"ĠÅģ":15539,"Ã¡r":15540,"Ġlig":15541,"Ġcontacts":15542,"Ġmaj":15543,"eno":15544,"Ġsyll":15545,"ĠCohen":15546,"andin":15547,"Ġvariables":15548,"ĠLaz":15549,"rians":15550,"ĠYes":15551,"Ġslam":15552,"Ġaccomplish":15553,"ĠKane":15554,"Ġfloating":15555,"ĠMale":15556,"Ġnan":15557,"music":15558,"ĠWake":15559,"ĠLancaster":15560,"ĠBarnes":15561,"ĠUtt":15562,"ĠBord":15563,"Ġsubordin":15564,"Ġneur":15565,"Ġgrace":15566,"Ġspecimen":15567,"Har":15568,"Ġhostile":15569,"ĠClement":15570,"ĠWagner":15571,"ĠHels":15572,"Ġmanagers":15573,"ĠMick":15574,"verage":15575,"Ġvoltage":15576,"ĠAntarctic":15577,"Ġmonster":15578,"ĠFay":15579,"ĠAccount":15580,"ĠIsab":15581,"ĠExcell":15582,"Ġtestimony":15583,"Ġpromising":15584,"Ġevaluation":15585,"ĠKann":15586,"Ġtonn":15587,"Ġinterf":15588,"Ġessays":15589,"Ġpoets":15590,"ĠÃĸ":15591,"Ã»":15592,"ficial":15593,"Ġflowering":15594,"orrect":15595,"Ġdimension":15596,"Ġmarched":15597,"ĠIN":15598,"Ġchim":15599,"ĠWA":15600,"ĠBuddhism":15601,"zegovina":15602,"ĠLoren":15603,"Ġnavigation":15604,"ĠLuxembourg":15605,"Ġbent":15606,"ĠAFC":15607,"Ġpresenter":15608,"shot":15609,"Ġlighter":15610,"actions":15611,"otypes":15612,"adio":15613,"Ġtrump":15614,"squ":15615,"Ġspelled":15616,"Day":15617,"Gl":15618,"ĠKang":15619,"ĠCarroll":15620,"Ġgraduates":15621,"ioned":15622,"Ġprominence":15623,"orms":15624,"Ġtorture":15625,"ependent":15626,"Ġbatted":15627,"Ġrevolt":15628,"irie":15629,"ĠRichards":15630,"ĠDipl":15631,"ĠIndividual":15632,"Ġchuck":15633,"Ġexercises":15634,"Ġslot":15635,"Ġ1841":15636,"Ġmissiles":15637,"ĠBohem":15638,"ĠNobel":15639,"Ġconsort":15640,"âĢĻ.":15641,"ductive":15642,"Ġroutine":15643,"ĠDayton":15644,"Ev":15645,"Ñĸ":15646,"á½":15647,"Ġamid":15648,"Ġwrestler":15649,"Ġascend":15650,"ĠRever":15651,"isode":15652,"ĠBaltic":15653,"High":15654,"Ġspark":15655,"ĠFactory":15656,"Ġreunited":15657,"Ġbike":15658,"Top":15659,"Ġrealm":15660,"akov":15661,"Ġmarketed":15662,"ĠITV":15663,"ĠSacram":15664,"\"âĢĶ":15665,"ĠOrlando":15666,"smashwords":15667,"Ġoutlets":15668,"main":15669,"Ġspeeds":15670,"elfth":15671,"Ġcrews":15672,"ambo":15673,"orate":15674,"Ġcapability":15675,"irical":15676,"Ital":15677,"Ġabortion":15678,"hematic":15679,"Ð»":15680,"Ġchains":15681,"Ġpaused":15682,"people":15683,"Ġbattalions":15684,"ĠViol":15685,"igate":15686,"Ġreferee":15687,"ufficient":15688,"ĠAccess":15689,"Ã©g":15690,"ĠDud":15691,"Ġpond":15692,"phant":15693,"Ġkeen":15694,"ĠCos":15695,"bird":15696,"WR":15697,"Ġcolored":15698,"ĠQuest":15699,"Ġirrig":15700,"egie":15701,"Ġ105":15702,"...]":15703,"Ġ360":15704,"Ġverses":15705,"Ġsizes":15706,"ĠFR":15707,"Ġsubstit":15708,"olan":15709,"Ġentities":15710,"ĠDum":15711,"Ġcanton":15712,"ĠCros":15713,"ĠEk":15714,"ĠPoll":15715,"Ġultimate":15716,"Ġdeclaration":15717,"rise":15718,"imon":15719,"anor":15720,"unal":15721,"ĠExhibition":15722,"ĠIndex":15723,"ĠDoll":15724,"ĠLiberation":15725,"ĠLynch":15726,"Ġgam":15727,"Ġcomplaints":15728,"Ġspo":15729,"blem":15730,"Hol":15731,"ĠMuk":15732,"Ġrod":15733,"ĠSpider":15734,"Ġregiments":15735,"Ġprospect":15736,"Bel":15737,"iane":15738,"ĠSouthwest":15739,"ĠWorking":15740,"Ġdetected":15741,"Ġnominee":15742,"Ġcarriage":15743,"Ġsurgeon":15744,"ĠGriffin":15745,"occup":15746,"elage":15747,"arents":15748,"ĠArctic":15749,"enheim":15750,"ĠChurchill":15751,"Ġcontinent":15752,"Ġimagine":15753,"Ġlend":15754,"comed":15755,"Ġecho":15756,"ĠNacional":15757,"Ġunconscious":15758,"onation":15759,"Ġconquered":15760,"school":15761,"ĠMercury":15762,"mile":15763,"Ġfragments":15764,"Ġwounds":15765,"Ġpollution":15766,"Ġcrim":15767,"modern":15768,"ĠIg":15769,"Ġopinions":15770,"hole":15771,"uum":15772,"Ġwhenever":15773,"Ġviewing":15774,"Thomas":15775,"ensed":15776,"ĠVick":15777,"Ġhonours":15778,"Ġhighlighted":15779,"Ġderives":15780,"aternal":15781,"rano":15782,"enders":15783,"pres":15784,"Ġcarn":15785,"osity":15786,"Ġseating":15787,"mic":15788,"ĠMarion":15789,"Ġthriller":15790,"ĠStra":15791,"Ġediting":15792,"Ġresides":15793,"ĠID":15794,"Ġresponses":15795,"Ġpipe":15796,"Ġprojected":15797,"Ġ1844":15798,"Ġholder":15799,"cience":15800,"ĠGir":15801,"Ġpenn":15802,"inders":15803,"ĠParad":15804,"Ġfilling":15805,"Ġoverwhelming":15806,"Ġcrypt":15807,"kers":15808,"Ġcritically":15809,"1994":15810,"Ġeliminate":15811,"ressing":15812,"Ġdemanding":15813,"ĠTable":15814,"Ġtraces":15815,"Ġmagical":15816,"Ġpregnancy":15817,"Ġparishes":15818,"Ġhandful":15819,"neath":15820,"Ġ1836":15821,"TR":15822,"First":15823,"Jack":15824,"Ġpride":15825,"ounding":15826,"Ġmetre":15827,"ĠHunting":15828,"left":15829,"Ġaccounting":15830,"children":15831,"French":15832,"wait":15833,"ibli":15834,"Ġwool":15835,"Ġdeceased":15836,"ĠSeoul":15837,"Ġperception":15838,"ripp":15839,"Ġ1838":15840,"ĠAgricultural":15841,"uce":15842,"Ġtear":15843,"ĠPract":15844,"Ġsmallest":15845,"ĠPomer":15846,"Ġlawyers":15847,"ĠSweet":15848,"Ġgifts":15849,"Ġbio":15850,"Ġformats":15851,"Ġdil":15852,"Ġtriumph":15853,"omical":15854,"Ġadmir":15855,"Âł1":15856,"ĠDrew":15857,"Mart":15858,"ĠDiet":15859,"ipeg":15860,"ĠWyoming":15861,"Ġgly":15862,"Ġmobil":15863,"instein":15864,"ĠHern":15865,"Ġprovider":15866,"Ġfruits":15867,"alus":15868,"Ġbordered":15869,"Ġnewer":15870,"Ġrecommendations":15871,"-\"":15872,"Ġreopened":15873,"Ġstretched":15874,"Ġtrailer":15875,"OK":15876,"Ġpreceded":15877,"Ã¸r":15878,"mel":15879,"Ġfoods":15880,"ĠGiven":15881,"Ġendorsed":15882,"ĠBlair":15883,"iox":15884,"Ġdisorders":15885,"ĠTerr":15886,"Ġcostume":15887,"ĠMis":15888,"Ġrider":15889,"will":15890,"ĠPR":15891,"bot":15892,"Ġcement":15893,"around":15894,"record":15895,"ĠDarwin":15896,"good":15897,"Ġaccommodation":15898,"lied":15899,"Ġphilosophical":15900,"penter":15901,"Ġsubtropical":15902,"Ġconsole":15903,"Ġflown":15904,"1993":15905,"ĠLil":15906,"ĠCornell":15907,"Ġancestors":15908,"Ġmythology":15909,"Ġballet":15910,"ĠĠĊ":15911,"Ġpension":15912,"Ġheroes":15913,"ĠCarnegie":15914,"onny":15915,"ĠRiley":15916,"Ġgotten":15917,"ĠOfficial":15918,"lla":15919,"ĠHayes":15920,"Ġoverth":15921,"Ġgravity":15922,"ĠVi":15923,"ĠMarl":15924,"ĠMovie":15925,"Ġpatch":15926,"ĠMalcolm":15927,"Ġmassacre":15928,"send":15929,"ocaust":15930,"Ġcelebrity":15931,"Ġsometime":15932,"Ġspirits":15933,"ĠLiam":15934,"ĠOst":15935,"cover":15936,"Ġslope":15937,"Ġstrictly":15938,"ĠChess":15939,"ĠTake":15940,"Ġexpense":15941,"ĠEthiopia":15942,"Ġaunt":15943,"Ġcarriers":15944,"ĠStrat":15945,"ĠMerced":15946,"Ġstint":15947,"itorium":15948,"Ġneighborhoods":15949,"ĠJoshua":15950,"Ġfreely":15951,"alla":15952,"Ġloyalty":15953,"Ġfeminist":15954,"ĠHugo":15955,"ĠPÃ©":15956,"Ġavailability":15957,"Ġrepeat":15958,"Ġmere":15959,"Ġorganisms":15960,"ĠEdgar":15961,"ĠBren":15962,"ĠPreviously":15963,"arde":15964,"ĠLeicester":15965,"Ġunity":15966,"Ġclassroom":15967,"Ġfiscal":15968,"Ġ1839":15969,"1992":15970,"Ã±o":15971,"Ġcomedian":15972,"ogo":15973,"ĠCi":15974,"asis":15975,"ndez":15976,"Ġcommunicate":15977,"ĠMarian":15978,"affe":15979,"ĠCongreg":15980,"ĠEaster":15981,"roleum":15982,"ĠHannah":15983,"liter":15984,"Ġexplaining":15985,"anskrit":15986,"ĠLif":15987,"ĠRebec":15988,"ĠCurrent":15989,"ĠThames":15990,"ĠHood":15991,"ĠYankees":15992,"ubble":15993,"Ġprincess":15994,"Ġnarrowly":15995,"ĠPeng":15996,"Ġautomobile":15997,"aram":15998,"ĠNigerian":15999,"ilateral":16000,"ĠCommercial":16001,"PG":16002,"ĠChal":16003,"Ġamalg":16004,"ĠGospel":16005,"Japan":16006,"Ġore":16007,"Ġlanes":16008,"ĠJessica":16009,"ĠJulie":16010,"ĠGaelic":16011,"asma":16012,"Ġmaneu":16013,"Ġfreed":16014,"Ġreviewer":16015,"plus":16016,"Ġreinforced":16017,"berger":16018,"ochem":16019,"Ġgranite":16020,"mons":16021,"Ġsnake":16022,"Ġorganizing":16023,"ĠMaxim":16024,"Ġvolcanic":16025,"Ġunderneath":16026,"ĠNu":16027,"tail":16028,"ilogy":16029,"Ġmachinery":16030,"ĠTennis":16031,"ĠRas":16032,"ĠBrom":16033,"ĠTuesday":16034,"Michael":16035,"Ġtraced":16036,"Then":16037,"ĠGur":16038,"imeter":16039,"ĠInstitution":16040,"ĠPopular":16041,"Ġmechanics":16042,"aceous":16043,"Ġcurved":16044,"ĠCustom":16045,"United":16046,"gs":16047,"ĠBelle":16048,"Ġsubstr":16049,"Ġviolation":16050,"Ã¢n":16051,"acey":16052,"Ġenclosed":16053,"ĠIndustries":16054,"Ass":16055,"opy":16056,"Ġtransmitter":16057,"leen":16058,"ashtra":16059,"ĠLay":16060,"usa":16061,"ĠShi":16062,"Ġladies":16063,"Ġinterference":16064,"Ġdivine":16065,"umen":16066,"Ġwand":16067,"OD":16068,"Ġprecise":16069,"oya":16070,"Ġye":16071,"oub":16072,"Ġcrystal":16073,"Ġbesides":16074,"atham":16075,"elic":16076,"center":16077,"ascar":16078,"isers":16079,"pse":16080,"Ġspreading":16081,"ĠScots":16082,"Ann":16083,"Ġdup":16084,"Ġstiff":16085,"1960":16086,"ĠSlovakia":16087,"Ġinstantly":16088,"Ġwonderful":16089,"Miss":16090,"Ġconviction":16091,"Ġpleased":16092,"Ġdign":16093,"Ġinception":16094,"Ġenthusi":16095,"ĠDerek":16096,"Ġdeer":16097,"Ġwebsites":16098,"Ġlens":16099,"Ġundertook":16100,"Ġreconnaissance":16101,"ĠMeh":16102,"anco":16103,"ĠMetal":16104,"onica":16105,"Ġ('":16106,"ĠKnox":16107,"ĠSoftware":16108,"Ġeveryday":16109,"ĠAmanda":16110,"conn":16111,"ĠFo":16112,"Ġrope":16113,"rea":16114,"along":16115,"Ġnerve":16116,"ĠCharleston":16117,"cestershire":16118,"Ġemail":16119,"ilee":16120,"Ġdefines":16121,"Ġbackup":16122,"Im":16123,"avern":16124,"ĠThanks":16125,"ĠArn":16126,"Ġmarginal":16127,"Ġthreatening":16128,"Ġjealous":16129,"ĠHerzegovina":16130,"Ġdesp":16131,"Ġrobot":16132,"ĠKosovo":16133,"ĠJal":16134,"ĠShen":16135,"Ġherb":16136,"party":16137,"ĠLithuanian":16138,"Ġelimination":16139,"Ġmetall":16140,"Ġplural":16141,"Ġshit":16142,"ĠClear":16143,"Ġdevelops":16144,"hee":16145,"Ġpersuaded":16146,"Ġparticle":16147,"Ġrequests":16148,"ĠTravel":16149,"Ġ160":16150,"Ġcategor":16151,"Ġ1832":16152,"isely":16153,"Ġreply":16154,"Ġslee":16155,"Ġsitcom":16156,"ĠSM":16157,"Ġdemo":16158,"Ġscreening":16159,"Ġmammals":16160,"ĠMacedonia":16161,"ĠConstantinople":16162,"Ġfiber":16163,"ĠNixon":16164,"Âłmph":16165,"Ġ1842":16166,"Ġleased":16167,"electric":16168,"ĠAnders":16169,"Ġcommerce":16170,"ĠBj":16171,"sil":16172,"thel":16173,"ĠSuperior":16174,"ĠCrawford":16175,"rag":16176,"arag":16177,"Ġ),":16178,"Ġflies":16179,"Ġdear":16180,"Ġlecture":16181,"ĠUlster":16182,"iem":16183,"Ġbol":16184,"Tom":16185,"ĠLey":16186,"urned":16187,"Ġrevel":16188,"WC":16189,"script":16190,"Ġspelling":16191,"Ġhealthcare":16192,"Blue":16193,"ĠWinc":16194,"Ġindie":16195,"osal":16196,"ĠNotes":16197,"lette":16198,"ischer":16199,"Ġmasters":16200,"ĠTheodore":16201,"ĠElliott":16202,"igi":16203,"Ġpartnered":16204,"Ġautobiography":16205,"fiction":16206,"Ġmeter":16207,"ĠBaldwin":16208,"Ġapartments":16209,"Ġmonuments":16210,"ĠScreen":16211,"ĠBagh":16212,"Ġintim":16213,"Ġforehead":16214,"Ġpupil":16215,"ĠLon":16216,"Ġdiplomat":16217,"Ġnursing":16218,"ĠWinnipeg":16219,"Ġcruise":16220,"orum":16221,"ĠStefan":16222,"ĠYugoslav":16223,"Ġbowling":16224,"Ġhectares":16225,"Ġshells":16226,"ĠBurke":16227,"Ġjacket":16228,"adic":16229,"ĠMaid":16230,"Ġrisks":16231,"Ġmodes":16232,"ĠYemen":16233,"space":16234,"Ġwarriors":16235,"ĠÃĹ":16236,"ĠNewman":16237,"Ġcongressional":16238,"ĠCB":16239,"ĠGul":16240,"Ġeaten":16241,"Ġdiamond":16242,"ĠIz":16243,"ĠDivis":16244,"atri":16245,"Ġrely":16246,"Ġjumping":16247,"UP":16248,"Ġmills":16249,"Ġ1835":16250,"Ġequality":16251,"Ġenacted":16252,"ĠCairo":16253,"ĠPor":16254,"Ġprofessionally":16255,"entin":16256,"Ġbund":16257,"Ġsupern":16258,"ĠRup":16259,"ĠReagan":16260,"Res":16261,"Ġalumni":16262,"AAF":16263,"char":16264,"Ġbutterfly":16265,"ãĤ":16266,"Ġinfant":16267,")\".":16268,"ĠClara":16269,"Ġmonop":16270,"Ġcit":16271,"luence":16272,"bye":16273,"ĠHero":16274,"ĠRiv":16275,"Ġfake":16276,"âĢĶâĢĿ":16277,"clesiastical":16278,"anium":16279,"ĠBronze":16280,"ĠCamer":16281,"ĠJohns":16282,"ĠTotal":16283,"Ġcharted":16284,"Ġinstructed":16285,"Ġconcess":16286,"ĠSeth":16287,"Ġterrible":16288,"ĠBallet":16289,"stroke":16290,"ĠPlanet":16291,"Ġsatisfied":16292,"Ġmeasurement":16293,"ylon":16294,"ĠBuilt":16295,"ĠThunder":16296,"Ġsuggestion":16297,"Ġharvest":16298,"ĠJaneiro":16299,"Rol":16300,"ĠBavaria":16301,"ĠHave":16302,"Tur":16303,"Roman":16304,"Ġqualities":16305,"ĠHann":16306,"ĠInside":16307,"Ġenhance":16308,"Ġreasonable":16309,"ĠJohnston":16310,"Ġexplicitly":16311,"eches":16312,"ĠKenny":16313,"Ġdancers":16314,"ignt":16315,"ĠWolver":16316,"ĠRosa":16317,"Mic":16318,"Ġhomeless":16319,"umbered":16320,"ĠHoll":16321,"Ġregret":16322,"Ġemissions":16323,"human":16324,"Ġwheat":16325,"Ġfinite":16326,"Ġannoy":16327,"rews":16328,"beit":16329,"Ġunm":16330,"Ġcivic":16331,"ĠAlgeria":16332,"ĠClassical":16333,"RNA":16334,"Ġadvances":16335,"ĠWei":16336,"inge":16337,"Ġvacc":16338,"Ġtermed":16339,"atro":16340,"ĠCalvin":16341,"Ġdelight":16342,"president":16343,"Ġboom":16344,"ĠSouthampton":16345,"iker":16346,"say":16347,"Ġpant":16348,"Ġsod":16349,"Ġbra":16350,"ĠLouisville":16351,"Ġextraordinary":16352,"colspan":16353,"ĠSard":16354,"Alex":16355,"Ġchecked":16356,"TH":16357,"Ġfinest":16358,"ĠSap":16359,"ĠLearning":16360,"ĠKot":16361,"Ġabrupt":16362,"Ġcountryside":16363,"Ġchoices":16364,"ĠRebecca":16365,"Ġseventeen":16366,"Ġgig":16367,"Ġoversee":16368,"Ġscreened":16369,"Ġcertification":16370,"some":16371,"Ġantiqu":16372,"hydro":16373,"Ã½":16374,"Ġcommissioner":16375,"beck":16376,"Ġdug":16377,"ĠDrug":16378,"Ġappealed":16379,"Ġ118":16380,"Ġrocky":16381,"ĠRid":16382,"Ġsemin":16383,"ĠBundes":16384,"istically":16385,"ĠRocky":16386,"ĠMarshal":16387,"Ġproviders":16388,"Ġincom":16389,"Ġskilled":16390,"Ġaccredited":16391,"Ġrailways":16392,"Ġank":16393,"ĠStephan":16394,"inate":16395,"Ġdesigners":16396,"ĠBerm":16397,"Ġcorrespondence":16398,"Ġdetection":16399,"inging":16400,"Ġbicycle":16401,"ESCO":16402,"Ġfus":16403,"Ġamendment":16404,"Ġwelcomed":16405,"City":16406,"ĠFalk":16407,"Ġchron":16408,"ĠWinston":16409,"Ġumb":16410,"Ġfusion":16411,"atsu":16412,"ĠTrue":16413,"ĠWC":16414,"ĠGrammar":16415,"Ġlateral":16416,"ĠMongol":16417,"ĠNass":16418,"Ġexpectations":16419,"ĠDevil":16420,"Ġ1843":16421,"Ġdisputes":16422,"ĠWonder":16423,"ĠNiel":16424,"ĠBeatles":16425,"\"\",":16426,"omal":16427,"ĠAven":16428,"Ġ~":16429,"ĠHab":16430,"gage":16431,"Ġfears":16432,"ĠTru":16433,"Ġchin":16434,"Our":16435,"President":16436,"1991":16437,"ĠNum":16438,"Ġenlarged":16439,"ĠRosen":16440,"playing":16441,"Ġmissionaries":16442,"Ġstarter":16443,"ĠVit":16444,"width":16445,"EG":16446,"ĠSons":16447,"Ġteaches":16448,"Ġcomplained":16449,"ĠAchie":16450,"ĠFranÃ§ois":16451,"ĠDrum":16452,"Charles":16453,"onnell":16454,"eur":16455,"ĠKad":16456,"Ġstruggles":16457,"ĠChilean":16458,"ĠKeep":16459,"wrote":16460,"Ġeditors":16461,"Ġteenager":16462,"Dan":16463,"Ġtubes":16464,"artime":16465,"MD":16466,"ĠZion":16467,"uku":16468,"ommission":16469,"Ġcoordinates":16470,"ĠLut":16471,"ĠWeather":16472,"alore":16473,"Ġmentor":16474,"Ġvest":16475,"Ġprosecution":16476,"amous":16477,"Ġsimul":16478,"Ġimmigrant":16479,"Ġlicence":16480,"ml":16481,"Ġinterrog":16482,"Ġexpertise":16483,"ĠMichelle":16484,"ĠSpeedway":16485,"ĠHors":16486,"Ġpostp":16487,"Ġnobility":16488,"ataka":16489,"Ġfreshman":16490,"ĠThings":16491,"Ġinstances":16492,"Ġstrongest":16493,"ĠHut":16494,"ĠPrussian":16495,"uine":16496,"ĠUSS":16497,"itate":16498,"ĠHil":16499,"Ġsettling":16500,"ĠBelt":16501,"reshold":16502,"Ġframes":16503,"Ġequations":16504,"With":16505,"ĠMarin":16506,"Ġsurveillance":16507,"á¸":16508,"Ġcrafts":16509,"Ġspawn":16510,"sim":16511,"ĠTell":16512,"Ġtrainer":16513,"alie":16514,"ĠGodd":16515,"Ġsafely":16516,"Ġconsecrated":16517,"Ġfright":16518,"ĠSit":16519,"ĠStalin":16520,"Ġaccent":16521,"prof":16522,"rove":16523,"Ġinstitutional":16524,"ĠMoney":16525,"ĠGovern":16526,"Ġcollector":16527,"Ġasleep":16528,"Ġsophistic":16529,"Ġweakness":16530,"Mel":16531,"Ġfundra":16532,"Ġhighways":16533,"Ġterminated":16534,"Ġally":16535,"Ġtransmitted":16536,"ĠDorothy":16537,"Ġdwell":16538,"Ġrecall":16539,"lebrit":16540,"atican":16541,"amer":16542,"ĠKashmir":16543,"rays":16544,"ĠBun":16545,"Ġslip":16546,"chel":16547,"ĠYuan":16548,"Ġfever":16549,"rice":16550,"ĠHelena":16551,"Ġvert":16552,"roximately":16553,"hammed":16554,"enic":16555,"ĠRecording":16556,"Ġprotocol":16557,"Ġshaft":16558,"ĠProgramme":16559,"Ġsher":16560,"Ġflav":16561,"Ġfirmly":16562,"ĠLip":16563,"ĠSmashwords":16564,"Ġpaths":16565,"Ġgeometry":16566,"Ġsphere":16567,"aines":16568,"Ġcommanders":16569,"Ġaddresses":16570,":#":16571,"olin":16572,"anya":16573,"ĠPars":16574,"Ġspacecraft":16575,"su":16576,"Ġdecorative":16577,"Ġinquiry":16578,"Ġcorrel":16579,"Ġprofits":16580,"geons":16581,"eapolis":16582,"Ġbrass":16583,"Ġdozens":16584,"Note":16585,"isure":16586,"Ġstir":16587,"ĠLudwig":16588,"Ġexpenses":16589,"ĠCasey":16590,"lebrities":16591,"ĠStreets":16592,"ĠMalaysian":16593,"Ġlivestock":16594,"ĠBhar":16595,"ĠOpt":16596,"ĠÄĲ":16597,"Ġfossils":16598,"!\",":16599,"ĠTrip":16600,"Ġcognitive":16601,"chant":16602,"iliation":16603,"Ġconsumed":16604,"Live":16605,"Two":16606,"ĠKre":16607,"ĠJulius":16608,"ĠJoel":16609,"Ġlinking":16610,"ĠBatt":16611,"dec":16612,"amba":16613,"ĠATP":16614,"Ġunders":16615,"arriers":16616,"Ġstrain":16617,"ĠAppe":16618,"Ġportfolio":16619,"Ġcomplexity":16620,"ĠPicture":16621,"ĠSuk":16622,"ĠSherman":16623,"Ġencounters":16624,"Ġschemes":16625,"Ġinvention":16626,"elihood":16627,"Ġreson":16628,"Ġ[...]":16629,"Ġrefurb":16630,"ĠCourse":16631,"ĠQuinn":16632,"orters":16633,"Ġcolleague":16634,"Ġblame":16635,"bling":16636,"ĠIndo":16637,"Ġaccepting":16638,"KA":16639,"ikk":16640,"rimin":16641,"Hy":16642,"Ġchassis":16643,"agogue":16644,"Ġpistol":16645,"breaking":16646,"ĠSyrac":16647,"Ġillustrations":16648,"Ġheating":16649,"unnels":16650,"rella":16651,"ĠNewfound":16652,"ĠCarlo":16653,"Ġmaritime":16654,"ĠMoor":16655,"Ġtracking":16656,"ĠNASCAR":16657,"Ġremarked":16658,"sburg":16659,"iw":16660,"Ġjuven":16661,"ĠSed":16662,"arsity":16663,"ĠTreasury":16664,"Ġcapturing":16665,"Ġthy":16666,"girl":16667,"general":16668,"Rep":16669,"ĠWWE":16670,"Ġethn":16671,"Ġmeasurements":16672,"ĠColony":16673,"esque":16674,"ĠSpect":16675,"irling":16676,"inisc":16677,"ĠUnderg":16678,"Ġfence":16679,"Ġmock":16680,"Ġwarrior":16681,"ostic":16682,"Ġsubstantially":16683,"ĠDubai":16684,"Ġinvestments":16685,"ĠBast":16686,"assic":16687,"Ġsupposedly":16688,"ĠLily":16689,"ĠCoch":16690,"Ġhealing":16691,"ĠAlmost":16692,"Ġporn":16693,"Ġriot":16694,"apor":16695,"Ġdrainage":16696,"ĠAlg":16697,"iba":16698,"Ġcylinder":16699,"Ġcombining":16700,"Ġsimilarities":16701,"titled":16702,"ĠYard":16703,"ĠLap":16704,"ĠTrinidad":16705,"ĠLLC":16706,"ĠAmateur":16707,"ĠCool":16708,"Ġteamed":16709,"ĠFerry":16710,"Ġours":16711,"clip":16712,"Comp":16713,"dad":16714,"anan":16715,"Enter":16716,"Pac":16717,"ĠUz":16718,"ĠBurma":16719,"âĢĻ,":16720,"Ġ900":16721,"Ġdestroyer":16722,"ĠDeut":16723,"WS":16724,"Ġtheaters":16725,"Ġembassy":16726,"olithic":16727,"Ġapplies":16728,"Ġassert":16729,"ĠScandin":16730,"Ġbroader":16731,"cidae":16732,"Ġwagon":16733,"agged":16734,"Ġsued":16735,"Ġtelesc":16736,"Ġscorer":16737,"Ġlac":16738,"Ġblamed":16739,"Ġrip":16740,"third":16741,"ariat":16742,"ĠRaz":16743,"Mo":16744,"clair":16745,"Ġchaired":16746,"ĠCay":16747,"ĠCombat":16748,"Ġutilized":16749,"idding":16750,"Ġgains":16751,"ĠFur":16752,"ĠKerry":16753,"Âłp":16754,"Ġstatues":16755,"gency":16756,"ĠEdwin":16757,"ĠKrishna":16758,"Ġouts":16759,"Ġexceptions":16760,"ĠRaja":16761,"Ġchoosing":16762,"actor":16763,"wyn":16764,"otherap":16765,"Ġcelebrations":16766,"ĠOverall":16767,"inki":16768,"Ġquantity":16769,"Ġemployer":16770,"ĠAberdeen":16771,"ĠWalsh":16772,"ĠBudapest":16773,"rob":16774,"Ġtoile":16775,"Ġpeas":16776,"ĠVish":16777,"Ġprogressed":16778,"Ġmistaken":16779,"Ġdescendant":16780,"court":16781,"ĠâĢĻ":16782,"Ġequity":16783,"Ġresided":16784,"Ba":16785,"itars":16786,"NR":16787,"')":16788,"ĠSicily":16789,"ĠParagu":16790,"ĠDouble":16791,"Ġgrammar":16792,"Ġgarnered":16793,"isor":16794,"ĠInspector":16795,"normal":16796,"Ġviolations":16797,"forest":16798,"Ġclearing":16799,"ĠGates":16800,"Ġintelligent":16801,"ĠYa":16802,"ĠSantos":16803,"ĠSind":16804,"Ġshipped":16805,"Ġpursuing":16806,"ĠViv":16807,"Ġincorrect":16808,"Ġlacking":16809,"ritz":16810,"atz":16811,"ĠZen":16812,"agedy":16813,"ĠTyr":16814,"cliffe":16815,"Ġecosystem":16816,"tw":16817,"ĠHank":16818,"Tunes":16819,"ĠAndrea":16820,"ĠInsurance":16821,"ĠPere":16822,"Ġamazing":16823,"Ġvolcano":16824,"Ġinvestigating":16825,"amby":16826,"ĠXbox":16827,"Ġphases":16828,"ĠDart":16829,"leigh":16830,"ĠCho":16831,"Ġfant":16832,"Ġattained":16833,"ĠVin":16834,".),":16835,"ĠRox":16836,"Sil":16837,"Cr":16838,"Ġpercussion":16839,"Ġconstitute":16840,"gree":16841,"communications":16842,"ĠRica":16843,"ĠGreene":16844,"ĠUttar":16845,"Ġric":16846,"ĠBrowns":16847,"ĠStatistical":16848,"Ġglob":16849,"ĠLed":16850,"pherd":16851,"Ġcombine":16852,"ĠRT":16853,"ĠAppeals":16854,"Ġshrub":16855,"ĠAshley":16856,"uana":16857,"ĠSelf":16858,"ĠKids":16859,"Ġtalented":16860,"Ġloaned":16861,"Ġspun":16862,"neum":16863,"ĠEmploy":16864,"ĠSugar":16865,"Ġtar":16866,"White":16867,"Ġcheer":16868,"Ġanthology":16869,"jord":16870,"Ġexcluded":16871,"Ġshaking":16872,"Ġspy":16873,"raltar":16874,"Ġteachings":16875,"ĠNewfoundland":16876,"olving":16877,"Ġinfected":16878,"Ġprolific":16879,"ĠSyracuse":16880,"ardment":16881,"Ġpir":16882,"orian":16883,"Ġbark":16884,"ingen":16885,"ĠEye":16886,"ĠPhilharm":16887,"Ġtuber":16888,"ĠBras":16889,"ĠLarge":16890,"Ġwarrant":16891,"ramid":16892,"ĠCul":16893,"auf":16894,"Mac":16895,"Ġdepr":16896,"Ġthumb":16897,"Frank":16898,"ĠMob":16899,"evo":16900,"Ġmollusk":16901,"Ġrows":16902,"Ġtoxic":16903,"Ġparameters":16904,"Up":16905,"Ġcycling":16906,"imi":16907,"ĠCriminal":16908,"Ġlov":16909,"abul":16910,"Ġsmugg":16911,"Ġstance":16912,"Ġenabling":16913,"ĠStrong":16914,"FS":16915,"osion":16916,"ĠBri":16917,"ĠSandy":16918,"Ġencouraging":16919,"ipel":16920,"Ġlegitimate":16921,"Ha":16922,"ĠMaxwell":16923,"Ġsandstone":16924,"Î»":16925,"Ġinformal":16926,"ignty":16927,"ĠChiefs":16928,"Ġcorners":16929,"Ġmetabol":16930,"Bre":16931,"ĠPall":16932,"ĠPatriots":16933,"Ġdiagnosis":16934,"Ġengaging":16935,"Ġapplying":16936,"ĠCounties":16937,"Ġrankings":16938,"ĠMathematics":16939,"Ġlod":16940,"ĠVery":16941,"Ġvoluntary":16942,"Ġuprising":16943,"Ġwatershed":16944,"mud":16945,"ĠAdolf":16946,"ergarten":16947,"Ġhalls":16948,"Ġcomparable":16949,"ĠGriffith":16950,"Ġvalued":16951,"auna":16952,"Ġproc":16953,"Ġplaywright":16954,"Ġbanner":16955,"Ġdome":16956,"marine":16957,"ĠCham":16958,"ĠThr":16959,"Ġcheese":16960,"ĠArms":16961,"oces":16962,"ĠKiss":16963,"Ġdiffers":16964,"Ġresolve":16965,"Ġdistances":16966,"ĠHolocaust":16967,"plant":16968,"atisf":16969,"Ġtheor":16970,"ĠSummit":16971,"Ġmelod":16972,"Ġlyric":16973,"heart":16974,"specific":16975,"arthy":16976,"Ġgren":16977,"Ġinsect":16978,"reation":16979,"ĠUruguay":16980,"ĠMinneapolis":16981,"ĠBash":16982,"Ġcorporations":16983,"Ġchase":16984,"Ġcannon":16985,"Ġstriker":16986,"Ġreef":16987,"arte":16988,"ledon":16989,"Ġreflection":16990,"Ġadjoin":16991,"UR":16992,"named":16993,"Ġteenage":16994,"ĠObservatory":16995,"Ġencoded":16996,"ĠStatistics":16997,"ĠFlag":16998,"ĠLaf":16999,"etz":17000,"church":17001,"ĠDong":17002,":\"":17003,"wheel":17004,"arrie":17005,"igration":17006,"Ġoverhead":17007,"ĠAdult":17008,"Ġelectronics":17009,"ĠHomer":17010,"clamation":17011,"Ġdiscussing":17012,"ĠConcert":17013,"Ġrecreation":17014,"Ġjewel":17015,"spring":17016,"ĠConstitutional":17017,"ĠEurovision":17018,"Ġsab":17019,"Ġ102":17020,"Ġregained":17021,"Ġbtn":17022,"control":17023,"Ġheated":17024,"Ġbust":17025,"Ġcontrary":17026,"Ġprizes":17027,"ĠOutside":17028,"Ġcourty":17029,"Ġcharitable":17030,"ĠDock":17031,"1989":17032,"Ġnevertheless":17033,"ĠJi":17034,"Ġfails":17035,"Ġcontributor":17036,"Ġasc":17037,"dig":17038,"ĠEdge":17039,"bred":17040,"Ġhappiness":17041,"ĠSE":17042,"Ġoutfit":17043,"Ġimper":17044,"Ġsnapped":17045,"quez":17046,"Ġwards":17047,"Ġliner":17048,"Ġreflecting":17049,"dep":17050,"ĠMonth":17051,"Ġreversed":17052,"Ġpowder":17053,"ede":17054,"ĠGlac":17055,"advant":17056,"ĠArist":17057,"Ġanat":17058,"ĠMeyer":17059,"ĠMile":17060,"Ġseas":17061,"Ġbarg":17062,"Ġplaque":17063,"Ġimprov":17064,"Ġbombers":17065,"Ġdoctoral":17066,"Ġinteractive":17067,"odynam":17068,"ÅĻ":17069,"ĠLegal":17070,"Ġeager":17071,"ĠPos":17072,"Ġfrozen":17073,"Ġdesperate":17074,"Ġcorrespondent":17075,"getown":17076,"Ġportal":17077,"ĠPierce":17078,"Ġ1815":17079,"ĠGM":17080,"Ġmathematic":17081,"Ġexcit":17082,"ĠAG":17083,"Ġorgans":17084,"ĠCod":17085,"HO":17086,"Ġpublishes":17087,"ĠVatican":17088,"ogene":17089,"ĠHond":17090,"Ġaesthetic":17091,"ĠRather":17092,"Ġshower":17093,"Ġconsulting":17094,"Ġconstituted":17095,"Ġdens":17096,"Ġstems":17097,"Ġtactical":17098,"Ġremnants":17099,"Ġpenalties":17100,"egro":17101,"Ġrevenues":17102,"Ġcompetitor":17103,"ÙĦ":17104,"Ġrestr":17105,"ĠChoice":17106,"Ġstip":17107,"Ġseated":17108,"Ġsworn":17109,"Ġsketch":17110,"Ġplatinum":17111,"ĠManufact":17112,"haul":17113,"ĠMaya":17114,"Ġsystematic":17115,"Ġabd":17116,"ĠTrou":17117,"Ġresemble":17118,"Ġtrademark":17119,"oped":17120,"ĠHeavyweight":17121,"Peter":17122,"ĠCrom":17123,"Ġconstituencies":17124,"ĠHampton":17125,"ĠNortheast":17126,"Ġquantities":17127,"ĠBrock":17128,"taining":17129,"entric":17130,"usually":17131,"ĠRao":17132,"cro":17133,"jin":17134,"ĠOnline":17135,"ĠFiji":17136,"fred":17137,"Ġtendency":17138,"ĠFlet":17139,"Ġstun":17140,"Ġfavored":17141,"Ġdollar":17142,"ĠWhitney":17143,"Ġcuis":17144,"Ġpeaking":17145,"Ġcommands":17146,"Some":17147,"ingle":17148,"Ġchances":17149,"Ġeyeb":17150,"Ġabolition":17151,"Ġtrafficking":17152,"Ġboxer":17153,"Ġshowc":17154,"Ġdefault":17155,"Che":17156,"Ġdent":17157,"Ġwhit":17158,"Ġcontacted":17159,"oco":17160,"amph":17161,"controlled":17162,"Down":17163,"ĠJas":17164,"ĠBatman":17165,"ĠPu":17166,"Ġtends":17167,"Ġdialects":17168,"America":17169,"agascar":17170,"Ġjersey":17171,"Austral":17172,"ĠBerry":17173,"Ġhood":17174,"ĠContin":17175,"Ġpm":17176,"Ġtranslations":17177,"Ġvillagers":17178,"Ġmes":17179,"mitt":17180,"erical":17181,"Ġcrater":17182,"Ġsegreg":17183,"Ġatop":17184,"Ġshapes":17185,"ĠSomething":17186,"Ġupgrade":17187,"Ġtranslator":17188,"Ġunh":17189,"ĠConsequently":17190,"uddy":17191,"Ġcouncils":17192,"Ġadventures":17193,"ongs":17194,"iza":17195,"ĠShane":17196,"ĠZach":17197,"Ġdarker":17198,"upt":17199,"Ġexcessive":17200,"Ġdisciplines":17201,"BN":17202,"Ġbroadcaster":17203,"ĠHousing":17204,"ĠSteam":17205,"ĠUFC":17206,"ĠInnov":17207,"Ġrehears":17208,"ĠCloud":17209,"Ġunofficial":17210,"Ġsecuring":17211,"ĠHort":17212,"ÏĢ":17213,"Ġacids":17214,"Ġfitness":17215,"Part":17216,"Ġdeliberately":17217,"emia":17218,"bay":17219,"Ġspectators":17220,"Ġupdate":17221,"ĠPlus":17222,"Ġattributes":17223,"ĠGan":17224,"Ġguidelines":17225,"Ġlane":17226,"Journal":17227,"ĠSanskrit":17228,"ĠFerguson":17229,"ĠArr":17230,"ĠSham":17231,"Ġpottery":17232,"aston":17233,"Arthur":17234,"Ġreinforc":17235,"ĠiTunes":17236,"ĠAngela":17237,"Ġwicket":17238,"Ġalignment":17239,"Ġsubmarines":17240,"lore":17241,"Ġsentences":17242,"Ġfa":17243,"ĠGraduate":17244,"Ġknockout":17245,"Ġprints":17246,"ĠMiranda":17247,"oots":17248,"Ġamend":17249,"Ġmouse":17250,"Ġretaining":17251,"Ġwartime":17252,"ĠChange":17253,"ische":17254,"Ġsanctuary":17255,".).":17256,"ĠAcademic":17257,"Ġ1834":17258,"Ġshrine":17259,"estead":17260,"ieve":17261,"lamm":17262,"zym":17263,"Ġunemployment":17264,"iscount":17265,"lav":17266,"build":17267,"ĠHardy":17268,"Ġcruiser":17269,"Ġuniforms":17270,"ipzig":17271,"Ġlaughing":17272,"ĠAircraft":17273,"Ġdecoration":17274,"ĠBene":17275,"eterm":17276,"ĠIniti":17277,"ĠMerit":17278,"Ġdrops":17279,"Ġplantation":17280,"ĠLebanese":17281,"Ġcoupled":17282,"Ġmatched":17283,"Ġtechnological":17284,"Ġlengthy":17285,"ĠMercedes":17286,"Ġdamages":17287,"Ġcontestant":17288,"Ġdrinks":17289,"European":17290,"ĠCeramby":17291,"Ġimmune":17292,"arse":17293,"black":17294,"ĠMarqu":17295,"ĠUCLA":17296,"Ġstalk":17297,"ĠSalem":17298,"ĠCheng":17299,"ĠCaucas":17300,"Ġopted":17301,"ĠPresent":17302,"Ġarchives":17303,"ĠStrait":17304,"pot":17305,"Ġcelebrities":17306,"ĠMarco":17307,"Ġhatch":17308,"odied":17309,"Ġspecially":17310,"ĠTribune":17311,"Ġremake":17312,"inqu":17313,"ĠLinux":17314,"Ġregulatory":17315,"Ġdorsal":17316,"Ġgovernance":17317,"ĠTasmania":17318,"ĠRaiders":17319,"ĠPriv":17320,"ĠMarÃŃa":17321,"Ġpel":17322,"ä¸":17323,"ĠAIDS":17324,"ĠIndeed":17325,"ĠPotter":17326,"ĠKazakhstan":17327,"Ġscared":17328,"fund":17329,"Ġ($":17330,"ĠWillie":17331,"Ġmatching":17332,"Ġsir":17333,"iatus":17334,"ĠSylv":17335,"apo":17336,"Ġterrestrial":17337,"ĠKom":17338,"ĠFork":17339,"Ġmomentum":17340,"Ġende":17341,"Ġsealed":17342,"Ġrealised":17343,"Ġstern":17344,"ĠDre":17345,"ĠCopa":17346,"they":17347,"ĠMaggie":17348,"andi":17349,"Ġdecommission":17350,"Ã¢t":17351,"Er":17352,"mented":17353,"ĠAgu":17354,"Ġtended":17355,"Ġconcentrate":17356,"Ġdischarge":17357,"ĠCreative":17358,"ĠSofia":17359,"Ġwage":17360,"Ġstreaming":17361,"ĠCerambycidae":17362,"ĠLing":17363,"âĢĺ":17364,"Ġregulated":17365,"Ġweakened":17366,"Ġadvisory":17367,"ĠSally":17368,"acritic":17369,"Ġ1814":17370,"Ġlaunching":17371,"Ġmisc":17372,"Ġdoubled":17373,"Ġmelody":17374,"ĠMater":17375,"ĠChev":17376,"country":17377,"ĠDee":17378,"Ġplenty":17379,"Ġplacement":17380,"ĠAndrÃ©":17381,"Ġpublicity":17382,"Ġcleaning":17383,"ĠDuchy":17384,"Ġprivacy":17385,"ĠCancer":17386,"cats":17387,"ĠAthen":17388,"Ġsmiling":17389,"Ġidentifying":17390,"ĠGuatemala":17391,"Ġdean":17392,"LE":17393,"Ġ103":17394,"ĠSacramento":17395,"ĠBrandon":17396,"ĠGibraltar":17397,"nton":17398,"ĠClaude":17399,"ĠLisbon":17400,"Ġcomputing":17401,"ĠFemale":17402,"Ġmandatory":17403,"Ġguarantee":17404,"Cont":17405,"ĠThomson":17406,"ĠTah":17407,"ĠHook":17408,"Ġdawn":17409,"elves":17410,"Ġdissolution":17411,"ĠMaharashtra":17412,"section":17413,"ĠLor":17414,"iks":17415,"ĠJanet":17416,"Ġtrustees":17417,"CR":17418,"Ġimplies":17419,"HP":17420,"ĠNurs":17421,"Ġadequate":17422,"Ġguilt":17423,"Ġtightly":17424,"ĠLaur":17425,"ĠSuffolk":17426,"ulin":17427,"ĠConcord":17428,"ĠMarcel":17429,"Ġgeographic":17430,"ĠFelix":17431,"uder":17432,"ewater":17433,"ĠFuller":17434,"block":17435,"Ġseasonal":17436,"eros":17437,"Ġchicken":17438,"ĠElection":17439,"Ġprinc":17440,"ĠHolly":17441,"Ġbab":17442,"Ġsquadrons":17443,"Ġreformed":17444,"Ġinver":17445,"Ġtang":17446,"ĠUNESCO":17447,"ĠJackie":17448,"Ġbush":17449,"ĠCock":17450,"State":17451,"viv":17452,"ĠGreens":17453,"Ġcruel":17454,"Ġcass":17455,"Ġinch":17456,"Ġshouted":17457,"Ġintegrity":17458,"Ġsoftly":17459,"oqu":17460,"Ġhalt":17461,"ĠLook":17462,"Ġoccupy":17463,"Ġresting":17464,"Ġfulfill":17465,"ĠCaesar":17466,"Ġvillain":17467,"Ġtroop":17468,"Ġpublishers":17469,"insk":17470,"sworth":17471,"Ġobserve":17472,"Ġcoined":17473,"mare":17474,"Ġspear":17475,"Ġoath":17476,"ĠEmil":17477,"ĠMaritime":17478,"Ġslide":17479,"Ġdamn":17480,"arf":17481,"Ġabbey":17482,"Ġtales":17483,"Ġflooded":17484,"ologne":17485,"shine":17486,"Ġ***":17487,"Ġaided":17488,"Ġcurves":17489,"Ġpanic":17490,"Ġpaved":17491,"ĠResp":17492,"igion":17493,"Ġconting":17494,"branded":17495,"Ġanticipated":17496,"Ġpreference":17497,"Ġrust":17498,"Ġcort":17499,"ĠNone":17500,"rahim":17501,"Ġell":17502,"Ġpic":17503,"ĠMidland":17504,"ĠHundred":17505,"].":17506,"Ġperipher":17507,"ĠNicol":17508,"ĠAfterwards":17509,"ĠDul":17510,"Book":17511,"Ġeverywhere":17512,"Ġtonnes":17513,"urai":17514,"eppe":17515,"ben":17516,"Ġregards":17517,"ĠHumph":17518,"Ġmodifications":17519,"Ġinspection":17520,"heads":17521,"ĠGuadal":17522,"Sup":17523,"Ġpositioned":17524,"Ġfeast":17525,"Cor":17526,"ĠPopulation":17527,"rors":17528,"Ġaffiliation":17529,"Ġcheeks":17530,"Ġincorporate":17531,"Ġchromos":17532,"being":17533,"Ġsediment":17534,"ĠErnst":17535,"\"/":17536,"bris":17537,"Ġ1831":17538,"Ġmigrated":17539,"Ġsheets":17540,"vals":17541,"Ġaffection":17542,"Ġbits":17543,"ĠTanzania":17544,"Ġacute":17545,"asive":17546,"sometimes":17547,"Ġsteering":17548,"Ġlimitations":17549,"omore":17550,"2018":17551,"Ġfres":17552,"Ġreligions":17553,"Ġcraw":17554,"resses":17555,"izable":17556,"Ġwives":17557,"Ġthreshold":17558,"ĠCumberland":17559,"Ġinsurg":17560,"Ġcompass":17561,"nez":17562,"ĠTian":17563,"ĠBoris":17564,"rosse":17565,"Ġabsolutely":17566,"ĠSergeant":17567,"ĠPeg":17568,"ĠHul":17569,"Ġeducator":17570,"Ġtet":17571,"Min":17572,"Ġfreshwater":17573,"ĠBelow":17574,"Ġpresumably":17575,"ĠMald":17576,"shop":17577,"Ġreadily":17578,"Ġsubscript":17579,"Ġdifferential":17580,"loaded":17581,"ĠAugustus":17582,"lov":17583,"ĠRein":17584,"uga":17585,"Ġdetermination":17586,"From":17587,"iformesFamily":17588,"ĠAmb":17589,"ĠMonument":17590,"avity":17591,"ĠPM":17592,"His":17593,"ricia":17594,"Ġcomplaint":17595,"ĠEverything":17596,"Ġmidnight":17597,"ĠTelugu":17598,"ĠVander":17599,"Ġsummar":17600,"Ġscreens":17601,"ĠHonorary":17602,"Ġsnails":17603,"Ġmandate":17604,"city":17605,"Ġstripped":17606,"ĠKaw":17607,"Ġcried":17608,"Ġshouldn":17609,"issued":17610,"Ġtasked":17611,"Ġtooth":17612,"ĠBuk":17613,"Ġsailors":17614,"unciation":17615,"ĠHighland":17616,"Ġbomber":17617,"requ":17618,"ĠKind":17619,"nian":17620,"Ġskating":17621,"matic":17622,"jiang":17623,"Ġavoiding":17624,"Ġhated":17625,"ĠKatherine":17626,"Ġ104":17627,"ĠFantasy":17628,"1988":17629,"Neill":17630,"Ġrifles":17631,"Ġpurely":17632,"ĠTelegraph":17633,"ĠBreak":17634,"Ġfilmmaker":17635,"Ġwrist":17636,"ĠHast":17637,"Ġminers":17638,"enton":17639,"ĠEmpress":17640,"ĠWebb":17641,"Ġdeciding":17642,"Ġaffecting":17643,"Ġeffectiveness":17644,"ĠProvidence":17645,"running":17646,"Ġprotective":17647,"ĠSikh":17648,"ĠSilva":17649,"ooting":17650,"ĠTraff":17651,"PD":17652,"ĠBolivia":17653,"toire":17654,"ĠHeinrich":17655,"ĠLuck":17656,"Ġgrinned":17657,"Ġdy":17658,"iÄį":17659,"ĠEducational":17660,"UK":17661,"Ġprotesters":17662,"Ġforewings":17663,"Ġextant":17664,"ĠSophie":17665,"Ġmixing":17666,"look":17667,"Ġpants":17668,"amar":17669,"Ġcliff":17670,"lis":17671,"ĠSeg":17672,"Ġhammer":17673,"ĠChennai":17674,"Ġscholarly":17675,"ĠBuddha":17676,"ĠDowntown":17677,"kward":17678,"Ġgenerating":17679,"ĠCowboys":17680,"Ġpicking":17681,"ĠNorton":17682,"Ġboots":17683,"Ġsuperm":17684,"Ġhighlights":17685,"ĠPlains":17686,"Ġsprings":17687,"ĠPirates":17688,"ĠRifle":17689,"Ġanarch":17690,"ĠSenators":17691,"Ġembedded":17692,"iplinary":17693,"ĠMadras":17694,"ĠKoch":17695,"Ġcheap":17696,"boards":17697,"ogenic":17698,"ĠIntegr":17699,"ĠBulld":17700,"ĠDuff":17701,"ĠCarson":17702,"ĠDragons":17703,"enza":17704,"Ġcoordinator":17705,"ĠKarnataka":17706,"ifa":17707,"Ġdishes":17708,"ĠCommunication":17709,"Ġdisadvant":17710,"Ġmeteor":17711,"ĠTank":17712,"ivities":17713,"Ġprecurs":17714,"LR":17715,"antha":17716,"Ġenables":17717,"camp":17718,"ĠPitt":17719,"ĠJeffrey":17720,"Ġtunnels":17721,"ĠFiction":17722,"Ġclo":17723,"Ġcommercials":17724,"Ġdisappoint":17725,"Hel":17726,"Ã¨s":17727,"ĠExcellence":17728,"Ġevangel":17729,"ascular":17730,"Ġcorrectly":17731,"Ġisolation":17732,"Ġundef":17733,"uity":17734,"ĠMÄģ":17735,"ĠGA":17736,"Ġdramatically":17737,"Ġfinishes":17738,"ĠMadagascar":17739,"Ġacceptable":17740,"ĠQatar":17741,"cope":17742,"Ġspeculation":17743,"Ġfinancing":17744,"Ġsurveys":17745,"Ġcommemorate":17746,"ĠSag":17747,"nu":17748,"ller":17749,"attering":17750,"ĠNorwich":17751,"Ġsanction":17752,"Ġlion":17753,"eated":17754,"ĠCzechoslovakia":17755,"ĠIndoor":17756,"gang":17757,"ĠWaters":17758,"Ġcum":17759,"Ġridic":17760,"ĠStern":17761,"ĠPoly":17762,"Ġsovereignty":17763,"Ġabundant":17764,"ĠWid":17765,"Ġwoodland":17766,"ĠRoland":17767,"ĠHyder":17768,"ĠEmergency":17769,"Ġsidew":17770,"icist":17771,"izers":17772,"ĠTerminal":17773,"Ġunch":17774,"Ġerect":17775,"issues":17776,"Ġdetermining":17777,"Ġvegetables":17778,"Ġfeedback":17779,"Ġineff":17780,"ĠVall":17781,"fig":17782,"ĠBody":17783,"ĠWimb":17784,"innings":17785,"auth":17786,"ĠBengali":17787,"Ġharbor":17788,"Ġpartition":17789,"Ġcomeb":17790,"Ġ3000":17791,"Ġ1833":17792,"Ġvend":17793,"ĠGut":17794,"function":17795,"Ġsmoking":17796,"ĠWilm":17797,"ĠCore":17798,"Here":17799,"loo":17800,"neg":17801,"ointing":17802,"ĠMonica":17803,"ĠConstit":17804,"Ġdisappointed":17805,"athetic":17806,"ĠGandhi":17807,"ĠEva":17808,"ĠHack":17809,"Ġduck":17810,"great":17811,"ĠThan":17812,"ĠConfederation":17813,"Ġbeta":17814,"ĠCorpor":17815,"lance":17816,"Maybe":17817,"Count":17818,"Joseph":17819,"ĠCarey":17820,"Ġpromises":17821,"Ġdisplaced":17822,"ĠDixon":17823,"Äģd":17824,"ĠHawaiian":17825,"voy":17826,"iggins":17827,"zan":17828,"ĠPlain":17829,"itivity":17830,"Ġcooling":17831,"Ġideology":17832,"ĠTheory":17833,"Ġ).":17834,"ĠJag":17835,"atum":17836,"amon":17837,"Ġsor":17838,"Ġdelegate":17839,"Ġconsolidated":17840,"raphic":17841,"Ġbags":17842,"Ġshortened":17843,"Ġreminisc":17844,"Äħ":17845,"ĠMikh":17846,"ĠBombay":17847,"Os":17848,"ĠHence":17849,"ĠCoff":17850,"Ġmetals":17851,"ĠRussians":17852,"ĠPartners":17853,"ĠPatriarch":17854,"Ġradius":17855,"Ġamphib":17856,"By":17857,"ĠMorton":17858,"ĠErik":17859,"Ġresembles":17860,"etian":17861,"anto":17862,"Ġbeaches":17863,"Ġaug":17864,"terson":17865,"Med":17866,"Nor":17867,"leted":17868,"Ġcommentator":17869,"ĠPanthers":17870,"Ġodds":17871,"Ġclassrooms":17872,"Ġtraits":17873,"ĠJill":17874,"pex":17875,"ĠCastro":17876,"ĠVolume":17877,"ĠWik":17878,"arel":17879,"Ġexploring":17880,"bably":17881,"hardt":17882,"ĠAchievement":17883,"ĠAssociated":17884,"ronics":17885,"Bro":17886,"Ġsingular":17887,"Ġwireless":17888,"Bo":17889,"ĠMyan":17890,"Green":17891,"ĠEthan":17892,"ĠGardner":17893,"ĠGarc":17894,"Ġtaxi":17895,"ĠSlovak":17896,"ĠBess":17897,"Ġshoots":17898,"vir":17899,"ĠHed":17900,"Ġposthumously":17901,"Ġwashed":17902,"Richard":17903,"ĠJuda":17904,"ĠChronicle":17905,"VC":17906,"Ġglance":17907,"1985":17908,"ĠRhe":17909,"ĠFletcher":17910,"Ġteammates":17911,"Ġsuite":17912,"Chic":17913,"Ġowing":17914,"ĠNed":17915,"Ġdebris":17916,"Ġcultivated":17917,"Ġconfined":17918,"Ġfilter":17919,"Ġpersonalities":17920,"ĠFest":17921,"ĠHawks":17922,"Ġdomains":17923,"welling":17924,"ĠToul":17925,"club":17926,"ĠLaws":17927,"ĠLal":17928,"Ġplanets":17929,"Ġtalents":17930,"skirts":17931,"Ġexceptional":17932,"Ġsucceeding":17933,"Ġincomplete":17934,"ĠAlm":17935,"gence":17936,"ĠWander":17937,"Ġinsufficient":17938,"ĠSiber":17939,"Ġ106":17940,"Ġmedic":17941,"ĠTrevor":17942,"ĠIslander":17943,"ĠDawn":17944,"Ġnave":17945,"Ġatomic":17946,"ĠØ":17947,"Ġambitious":17948,"ĠMPs":17949,"ĠHelsinki":17950,"Ġaccepts":17951,"Ġevacuated":17952,"esp":17953,"DM":17954,"ods":17955,"ĠTurks":17956,"Ġloses":17957,"ĠEveryone":17958,"imar":17959,"uca":17960,"1987":17961,"Äģb":17962,"kal":17963,"Ġlith":17964,"Ġpressing":17965,"Grand":17966,"Ġrecommendation":17967,"ĠLeipzig":17968,"Ġlucky":17969,"ĠRandy":17970,"Ġaccessed":17971,"Ġgeneric":17972,"Ġgenuine":17973,"Ġfart":17974,"ĠVernon":17975,"Ġcov":17976,"sover":17977,"dict":17978,"ĠMyanmar":17979,"ĠMohammad":17980,"Ġunrest":17981,"Ġeleventh":17982,"film":17983,"Die":17984,"ĠFut":17985,"Ġaltogether":17986,"Ġadvocacy":17987,"ĠToyota":17988,"oche":17989,"Ġsigh":17990,"ĠBorder":17991,"Ġfrontier":17992,"Ġtwelfth":17993,"ĠWade":17994,"Ġpeaks":17995,"Ġsubmer":17996,"ĠOlivia":17997,"ĠStoke":17998,"ĠSaxony":17999,"Ġautonomy":18000,"War":18001,"itical":18002,"Ġreminded":18003,"Ġwarehouse":18004,"Ġdealer":18005,"ĠBolton":18006,"Ġmonk":18007,"midt":18008,"owl":18009,"erner":18010,"ĠST":18011,"After":18012,"ĠFan":18013,"adequ":18014,"rying":18015,"Ġcomplications":18016,"Ġfol":18017,"onduct":18018,"ĠÄĮ":18019,"zon":18020,"Ġfrequencies":18021,"ĠSou":18022,"Daily":18023,"ĠFed":18024,"lication":18025,"diocese":18026,"Ġcultivation":18027,"Ġhorm":18028,"ĠLub":18029,"ĠMetacritic":18030,"far":18031,"Ġconson":18032,"ĠAuto":18033,"Ġannexed":18034,"Ġdesigning":18035,"Ġdoorway":18036,"Ġintentions":18037,"lation":18038,"Âł...":18039,"zel":18040,"ĠGeorgetown":18041,"Ġemploys":18042,"Ġscreenwriter":18043,"Ġmotivated":18044,"Ġdances":18045,"ĠSpecies":18046,"Ġfierce":18047,"ĠOften":18048,"version":18049,"ĠNorthwestern":18050,"Ġbeats":18051,"ecute":18052,"Ġjam":18053,"Ġconsequently":18054,"ĠProgress":18055,"Ġlandscapes":18056,"Ġfaithful":18057,"ĠTul":18058,"armed":18059,"Ġgrin":18060,"tee":18061,"wal":18062,"Ġwages":18063,"News":18064,"ĠWimbledon":18065,"ulent":18066,"idian":18067,"ĠMÃ©":18068,"Ġscrew":18069,"Ġmath":18070,"Ġelevator":18071,"Ġjoke":18072,"ĠDion":18073,"ĠWorcester":18074,"frame":18075,"ĠEngineer":18076,"ĠEt":18077,"Ġdemolition":18078,"ĠHey":18079,"obo":18080,"Ġchocolate":18081,"obic":18082,"Ġanthe":18083,"Ġhab":18084,"Ġdwarf":18085,"anas":18086,"Ġdecent":18087,"Ġinscriptions":18088,"Ġinev":18089,"Ġdecisive":18090,"ĠMÃ¼":18091,"owners":18092,"Ġpled":18093,"shaw":18094,"ĠBergen":18095,"ĠSche":18096,"aky":18097,"Ġshake":18098,"ĠSharon":18099,"Ġclouds":18100,"Ġsuited":18101,"Henry":18102,"ĠKoh":18103,"Ġsexually":18104,"enstein":18105,"gart":18106,"Ġenzym":18107,"Sur":18108,"rones":18109,"horn":18110,"ĠPlease":18111,"ĠEuropeans":18112,"ĠMix":18113,"ophon":18114,"Ġadvantages":18115,"ĠShiva":18116,"Ġoversaw":18117,"ĠEstonian":18118,"rio":18119,"ĠAdmir":18120,"Ġkidnapped":18121,"ĠReverend":18122,"raul":18123,"Ġportrayal":18124,"Ð²":18125,"Mark":18126,"ĠJets":18127,"Ġyearly":18128,"ĠRican":18129,"Ġencompasses":18130,"ĠHits":18131,"ĠPharm":18132,"British":18133,"Ġtrigger":18134,"Ġunaware":18135,"ĠWins":18136,"Ġfellowship":18137,"IG":18138,"ĠBirth":18139,"Ġsake":18140,"Ġincons":18141,"ĠVaugh":18142,"Ġoutskirts":18143,"ĠBuild":18144,"arius":18145,"expl":18146,"Ġsoils":18147,"ĠTruth":18148,"ĠKlein":18149,"ĠWick":18150,"Ġcomeback":18151,"Ġsprint":18152,"Ġtwisted":18153,"Ġpep":18154,"atu":18155,"Ġtiming":18156,"Il":18157,"ku":18158,"ĠBoyd":18159,"esterday":18160,"emi":18161,"erville":18162,"Ġgraves":18163,"ĠGarcia":18164,"Ġtriangle":18165,"ĠKod":18166,"ĠPapua":18167,"Ġcatches":18168,"ithe":18169,"zburg":18170,"ĠWi":18171,"Ġfoster":18172,"1986":18173,"fi":18174,"opter":18175,"ourney":18176,"ĠGross":18177,"Ġovertime":18178,"ĠMadonna":18179,"Ġbreakthrough":18180,"kn":18181,"Ġstamp":18182,"ĠSmart":18183,"Ġensuing":18184,"Ġdried":18185,"ometric":18186,"Ġemployers":18187,"Ġchairs":18188,"epp":18189,"Ġnewsc":18190,"Ġbloody":18191,"larg":18192,"Ġfacto":18193,"ĠRafael":18194,"fields":18195,"ĠChemical":18196,"urgical":18197,"guard":18198,"NE":18199,"Ġstamps":18200,"ĠLeone":18201,"Ġwhereby":18202,"ĠSingle":18203,"Ġpent":18204,"Ġsuppose":18205,"Ġnarrator":18206,"Val":18207,"ĠFen":18208,"production":18209,"Ġbite":18210,"Ġpaired":18211,"Ġstained":18212,"Ġasserted":18213,"Ġanxiety":18214,"ĠNoah":18215,"Ġburnt":18216,"Ġengr":18217,"Ġhumanitarian":18218,"uni":18219,"Ġfut":18220,"ibia":18221,"Ġrigid":18222,"ĠMatch":18223,"ĠVed":18224,"ĠBuckingham":18225,"Ġrefuse":18226,"Ġdedication":18227,"ĠKolk":18228,"Ġincorporates":18229,"Ġdiscl":18230,"Ġgut":18231,"Ġsteadily":18232,"Ġemphasized":18233,"ĠTeams":18234,"Ġvalleys":18235,"ĠColeman":18236,"Ġexpecting":18237,"tures":18238,"ĠChapman":18239,"ĠJenkins":18240,"ĠAllies":18241,"Ġcollision":18242,"ĠSanto":18243,"iguous":18244,"ĠMarathon":18245,"rab":18246,"Ġuncommon":18247,"Ġpurchasing":18248,"ĠHost":18249,"Ġsophisticated":18250,"hao":18251,"ĠCologne":18252,"Ġpractically":18253,"ĠKiev":18254,"Ġsupervised":18255,"Ġpolymer":18256,"Î¼":18257,"ĠLatvia":18258,"Ġfunctioning":18259,"Ġirrit":18260,"ĠStories":18261,"TER":18262,"Ġdys":18263,"ĠWS":18264,"ĠXavier":18265,"antes":18266,"ĠJiang":18267,"Ã¡ndez":18268,"Ġsovereign":18269,"Ġretros":18270,"cyl":18271,"san":18272,"Ġformations":18273,"ortal":18274,"Ġincarn":18275,"boats":18276,"oner":18277,"ĠPhysical":18278,"Ġtensions":18279,"wy":18280,"stones":18281,"PI":18282,"national":18283,"ateful":18284,"ĠSD":18285,"ĠEleanor":18286,"itrogen":18287,"item":18288,"bourg":18289,"ieri":18290,"Ġcrest":18291,"Ġcourtyard":18292,"Ġkidney":18293,"Ġcottage":18294,"Ġsacked":18295,"ĠCotton":18296,"ĠMVP":18297,"Ġtoy":18298,"ĠDivisiÃ³n":18299,"Ġadditions":18300,"Ġbreakdown":18301,"ĠGian":18302,"Ġenvelop":18303,"ĠCameroon":18304,"Ġbail":18305,"Ġborrowed":18306,"Ġabbreviated":18307,"ĠBeyond":18308,"Ġloosely":18309,"ĠChemistry":18310,"Ġ1810":18311,"Ġimagery":18312,"site":18313,"arra":18314,"End":18315,"icating":18316,"Ġwondering":18317,"Ġvalve":18318,"prising":18319,"Ġexecutives":18320,"historic":18321,"ĠTitle":18322,"Ġuncomfort":18323,"ĠSue":18324,"Ġ1825":18325,"ĠLars":18326,"ĠBaden":18327,"ulative":18328,"Ġillumin":18329,"ĠCherry":18330,"ĠJenny":18331,"Ġethics":18332,"oren":18333,"bons":18334,"wara":18335,"ĠGeorges":18336,"Ġensuring":18337,"ĠTibetan":18338,"Ġdrift":18339,"ĠRCA":18340,"sha":18341,".\"\"":18342,"Ġamino":18343,"Ġcivilization":18344,"Ġneighbors":18345,"cot":18346,"leading":18347,"Ġmasses":18348,"ĠZam":18349,"Sk":18350,"ĠGunn":18351,"Ġasteroid":18352,"Ġlistened":18353,"eviÄĩ":18354,"ÈĽ":18355,"ĠLines":18356,"lide":18357,"iances":18358,"arton":18359,"ĠTin":18360,"Ġmim":18361,"aeus":18362,"ĠPhilharmonic":18363,"Pop":18364,"oine":18365,"Ġsinking":18366,"ĠVolunteer":18367,"Ġvacuum":18368,"owo":18369,"ĠBritt":18370,"Ġprofound":18371,"ĠZamb":18372,"Ġprevention":18373,"Ġunified":18374,"Ġmothers":18375,"Ġtreasure":18376,"ĠLoch":18377,"Ġsymbolic":18378,"Please":18379,"ĠCao":18380,"Ġsubtle":18381,"Jew":18382,"aird":18383,"Ġlaying":18384,"berra":18385,"Ġcollegiate":18386,"Ġdiox":18387,"Ġmonarchy":18388,"Ġsings":18389,"Ġsweat":18390,"Ġhire":18391,"Ġdecomp":18392,"ĠHistorically":18393,"Ġoval":18394,"ĠNuclear":18395,"ĠGeneration":18396,"brown":18397,"ĠPione":18398,"Ġreduces":18399,"Ġancestor":18400,"Ġchef":18401,"ĠPale":18402,"ĠTracy":18403,"ĠArchives":18404,"1984":18405,"âĪĴ":18406,"itational":18407,"ĠRip":18408,"ĠJacksonville":18409,"ĠSU":18410,"Ġcanceled":18411,"Ġcompromise":18412,"Ġ{":18413,"ĠColombian":18414,"ÃŃs":18415,"ermo":18416,"ĠBates":18417,"Ġanonymous":18418,"Ġsurvives":18419,"ĠLeopold":18420,"gender":18421,"ĠTucker":18422,"limited":18423,"Ġcompatible":18424,"arding":18425,"SE":18426,"ĠLik":18427,"ĠKÃ¶":18428,"ĠIX":18429,"Ġcontempor":18430,"Ġterrorism":18431,"Ġmodeling":18432,"Ġprimitive":18433,"ĠKens":18434,"ĠLibya":18435,"Ġinequ":18436,"1983":18437,"Ġrelied":18438,"Ġjack":18439,"NL":18440,"ĠEvan":18441,"Ġprecipitation":18442,"ĠFri":18443,"acies":18444,"ogl":18445,"ĠMake":18446,"uria":18447,"Ġincomp":18448,"Ġnegotiated":18449,"Ġretreated":18450,"Ġfaint":18451,"Ġmast":18452,"Ġgalleries":18453,"Ġcuisine":18454,"1950":18455,"ĠHammer":18456,"Rolling":18457,"Ġnit":18458,"Ġceremonial":18459,"ĠHonda":18460,"irs":18461,"ipelago":18462,"Ġbinary":18463,"ĠRule":18464,"Ġinsight":18465,"del":18466,"Ġbatsman":18467,"Ġingredients":18468,"Ġ\"-":18469,"ĠCitizens":18470,"ĠCambodia":18471,"kok":18472,"uline":18473,"Ġpioneering":18474,"ĠExeter":18475,"Ġguitars":18476,"Ġrealistic":18477,"Ġmotors":18478,"ĠHyde":18479,"ĠRotten":18480,"Ġsenator":18481,"Mc":18482,"Ġmotto":18483,"hampton":18484,"NO":18485,"ĠFreeman":18486,"Â½":18487,"ĠHawk":18488,"oids":18489,"ĠConrad":18490,"ocy":18491,"ĠOle":18492,"Ġunanimous":18493,"Ġdemonstrations":18494,"Ġlinguistic":18495,"Ġconfisc":18496,"Ġauxiliary":18497,"ĠElis":18498,"ĠTunnel":18499,"ĠBrend":18500,"ĠBard":18501,"ĠParamount":18502,"Ser":18503,"ĠMorm":18504,"ĠPhillip":18505,"Ġoffshore":18506,"Ġdefining":18507,"ĠTaj":18508,"Ġawkward":18509,"ĠSolar":18510,"ĠIss":18511,"Ġincorporating":18512,"ĠWit":18513,"ĠSib":18514,"hya":18515,"Ġcoeff":18516,"ĠVision":18517,"Ġvirtue":18518,"Ġoptional":18519,"Ġsupers":18520,"ĠNO":18521,"rowth":18522,"Ġtelevised":18523,"Ġguerr":18524,"obby":18525,"Ġcats":18526,"ĠNormandy":18527,"ĠVictory":18528,"Ġmourn":18529,"ĠKai":18530,"ĠNH":18531,"Ġcombines":18532,"ĠConservatory":18533,"Ġguaranteed":18534,"ĠInitiative":18535,"Ġsqueez":18536,"ĠSiles":18537,"Ġhelmet":18538,"KO":18539,"ĠEns":18540,"drop":18541,"ĠBeau":18542,"Ġhiatus":18543,"distance":18544,"phal":18545,"eight":18546,"Ġinterred":18547,"Ġtouching":18548,"ĠHuss":18549,"Ġswitching":18550,"ĠMontenegro":18551,"Ġmonkey":18552,"ĠDodgers":18553,"Ġplasma":18554,"tlement":18555,"Ġescapes":18556,"Ġdetention":18557,"Ġinheritance":18558,"Ġvisitor":18559,"otti":18560,"ĠKerr":18561,"Ġoutcomes":18562,"Ġsubjected":18563,"heed":18564,"Ġescal":18565,"except":18566,"ĠSidney":18567,"Ġmaiden":18568,"Ġattractions":18569,"ĠQuart":18570,"ilib":18571,"Ġforbidden":18572,"Ġclinic":18573,"Ġnucleus":18574,"Ġheal":18575,"Ġlighthouse":18576,"aic":18577,"Ġrented":18578,"pal":18579,"Ġexplosive":18580,"ĠHaiti":18581,"ĠPaper":18582,"ĠLun":18583,"Ġexamine":18584,"Bet":18585,"ervice":18586,"Ġadviser":18587,"Ġdeity":18588,"Ġthigh":18589,"ĠMLB":18590,"ĠReb":18591,"Ġ1821":18592,"Queen":18593,"ĠNE":18594,"Ġcyclone":18595,"ĠAstron":18596,"Ġcampuses":18597,"ĠLiterary":18598,"Ġawa":18599,"Ġclause":18600,"ĠTravis":18601,"Ġpour":18602,"ĠJoey":18603,"phones":18604,"ĠGreeks":18605,"ĠVisual":18606,"ĠNeed":18607,"ĠRag":18608,"Ġalert":18609,"ĠNazis":18610,"ĠMt":18611,"Ġambul":18612,"Ġcaves":18613,"ĠEnterprise":18614,"Ġlamp":18615,"Ġparody":18616,"anson":18617,"Ġfrowned":18618,"Ġimagination":18619,"arez":18620,"thon":18621,"ĠZhu":18622,"ĠEden":18623,"ĠVirt":18624,"Ġcurtain":18625,"ĠPriest":18626,"Ġinmates":18627,"actical":18628,"ankar":18629,"Ġpathway":18630,"Ġutter":18631,"ĠIbn":18632,"Ġbrush":18633,"abulary":18634,"Chief":18635,"ĠRS":18636,"Ġtips":18637,"Ã¢te":18638,"Off":18639,"umping":18640,"ĠOriental":18641,"Ġfinancially":18642,"igel":18643,"channel":18644,"Ġ?":18645,"ctica":18646,"series":18647,"ĠHew":18648,"Ġgaming":18649,"ĠMonter":18650,"ĠPremi":18651,"ĠUSC":18652,"ĠPoetry":18653,"Ġrecycl":18654,"ĠName":18655,"eted":18656,"ĠTaking":18657,"Ġflexible":18658,"ĠBaroque":18659,"Ġgambling":18660,"ĠTi":18661,"Ġsurroundings":18662,"Ġsuccesses":18663,"Ġmagnet":18664,"late":18665,"ĠDocument":18666,"ahr":18667,"Bad":18668,"thy":18669,"Ġecclesiastical":18670,"lew":18671,"Ġchat":18672,"occupied":18673,"ĠThirty":18674,"ĠAlexandra":18675,"uddin":18676,"Ġsufficiently":18677,"Ġincent":18678,"AD":18679,"ĠBehind":18680,"gio":18681,"Ġcompetes":18682,"agreb":18683,"Ġattain":18684,"Ġlabeled":18685,"cross":18686,"Ġirrigation":18687,"ĠEuropa":18688,"league":18689,"uitar":18690,"Ġarchive":18691,"Ġdeclining":18692,"lings":18693,"ĠHutch":18694,"rail":18695,"cutta":18696,"ĠRegular":18697,"Ġaffects":18698,"ĠBoat":18699,"Ġloading":18700,"Ġgravel":18701,"adays":18702,"Ġcompuls":18703,"inia":18704,"ĠEdu":18705,"Ġassured":18706,"Ġsearched":18707,"ĠElder":18708,"ĠDres":18709,"Ġconcentrations":18710,"Ġminds":18711,"Ġcontempl":18712,"Ġspokesman":18713,"Ġpilgrim":18714,"isans":18715,"Ġsolic":18716,"Ġrehabilitation":18717,"Act":18718,"ĠStrike":18719,"pez":18720,"ucci":18721,"fried":18722,"Connor":18723,"ĠIndigenous":18724,"Ġstew":18725,"ĠWings":18726,"Ġcriminals":18727,"placed":18728,"ogical":18729,"Ġpastoral":18730,"Ġreceptors":18731,"Ġexpend":18732,"Ġprolong":18733,"irable":18734,"Ġdownstream":18735,"ĠNicolas":18736,"ĠMarina":18737,"tex":18738,"Ġregain":18739,"Ġdelivering":18740,"Ġspells":18741,"ĠLeadership":18742,"Ġovernight":18743,"ĠRost":18744,"Ġliberation":18745,"ĠJup":18746,"Ġworlds":18747,"ĠPom":18748,"Ġruined":18749,"soon":18750,"Ġclusters":18751,"Ġassociates":18752,"Ġangel":18753,"ĠBroncos":18754,"Ġwholly":18755,"Ġ1828":18756,"ĠMare":18757,"ynom":18758,"unta":18759,"combe":18760,"ĠFighting":18761,"Ġspray":18762,"Ġrepertoire":18763,"Ġwaved":18764,"ĠBruno":18765,"Trans":18766,"Ġamended":18767,"Ġexciting":18768,"Ġinning":18769,"Ġforum":18770,"ĠWebster":18771,"Ġsponsors":18772,"ĠKell":18773,"Ġpacked":18774,"ĠWinchester":18775,"Ġcostumes":18776,"agnetic":18777,"ĠChurches":18778,"hausen":18779,"Ġdisability":18780,"grave":18781,"aciÃ³n":18782,"Ġoccupies":18783,"ĠPowers":18784,"Ġproportional":18785,"Ġoverlooking":18786,"Ġheavier":18787,"icol":18788,"Ġdonation":18789,"Us":18790,"Ġhalfway":18791,"ĠMalayalam":18792,"ĠHonours":18793,"Az":18794,"Ġdeclaring":18795,"ĠTourism":18796,"ĠUnderground":18797,"abbing":18798,"ĠLav":18799,"ĠCongressional":18800,"ako":18801,"Ġexpired":18802,"tem":18803,"Ġnas":18804,"Ġadul":18805,"Ul":18806,"Ġfond":18807,"engine":18808,"isse":18809,"Ġdisqual":18810,"Ġdemonstrating":18811,"Ġpageant":18812,"Ġfigured":18813,"ocide":18814,"Ġthrows":18815,"Ġtil":18816,"Ġalike":18817,"ĠPond":18818,"ĠEli":18819,"Ġdragged":18820,"Ġglobe":18821,"Ġsynchron":18822,"Ġ1824":18823,"oug":18824,"inked":18825,"Ġswift":18826,"ĠBrady":18827,"Ġacquiring":18828,"Ġprecisely":18829,"inde":18830,"Ġassessed":18831,"itas":18832,"Ġasset":18833,"Ġelong":18834,"Ġexhausted":18835,"Ġarmoured":18836,"open":18837,"Ġrelaxed":18838,"ĠFlem":18839,"Ġtreatments":18840,"Ġbride":18841,"rÃŃ":18842,"NG":18843,"ND":18844,"ĠMant":18845,"Ġunderwater":18846,"ĠDust":18847,"oso":18848,"ĠManch":18849,"uber":18850,"Ġpracticing":18851,"Christian":18852,"may":18853,"Ġparticipant":18854,"Ġexchanged":18855,"ĠReserv":18856,"ilingual":18857,"ĠToo":18858,"sten":18859,"Ġexcitement":18860,"Ġbranded":18861,"Ġsaves":18862,"Ġwash":18863,"ĠHollow":18864,"ĠStanding":18865,"ĠTud":18866,"ĠMunster":18867,"ĠMikhail":18868,"Ġhelicopters":18869,"Å¼":18870,"ĠMcCarthy":18871,"Ġreside":18872,"Ġcollaborative":18873,"ĠAlleg":18874,"Ġvacation":18875,"ĠSV":18876,"Ġcrying":18877,"Ġcrust":18878,"Ġatoms":18879,"ardy":18880,"actory":18881,"Ġmaker":18882,"ĠConnor":18883,"ĠHyderabad":18884,"gement":18885,"ĠAndroid":18886,"Ġstall":18887,"brother":18888,"eous":18889,"icism":18890,"Sun":18891,"Ġconform":18892,"Ġrepaired":18893,"Ġpreparations":18894,"Ġ107":18895,"ĠAgent":18896,"angs":18897,"ĠForbes":18898,"ĠGarcÃŃa":18899,"Ġmarriages":18900,"Ġfinalist":18901,"Ġquarterfinals":18902,"Ġmemorable":18903,"input":18904,"ĠFlash":18905,"otherapy":18906,"ĠKok":18907,"appropri":18908,"ĠChrys":18909,"ĠBasic":18910,"Ġinadequ":18911,"onc":18912,"ĠEmbass":18913,"ĠLeigh":18914,"Ġtransaction":18915,"ĠĠĠĠ":18916,"Ġsa":18917,"lli":18918,"show":18919,"hof":18920,"grass":18921,"Ġsuffix":18922,"Ġtextile":18923,"ĠGymn":18924,"ĠDiscovery":18925,"olphins":18926,"Ġplains":18927,"designated":18928,"Ġquot":18929,"Ã¢l":18930,"ĠâĪĴ":18931,"Ġconventions":18932,"ĠAviv":18933,"Work":18934,"ĠCanberra":18935,"ĠSutton":18936,"Ġriots":18937,"Ġdifferently":18938,"eco":18939,"Look":18940,"ĠButter":18941,"Ġram":18942,"Ġafterward":18943,"ectors":18944,"giving":18945,"=\"/":18946,"Ġunre":18947,"ĠKamp":18948,"ĠBin":18949,"Ġtab":18950,"Ġshorts":18951,"ĠAppeal":18952,"Ã§a":18953,"when":18954,"ĠErie":18955,"Ġdescriptions":18956,"Ġwisdom":18957,"Ã³d":18958,"Ġhug":18959,"onshire":18960,"Ġtwins":18961,"ĠToledo":18962,"Ġmodule":18963,"ĠISO":18964,"ĠKrak":18965,"Ġsuspicious":18966,"Ġ1790":18967,"ĠRex":18968,"Ġseam":18969,"forward":18970,"Ñķ":18971,"1981":18972,"Ġcarb":18973,"ĠDors":18974,"profile":18975,"ĠMohammed":18976,"FI":18977,"Ġvit":18978,"laration":18979,"ĠKara":18980,"ĠKolkata":18981,"Ġpneum":18982,"mentioned":18983,"Ġcontainer":18984,"Ġaccusations":18985,"ĠZagreb":18986,"ĠOliv":18987,"afia":18988,"gent":18989,"Ġconfluence":18990,"ĠWant":18991,"eka":18992,"aceutical":18993,"ĠSales":18994,"Ġdiary":18995,"rift":18996,"Ġreluctant":18997,"step":18998,"Ġphenomena":18999,"ijuana":19000,"dia":19001,"Ġmagistr":19002,"Ġaspir":19003,"ĠRC":19004,"Ġdefunct":19005,"Ġchemicals":19006,"Ġfog":19007,"udge":19008,"Ġlineage":19009,"Three":19010,"Ġenjoying":19011,"ĠSoci":19012,"Ġtraders":19013,"1982":19014,"Ġduet":19015,"Ġbure":19016,"Ġphones":19017,"dish":19018,"Ġspine":19019,"Ġsheriff":19020,"ĠReds":19021,"ĠAlbion":19022,"Ġalbeit":19023,"undy":19024,"ĠCosm":19025,"ĠSwim":19026,"ĠMats":19027,"Ġagenda":19028,"Ġ1829":19029,"Ġintimate":19030,"Ġpromotes":19031,"Ġpseudonym":19032,"Tor":19033,"ĠLance":19034,"Ġtrends":19035,"Ġcolumnist":19036,"opedia":19037,"oil":19038,"dor":19039,"awks":19040,"Ġspecializing":19041,"Ġsubmission":19042,"ierre":19043,"Ġchip":19044,"ĠSach":19045,"Ġdiagram":19046,"umper":19047,"ĠConsult":19048,"Ġburden":19049,"Ġprevalent":19050,"ĠClyde":19051,"Ġadjusted":19052,"ĠCecil":19053,"inster":19054,"ĠRB":19055,"Ġunderway":19056,"Ġdairy":19057,"ĠGlacier":19058,"rescent":19059,"ĠSanders":19060,"Ġfuselage":19061,"oft":19062,"ĠTropical":19063,"Ġprotested":19064,"ĠJub":19065,"Ġ108":19066,"Âłb":19067,"ĠJesuit":19068,"Ġjudged":19069,"ĠProcess":19070,"Ġcompanions":19071,"storey":19072,"played":19073,"Ġalpha":19074,"Ġrefusing":19075,"Ġcouch":19076,"Ġconfronted":19077,"ĠSister":19078,"ĠMell":19079,"Ġbaron":19080,"ĠBS":19081,"ĠAndr":19082,"ĠHear":19083,"Ġgraz":19084,"WF":19085,"orical":19086,"ĠShu":19087,"Ġdynamics":19088,"Ġexpressions":19089,"Ġmortality":19090,"Air":19091,"cane":19092,"1979":19093,"ropolis":19094,"ometer":19095,"Ġglasses":19096,"Ġfortified":19097,"Ġlesbian":19098,"ĠChambers":19099,"intro":19100,"Ġpunish":19101,"1975":19102,"ĠCompanies":19103,"Ġarise":19104,"ryn":19105,"Ġsharply":19106,"Ġcommissions":19107,"Ġcommod":19108,"eroy":19109,"ĠNeither":19110,"ĠBec":19111,"ĠRally":19112,"ĠCollegiate":19113,"ibald":19114,"dong":19115,"ĠOfficers":19116,"Ġhazard":19117,"ĠLeaf":19118,"RP":19119,"Ġfactions":19120,"lynn":19121,"ĠEz":19122,"Ġbreach":19123,"ĠHermann":19124,"ĠConstantine":19125,"oody":19126,"umbling":19127,"ĠJoyce":19128,"ĠIber":19129,"Ġstatewide":19130,"ĠSinger":19131,"Ġstatute":19132,"omers":19133,"agara":19134,"Ġhaun":19135,"Ġremarks":19136,"ĠVikings":19137,"Ġlandl":19138,"Ġemerge":19139,"orthy":19140,"ĠIL":19141,"ĠJung":19142,"ĠBram":19143,"elles":19144,"Ġballad":19145,"ĠLauren":19146,"Ġslender":19147,"ĠYah":19148,"isphere":19149,"Ġmascot":19150,"ĠRaven":19151,"ĠSEC":19152,"Ġprophe":19153,"Ġprayers":19154,"Mod":19155,"Ġexcellence":19156,"ĠSacred":19157,"ĠScouts":19158,"activated":19159,"illas":19160,"Ġcontinuation":19161,"ĠBarack":19162,"ĠMatthews":19163,"ĠIsh":19164,"ĠMolly":19165,"Ġsurgical":19166,"RE":19167,"Ġadvocates":19168,"ĠSixth":19169,"Ġinterfer":19170,"Ġdefenders":19171,"anic":19172,"ĠLuz":19173,"ĠGustav":19174,"Âłh":19175,"iani":19176,"Ġsubmerged":19177,"ĠNegro":19178,"Ġpulse":19179,"ynes":19180,"ĠReligious":19181,"note":19182,"ĠAdventures":19183,"ounge":19184,"ĠAndhra":19185,"rington":19186,"Ġsophomore":19187,"ĠYuk":19188,"mut":19189,"ĠChamp":19190,"ĠFields":19191,"Ġderivative":19192,"DT":19193,"ĠWer":19194,"osaurus":19195,"Ġlords":19196,"ĠCivic":19197,"Ġhallway":19198,"Ġinventor":19199,"Ġtheological":19200,"Ġburg":19201,"ĠAce":19202,"MO":19203,"Ġlifelong":19204,"NY":19205,"Ġmapping":19206,"ĠRoberto":19207,"ĠBhut":19208,"square":19209,"Ġpossessions":19210,"Ġdeny":19211,"oulder":19212,"Ġdestroyers":19213,"Ġstrengthened":19214,"Ġchambers":19215,"Ġimaging":19216,"economic":19217,"ĠFloyd":19218,"Ġnegotiate":19219,"ĠLadies":19220,"ĠDry":19221,"Ġpostal":19222,"rite":19223,"Âłmi":19224,"urable":19225,"ĠCNN":19226,"Ġlightly":19227,"Ġholidays":19228,"ĠLill":19229,"print":19230,"ospace":19231,"Ġsynthetic":19232,"ĠAssy":19233,"Ġsummers":19234,"Ġinsign":19235,"ĠDavidson":19236,"Chicago":19237,"years":19238,"Ġblocking":19239,"Ġtragedy":19240,"Ġpile":19241,"ĠFK":19242,"Ġplateau":19243,"Ġlisteners":19244,"ĠDA":19245,"Ġevolutionary":19246,"ĠMIT":19247,"Ġnobody":19248,"ĠHastings":19249,"Ġsummoned":19250,"ookie":19251,"à¤¾":19252,"ĠBeast":19253,"Ġscent":19254,"ĠConstitu":19255,"ĠSheikh":19256,"ĠGloucester":19257,"Luc":19258,"asaki":19259,"Ġposterior":19260,"bil":19261,"Rob":19262,"izza":19263,"usement":19264,"Ġrevision":19265,"Ġdocumentation":19266,"ĠRBI":19267,"Ġunin":19268,"900":19269,"ĠNem":19270,"ĠPhase":19271,"ĠJudaism":19272,"Ġhierarchy":19273,"Ġinflation":19274,"bahn":19275,"Ġlocate":19276,"ĠBonn":19277,"Ġecological":19278,"ĠStrategic":19279,"Ġinstallations":19280,"ĠKet":19281,"ĠBrooke":19282,"ĠMey":19283,"ĠPercy":19284,"ĠSlavic":19285,"afa":19286,"ĠFrancesco":19287,"ĠEmbassy":19288,"Ġmm":19289,"Ġarmour":19290,"ĠFalcon":19291,"background":19292,"ĠCBC":19293,"ĠMiz":19294,"ĠMau":19295,"ividually":19296,"Ġaddressing":19297,"Ġtrusted":19298,"ĠDemocracy":19299,"Ġpicks":19300,"ĠMotion":19301,"Ham":19302,"ĠFresh":19303,"Ġdestinations":19304,"Ġpaternal":19305,"ĠMilit":19306,"usp":19307,"Ġtrilogy":19308,"Ġsocio":19309,"Ġchaos":19310,"werp":19311,"Ġgovernmental":19312,"Ġnic":19313,"Ġapost":19314,"iban":19315,"Ġpainters":19316,"Ġsuspects":19317,"Ġadjoining":19318,"ĠCheroke":19319,"Ġskiing":19320,"Ġenterprises":19321,"ĠSty":19322,"Ġ1813":19323,"Ġerosion":19324,"Ġrejoined":19325,"Ġhollow":19326,"ĠRoads":19327,"Ġá¼":19328,"ĠLindsay":19329,"ĠTerror":19330,"prov":19331,"Ġslower":19332,"thor":19333,"Ġtallest":19334,"ĠNicarag":19335,"ĠNielsen":19336,"ĠCalcutta":19337,"Ã¼ck":19338,"bern":19339,"ĠViscount":19340,"ĠSlam":19341,"ĠWong":19342,"pound":19343,"Ġsummary":19344,"isbury":19345,"Ġorphan":19346,"ĠCash":19347,"ĠShak":19348,"ĠFry":19349,"ĠBattery":19350,"Ġblur":19351,"ĠHanover":19352,"ĠAdri":19353,"ĠElectronic":19354,"Ġassumption":19355,"Ġdecommissioned":19356,"Ġprofessors":19357,"ockets":19358,"Ġcollectively":19359,"antom":19360,"ĠAlps":19361,"Ġcounterparts":19362,"ĠPeriod":19363,"ĠMeeting":19364,"ĠGeoffrey":19365,"Ġretains":19366,"ĠSinclair":19367,"uen":19368,"ĠBenson":19369,"ĠThorn":19370,"ĠJorge":19371,"Ġrobust":19372,"Ġrituals":19373,"Ġlogical":19374,"Ġdissert":19375,"ĠParkway":19376,"Ġschooling":19377,"letter":19378,"ĠAgnes":19379,"ĠBiology":19380,"Ġgeography":19381,"ĠAuburn":19382,"Ġtransactions":19383,"storm":19384,"Ġpolynom":19385,"ĠSuccess":19386,"cylinder":19387,"ĠHour":19388,"Ġdepths":19389,"ĠLandmark":19390,"ulla":19391,"Ġinfilt":19392,"auts":19393,"iasm":19394,"ĠLect":19395,"Ġdebts":19396,"ĠArabs":19397,"Ġpsychiat":19398,"Ġapproxim":19399,"Ġtroubles":19400,"Ġinserted":19401,"Ġfeminine":19402,"zone":19403,"Ġsuspicion":19404,"angan":19405,"hun":19406,"Ġtense":19407,"rika":19408,"Ġprose":19409,"ahi":19410,"Any":19411,"ĠRum":19412,"ĠKul":19413,"ĠGle":19414,"Ġslowed":19415,"Ġsyndicated":19416,"Ġfraction":19417,"ĠFrem":19418,"usive":19419,"ĠRash":19420,"ĠMarri":19421,"Ġcrowds":19422,"Ġharmony":19423,"Ġbelly":19424,"ĠHartford":19425,"ĠKhal":19426,"à¯":19427,"Ġlightning":19428,"Ġanterior":19429,"Ġphysi":19430,"elius":19431,"Ġsenses":19432,"Ġsavings":19433,"eel":19434,"Ġnatives":19435,"izards":19436,"Ġoccupying":19437,"ĠGujarat":19438,"ĠChristine":19439,"Ġexempl":19440,"qi":19441,"Ġsandy":19442,"Ġassuming":19443,"130":19444,"Ġdiploma":19445,"ĠCunning":19446,"ĠCav":19447,"Ġinstinct":19448,"1978":19449,"aland":19450,"Ġgospel":19451,"MG":19452,"Ġfreel":19453,"Ġinterval":19454,"clipse":19455,"Ġcatalogue":19456,"Ġtreating":19457,"Ġretro":19458,"Ġslaughter":19459,"ĠWyn":19460,"ĠCredit":19461,"ocus":19462,"ĠCaled":19463,"Ġhandsome":19464,"ĠSavage":19465,"App":19466,"ellular":19467,"ĠZar":19468,"Ġannouncing":19469,"park":19470,"Ġ1826":19471,"ĠConservatives":19472,"psy":19473,"Ġviral":19474,"ĠUzbek":19475,"Ġconcludes":19476,"ĠPolyt":19477,"ĠClayton":19478,"ĠPatrol":19479,"hon":19480,"ĠMidlands":19481,"ĠInner":19482,"Ġtriangular":19483,"Ġcorrupt":19484,"Ġpec":19485,"Ġposting":19486,"Ġlunar":19487,"Ġrav":19488,"Tw":19489,"Ġoperas":19490,"ĠOmaha":19491,"ĠLÃ©":19492,"ĠDawson":19493,"pired":19494,"ologic":19495,"ĠDup":19496,"cio":19497,"TF":19498,"Ġfores":19499,"Ġcrushed":19500,"echnic":19501,"Ġcoordinate":19502,"Ġ1818":19503,"Ġrelates":19504,"bidae":19505,"ĠFerrari":19506,"ĠTehran":19507,"especially":19508,"ĠDas":19509,"Ġstorms":19510,"ĠAutonom":19511,"scill":19512,"ĠGDP":19513,"ĠDudley":19514,"ĠGaul":19515,"keeping":19516,"Ġaveraging":19517,"ĠVald":19518,"ĠShirley":19519,"eon":19520,"Ġimpress":19521,"mediately":19522,"ĠLetters":19523,"Ġspecialty":19524,"Arab":19525,"ãĢ":19526,"ĠFuj":19527,"Ġbother":19528,"ĠSene":19529,"Ġlacks":19530,"ancel":19531,"Ġdisg":19532,"Ġplaster":19533,"Ġtumor":19534,"Ġlumber":19535,"Ã²":19536,"ĠPablo":19537,"ĠBasel":19538,"Ġspanning":19539,"Ġprecious":19540,"Ġmice":19541,"Ġ>":19542,"Ġnonprofit":19543,"Cam":19544,"ĠTracks":19545,"check":19546,"ĠSuperman":19547,"Oper":19548,"Ġoriented":19549,"Ġactivation":19550,"flies":19551,"ĠAway":19552,"ĠMons":19553,"Ġneo":19554,"Ġfinanced":19555,"arya":19556,"Ġmoths":19557,"Ġscenario":19558,"ĠIst":19559,"Atlant":19560,"comb":19561,"Ġmatric":19562,"Land":19563,"Ol":19564,"Ġcure":19565,"Ġtriggered":19566,"ĠRecreation":19567,"heres":19568,"ĠShannon":19569,"uming":19570,"ĠNewark":19571,"Ġremod":19572,"Ġelectorate":19573,"prot":19574,"ĠShawn":19575,"ĠÅ½":19576,"Ġarche":19577,"Ġcellular":19578,"Ġdelays":19579,"Ġcooperative":19580,"Ġcycles":19581,"Ġdominance":19582,"Ġyelled":19583,"ÃŁe":19584,"ĠFon":19585,"ĠSharp":19586,"ebe":19587,"Ġcinemat":19588,"Ġbarracks":19589,"ĠDundee":19590,"ĠThur":19591,"AI":19592,"ĠPoz":19593,"ĠAngola":19594,"Ġnowhere":19595,"initely":19596,"Ġbays":19597,"ĠShire":19598,"Ġdeclare":19599,"ĠSiege":19600,"Ġadmits":19601,"Ġrides":19602,"Ġintensive":19603,"Ġunnamed":19604,"ĠEyes":19605,"ĠMiddlesex":19606,"ĠCram":19607,"ĠClem":19608,"ĠJacobs":19609,"Ġbias":19610,"Ġinduced":19611,"Ġpeers":19612,"ĠPride":19613,"Ġsketches":19614,"Ġdisplacement":19615,"Ġintrig":19616,"Ġdioxide":19617,"Ġpleaded":19618,"Ġ109":19619,"recht":19620,"ecting":19621,"ĠClimate":19622,"Ġintroduces":19623,"Ġdetained":19624,"Ġsweep":19625,"Ġrestruct":19626,"Ġstraw":19627,"ĠDunn":19628,"ĠSophia":19629,"ĠLima":19630,"Ġweird":19631,"Ġordin":19632,"since":19633,"Ġtechnically":19634,"ĠDana":19635,"ĠHarri":19636,"Ġtatto":19637,"Ġexports":19638,"Ġpolls":19639,"ĠSwift":19640,"ĠCott":19641,"ĠCoventry":19642,"Ġdirty":19643,"opt":19644,"ĠValencia":19645,"Ġresidences":19646,"Ġmakers":19647,"Ġirre":19648,"ĠBryant":19649,"Ġarcade":19650,"hai":19651,"ĠManning":19652,"Ġsupernatural":19653,"Ġspans":19654,"Ġupstream":19655,"ĠTomatoes":19656,"ĠKnown":19657,"ĠTimothy":19658,"Fort":19659,"Ġembrace":19660,"Ġmetric":19661,"ĠAlc":19662,"Ġcelebrating":19663,"Ġmarker":19664,"Ġcher":19665,"Ġattitudes":19666,"Ġsuperhero":19667,"Mont":19668,"ĠFow":19669,"ril":19670,"ĠTheological":19671,"](":19672,"atile":19673,"versely":19674,"Ġscrapped":19675,"ĠNest":19676,"Ġtestified":19677,"ĠCret":19678,"oprano":19679,"casts":19680,"Ġtransferring":19681,"ĠAnimal":19682,"Ġblacks":19683,"Ġessence":19684,"upp":19685,"ductions":19686,"VN":19687,"ĠVijay":19688,"cence":19689,"Ġgenome":19690,"ĠSporting":19691,"ĠFram":19692,"Ġminerals":19693,"Ġairports":19694,"ilers":19695,"afi":19696,"Ġkin":19697,"Take":19698,"ĠHaj":19699,"Ġhunter":19700,"ĠMits":19701,"Ġprominently":19702,"FO":19703,"Ġmaxim":19704,"kel":19705,"Ġcros":19706,"Doctor":19707,"1974":19708,"what":19709,"minton":19710,"Ġpools":19711,"Ġplum":19712,"ĠChristie":19713,"ensions":19714,"Ġalgorithms":19715,"SI":19716,"ĠAntarctica":19717,"Ġtranscription":19718,"Ġconvenient":19719,"ĠBulldogs":19720,"aso":19721,"Ġpiv":19722,"Ġnitrogen":19723,"Ġmetaph":19724,"ĠPratt":19725,"iov":19726,"ĠStop":19727,"ĠGos":19728,"ĠSleep":19729,"ĠLope":19730,"Ġdemise":19731,"horse":19732,"cole":19733,"ellites":19734,"Ġmentally":19735,"mart":19736,"Ġreinst":19737,"ĠElena":19738,"ĠBrigadier":19739,"ĠWr":19740,"Ã¡l":19741,"imeters":19742,"Ġ115":19743,"ĠRecent":19744,"Ġangles":19745,"Ġmolecule":19746,"layer":19747,"ĠLands":19748,"Ġdefeats":19749,"London":19750,"plate":19751,"Ġcanvas":19752,"Ġadvertisements":19753,"Ġiconic":19754,"orse":19755,"ĠTate":19756,"Ġexpressing":19757,"Ġshifting":19758,"1977":19759,"Ġfortifications":19760,"Ã¢m":19761,"ĠMI":19762,"Ġemergence":19763,"Ġexceeded":19764,"Ġhalted":19765,"Ur":19766,"Ġproductive":19767,"Ġpodium":19768,"ĠPsychology":19769,"Ġmarkings":19770,"ĠZur":19771,"reach":19772,"acia":19773,"Ġimagined":19774,"Ġstrips":19775,"Ġspeeches":19776,"ĠBooth":19777,"Ġhomeland":19778,"uters":19779,"Ġpainful":19780,"Ġgenerals":19781,"Ġslogan":19782,"ogram":19783,"ĠInvestment":19784,"Ġembry":19785,"Ġantenna":19786,"Ġmaneuver":19787,"igon":19788,"Ġmarathon":19789,"ovic":19790,"Ġgonna":19791,"ĠTwin":19792,"Ġ1816":19793,"ĠPied":19794,"ĠWhilst":19795,"Ġrepet":19796,"eele":19797,"ĠÃĵ":19798,"ulator":19799,"ocaly":19800,"Ġgym":19801,"Ġpartnerships":19802,"echnology":19803,"ĠHoldings":19804,"Der":19805,"Ġdeposit":19806,".\",":19807,"LL":19808,"ĠVand":19809,"Ġourselves":19810,"ayat":19811,"common":19812,"Ġbasal":19813,"ĠDag":19814,"Ġroller":19815,"often":19816,"icker":19817,"iciary":19818,"Ġidol":19819,"Ġpremiership":19820,"ĠGaza":19821,"Ġmerge":19822,"ĠSaturn":19823,"ustain":19824,"ĠUniversities":19825,"Ġstare":19826,"Ġ\"'":19827,"ĠCarmen":19828,"Ġcameo":19829,"Ġsecrets":19830,"Vict":19831,"ĠBolog":19832,"ĠClan":19833,"Ġcurious":19834,"sein":19835,"ĠRicky":19836,"ÄĽ":19837,"Ben":19838,"ĠDuk":19839,"tel":19840,"alone":19841,"Ġcorresponds":19842,"Ġpoured":19843,"1976":19844,"ĠTina":19845,"ĠSched":19846,"ilibrium":19847,"sar":19848,"ĠGrass":19849,"Ġdevot":19850,"seven":19851,"oton":19852,"ĠMinisters":19853,"Ġpossibilities":19854,"Ġinferior":19855,"Ġfreeway":19856,"Ġlightweight":19857,"ĠSK":19858,"Sa":19859,"ĠFear":19860,"ĠCalder":19861,"ĠHers":19862,"vian":19863,"ĠRules":19864,"ĠAntwerp":19865,"Ġpenetr":19866,"iseries":19867,"chard":19868,"ailable":19869,"Ġeject":19870,"ertiary":19871,"ĠMaurit":19872,"Ġcomposite":19873,"mour":19874,"axon":19875,"Ġnotorious":19876,"Ġarrow":19877,"Ġinsult":19878,"Ġmold":19879,"Ġimpacts":19880,"ĠPius":19881,"rolling":19882,"ĠNin":19883,"Ġdisappointment":19884,"ĠWillis":19885,"ĠTunisia":19886,"Ġreinforcements":19887,"imet":19888,"Ġcontinuity":19889,"Ġautomated":19890,"Ġcompliance":19891,"ĠInternal":19892,"Ġlegends":19893,"Ġpersecution":19894,"TT":19895,"Ġplug":19896,"Ġdin":19897,"ĠMcLe":19898,"Ġatmospheric":19899,"Ġcoloured":19900,"clock":19901,"Ġphysicians":19902,"ĠVeterans":19903,"inny":19904,"ĠMonastery":19905,"rak":19906,"Ġsau":19907,"ĠTara":19908,"Ġmotorway":19909,"ĠIcelandic":19910,"Ġidentifies":19911,"Ġrested":19912,"Ġbast":19913,"ĠPeterson":19914,"Ġniece":19915,"Ġswimmer":19916,"ĠPatterson":19917,"Ġexperiencing":19918,"Ġpard":19919,"750":19920,"ĠLÃ³":19921,"shi":19922,"Ġexiled":19923,"ĠNGO":19924,"ĠJet":19925,"1972":19926,"Ġcouncillors":19927,"Night":19928,"ĠIde":19929,"ĠPerforming":19930,"Ġå":19931,"ĠGov":19932,"ĠKuwait":19933,"Carl":19934,"ĠBaghdad":19935,"Ġwiped":19936,"1973":19937,"Ġoutlet":19938,"Ġundis":19939,"rongh":19940,"ĠIrving":19941,"even":19942,"tailed":19943,"Ġcomparing":19944,"ĠSpl":19945,"Ġeponymous":19946,"Ġgifted":19947,"Ġaccidents":19948,"Ġbroadly":19949,"Ġ1806":19950,"Ġanalyst":19951,"Ġviewer":19952,"isible":19953,"MR":19954,"Ġ1801":19955,"Ġtheatres":19956,"ĠLambert":19957,"Ġspont":19958,"ĠWare":19959,"Ġfountain":19960,"Ġcollar":19961,"Ġaquatic":19962,"ĠBMW":19963,"Ġmathematician":19964,"\"(\"":19965,"120":19966,"Ġstealing":19967,"Ġslept":19968,"andan":19969,"Ġsimilarity":19970,"arine":19971,"ieces":19972,"wave":19973,"ĠIbrahim":19974,"Ġbattlefield":19975,"Thanks":19976,"Ġcounting":19977,"Ġdiscour":19978,"plex":19979,"Ġshadows":19980,"Ġrebuild":19981,"Ġundefeated":19982,"ĠBott":19983,"ĠNordic":19984,"ĠTonight":19985,"ĠPret":19986,"Ġ450":19987,"Ġsensation":19988,"atinum":19989,"icious":19990,"Ġsolved":19991,"Ġlocks":19992,"emon":19993,"Ġposter":19994,"Mary":19995,"ĠCounsel":19996,"Ġignore":19997,"Ġcatching":19998,"ĠTD":19999,"Ġoffspring":20000,"PL":20001,"Ġsurveyed":20002,"Ġmeantime":20003,"Ġlaughter":20004,"ĠBasque":20005,"ĠDeutsche":20006,"color":20007,"Ġwrestlers":20008,"Ġcaution":20009,"Ġpamph":20010,"Ġasylum":20011,"uffs":20012,"Åº":20013,"idy":20014,"ĠCove":20015,"Ġaccounted":20016,"ĠArlington":20017,"ĠSchne":20018,"CE":20019,"ĠFrancisc":20020,"Ġsodium":20021,"Ġconceptual":20022,"Ġfairy":20023,"Louis":20024,"north":20025,"ĠHammond":20026,"Ġrecognizes":20027,"Ġreunion":20028,"driven":20029,"ĠVenezuelan":20030,"ĠWarn":20031,"ĠNeo":20032,"Ġcomply":20033,"Ġ1827":20034,"ĠFast":20035,"ĠPearson":20036,"oser":20037,"pack":20038,"Ġexplores":20039,"licted":20040,"Ġlifting":20041,"Ġruin":20042,"Ġhex":20043,"Ġflames":20044,"ĠDeclaration":20045,"Ġdismant":20046,"iaries":20047,"ĠPole":20048,"forth":20049,"Ġinstituted":20050,"Ġposed":20051,"retion":20052,"Ġpac":20053,"ĠEls":20054,"itÃ©":20055,"ĠMec":20056,"Ġarmored":20057,"Ġeagle":20058,"Ġfaded":20059,"ĠDoyle":20060,"ongo":20061,"ĠPhilippe":20062,"ulia":20063,"ĠParadise":20064,"ĠTac":20065,"ĠReturning":20066,"owing":20067,"Ġhips":20068,"Ġquestioning":20069,"ĠPend":20070,"Ġcarpet":20071,"ĠBug":20072,"ĠCarpenter":20073,"Japanese":20074,"rique":20075,"Ġevacuation":20076,"hydr":20077,"gone":20078,"awk":20079,"ĠZoo":20080,"ĠDenis":20081,"ĠHearts":20082,"represent":20083,"ĠAston":20084,"Ġassisting":20085,"ĠArabian":20086,"ĠDuchess":20087,"ĠWanderers":20088,"ĠLetter":20089,"oise":20090,"ĠDeal":20091,"Ġantis":20092,"Ġdischarged":20093,"ĠTuc":20094,"Ġindef":20095,"ĠMongolia":20096,"Ġtheft":20097,"Ġfu":20098,"lace":20099,"Ġreconstructed":20100,"ĠBermuda":20101,"manship":20102,"imedia":20103,"inks":20104,"Ġconserv":20105,"Ġ1793":20106,"Ġreactor":20107,"ĠCherokee":20108,"autical":20109,"ĠElectoral":20110,"Ġbasically":20111,"ĠCarlisle":20112,"achute":20113,"Ġpermits":20114,"Ġreorganized":20115,"Ġcalcium":20116,"Ġasym":20117,"Ġpatents":20118,"Ġdamp":20119,"Ġlas":20120,"ĠAleks":20121,"Ġinfinite":20122,"Ġinability":20123,"ĠAtl":20124,"ĠNeigh":20125,"ĠAbdullah":20126,"Ġpositively":20127,"ĠRecently":20128,"ĠGreatest":20129,"Ġfixture":20130,"abetes":20131,"Jean":20132,"ĠHak":20133,"icultural":20134,"Ġspider":20135,"ĠValentine":20136,"ĠÄ°":20137,"Ġjuvenile":20138,"Ġrecovering":20139,"eption":20140,"rically":20141,"Ġcontractor":20142,"ĠTorres":20143,"Ġsuits":20144,"Elect":20145,"ĠZero":20146,"Rec":20147,"isen":20148,"Ġobservers":20149,"Mah":20150,"iola":20151,"Ġsubdivided":20152,"Ġtargeting":20153,"ĠCanon":20154,"ĠBle":20155,"ĠKub":20156,"Ġbeast":20157,"Ġreporters":20158,"shirt":20159,"Ġholders":20160,"ĠSale":20161,"Ġstays":20162,"ĠYak":20163,"ĠNad":20164,"writers":20165,"Ġstab":20166,"Ġbalanced":20167,"Ġdecay":20168,"ecessary":20169,"html":20170,"Ġsuperintendent":20171,"upon":20172,"ĠCertain":20173,"\\.":20174,"Ġexcavations":20175,"ĠAAA":20176,"Ġconfrontation":20177,"Ġdebates":20178,"operative":20179,"prom":20180,"ĠHoney":20181,"Ġspecification":20182,"Ġteenagers":20183,"Fre":20184,"riction":20185,"chy":20186,"Ġrefugee":20187,"ĠWan":20188,"ĠReservoir":20189,"scape":20190,"Ġmodeled":20191,"ĠHok":20192,"absburg":20193,"ĠSalisbury":20194,"uala":20195,"Ġcultiv":20196,"Ġintimid":20197,"Ġaligned":20198,"Kh":20199,"ĠHeather":20200,"ĠTitans":20201,"ĠBraves":20202,"ĠMk":20203,"ĠPill":20204,"Ġindividually":20205,"oti":20206,"Ġminorities":20207,"ĠRw":20208,"Ġfeeds":20209,"Ġsubdivision":20210,"Ġuncomfortable":20211,"yu":20212,"atching":20213,"Ġtissues":20214,"Ġpeasants":20215,"eking":20216,"button":20217,"ĠMÄģori":20218,"Ġfucking":20219,"ĠSudden":20220,"Ġdull":20221,"Ġquarry":20222,"HD":20223,"ĠPatricia":20224,"iuseppe":20225,"ĠApplied":20226,"ĠCran":20227,"Ġecc":20228,"Play":20229,"Ġacet":20230,"ĠCommodore":20231,"ĠMacedonian":20232,"ĠHale":20233,"Ġundergoing":20234,"ĠChu":20235,"athlon":20236,"Ġcontamin":20237,"Ġlean":20238,"plan":20239,"ĠRising":20240,"Ġsouls":20241,"Ġaluminum":20242,"Ġrim":20243,"ĠKC":20244,"Ġstaircase":20245,"ĠAless":20246,"Ġrector":20247,"eyed":20248,"Ġdefendant":20249,"Ġdetached":20250,"oust":20251,"backer":20252,"Ġrage":20253,"Ġimplied":20254,"Ġlicensing":20255,"gon":20256,"ĠBarton":20257,"Ġaging":20258,"ĠAirways":20259,"Ã¡lez":20260,"ĠFashion":20261,"Ġphotographic":20262,"Ġcyclist":20263,"Ġvowel":20264,"Ġrental":20265,"Ġ1803":20266,"utory":20267,"ĠDat":20268,"cam":20269,"ĠSaid":20270,"ĠLuk":20271,"agree":20272,"Ġtide":20273,"ĠParaguay":20274,"Ġpremium":20275,"lift":20276,"Ġbarriers":20277,"anu":20278,"Ġrefusal":20279,"Äĵ":20280,"Ġprivat":20281,"Ġlaund":20282,"Ġdeadly":20283,"Ġexcavated":20284,"BB":20285,"Ġspinning":20286,"ĠBit":20287,"Ġankle":20288,"Ġholdings":20289,"ĠBrain":20290,"eval":20291,"ĠCategory":20292,"Ġvictorious":20293,"Ġflame":20294,"MF":20295,"Ġhurd":20296,"ĠCunningham":20297,"Ġellip":20298,"ĠSunn":20299,"Ġdaytime":20300,"Ġmountainous":20301,"Ġbefriend":20302,"Ġgrouped":20303,"ĠTurin":20304,"ĠCorner":20305,"Ġworthy":20306,"ĠJerome":20307,"Ġ1819":20308,"Ġdispatched":20309,"Es":20310,"ĠRoma":20311,"Ġfox":20312,"ĠEmirates":20313,"Ġprefix":20314,"Ġ×":20315,"Ġmodification":20316,"ĠLeÃ³n":20317,"Ġjeans":20318,"Ġupright":20319,"Ge":20320,"Ġbacks":20321,"Ġ170":20322,"ĠSaxon":20323,"ĠBundesliga":20324,"Ġstandings":20325,"olshev":20326,"Ġfrustration":20327,"opa":20328,"Ġinscribed":20329,"Ġentrepreneurs":20330,"ĠIsabella":20331,"ecker":20332,"anza":20333,"ĠParalympics":20334,"ĠTort":20335,"inski":20336,"mith":20337,"Ġaccurately":20338,"Ġviolated":20339,"Ġinjection":20340,"ĠFCC":20341,"Ġtheolog":20342,"Ġolive":20343,"ĠÎ±":20344,"ĠSew":20345,"Ġstole":20346,"Ġsexuality":20347,"ĠOv":20348,"Ġfeathers":20349,"ĠHumphrey":20350,"ĠParade":20351,"Ġhiking":20352,"arios":20353,"wear":20354,"Ġprecision":20355,"Ġanthem":20356,"ĠBulls":20357,"ĠCheshire":20358,"ĠSeventh":20359,"Ġframed":20360,"Ġoriginating":20361,"ominated":20362,"ĠDetective":20363,"ĠColleges":20364,"Ġplaint":20365,"Ġlev":20366,"Ġexploded":20367,"Ġenthusiasm":20368,"ĠBarrett":20369,"ĠMugh":20370,"aple":20371,"Ġbalcon":20372,"pert":20373,"ĠBoss":20374,"ĠAdventure":20375,"arna":20376,"abar":20377,"Ġ111":20378,"Ġdrought":20379,"ĠPool":20380,"amination":20381,"hm":20382,"Ġabundance":20383,"ĠDix":20384,"ĠNay":20385,"Far":20386,"acio":20387,"Ġgalaxy":20388,"illi":20389,"Ġcoordinated":20390,"viewed":20391,"Ġskate":20392,"strument":20393,"Ġscripts":20394,"rud":20395,"wana":20396,"Ġseventy":20397,"ĠSoviets":20398,"ĠShell":20399,"ĠGarrett":20400,"Ġunanimously":20401,"Ġlocalities":20402,"ĠTut":20403,"ĠCarlton":20404,"Ġoutlaw":20405,"ĠHS":20406,"Ġperennial":20407,"artz":20408,"ĠDresden":20409,"ĠThank":20410,"Ã¨ne":20411,"ĠRouge":20412,"ĠEarn":20413,"ĠCubs":20414,"Ġglory":20415,"Ġwears":20416,"ĠReformed":20417,"fax":20418,"hom":20419,"Ġmol":20420,"Ġdive":20421,"ĠRuby":20422,"ĠHBO":20423,"Ġintervals":20424,"inating":20425,"Ġpulls":20426,"size":20427,"Ġsimulation":20428,"Ġdeposited":20429,"ĠWen":20430,"à´":20431,"Ġredist":20432,"ĠIps":20433,"ĠJupiter":20434,"ĠTeachers":20435,"sun":20436,"ugging":20437,"reditation":20438,"ighty":20439,"Ġshifts":20440,"Ġabruptly":20441,"irus":20442,"Ġserm":20443,"Ġrefr":20444,"ĠBangkok":20445,"Ã¨res":20446,"ĠVenus":20447,"Ġstatic":20448,"kill":20449,"Ġforested":20450,"Ġcircuits":20451,"ĠHowe":20452,"ĠKob":20453,"ĠBahrain":20454,"ĠRit":20455,"Ġprocessed":20456,"ĠBlackburn":20457,"ĠLÃ³pez":20458,"Del":20459,"orers":20460,"ĠRust":20461,"Ġherald":20462,"Inter":20463,"Ġskept":20464,"gerald":20465,"ĠCable":20466,"ĠAdults":20467,"unker":20468,"ĠInclud":20469,"phoon":20470,"Ġseiz":20471,"Ġupdates":20472,"ĠChoir":20473,"Ġoutright":20474,"ĠMaple":20475,"iliated":20476,"Âł\"":20477,"Ġpraising":20478,"ĠOccup":20479,"ĠSL":20480,"Ġinfring":20481,"ĠParsons":20482,"ayette":20483,"ĠGonzÃ¡lez":20484,"Ġclip":20485,"Ġordering":20486,"Ġuncertainty":20487,"Ġhydraul":20488,"Ġarches":20489,"thirds":20490,"ĠMW":20491,"ĠCedar":20492,"fu":20493,"oye":20494,"ĠCliff":20495,"ĠOkin":20496,"Ġcomprise":20497,"ĠCities":20498,"ĠDuck":20499,"Ġspatial":20500,"International":20501,"Ġsatisfy":20502,"Ġpear":20503,"ĠArcher":20504,"ĠSearch":20505,"Ġcapped":20506,"steps":20507,"Home":20508,"dou":20509,"Ġpresided":20510,"ĠRough":20511,"________":20512,"Ġwhisper":20513,"Call":20514,"ĠHydro":20515,"Ġunusually":20516,"Ġescorted":20517,"ĠActs":20518,"Ġindication":20519,"Ġoverhaul":20520,"Ġplantations":20521,"olla":20522,"ĠProperty":20523,"ĠFIBA":20524,"Ġeconomist":20525,"ĠSyl":20526,"ĠTheres":20527,"ĠAugustine":20528,"Ġcurse":20529,"heimer":20530,"Ġreminiscent":20531,"ificent":20532,"Ġdeaf":20533,"Ġunrelated":20534,"ĠGould":20535,"Ġ1822":20536,"Ġweighed":20537,"Ġcontroller":20538,"Ġdefenses":20539,"Ġhungry":20540,"Ġeighteenth":20541,"Ġdissertation":20542,"istries":20543,"Ġsensor":20544,"ĠRandolph":20545,"Ä±n":20546,"People":20547,"Ġ128":20548,"ĠMickey":20549,"ĠPred":20550,"ĠImmediately":20551,"ĠBronx":20552,"Ġrebuilding":20553,"hesis":20554,"uttgart":20555,"Ġzoo":20556,"1971":20557,"Ġcartoons":20558,"Ġfist":20559,"ĠCannes":20560,"Ġdeficit":20561,"ĠTraditional":20562,"ĠTil":20563,"Ġ/>":20564,"avelength":20565,"Ġconstraints":20566,"Ġchord":20567,"Ġblew":20568,"Ġpipeline":20569,"ĠInvestig":20570,"authored":20571,"ĠJing":20572,"jee":20573,"Ġbadge":20574,"ĠRudolf":20575,"Ġtownships":20576,"ĠMih":20577,"pos":20578,"ĠShepherd":20579,"ĠFol":20580,"Ġinnoc":20581,"unders":20582,"osphere":20583,"Ġpassages":20584,"Ġappreciate":20585,"Ġsupermark":20586,"Ġbackwards":20587,"ĠOrganisation":20588,"ĠGalway":20589,"Ġbells":20590,"Ġappeals":20591,"ĠNou":20592,"akis":20593,"ĠNonetheless":20594,"Ġdisposal":20595,"Have":20596,"Ġoscill":20597,"ĠRiverside":20598,"lat":20599,"ondition":20600,"ĠWould":20601,"Ġnurses":20602,"Ġhunger":20603,"MB":20604,"ĠMidwest":20605,"Ġtin":20606,"ĠSev":20607,"ĠBucharest":20608,"Ġ5000":20609,"Ġwit":20610,"ĠAntio":20611,"Ġnationalism":20612,"Ġprecursor":20613,"Ġrecruiting":20614,"ĠUltimately":20615,"CH":20616,"prop":20617,"ĠBangalore":20618,"fil":20619,"ĠDru":20620,"Ġmeals":20621,"Ġmidst":20622,"iae":20623,"Ġrelate":20624,"asting":20625,"Ġbesie":20626,"alom":20627,"Ġfals":20628,"Ġtempt":20629,"Ġ112":20630,"Ġshooter":20631,"vine":20632,"ĠMO":20633,"Ġpleasant":20634,"ĠFrost":20635,"Ġ220":20636,"ĠJagu":20637,"Ġtroubled":20638,"Ġgranddaughter":20639,"ĠGÃ³":20640,"Ġrotating":20641,"Ġpossesses":20642,"alach":20643,"uren":20644,"ĠQuint":20645,"Ġorganizational":20646,"ĠStandards":20647,"points":20648,"ĠMao":20649,"ĠUd":20650,"ĠBarker":20651,"ĠByron":20652,"Ġfarther":20653,"omans":20654,"ĠIsles":20655,"heid":20656,"Ġrumors":20657,"Ġ1823":20658,"parents":20659,"Ġprojection":20660,"GE":20661,"ĠGrim":20662,"Long":20663,"Ġmerchand":20664,"VI":20665,"Ġ1809":20666,"ĠPanch":20667,"ĠBarber":20668,"ĠAugusta":20669,"abis":20670,"ndon":20671,"Ġchips":20672,"ĠLorenzo":20673,"ÃŃo":20674,"Ġpedestrian":20675,"ĠBeverly":20676,"ĠICC":20677,"Ġapex":20678,"Ġrhet":20679,"uvian":20680,"Ġcaptained":20681,"pora":20682,"Ġfacial":20683,"pus":20684,"Ġgorge":20685,"ĠFlanders":20686,"ĠLopez":20687,"Ġsocially":20688,"NU":20689,"Ty":20690,"Ġobserver":20691,"Ġlymph":20692,"Ġfolklore":20693,"ibal":20694,"Ġprocessor":20695,"Ġplac":20696,"Ġpending":20697,"Ġcompression":20698,"Ġfirearms":20699,"Ġaccumulated":20700,"Ġpredators":20701,"Ġshade":20702,"Ġhandic":20703,"Ġscreamed":20704,"Ġsubstances":20705,"Ġmonsters":20706,"Ġrall":20707,"Ġtrauma":20708,"Ġnec":20709,"ĠGn":20710,"ĠAnniversary":20711,"Ġadmired":20712,"Vol":20713,"ĠGat":20714,"Ġveins":20715,"Ġappreciated":20716,"ĠFant":20717,"support":20718,"ĠLooking":20719,"ĠAustralians":20720,"Ġtenants":20721,"ĠYosh":20722,"chez":20723,"ĠAside":20724,"ĠBrem":20725,"Ġspiral":20726,"ĠKannada":20727,"arette":20728,"Ġrecount":20729,"ĠPorto":20730,"bas":20731,"Ġaven":20732,"Sim":20733,"Ġspeculated":20734,"Ġmetro":20735,"Ġofferings":20736,"ĠMets":20737,"ĠDonna":20738,"\".\"":20739,"Ġstrongh":20740,"ĠPBS":20741,"ĠDowns":20742,"Ġexploitation":20743,"Ġtransfers":20744,"Ġairs":20745,"ĠLund":20746,"esy":20747,"afts":20748,"Ġpuppet":20749,"Ġplots":20750,"Ġcouncillor":20751,"ĠSelect":20752,"Ġtoys":20753,"ĠAbbas":20754,"Ġfloods":20755,"clusions":20756,"ĠPrairie":20757,"Ġnumbering":20758,"aircraft":20759,"ĠHabsburg":20760,"irming":20761,"Back":20762,"erd":20763,"ĠAlberto":20764,"Ġhearts":20765,"Ġcake":20766,"Ġappreciation":20767,"ĠBrett":20768,"Ùħ":20769,"Ġbind":20770,"eaux":20771,"Ġsupreme":20772,"ono":20773,"Ġtiles":20774,"ĠRita":20775,"ĠCI":20776,"hig":20777,"ĠCale":20778,"ĠDoming":20779,"Ġserge":20780,"ĠDover":20781,"ĠMist":20782,"ĠAllMusic":20783,"Ġyours":20784,"Ġdental":20785,"Ġdamaging":20786,"ĠCrisis":20787,"ĠRebell":20788,"Ġnecessity":20789,"Ġfrustrated":20790,"ĠIR":20791,"fem":20792,"erting":20793,"1969":20794,"ĠPue":20795,"ĠGenerally":20796,"Ġpunct":20797,"uating":20798,"ĠBian":20799,"jar":20800,"Ġgeological":20801,"ĠAdmiralty":20802,"ĠRoch":20803,"Ġprogression":20804,"Ġwidened":20805,"Young":20806,"Ġ1817":20807,"Ġpersuade":20808,"Ġpsy":20809,"1968":20810,"Bul":20811,"Ġgrat":20812,"largest":20813,"ĠFight":20814,"ĠMund":20815,"Ġdisappearance":20816,"ĠWeber":20817,"recorded":20818,"angled":20819,"ĠPag":20820,"ĠWB":20821,"Ġgrandchildren":20822,"Ġcardinal":20823,"Ġoverd":20824,"intage":20825,"Ġcared":20826,"otive":20827,"Ġalley":20828,"ĠArchitects":20829,"Ġshy":20830,"ventions":20831,"ĠReligion":20832,"Ġbirthplace":20833,"Ġpassive":20834,"ĠCasc":20835,"antan":20836,"lake":20837,"Ġcampaigned":20838,"ĠAshton":20839,"Ġfring":20840,"cue":20841,"Ġtributaries":20842,"birds":20843,"ĠSÃ©":20844,"ĠGenesis":20845,"Ġethical":20846,"Spanish":20847,"Ġstressed":20848,"itism":20849,"Ġinflamm":20850,"ĠFres":20851,"Cat":20852,"ipedia":20853,"ĠTechnologies":20854,"Ġflags":20855,"Ġprivileges":20856,"ĠLibert":20857,"pi":20858,"Ġimplications":20859,"Ġbuzz":20860,"ertile":20861,"ĠInver":20862,"Ġdetachment":20863,"working":20864,"gil":20865,"Ġlodge":20866,"oki":20867,"bore":20868,"leaf":20869,"dated":20870,"appers":20871,"Ġsurpassed":20872,"erne":20873,"Ġsuppress":20874,"Ġink":20875,"ĠSynd":20876,"Ġmortar":20877,"ĠEthiopian":20878,"Ġexported":20879,"ĠClarence":20880,"abh":20881,"Ġbureauc":20882,"Ġcaptive":20883,"ascus":20884,"MM":20885,"Never":20886,"ĠStyle":20887,"Ġeccentric":20888,"Ġpostponed":20889,"static":20890,"Ġdisabilities":20891,"ĠHolt":20892,"chet":20893,"ĠHonour":20894,"Because":20895,"http":20896,"Ġhast":20897,"Ġcoordination":20898,"ĠÃł":20899,"ĠRead":20900,"Ġbackgrounds":20901,"ĠPasha":20902,"Ġhurried":20903,"Ġracism":20904,"Ġmistakes":20905,"ĠZhou":20906,"owitz":20907,"Pacific":20908,"ÙĨ":20909,"Ġ1808":20910,"Ġshame":20911,"ĠBrendan":20912,"France":20913,"aea":20914,"aratus":20915,"ĠSerg":20916,"Ġonset":20917,"ophys":20918,"Ġdevised":20919,"Ġfiref":20920,"Ġdisin":20921,"Ġsel":20922,"Ġinventory":20923,"Ġviable":20924,"ĠFitzgerald":20925,"Ber":20926,"Ġtwist":20927,"ĠMog":20928,"Ġlawn":20929,"Ġrhy":20930,"Max":20931,"Ġobligations":20932,"Ġcob":20933,"Sem":20934,"Ġthickness":20935,"rared":20936,"Ġpitching":20937,"Ġsuppressed":20938,"circ":20939,"ĠLans":20940,"ĠImpro":20941,"loss":20942,"JP":20943,"Ġtremend":20944,"Ġate":20945,"Ġdevastated":20946,"Ġelectrom":20947,"umar":20948,"ĠIvy":20949,"ĠHighlands":20950,"Ġinforms":20951,"ĠNate":20952,"ĠSchmidt":20953,"ĠCatalan":20954,"ĠChak":20955,"Ġoccurrence":20956,"Ġrendering":20957,"Ġsensors":20958,"Ġreceptions":20959,"Ġrealizing":20960,"Ġintake":20961,"Chinese":20962,"ĠTrek":20963,"Ġbiblical":20964,"ĠGalaxy":20965,"ographers":20966,"ĠBally":20967,"ĠNut":20968,"Ġcourthouse":20969,")(":20970,"utic":20971,"chin":20972,"Ġassim":20973,"ĠPolitics":20974,"Ġsatisfaction":20975,"Mir":20976,"onga":20977,"ĠBac":20978,"ĠReleased":20979,"ĠNewsp":20980,"nance":20981,"ĠDram":20982,"ĠFlat":20983,"Ġnodes":20984,"ĠBax":20985,"Ġcage":20986,"ĠUP":20987,"ĠGreenwich":20988,"ecourse":20989,"Jac":20990,"ĠDaniels":20991,"ĠVA":20992,"ĠÏĦ":20993,"Ġfoul":20994,"ĠSW":20995,"ĠAssociates":20996,"eper":20997,"ĠCull":20998,"ĠMagdal":20999,"Ġspectacular":21000,"Ġspor":21001,"Ġstranger":21002,"Ġwatches":21003,"ĠÅļ":21004,"ĠDarren":21005,"ĠPartn":21006,"ĠAlternative":21007,"Ġgable":21008,"Ġsympathetic":21009,"sta":21010,"Royal":21011,"Ġrobbery":21012,"umbers":21013,"ĠTypically":21014,"Mur":21015,"ĠHague":21016,"Ġresume":21017,"Ġump":21018,"icularly":21019,"onel":21020,"ĠCharity":21021,"Ġrecapt":21022,"Hot":21023,"continental":21024,"Ġinsert":21025,"ĠVehic":21026,"ĠMozart":21027,"Ġmobility":21028,"ancies":21029,"Ġlimiting":21030,"Ġsubway":21031,"ĠSteelers":21032,"Ġregulate":21033,"ĠdÃ©":21034,"ipei":21035,"ĠKoz":21036,"cip":21037,"Bur":21038,"estan":21039,"iosity":21040,"Somet":21041,"tford":21042,"ĠThous":21043,"ucked":21044,"ĠRanger":21045,"ĠInterest":21046,"Ġleisure":21047,"Str":21048,"Ġwilderness":21049,"Ġbeneficial":21050,"asteries":21051,"ĠRajas":21052,"Ġshuttle":21053,"Ġstretching":21054,"ĠFi":21055,"Ã¶m":21056,"Ġpenet":21057,"Ġswallowed":21058,"brand":21059,"ĠSchwar":21060,"emberg":21061,"ĠCamden":21062,"Ġsuscept":21063,"Ġimplementing":21064,"lot":21065,"Ġhasn":21066,"Ġpressures":21067,"Îº":21068,"LD":21069,"ĠHip":21070,"Ġfitting":21071,"ĠOmar":21072,"ĠMagnus":21073,"adan":21074,"sung":21075,"Var":21076,"ĠDepend":21077,"Ġscal":21078,"ĠMacDonald":21079,"Ġ119":21080,"Ġladder":21081,"ĠFarn":21082,"Ġenforce":21083,"Ġsucc":21084,"ĠAlfonso":21085,"Ġeverybody":21086,"ĠDiane":21087,"Ġ1794":21088,"ĠHonduras":21089,"ĠLug":21090,"ĠApproximately":21091,"Ġmerit":21092,"Ġnode":21093,"ĠPGA":21094,"ĠKatie":21095,"Ġexams":21096,"Ġswords":21097,"cedented":21098,"ĠEvil":21099,"ĠUCI":21100,"Ġjungle":21101,"baum":21102,"ĠMini":21103,"Ġvein":21104,"ĠStuttgart":21105,"Ġextraction":21106,"ĠGloria":21107,"Ġprofitable":21108,"Ġesp":21109,"ĠBoul":21110,"ĠNoble":21111,"ĠBarth":21112,"ĠSeymour":21113,"ĠSimmons":21114,"vez":21115,"Ġdispar":21116,"Ġgesture":21117,"ĠBÃ©":21118,"Ġmonetary":21119,"ĠSamoa":21120,"ĠMord":21121,"Ġhed":21122,"Ġ1798":21123,"culosis":21124,"ĠDrag":21125,"ĠAunt":21126,"Ġbottles":21127,"ÅĦski":21128,"Âł2":21129,"Ġsparked":21130,"Ġpipes":21131,"igma":21132,"Ġpatrons":21133,"uctor":21134,"Ġgluc":21135,"ĠDominic":21136,"Ġexotic":21137,"Ġinvestor":21138,"ĠNicole":21139,"Ġlyr":21140,"Ġreasoning":21141,"hne":21142,"Ġphyl":21143,"mag":21144,"ĠRavens":21145,"Ġfeas":21146,"Ġworkforce":21147,"Under":21148,"Ð´":21149,"Ġoppose":21150,"ĠHassan":21151,"owment":21152,"Ġgrape":21153,"ĠIntel":21154,"angi":21155,"Ġmedi":21156,"Ġwholes":21157,"ĠRonnie":21158,"Ġacademics":21159,"ĠNina":21160,"ĠUncle":21161,"Ġinadequate":21162,"Po":21163,"Ġinfections":21164,"ĠTwelve":21165,"enko":21166,"Ġretrieve":21167,"iren":21168,"ĠES":21169,"Ġ1811":21170,"ĠHenn":21171,"ĠKras":21172,"olutions":21173,"Ġwaived":21174,"Ġeconomically":21175,"Ġcoral":21176,"Ġdepiction":21177,"ĠPoints":21178,"Ġcomplexes":21179,"ĠCors":21180,"Ġbrutal":21181,"ĠCelebr":21182,"mere":21183,"ĠEvangelical":21184,"nick":21185,"osaurs":21186,"Ġprosperity":21187,"ĠGott":21188,"ĠCharg":21189,"Ġshareholders":21190,"ĠÃħ":21191,"uations":21192,"Ġweekends":21193,"zew":21194,"ĠKick":21195,"Ġjewelry":21196,"Den":21197,"Cy":21198,"Ġstack":21199,"Ġpractitioners":21200,"Ġgrim":21201,"ĠViking":21202,"ĠSidd":21203,"ĠPerm":21204,"Ġdemons":21205,"Sund":21206,"ĠNumerous":21207,"hawk":21208,"ĠGreenland":21209,"Space":21210,"ĠAmber":21211,"Ġeman":21212,"Lo":21213,"Ġwise":21214,"ĠWilliamson":21215,"ĠWalton":21216,"aras":21217,"Ġsatellites":21218,"ĠPasc":21219,"Ġnobles":21220,"Ġsunlight":21221,"ĠGS":21222,"Ġmars":21223,"ĠNiss":21224,"ĠJain":21225,"ĠWire":21226,"These":21227,"uling":21228,"Ġpunch":21229,"ĠTrustees":21230,"ĠMGM":21231,"ĠSomalia":21232,"Ġstretches":21233,"ĠSunderland":21234,"Ġbehaviors":21235,"Ġcompulsory":21236,"Ġexagger":21237,"Ġ1795":21238,"Ġnost":21239,"bright":21240,"Ġleaning":21241,"Ġchimney":21242,"Ġextinction":21243,"Ġresemblance":21244,"Ġlimbs":21245,"Ġrubbed":21246,"ĠVul":21247,"Ġadvertisement":21248,"ĠWeston":21249,"ĠWigan":21250,"ĠVista":21251,"ĠStevenson":21252,"ĠBeaver":21253,"Ġextensions":21254,"Ġlikewise":21255,"Ġcel":21256,"Ġstaging":21257,"Ġcontinually":21258,"ĠPip":21259,"Ġelectrons":21260,"Ġdecorations":21261,"herty":21262,"ĠLiberals":21263,"islav":21264,"ĠRolling":21265,"ĠMiy":21266,"ocyt":21267,"reeze":21268,"Ġpapal":21269,"ĠFleming":21270,"Ġbeetles":21271,"Final":21272,"acity":21273,"Ġdiscusses":21274,"Ġdistribute":21275,"Ġbuilder":21276,"mounted":21277,"access":21278,"Ġvicar":21279,"Ġchuckled":21280,"itud":21281,"unks":21282,"ĠByr":21283,"ushi":21284,"inness":21285,"ĠCey":21286,"asonry":21287,"1967":21288,"riz":21289,"Ġ1805":21290,"ĠRee":21291,"HT":21292,"Ġreddish":21293,"Ġ1807":21294,"Ġorchestral":21295,"ĠGuerr":21296,"aye":21297,"ĠHR":21298,"ĠWheeler":21299,"Ġrud":21300,"ĠYi":21301,"Ġstructured":21302,"Ġfungi":21303,"ĠMate":21304,"evil":21305,"ĠArchdiocese":21306,"ĠLankan":21307,"ĠNormal":21308,"iple":21309,"Ġvoter":21310,"cular":21311,"meaning":21312,"Ġnotation":21313,"rypt":21314,"ĠHos":21315,"ĠAtlas":21316,"Ġbleeding":21317,"Ġpound":21318,"ĠDwight":21319,"ĠBologna":21320,"umont":21321,"ĠSupporting":21322,"Ġrepresentations":21323,"Tell":21324,"Ġvacated":21325,"æĿ":21326,"rust":21327,"Ġhumorous":21328,"Ġselective":21329,"ĠGert":21330,"Ġtenor":21331,"Ġtire":21332,"Ġentirety":21333,"igm":21334,"ogues":21335,"Ġdistress":21336,"Ġconferred":21337,"ĠMuss":21338,"ĠNun":21339,"Ġamalgam":21340,"eville":21341,"Ġpassport":21342,"Ġreck":21343,"ĠGazette":21344,"loe":21345,"ĠTeen":21346,"Ġdisappointing":21347,"ĠVy":21348,"Ġmodules":21349,"ĠAllison":21350,"ĠKyr":21351,"raged":21352,"Ġwagons":21353,"holic":21354,"Ġexh":21355,"Ġhandball":21356,"unga":21357,"Ġisot":21358,"ĠSmy":21359,"Arch":21360,"uably":21361,"ĠCot":21362,"esses":21363,"raper":21364,"ĠYas":21365,"Ġbowler":21366,"ĠWaterloo":21367,"Ġprone":21368,"Ġsliding":21369,"Ġmasculine":21370,"ĠHours":21371,"Ġprovisional":21372,"araj":21373,"Ġcolspan":21374,"Ġdioces":21375,"ĠEvening":21376,"near":21377,"ĠGrac":21378,"Ġideals":21379,"Ġdread":21380,"Âłl":21381,"ĠKak":21382,"ĠDodge":21383,"Ġreproduction":21384,"Ġpoetic":21385,"Ġchiefs":21386,"ĠScr":21387,"Ġsemic":21388,"Dark":21389,"orah":21390,"opus":21391,"ĠElite":21392,"zyn":21393,"ĠClaus":21394,"Ġrejection":21395,"Ġkeyboards":21396,"ĠColts":21397,"ĠPenny":21398,"Category":21399,"Ġprompting":21400,"looking":21401,"ĠPike":21402,"ĠLinn":21403,"ĠSuddenly":21404,"inist":21405,"stals":21406,"ĠMud":21407,"Ġribs":21408,"Ġtravers":21409,"Ġpromptly":21410,"ĠCorinth":21411,"Ġlovers":21412,"ĠAdministrative":21413,"Ġpresumed":21414,"Ġhiring":21415,"fest":21416,"ĠHolden":21417,"amoto":21418,"ĠMerr":21419,"Ġsubscrib":21420,"ĠMoy":21421,"utherland":21422,"ĠIpswich":21423,"Ġmotivation":21424,"ĠWave":21425,"ĠAustro":21426,"Ġattracting":21427,"ĠRelief":21428,"History":21429,"ĠMari":21430,"Like":21431,"Ġlungs":21432,"ĠSamp":21433,"Ġappointments":21434,"odon":21435,"Ġverbal":21436,"atas":21437,"stick":21438,"ĠChop":21439,"ĠBeir":21440,"Ġcollectors":21441,"LO":21442,"ĠOrient":21443,"ĠSundays":21444,"ĠMarse":21445,"Ġancestral":21446,"Ġhelm":21447,"generation":21448,"Ġcharging":21449,"awan":21450,"Ġunreleased":21451,"Ġsnap":21452,"ĠAbbott":21453,"oic":21454,"Ġdevelopmental":21455,"Ġresidency":21456,"Ġbreasts":21457,"vex":21458,"Ġhostage":21459,"Ġgovernors":21460,"Ġsubordinate":21461,"House":21462,"Ġbog":21463,"Ġcolonists":21464,"Ġphysicist":21465,"ĠCON":21466,"avour":21467,"ĠDivine":21468,"nas":21469,"Ġshores":21470,"Ġuranium":21471,"won":21472,"ĠGraves":21473,"itian":21474,"ĠGavin":21475,")-":21476,"Ġexpeditions":21477,"Ġcoastline":21478,"ĠSterling":21479,"ĠSure":21480,"Ġunhappy":21481,"Ġbackward":21482,"Ġpatronage":21483,"Rev":21484,"Ġoutlined":21485,".-":21486,"ĠHansen":21487,"ĠPackers":21488,"ĠLatvian":21489,"ĠNorse":21490,"Ġdose":21491,"ophil":21492,"ĠMedic":21493,"pend":21494,"Ġling":21495,"Ġcrystall":21496,"Av":21497,"ĠIrene":21498,"Ġissuing":21499,"Ġmarching":21500,"ĠImport":21501,"Ġhindwings":21502,"urian":21503,"Ġnominal":21504,"Ġemploying":21505,"ĠUnity":21506,"Ġverdict":21507,"eddy":21508,"Ġpose":21509,"Step":21510,"Ġuncovered":21511,"ĠVon":21512,"Ġmeditation":21513,"Hop":21514,"Ġgrief":21515,"ĠDerbyshire":21516,"Ġsemifinal":21517,"Ġobscure":21518,"Ġdocumentaries":21519,"Ġ1600":21520,"ĠTeresa":21521,"Ġflora":21522,"Ġimped":21523,"ĠRodriguez":21524,"Ġmartyr":21525,"Law":21526,"ĠMLS":21527,"ibi":21528,"Ġgenerous":21529,"Ġthoroughly":21530,"Ġrays":21531,"ĠSho":21532,"Ġliability":21533,"ĠSki":21534,"Ġorbital":21535,"ĠXu":21536,"ĠLoss":21537,"Ġ1780":21538,"Ġrecruits":21539,"Ġnineteen":21540,"esi":21541,"Ġeliminating":21542,"Ġunl":21543,"Sorry":21544,"ĠME":21545,"ĠShut":21546,"unit":21547,"Ġmutations":21548,"azzo":21549,"ĠBrittany":21550,"Ġconversations":21551,"Ġdiscovering":21552,"Ġmarrying":21553,"ĠJules":21554,"ranking":21555,"Ġray":21556,"prim":21557,"ĠActing":21558,"Ġreferenced":21559,"Ġshortage":21560,"Ġrenovations":21561,"uo":21562,"ĠInnovation":21563,"estine":21564,"Ġfundraising":21565,"Ġgreeted":21566,"Emp":21567,"ĠPerkins":21568,"aisy":21569,"rs":21570,"Ġbeloved":21571,"Ġdefinitions":21572,"ĠFlemish":21573,"Ġbeef":21574,"ovÃ¡":21575,"Ġfailures":21576,"jun":21577,"shan":21578,"Ġreproductive":21579,"Ġcasino":21580,"omat":21581,"waters":21582,"Ġunwilling":21583,"Ġkissing":21584,"Ġbrace":21585,"Ġturbine":21586,"Ġumbrella":21587,"Ġunchanged":21588,"ĠTarg":21589,"Ġinfect":21590,"ĠDoct":21591,"ĠStark":21592,"ĠDamascus":21593,"ĠTitan":21594,"Ġluc":21595,"ĠDorset":21596,"ĠFrontier":21597,"ĠTHE":21598,"ĠMyers":21599,"ĠTaipei":21600,"Ġpioneered":21601,"Ġshowcase":21602,"ĠNationals":21603,"witz":21604,"Ġhered":21605,"Ġescaping":21606,"Ã¤n":21607,"ĠHappy":21608,"Def":21609,"Ġwavelength":21610,"ĠStarr":21611,"Ġsensitivity":21612,"Ġpredecessors":21613,"UT":21614,"ĠMining":21615,"Ġbanker":21616,"Ġadverse":21617,"Ġscreaming":21618,"Ġerupted":21619,"Ġblown":21620,"ĠSuperintendent":21621,"Ġrewarded":21622,"Ġchancellor":21623,"Hello":21624,"Ġmural":21625,"Ġunpre":21626,"inians":21627,"ÂłMHz":21628,"Ġconstructing":21629,"Ġblanket":21630,"ĠProphet":21631,"enter":21632,"gradation":21633,"Ġwhites":21634,"Ġ1804":21635,"ĠCyn":21636,"swald":21637,"Ġloving":21638,"NFL":21639,"sville":21640,"Ġhairs":21641,"ĠKitchen":21642,"frey":21643,"Ã¢teau":21644,"Ġdressing":21645,"ĠMozamb":21646,"à¥į":21647,"ĠEstablished":21648,"Ġpirates":21649,"ĠCell":21650,"ooked":21651,"Ġgenerator":21652,"ĠForrest":21653,"asht":21654,"Ġculminated":21655,"district":21656,"ĠGiuseppe":21657,"Smith":21658,"tta":21659,"ĠJuliet":21660,"Mer":21661,"Ġgrossed":21662,"ĠThing":21663,"Ġcombinations":21664,"Ġaliens":21665,"ĠHawkins":21666,"ĠRenault":21667,"Marie":21668,"Ġnetworking":21669,"Ray":21670,"nor":21671,"Ġfleeing":21672,"erver":21673,"ĠExc":21674,"Ġsteals":21675,"Ġdissip":21676,"Ġturnout":21677,"Ġimmers":21678,"ĠJosef":21679,"ĠRath":21680,"ĠShim":21681,"ĠPhi":21682,"Over":21683,"etically":21684,"usch":21685,"ĠRegina":21686,"signed":21687,"Ġanchored":21688,"Ġbooth":21689,"ĠUse":21690,"Ġfertile":21691,"ĠExpressway":21692,"ĠCountess":21693,"lighten":21694,"Ġlag":21695,"Ġhttps":21696,"ĠMB":21697,"nica":21698,"ĠKant":21699,"1945":21700,"Ġcyt":21701,"ĠXin":21702,"Ġquadr":21703,"Ġchecking":21704,"Ġscrut":21705,"mese":21706,"Ġfunctionality":21707,"ĠRebellion":21708,"Ġsubscription":21709,"ĠLahore":21710,"Ap":21711,"ĠPayne":21712,"Ġpatrols":21713,"bilt":21714,"ĠGob":21715,"enian":21716,"minded":21717,"ĠGovernorate":21718,"Ġpopul":21719,"ĠGerard":21720,"ĠNavig":21721,"obil":21722,"union":21723,"isy":21724,"orns":21725,"ĠKimber":21726,"bral":21727,"nesty":21728,"ĠGuitar":21729,"ĠWitch":21730,"solete":21731,"Ġhatred":21732,"Ġcompliment":21733,"quality":21734,"Ġhymn":21735,"raught":21736,"Ġvolunteered":21737,"1930":21738,"Ġauditorium":21739,"ĠGiant":21740,"Ġdwelling":21741,"Ġ1802":21742,"Di":21743,"aty":21744,"odi":21745,"Ġbombardment":21746,"Gal":21747,"ĠMartine":21748,"Ġplague":21749,"ĠMajesty":21750,"ĠUsually":21751,"Ġtransparent":21752,"ĠBres":21753,"ĠPoor":21754,"Ġattachment":21755,"Ġprehistoric":21756,"Ġseminary":21757,"Ġcaut":21758,"Ġdispersed":21759,"uffed":21760,"Ġsynagogue":21761,"ĠBR":21762,"Western":21763,"Ġequilibrium":21764,"Ġwinters":21765,"Ġguides":21766,"Ġdisturbed":21767,"tec":21768,"Ġgasoline":21769,"Ã¨ge":21770,"Ġsociology":21771,"beh":21772,"ĠRivera":21773,"ĠfaÃ§":21774,"Dam":21775,"rolet":21776,"Ġneurons":21777,"Ġnoon":21778,"ĠLec":21779,"Ġassignments":21780,"ĠMelissa":21781,"ĠFREE":21782,"Ġmetallic":21783,"Ġdella":21784,"ancock":21785,"ĠMcCart":21786,"ĠGermanic":21787,"ĠOce":21788,"Ġtossed":21789,"ĠPeruvian":21790,"asso":21791,"etsk":21792,"Ġbru":21793,"ographs":21794,"Ġstepping":21795,"Dead":21796,"ĠGore":21797,"Ġpurse":21798,"idia":21799,"ĠHag":21800,"ĠCastile":21801,"Ġintercepted":21802,"Ġpromoter":21803,"Ġdevotion":21804,"ĠSv":21805,"emy":21806,"DO":21807,"Ġhomage":21808,"ĠTC":21809,"ĠIdol":21810,"HR":21811,"Ġamusement":21812,"flower":21813,"Ġconsortium":21814,"Ġshoe":21815,"Ġnonetheless":21816,"ĠPemb":21817,"ĠGoa":21818,"Ġfeder":21819,"ĠBahÃ¡":21820,"ĠTao":21821,"Ġdevastating":21822,"Ġtrades":21823,"ĠHarlem":21824,"amboo":21825,"Ġ1792":21826,"Âłbillion":21827,"Ġunstable":21828,"inched":21829,"ĠAllmusic":21830,"Ġsap":21831,"ĠVince":21832,"Ġsacrific":21833,"gee":21834,"ividing":21835,"Ġgentleman":21836,"Ġapplicable":21837,"Ġcurator":21838,"Ġul":21839,"ĠPiper":21840,"ĠCT":21841,"Ġwestward":21842,"Ø±":21843,"Ġcartridge":21844,"meter":21845,"ĠOsaka":21846,"ĠPull":21847,"ĠHerr":21848,"Last":21849,"Ġdismissal":21850,"Ġswung":21851,"LI":21852,"areth":21853,"Ã¬":21854,"ĠOpposition":21855,"ĠSob":21856,"ĠIA":21857,"ĠAnalysis":21858,"ĠSchu":21859,"Ġconcluding":21860,"1965":21861,"Ġdip":21862,"ĠNoel":21863,"Ġunprecedented":21864,"owell":21865,"ĠAlam":21866,"Ġmigrants":21867,"ĠLennon":21868,"Ġions":21869,"Ġslate":21870,"Ġauthentic":21871,"Ġvag":21872,"Ġminiseries":21873,"roller":21874,"ĠBetter":21875,"Ġskeleton":21876,"Ġenzymes":21877,"achy":21878,"ĠTes":21879,"Ġyesterday":21880,"Ġfraternity":21881,"ĠMormon":21882,"ĠPartnership":21883,"sson":21884,"ĠDifferent":21885,"Saturday":21886,"nch":21887,"Ã©tico":21888,"Nothing":21889,"ayana":21890,"Ġgeometric":21891,"ĠLaurent":21892,"ĠPrimera":21893,"anka":21894,"rels":21895,"gren":21896,"Ġjockey":21897,"Ġwines":21898,"area":21899,"orio":21900,"Ġsongwriting":21901,"Ġinterpretations":21902,"Ġwells":21903,"ĠHP":21904,"Ġminiature":21905,"enb":21906,"ĠTill":21907,"ĠTuls":21908,"Ġinterception":21909,"Cast":21910,"ĠRene":21911,"Ġdrained":21912,"Ġarched":21913,"Ġmedalist":21914,"eningrad":21915,"ĠRapids":21916,"Ġcirca":21917,"ĠLionel":21918,"Ġsubstrate":21919,"Ġprostitution":21920,"ĠGuru":21921,"Washington":21922,"large":21923,"Ġcontests":21924,"Ġapple":21925,"Ġchol":21926,"Ġtortured":21927,"Ġsentiment":21928,"ĠBavarian":21929,"Ġignor":21930,"thorpe":21931,"ĠPolytechnic":21932,"ĠPiano":21933,"Ġquartet":21934,"ĠMayo":21935,"Ġalpine":21936,"acha":21937,"ĠTurb":21938,"Ġprosecutor":21939,"Ġballots":21940,"Fred":21941,"Ġgranting":21942,"ustrated":21943,"ĠOman":21944,"ĠKilk":21945,"opath":21946,"Ġaddiction":21947,"arh":21948,"ĠFischer":21949,"ĠJohan":21950,"Ġorganism":21951,"ĠBeta":21952,"Ġvisa":21953,"Ġangels":21954,"Ġtitular":21955,"ĠEra":21956,"ĠGus":21957,"ĠTaiwanese":21958,"ĠUltimate":21959,"Four":21960,"ĠEdith":21961,"disciplinary":21962,"Ġbrack":21963,"glass":21964,"Ġwarmth":21965,"Ġgroc":21966,"Ġmeg":21967,"Ġhears":21968,"Ġathe":21969,"ĠHuang":21970,"ĠWillow":21971,"ĠJakarta":21972,"Ġowed":21973,"Ġoriginates":21974,"Ġresisted":21975,"Ġsuffrage":21976,"date":21977,"ĠRestoration":21978,"Ġapparatus":21979,"Ġclever":21980,"ĠAutonomous":21981,"cost":21982,"Ġsinc":21983,"ĠElisabeth":21984,"ĠFritz":21985,"Ġdrown":21986,"ĠComic":21987,"ographically":21988,"ĠKarachi":21989,"Ġconvincing":21990,"Ġobserving":21991,"ĠDepot":21992,"ĠTap":21993,"iggs":21994,"ĠSuperv":21995,"azy":21996,"Ġredesignated":21997,"Ġharassment":21998,"ĠExcept":21999,"ĠResolution":22000,"Ġencourages":22001,"ĠAid":22002,"ĠGenoa":22003,"ĠGel":22004,"Hungarian":22005,"Ġyields":22006,"Ġcommuter":22007,"Bay":22008,"ĠAragon":22009,"viol":22010,"kef":22011,"Ã¡d":22012,"Ġdevil":22013,"Ġmedication":22014,"ĠDise":22015,"Ġabnormal":22016,"ĠIRA":22017,"ilated":22018,"Ġsperm":22019,"atan":22020,"Ġgy":22021,"ĠStones":22022,"ĠCatholicism":22023,"athed":22024,"Ġpad":22025,"ĠTorn":22026,"ethe":22027,"ĠMitch":22028,"roads":22029,"ĠIsabel":22030,"ĠChristchurch":22031,"glomer":22032,"!\".":22033,"Ġnotices":22034,"Girl":22035,"video":22036,"Ġvacancy":22037,"Ġthunder":22038,"{{{":22039,"Ġcontributes":22040,"Ġtolerance":22041,"ÙĬ":22042,"Ġpray":22043,"guez":22044,"full":22045,"ĠKand":22046,"Ġexplorer":22047,"110":22048,"rogen":22049,"ĠBerkshire":22050,"ĠWyatt":22051,"ĠReports":22052,"urgy":22053,"Ġ1796":22054,"ĠJudy":22055,"Ġdrif":22056,"Ġzomb":22057,"ĠCald":22058,"tier":22059,"ĠRi":22060,"andez":22061,"Î·":22062,"ĠRama":22063,"Ġteens":22064,"Ġgymnasium":22065,"ĠNaw":22066,"1966":22067,"Ġsleeve":22068,"Ġfederation":22069,"vous":22070,"ĠHC":22071,"ĠMurd":22072,"abo":22073,"Ġexcuse":22074,"Ġpatriarch":22075,"Ġfamed":22076,"Ġredevelopment":22077,"Ġweld":22078,"ĠBing":22079,"Ġchancel":22080,"ĠSteele":22081,"Ġcharacterised":22082,"Ġupward":22083,"athing":22084,"Ġfont":22085,"Ġduplic":22086,"ĠAntioch":22087,"Ġtracked":22088,"ĠTales":22089,"ulse":22090,"GI":22091,"atur":22092,"olation":22093,"Ġbatch":22094,"Game":22095,"Ġblockade":22096,"Ġdemonstrates":22097,"Ter":22098,"ferred":22099,"Heart":22100,"Wild":22101,"atore":22102,"proof":22103,"ĠBrick":22104,"ĠOwens":22105,"Ġtoilet":22106,"Ġalternating":22107,"Ġsymmetry":22108,"Ġkindergarten":22109,"Ġexamining":22110,"Ġsacks":22111,"ĠZÃ¼":22112,"ĠSI":22113,"ĠLj":22114,"Ġurging":22115,"Ġprolonged":22116,"Ġcommentators":22117,"Ġiter":22118,"ĠBraun":22119,"Ġdelicate":22120,"Radio":22121,"Islam":22122,"Ġhabits":22123,"Liber":22124,"ĠAssam":22125,"Fore":22126,"ĠBolshev":22127,"Ġunse":22128,"aqu":22129,"ĠCarth":22130,"ĠFalcons":22131,"Dem":22132,"ĠCarbon":22133,"Ġelephant":22134,"oran":22135,"Ġsaints":22136,"Ġelegant":22137,"ĠLep":22138,"ĠBihar":22139,"Ġlesson":22140,"ĠCeylon":22141,"ulton":22142,"ĠLuna":22143,"ĠVia":22144,"ĠNamibia":22145,"Ġfeudal":22146,"ĠCould":22147,"Ġblades":22148,"ĠVerde":22149,"ĠPurd":22150,"ĠWN":22151,"Ġdistract":22152,"Ġwarships":22153,"Ġprocession":22154,"atholic":22155,"Ġaiming":22156,"ĠWine":22157,"Ġensured":22158,"Ġupstairs":22159,"...âĢĿ":22160,"Ġfinalists":22161,"Ġassumes":22162,"ĠPoles":22163,"rÃŃguez":22164,"ĠMercy":22165,"Ġaluminium":22166,"xy":22167,"Ġ1789":22168,"nine":22169,"Ġpioneers":22170,"Ġretailers":22171,"ĠAnk":22172,"ĠMonaco":22173,"ographies":22174,"ĠPhillies":22175,"ĠChamberlain":22176,"ĠAutom":22177,"Times":22178,"ande":22179,"Ġentertaining":22180,"Ġportable":22181,"Ġreissued":22182,"Ġjun":22183,"Ġreliability":22184,"ewood":22185,"Ġprejud":22186,"ĠDevils":22187,"ĠCW":22188,"Ġranged":22189,"ĠLimerick":22190,"atical":22191,"Ġsomebody":22192,"ĠChong":22193,"Ġbiod":22194,"Ġ(#":22195,"ĠWet":22196,"Ġsolitary":22197,"Rem":22198,"ĠThink":22199,"Ġacquaint":22200,"Ġmurm":22201,"sonian":22202,"arina":22203,"Ġmosa":22204,"Ġphotographed":22205,"Ġafore":22206,"Ġdissem":22207,"ĠCertificate":22208,"ttes":22209,"1964":22210,"Ġimmigrated":22211,"Ġpillars":22212,"Åĳ":22213,"ĠJennings":22214,"Ġchartered":22215,"purpose":22216,"Ġtrustee":22217,"Fi":22218,"ĠCollier":22219,"guy":22220,"ĠSau":22221,"Ġconfronts":22222,"Indian":22223,"ĠVanderbilt":22224,"Net":22225,"ossibly":22226,"Ġpackages":22227,"bands":22228,"Ġastronomy":22229,"nie":22230,"Ġchecks":22231,"125":22232,"Ġtreason":22233,"orraine":22234,"ochond":22235,"ĠBuchanan":22236,"Ġculminating":22237,"Ġupheld":22238,"rehend":22239,"Ġlent":22240,"Ġmistress":22241,"termin":22242,"Ġedit":22243,"defined":22244,"ĠSuf":22245,"ĠGiles":22246,"ĠCoul":22247,"Ġautomotive":22248,"aer":22249,"ĠBeirut":22250,"Ġillustrator":22251,"ĠOkinawa":22252,"Ġdominate":22253,"ĠSolid":22254,"wife":22255,"Ġemblem":22256,"ĠRodrÃŃguez":22257,"Ġsells":22258,"ĠZak":22259,"Ġcockpit":22260,"gel":22261,"Ġforts":22262,"ĠMicha":22263,"ĠJonas":22264,"Ġlou":22265,"Ġnud":22266,"ĠSheridan":22267,"rophic":22268,"Right":22269,"phe":22270,"Ġreapp":22271,"ĠChance":22272,"ĠXII":22273,"arro":22274,"ĠTS":22275,"Ġseparating":22276,"ĠGoddess":22277,"ĠTudor":22278,"Ġdeport":22279,"Ġdemographic":22280,"agonists":22281,"brates":22282,"ĠMae":22283,"Ġservers":22284,"Ġcubic":22285,"Ġcandidacy":22286,"ĠGap":22287,"ĠXia":22288,"Ġsalmon":22289,"Ġbrewery":22290,"ĠVenetian":22291,"?'":22292,"Ġallegiance":22293,"Ġcombust":22294,"casters":22295,"Ġgases":22296,"ĠRI":22297,"Ġ1776":22298,"Ġtranslates":22299,"Ġdisplaying":22300,"ĠKurdish":22301,"ĠFarr":22302,"UM":22303,"ĠAbel":22304,"Ġprivilege":22305,"ĠCarmel":22306,"ĠLafayette":22307,"Ġlava":22308,"Ġpostseason":22309,"ĠBeauty":22310,"itle":22311,"Ġparted":22312,"ĠGlad":22313,"Ġfooth":22314,"Ġgloss":22315,"ĠCrosby":22316,"Bat":22317,"station":22318,"Ġduel":22319,"Ġtranscript":22320,"ibus":22321,"Ġconstituent":22322,"sided":22323,"Ġsorts":22324,"ulam":22325,"Ġ113":22326,"Ġfarmland":22327,"opot":22328,"Ġnoun":22329,"onge":22330,"Ġattach":22331,"ĠOlive":22332,"Ġthou":22333,"Ġreservation":22334,"Ġparked":22335,"Ġfavoured":22336,"Ġobstacles":22337,"Ġvampires":22338,"Ġarbitrary":22339,"ĠFS":22340,"ricanes":22341,"ĠChristina":22342,"usions":22343,"Ġblessed":22344,"Ġpsychiatric":22345,"flix":22346,"ĠWey":22347,"Ġ1200":22348,"Ġkingdoms":22349,"Ġfresco":22350,"ĠEvelyn":22351,"ĠArrow":22352,"Ġ135":22353,"ĠPlateau":22354,"Ġutilize":22355,"Ġpilgrimage":22356,"eti":22357,"Ġactivism":22358,"Ġenthusiastic":22359,"ĠChip":22360,"obia":22361,"hara":22362,"ĠRF":22363,"ĠElliot":22364,"ĠHang":22365,"arie":22366,"Ġhomosexuality":22367,"ĠVC":22368,"arb":22369,"Ġglobally":22370,"Ġpadd":22371,"Sure":22372,"NI":22373,"ĠQuartet":22374,"Ġpatches":22375,"ĠChandler":22376,"Ts":22377,"ĠJob":22378,"Ġoutline":22379,"ruce":22380,"ĠBowie":22381,"ĠWatts":22382,"Ġunfair":22383,"ĠDevi":22384,"ĠNile":22385,"Ġreverted":22386,"ilis":22387,"ĠLeinster":22388,"agher":22389,"Ali":22390,"Ġneural":22391,"othic":22392,"Ġwheelchair":22393,"ĠHertford":22394,"ĠRefuge":22395,"Roy":22396,"Ġdebated":22397,"ĠMosque":22398,"atorium":22399,"Ġrecipients":22400,"Ġdash":22401,"ĠEarlier":22402,"ĠAndreas":22403,"ĠShri":22404,"XX":22405,"ĠTou":22406,"Ġwax":22407,"ĠEisenh":22408,"Ġpits":22409,"Ġrats":22410,"home":22411,"conscious":22412,"ĠApostolic":22413,"Ġpreserving":22414,"Ġcrude":22415,"haven":22416,"ĠEnsemble":22417,"ansen":22418,"Ġpremature":22419,"Israel":22420,"nsic":22421,"Ġobliged":22422,"ĠWah":22423,"ĠSept":22424,"Ġpharmac":22425,"Ġinfamous":22426,"onte":22427,"Ġcommunes":22428,"ĠKrakÃ³w":22429,"lich":22430,"Ġdiscrimin":22431,"Ġhonoured":22432,"stud":22433,"ĠChevrolet":22434,"Ġfel":22435,"vre":22436,"Ġbrakes":22437,"themed":22438,"Ġmush":22439,"Ġfined":22440,"Ġchiefly":22441,"ĠJubilee":22442,"ĠIk":22443,"Ġcontingent":22444,"ĠLÃ¼":22445,"orie":22446,"Ġlatitude":22447,"store":22448,"Ġpassionate":22449,"Ġoffence":22450,"OH":22451,"Ñı":22452,"Ġtakeover":22453,"Ġincredible":22454,"amorph":22455,"ĠPors":22456,"Ġadminister":22457,"lÃ©":22458,"Ġdrill":22459,"ĠNice":22460,"Ġcommunal":22461,"Ġrept":22462,"ĠNames":22463,"ĠBosnian":22464,"uler":22465,"ĠBam":22466,"ĠMegan":22467,"bins":22468,"ĠAbove":22469,"Ġneglect":22470,"ÄģbÄģd":22471,"itating":22472,"Ġannouncer":22473,"ĠCoss":22474,"Ġobsolete":22475,"attack":22476,"ĠEsther":22477,"Ġimmense":22478,"ĠHumanities":22479,"Ġincoming":22480,"Ġfrigate":22481,"ĠCannon":22482,"ĠStirling":22483,"ahar":22484,"adar":22485,"iotic":22486,"Ġlicenses":22487,"fessional":22488,"ĠEntry":22489,"chan":22490,"tef":22491,"ĠGloucestershire":22492,"Ġcompare":22493,"Ġlets":22494,"Ġdonor":22495,"Ġhid":22496,"Ġdislik":22497,"Ġvoid":22498,"Death":22499,"ĠVor":22500,"ships":22501,"Broad":22502,"ĠLeningrad":22503,"Ġ1799":22504,"ĠOss":22505,"Ġsignaling":22506,"Ġprevents":22507,"Ġscrub":22508,"Ġhorns":22509,"Ġcrowded":22510,"dar":22511,"ĠClose":22512,"etus":22513,"Ġnewcom":22514,"Ġpope":22515,"Ġbrake":22516,"ĠTouch":22517,"gas":22518,"Ġreelection":22519,"isson":22520,"Ġ116":22521,"arcer":22522,"Canadian":22523,"Ġdictators":22524,"enov":22525,"olesc":22526,"Ġpetroleum":22527,"Ġliberty":22528,"ĠGuam":22529,"establ":22530,"ĠRecon":22531,"ĠRous":22532,"Ġyacht":22533,"ĠVolks":22534,"Ġcancellation":22535,"Ġfreelance":22536,"ĠNicaragua":22537,"esta":22538,"Ġrenewable":22539,"terdam":22540,"arently":22541,"ĠElectrical":22542,"Ġturret":22543,"Ġreluctantly":22544,"Irish":22545,"ĠHavana":22546,"ĠKut":22547,"Ġ750":22548,"ussy":22549,"ructive":22550,"Ġevaluated":22551,"Ġadopting":22552,"Ġintersects":22553,"Ġacknowledge":22554,"Ġknocking":22555,"ificant":22556,"ĠMarketing":22557,"ĠEmerson":22558,"ĠNiz":22559,"osi":22560,"Ġlav":22561,"ĠElvis":22562,"ĠGret":22563,"Ġstripes":22564,"Ġcone":22565,"Ġlaboratories":22566,"ĠLough":22567,"sers":22568,"Ġlegitim":22569,"cs":22570,"å¤":22571,"ĠMansfield":22572,"ĠSioux":22573,"ĠBold":22574,"Ġinvalid":22575,"anie":22576,"Ġpopularly":22577,"Ġpackaging":22578,"Ġrelies":22579,"Ġbip":22580,"ĠElectronics":22581,"ĠSwansea":22582,"Ġprescribed":22583,"Ġspecifications":22584,"uliar":22585,"Ġdetermines":22586,"Ġbreathe":22587,"Ġcontemporaries":22588,"Ġtragic":22589,"Ġconfirmation":22590,"Ġpresidents":22591,"ĠComing":22592,"ĠCourts":22593,"ĠEmmanuel":22594,"Ġarrange":22595,"Ġlovely":22596,"cker":22597,"ĠThess":22598,"spons":22599,"Ġmenu":22600,"GR":22601,"Ġcorpse":22602,"Ġswamp":22603,"ĠLowe":22604,"Ġconverting":22605,"ĠEnc":22606,"áĥ":22607,"ĠDeleg":22608,"spoken":22609,"Ġfilmmakers":22610,"aney":22611,"Ġatom":22612,"Ġconquer":22613,"Ġsolving":22614,"Ġexaminations":22615,"ĠScholar":22616,"Saxon":22617,"ĠStella":22618,"Ġclearance":22619,"Ġbullets":22620,"hearted":22621,"Ġcrush":22622,"Ġjer":22623,"Ġmortgage":22624,"Ġincap":22625,"Ġproposes":22626,"Ġconsul":22627,"Ġdomest":22628,"Ġtelescope":22629,"ĠViolet":22630,"ĠHimal":22631,"ĠSwe":22632,"iaison":22633,"Ġdos":22634,"Ġpuzzle":22635,"operation":22636,"Ġwhor":22637,"ĠClifford":22638,"ĠTrap":22639,"Ġvilla":22640,"Ġinnovations":22641,"ĠSources":22642,"Jewish":22643,"Ġrefined":22644,"ĠLexington":22645,"ĠWikipedia":22646,"worthy":22647,"Ġdesires":22648,"Ġwishing":22649,"pless":22650,"itri":22651,"avis":22652,"ĠSutherland":22653,"ĠAK":22654,"alese":22655,"ĠVamp":22656,"Ġexpresses":22657,"upta":22658,"ĠStras":22659,"illary":22660,"Ġkern":22661,"ĠElm":22662,"ĠRahman":22663,"ĠMum":22664,"piring":22665,"Ġpodcast":22666,"ĠCrew":22667,"Ġperimeter":22668,"Ġstatutory":22669,"ĠWR":22670,"Ġtricks":22671,"ogi":22672,"ĠBollywood":22673,"Ġassassinated":22674,"ĠGoodman":22675,"Ġunnecessary":22676,"Ġben":22677,"ĠGior":22678,"Ġinvisible":22679,"ĠLightning":22680,"Ġboiler":22681,"ĠChet":22682,"101":22683,"ĠHM":22684,"Ġtuition":22685,"Ġbeams":22686,"ĠFlood":22687,"Ġsympath":22688,"Ġaccelerated":22689,"ĠDictionary":22690,"Ġrecruitment":22691,"ĠProducer":22692,"player":22693,"ĠWarm":22694,"nis":22695,"Ġlone":22696,"cler":22697,"ĠHof":22698,"Ġpersistent":22699,"ĠDraw":22700,"qa":22701,"Ġcos":22702,"ĠHancock":22703,"Ġlinebacker":22704,"Ã¢hu":22705,"Ġspokesperson":22706,"Camp":22707,"ĠSent":22708,"ĠTry":22709,"odus":22710,"odrome":22711,"ĠLaos":22712,"Ġdramas":22713,"Ġballoon":22714,"ĠThornton":22715,"Ġenvelope":22716,"Ġenforced":22717,"Ġcanoe":22718,"ĠLevi":22719,"ĠPerman":22720,"ĠRescue":22721,"thia":22722,"ĠDanube":22723,"Ġblessing":22724,"Ġdefences":22725,"ĠChern":22726,"à°":22727,"Ġwoke":22728,"ĠMarcos":22729,"ĠMillion":22730,"Ġdiabetes":22731,"Ġpenc":22732,"ĠChit":22733,"Ġimprint":22734,"chem":22735,"inished":22736,"ĠKry":22737,"Ġsergeant":22738,"Ġpix":22739,"Ġastronomer":22740,"overing":22741,"Ġreigning":22742,"Ġkicking":22743,"ĠEpisode":22744,"Ġfurious":22745,"Äģr":22746,"ĠWelfare":22747,"Ġgrocery":22748,"Ġlatt":22749,"raj":22750,"Ġgeology":22751,"identified":22752,"Ġfluct":22753,"Ġprincipally":22754,"ĠCatalonia":22755,"Pass":22756,"igue":22757,"linear":22758,"Ġidentities":22759,"Ġreprinted":22760,"Ġsqueezed":22761,"Ġpatented":22762,"ĠResort":22763,"Ġfauna":22764,"Ġpledged":22765,"TM":22766,"Ġtemperate":22767,"ssel":22768,"ĠSchum":22769,"Ġelbow":22770,"Captain":22771,"Ġheights":22772,"ĠCoastal":22773,"Ġhydraulic":22774,"Ġclutch":22775,"Ġreceivers":22776,"friendly":22777,"ĠSain":22778,"YP":22779,"Ġflaw":22780,"Ġbricks":22781,"table":22782,"ĠBury":22783,"Ġoverc":22784,"ĠAlv":22785,"ĠZo":22786,"hound":22787,"tank":22788,"ouk":22789,"heny":22790,"ĠJohannesburg":22791,"guitar":22792,"Ġsixteenth":22793,"ĠStephens":22794,"numbered":22795,"ianc":22796,"Ġsurplus":22797,"rax":22798,"Ġqualifications":22799,"ĠNationalist":22800,"ativity":22801,"Ġresembling":22802,"Ġrailroads":22803,"Ġsanctioned":22804,"Ġ1797":22805,"Ġphilanthropist":22806,"governmental":22807,"Ġmemoirs":22808,"Ġchooses":22809,"Ġamass":22810,"ĠEMI":22811,"Ġthirteenth":22812,"Ġnationals":22813,"Ġoxide":22814,"VE":22815,"Ġbuttons":22816,"otilla":22817,"Ġadaptations":22818,"Ġadministrators":22819,"Ġconclude":22820,"Ġdeadline":22821,"ĠLanding":22822,"ĠRapid":22823,"Ġslammed":22824,"Ġportraying":22825,"ĠDR":22826,"ĠHarriet":22827,"Ġreplica":22828,"Ġdisappro":22829,"appropriate":22830,"Ġposters":22831,"ĠSavannah":22832,"ĠTerritorial":22833,"ĠPÃ©rez":22834,"Ġlapt":22835,"Ġcurrents":22836,"flight":22837,"skins":22838,"ĠHerc":22839,"Ġjustified":22840,"ĠGros":22841,"iyah":22842,"Ġwarming":22843,"Ġunexpectedly":22844,"Ġ114":22845,"ĠSens":22846,"ĠBrotherhood":22847,"ĠCoc":22848,"ĠHes":22849,"ĠWelles":22850,"Ġwal":22851,"originally":22852,"ĠTorah":22853,"ĠFurn":22854,"Ġcaptivity":22855,"Ġembraced":22856,"Ġundertake":22857,"Ġanalyzed":22858,"ĠWemb":22859,"ranked":22860,"pike":22861,"ĠHogan":22862,"Ġu":22863,"Ġtunes":22864,"Ġincur":22865,"ĠNorthampton":22866,"Ġmound":22867,"Ġapprentices":22868,"ĠMonster":22869,"Ġredesigned":22870,"Ġshark":22871,"Ġrh":22872,"Ġfathers":22873,"ĠFors":22874,"ogne":22875,"uxe":22876,"Ġmercy":22877,"jani":22878,"Ġadditionally":22879,"Ġhunters":22880,"staff":22881,"Ġribbon":22882,"Ġcooked":22883,"opposed":22884,"ĠLivingston":22885,"ĠToby":22886,"osta":22887,"Ġvarsity":22888,"Ġtexture":22889,"Prince":22890,"inosaur":22891,"oween":22892,"Ġwherein":22893,"ennes":22894,"falls":22895,"ĠTruman":22896,"ajo":22897,"Ġspecialised":22898,"chaft":22899,"akan":22900,"ĠVes":22901,"imus":22902,"Dou":22903,"ibe":22904,"1940":22905,"Ġenjoys":22906,"ĠValle":22907,"ĠItalians":22908,"Ġleak":22909,"astrous":22910,"Ġdegradation":22911,"asco":22912,"Ġambulance":22913,"Ġscram":22914,"Ġpp":22915,"Ġsurge":22916,"Ġconcession":22917,"ĠDÃ¼":22918,"Ġemission":22919,"ĠNigel":22920,"Ġdecreasing":22921,"Ġgown":22922,"Ġprobable":22923,"Ġgradual":22924,"Ġbolt":22925,"ĠPok":22926,"ĠCron":22927,"Ġsupervisor":22928,"ĠSieg":22929,"ahon":22930,"Ġapprove":22931,"Ġtrout":22932,"Ġunav":22933,"ĠBurmese":22934,"ĠAristot":22935,"Ġneglig":22936,"Ġtuberculosis":22937,"ĠCypri":22938,"Ġaforementioned":22939,"Ġseize":22940,"Ġdiffering":22941,"Ġrespir":22942,"ĠWeiss":22943,"ĠJournalism":22944,"urgery":22945,"ĠCaucasus":22946,"ĠLeh":22947,"Ġcardiac":22948,"ĠBuddy":22949,"Ġundergone":22950,"Ġjumps":22951,"ĠCongressman":22952,"Ġpleas":22953,"ĠHitch":22954,"ĠContr":22955,"Ġbureaucr":22956,"esse":22957,"Ġearnings":22958,"Ïħ":22959,"Ġdisrupt":22960,"Ġawaken":22961,"ĠEisenhower":22962,"ollah":22963,"ĠAval":22964,"ĠBirds":22965,"Dream":22966,"Ġinactive":22967,"ĠIGN":22968,"Ġretrospective":22969,"ĠVolleyball":22970,"Ġdenominations":22971,"APTER":22972,"Ġpays":22973,"ieves":22974,"ĠMarty":22975,"Ġsnakes":22976,"Ġgigg":22977,"Ġfocal":22978,"Ġpunished":22979,"Ġjurisdictions":22980,"mount":22981,"urrection":22982,"olson":22983,"lio":22984,"Ġplayground":22985,"Ġcopied":22986,"ulls":22987,"Ġbred":22988,"Ġdun":22989,"ĠBeautiful":22990,"ĠVaughan":22991,"sty":22992,"Ġscholarships":22993,"ĠByrd":22994,"Ġsubscribers":22995,"conf":22996,"UA":22997,"iesel":22998,"Ġclassics":22999,"offic":23000,"ocratic":23001,"anus":23002,"ĠAtlÃ©tico":23003,"Ġharmon":23004,"Ġlitigation":23005,"Ġspecializes":23006,"Ġsurprisingly":23007,"ĠKes":23008,"FR":23009,"engers":23010,"Ġrevelation":23011,"Ġmeanwhile":23012,"ĠLich":23013,"ĠFowler":23014,"volume":23015,"Ġpercept":23016,"Ġreviewers":23017,"Ġcensorship":23018,"Ġnorthward":23019,"ĠfÃ¼r":23020,"cled":23021,"Ġfootsteps":23022,"Ġparap":23023,"ĠRim":23024,"lightenment":23025,"ĠNR":23026,"ĠKiel":23027,"ĠScript":23028,"ĠNetflix":23029,"texts":23030,"Mid":23031,"ĠCoy":23032,"ophyll":23033,"Ġpolym":23034,"Ġamen":23035,"ĠACC":23036,"underb":23037,"too":23038,"ĠHoliday":23039,"Ġvi":23040,"Ġapproximate":23041,"Ġsoftball":23042,"ĠMia":23043,"gets":23044,"Ġprotoc":23045,"Ġlogging":23046,"ĠOttomans":23047,"Ġrer":23048,"Ġgenius":23049,"Ġstandardized":23050,"ĠBurlington":23051,"Ġroofs":23052,"Ġinequality":23053,"Ġupwards":23054,"Pierre":23055,"ÅĦsk":23056,"mu":23057,"1920":23058,"Ġfixtures":23059,"ĠGibbs":23060,"ĠCongregation":23061,"qua":23062,"exper":23063,"ĠRider":23064,"Ġtelecommunications":23065,"Ġinterceptions":23066,"ĠDante":23067,"Ġinvestigators":23068,"ĠWii":23069,"system":23070,"Bob":23071,"ĠQuad":23072,"Ġextracted":23073,"Ġlowland":23074,"ĠDhaka":23075,"Ġoptimal":23076,"Ġoverthrow":23077,"Ġlandings":23078,"Ġexcavation":23079,"ĠPioneer":23080,"Ġoffset":23081,"Ġcamping":23082,"Ġcharm":23083,"ĠWheel":23084,"Ġdenounced":23085,"Ġheirs":23086,"Ġmonastic":23087,"Da":23088,"yi":23089,"ĠJudith":23090,"ruff":23091,"Ġaccordingly":23092,"faced":23093,"Ġalterations":23094,"Mor":23095,"Ġincarcer":23096,"Ġcheaper":23097,"Ġempower":23098,"ĠCM":23099,"Ġtrailing":23100,"Ġexchanges":23101,"string":23102,"Ġpreview":23103,"ĠGeological":23104,"ÙĪ":23105,"ribes":23106,"Ġangular":23107,"ĠBoxing":23108,"Ġpromotions":23109,"ĠZambia":23110,"Cons":23111,"ĠSerbs":23112,"Ġhereditary":23113,"Ġrebranded":23114,"BP":23115,"Ġcomposing":23116,"cultural":23117,"ĠJessie":23118,"Ġtones":23119,"ĠTotten":23120,"ĠBusch":23121,"Ġgrandparents":23122,"Ġratified":23123,"Ġexplosives":23124,"ĠTowards":23125,"Ġpresently":23126,"ĠGlory":23127,"ĠMartÃŃ":23128,"oult":23129,"LM":23130,"ĠTA":23131,"Ġsanctions":23132,"ĠKram":23133,"published":23134,"omorphic":23135,"ĠRotterdam":23136,"Ġbabies":23137,"ttemberg":23138,"ĠAdj":23139,"oval":23140,"ÄĹ":23141,"ĠHeroes":23142,"Ġcliffs":23143,"ĠAlgerian":23144,"ĠDmit":23145,"mega":23146,"Äĳ":23147,"ĠAmar":23148,"Ġsignatures":23149,"Ġnarrowed":23150,"Wel":23151,"Ġjokes":23152,"bear":23153,"ĠTreasurer":23154,"million":23155,"Ġwors":23156,"lv":23157,"Ġapprentice":23158,"1963":23159,"Ġdignity":23160,"ĠSek":23161,"Ġepidemic":23162,"ĠHaus":23163,"ĠConcern":23164,"ĠEgg":23165,"Ġmonasteries":23166,"loading":23167,"ĠGentle":23168,"Ġdiminished":23169,"Ġcables":23170,"Ġexecute":23171,"hael":23172,"Ġopener":23173,"Ġstunt":23174,"Ġsympathy":23175,"Ġrisen":23176,"Ġhailed":23177,"Ġgrateful":23178,"iping":23179,"ĠOrt":23180,"pectives":23181,"hatt":23182,"teacher":23183,"Ġchant":23184,"ĠMirror":23185,"Ġtertiary":23186,"Ġrockets":23187,"ĠPras":23188,"Î²":23189,"ĠOdd":23190,"ietal":23191,"Ġbir":23192,"âĢ²":23193,"Ġconclusions":23194,"ĠLagos":23195,"ĠJab":23196,"ĠBran":23197,"Ġtoes":23198,"Ak":23199,"usz":23200,"Ġexpans":23201,"Meg":23202,"pical":23203,"Ġcollaborations":23204,"graded":23205,"ĠPresidency":23206,"roscopy":23207,"Ġwolves":23208,"uffle":23209,"ibles":23210,"ĠTwins":23211,"ĠMozambique":23212,"Ġobjected":23213,"Ġmandated":23214,"Ġinvari":23215,"were":23216,"ĠHorace":23217,"alon":23218,"Ġarom":23219,"Ã¡z":23220,"Ġjuice":23221,"Ġdesperately":23222,"ĠCic":23223,"Ġparticipates":23224,"ĠPremiership":23225,"ĠBrowne":23226,"ĠNatalie":23227,"ĠOffensive":23228,"ĠRandall":23229,"ĠAppalach":23230,"olecular":23231,"Ġmotiv":23232,"ĠBills":23233,"ÉĻ":23234,"Ġpharmaceutical":23235,"leys":23236,"Ġmutation":23237,"weed":23238,"ĠWritten":23239,"Ġarchbishop":23240,"Ġadvertised":23241,"Ġunpop":23242,"ĠStad":23243,"Ġvowels":23244,"Ġforeigners":23245,"esch":23246,"ĠDE":23247,"Ġdiscoveries":23248,"Ġceramic":23249,"Ġinvite":23250,"ĠHawth":23251,"ĨĴ":23252,"ĠPlans":23253,"Ġcatast":23254,"ÃŃk":23255,"arency":23256,"ĠEly":23257,"Ġ1700":23258,"Ġdeported":23259,"onson":23260,"Ġbreeds":23261,"Ġobligation":23262,"Ġdeities":23263,"Ġtremendous":23264,"ĠMercer":23265,"inck":23266,"Ġmotifs":23267,"Ġraises":23268,"ĠÅĮ":23269,"Ġashore":23270,"ĠNab":23271,"ĠKuala":23272,"ĠWilts":23273,"between":23274,"Ġprinces":23275,"Ġdot":23276,"Ġawake":23277,"ĠWinners":23278,"ĠGÃ¼":23279,"raff":23280,"VS":23281,"Ġnightclub":23282,"Ġproductivity":23283,"fif":23284,"ĠLucia":23285,"ĠLincolnshire":23286,"Ġincarnation":23287,"ĠFlint":23288,"Ġmerging":23289,"Ïī":23290,"ouncing":23291,"Women":23292,"herical":23293,"marked":23294,"ĠDeer":23295,"tiles":23296,"Ġpavilion":23297,"ĠZurich":23298,"metre":23299,"Pa":23300,"Ġlever":23301,"Ġallocation":23302,"name":23303,"Ġwhale":23304,"akin":23305,"ools":23306,"ĠEpic":23307,"unched":23308,"Ġresistant":23309,"ethoven":23310,"ĠIntro":23311,"ĠYar":23312,"ĠAmelia":23313,"ĠGent":23314,"ĠRang":23315,"ĠWembley":23316,"ĠSpani":23317,"nar":23318,"Ġmurderer":23319,"Ġfungus":23320,"ĠEconomy":23321,"Ġcreativity":23322,"Ġphrases":23323,"ĠfaÃ§ade":23324,"Ġcocaine":23325,"Ġdanced":23326,"ĠDreams":23327,"ĠCombined":23328,"agus":23329,"ĠDaven":23330,"Ġrang":23331,"Ġstocks":23332,"commit":23333,"ĠArchive":23334,"Ġarrests":23335,"Ġmethodology":23336,"Ġmargins":23337,"Ġturbines":23338,"Ã¼rttemberg":23339,"ĠInst":23340,"Ġadmiral":23341,"ĠColombo":23342,"Ġabduct":23343,"odont":23344,"Ġheavyweight":23345,"Ġdrowned":23346,"Ġlumin":23347,"Ġnumerical":23348,"Ġforemost":23349,"ĠDalton":23350,"ayas":23351,"Ġ240":23352,"ĠKhor":23353,"ĠCasino":23354,"ĠMackenzie":23355,"ĠMai":23356,"many":23357,"ĠBant":23358,"Ġdisbel":23359,"Ġvalidity":23360,"Ġflute":23361,"ivalent":23362,"Ġdefendants":23363,"ĠRecordings":23364,"pler":23365,"Ġsemester":23366,"ĠWhich":23367,"ĠSuzuki":23368,"anse":23369,"Ġmeth":23370,"Ġdetailing":23371,"Ġtransgender":23372,"Ġmillennium":23373,"airn":23374,"Ġdisastrous":23375,"wi":23376,"Ġacre":23377,"croft":23378,"Ġmonopoly":23379,"Even":23380,"Ġpeasant":23381,"Ġcomparative":23382,"Ġtrol":23383,"Ġcrystals":23384,"ĠRenÃ©":23385,"ĠWords":23386,"ĠMonk":23387,"Âł.":23388,"Ġpropeller":23389,"Ġgrazing":23390,"ĠKilkenny":23391,"Fire":23392,"oler":23393,"Ġdenomination":23394,"ĠLus":23395,"Ġornament":23396,"olini":23397,"gestion":23398,"esome":23399,"kefeller":23400,"ĠZhao":23401,"eva":23402,"ĠSamantha":23403,"Ġsatirical":23404,"tape":23405,"ĠOF":23406,"oslav":23407,"Ġdeputies":23408,"alai":23409,"Ġrails":23410,"Ġdisciples":23411,"Ġeternal":23412,"Ġreciproc":23413,"ĠChow":23414,"ĠNagar":23415,"Ġopenings":23416,"ulatory":23417,"ĠLob":23418,"Ġbrushed":23419,"Ġcrossover":23420,"ĠHudd":23421,"Ġconfiscated":23422,"Ġrowing":23423,"ĠHoffman":23424,"ĠNickel":23425,"Ġcruisers":23426,"yang":23427,"Ġnewest":23428,"ĠMonmouth":23429,"Ġcaste":23430,"ĠEsk":23431,"hit":23432,"Ġtaxation":23433,"Ã¢lÃ¢":23434,"Ġconsultation":23435,"Ġlasts":23436,"ĠConway":23437,"oway":23438,"ĠAnch":23439,"Ġplanting":23440,"nh":23441,"ĠStream":23442,"eredith":23443,"Ġcostly":23444,"ĠCapt":23445,"Ġrestoring":23446,"itsu":23447,"Ġillusion":23448,"Ġblonde":23449,"University":23450,"Ġairplane":23451,"Mag":23452,"Ġsquares":23453,"ĠWeap":23454,"ĠZÃ¼rich":23455,"ĠHipp":23456,"Ġinherent":23457,"ppen":23458,"Wil":23459,"Vir":23460,"Ġrenewal":23461,"1000":23462,"ergies":23463,"vich":23464,"Ġlan":23465,"ĠCaval":23466,"ĠLump":23467,"Ġthreatens":23468,"Ġvirgin":23469,"ĠSta":23470,"ftw":23471,"ĠDirectorate":23472,"Ġsauce":23473,"icho":23474,"ĠTalbot":23475,"pret":23476,"Ġdictionary":23477,"ĠQuick":23478,"sz":23479,"Ġevaluate":23480,"hea":23481,"ĠLiang":23482,"Din":23483,"inement":23484,"Ġvocational":23485,"ĠTram":23486,"Ġestablishments":23487,"Ġspends":23488,"Ġmarkers":23489,"opsis":23490,"ĠDemon":23491,"ĠOaks":23492,"Ġabdomen":23493,"Lord":23494,"2019":23495,"ĠKaiser":23496,"Ġwinger":23497,"Ġsubgroup":23498,"1962":23499,"dog":23500,"colored":23501,"Ġsurely":23502,"ĠWash":23503,"ugly":23504,"Sunday":23505,"ĠHilton":23506,"ĠAurora":23507,"Ġspecialists":23508,"Ġanticipation":23509,"Ġbug":23510,"ĠAssess":23511,"Ġmeanings":23512,"ĠShot":23513,"Ê»":23514,"ĠGear":23515,"Ġ122":23516,"Ġmethyl":23517,"ĠXIII":23518,"Ġobli":23519,";\"":23520,"Ġmyst":23521,"Ġarmament":23522,"zong":23523,"pole":23524,"ĠAve":23525,"Ġleaked":23526,"due":23527,"Ġinduction":23528,"ĠHick":23529,"Ġinstitutes":23530,"ĠWakefield":23531,"ĠQuality":23532,"Ġapology":23533,"Ġdams":23534,"Ġbasket":23535,"ĠSok":23536,"ĠRÃ©":23537,"aunch":23538,"ĠLup":23539,"ĠNassau":23540,"Ġomitted":23541,"VB":23542,"Ġcope":23543,"Ġmoisture":23544,"List":23545,"ĠDeport":23546,"ĠArchaeological":23547,"Ġdramat":23548,"ĠMish":23549,"enery":23550,"Ġseventeenth":23551,"Ġfinances":23552,"Ġparameter":23553,"user":23554,"ĠWitt":23555,"Ġcolloqu":23556,"ĠTip":23557,"Ġmuttered":23558,"ĠRajasthan":23559,"ĠVera":23560,"indy":23561,"Ġsurfaced":23562,"Ġenvision":23563,"Ġrolls":23564,"ĠTaliban":23565,"Ġsuppression":23566,"Ġexcluding":23567,"Ġdwellings":23568,"Ġchaplain":23569,"izarre":23570,"Ġdiscs":23571,"ĠBarrow":23572,"ĠSega":23573,"Disc":23574,"Free":23575,"ĠPaz":23576,"ĠCromwell":23577,"Ġbiographer":23578,"Franc":23579,"ĠCars":23580,"Ġ1791":23581,"Ġgasped":23582,"educational":23583,"ĠCHAPTER":23584,"Ġpyramid":23585,"Only":23586,"agraph":23587,"Ġclashes":23588,"Ġclips":23589,"Ġads":23590,"ĠMali":23591,"Ġabsorption":23592,"acious":23593,"Ġsplitting":23594,"jective":23595,"Ġdeserted":23596,"Ġcongregations":23597,"Ġunopposed":23598,"holding":23599,"Ġannounce":23600,"Ġneglected":23601,"Ġmonumental":23602,"ĠBohemia":23603,"Ġcolorful":23604,"Ġalcoholic":23605,"Ġtreasurer":23606,"Ġcyber":23607,"Ġconception":23608,"Ġanalyses":23609,"ĠBorneo":23610,"ĠPavilion":23611,"Ġbunch":23612,"Ġrematch":23613,"ĠTulsa":23614,"atti":23615,"ĠFrankie":23616,"esto":23617,"ilin":23618,"ĠBiblical":23619,"Ġstrat":23620,"Ġfigur":23621,"ĠCDs":23622,"Ġflavor":23623,"ĠKip":23624,"Ġchemist":23625,"ĠPleasant":23626,"\"<":23627,"Ġkillings":23628,"ĠBeer":23629,"ĠMBA":23630,"ĠSlovenian":23631,"Ġinsane":23632,"itimate":23633,"ĠLester":23634,"Ġsimplified":23635,"Ġrelieve":23636,"estown":23637,"Ġreplay":23638,"ĠGuest":23639,"otica":23640,"Ġclad":23641,"uti":23642,"Ġstain":23643,"rology":23644,"Ġdismantled":23645,"ĠUb":23646,"ĠStam":23647,"ĠDillon":23648,"ifiable":23649,"ĠAfro":23650,"hetics":23651,"ĠJade":23652,"ogenesis":23653,"Ġillustration":23654,"Ġsar":23655,"eport":23656,"Ġreadings":23657,"ĠAntoine":23658,"Ġnamesake":23659,"Ġdoubts":23660,"ĠConsort":23661,"Ġsuperst":23662,"Ġintegrate":23663,"))":23664,"Ġswear":23665,"ĠReformation":23666,"ĠIrvine":23667,"ĠJed":23668,"ĠRockefeller":23669,"Ġstrengthening":23670,"Ġcompassion":23671,"Ash":23672,"esis":23673,"Ġcharities":23674,"ĠResistance":23675,"ĠHoy":23676,"Ġairlines":23677,"Ġurge":23678,"1961":23679,"inely":23680,"ĠAlpine":23681,"ĠÃĩ":23682,"Ġheels":23683,"Ġcentred":23684,"ĠNiagara":23685,"Ġbubble":23686,"Ġ1775":23687,"ĠHereford":23688,"ukh":23689,"Ġtapes":23690,"ĠRestaur":23691,"CI":23692,"Ġ117":23693,"1939":23694,"Jul":23695,"Ġdynam":23696,"Aut":23697,"Ġlamps":23698,"Ġincorporation":23699,"eworthy":23700,"ĠRocks":23701,"ithm":23702,"ĠShiv":23703,"Ġtutor":23704,"Ġeastward":23705,"Ġpsychologist":23706,"Ġunused":23707,"Ġnerves":23708,"Ġpoles":23709,"Ġfibers":23710,"Ġclans":23711,"standard":23712,"Ġsilently":23713,"ĠMillennium":23714,"ĠExtra":23715,"Ġbeans":23716,"ĠSpy":23717,"Ġstyled":23718,"ĠLikewise":23719,"Ġconstellation":23720,"Ġvariously":23721,"Ġaffordable":23722,"ĠJourney":23723,"Ġrecalls":23724,"ĠBoone":23725,"ĠNK":23726,"ĠPurple":23727,"nell":23728,"ĠIdent":23729,"Ġkidnapping":23730,"ĠPD":23731,"ĠNue":23732,"ĠAls":23733,"oxide":23734,"Spe":23735,"elman":23736,"Ġdistributor":23737,"ĠInvestigation":23738,"onut":23739,"oris":23740,"Ġcler":23741,"course":23742,"ĠCircus":23743,"ĠPublications":23744,"ĠRide":23745,"ĠTerrace":23746,"?\",":23747,"More":23748,"Kar":23749,"ĠCanadians":23750,"ĠProvision":23751,"ftwaffe":23752,"ĠKah":23753,".*":23754,"Ġdissent":23755,"ĠBenny":23756,"Âłin":23757,"riesthood":23758,"ĠSalam":23759,"ĠPlatform":23760,"Ġdenotes":23761,"Ġparl":23762,"Ġstrap":23763,"Ġdiscourse":23764,"Ġscenic":23765,"ĠRevenue":23766,"ĠSustain":23767,"ĠKirby":23768,"Ġepithet":23769,"Ġsubstituted":23770,"jana":23771,"mine":23772,"Ġsulfur":23773,"Ġtires":23774,"iland":23775,"ĠFreud":23776,"Charl":23777,"Ġcigarette":23778,"Most":23779,"Ġlyrical":23780,"Î¯":23781,"Daniel":23782,"ĠConcer":23783,"Ġsack":23784,"ĠAcad":23785,"Bus":23786,"otics":23787,"Ġcirculated":23788,"Ġbored":23789,"ĠMohamed":23790,"Ġoverlap":23791,"lifting":23792,"Ger":23793,"Ġintentionally":23794,"Ġmans":23795,"ĠJude":23796,"Ġbilingual":23797,"ĠWolfe":23798,"Imp":23799,"ĠYong":23800,"Ġbotanist":23801,"Ġbehavioral":23802,"ilight":23803,"aleigh":23804,"Ġnationality":23805,"ĠVine":23806,"service":23807,"Ġquote":23808,"ĠBlind":23809,"ĠStephanie":23810,"Ġintellectuals":23811,"emann":23812,"Ã³r":23813,"oder":23814,"ĠBruins":23815,"ĠCrim":23816,"organized":23817,"ĠGranada":23818,"Ġbetrayed":23819,"Ġbalcony":23820,"Ġdefinitive":23821,"ĠBullet":23822,"uben":23823,"Ġdigest":23824,"Ġmerchandise":23825,"ĠVig":23826,"Ġignoring":23827,"Ġrender":23828,"Ġforgive":23829,"hak":23830,"nation":23831,"ĠAxis":23832,"ĠSandra":23833,"Ġcoincided":23834,"Ġprinter":23835,"ĠAin":23836,"Ġgenealog":23837,"ĠSpot":23838,"Ġprohibition":23839,"ĠVersion":23840,"Pet":23841,"ĠSigma":23842,"ourier":23843,"Ġoch":23844,"ĠClifton":23845,"ĠScholarship":23846,"oza":23847,"Ġonward":23848,"Ġavant":23849,"sequent":23850,"ĠNathaniel":23851,"Ġvivid":23852,"Ġmammal":23853,"ĠMughal":23854,"Ġtreaties":23855,"ĠBaxter":23856,"eburg":23857,"ĠImpact":23858,"Cla":23859,"Ġ175":23860,"Ġinflux":23861,"ĠAudio":23862,"Ġstub":23863,"lower":23864,"Ġproving":23865,"ĠTraditionally":23866,")<":23867,"ĠÅģÃ³d":23868,"ING":23869,"ĠAyr":23870,"ĠNah":23871,"ĠMarxist":23872,"Ġhappily":23873,"ĠNamed":23874,"Ġpirate":23875,"Ġguerrilla":23876,"Gen":23877,"aan":23878,"Ġmisunder":23879,"Ġlikelihood":23880,"Ġhomestead":23881,"Ġhint":23882,"Ġcaring":23883,"Ġundisclosed":23884,"fur":23885,"ĠEck":23886,"Ġinspector":23887,"Ġcustomary":23888,"filled":23889,"ĠDex":23890,"Ġ00":23891,"ĠMyr":23892,"ĠAutumn":23893,"ĠPepper":23894,"olulu":23895,"adors":23896,"Ġcommenting":23897,"Ġliquor":23898,"ĠMarquis":23899,"icacy":23900,"ĠQuÃ©":23901,"Ġshelf":23902,"erget":23903,"Ġpockets":23904,"Ġairborne":23905,"Ġneeding":23906,"ĠLives":23907,"Ġclimax":23908,"ĠRear":23909,"ĠInteractive":23910,"Âł3":23911,"Ġborne":23912,"Ġverbs":23913,"Ġprolifer":23914,"Ġnutrition":23915,"uble":23916,"ĠSavoy":23917,"Ġfiling":23918,"Ġrealism":23919,"ĠNorthumberland":23920,"ĠAvery":23921,"ĠParticip":23922,"bage":23923,"Ġsubset":23924,"Ġwerew":23925,"ĠTier":23926,"Ġbestowed":23927,"Ġsounding":23928,"ĠXi":23929,"ĠRainbow":23930,"ĠEighth":23931,"ĠTet":23932,"ĠNell":23933,"omac":23934,"ĠErin":23935,"ĠSettlement":23936,"ĠRicardo":23937,"ĠStaffordshire":23938,"Ġpronunciation":23939,"Ġelevations":23940,"Ġcontributors":23941,"Ġbuilds":23942,"Ġprobe":23943,"ĠNetworks":23944,"Ġsupportive":23945,"Ġeducate":23946,"ĠTale":23947,"hetto":23948,"Ġflipped":23949,"ĠThereafter":23950,"Ġoutward":23951,"ĠElections":23952,"ĠFactor":23953,"Ġbrave":23954,"kie":23955,"Ġpept":23956,"Master":23957,"Hi":23958,"sley":23959,"eason":23960,"ansom":23961,"Ġlenses":23962,"Ġsob":23963,"Ġconfession":23964,"ulg":23965,"ĠSabb":23966,"Ġunfinished":23967,"Ġindirectly":23968,"ĠGao":23969,"Ġalk":23970,"COM":23971,"ĠDil":23972,"Ġtemporal":23973,"Ġcorrelation":23974,"Ġsegregation":23975,"adys":23976,"Ġsuggestions":23977,"ĠBlackpool":23978,"Ġdesirable":23979,"Ġcompelled":23980,"Ġperiodic":23981,"Ġexceeding":23982,"hawks":23983,"Ġspill":23984,"Ġintric":23985,"Ġarchaeology":23986,"ĠSchneider":23987,"ĠResident":23988,"ĠBordeaux":23989,"ĠManufacturing":23990,"tech":23991,"Ġsenators":23992,"ĠWilderness":23993,"incy":23994,"ĠObserver":23995,"Ġpicnic":23996,"Ġeighty":23997,"Ġbesieged":23998,"ĠRyder":23999,"Ġinauguration":24000,"ĠBhag":24001,"Ġcommitting":24002,"Americans":24003,"Canada":24004,"ĠCouncill":24005,"ĠSmithsonian":24006,"ĠLaurel":24007,"Ġtiger":24008,"gia":24009,"Ġhelpful":24010,"arling":24011,"Ġpostgraduate":24012,"Ġloads":24013,"minent":24014,"ĠPaula":24015,"Ġfranc":24016,"ĠSenegal":24017,"Ġmanned":24018,"ĠMcCl":24019,"patrick":24020,"asim":24021,"grav":24022,"Ġclue":24023,"ĠBound":24024,"ĠXIV":24025,"hama":24026,"ĠTheology":24027,"ĠTusc":24028,"uela":24029,"idelberg":24030,"ĠMeredith":24031,"ĠPune":24032,"Ġdecreases":24033,"ĠBeethoven":24034,"telling":24035,"Ġdeparting":24036,"ĠÅģÃ³dÅº":24037,"ĠFew":24038,"Ġshelters":24039,"Ġheroic":24040,"Ġcanopy":24041,"ĠPersia":24042,"ĠVari":24043,"KS":24044,"ĠWise":24045,"Ġshear":24046,"Ġhistories":24047,"ovsk":24048,"ĠHiggins":24049,"Ġflatten":24050,"Class":24051,"ĠCommissioners":24052,"Ġecology":24053,"Ġfusc":24054,"Ġphylogen":24055,"gars":24056,"itations":24057,"Ġhij":24058,"ĠAfricans":24059,"ijk":24060,"ĠRoyals":24061,"ĠiOS":24062,"ĠTad":24063,"ĠNHS":24064,"ĠYun":24065,"Ġcircus":24066,"idas":24067,"ĠVocal":24068,"ĠSug":24069,"roscopic":24070,"Ã¶l":24071,"Ġconvenience":24072,"Ġpeculiar":24073,"ĠByrne":24074,"ĠLlan":24075,"Ġmilitants":24076,"EEE":24077,"Ġduke":24078,"Ġspiders":24079,"ĠNorris":24080,"fo":24081,"ĠDartmouth":24082,"Ġdissatisf":24083,"Ġechoed":24084,"Ġsoprano":24085,"Ġmaturity":24086,"Ġdeton":24087,"osaur":24088,"ĠMadame":24089,"Ġvass":24090,"ĠZimmer":24091,"Ġsupplying":24092,"ĠJaw":24093,"Ġgaz":24094,"ĠLoy":24095,"ĠEA":24096,"Stop":24097,"ĠRedskins":24098,"ĠBhutan":24099,"race":24100,"ĠPractice":24101,"Ð¾Ð²":24102,"LT":24103,"ĠGabri":24104,"taker":24105,"ĠTribunal":24106,"Ġbarrels":24107,"Ġlogistics":24108,"gard":24109,"lag":24110,"ĠNZ":24111,"Ġradial":24112,"ĠNim":24113,"orno":24114,"ricting":24115,"Ġdisl":24116,"Ġneighbours":24117,"Ġweekday":24118,"Ġaccomplishments":24119,"ĠChung":24120,"ĠHorizon":24121,"ĠHT":24122,"Ġsurvivor":24123,"Ġsuffers":24124,"ĠWildcats":24125,"ĠDial":24126,"estrian":24127,"Ġsnout":24128,"Raw":24129,"Ġobey":24130,"bee":24131,"bol":24132,"liner":24133,"ĠMacau":24134,"Ġflexibility":24135,"Ġpoisoning":24136,"Ġrelinqu":24137,"Ġhurling":24138,"ĠZap":24139,"Ġharmful":24140,"ĠLotus":24141,"Ġbranding":24142,"ĠPhel":24143,"Ġexercised":24144,"Ġwhitish":24145,"ĠDomingo":24146,"Ġpunt":24147,"ĠWarrior":24148,"Gre":24149,"Ġlied":24150,"ĠProducts":24151,"ĠHuntington":24152,"Ms":24153,"Ġchased":24154,"Ġconstitutes":24155,"Ġtablet":24156,"ĠTerritories":24157,"Ġconcealed":24158,"ĠPlatinum":24159,"cus":24160,"ĠTipper":24161,"ĠWhether":24162,"ĠTobago":24163,"utsch":24164,"ruz":24165,"Ġflourished":24166,"ĠYus":24167,"Ġinsists":24168,"ptions":24169,"Ġhardcore":24170,"Ġutilizing":24171,"Ġfolding":24172,"ĠHector":24173,"Ġrobots":24174,"Ġdriv":24175,"Ġtimeline":24176,"Ġbureau":24177,"ĠWo":24178,"Ġenerget":24179,"Ġplatoon":24180,"ĠCretaceous":24181,"ĠIch":24182,"ĠRach":24183,"Ġrestriction":24184,"ĠEncycl":24185,"Ġconcurrent":24186,"Ġproprietary":24187,"ĠHanna":24188,"emaker":24189,"anners":24190,"ĠReyes":24191,"egu":24192,"Ġimmunity":24193,"Ġhostilities":24194,"yar":24195,"sens":24196,"secondary":24197,"ĠHussein":24198,"Ġamendments":24199,"ogeneous":24200,"ĠWent":24201,"Ġveto":24202,"Ġflats":24203,"Ġcrus":24204,"Ġdigging":24205,"ĠSiberia":24206,"ĠMadh":24207,"Ġvisibility":24208,"itone":24209,"fits":24210,"Ġlex":24211,"ĠFlynn":24212,"Ġpolo":24213,"ĠHindus":24214,"Ġtorque":24215,"Ġaccession":24216,"ĠEverett":24217,"ĠMarvin":24218,"Ġnests":24219,"ĠPup":24220,"osynt":24221,"ĠSalon":24222,"directed":24223,"ĠAnimation":24224,"Van":24225,"Ġportrays":24226,"ĠHarding":24227,"Ġyielded":24228,"rans":24229,"small":24230,"Ġsailor":24231,"ĠText":24232,"Ġrespiratory":24233,"Coll":24234,"ĠMoroccan":24235,"Ġgrasp":24236,"ĠPhantom":24237,"Tim":24238,"ĠBremen":24239,"ĠCopper":24240,"Ġjustify":24241,"ĠEvents":24242,"odynamic":24243,"ĠAlec":24244,"rath":24245,"ventional":24246,"Ġproves":24247,"ĠParalympic":24248,"ignon":24249,"ĠPermanent":24250,"owice":24251,"ĠShould":24252,"Ġmarijuana":24253,"ĠHesse":24254,"Ġinterfere":24255,"Ġsway":24256,"assium":24257,"Ġoverturned":24258,"Soviet":24259,"ĠNolan":24260,"Ġconject":24261,"Ġunpopular":24262,"unate":24263,"ĠImag":24264,"ĠMilo":24265,"ĠLevy":24266,"Ġfulfilled":24267,"idine":24268,"350":24269,"Ġbarred":24270,"Ġcousins":24271,"uzzle":24272,"ĠWiltshire":24273,"Ġengineered":24274,"Ġderivatives":24275,"ĠIsmail":24276,"CAF":24277,"Ġflanked":24278,"wagen":24279,"Ġadorn":24280,"Ġreassigned":24281,"ĠEdmond":24282,"ĠKemp":24283,"Ġclash":24284,"ĠTimber":24285,"ĠBrandenburg":24286,"ropic":24287,"Ġridges":24288,"Ġsabot":24289,"ĠDiploma":24290,"Ġarous":24291,"ĠSN":24292,"ollen":24293,"ĠEnterprises":24294,"Ġgramm":24295,"Ġentrusted":24296,"Ġtattoo":24297,"ĠUSD":24298,"ĠLum":24299,"ĠAbby":24300,"ĠMedina":24301,"ĠRodney":24302,"ĠHuff":24303,"aa":24304,"Ġbroker":24305,"Ġtore":24306,"urate":24307,"Ġwarnings":24308,"ĠPersonal":24309,"ilde":24310,"ĠGovernors":24311,"Ġadvancement":24312,"ĠPreservation":24313,"1958":24314,"ĠBrennan":24315,"ipes":24316,"gue":24317,"Ġguild":24318,"Ġdisgust":24319,"Ġanybody":24320,"Ġredund":24321,"ĠSaul":24322,"Ġworkplace":24323,"Ġswitches":24324,"Ġintensified":24325,"ĠTribe":24326,"ĠCobb":24327,"public":24328,"ĠTus":24329,"Ġattracts":24330,"ĠIB":24331,"ĠHobart":24332,"Ġrefriger":24333,"omotive":24334,"ĠBP":24335,"Ġcane":24336,"Ġvocabulary":24337,"Ġmoderately":24338,"Ġimportantly":24339,"Ġrecognizing":24340,"ĠAlph":24341,"Ġcompartment":24342,"ĠGods":24343,"Ġspawned":24344,"Mu":24345,"ĠLamp":24346,"Ġguardian":24347,"ĠBaku":24348,"Ġstrained":24349,"Ġslated":24350,"Ġomn":24351,"Ġgroom":24352,"Ġcassette":24353,"Ġreinstated":24354,"etor":24355,"Sar":24356,"Harry":24357,"Ġsoup":24358,"Ġaggression":24359,"Ġillegally":24360,"ĠPig":24361,"trick":24362,"ĠRiding":24363,"enched":24364,"Ġimports":24365,"ighton":24366,"ogie":24367,"Ġquotes":24368,"Ġeyebrows":24369,"Ġ(âĢľ":24370,"ĠMcInt":24371,"ĠGwyn":24372,"inton":24373,"ĠUrdu":24374,"isal":24375,"Ġfavourable":24376,"enthal":24377,"rude":24378,"ebu":24379,"Ġterrorists":24380,"Ġappend":24381,"ĠFortune":24382,"ĠMcMahon":24383,"Ġcites":24384,"Ġinevitable":24385,"obiles":24386,"ĠÂł":24387,"Ġfriction":24388,"Ġuniqu":24389,"ĠDepending":24390,"Form":24391,"ĠSonny":24392,"endra":24393,"Ġskirm":24394,"Ġmould":24395,"ĠWorkshop":24396,"ĠAnita":24397,"alford":24398,"Ġdepressed":24399,"ossa":24400,"Ka":24401,"inka":24402,"Ġzool":24403,"1957":24404,"Ġtherape":24405,"Jim":24406,"Ġeminent":24407,"ĠAirborne":24408,"ĠTomorrow":24409,"India":24410,"ĠViktor":24411,"ĠMaking":24412,"ĠKass":24413,"Tri":24414,"yth":24415,"ĠRupert":24416,"ĠMoldova":24417,"ĠHubb":24418,"Ġnotor":24419,"elig":24420,"geois":24421,"inches":24422,"Ġneedle":24423,"Ġpetals":24424,"ĠLaurence":24425,"ĠBuzz":24426,"ĠOval":24427,"auss":24428,"Ġfishermen":24429,"ĠWon":24430,"oulos":24431,"ĠMedieval":24432,"à²":24433,"Ġought":24434,"Ġbrowser":24435,"Ġideological":24436,"Ġtidal":24437,"Ġencycl":24438,"osc":24439,"ÑĮ":24440,"ĠRig":24441,"kmen":24442,"dependent":24443,"ĠFeng":24444,"Ġgrenade":24445,"Ġdescending":24446,"ĠMcCartney":24447,"Ġrecognise":24448,"Ġnorms":24449,"Ġhumour":24450,"ĠLawson":24451,"Ġviolinist":24452,"ĠRacecourse":24453,"ĠMaw":24454,"Ġbusinessmen":24455,"Ġpanc":24456,"Ġconsulted":24457,"ooted":24458,"Ġbacterial":24459,"ĠDir":24460,"Ġairplay":24461,";\"|":24462,"ĠTsar":24463,"ĠOswald":24464,"Kal":24465,"ĠCarrie":24466,"Ġkisses":24467,"ĠBlo":24468,"accept":24469,"Ġrouting":24470,"Ġpolyg":24471,"ĠFasc":24472,"Ġgenocide":24473,"ooner":24474,"Ġdigitally":24475,"Ġshotgun":24476,"unner":24477,"ĠLifetime":24478,"Ãµ":24479,"Ġpayload":24480,"ĠSwimming":24481,"ĠJamaican":24482,"Ġstronghold":24483,"ĠKost":24484,"iating":24485,"Ret":24486,"Ġmi":24487,"ĠRFC":24488,"Ra":24489,"ĠBee":24490,"iele":24491,"Ġchromosome":24492,"pill":24493,"ĠSoutheastern":24494,"ĠWide":24495,"fulness":24496,"ĠTottenham":24497,"Ġreorganization":24498,"reviewed":24499,"isors":24500,"Ġresurrect":24501,"Ġcastles":24502,"Ġarguably":24503,"Ġcontexts":24504,"stri":24505,"Ġsimpler":24506,"ĠKyoto":24507,"Ġadvers":24508,"tole":24509,"Ġoutc":24510,"aghan":24511,"ĠChatt":24512,"Ġblu":24513,"Ġeligibility":24514,"Ġashes":24515,"Ġrequesting":24516,"Ġlabelled":24517,"NZ":24518,"Fran":24519,"ĠShock":24520,"Ġdiscrete":24521,"Ġfloat":24522,"beaten":24523,"cards":24524,"Ð¼":24525,"FT":24526,"Ġsticks":24527,"ĠSubsequent":24528,"Ġfreezing":24529,"Ġconfessed":24530,"Ġpagan":24531,"Ġpotent":24532,"ĠCooke":24533,"ĠApache":24534,"ismatic":24535,"Ġconvinces":24536,"Ġreputed":24537,"ĠGeographic":24538,"Ġcylind":24539,"big":24540,"ĠSatan":24541,"Ġsetup":24542,"Ġglacier":24543,"Ġrelics":24544,"ollar":24545,"Ġmounting":24546,"Ġinvestigative":24547,"Ġplea":24548,"ĠSprint":24549,"ĠMcGill":24550,"hythms":24551,"Ġdividing":24552,"Ġseaw":24553,"ĠRomance":24554,"blo":24555,"Ġcalculations":24556,"phants":24557,"Ġcrem":24558,"Ġberth":24559,"Su":24560,"ĠWak":24561,"ĠBoliv":24562,"ĠFarmer":24563,"ĠPorsche":24564,"Scott":24565,"ĠEinstein":24566,"Ġost":24567,"ivist":24568,"Ġaide":24569,"ĠLowell":24570,"ĠCustoms":24571,"ĠBaj":24572,"zzo":24573,"ĠEverton":24574,"ĠCrane":24575,"Ġdrilling":24576,"Ġ123":24577,"Martin":24578,"Ġpathways":24579,"Ġsweeping":24580,"Ġfork":24581,"andr":24582,"ĠDM":24583,"doctor":24584,"olphin":24585,"Ġengraved":24586,"bull":24587,"ĠHare":24588,"Greek":24589,"Ġweighing":24590,"ĠNearly":24591,"Ġyellowish":24592,"Ġtombs":24593,"Golden":24594,"ĠSina":24595,"Ġbrigades":24596,"ĠDoes":24597,"Ġiv":24598,"ĠMcF":24599,"Ġkits":24600,"ocating":24601,"ĠStrange":24602,"ĠAlison":24603,"oldt":24604,"income":24605,"ĠElla":24606,"Ġpneumonia":24607,"á¿":24608,"ĠWis":24609,"ĠVolunteers":24610,"Ġwashing":24611,"gem":24612,"Ġdeter":24613,"Dragon":24614,"Ġbaptism":24615,"raphy":24616,"Ġthee":24617,"blue":24618,"ĠDut":24619,"ĠHasan":24620,"trak":24621,"ĠRobbie":24622,"Ġcomputational":24623,"ĠImage":24624,"Ġcommitments":24625,"ĠLorraine":24626,"Ġ501":24627,"Ġdeeds":24628,"ĠSaunders":24629,"Ġwetlands":24630,"amel":24631,"Ġbees":24632,"Ġtroupe":24633,"Ġderive":24634,"Lady":24635,"ailles":24636,"ĠDing":24637,"Ġeruption":24638,"ĠVHS":24639,"Vs":24640,"sol":24641,"Ġscroll":24642,"strÃ¶m":24643,"Ġvern":24644,"opotam":24645,"Dun":24646,"Ġabsorb":24647,"Ġpause":24648,"ĠNeal":24649,"Ġtouches":24650,"ĠBalkan":24651,"tenham":24652,"Ġacceleration":24653,"Ġcampaigning":24654,"Ġdiscount":24655,"ĠCum":24656,"ĠSculpt":24657,"Ġzinc":24658,"Ġsuccessors":24659,"ĠSomali":24660,"onductor":24661,"ĠZeus":24662,"ĠOlivier":24663,"ĠWolfgang":24664,"Ġinnocence":24665,"ippers":24666,"ĠUrs":24667,"ĠDistricts":24668,"ĠDolphins":24669,"ĠSchles":24670,"Âłmg":24671,"ĠHonolulu":24672,"ayev":24673,"Ġ1783":24674,"ĠClive":24675,"aline":24676,"Ġforgot":24677,"Ġpurchases":24678,"Ġaffiliates":24679,"Ġpriesthood":24680,"ĠEuc":24681,"Ġcollaborator":24682,"ĠMÃ¼n":24683,"ĠGad":24684,"asta":24685,"ricular":24686,"Ġvalves":24687,"Ġmultiplayer":24688,"ĠRusso":24689,"Ġpepper":24690,"leader":24691,"Ġstam":24692,"Ġsuprem":24693,"itudinal":24694,"illem":24695,"ĠCassie":24696,"Ġnull":24697,"Ġkeeper":24698,"ĠBella":24699,"Ġacquitted":24700,"Ã¡nchez":24701,"Ġdeposed":24702,"ĠEcho":24703,"ĠPrec":24704,"Ġintermitt":24705,"ĠLucky":24706,"Ġsecurities":24707,"starred":24708,"Ġagreeing":24709,"Bu":24710,"ĠCun":24711,"ĠAlto":24712,"oby":24713,"Hell":24714,"Ġpinned":24715,"ĠJh":24716,"Ġreviewing":24717,"1956":24718,"ĠTristan":24719,"Ġaccessories":24720,"Ġuseless":24721,"Ġconceded":24722,"Ġalternatives":24723,"Ġconditioning":24724,"ĠTup":24725,"ĠTomb":24726,"ĠDome":24727,"Ġincon":24728,"Ġprestige":24729,"Ġvegetable":24730,"Ġwinding":24731,"Ġdeliberate":24732,"ulo":24733,"ĠOsborne":24734,"faq":24735,"tre":24736,"Phone":24737,"ĠAnimals":24738,"Ġhorrible":24739,"ĠSaraj":24740,"Ġconcurrently":24741,"1959":24742,"ĠIntermediate":24743,"ĠSchwartz":24744,"Ġracist":24745,"utter":24746,"ĠÎ²":24747,"ĠMystery":24748,"ĠNichols":24749,"Ġprotector":24750,"anol":24751,"aduct":24752,"ĠMartinez":24753,"ĠConsumer":24754,"Ġimpose":24755,"Ġtransplant":24756,"Ġponds":24757,"Ġlaure":24758,"Ġseaf":24759,"ĠFlowers":24760,"ronym":24761,"Ġseeded":24762,"Ġmating":24763,"ĠJared":24764,"Ġdrifted":24765,"gyz":24766,"Ġwhist":24767,"ĠWait":24768,"Spec":24769,"ĠAu":24770,"chedelic":24771,"Univers":24772,"director":24773,"ĠTipperary":24774,"Ġneat":24775,"Ġ121":24776,"Ġbiom":24777,"ĠMines":24778,"rico":24779,"onomy":24780,"Ġcombustion":24781,"ĠCumm":24782,"ĠSomeone":24783,"ĠJacqu":24784,"Ġcommemorated":24785,"Ġattested":24786,"fair":24787,"adin":24788,"ĠRiga":24789,"ĠWere":24790,"Ġcontainers":24791,"cool":24792,"ĠSword":24793,"grims":24794,"Wal":24795,"Ġresent":24796,"Ġmeaningful":24797,"Ġsoloist":24798,"Ġskirt":24799,"ĠPaw":24800,"ĠChatham":24801,"Ġknights":24802,"Ġsupplier":24803,"ĠBudget":24804,"ĠEmeritus":24805,"ificates":24806,"idium":24807,"Ġinclined":24808,"Ġpolynomial":24809,"Ġsymph":24810,"Ġchop":24811,"Columb":24812,"ĠPey":24813,"tender":24814,"Ġaffinity":24815,"UD":24816,"ĠLenin":24817,"Ġrestructuring":24818,"ĠStart":24819,"Ġperce":24820,"ilyn":24821,"Ġprefect":24822,"ĠAdvert":24823,"ĠTalent":24824,"Ġnarrated":24825,"ĠWilmington":24826,"Ġmitochond":24827,"ĠNes":24828,"Ġrevive":24829,"Ġtrumpet":24830,"garde":24831,"ĠAndes":24832,"Ġraped":24833,"Ġventures":24834,"Ġtorpedoes":24835,"ĠBienn":24836,"ĠScandinavian":24837,"ĠDell":24838,"umatic":24839,"ainees":24840,"Ġ`":24841,"ikos":24842,"ĠClassics":24843,"ibu":24844,"Ġmilitant":24845,"Pad":24846,"ĠYo":24847,"Ġgenerators":24848,"Ep":24849,"Ġinstallment":24850,"ĠTraffic":24851,"ĠSolo":24852,"ĠAttack":24853,"developed":24854,"ĠNeville":24855,"Ġvendors":24856,"Ġog":24857,"Ġevid":24858,"Ġlust":24859,"bernatorial":24860,"nm":24861,"ĠWess":24862,"Ġshipyard":24863,"Ġprofic":24864,"ĠDone":24865,"ĠStur":24866,"Ġherd":24867,"ĠVie":24868,"special":24869,"ĠWad":24870,"ĠImmigration":24871,"ĠBaba":24872,"rewsbury":24873,"ivka":24874,"Ġchick":24875,"China":24876,"quist":24877,"grat":24878,"Ġpremise":24879,"ĠISIL":24880,"ibo":24881,"Ġnursery":24882,"Ġsampling":24883,"Mil":24884,"Ġhards":24885,"ĠRE":24886,"istice":24887,"Ġdaylight":24888,"Ä±r":24889,"uire":24890,"urnal":24891,"Ġtravelers":24892,"rification":24893,"ĠString":24894,"ĠVog":24895,"Ġconducts":24896,"ĠPoin":24897,"ĠGE":24898,"ĠRookie":24899,"oum":24900,"ĠTR":24901,"fle":24902,"ĠSÃ¼":24903,"Ġinvites":24904,"Ġhesitated":24905,"ĠDocumentary":24906,"ĠGale":24907,"jas":24908,"ĠKS":24909,"ĠParts":24910,"ĠDonovan":24911,"ĠLoop":24912,"!âĢĻ":24913,"Ġbuyers":24914,"ĠNursing":24915,"Ġdistracted":24916,"ĠIndy":24917,"ĠBurk":24918,"Ġmelodic":24919,"jet":24920,"ĠRhin":24921,"ornings":24922,"Ġcloset":24923,"ĠDO":24924,"ĠOK":24925,"Ġexploit":24926,"Ġbilateral":24927,"à¤°":24928,"ĠBarbados":24929,"ĠSÃ¡nchez":24930,"ĠSunny":24931,"Ġscratch":24932,"ĠWerner":24933,"Lu":24934,"ĠCooperation":24935,"ĠLoth":24936,"uins":24937,"ĠBirthday":24938,"eer":24939,"itored":24940,"arettes":24941,"Ġsocialism":24942,"Ġsexy":24943,"ĠFeature":24944,"ĠRemember":24945,"ĠSail":24946,"Ġoutpost":24947,"Walk":24948,"ĠNI":24949,"Ġdeed":24950,"gos":24951,"utant":24952,"Ġimpacted":24953,"Ġsustainability":24954,"Ġexclusion":24955,"Ġfianc":24956,"Ġwooded":24957,"Ġsaddle":24958,"Edward":24959,"ĠLaksh":24960,"ĠHeidelberg":24961,"Ġobjections":24962,"Ġanthropology":24963,"Ġgem":24964,"ĠJensen":24965,"ĠErd":24966,"lop":24967,"Ġperipheral":24968,"ĠLatter":24969,"ĠAnthrop":24970,"take":24971,"Ġconsiderations":24972,"ĠBishops":24973,"ĠTrial":24974,"Ġrevolves":24975,"ĠHubbard":24976,"Ġripped":24977,"Ġmedall":24978,"ĠLydia":24979,"inting":24980,"Ġsheer":24981,"Ġexpose":24982,"ĠKnowledge":24983,"corn":24984,"Ġspanned":24985,"ĠRegent":24986,"pel":24987,"uces":24988,"ĠBrat":24989,"Ġelongated":24990,"Ġcreators":24991,"Ġpotatoes":24992,"Ã¡k":24993,"Ġambush":24994,"ĠHands":24995,"ĠDash":24996,"Ġcompose":24997,"Ġorganist":24998,"quit":24999,"ĠDodd":25000,"Ġanal":25001,"apter":25002,"Ġrefurbished":25003,"Ġcatcher":25004,"Ġdare":25005,"ĠSto":25006,"idelity":25007,"ĠFO":25008,"Australian":25009,"ĠTheresa":25010,"ĠÂ«":25011,"inspired":25012,"ĠÎ¼":25013,"Ġinternally":25014,"inational":25015,"ĠTot":25016,"ĠLigue":25017,"Ġconsume":25018,"Ġcuriosity":25019,"ĠMoving":25020,"Battle":25021,"Head":25022,"ĠLau":25023,"Ġguarded":25024,"ĠFigure":25025,"Ġmajors":25026,"Ġinsignia":25027,"Ġoutreach":25028,"ĠPrivy":25029,"ĠSchwarz":25030,"ĠEvidence":25031,"Ġduct":25032,"ĠMerchant":25033,"ĠWriter":25034,"ĠMental":25035,"Ġrooted":25036,"Ġdigits":25037,"ĠFoss":25038,"Ġrhythmic":25039,"umption":25040,"Ġarising":25041,"ovian":25042,"ĠPeoples":25043,"acas":25044,"oks":25045,"Ġaccusing":25046,"Ã«l":25047,"ĠMiddleton":25048,"Mas":25049,"ĠStanton":25050,"ĠRuf":25051,"ĠSatellite":25052,"Ġ1770":25053,"Ġspinal":25054,"ĠWolves":25055,"Ġbee":25056,"Ġammon":25057,"doors":25058,"ĠMandarin":25059,"ĠSlow":25060,"Ġdonors":25061,"Ġclinics":25062,"Ġshareholder":25063,"ĠCir":25064,"ĠEspa":25065,"Ġdeserve":25066,"Ġmelodies":25067,"ĠKier":25068,"ĠWinner":25069,"Ġarth":25070,"Ġremed":25071,"ĠPilot":25072,"mberg":25073,"Ġreflex":25074,"andem":25075,"ĠKappa":25076,"Î³":25077,"highest":25078,"ĠWich":25079,"Sub":25080,"Ġpolished":25081,"Ġmirrors":25082,"Âła":25083,"ĠChrysler":25084,"ĠRomanesque":25085,"ĠWhatever":25086,"Ġforfe":25087,"ĠUAE":25088,"ĠMega":25089,"ĠBacon":25090,"inetic":25091,"Ġannexation":25092,"ĠPeterborough":25093,"Ġamounted":25094,"moon":25095,"ĠAlumni":25096,"ĠPeck":25097,"pets":25098,"imated":25099,"1955":25100,"Ġhipp":25101,"Ġprisons":25102,"Sports":25103,"Ġsearches":25104,"fal":25105,"ĠFury":25106,"ĠClubs":25107,"Ġwicked":25108,"ĠThÃ©":25109,"ourses":25110,"Ġorchid":25111,"ĠWendy":25112,"iona":25113,"Ġdoctr":25114,"colleg":25115,"Ġoversight":25116,"Ġfug":25117,"bey":25118,"ĠpH":25119,"ĠWilkinson":25120,"ĠWheat":25121,"Ġmagistrate":25122,"ĠNJ":25123,"arate":25124,"Ġseab":25125,"Ġprospects":25126,"kt":25127,"Ġpreacher":25128,"ĠMash":25129,"utz":25130,"Ġairst":25131,"ĠNaj":25132,"yst":25133,"Ġorthodox":25134,"alde":25135,"pts":25136,"ĠUnic":25137,"Ġfamously":25138,"ĠSecretariat":25139,"ĠBio":25140,"inney":25141,"ĠWWF":25142,"Ġrains":25143,"Ġbundle":25144,"XT":25145,"ĠCounter":25146,"ĠTart":25147,"Ġpolling":25148,"ĠMayer":25149,"Ġhandles":25150,"Ġsynth":25151,"wr":25152,"Ġtrolley":25153,"Ġwherever":25154,"tym":25155,"åħ":25156,"Ġcracked":25157,"Stars":25158,"lectic":25159,"ĠTran":25160,"ridae":25161,"Ġreintro":25162,"aden":25163,"ĠFuk":25164,"Ġphilosophers":25165,"fan":25166,"vic":25167,"robe":25168,"ĠBelarusian":25169,"Ġlogs":25170,"Ġanswering":25171,"ĠShrewsbury":25172,"ayne":25173,"ĠHole":25174,"Ġsidewalk":25175,"ĠCage":25176,"Ġ1788":25177,"Ġinstability":25178,"Ġimposing":25179,"picuous":25180,"ucha":25181,"ĠGuill":25182,"Ġdelivers":25183,"Ġfifteenth":25184,"ptic":25185,"ĠQuant":25186,"ĠBrune":25187,"arne":25188,"ĠBia":25189,"Ġanxious":25190,"Ġtying":25191,"ĠAug":25192,"thren":25193,"ĠChiang":25194,"-,":25195,"Id":25196,"ĠDominion":25197,"ĠPiedmont":25198,"yam":25199,"Ġprotects":25200,"Lost":25201,"Ġdiscretion":25202,"Ġcontractors":25203,"Ġrepublican":25204,"ĠPing":25205,"Ġboycott":25206,"ĠGwen":25207,"Ġtenant":25208,"Ġgradient":25209,"Ġaston":25210,"ĠOpening":25211,"VR":25212,"fixed":25213,"without":25214,"ĠLights":25215,"Ġcomr":25216,"ĠRaleigh":25217,"ĠAlma":25218,"Ġconvened":25219,"ignment":25220,"Ġharn":25221,"artments":25222,"Ġsusceptible":25223,"Ã¡il":25224,"Ġmagnificent":25225,"ĠSeeing":25226,"ĠXVI":25227,"ieft":25228,"rh":25229,"ĠPug":25230,"Ãºs":25231,"Operation":25232,"vester":25233,"ĠMarseille":25234,".\".":25235,"czy":25236,"ĠDah":25237,"Ġdiscarded":25238,"Ġprophet":25239,"Ġpetrol":25240,"icates":25241,"Son":25242,"enk":25243,"Ġplayable":25244,"Ġcanals":25245,"elope":25246,"ĠTheod":25247,"ĠLibr":25248,"ĠSindh":25249,"ĠMartÃŃnez":25250,"bud":25251,"erion":25252,"ĠNur":25253,"Ġcritique":25254,"Ġplag":25255,"Ġ126":25256,"Ġarchipelago":25257,"Ġpreseason":25258,"ĠFind":25259,"Ġdefinite":25260,"ferences":25261,"ĠGuerrero":25262,"aroo":25263,"Ġdisband":25264,"Ġselections":25265,"Ġarrows":25266,"deacon":25267,"Ġmacro":25268,"Ġpist":25269,"ĠAmbro":25270,"ĠKeys":25271,"ĠPK":25272,"Ġweaker":25273,"Ġendeav":25274,"ĠPresley":25275,"eny":25276,"opening":25277,"Ġscan":25278,"Ġtransporting":25279,"Ġcleaned":25280,"emouth":25281,"eye":25282,"ĠChick":25283,"Ġscenarios":25284,"Ġaft":25285,"Ġmedley":25286,"Ġillustrate":25287,"Ġworm":25288,"ĠExposition":25289,"Ġabused":25290,"ĠGetty":25291,"ĠBentley":25292,"gold":25293,"ĠYaz":25294,"Ġpulmon":25295,"ĠFernÃ¡ndez":25296,"Italian":25297,"Ġprecinct":25298,"nyder":25299,"hele":25300,"ĠMarks":25301,"Ġseminars":25302,"ĠBibli":25303,"Ġblinked":25304,"Ġmont":25305,"lessness":25306,"ĠHubert":25307,"lyss":25308,"cies":25309,"ĠBB":25310,"ivism":25311,"Ġfost":25312,"Ġperpetr":25313,"Ġmantle":25314,"ĠQuincy":25315,"structed":25316,"Ġpumps":25317,"Ġ230":25318,"ĠProtocol":25319,"Ġpropose":25320,"emer":25321,"owe":25322,"Power":25323,"Ġdisagreement":25324,"Entertainment":25325,"Li":25326,"ossip":25327,"Ġornamental":25328,"ĠPP":25329,"Jes":25330,"atinate":25331,"ĠTick":25332,"ĠAtari":25333,"Ġaper":25334,"ĠHumb":25335,"igu":25336,"Post":25337,"Ġproblematic":25338,"Ġgaps":25339,"arthen":25340,"Blood":25341,"adena":25342,"Ġbaseman":25343,"Ġencouragement":25344,"ĠFulton":25345,"Ġcarriages":25346,"ĠJudicial":25347,"ĠNicholson":25348,"ĠParr":25349,"ausole":25350,"Ġremaster":25351,"Ġinterconn":25352,"Ġfamine":25353,"ĠOldham":25354,"Ġprotocols":25355,"ĠZa":25356,"1918":25357,"asu":25358,"zt":25359,"Ġresponding":25360,"Ġhydroelectric":25361,"ĠPaso":25362,"Ġ210":25363,"estro":25364,"ĠResults":25365,"ĠWaterford":25366,"ĠSignal":25367,"ĠSunni":25368,"itha":25369,"into":25370,"ĠEliza":25371,"ĠClinical":25372,"ĠJasper":25373,"jah":25374,"Ġmant":25375,"tenberg":25376,"ylie":25377,"Ġprosperous":25378,"Ġtapped":25379,"igny":25380,"Ġdiffered":25381,"ĠHap":25382,"ĠBreton":25383,"ĠCrescent":25384,"undi":25385,"sponsored":25386,"Ġpenal":25387,"Ġmang":25388,"itya":25389,"Ġrespects":25390,"Ġsteamer":25391,"Ġgymnastics":25392,"ĠStrauss":25393,"phosph":25394,"short":25395,"onyms":25396,"Ġinteger":25397,"UCN":25398,"ĠTea":25399,"ĠKathleen":25400,"ĠEre":25401,"Ġemphasize":25402,"ĠHoover":25403,"Ġloudly":25404,"quired":25405,"ĠDavenport":25406,"Sweet":25407,"pendicular":25408,"Ġseparates":25409,"Bal":25410,"ĠCorporate":25411,"mor":25412,"ivorous":25413,"allo":25414,"ĠRuther":25415,"Ġmonitored":25416,"ĠÃīcole":25417,"olls":25418,"Ġapplicants":25419,"ĠAeron":25420,"Ġalloy":25421,"Ġmasonry":25422,"ĠAns":25423,"today":25424,"ĠCharlton":25425,"ĠFreddie":25426,"Ġvisc":25427,"Ġbury":25428,"ĠCrafts":25429,"Ġforged":25430,"Ġdrains":25431,"ĠEleven":25432,"iso":25433,"Ġdestined":25434,"Ġoutrage":25435,"forms":25436,"Ġorganizers":25437,"ulties":25438,"yre":25439,"ĠBY":25440,"ĠRwanda":25441,"Ġtaller":25442,"Ġvernacular":25443,"ĠPure":25444,"ĠAnj":25445,"ĠHK":25446,"Ġweights":25447,"ĠBerger":25448,"ĠKensington":25449,"ĠSeah":25450,"Ġerotic":25451,"IX":25452,"Ġdeleted":25453,"Ġprospective":25454,"Ġremixes":25455,"Ġmetabolism":25456,"ĠSarg":25457,"Ġnuns":25458,"Ġrelocation":25459,"----":25460,"gt":25461,"ĠAmer":25462,"ĠActive":25463,"Ġillegitimate":25464,"aldo":25465,"ĠDaytona":25466,"ĠSylvia":25467,"ĠLublin":25468,"ĠGreco":25469,"ometry":25470,"hoe":25471,"Ġarises":25472,"luent":25473,"ummy":25474,"ĠMouse":25475,"obacter":25476,"ĠColise":25477,"Ġsooner":25478,"Ġpurported":25479,"ĠOverse":25480,"ĠRak":25481,"ĠRaff":25482,"ĠDegree":25483,"Ġinfants":25484,"release":25485,"ĠWein":25486,"aeda":25487,"covered":25488,"indi":25489,"ĠSpit":25490,"Ġ127":25491,"Ġappealing":25492,"ochemistry":25493,"Ġgubernatorial":25494,"ĠPerfect":25495,"Ġsmiles":25496,"ĠFeld":25497,"ĠArchibald":25498,"Ġattorneys":25499,"opic":25500,"ĠDug":25501,"ĠForward":25502,"ĠPauline":25503,"ĠCain":25504,"Ġdetermin":25505,"Ġbod":25506,"inged":25507,"ĠHercules":25508,"Ġcompressed":25509,"ĠForever":25510,"Ġfertility":25511,").\"":25512,"Ġexceptionally":25513,"Ġupgrades":25514,"Water":25515,"Ġstabbed":25516,"Ġsuccumb":25517,"rients":25518,"ĠGilm":25519,"Ġsire":25520,"acet":25521,"Ġambition":25522,"Ġplaza":25523,"Ġmorality":25524,"Rom":25525,"ĠAmÃ©":25526,"ĠTeaching":25527,"Ġcapitalism":25528,"ĠAvon":25529,"hang":25530,"ĠZhong":25531,"ÂłâĢĶ":25532,"ĠNapoleonic":25533,"ĠVishnu":25534,"Ġdensely":25535,"Ġdictatorship":25536,"Sea":25537,"bid":25538,"ayo":25539,"upe":25540,"ucc":25541,"ĠPaolo":25542,"ĠUzbekistan":25543,"Pre":25544,"Ġarrog":25545,"Ġpoker":25546,"fork":25547,"ĠSave":25548,"ĠAntiqu":25549,"Ġcroc":25550,"ĠDerry":25551,"ĠSunshine":25552,"Ġsatire":25553,"ĠShelley":25554,"ĠAvengers":25555,"Ġcosta":25556,"Ġraided":25557,"Ġasymmet":25558,"Ġmonitors":25559,"Ġlattice":25560,"ĠBelmont":25561,"Ġawaiting":25562,"intosh":25563,"Ġalgebraic":25564,"blood":25565,"Ġsensory":25566,"Ġvoluntarily":25567,"Ġba":25568,"ĠNW":25569,"ĠWeaver":25570,"Ġconsolidation":25571,"ĠNT":25572,"ĠFairfax":25573,"Ġethnicity":25574,"ĠSanctuary":25575,"Ġbackdrop":25576,"ĠBahamas":25577,"Na":25578,"Ġpenned":25579,"ĠTowers":25580,"boarding":25581,"Ġsecre":25582,"Latin":25583,"notes":25584,"ĠWarwickshire":25585,"Ġdots":25586,"urus":25587,"ĠSpike":25588,"Ġkernel":25589,"ĠRodgers":25590,"Ġregent":25591,"Ġflashed":25592,"Mother":25593,"Ġpreserves":25594,"Ġcorrection":25595,"Ġcavity":25596,"ĠLyons":25597,"ĠØ§":25598,"Ġsimulcast":25599,"brough":25600,"ĠEmm":25601,"ĠExperience":25602,"achim":25603,"Ġ124":25604,"ĠUltra":25605,"Ġconvex":25606,"ĠGroups":25607,"ĠProvisional":25608,"Ġfumble":25609,"Ġharp":25610,"Ġemotionally":25611,"Ġwarl":25612,"Ġalgae":25613,"ĠExpo":25614,"ĠRs":25615,"ĠWester":25616,"strom":25617,"ĠPeel":25618,"ĠRamsey":25619,"ĠSting":25620,"orescence":25621,"Ġassumptions":25622,"asian":25623,"ĠAnand":25624,"ĠDeputies":25625,"Ġinappropriate":25626,"Ġexploited":25627,"ÂŃ":25628,"ĠMartins":25629,"ĠAry":25630,"Ġvanished":25631,"aires":25632,"Ġdestructive":25633,"ĠSarajevo":25634,"ĠTrem":25635,"Ġmelting":25636,"tsky":25637,"ombe":25638,"social":25639,"Ġgi":25640,"Ġcoronation":25641,"vik":25642,"Ġblowing":25643,"Ġstunned":25644,"Ġnegatively":25645,"Ġantagonist":25646,"quel":25647,"ĠSharks":25648,"retto":25649,"Variety":25650,"Ġsettler":25651,"floor":25652,"ĠMeadow":25653,"ĠHodg":25654,"nagar":25655,"ĠNYC":25656,"Ġseals":25657,"Ġaisle":25658,"ĠBT":25659,"Ġcannabis":25660,"Ġwed":25661,"ĠShia":25662,"ĠMafia":25663,"Ġattribute":25664,"ĠComplete":25665,"ĠCover":25666,"coni":25667,"watch":25668,"Ġadolesc":25669,"ĠMT":25670,"oughton":25671,"ĠPetrov":25672,"charge":25673,"ĠClap":25674,"ĠBarney":25675,"Ġwires":25676,"umba":25677,"Ġtextbook":25678,"ĠCommanding":25679,"ĠToulouse":25680,"Ġasserts":25681,"Ġpulp":25682,".'\"":25683,"grown":25684,"Ġtally":25685,"ĠPomerania":25686,"ĠBelize":25687,"major":25688,"ĠHub":25689,"ĠSiem":25690,"isexual":25691,"Ġentrances":25692,"ĠNguy":25693,"ĠCyrus":25694,"Ġdiagnostic":25695,"outed":25696,"Hon":25697,"ĠShankar":25698,"Ġdisturbance":25699,"Ġsynonym":25700,"Ġbenefited":25701,"Ġunmarried":25702,"Ġfuscous":25703,"Ġfrown":25704,"ĠPurdue":25705,"yes":25706,"ooter":25707,"Ġbamboo":25708,"ĠWorlds":25709,"asped":25710,"Ġwaterfall":25711,"ĠSik":25712,"Ġdisguise":25713,"iad":25714,"ĠYounger":25715,"Ġsins":25716,"ĠBoyle":25717,"ĠCornish":25718,"Ġpropulsion":25719,"Ġcitation":25720,"Ġcalculation":25721,"ĠFuji":25722,"ĠKern":25723,"ĠElias":25724,"bag":25725,"ĠFDA":25726,"ĠHiros":25727,"Ġshining":25728,"ĠRunning":25729,"ĠMalik":25730,"Ġinitiate":25731,"ĠMathew":25732,"Ġcups":25733,"ĠRiz":25734,"Ġprocure":25735,"assa":25736,"Ġroadway":25737,"Ġfortunes":25738,"Ñĩ":25739,"Ġunbeaten":25740,"Ġpend":25741,"Ġexpulsion":25742,"Ġmidway":25743,"Ġburns":25744,"elis":25745,"Ġnons":25746,"Ġembark":25747,"1949":25748,"ĠMetz":25749,"Cur":25750,"Ġhanged":25751,"Ġtug":25752,"Ġmiser":25753,"ĠPau":25754,"Ġpresentations":25755,"äº":25756,"ĠMatth":25757,"Ġbirths":25758,"ĠFeather":25759,"1954":25760,"ophy":25761,"Ġvows":25762,"ĠVoy":25763,"nov":25764,"Ġsurreal":25765,"Ġinstrumentation":25766,"Commun":25767,"ĠGPS":25768,"chenko":25769,"Ġhalft":25770,"dev":25771,"AL":25772,"Ġ1777":25773,"ĠNissan":25774,"Ġdrap":25775,"Ġvillains":25776,"Ġshoved":25777,"uran":25778,"ĠPlaying":25779,"ĠCÃ³":25780,"ĠHouses":25781,"Ġsanct":25782,"emption":25783,"Ġbotanical":25784,"illan":25785,"ĠLeonardo":25786,"Ġabort":25787,"ĠCypriot":25788,"Ġfourteenth":25789,"araoh":25790,"Ġcontention":25791,"\",\"":25792,"because":25793,"ĠSpecifically":25794,"ĠLuigi":25795,"ĠDear":25796,"Central":25797,"ĠAngus":25798,"Ġfacilitated":25799,"Ġqualifier":25800,"street":25801,"Ġamphibious":25802,"nard":25803,"Ġcomparisons":25804,"Ġvaccine":25805,"opl":25806,"ĠAlicia":25807,"ĠAnast":25808,"ĠRomeo":25809,"ĠMcKin":25810,"ĠHarley":25811,"Ġtile":25812,"ĠIgor":25813,"Ġreceip":25814,"hrer":25815,"ĠEdison":25816,"Ġsimultaneous":25817,"ĠMÃ¼ller":25818,"ivial":25819,"Ġvisually":25820,"Ġbowed":25821,"Keep":25822,"Ġceded":25823,"ĠStro":25824,"ĠAlexis":25825,"ĠProtestants":25826,"literally":25827,"lated":25828,"Ġpreaching":25829,"ĠUrb":25830,"Ġoverwhelmed":25831,"Ġchoral":25832,"ĠAudi":25833,"ĠSnake":25834,"ĠGoldman":25835,"ĠLiberia":25836,"Ġchasing":25837,"Ã©nÃ©":25838,"aphys":25839,"lander":25840,"ĠSynod":25841,"ĠChallenger":25842,"Ġcoincide":25843,"olish":25844,"vern":25845,"ifully":25846,"ĠMalawi":25847,"ĠQuaker":25848,"Ġmelt":25849,"ĠVanessa":25850,"ĠSung":25851,"Ġrealization":25852,"Ġencoding":25853,"ĠAristotle":25854,"Ġcylindrical":25855,"ÂłkW":25856,"Ġselecting":25857,"ĠCats":25858,"ĠJuvent":25859,"ĠTactical":25860,"ĠCitation":25861,"ĠCPU":25862,"Acc":25863,"ĠPang":25864,"Ġwhales":25865,"ĠMorse":25866,"Ġparallels":25867,"Ġlonely":25868,"ĠCandid":25869,"ĠRutgers":25870,"Ġsquir":25871,"Child":25872,"ĠÃĺ":25873,"ĠWoody":25874,"vill":25875,"Ġglut":25876,"ĠCyber":25877,"Ġstrokes":25878,"estinal":25879,"ĠHQ":25880,"Ġgoodbye":25881,"ĠResource":25882,"ĠHolding":25883,"ĠPens":25884,"Ġprobation":25885,"ĠConst":25886,"aliation":25887,"ĠCarla":25888,"ĠCaf":25889,"ebel":25890,"gorod":25891,"ĠGlam":25892,"broken":25893,"Ġelectromagnetic":25894,"Ġreplies":25895,"Ġresembled":25896,"ĠTeacher":25897,"Ġdiverted":25898,"Ġinacc":25899,"sin":25900,"ĠDevelop":25901,"Ġmanipulation":25902,"âĢĶ\"":25903,"ĠSSR":25904,"Ġmortars":25905,"cheon":25906,"Ġgriev":25907,"ĠHild":25908,"Ġsized":25909,"Ġcentimeters":25910,"Ġterminology":25911,"Ġli":25912,"lections":25913,"Ġprocessors":25914,"ĠConstituency":25915,"arty":25916,"ĠBrab":25917,"ĠDed":25918,"uffled":25919,"apuram":25920,"Ġneuros":25921,"Ġchor":25922,"Ġdisqualified":25923,"moor":25924,"Ġincidence":25925,"Neil":25926,"Hip":25927,"Ġ155":25928,"Empire":25929,"operated":25930,"Ġsaxophone":25931,"Ġlounge":25932,"Ġindicator":25933,"ĠNP":25934,"ĠNaomi":25935,"ĠARIA":25936,"straÃŁe":25937,"Ġ145":25938,"rawl":25939,"Ġbitch":25940,"Ġconscience":25941,"estial":25942,"Ġlectured":25943,"ĠEur":25944,"Ġfantastic":25945,"Ġdeclares":25946,"Ġcents":25947,"anched":25948,"iral":25949,"inkle":25950,"Ġcortex":25951,"opard":25952,"ĠDaddy":25953,"ĠClair":25954,"ĠMcLaren":25955,"Ġminimize":25956,"ĠTucson":25957,"Ġremarried":25958,"Ġanatomy":25959,"ĠPist":25960,"Ġnominees":25961,"Ġtrench":25962,"Ġdispro":25963,"Ġcourtesy":25964,"Ġpigs":25965,"Ġparan":25966,"Ġmotive":25967,"105":25968,"ĠTeatro":25969,"ersfield":25970,"Ġbeginnings":25971,"Ġglowing":25972,"Ġgerm":25973,"Ġleap":25974,"rae":25975,"Ġausp":25976,"isman":25977,"ĠDaly":25978,"Ġexits":25979,"political":25980,"Ġtransverse":25981,"Ġdiamonds":25982,"Ġvisions":25983,"ĠNom":25984,"Ġresearched":25985,"Ġaz":25986,"ĠTec":25987,"ĠWizard":25988,"anguard":25989,"acements":25990,"idea":25991,"ĠFreder":25992,"ĠAngelo":25993,"Cro":25994,"Est":25995,"psons":25996,"fs":25997,"ĠDarling":25998,"ĠFL":25999,"ĠLaurie":26000,"ĠMurder":26001,"ĠHyper":26002,"Ġvintage":26003,"Ġgrounded":26004,"Ġintending":26005,"growing":26006,"iq":26007,"ĠDoncaster":26008,"ĠPulitzer":26009,"ĠSas":26010,"andum":26011,"ĠFarmers":26012,"Ġrevital":26013,"ortunate":26014,"ĠLumpur":26015,"ĠPrepar":26016,"collegiate":26017,"._":26018,"illic":26019,"Ġstrang":26020,"Ġdealers":26021,"Ġcommissioners":26022,"Ġheats":26023,"Ġtaxp":26024,"1953":26025,"Ġundertaking":26026,"ĠIvory":26027,"Wall":26028,"Ġfrig":26029,"Ġambient":26030,"NF":26031,"iton":26032,"andar":26033,"Ġfluor":26034,"Ġurgent":26035,"ĠGow":26036,"ĠCoordin":26037,"ĠNure":26038,"ĠRomantic":26039,"ĠFamous":26040,"Ġdefects":26041,"Ġevenings":26042,"ĠHalloween":26043,"ĠMultiple":26044,"ĠSalzburg":26045,"Ġreinforce":26046,"ĠCritical":26047,"ĠDickinson":26048,"edience":26049,"ĠExpeditionary":26050,"Ġprojecting":26051,"ĠDynamo":26052,"oclass":26053,"degree":26054,"Ġsilly":26055,"Ġtelegraph":26056,"Ġforc":26057,"ĠBridges":26058,"ĠMint":26059,"Ġgreenhouse":26060,"ĠOro":26061,"ĠLakers":26062,"ĠPetro":26063,"DD":26064,"Ġpreparatory":26065,"antically":26066,"WW":26067,"Ġtreatise":26068,"ĠMechanical":26069,"Ġfrightened":26070,"source":26071,"eson":26072,"Ġdangers":26073,"ĠWatkins":26074,"poem":26075,"ĠTownsend":26076,"ĠSass":26077,"ĠMeteor":26078,"ĠCheltenham":26079,"Ġgrapes":26080,"ĠConsid":26081,"ĠFont":26082,"ĠStrasbourg":26083,"Ġthor":26084,"ĠPrevention":26085,"astes":26086,"ĠSevent":26087,"Ġbiographical":26088,"ĠKyrgyz":26089,"Ġstationary":26090,"ĠManaging":26091,"Sex":26092,"Ġsiding":26093,"á»ĩ":26094,"mot":26095,"oscop":26096,"ĠFIA":26097,"ĠRover":26098,"ĠUtrecht":26099,"Ver":26100,"ĠTears":26101,"Ġconjug":26102,"ĠOy":26103,"professional":26104,"Ġdenial":26105,"Ġthreaten":26106,"Ġintends":26107,"mur":26108,"Ġvapor":26109,"Pers":26110,"Ġmurals":26111,"ĠMarilyn":26112,"ĠDesmond":26113,"egr":26114,"ĠKatrina":26115,"ursion":26116,"ĠBeaumont":26117,"ĠVoc":26118,"Ġincredibly":26119,"Name":26120,"Ġastronomical":26121,"Ġgel":26122,"Ġenvisioned":26123,"Ġdownward":26124,"ĠKav":26125,"every":26126,"å®":26127,"ĠCitizen":26128,"ĠCoffee":26129,"ĠMoody":26130,"ĠStrath":26131,"ĠAva":26132,"indust":26133,"Ġauthorised":26134,"ĠTomas":26135,"ĠBoot":26136,"ĠPeer":26137,"ĠSharma":26138,"ĠArchie":26139,"tingu":26140,"ĠPanzer":26141,"ĠShuttle":26142,"Ġsediments":26143,"eze":26144,"olding":26145,"Ġlibrarian":26146,"ĠKnock":26147,"ĠHayden":26148,"nde":26149,"Ġtranscend":26150,"Ġavid":26151,"ĠNRL":26152,"Ġchronicles":26153,"Ġembarrassed":26154,"inkled":26155,"ĠVod":26156,"Ġyoga":26157,"iku":26158,"ĠMask":26159,"ocument":26160,"perors":26161,"BT":26162,"Ġwww":26163,"engeance":26164,"Ġelders":26165,"Ġpalms":26166,"ĠMilitia":26167,"ĠMacc":26168,"Ġcannons":26169,"Âłhp":26170,"Ġditch":26171,"Ġempirical":26172,"ĠCzechoslovak":26173,"lya":26174,"GT":26175,"Mem":26176,"jak":26177,"ĠSadd":26178,"Ġdenote":26179,"Ġultra":26180,"ĠPasser":26181,"Ġcursed":26182,"ĠMcCorm":26183,"Ġglacial":26184,"Ġdeteriorated":26185,"Ġwield":26186,"Ġeconomies":26187,"ĠDonetsk":26188,"Ġinvasive":26189,"Ġvenom":26190,"Ġchloride":26191,"Ġsafer":26192,"det":26193,"Ġcompelling":26194,"Ġimpair":26195,"allah":26196,"ĠPotomac":26197,"Ġcountless":26198,"ĠTemper":26199,"udence":26200,"othed":26201,"ĠCups":26202,"birth":26203,"kick":26204,"esting":26205,"ĠSpeaking":26206,"Main":26207,"ĠAnaly":26208,"anao":26209,"Ġdisagreed":26210,"Ele":26211,"Ġviruses":26212,"Ġlandmarks":26213,"tained":26214,"UI":26215,"ĠEM":26216,"Ġcontempt":26217,"Ġallev":26218,"Ġaffirm":26219,"Ġmicros":26220,"ĠChandra":26221,"funded":26222,"mentation":26223,"wu":26224,"Ġglared":26225,"ĠHillary":26226,"104":26227,"ĠFortress":26228,"ĠGuer":26229,"ÈĻti":26230,"idable":26231,"ĠPietro":26232,"Ġridiculous":26233,"ergic":26234,"ĠGaming":26235,"Ġcorrected":26236,"ĠRoche":26237,"Leg":26238,"Union":26239,"ĠSemi":26240,"Ġdatabases":26241,"Second":26242,"ĠDoor":26243,"ĠGrange":26244,"ĠThorough":26245,"Ġaverages":26246,"Baby":26247,"nat":26248,"Ġgenetics":26249,"wreck":26250,"itives":26251,"ĠYoko":26252,"Ġmorphology":26253,"iera":26254,"Ġensued":26255,"ĠClinic":26256,"etto":26257,"ĠGest":26258,"Ġdesktop":26259,"gram":26260,"zhen":26261,"ĠTests":26262,"Ġassaulted":26263,"Æ°":26264,"ihad":26265,"signup":26266,"ĠAV":26267,"again":26268,"ĠAmph":26269,"ĠIris":26270,"Ġflick":26271,"ĠVega":26272,"Ġprevailing":26273,"\");":26274,"Ġbordering":26275,"Ġantiquity":26276,"ĠAreas":26277,"Ġmuscular":26278,"Ġfins":26279,"Ġcharting":26280,"Âł4":26281,"Ġunification":26282,"Ġtranslate":26283,"ĠGerry":26284,"abouts":26285,"renches":26286,"phalt":26287,"Ġceramics":26288,"Ly":26289,"ĠIon":26290,"ĠJian":26291,"Ġdeserved":26292,"ĠFlower":26293,"Ġinvestigator":26294,"Ġcategorized":26295,"ĠMama":26296,"Beaut":26297,"ĠMek":26298,"ĠTherap":26299,"ĠKop":26300,"ĠSeal":26301,"opsy":26302,"Dis":26303,"stre":26304,"Ġperiodically":26305,"Ġascent":26306,"ĠRaphael":26307,"rador":26308,"stars":26309,"quisition":26310,"Ġsymphony":26311,"inen":26312,"Ġtextbooks":26313,"Ġoverseeing":26314,"culture":26315,"ĠLeah":26316,"Ġknighted":26317,"Sing":26318,"iste":26319,"ectory":26320,"Ġ132":26321,"Ġtherapeutic":26322,"igne":26323,"Ġmultimedia":26324,"backed":26325,"fires":26326,"ĠRout":26327,"Ġlantern":26328,"ĠCaleb":26329,"ĠLark":26330,"gev":26331,"Ġgrains":26332,"ĠFlores":26333,"ĠChargers":26334,"Ġstellar":26335,"Ġket":26336,"Ġroy":26337,"cad":26338,"ĠMou":26339,"ulas":26340,"Ġsyllable":26341,"ĠConfuc":26342,"atine":26343,"bearing":26344,"Ġæ":26345,"ĠRole":26346,"ĠCareer":26347,"Ġmetaphor":26348,"Ġants":26349,"Ram":26350,"zb":26351,"Ġq":26352,"Ġoverr":26353,"Ġniche":26354,"ĠDunk":26355,"Ġkicks":26356,"ineas":26357,"ricken":26358,"Tre":26359,"auk":26360,"ĠZah":26361,"Ġunconstitutional":26362,"ĠBonnie":26363,"Ġ1660":26364,"Real":26365,"ĠFinch":26366,"gha":26367,"ĠBowen":26368,"ĠLockheed":26369,"ĠOR":26370,"Ġreacted":26371,"ĠNikolai":26372,"ĠTiff":26373,"Ġprevailed":26374,"ĠDogs":26375,"particularly":26376,"Ġtech":26377,"ĠGarrison":26378,"ĠVu":26379,"Ġjudgement":26380,"otus":26381,"Ġvom":26382,"Ã©dÃ©":26383,"ographed":26384,"ĠHistorian":26385,"match":26386,"Ð¹":26387,"1914":26388,"linger":26389,"1948":26390,"umnus":26391,"ĠLegends":26392,"Ġnuts":26393,"luenced":26394,"ĠSoldiers":26395,"Ġcontradict":26396,"Ġterrace":26397,"Ġdisgr":26398,"Ġvertices":26399,"ĠMcCoy":26400,"Ġspectral":26401,"Ġtermination":26402,"ĠMohan":26403,"Ġhearings":26404,"ĠPrayer":26405,"Ġcriticisms":26406,"Ġauspices":26407,"planes":26408,"agements":26409,"Ġpacks":26410,"ĠVersailles":26411,"Ġamalgamated":26412,"previously":26413,"ĠZoe":26414,"Ġfunk":26415,"ĠGalicia":26416,"astically":26417,"Ġbattleship":26418,"Mount":26419,"zu":26420,"Ġbou":26421,"Ġlime":26422,"ldon":26423,"Ġknot":26424,"Stand":26425,"Ġadvocating":26426,"Ġelectrified":26427,"Ġquarterly":26428,"Ġ1787":26429,"ĠHide":26430,"ĠDro":26431,"ĠEugen":26432,"Ġlivery":26433,"ĠFrey":26434,"urations":26435,"ĠMacK":26436,"designed":26437,"Ġsuperseded":26438,"xx":26439,"ĠPolo":26440,"email":26441,"ĠJays":26442,"Ġseverity":26443,"Ġbilled":26444,"ĠAure":26445,"ĠGallagher":26446,"ĠDamon":26447,"Ġexposing":26448,"Ġloops":26449,"Ġhunted":26450,"ĠHazel":26451,"ĠEdg":26452,"ĠStrip":26453,"ĠTruck":26454,"450":26455,"Ġcontamination":26456,"Ġartery":26457,"Ġdeposition":26458,"ĠTrio":26459,"Ġga":26460,"Ġseism":26461,"ĠSino":26462,"Ġunite":26463,"ĠPeggy":26464,"ĠZheng":26465,"ĠLao":26466,"ĠHertfordshire":26467,"Ġlobbying":26468,"Ġnude":26469,"Ġego":26470,"Ġbrownish":26471,"igeon":26472,"Ġsul":26473,"btn":26474,"Ġeuro":26475,"ĠLevin":26476,"ĠVirgil":26477,"Ġbreathed":26478,"cars":26479,"Ġretaliation":26480,"Ġcanyon":26481,"Ġhormone":26482,"Ġimminent":26483,"Ġlamb":26484,"ĠLibyan":26485,"ensation":26486,"Ġcommunists":26487,"ĠImam":26488,"Stud":26489,"Wait":26490,"ĠKilm":26491,"Ġcompensate":26492,"Ġreasonably":26493,"ĠQin":26494,"Ġgrit":26495,"Ġconserved":26496,"Ġbadminton":26497,"Ġbowled":26498,"edin":26499,"ĠOuter":26500,"ĠNils":26501,"Ġterminals":26502,"ĠRowing":26503,"Ġhalftime":26504,"code":26505,"aryn":26506,"Ġsalvation":26507,"Ġ1784":26508,"ĠExplorer":26509,"ayn":26510,"ĠMcCain":26511,"ĠLod":26512,"ĠJaff":26513,"ĠEaton":26514,"Ġrelocate":26515,"Ġcommemorative":26516,"Ġnobleman":26517,"Ġprevalence":26518,"1941":26519,"ĠBots":26520,"Ġconglomer":26521,"Ġbuyer":26522,"Ġmassac":26523,"ĠWTA":26524,"Ġstrikeouts":26525,"ĠGif":26526,"Ent":26527,"ĠTroop":26528,"Ġinfrared":26529,"Ġstereo":26530,"Ġhut":26531,"auses":26532,"ĠLille":26533,"Ġharv":26534,"Ġlimb":26535,"Ġrunoff":26536,"Ġsaxophon":26537,"Ġhurdles":26538,"rops":26539,"ĠUll":26540,"ffer":26541,"Ġpotassium":26542,"Ġnoteworthy":26543,"Something":26544,"hani":26545,"ĠFilming":26546,"ĠPOW":26547,"Ġdresses":26548,"aban":26549,"ĠHuddersfield":26550,"ĠWond":26551,"ĠHog":26552,"ĠJury":26553,"Ġgenerates":26554,"Ġrhetoric":26555,"ĠGrad":26556,"Turk":26557,"ĠMys":26558,"Ġfilters":26559,"Ġboilers":26560,"Ġhobby":26561,"Ġrup":26562,"ĠGiul":26563,"Ġcauc":26564,"aten":26565,"ĠBingham":26566,"ĠRhythm":26567,"iferous":26568,"ewa":26569,"Ġracer":26570,"ĠLamar":26571,"ĠCody":26572,"ĠGoals":26573,"enzo":26574,"ĠCrete":26575,"olm":26576,"ĠJong":26577,"Ã¤t":26578,"Ġresonance":26579,"\"(":26580,"Ġrabbit":26581,"ĠLesser":26582,"ĠColiseum":26583,"ĠGuth":26584,"Ġ650":26585,"Ġdisco":26586,"Ġpopularized":26587,"ĠPtole":26588,"Ġwhip":26589,"coe":26590,"Ġenclosure":26591,"plain":26592,"rossing":26593,"ĠGuangzhou":26594,"agin":26595,"Ġbye":26596,"Ġefficiently":26597,"ĠNer":26598,"Ġ1778":26599,"ĠMaltese":26600,"ĠMauritius":26601,"alist":26602,"Ġdependence":26603,"Ġgateway":26604,"ysis":26605,"Ġcatalyst":26606,"amen":26607,"ĠYuri":26608,"Fe":26609,"ĠSnyder":26610,"Cola":26611,"ĠCompanion":26612,"Ġalias":26613,"1952":26614,"Ġcalculate":26615,"Ġpawn":26616,"iom":26617,"Ġtoe":26618,"andel":26619,"rens":26620,"Ġsupermarket":26621,"cup":26622,"ropshire":26623,"Ġconsistency":26624,"ĠPrograms":26625,"Ġaccidental":26626,"ĠApparently":26627,"Ġsimplicity":26628,"ĠStrategy":26629,"ĠWatt":26630,"Arts":26631,"Ġreggae":26632,"Ġlandowner":26633,"ĠStratford":26634,"ĠEduardo":26635,"Ġaccreditation":26636,"ĠAverage":26637,"chery":26638,"ĠNortham":26639,"Ġpreferences":26640,"Ġassassin":26641,"ĠNeum":26642,"Ġwatts":26643,"ĠBarracks":26644,"Ġrabbi":26645,"herence":26646,"ĠShap":26647,"Ġparadox":26648,"ĠBoer":26649,"ocytes":26650,"ĠDÃŃ":26651,"ĠBalkans":26652,"Ġugly":26653,"Ġsupplemented":26654,"Ġforthcoming":26655,"Ġdisguised":26656,"Bas":26657,"ĠGoing":26658,"ĠAbbot":26659,"ĠRiders":26660,"Ġresponds":26661,"Ġmasks":26662,"Fil":26663,"ĠEF":26664,"rex":26665,"ĠDiss":26666,"Ġstranded":26667,"Ġstumbled":26668,"ĠSupply":26669,"Ġanalysts":26670,"ĠAe":26671,"ĠBasilica":26672,"ĠER":26673,"ĠResear":26674,"umbles":26675,"Atlantic":26676,"mez":26677,"Ġpopulous":26678,"Ġturf":26679,"Ġabsurd":26680,"ĠHarl":26681,"Ġpractitioner":26682,"Ġspherical":26683,"1946":26684,"urdays":26685,"ĠNath":26686,"Ġinert":26687,"ecd":26688,"Ġlandowners":26689,"ĠBayern":26690,"Ġformulated":26691,"Ġlandfall":26692,"ĠItalia":26693,"Ġrichest":26694,"Ġassistants":26695,"Ġtheologian":26696,"ĠAdel":26697,"ĠSasha":26698,"Ġtraction":26699,"Bahn":26700,"ĠSiv":26701,"zek":26702,"ĠFranciscan":26703,"mani":26704,"Ġsolemn":26705,"Ġsubsidiaries":26706,"nant":26707,"ĠCarnival":26708,"Ġwarns":26709,"Hard":26710,"ĠSergei":26711,"Ġilluminated":26712,"ĠRai":26713,"Ġsou":26714,"Ġinduce":26715,"ĠColchester":26716,"ĠPry":26717,"ĠShang":26718,"ĠTimor":26719,"Ġfielded":26720,"continent":26721,"ĠNeighbor":26722,"Ġscrutiny":26723,"ĠFra":26724,"ĠAlz":26725,"vig":26726,"ĠChir":26727,"Ġunsure":26728,"ĠFacility":26729,"rates":26730,"Ġfri":26731,"ĠHicks":26732,"ĠLoyal":26733,"Ġendless":26734,"Ġindict":26735,"fill":26736,"belt":26737,"ungs":26738,"ippon":26739,"Ġproclaim":26740,"ondiss":26741,"tienne":26742,"ĠCrossing":26743,"jects":26744,"ĠNora":26745,"ĠNoct":26746,"ienne":26747,"ĠPriory":26748,"ĠKenyan":26749,"ĠLeading":26750,"ĠSpa":26751,"ĠAlley":26752,"Ġforestry":26753,"Ġenergetic":26754,"Ġrugged":26755,"ĠCommunists":26756,"Ġbic":26757,"Ġimmortal":26758,"ĠWitness":26759,"ellan":26760,"Kn":26761,"avers":26762,"ĠPalermo":26763,"lach":26764,"Ġfencing":26765,"Ġboring":26766,"ĠCompar":26767,"Ġactresses":26768,"Ġproceeding":26769,"roots":26770,"ĠBly":26771,"Ġvectors":26772,"Ġseldom":26773,"ĠNinth":26774,"ĠCarrier":26775,"ĠCaldwell":26776,"oct":26777,"ĠVarg":26778,"ĠMinh":26779,"Ġaxle":26780,"Ġintervene":26781,"creat":26782,"ritt":26783,"ĠWex":26784,"ĠGraz":26785,"Ġobit":26786,"ĠRichie":26787,"Ġhides":26788,"iak":26789,"ĠContract":26790,"Ġcylinders":26791,"Sah":26792,"ĠTav":26793,"Ġimplicated":26794,"drums":26795,"Ġskysc":26796,"ĠOrioles":26797,"mma":26798,"ĠOu":26799,"ĠVeronica":26800,"Ġ(\"\"":26801,"Ġlowering":26802,"inna":26803,"!!":26804,"ĠDaisy":26805,"Ġhostility":26806,"ĠMonthly":26807,"icher":26808,"Six":26809,"ĠChey":26810,"rotein":26811,"isky":26812,"ĠProsecut":26813,"ĠEasy":26814,"Ġvain":26815,"Ġgroaned":26816,"ĠBenton":26817,"ĠFrog":26818,"Ġbeard":26819,"ĠBarcl":26820,"Ġanalyze":26821,"Ġoverhe":26822,"Ġinvading":26823,"ĠAmtrak":26824,"ĠSerena":26825,"ĠLuca":26826,"Ġdeprived":26827,"ĠMansion":26828,"Ġpractised":26829,"coal":26830,"Ġdenoted":26831,"1951":26832,"stitutes":26833,"negative":26834,"ĠNish":26835,"buck":26836,"osures":26837,"Ġrack":26838,"Ġrepeating":26839,"specially":26840,"1900":26841,"ĠConstance":26842,"ĠSeas":26843,"ĠUSAF":26844,"laws":26845,"ĠDz":26846,"ĠDarius":26847,"Ġnutrients":26848,"Ġyeah":26849,"Ġros":26850,"iquit":26851,"Turn":26852,"wang":26853,"ellate":26854,"Ġmapped":26855,"oxy":26856,"letal":26857,"Ġsuperc":26858,"ĠSimone":26859,"ĠCartoon":26860,"racellular":26861,"ĠKeen":26862,"ĠClean":26863,"ĠNok":26864,"ĠScheme":26865,"ĠGreenwood":26866,"UTC":26867,"ethyl":26868,"ĠNept":26869,"ĠCes":26870,"Ġtablets":26871,"Ġlar":26872,"1936":26873,"entials":26874,"inz":26875,"EU":26876,"awar":26877,"ĠCornelius":26878,"inho":26879,"Ġmixtape":26880,"Ġcongrat":26881,"Ġbests":26882,"arger":26883,"Ġbrackets":26884,"tracks":26885,"Ġprofiles":26886,"Ġlaptop":26887,"Ġdelta":26888,"Ober":26889,"Ġstrains":26890,"Donnell":26891,"ĠKauf":26892,"Ġbombed":26893,"Ġtransparency":26894,"ĠAccordingly":26895,"Anth":26896,"ĠMesa":26897,"atio":26898,"ĠKro":26899,"ĠGoldberg":26900,"doctoral":26901,"Ġlacrosse":26902,"herst":26903,"ĠEvolution":26904,"Ġorbits":26905,"ĠMÃ¡":26906,"Ale":26907,"Ġshattered":26908,"ĠMarino":26909,"Ġhelpless":26910,"Ġthemed":26911,"Ġuneven":26912,"ĠcafÃ©":26913,"Ġpersecut":26914,"ĠFoley":26915,"supportfaq":26916,"ĠMent":26917,"Ġtrash":26918,"Ġnoticeable":26919,"ĠEup":26920,"ipers":26921,"ĠLevant":26922,"Ġbizarre":26923,"ĠBaz":26924,"ĠGeelong":26925,"Ġcandy":26926,"Ġearthquakes":26927,"ĠAck":26928,"ĠEsper":26929,"osium":26930,"Âł5":26931,"Ġmidfield":26932,"ĠForty":26933,"Ce":26934,"Ġcaptains":26935,"Ġvigil":26936,"ĠPsal":26937,"Ġendurance":26938,"tus":26939,"ĠLED":26940,"ĠReconstruction":26941,"Read":26942,"ĠSke":26943,"ĠVest":26944,"Ġrendition":26945,"Ã©tÃ©":26946,"Ġunemployed":26947,"Ġmotives":26948,"ĠPunjabi":26949,"ĠFunk":26950,"anguages":26951,"garh":26952,"Ġreconciliation":26953,"lys":26954,"1947":26955,"ĠInitial":26956,"Ġplung":26957,"Ġcapsule":26958,"Ġinflicted":26959,"ĠEddy":26960,"Ġsenate":26961,"Ġsorrow":26962,"ĠWhip":26963,"akar":26964,"Ġcancel":26965,"Ġtowed":26966,"Ġgloves":26967,"ĠMonitor":26968,"Ġtransports":26969,"Ġroyalty":26970,"ĠYorker":26971,"ĠCrimson":26972,"ĠPomp":26973,"upa":26974,"Ġinviting":26975,"ĠEliot":26976,"Ġtightened":26977,"Ġinad":26978,"Ġlifts":26979,"Ġhay":26980,"ĠTF":26981,"ikan":26982,"ĠSkinner":26983,"Team":26984,"Ġglam":26985,"Ġmortal":26986,"kas":26987,"ĠVolk":26988,"Ġimplicit":26989,"Ġhurry":26990,"ĠReno":26991,"osia":26992,"Ġdomination":26993,"ĠWhig":26994,"Ã³s":26995,"Ġpitches":26996,"ĠAmbrose":26997,"terror":26998,"Ġretailer":26999,"Ġoverly":27000,"Â»":27001,"ĠTajik":27002,"Ġcontinents":27003,"ĠUSL":27004,"ĠNeu":27005,"hov":27006,"Ġcaretaker":27007,"awak":27008,"legged":27009,"ĠSecurities":27010,"Ġdisintegr":27011,"ĠSaturdays":27012,"Ġdisliked":27013,"priv":27014,"flu":27015,"ĠSheila":27016,"Ġtops":27017,"ĠJesuits":27018,"Ġfarewell":27019,"illac":27020,"health":27021,"Ġboarded":27022,"Ġhaunted":27023,"Ġnegotiating":27024,"ĠTyne":27025,"ĠMathematical":27026,"ĠAppalachian":27027,"iÃ¨re":27028,"inald":27029,"ĠCaliph":
[truncated: 395,043 more chars]
