# Supplementary material
Source: ML conference proceedings conference paper supplement (https://aclanthology.org/2020.findings-emnlp.419)
Supplement: OptionalSupplementaryMaterial [file 2020.findings-emnlp.419.OptionalSupplementaryMaterial.zip › AttentionGuidance-main/attention_guidance/examples/contrib/README.md]

# Community contributed examples

This folder contains examples which are not actively maintained (mostly contributed by the community).

Using these examples together with a recent version of the library usually requires to make small (sometimes big) adaptations to get the scripts working.
