# Supplementary material
Source: ML conference proceedings conference paper supplement (https://aclanthology.org/2020.findings-emnlp.419)
Supplement: OptionalSupplementaryMaterial [file 2020.findings-emnlp.419.OptionalSupplementaryMaterial.zip › AttentionGuidance-main/attention_guidance/examples/contrib/run_camembert.py]

import torch

from transformers.modeling_camembert import CamembertForMaskedLM
from transformers.tokenization_camembert import CamembertTokenizer


def fill_mask(masked_input, model, tokenizer, topk=5):
    # Adapted from https://github.com/pytorch/fairseq/blob/master/fairseq/models/roberta/hub_interface.py
    assert masked_input.count("<mask>") == 1
    input_ids = torch.tensor(tokenizer.encode(masked_input, add_special_tokens=True)).unsqueeze(0)  # Batch size 1
    logits = model(input_ids)[0]  # The last hidden-state is the first element of the output tuple
    masked_index = (input_ids.squeeze() == tokenizer.mask_token_id).nonzero().item()
    logits = logits[0, masked_index, :]
    prob = logits.softmax(dim=0)
    values, indices = prob.topk(k=topk, dim=0)
    topk_predicted_token_bpe = " ".join(
        [tokenizer.convert_ids_to_tokens(indices[i].item()) for i in range(len(indices))]
    )
    masked_token = tokenizer.mask_token
    topk_filled_outputs = []
    for index, predicted_token_bpe in enumerate(topk_predicted_token_bpe.split(" ")):
        predicted_token = predicted_token_bpe.replace("\u2581", " ")
        if " {0}".format(masked_token) in masked_input:
            topk_filled_outputs.append(
                (
                    masked_input.replace(" {0}".format(masked_token), predicted_token),
                    values[index].item(),
                    predicted_token,
                )
            )
        else:
            topk_filled_outputs.append(
                (masked_input.replace(masked_token, predicted_token), values[index].item(), predicted_token,)
            )
    return topk_filled_outputs


tokenizer = CamembertTokenizer.from_pretrained("camembert-base")
model = CamembertForMaskedLM.from_pretrained("camembert-base")
model.eval()

masked_input = "Le camembert est <mask> :)"
print(fill_mask(masked_input, model, tokenizer, topk=3))
