# Supplementary material
Source: ML conference proceedings conference paper supplement (https://aclanthology.org/2020.findings-emnlp.419)
Supplement: OptionalSupplementaryMaterial [file 2020.findings-emnlp.419.OptionalSupplementaryMaterial.zip › AttentionGuidance-main/attention_guidance/examples/contrib/run_openai_gpt.py]

# coding=utf-8
# Copyright 2018 Google AI, Google Brain and Carnegie Mellon University Authors and the HuggingFace Inc. team.
# Copyright (c) 2018, NVIDIA CORPORATION.  All rights reserved.
#
# Licensed under the Apache License, Version 2.0 (the "License");
# you may not use this file except in compliance with the License.
# You may obtain a copy of the License at
#
#     http://www.apache.org/licenses/LICENSE-2.0
#
# Unless required by applicable law or agreed to in writing, software
# distributed under the License is distributed on an "AS IS" BASIS,
# WITHOUT WARRANTIES OR CONDITIONS OF ANY KIND, either express or implied.
# See the License for the specific language governing permissions and
# limitations under the License.
""" OpenAI GPT model fine-tuning script.
    Adapted from https://github.com/huggingface/pytorch-openai-transformer-lm/blob/master/train.py
    It self adapted from https://github.com/openai/finetune-transformer-lm/blob/master/train.py

    This script with default values fine-tunes and evaluate a pretrained OpenAI GPT on the RocStories dataset:
        python run_openai_gpt.py \
          --model_name openai-gpt \
          --do_train \
          --do_eval \
          --train_dataset "$ROC_STORIES_DIR/cloze_test_val__spring2016 - cloze_test_ALL_val.csv" \
          --eval_dataset "$ROC_STORIES_DIR/cloze_test_test__spring2016 - cloze_test_ALL_test.csv" \
          --output_dir ../log \
          --train_batch_size 16 \
"""
import argparse
import csv
import logging
import os
import random

import numpy as np
import torch
from torch.utils.data import DataLoader, RandomSampler, SequentialSampler, TensorDataset
from tqdm import tqdm, trange

from transformers import (
    CONFIG_NAME,
    WEIGHTS_NAME,
    AdamW,
    OpenAIGPTDoubleHeadsModel,
    OpenAIGPTTokenizer,
    get_linear_schedule_with_warmup,
)


logging.basicConfig(
    format="%(asctime)s - %(levelname)s - %(name)s -   %(message)s", datefmt="%m/%d/%Y %H:%M:%S", level=logging.INFO
)
logger = logging.getLogger(__name__)


def accuracy(out, labels):
    outputs = np.argmax(out, axis=1)
    return np.sum(outputs == labels)


def load_rocstories_dataset(dataset_path):
    """ Output a list of tuples(story, 1st continuation, 2nd continuation, label) """
    with open(dataset_path, encoding="utf_8") as f:
        f = csv.reader(f)
        output = []
        next(f)  # skip the first line
        for line in tqdm(f):
            output.append((" ".join(line[1:5]), line[5], line[6], int(line[-1]) - 1))
    return output


def pre_process_datasets(encoded_datasets, input_len, cap_length, start_token, delimiter_token, clf_token):
    """ Pre-process datasets containing lists of tuples(story, 1st continuation, 2nd continuation, label)

        To Transformer inputs of shape (n_batch, n_alternative, length) comprising for each batch, continuation:
        input_ids[batch, alternative, :] = [start_token] + story[:cap_length] + [delimiter_token] + cont1[:cap_length] + [clf_token]
    """
    tensor_datasets = []
    for dataset in encoded_datasets:
        n_batch = len(dataset)
        input_ids = np.zeros((n_batch, 2, input_len), dtype=np.int64)
        mc_token_ids = np.zeros((n_batch, 2), dtype=np.int64)
        lm_labels = np.full((n_batch, 2, input_len), fill_value=-100, dtype=np.int64)
        mc_labels = np.zeros((n_batch,), dtype=np.int64)
        for i, (story, cont1, cont2, mc_label), in enumerate(dataset):
            with_cont1 = [start_token] + story[:cap_length] + [delimiter_token] + cont1[:cap_length] + [clf_token]
            with_cont2 = [start_token] + story[:cap_length] + [delimiter_token] + cont2[:cap_length] + [clf_token]
            input_ids[i, 0, : len(with_cont1)] = with_cont1
            input_ids[i, 1, : len(with_cont2)] = with_cont2
            mc_token_ids[i, 0] = len(with_cont1) - 1
            mc_token_ids[i, 1] = len(with_cont2) - 1
            lm_labels[i, 0, : len(with_cont1)] = with_cont1
            lm_labels[i, 1, : len(with_cont2)] = with_cont2
            mc_labels[i] = mc_label
        all_inputs = (input_ids, mc_token_ids, lm_labels, mc_labels)
        tensor_datasets.append(tuple(torch.tensor(t) for t in all_inputs))
    return tensor_datasets


def main():
    parser = argparse.ArgumentParser()
    parser.add_argument("--model_name", type=str, default="openai-gpt", help="pretrained model name")
    parser.add_argument("--do_train", action="store_true", help="Whether to run training.")
    parser.add_argument("--do_eval", action="store_true", help="Whether to run eval on the dev set.")
    parser.add_argument(
        "--output_dir",
        default=None,
        type=str,
        required=True,
        help="The output directory where the model predictions and checkpoints will be written.",
    )
    parser.add_argument("--train_dataset", type=str, default="")
    parser.add_argument("--eval_dataset", type=str, default="")
    parser.add_argument("--seed", type=int, default=42)
    parser.add_argument("--num_train_epochs", type=int, default=3)
    parser.add_argument("--train_batch_size", type=int, default=8)
    parser.add_argument("--eval_batch_size", type=int, default=16)
    parser.add_argument("--adam_epsilon", default=1e-8, type=float, help="Epsilon for Adam optimizer.")
    parser.add_argument("--max_grad_norm", type=int, default=1)
    parser.add_argument(
        "--max_steps",
        default=-1,
        type=int,
        help="If > 0: set total number of training \
                        steps to perform. Override num_train_epochs.",
    )
    parser.add_argument(
        "--gradient_accumulation_steps",
        type=int,
        default=1,
        help="Number of updates steps to accumulate before\
                        performing a backward/update pass.",
    )
    parser.add_argument("--learning_rate", type=float, default=6.25e-5)
    parser.add_argument("--warmup_steps", default=0, type=int, help="Linear warmup over warmup_steps.")
    parser.add_argument("--lr_schedule", type=str, default="warmup_linear")
    parser.add_argument("--weight_decay", type=float, default=0.01)
    parser.add_argument("--lm_coef", type=float, default=0.9)
    parser.add_argument("--n_valid", type=int, default=374)

    parser.add_argument("--server_ip", type=str, default="", help="Can be used for distant debugging.")
    parser.add_argument("--server_port", type=str, default="", help="Can be used for distant debugging.")
    args = parser.parse_args()
    print(args)

    if args.server_ip and args.server_port:
        # Distant debugging - see https://code.visualstudio.com/docs/python/debugging#_attach-to-a-local-script
        import ptvsd

        print("Waiting for debugger attach")
        ptvsd.enable_attach(address=(args.server_ip, args.server_port), redirect_output=True)
        ptvsd.wait_for_attach()

    random.seed(args.seed)
    np.random.seed(args.seed)
    torch.manual_seed(args.seed)
    torch.cuda.manual_seed_all(args.seed)

    device = torch.device("cuda" if torch.cuda.is_available() else "cpu")
    n_gpu = torch.cuda.device_count()
    logger.info("device: {}, n_gpu {}".format(device, n_gpu))

    if not args.do_train and not args.do_eval:
        raise ValueError("At least one of `do_train` or `do_eval` must be True.")

    if not os.path.exists(args.output_dir):
        os.makedirs(args.output_dir)

    # Load tokenizer and model
    # This loading functions also add new tokens and embeddings called `special tokens`
    # These new embeddings will be fine-tuned on the RocStories dataset
    special_tokens = ["_start_", "_delimiter_", "_classify_"]
    tokenizer = OpenAIGPTTokenizer.from_pretrained(args.model_name)
    tokenizer.add_tokens(special_tokens)
    special_tokens_ids = tokenizer.convert_tokens_to_ids(special_tokens)
    model = OpenAIGPTDoubleHeadsModel.from_pretrained(args.model_name)
    model.resize_token_embeddings(len(tokenizer))
    model.to(device)

    # Load and encode the datasets
    def tokenize_and_encode(obj):
        """ Tokenize and encode a nested object """
        if isinstance(obj, str):
            return tokenizer.convert_tokens_to_ids(tokenizer.tokenize(obj))
        elif isinstance(obj, int):
            return obj
        return list(tokenize_and_encode(o) for o in obj)

    logger.info("Encoding dataset...")
    train_dataset = load_rocstories_dataset(args.train_dataset)
    eval_dataset = load_rocstories_dataset(args.eval_dataset)
    datasets = (train_dataset, eval_dataset)
    encoded_datasets = tokenize_and_encode(datasets)

    # Compute the max input length for the Transformer
    max_length = model.config.n_positions // 2 - 2
    input_length = max(
        len(story[:max_length]) + max(len(cont1[:max_length]), len(cont2[:max_length])) + 3
        for dataset in encoded_datasets
        for story, cont1, cont2, _ in dataset
    )
    input_length = min(input_length, model.config.n_positions)  # Max size of input for the pre-trained model

    # Prepare inputs tensors and dataloaders
    tensor_datasets = pre_process_datasets(encoded_datasets, input_length, max_length, *special_tokens_ids)
    train_tensor_dataset, eval_tensor_dataset = tensor_datasets[0], tensor_datasets[1]

    train_data = TensorDataset(*train_tensor_dataset)
    train_sampler = RandomSampler(train_data)
    train_dataloader = DataLoader(train_data, sampler=train_sampler, batch_size=args.train_batch_size)

    eval_data = TensorDataset(*eval_tensor_dataset)
    eval_sampler = SequentialSampler(eval_data)
    eval_dataloader = DataLoader(eval_data, sampler=eval_sampler, batch_size=args.eval_batch_size)

    # Prepare optimizer
    if args.do_train:
        if args.max_steps > 0:
            t_total = args.max_steps
            args.num_train_epochs = args.max_steps // (len(train_dataloader) // args.gradient_accumulation_steps) + 1
        else:
            t_total = len(train_dataloader) // args.gradient_accumulation_steps * args.num_train_epochs

        param_optimizer = list(model.named_parameters())
        no_decay = ["bias", "LayerNorm.bias", "LayerNorm.weight"]
        optimizer_grouped_parameters = [
            {
                "params": [p for n, p in param_optimizer if not any(nd in n for nd in no_decay)],
                "weight_decay": args.weight_decay,
            },
            {"params": [p for n, p in param_optimizer if any(nd in n for nd in no_decay)], "weight_decay": 0.0},
        ]
        optimizer = AdamW(optimizer_grouped_parameters, lr=args.learning_rate, eps=args.adam_epsilon)
        scheduler = get_linear_schedule_with_warmup(
            optimizer, num_warmup_steps=args.warmup_steps, num_training_steps=t_total
        )

    if args.do_train:
        nb_tr_steps, tr_loss, exp_average_loss = 0, 0, None
        model.train()
        for _ in trange(int(args.num_train_epochs), desc="Epoch"):
            tr_loss = 0
            nb_tr_steps = 0
            tqdm_bar = tqdm(train_dataloader, desc="Training")
            for step, batch in enumerate(tqdm_bar):
                batch = tuple(t.to(device) for t in batch)
                input_ids, mc_token_ids, lm_labels, mc_labels = batch
                losses = model(input_ids, mc_token_ids=mc_token_ids, lm_labels=lm_labels, mc_labels=mc_labels)
                loss = args.lm_coef * losses[0] + losses[1]
                loss.backward()
                optimizer.step()
                scheduler.step()
                optimizer.zero_grad()
                tr_loss += loss.item()
                exp_average_loss = (
                    loss.item() if exp_average_loss is None else 0.7 * exp_average_loss + 0.3 * loss.item()
                )
                nb_tr_steps += 1
                tqdm_bar.desc = "Training loss: {:.2e} lr: {:.2e}".format(exp_average_loss, scheduler.get_lr()[0])

    # Save a trained model
    if args.do_train:
        # Save a trained model, configuration and tokenizer
        model_to_save = model.module if hasattr(model, "module") else model  # Only save the model itself

        # If we save using the predefined names, we can load using `from_pretrained`
        output_model_file = os.path.join(args.output_dir, WEIGHTS_NAME)
        output_config_file = os.path.join(args.output_dir, CONFIG_NAME)

        torch.save(model_to_save.state_dict(), output_model_file)
        model_to_save.config.to_json_file(output_config_file)
        tokenizer.save_vocabulary(args.output_dir)

        # Load a trained model and vocabulary that you have fine-tuned
        model = OpenAIGPTDoubleHeadsModel.from_pretrained(args.output_dir)
        tokenizer = OpenAIGPTTokenizer.from_pretrained(args.output_dir)
        model.to(device)

    if args.do_eval:
        model.eval()
        eval_loss, eval_accuracy = 0, 0
        nb_eval_steps, nb_eval_examples = 0, 0
        for batch in tqdm(eval_dataloader, desc="Evaluating"):
            batch = tuple(t.to(device) for t in batch)
            input_ids, mc_token_ids, lm_labels, mc_labels = batch
            with torch.no_grad():
                _, mc_loss, _, mc_logits = model(
                    input_ids, mc_token_ids=mc_token_ids, lm_labels=lm_labels, mc_labels=mc_labels
                )

            mc_logits = mc_logits.detach().cpu().numpy()
            mc_labels = mc_labels.to("cpu").numpy()
            tmp_eval_accuracy = accuracy(mc_logits, mc_labels)

            eval_loss += mc_loss.mean().item()
            eval_accuracy += tmp_eval_accuracy

            nb_eval_examples += input_ids.size(0)
            nb_eval_steps += 1

        eval_loss = eval_loss / nb_eval_steps
        eval_accuracy = eval_accuracy / nb_eval_examples
        train_loss = tr_loss / nb_tr_steps if args.do_train else None
        result = {"eval_loss": eval_loss, "eval_accuracy": eval_accuracy, "train_loss": train_loss}

        output_eval_file = os.path.join(args.output_dir, "eval_results.txt")
        with open(output_eval_file, "w") as writer:
            logger.info("***** Eval results *****")
            for key in sorted(result.keys()):
                logger.info("  %s = %s", key, str(result[key]))
                writer.write("%s = %s\n" % (key, str(result[key])))


if __name__ == "__main__":
    main()
