# Supplementary material
Source: ML conference proceedings conference paper supplement (https://aclanthology.org/2020.findings-emnlp.419)
Supplement: OptionalSupplementaryMaterial [file 2020.findings-emnlp.419.OptionalSupplementaryMaterial.zip › AttentionGuidance-main/attention_guidance/examples/distillation/requirements.txt]

transformers

gitpython==3.0.2
tensorboard>=1.14.0
tensorboardX==1.8
psutil==5.6.6
scipy==1.3.1
