# Supplementary material
Source: ML conference proceedings conference paper supplement (https://aclanthology.org/2020.findings-emnlp.419)
Supplement: OptionalSupplementaryMaterial [file 2020.findings-emnlp.419.OptionalSupplementaryMaterial.zip › AttentionGuidance-main/attention_guidance/examples/summarization/finetune_bart_tiny.sh]

# Script for verifying that run_bart_sum can be invoked from its directory

# Get tiny dataset with cnn_dm format (4 examples for train, val, test)
wget https://s3.amazonaws.com/datasets.huggingface.co/summarization/cnn_tiny.tgz
tar -xzvf cnn_tiny.tgz
rm cnn_tiny.tgz

export OUTPUT_DIR_NAME=bart_utest_output
export CURRENT_DIR=${PWD}
export OUTPUT_DIR=${CURRENT_DIR}/${OUTPUT_DIR_NAME}

# Make output directory if it doesn't exist
mkdir -p $OUTPUT_DIR

# Add parent directory to python path to access lightning_base.py and utils.py
export PYTHONPATH="../":"${PYTHONPATH}"
python finetune.py \
--data_dir=cnn_tiny/ \
--model_type=bart \
--model_name_or_path=sshleifer/bart-tiny-random \
--learning_rate=3e-5 \
--train_batch_size=2 \
--eval_batch_size=2 \
--output_dir=$OUTPUT_DIR \
--num_train_epochs=1  \
--n_gpu=0 \
--do_train $@

rm -rf cnn_tiny
rm -rf $OUTPUT_DIR
