# Supplementary material
Source: ML conference proceedings conference paper supplement (https://aclanthology.org/2020.findings-emnlp.419)
Supplement: OptionalSupplementaryMaterial [file 2020.findings-emnlp.419.OptionalSupplementaryMaterial.zip › AttentionGuidance-main/attention_guidance/examples/token-classification/utils_ner.py]

# coding=utf-8
# Copyright 2018 The Google AI Language Team Authors and The HuggingFace Inc. team.
# Copyright (c) 2018, NVIDIA CORPORATION.  All rights reserved.
#
# Licensed under the Apache License, Version 2.0 (the "License");
# you may not use this file except in compliance with the License.
# You may obtain a copy of the License at
#
#     http://www.apache.org/licenses/LICENSE-2.0
#
# Unless required by applicable law or agreed to in writing, software
# distributed under the License is distributed on an "AS IS" BASIS,
# WITHOUT WARRANTIES OR CONDITIONS OF ANY KIND, either express or implied.
# See the License for the specific language governing permissions and
# limitations under the License.
""" Named entity recognition fine-tuning: utilities to work with CoNLL-2003 task. """


import logging
import os
from dataclasses import dataclass
from enum import Enum
from typing import List, Optional, Union

from filelock import FileLock

from transformers import PreTrainedTokenizer, is_tf_available, is_torch_available


logger = logging.getLogger(__name__)


@dataclass
class InputExample:
    """
    A single training/test example for token classification.

    Args:
        guid: Unique id for the example.
        words: list. The words of the sequence.
        labels: (Optional) list. The labels for each word of the sequence. This should be
        specified for train and dev examples, but not for test examples.
    """

    guid: str
    words: List[str]
    labels: Optional[List[str]]


@dataclass
class InputFeatures:
    """
    A single set of features of data.
    Property names are the same names as the corresponding inputs to a model.
    """

    input_ids: List[int]
    attention_mask: List[int]
    token_type_ids: Optional[List[int]] = None
    label_ids: Optional[List[int]] = None


class Split(Enum):
    train = "train"
    dev = "dev"
    test = "test"


if is_torch_available():
    import torch
    from torch import nn
    from torch.utils.data.dataset import Dataset

    class NerDataset(Dataset):
        """
        This will be superseded by a framework-agnostic approach
        soon.
        """

        features: List[InputFeatures]
        pad_token_label_id: int = nn.CrossEntropyLoss().ignore_index
        # Use cross entropy ignore_index as padding label id so that only
        # real label ids contribute to the loss later.

        def __init__(
            self,
            data_dir: str,
            tokenizer: PreTrainedTokenizer,
            labels: List[str],
            model_type: str,
            max_seq_length: Optional[int] = None,
            overwrite_cache=False,
            mode: Split = Split.train,
        ):
            # Load data features from cache or dataset file
            cached_features_file = os.path.join(
                data_dir, "cached_{}_{}_{}".format(mode.value, tokenizer.__class__.__name__, str(max_seq_length)),
            )

            # Make sure only the first process in distributed training processes the dataset,
            # and the others will use the cache.
            lock_path = cached_features_file + ".lock"
            with FileLock(lock_path):

                if os.path.exists(cached_features_file) and not overwrite_cache:
                    logger.info(f"Loading features from cached file {cached_features_file}")
                    self.features = torch.load(cached_features_file)
                else:
                    logger.info(f"Creating features from dataset file at {data_dir}")
                    examples = read_examples_from_file(data_dir, mode)
                    # TODO clean up all this to leverage built-in features of tokenizers
                    self.features = convert_examples_to_features(
                        examples,
                        labels,
                        max_seq_length,
                        tokenizer,
                        cls_token_at_end=bool(model_type in ["xlnet"]),
                        # xlnet has a cls token at the end
                        cls_token=tokenizer.cls_token,
                        cls_token_segment_id=2 if model_type in ["xlnet"] else 0,
                        sep_token=tokenizer.sep_token,
                        sep_token_extra=False,
                        # roberta uses an extra separator b/w pairs of sentences, cf. github.com/pytorch/fairseq/commit/1684e166e3da03f5b600dbb7855cb98ddfcd0805
                        pad_on_left=bool(tokenizer.padding_side == "left"),
                        pad_token=tokenizer.pad_token_id,
                        pad_token_segment_id=tokenizer.pad_token_type_id,
                        pad_token_label_id=self.pad_token_label_id,
                    )
                    logger.info(f"Saving features into cached file {cached_features_file}")
                    torch.save(self.features, cached_features_file)

        def __len__(self):
            return len(self.features)

        def __getitem__(self, i) -> InputFeatures:
            return self.features[i]


if is_tf_available():
    import tensorflow as tf

    class TFNerDataset:
        """
        This will be superseded by a framework-agnostic approach
        soon.
        """

        features: List[InputFeatures]
        pad_token_label_id: int = -1
        # Use cross entropy ignore_index as padding label id so that only
        # real label ids contribute to the loss later.

        def __init__(
            self,
            data_dir: str,
            tokenizer: PreTrainedTokenizer,
            labels: List[str],
            model_type: str,
            max_seq_length: Optional[int] = None,
            overwrite_cache=False,
            mode: Split = Split.train,
        ):
            examples = read_examples_from_file(data_dir, mode)
            # TODO clean up all this to leverage built-in features of tokenizers
            self.features = convert_examples_to_features(
                examples,
                labels,
                max_seq_length,
                tokenizer,
                cls_token_at_end=bool(model_type in ["xlnet"]),
                # xlnet has a cls token at the end
                cls_token=tokenizer.cls_token,
                cls_token_segment_id=2 if model_type in ["xlnet"] else 0,
                sep_token=tokenizer.sep_token,
                sep_token_extra=False,
                # roberta uses an extra separator b/w pairs of sentences, cf. github.com/pytorch/fairseq/commit/1684e166e3da03f5b600dbb7855cb98ddfcd0805
                pad_on_left=bool(tokenizer.padding_side == "left"),
                pad_token=tokenizer.pad_token_id,
                pad_token_segment_id=tokenizer.pad_token_type_id,
                pad_token_label_id=self.pad_token_label_id,
            )

            def gen():
                for ex in self.features:
                    if ex.token_type_ids is None:
                        yield (
                            {"input_ids": ex.input_ids, "attention_mask": ex.attention_mask},
                            ex.label_ids,
                        )
                    else:
                        yield (
                            {
                                "input_ids": ex.input_ids,
                                "attention_mask": ex.attention_mask,
                                "token_type_ids": ex.token_type_ids,
                            },
                            ex.label_ids,
                        )

            if "token_type_ids" not in tokenizer.model_input_names:
                self.dataset = tf.data.Dataset.from_generator(
                    gen,
                    ({"input_ids": tf.int32, "attention_mask": tf.int32}, tf.int64),
                    (
                        {"input_ids": tf.TensorShape([None]), "attention_mask": tf.TensorShape([None])},
                        tf.TensorShape([None]),
                    ),
                )
            else:
                self.dataset = tf.data.Dataset.from_generator(
                    gen,
                    ({"input_ids": tf.int32, "attention_mask": tf.int32, "token_type_ids": tf.int32}, tf.int64),
                    (
                        {
                            "input_ids": tf.TensorShape([None]),
                            "attention_mask": tf.TensorShape([None]),
                            "token_type_ids": tf.TensorShape([None]),
                        },
                        tf.TensorShape([None]),
                    ),
                )

        def get_dataset(self):
            return self.dataset

        def __len__(self):
            return len(self.features)

        def __getitem__(self, i) -> InputFeatures:
            return self.features[i]


def read_examples_from_file(data_dir, mode: Union[Split, str]) -> List[InputExample]:
    if isinstance(mode, Split):
        mode = mode.value
    file_path = os.path.join(data_dir, f"{mode}.txt")
    guid_index = 1
    examples = []
    with open(file_path, encoding="utf-8") as f:
        words = []
        labels = []
        for line in f:
            if line.startswith("-DOCSTART-") or line == "" or line == "\n":
                if words:
                    examples.append(InputExample(guid=f"{mode}-{guid_index}", words=words, labels=labels))
                    guid_index += 1
                    words = []
                    labels = []
            else:
                splits = line.split(" ")
                words.append(splits[0])
                if len(splits) > 1:
                    labels.append(splits[-1].replace("\n", ""))
                else:
                    # Examples could have no label for mode = "test"
                    labels.append("O")
        if words:
            examples.append(InputExample(guid=f"{mode}-{guid_index}", words=words, labels=labels))
    return examples


def convert_examples_to_features(
    examples: List[InputExample],
    label_list: List[str],
    max_seq_length: int,
    tokenizer: PreTrainedTokenizer,
    cls_token_at_end=False,
    cls_token="[CLS]",
    cls_token_segment_id=1,
    sep_token="[SEP]",
    sep_token_extra=False,
    pad_on_left=False,
    pad_token=0,
    pad_token_segment_id=0,
    pad_token_label_id=-100,
    sequence_a_segment_id=0,
    mask_padding_with_zero=True,
) -> List[InputFeatures]:
    """ Loads a data file into a list of `InputFeatures`
        `cls_token_at_end` define the location of the CLS token:
            - False (Default, BERT/XLM pattern): [CLS] + A + [SEP] + B + [SEP]
            - True (XLNet/GPT pattern): A + [SEP] + B + [SEP] + [CLS]
        `cls_token_segment_id` define the segment id associated to the CLS token (0 for BERT, 2 for XLNet)
    """
    # TODO clean up all this to leverage built-in features of tokenizers

    label_map = {label: i for i, label in enumerate(label_list)}

    features = []
    for (ex_index, example) in enumerate(examples):
        if ex_index % 10_000 == 0:
            logger.info("Writing example %d of %d", ex_index, len(examples))

        tokens = []
        label_ids = []
        for word, label in zip(example.words, example.labels):
            word_tokens = tokenizer.tokenize(word)

            # bert-base-multilingual-cased sometimes output "nothing ([]) when calling tokenize with just a space.
            if len(word_tokens) > 0:
                tokens.extend(word_tokens)
                # Use the real label id for the first token of the word, and padding ids for the remaining tokens
                label_ids.extend([label_map[label]] + [pad_token_label_id] * (len(word_tokens) - 1))

        # Account for [CLS] and [SEP] with "- 2" and with "- 3" for RoBERTa.
        special_tokens_count = tokenizer.num_special_tokens_to_add()
        if len(tokens) > max_seq_length - special_tokens_count:
            tokens = tokens[: (max_seq_length - special_tokens_count)]
            label_ids = label_ids[: (max_seq_length - special_tokens_count)]

        # The convention in BERT is:
        # (a) For sequence pairs:
        #  tokens:   [CLS] is this jack ##son ##ville ? [SEP] no it is not . [SEP]
        #  type_ids:   0   0  0    0    0     0       0   0   1  1  1  1   1   1
        # (b) For single sequences:
        #  tokens:   [CLS] the dog is hairy . [SEP]
        #  type_ids:   0   0   0   0  0     0   0
        #
        # Where "type_ids" are used to indicate whether this is the first
        # sequence or the second sequence. The embedding vectors for `type=0` and
        # `type=1` were learned during pre-training and are added to the wordpiece
        # embedding vector (and position vector). This is not *strictly* necessary
        # since the [SEP] token unambiguously separates the sequences, but it makes
        # it easier for the model to learn the concept of sequences.
        #
        # For classification tasks, the first vector (corresponding to [CLS]) is
        # used as as the "sentence vector". Note that this only makes sense because
        # the entire model is fine-tuned.
        tokens += [sep_token]
        label_ids += [pad_token_label_id]
        if sep_token_extra:
            # roberta uses an extra separator b/w pairs of sentences
            tokens += [sep_token]
            label_ids += [pad_token_label_id]
        segment_ids = [sequence_a_segment_id] * len(tokens)

        if cls_token_at_end:
            tokens += [cls_token]
            label_ids += [pad_token_label_id]
            segment_ids += [cls_token_segment_id]
        else:
            tokens = [cls_token] + tokens
            label_ids = [pad_token_label_id] + label_ids
            segment_ids = [cls_token_segment_id] + segment_ids

        input_ids = tokenizer.convert_tokens_to_ids(tokens)

        # The mask has 1 for real tokens and 0 for padding tokens. Only real
        # tokens are attended to.
        input_mask = [1 if mask_padding_with_zero else 0] * len(input_ids)

        # Zero-pad up to the sequence length.
        padding_length = max_seq_length - len(input_ids)
        if pad_on_left:
            input_ids = ([pad_token] * padding_length) + input_ids
            input_mask = ([0 if mask_padding_with_zero else 1] * padding_length) + input_mask
            segment_ids = ([pad_token_segment_id] * padding_length) + segment_ids
            label_ids = ([pad_token_label_id] * padding_length) + label_ids
        else:
            input_ids += [pad_token] * padding_length
            input_mask += [0 if mask_padding_with_zero else 1] * padding_length
            segment_ids += [pad_token_segment_id] * padding_length
            label_ids += [pad_token_label_id] * padding_length

        assert len(input_ids) == max_seq_length
        assert len(input_mask) == max_seq_length
        assert len(segment_ids) == max_seq_length
        assert len(label_ids) == max_seq_length

        if ex_index < 5:
            logger.info("*** Example ***")
            logger.info("guid: %s", example.guid)
            logger.info("tokens: %s", " ".join([str(x) for x in tokens]))
            logger.info("input_ids: %s", " ".join([str(x) for x in input_ids]))
            logger.info("input_mask: %s", " ".join([str(x) for x in input_mask]))
            logger.info("segment_ids: %s", " ".join([str(x) for x in segment_ids]))
            logger.info("label_ids: %s", " ".join([str(x) for x in label_ids]))

        if "token_type_ids" not in tokenizer.model_input_names:
            segment_ids = None

        features.append(
            InputFeatures(
                input_ids=input_ids, attention_mask=input_mask, token_type_ids=segment_ids, label_ids=label_ids
            )
        )
    return features


def get_labels(path: str) -> List[str]:
    if path:
        with open(path, "r") as f:
            labels = f.read().splitlines()
        if "O" not in labels:
            labels = ["O"] + labels
        return labels
    else:
        return ["O", "B-MISC", "I-MISC", "B-PER", "I-PER", "B-ORG", "I-ORG", "B-LOC", "I-LOC"]
