# Supplementary material
Source: ML conference proceedings conference paper supplement (https://aclanthology.org/2020.findings-emnlp.419)
Supplement: OptionalSupplementaryMaterial [file 2020.findings-emnlp.419.OptionalSupplementaryMaterial.zip › AttentionGuidance-main/attention_guidance/requirements/environment.yml]

name: ag_lm
channels:
  - pytorch
  - defaults
dependencies:
  - _libgcc_mutex=0.1=main
  - blas=1.0=mkl
  - ca-certificates=2020.1.1=0
  - certifi=2020.4.5.1=py36_0
  - cudatoolkit=10.1.243=h6bb024c_0
  - freetype=2.9.1=h8a8886c_1
  - intel-openmp=2020.1=217
  - jpeg=9b=h024ee3a_2
  - ld_impl_linux-64=2.33.1=h53a641e_7
  - libedit=3.1.20181209=hc058e9b_0
  - libffi=3.3=he6710b0_1
  - libgcc-ng=9.1.0=hdf63c60_0
  - libgfortran-ng=7.3.0=hdf63c60_0
  - libpng=1.6.37=hbc83047_0
  - libstdcxx-ng=9.1.0=hdf63c60_0
  - libtiff=4.1.0=h2733197_1
  - lz4-c=1.9.2=he6710b0_0
  - mkl=2020.1=217
  - mkl-service=2.3.0=py36he904b0f_0
  - mkl_fft=1.0.15=py36ha843d7b_0
  - mkl_random=1.1.1=py36h0573a6f_0
  - ncurses=6.2=he6710b0_1
  - ninja=1.9.0=py36hfd86e86_0
  - numpy-base=1.18.1=py36hde5b4d6_1
  - olefile=0.46=py36_0
  - openssl=1.1.1g=h7b6447c_0
  - pillow=7.1.2=py36hb39fc2d_0
  - pip=20.0.2=py36_3
  - python=3.6.10=h7579374_2
  - pytorch=1.5.0=py3.6_cuda10.1.243_cudnn7.6.3_0
  - readline=8.0=h7b6447c_0
  - setuptools=47.1.1=py36_0
  - six=1.15.0=py_0
  - sqlite=3.31.1=h62c20be_1
  - tk=8.6.8=hbc83047_0
  - torchvision=0.6.0=py36_cu101
  - wheel=0.34.2=py36_0
  - xz=5.2.5=h7b6447c_0
  - zlib=1.2.11=h7b6447c_3
  - zstd=1.4.4=h0b5b093_3
  - pip:
    - chardet==3.0.4
    - click==7.1.2
    - configparser==5.0.0
    - dataclasses==0.7
    - docker-pycreds==0.4.0
    - filelock==3.0.12
    - gitdb==4.0.5
    - gitpython==3.1.3
    - gql==0.2.0
    - graphql-core==1.1
    - idna==2.9
    - joblib==0.15.1
    - numpy==1.18.5
    - nvidia-ml-py3==7.352.0
    - packaging==20.4
    - pathtools==0.1.2
    - promise==2.3
    - psutil==5.7.0
    - pyparsing==2.4.7
    - python-dateutil==2.8.1
    - pyyaml==5.3.1
    - regex==2020.6.8
    - requests==2.23.0
    - sacremoses==0.0.43
    - sentencepiece==0.1.91
    - sentry-sdk==0.14.4
    - shortuuid==1.0.1
    - smmap==3.0.4
    - subprocess32==3.5.4
    - tokenizers==0.7.0
    - tqdm==4.46.1
    - urllib3==1.25.9
    - wandb==0.9.1
    - watchdog==0.10.2
