# Supplementary material
Source: ML conference proceedings conference paper supplement (https://aclanthology.org/2020.findings-emnlp.419)
Supplement: OptionalSupplementaryMaterial [file 2020.findings-emnlp.419.OptionalSupplementaryMaterial.zip › AttentionGuidance-main/attention_guidance/scripts/download_wikitext.sh]

wget https://s3.amazonaws.com/research.metamind.io/wikitext/wikitext-103-v1.zip
unzip -d data/ wikitext-103-v1.zip
rm wikitext-103-v1.zip
