# Supplementary material
Source: ML conference proceedings conference paper supplement (https://aclanthology.org/2020.findings-emnlp.419)
Supplement: OptionalSupplementaryMaterial [file 2020.findings-emnlp.419.OptionalSupplementaryMaterial.zip › AttentionGuidance-main/attention_guidance/src/transformers/configuration_roberta.py]

# coding=utf-8
# Copyright 2018 The Google AI Language Team Authors and The HuggingFace Inc. team.
# Copyright (c) 2018, NVIDIA CORPORATION.  All rights reserved.
#
# Licensed under the Apache License, Version 2.0 (the "License");
# you may not use this file except in compliance with the License.
# You may obtain a copy of the License at
#
#     http://www.apache.org/licenses/LICENSE-2.0
#
# Unless required by applicable law or agreed to in writing, software
# distributed under the License is distributed on an "AS IS" BASIS,
# WITHOUT WARRANTIES OR CONDITIONS OF ANY KIND, either express or implied.
# See the License for the specific language governing permissions and
# limitations under the License.
""" RoBERTa configuration """


import logging

from .configuration_bert import BertConfig


logger = logging.getLogger(__name__)

ROBERTA_PRETRAINED_CONFIG_ARCHIVE_MAP = {
    "roberta-base": "https://s3.amazonaws.com/models.huggingface.co/bert/roberta-base-config.json",
    "roberta-large": "https://s3.amazonaws.com/models.huggingface.co/bert/roberta-large-config.json",
    "roberta-large-mnli": "https://s3.amazonaws.com/models.huggingface.co/bert/roberta-large-mnli-config.json",
    "distilroberta-base": "https://s3.amazonaws.com/models.huggingface.co/bert/distilroberta-base-config.json",
    "roberta-base-openai-detector": "https://s3.amazonaws.com/models.huggingface.co/bert/roberta-base-openai-detector-config.json",
    "roberta-large-openai-detector": "https://s3.amazonaws.com/models.huggingface.co/bert/roberta-large-openai-detector-config.json",
}


class RobertaConfig(BertConfig):
    r"""
        This is the configuration class to store the configuration of a :class:`~transformers.RobertaModel`.
        It is used to instantiate an RoBERTa model according to the specified arguments, defining the model
        architecture. Instantiating a configuration with the defaults will yield a similar configuration to that of
        the BERT `bert-base-uncased <https://huggingface.co/bert-base-uncased>`__ architecture.

        Configuration objects inherit from  :class:`~transformers.PretrainedConfig` and can be used
        to control the model outputs. Read the documentation from  :class:`~transformers.PretrainedConfig`
        for more information.

        The :class:`~transformers.RobertaConfig` class directly inherits :class:`~transformers.BertConfig`.
        It reuses the same defaults. Please check the parent class for more information.

        Example::

            from transformers import RobertaConfig, RobertaModel

            # Initializing a RoBERTa configuration
            configuration = RobertaConfig()

            # Initializing a model from the configuration
            model = RobertaModel(configuration)

            # Accessing the model configuration
            configuration = model.config
    """
    model_type = "roberta"

    def __init__(self, pad_token_id=1, bos_token_id=0, eos_token_id=2, **kwargs):
        """Constructs RobertaConfig.
        """
        super().__init__(pad_token_id=pad_token_id, bos_token_id=bos_token_id, eos_token_id=eos_token_id, **kwargs)
