# Supplementary material
Source: ML conference proceedings conference paper supplement (https://aclanthology.org/2020.findings-emnlp.419)
Supplement: OptionalSupplementaryMaterial [file 2020.findings-emnlp.419.OptionalSupplementaryMaterial.zip › AttentionGuidance-main/attention_guidance/src/transformers/convert_dialogpt_original_pytorch_checkpoint_to_pytorch.py]

import argparse
import os

import torch

from transformers.file_utils import WEIGHTS_NAME


DIALOGPT_MODELS = ["small", "medium", "large"]

OLD_KEY = "lm_head.decoder.weight"
NEW_KEY = "lm_head.weight"


def convert_dialogpt_checkpoint(checkpoint_path: str, pytorch_dump_folder_path: str):
    d = torch.load(checkpoint_path)
    d[NEW_KEY] = d.pop(OLD_KEY)
    os.makedirs(pytorch_dump_folder_path, exist_ok=True)
    torch.save(d, os.path.join(pytorch_dump_folder_path, WEIGHTS_NAME))


if __name__ == "__main__":
    parser = argparse.ArgumentParser()
    parser.add_argument("--dialogpt_path", default=".", type=str)
    args = parser.parse_args()
    for MODEL in DIALOGPT_MODELS:
        checkpoint_path = os.path.join(args.dialogpt_path, f"{MODEL}_ft.pkl")
        pytorch_dump_folder_path = f"./DialoGPT-{MODEL}"
        convert_dialogpt_checkpoint(
            checkpoint_path, pytorch_dump_folder_path,
        )
