# Supplementary material
Source: ML conference proceedings conference paper supplement (https://aclanthology.org/2020.findings-emnlp.419)
Supplement: OptionalSupplementaryMaterial [file 2020.findings-emnlp.419.OptionalSupplementaryMaterial.zip › AttentionGuidance-main/attention_guidance/src/transformers/modeling_longformer.py]

# coding=utf-8
# Copyright 2020 The Allen Institute for AI team and The HuggingFace Inc. team.
#
# Licensed under the Apache License, Version 2.0 (the "License");
# you may not use this file except in compliance with the License.
# You may obtain a copy of the License at
#
#     http://www.apache.org/licenses/LICENSE-2.0
#
# Unless required by applicable law or agreed to in writing, software
# distributed under the License is distributed on an "AS IS" BASIS,
# WITHOUT WARRANTIES OR CONDITIONS OF ANY KIND, either express or implied.
# See the License for the specific language governing permissions and
# limitations under the License.
"""PyTorch Longformer model. """

import logging
import math
import warnings

import torch
import torch.nn as nn
from torch.nn import CrossEntropyLoss, MSELoss
from torch.nn import functional as F

from .configuration_longformer import LongformerConfig
from .file_utils import add_start_docstrings, add_start_docstrings_to_callable
from .modeling_bert import BertPreTrainedModel
from .modeling_roberta import RobertaLMHead, RobertaModel


logger = logging.getLogger(__name__)

LONGFORMER_PRETRAINED_MODEL_ARCHIVE_LIST = [
    "allenai/longformer-base-4096",
    "allenai/longformer-large-4096",
    "allenai/longformer-large-4096-finetuned-triviaqa",
    "allenai/longformer-base-4096-extra.pos.embd.only",
    "allenai/longformer-large-4096-extra.pos.embd.only",
    # See all Longformer models at https://huggingface.co/models?filter=longformer
]


def _get_question_end_index(input_ids, sep_token_id):
    """
        Computes the index of the first occurance of `sep_token_id`.
    """

    sep_token_indices = (input_ids == sep_token_id).nonzero()
    batch_size = input_ids.shape[0]

    assert sep_token_indices.shape[1] == 2, "`input_ids` should have two dimensions"
    assert (
        sep_token_indices.shape[0] == 3 * batch_size
    ), f"There should be exactly three separator tokens: {sep_token_id} in every sample for questions answering. You might also consider to set `global_attention_mask` manually in the forward function to avoid this error."

    return sep_token_indices.view(batch_size, 3, 2)[:, 0, 1]


def _compute_global_attention_mask(input_ids, sep_token_id, before_sep_token=True):
    """
        Computes global attention mask by putting attention on all tokens
        before `sep_token_id` if `before_sep_token is True` else after
        `sep_token_id`.
    """

    question_end_index = _get_question_end_index(input_ids, sep_token_id)
    question_end_index = question_end_index.unsqueeze(dim=1)  # size: batch_size x 1
    # bool attention mask with True in locations of global attention
    attention_mask = torch.arange(input_ids.shape[1], device=input_ids.device)
    if before_sep_token is True:
        attention_mask = (attention_mask.expand_as(input_ids) < question_end_index).to(torch.uint8)
    else:
        # last token is separation token and should not be counted and in the middle are two separation tokens
        attention_mask = (attention_mask.expand_as(input_ids) > (question_end_index + 1)).to(torch.uint8) * (
            attention_mask.expand_as(input_ids) < input_ids.shape[-1]
        ).to(torch.uint8)

    return attention_mask


class LongformerSelfAttention(nn.Module):
    def __init__(self, config, layer_id):
        super().__init__()
        if config.hidden_size % config.num_attention_heads != 0:
            raise ValueError(
                "The hidden size (%d) is not a multiple of the number of attention "
                "heads (%d)" % (config.hidden_size, config.num_attention_heads)
            )
        self.num_heads = config.num_attention_heads
        self.head_dim = int(config.hidden_size / config.num_attention_heads)
        self.embed_dim = config.hidden_size

        self.query = nn.Linear(config.hidden_size, self.embed_dim)
        self.key = nn.Linear(config.hidden_size, self.embed_dim)
        self.value = nn.Linear(config.hidden_size, self.embed_dim)

        # separate projection layers for tokens with global attention
        self.query_global = nn.Linear(config.hidden_size, self.embed_dim)
        self.key_global = nn.Linear(config.hidden_size, self.embed_dim)
        self.value_global = nn.Linear(config.hidden_size, self.embed_dim)

        self.dropout = config.attention_probs_dropout_prob

        self.layer_id = layer_id
        attention_window = config.attention_window[self.layer_id]
        assert (
            attention_window % 2 == 0
        ), f"`attention_window` for layer {self.layer_id} has to be an even value. Given {attention_window}"
        assert (
            attention_window > 0
        ), f"`attention_window` for layer {self.layer_id} has to be positive. Given {attention_window}"

        self.one_sided_attention_window_size = attention_window // 2

    @staticmethod
    def _skew(x, direction):
        """Convert diagonals into columns (or columns into diagonals depending on `direction`"""
        x_padded = F.pad(x, direction)  # padding value is not important because it will be overwritten
        x_padded = x_padded.view(*x_padded.size()[:-2], x_padded.size(-1), x_padded.size(-2))
        return x_padded

    @staticmethod
    def _skew2(x):
        """shift every row 1 step to right converting columns into diagonals"""
        # X = B x C x M x L
        B, C, M, L = x.size()
        x = F.pad(x, (0, M + 1))  # B x C x M x (L+M+1). Padding value is not important because it'll be overwritten
        x = x.view(B, C, -1)  # B x C x ML+MM+M
        x = x[:, :, :-M]  # B x C x ML+MM
        x = x.view(B, C, M, M + L)  # B x C, M x L+M
        x = x[:, :, :, :-1]
        return x

    @staticmethod
    def _chunk(x, w):
        """convert into overlapping chunkings. Chunk size = 2w, overlap size = w"""

        # non-overlapping chunks of size = 2w
        x = x.view(x.size(0), x.size(1) // (w * 2), w * 2, x.size(2))

        # use `as_strided` to make the chunks overlap with an overlap size = w
        chunk_size = list(x.size())
        chunk_size[1] = chunk_size[1] * 2 - 1

        chunk_stride = list(x.stride())
        chunk_stride[1] = chunk_stride[1] // 2
        return x.as_strided(size=chunk_size, stride=chunk_stride)

    def _mask_invalid_locations(self, input_tensor, w) -> torch.Tensor:
        affected_seqlen = w
        beginning_mask_2d = input_tensor.new_ones(w, w + 1).tril().flip(dims=[0])
        beginning_mask = beginning_mask_2d[None, :, None, :]
        ending_mask = beginning_mask.flip(dims=(1, 3))
        beginning_input = input_tensor[:, :affected_seqlen, :, : w + 1]
        beginning_mask = beginning_mask.expand(beginning_input.size())
        beginning_input.masked_fill_(beginning_mask == 1, -float("inf"))  # `== 1` converts to bool or uint8
        ending_input = input_tensor[:, -affected_seqlen:, :, -(w + 1) :]
        ending_mask = ending_mask.expand(ending_input.size())
        ending_input.masked_fill_(ending_mask == 1, -float("inf"))  # `== 1` converts to bool or uint8

    def _sliding_chunks_matmul_qk(self, q: torch.Tensor, k: torch.Tensor, w: int):
        """Matrix multiplicatio of query x key tensors using with a sliding window attention pattern.
        This implementation splits the input into overlapping chunks of size 2w (e.g. 512 for pretrained Longformer)
        with an overlap of size w"""
        batch_size, seqlen, num_heads, head_dim = q.size()
        assert seqlen % (w * 2) == 0, f"Sequence length should be multiple of {w * 2}. Given {seqlen}"
        assert q.size() == k.size()

        chunks_count = seqlen // w - 1

        # group batch_size and num_heads dimensions into one, then chunk seqlen into chunks of size w * 2
        q = q.transpose(1, 2).reshape(batch_size * num_heads, seqlen, head_dim)
        k = k.transpose(1, 2).reshape(batch_size * num_heads, seqlen, head_dim)

        chunk_q = self._chunk(q, w)
        chunk_k = self._chunk(k, w)

        # matrix multipication
        # bcxd: batch_size * num_heads x chunks x 2w x head_dim
        # bcyd: batch_size * num_heads x chunks x 2w x head_dim
        # bcxy: batch_size * num_heads x chunks x 2w x 2w
        chunk_attn = torch.einsum("bcxd,bcyd->bcxy", (chunk_q, chunk_k))  # multiply

        # convert diagonals into columns
        diagonal_chunk_attn = self._skew(chunk_attn, direction=(0, 0, 0, 1))

        # allocate space for the overall attention matrix where the chunks are compined. The last dimension
        # has (w * 2 + 1) columns. The first (w) columns are the w lower triangles (attention from a word to
        # w previous words). The following column is attention score from each word to itself, then
        # followed by w columns for the upper triangle.

        diagonal_attn = diagonal_chunk_attn.new_empty((batch_size * num_heads, chunks_count + 1, w, w * 2 + 1))

        # copy parts from diagonal_chunk_attn into the compined matrix of attentions
        # - copying the main diagonal and the upper triangle
        diagonal_attn[:, :-1, :, w:] = diagonal_chunk_attn[:, :, :w, : w + 1]
        diagonal_attn[:, -1, :, w:] = diagonal_chunk_attn[:, -1, w:, : w + 1]
        # - copying the lower triangle
        diagonal_attn[:, 1:, :, :w] = diagonal_chunk_attn[:, :, -(w + 1) : -1, w + 1 :]
        diagonal_attn[:, 0, 1:w, 1:w] = diagonal_chunk_attn[:, 0, : w - 1, 1 - w :]

        # separate batch_size and num_heads dimensions again
        diagonal_attn = diagonal_attn.view(batch_size, num_heads, seqlen, 2 * w + 1).transpose(2, 1)

        self._mask_invalid_locations(diagonal_attn, w)
        return diagonal_attn

    def _sliding_chunks_matmul_pv(self, prob: torch.Tensor, v: torch.Tensor, w: int):
        """Same as _sliding_chunks_matmul_qk but for prob and value tensors. It is expecting the same output
        format from _sliding_chunks_matmul_qk"""
        batch_size, seqlen, num_heads, head_dim = v.size()
        assert seqlen % (w * 2) == 0
        assert prob.size()[:3] == v.size()[:3]
        assert prob.size(3) == 2 * w + 1
        chunks_count = seqlen // w - 1
        # group batch_size and num_heads dimensions into one, then chunk seqlen into chunks of size 2w
        chunk_prob = prob.transpose(1, 2).reshape(batch_size * num_heads, seqlen // w, w, 2 * w + 1)

        # group batch_size and num_heads dimensions into one
        v = v.transpose(1, 2).reshape(batch_size * num_heads, seqlen, head_dim)

        # pad seqlen with w at the beginning of the sequence and another w at the end
        padded_v = F.pad(v, (0, 0, w, w), value=-1)

        # chunk padded_v into chunks of size 3w and an overlap of size w
        chunk_v_size = (batch_size * num_heads, chunks_count + 1, 3 * w, head_dim)
        chunk_v_stride = padded_v.stride()
        chunk_v_stride = chunk_v_stride[0], w * chunk_v_stride[1], chunk_v_stride[1], chunk_v_stride[2]
        chunk_v = padded_v.as_strided(size=chunk_v_size, stride=chunk_v_stride)

        skewed_prob = self._skew2(chunk_prob)

        context = torch.einsum("bcwd,bcdh->bcwh", (skewed_prob, chunk_v))
        return context.view(batch_size, num_heads, seqlen, head_dim).transpose(1, 2)

    def forward(
        self,
        hidden_states,
        attention_mask=None,
        head_mask=None,
        encoder_hidden_states=None,
        encoder_attention_mask=None,
        output_attentions=False,
    ):
        """
        LongformerSelfAttention expects `len(hidden_states)` to be multiple of `attention_window`.
        Padding to `attention_window` happens in LongformerModel.forward to avoid redoing the padding on each layer.

        The `attention_mask` is changed in `BertModel.forward` from 0, 1, 2 to
            -ve: no attention
              0: local attention
            +ve: global attention

        `encoder_hidden_states` and `encoder_attention_mask` are not supported and should be None
        """
        # TODO: add support for `encoder_hidden_states` and `encoder_attention_mask`
        assert encoder_hidden_states is None, "`encoder_hidden_states` is not supported and should be None"
        assert encoder_attention_mask is None, "`encoder_attention_mask` is not supported and shiould be None"

        if attention_mask is not None:
            attention_mask = attention_mask.squeeze(dim=2).squeeze(dim=1)
            key_padding_mask = attention_mask < 0
            extra_attention_mask = attention_mask > 0
            remove_from_windowed_attention_mask = attention_mask != 0

            num_extra_indices_per_batch = extra_attention_mask.long().sum(dim=1)
            max_num_extra_indices_per_batch = num_extra_indices_per_batch.max()
            if max_num_extra_indices_per_batch <= 0:
                extra_attention_mask = None
            else:
                # To support the case of variable number of global attention in the rows of a batch,
                # we use the following three selection masks to select global attention embeddings
                # in a 3d tensor and pad it to `max_num_extra_indices_per_batch`
                # 1) selecting embeddings that correspond to global attention
                extra_attention_mask_nonzeros = extra_attention_mask.nonzero(as_tuple=True)
                zero_to_max_range = torch.arange(
                    0, max_num_extra_indices_per_batch, device=num_extra_indices_per_batch.device
                )
                # mask indicating which values are actually going to be padding
                selection_padding_mask = zero_to_max_range < num_extra_indices_per_batch.unsqueeze(dim=-1)
                # 2) location of the non-padding values in the selected global attention
                selection_padding_mask_nonzeros = selection_padding_mask.nonzero(as_tuple=True)
                # 3) location of the padding values in the selected global attention
                selection_padding_mask_zeros = (selection_padding_mask == 0).nonzero(as_tuple=True)
        else:
            remove_from_windowed_attention_mask = None
            extra_attention_mask = None
            key_padding_mask = None

        hidden_states = hidden_states.transpose(0, 1)
        seqlen, batch_size, embed_dim = hidden_states.size()
        assert embed_dim == self.embed_dim
        q = self.query(hidden_states)
        k = self.key(hidden_states)
        v = self.value(hidden_states)
        q /= math.sqrt(self.head_dim)

        q = q.view(seqlen, batch_size, self.num_heads, self.head_dim).transpose(0, 1)
        k = k.view(seqlen, batch_size, self.num_heads, self.head_dim).transpose(0, 1)
        # attn_weights = (batch_size, seqlen, num_heads, window*2+1)
        attn_weights = self._sliding_chunks_matmul_qk(q, k, self.one_sided_attention_window_size)
        if remove_from_windowed_attention_mask is not None:
            # This implementation is fast and takes very little memory because num_heads x hidden_size = 1
            # from (batch_size x seqlen) to (batch_size x seqlen x num_heads x hidden_size)
            remove_from_windowed_attention_mask = remove_from_windowed_attention_mask.unsqueeze(dim=-1).unsqueeze(
                dim=-1
            )
            # cast to fp32/fp16 then replace 1's with -inf
            float_mask = remove_from_windowed_attention_mask.type_as(q).masked_fill(
                remove_from_windowed_attention_mask, -10000.0
            )
            ones = float_mask.new_ones(size=float_mask.size())  # tensor of ones
            # diagonal mask with zeros everywhere and -inf inplace of padding
            d_mask = self._sliding_chunks_matmul_qk(ones, float_mask, self.one_sided_attention_window_size)
            attn_weights += d_mask
        assert list(attn_weights.size()) == [
            batch_size,
            seqlen,
            self.num_heads,
            self.one_sided_attention_window_size * 2 + 1,
        ]

        # the extra attention
        if extra_attention_mask is not None:
            selected_k = k.new_zeros(batch_size, max_num_extra_indices_per_batch, self.num_heads, self.head_dim)
            selected_k[selection_padding_mask_nonzeros] = k[extra_attention_mask_nonzeros]
            # (batch_size, seqlen, num_heads, max_num_extra_indices_per_batch)
            selected_attn_weights = torch.einsum("blhd,bshd->blhs", (q, selected_k))
            selected_attn_weights[selection_padding_mask_zeros[0], :, :, selection_padding_mask_zeros[1]] = -10000.0
            # concat to attn_weights
            # (batch_size, seqlen, num_heads, extra attention count + 2*window+1)
            attn_weights = torch.cat((selected_attn_weights, attn_weights), dim=-1)

        attn_weights_fp32 = F.softmax(attn_weights, dim=-1, dtype=torch.float32)  # use fp32 for numerical stability
        attn_weights = attn_weights_fp32.type_as(attn_weights)

        if key_padding_mask is not None:
            # softmax sometimes inserts NaN if all positions are masked, replace them with 0
            attn_weights = torch.masked_fill(attn_weights, key_padding_mask.unsqueeze(-1).unsqueeze(-1), 0.0)

        attn_probs = F.dropout(attn_weights, p=self.dropout, training=self.training)
        v = v.view(seqlen, batch_size, self.num_heads, self.head_dim).transpose(0, 1)
        attn = None
        if extra_attention_mask is not None:
            selected_attn_probs = attn_probs.narrow(-1, 0, max_num_extra_indices_per_batch)
            selected_v = v.new_zeros(batch_size, max_num_extra_indices_per_batch, self.num_heads, self.head_dim)
            selected_v[selection_padding_mask_nonzeros] = v[extra_attention_mask_nonzeros]
            # use `matmul` because `einsum` crashes sometimes with fp16
            # attn = torch.einsum('blhs,bshd->blhd', (selected_attn_probs, selected_v))
            attn = torch.matmul(selected_attn_probs.transpose(1, 2), selected_v.transpose(1, 2)).transpose(1, 2)
            attn_probs = attn_probs.narrow(
                -1, max_num_extra_indices_per_batch, attn_probs.size(-1) - max_num_extra_indices_per_batch
            ).contiguous()
        if attn is None:
            attn = self._sliding_chunks_matmul_pv(attn_probs, v, self.one_sided_attention_window_size)
        else:
            attn += self._sliding_chunks_matmul_pv(attn_probs, v, self.one_sided_attention_window_size)

        assert attn.size() == (batch_size, seqlen, self.num_heads, self.head_dim), "Unexpected size"
        attn = attn.transpose(0, 1).reshape(seqlen, batch_size, embed_dim).contiguous()

        # For this case, we'll just recompute the attention for these indices
        # and overwrite the attn tensor.
        # TODO: remove the redundant computation
        if extra_attention_mask is not None:
            selected_hidden_states = hidden_states.new_zeros(max_num_extra_indices_per_batch, batch_size, embed_dim)
            selected_hidden_states[selection_padding_mask_nonzeros[::-1]] = hidden_states[
                extra_attention_mask_nonzeros[::-1]
            ]

            q = self.query_global(selected_hidden_states)
            k = self.key_global(hidden_states)
            v = self.value_global(hidden_states)
            q /= math.sqrt(self.head_dim)

            q = (
                q.contiguous()
                .view(max_num_extra_indices_per_batch, batch_size * self.num_heads, self.head_dim)
                .transpose(0, 1)
            )  # (batch_size * self.num_heads, max_num_extra_indices_per_batch, head_dim)
            k = (
                k.contiguous().view(-1, batch_size * self.num_heads, self.head_dim).transpose(0, 1)
            )  # batch_size * self.num_heads, seqlen, head_dim)
            v = (
                v.contiguous().view(-1, batch_size * self.num_heads, self.head_dim).transpose(0, 1)
            )  # batch_size * self.num_heads, seqlen, head_dim)
            attn_weights = torch.bmm(q, k.transpose(1, 2))
            assert list(attn_weights.size()) == [batch_size * self.num_heads, max_num_extra_indices_per_batch, seqlen]

            attn_weights = attn_weights.view(batch_size, self.num_heads, max_num_extra_indices_per_batch, seqlen)
            attn_weights[selection_padding_mask_zeros[0], :, selection_padding_mask_zeros[1], :] = -10000.0
            if key_padding_mask is not None:
                attn_weights = attn_weights.masked_fill(key_padding_mask.unsqueeze(1).unsqueeze(2), -10000.0,)
            attn_weights = attn_weights.view(batch_size * self.num_heads, max_num_extra_indices_per_batch, seqlen)
            attn_weights_float = F.softmax(
                attn_weights, dim=-1, dtype=torch.float32
            )  # use fp32 for numerical stability
            attn_probs = F.dropout(attn_weights_float.type_as(attn_weights), p=self.dropout, training=self.training)
            selected_attn = torch.bmm(attn_probs, v)
            assert list(selected_attn.size()) == [
                batch_size * self.num_heads,
                max_num_extra_indices_per_batch,
                self.head_dim,
            ]

            selected_attn_4d = selected_attn.view(
                batch_size, self.num_heads, max_num_extra_indices_per_batch, self.head_dim
            )
            nonzero_selected_attn = selected_attn_4d[
                selection_padding_mask_nonzeros[0], :, selection_padding_mask_nonzeros[1]
            ]
            attn[extra_attention_mask_nonzeros[::-1]] = nonzero_selected_attn.view(
                len(selection_padding_mask_nonzeros[0]), -1
            )

        context_layer = attn.transpose(0, 1)
        if output_attentions:
            if extra_attention_mask is not None:
                # With global attention, return global attention probabilities only
                # batch_size x num_heads x max_num_global_attention_tokens x sequence_length
                # which is the attention weights from tokens with global attention to all tokens
                # It doesn't not return local attention
                # In case of variable number of global attantion in the rows of a batch,
                # attn_weights are padded with -10000.0 attention scores
                attn_weights = attn_weights.view(batch_size, self.num_heads, max_num_extra_indices_per_batch, seqlen)
            else:
                # without global attention, return local attention probabilities
                # batch_size x num_heads x sequence_length x window_size
                # which is the attention weights of every token attending to its neighbours
                attn_weights = attn_weights.permute(0, 2, 1, 3)
        outputs = (context_layer, attn_weights) if output_attentions else (context_layer,)
        return outputs


LONGFORMER_START_DOCSTRING = r"""

    This model is a PyTorch `torch.nn.Module <https://pytorch.org/docs/stable/nn.html#torch.nn.Module>`_ sub-class.
    Use it as a regular PyTorch Module and refer to the PyTorch documentation for all matter related to general
    usage and behavior.

    Parameters:
        config (:class:`~transformers.LongformerConfig`): Model configuration class with all the parameters of the
            model. Initializing with a config file does not load the weights associated with the model, only the configuration.
            Check out the :meth:`~transformers.PreTrainedModel.from_pretrained` method to load the model weights.
"""

LONGFORMER_INPUTS_DOCSTRING = r"""
    Args:
        input_ids (:obj:`torch.LongTensor` of shape :obj:`{0}`):
            Indices of input sequence tokens in the vocabulary.

            Indices can be obtained using :class:`transformers.LonmgformerTokenizer`.
            See :func:`transformers.PreTrainedTokenizer.encode` and
            :func:`transformers.PreTrainedTokenizer.encode_plus` for details.

            `What are input IDs? <../glossary.html#input-ids>`__
        attention_mask (:obj:`torch.FloatTensor` of shape :obj:`{0}`, `optional`, defaults to :obj:`None`):
            Mask to avoid performing attention on padding token indices.
            Mask values selected in ``[0, 1]``:
            ``1`` for tokens that are NOT MASKED, ``0`` for MASKED tokens.

            `What are attention masks? <../glossary.html#attention-mask>`__

        global_attention_mask (:obj:`torch.FloatTensor` of shape :obj:`{0}`, `optional`, defaults to :obj:`None`):
            Mask to decide the attention given on each token, local attention or global attenion.
            Tokens with global attention attends to all other tokens, and all other tokens attend to them. This is important for
            task-specific finetuning because it makes the model more flexible at representing the task. For example,
            for classification, the <s> token should be given global attention. For QA, all question tokens should also have
            global attention. Please refer to the Longformer paper https://arxiv.org/abs/2004.05150 for more details.
            Mask values selected in ``[0, 1]``:
            ``0`` for local attention (a sliding window attention),
            ``1`` for global attention (tokens that attend to all other tokens, and all other tokens attend to them).

        token_type_ids (:obj:`torch.LongTensor` of shape :obj:`{0}`, `optional`, defaults to :obj:`None`):
            Segment token indices to indicate first and second portions of the inputs.
            Indices are selected in ``[0, 1]``: ``0`` corresponds to a `sentence A` token, ``1``
            corresponds to a `sentence B` token

            `What are token type IDs? <../glossary.html#token-type-ids>`_
        position_ids (:obj:`torch.LongTensor` of shape :obj:`{0}`, `optional`, defaults to :obj:`None`):
            Indices of positions of each input sequence tokens in the position embeddings.
            Selected in the range ``[0, config.max_position_embeddings - 1]``.

            `What are position IDs? <../glossary.html#position-ids>`_
        inputs_embeds (:obj:`torch.FloatTensor` of shape :obj:`(batch_size, sequence_length, hidden_size)`, `optional`, defaults to :obj:`None`):
            Optionally, instead of passing :obj:`input_ids` you can choose to directly pass an embedded representation.
            This is useful if you want more control over how to convert `input_ids` indices into associated vectors
            than the model's internal embedding lookup matrix.
        output_attentions (:obj:`bool`, `optional`, defaults to :obj:`None`):
            If set to ``True``, the attentions tensors of all attention layers are returned. See ``attentions`` under returned tensors for more detail.
"""


@add_start_docstrings(
    "The bare Longformer Model outputting raw hidden-states without any specific head on top.",
    LONGFORMER_START_DOCSTRING,
)
class LongformerModel(RobertaModel):
    """
    This class overrides :class:`~transformers.RobertaModel` to provide the ability to process
    long sequences following the selfattention approach described in `Longformer: the Long-Document Transformer
    <https://arxiv.org/abs/2004.05150>`_ by Iz Beltagy, Matthew E. Peters, and Arman Cohan. Longformer selfattention
    combines a local (sliding window) and global attention to extend to long documents without the O(n^2) increase in
    memory and compute.

    The selfattention module `LongformerSelfAttention` implemented here supports the combination of local and
    global attention but it lacks support for autoregressive attention and dilated attention. Autoregressive
    and dilated attention are more relevant for autoregressive language modeling than finetuning on downstream
    tasks. Future release will add support for autoregressive attention, but the support for dilated attention
    requires a custom CUDA kernel to be memory and compute efficient.

    """

    config_class = LongformerConfig
    base_model_prefix = "longformer"

    def __init__(self, config):
        super().__init__(config)

        if isinstance(config.attention_window, int):
            assert config.attention_window % 2 == 0, "`config.attention_window` has to be an even value"
            assert config.attention_window > 0, "`config.attention_window` has to be positive"
            config.attention_window = [config.attention_window] * config.num_hidden_layers  # one value per layer
        else:
            assert len(config.attention_window) == config.num_hidden_layers, (
                "`len(config.attention_window)` should equal `config.num_hidden_layers`. "
                f"Expected {config.num_hidden_layers}, given {len(config.attention_window)}"
            )

        for i, layer in enumerate(self.encoder.layer):
            # replace the `modeling_bert.BertSelfAttention` object with `LongformerSelfAttention`
            layer.attention.self = LongformerSelfAttention(config, layer_id=i)

        self.init_weights()

    def _pad_to_window_size(
        self,
        input_ids: torch.Tensor,
        attention_mask: torch.Tensor,
        token_type_ids: torch.Tensor,
        position_ids: torch.Tensor,
        inputs_embeds: torch.Tensor,
        attention_window: int,
        pad_token_id: int,
    ):
        """A helper function to pad tokens and mask to work with implementation of Longformer selfattention."""

        assert attention_window % 2 == 0, f"`attention_window` should be an even value. Given {attention_window}"
        input_shape = input_ids.shape if input_ids is not None else inputs_embeds.shape
        batch_size, seqlen = input_shape[:2]

        padding_len = (attention_window - seqlen % attention_window) % attention_window
        if padding_len > 0:
            logger.info(
                "Input ids are automatically padded from {} to {} to be a multiple of `config.attention_window`: {}".format(
                    seqlen, seqlen + padding_len, attention_window
                )
            )
            if input_ids is not None:
                input_ids = F.pad(input_ids, (0, padding_len), value=pad_token_id)
            if attention_mask is not None:
                attention_mask = F.pad(
                    attention_mask, (0, padding_len), value=False
                )  # no attention on the padding tokens
            if token_type_ids is not None:
                token_type_ids = F.pad(token_type_ids, (0, padding_len), value=0)  # pad with token_type_id = 0
            if position_ids is not None:
                # pad with position_id = pad_token_id as in modeling_roberta.RobertaEmbeddings
                position_ids = F.pad(position_ids, (0, padding_len), value=pad_token_id)
            if inputs_embeds is not None:
                input_ids_padding = inputs_embeds.new_full(
                    (batch_size, padding_len), self.config.pad_token_id, dtype=torch.long,
                )
                inputs_embeds_padding = self.embeddings(input_ids_padding)
                inputs_embeds = torch.cat([inputs_embeds, inputs_embeds_padding], dim=-2)

        return padding_len, input_ids, attention_mask, token_type_ids, position_ids, inputs_embeds

    @add_start_docstrings_to_callable(LONGFORMER_INPUTS_DOCSTRING.format("(batch_size, sequence_length)"))
    def forward(
        self,
        input_ids=None,
        attention_mask=None,
        global_attention_mask=None,
        token_type_ids=None,
        position_ids=None,
        inputs_embeds=None,
        output_attentions=None,
    ):
        r"""

    Returns:
        :obj:`tuple(torch.FloatTensor)` comprising various elements depending on the configuration (:class:`~transformers.RobertaConfig`) and inputs:
        prediction_scores (:obj:`torch.FloatTensor` of shape :obj:`(batch_size, sequence_length, config.vocab_size)`)
            Prediction scores of the language modeling head (scores for each vocabulary token before SoftMax).
        hidden_states (:obj:`tuple(torch.FloatTensor)`, `optional`, returned when ``config.output_hidden_states=True``):
            Tuple of :obj:`torch.FloatTensor` (one for the output of the embeddings + one for the output of each layer)
            of shape :obj:`(batch_size, sequence_length, hidden_size)`.

            Hidden-states of the model at the output of each layer plus the initial embedding outputs.
        attentions (:obj:`tuple(torch.FloatTensor)`, `optional`, returned when ``output_attentions=True`` is passed or ``config.output_attentions=True``):
            Tuple of :obj:`torch.FloatTensor` (one for each layer) of shape
            :obj:`(batch_size, num_heads, sequence_length, sequence_length)`.

            Attentions weights after the attention softmax, used to compute the weighted average in the self-attention
            heads.

    Examples::

        import torch
        from transformers import LongformerModel, LongformerTokenizer

        model = LongformerModel.from_pretrained('allenai/longformer-base-4096')
        tokenizer = LongformerTokenizer.from_pretrained('allenai/longformer-base-4096')

        SAMPLE_TEXT = ' '.join(['Hello world! '] * 1000)  # long input document
        input_ids = torch.tensor(tokenizer.encode(SAMPLE_TEXT)).unsqueeze(0)  # batch of size 1

        # Attention mask values -- 0: no attention, 1: local attention, 2: global attention
        attention_mask = torch.ones(input_ids.shape, dtype=torch.long, device=input_ids.device) # initialize to local attention
        attention_mask[:, [1, 4, 21,]] = 2  # Set global attention based on the task. For example,
                                            # classification: the <s> token
                                            # QA: question tokens
                                            # LM: potentially on the beginning of sentences and paragraphs
        sequence_output, pooled_output = model(input_ids, attention_mask=attention_mask)
        """

        output_attentions = output_attentions if output_attentions is not None else self.config.output_attentions

        # padding
        attention_window = (
            self.config.attention_window
            if isinstance(self.config.attention_window, int)
            else max(self.config.attention_window)
        )

        # merge `global_attention_mask` and `attention_mask`
        if global_attention_mask is not None:
            # longformer self attention expects attention mask to have 0 (no attn), 1 (local attn), 2 (global attn)
            # (global_attention_mask + 1) => 1 for local attention, 2 for global attention
            # => final attention_mask => 0 for no attention, 1 for local attention 2 for global attention
            if attention_mask is not None:
                attention_mask = attention_mask * (global_attention_mask + 1)
            else:
                # simply use `global_attention_mask` as `attention_mask`
                # if no `attention_mask` is given
                attention_mask = global_attention_mask + 1

        padding_len, input_ids, attention_mask, token_type_ids, position_ids, inputs_embeds = self._pad_to_window_size(
            input_ids=input_ids,
            attention_mask=attention_mask,
            token_type_ids=token_type_ids,
            position_ids=position_ids,
            inputs_embeds=inputs_embeds,
            attention_window=attention_window,
            pad_token_id=self.config.pad_token_id,
        )

        # embed
        output = super().forward(
            input_ids=input_ids,
            attention_mask=attention_mask,
            token_type_ids=token_type_ids,
            position_ids=position_ids,
            head_mask=None,
            inputs_embeds=inputs_embeds,
            encoder_hidden_states=None,
            encoder_attention_mask=None,
            output_attentions=output_attentions,
        )

        # undo padding
        if padding_len > 0:
            # `output` has the following tensors: sequence_output, pooled_output, (hidden_states), (attentions)
            # `sequence_output`: unpad because the calling function is expecting a length == input_ids.size(1)
            # `pooled_output`: independent of the sequence length
            # `hidden_states`: mainly used for debugging and analysis, so keep the padding
            # `attentions`: mainly used for debugging and analysis, so keep the padding
            output = output[0][:, :-padding_len], *output[1:]

        return output


@add_start_docstrings("""Longformer Model with a `language modeling` head on top. """, LONGFORMER_START_DOCSTRING)
class LongformerForMaskedLM(BertPreTrainedModel):
    config_class = LongformerConfig
    base_model_prefix = "longformer"

    def __init__(self, config):
        super().__init__(config)

        self.longformer = LongformerModel(config)
        self.lm_head = RobertaLMHead(config)

        self.init_weights()

    @add_start_docstrings_to_callable(LONGFORMER_INPUTS_DOCSTRING.format("(batch_size, sequence_length)"))
    def forward(
        self,
        input_ids=None,
        attention_mask=None,
        global_attention_mask=None,
        token_type_ids=None,
        position_ids=None,
        inputs_embeds=None,
        labels=None,
        output_attentions=None,
        **kwargs
    ):
        r"""
        labels (:obj:`torch.LongTensor` of shape :obj:`(batch_size, sequence_length)`, `optional`, defaults to :obj:`None`):
            Labels for computing the masked language modeling loss.
            Indices should be in ``[-100, 0, ..., config.vocab_size]`` (see ``input_ids`` docstring)
            Tokens with indices set to ``-100`` are ignored (masked), the loss is only computed for the tokens with labels
            in ``[0, ..., config.vocab_size]``
        kwargs (:obj:`Dict[str, any]`, optional, defaults to `{}`):
            Used to hide legacy arguments that have been deprecated.

    Returns:
        :obj:`tuple(torch.FloatTensor)` comprising various elements depending on the configuration (:class:`~transformers.RobertaConfig`) and inputs:
        masked_lm_loss (`optional`, returned when ``labels`` is provided) ``torch.FloatTensor`` of shape ``(1,)``:
            Masked language modeling loss.
        prediction_scores (:obj:`torch.FloatTensor` of shape :obj:`(batch_size, sequence_length, config.vocab_size)`)
            Prediction scores of the language modeling head (scores for each vocabulary token before SoftMax).
        hidden_states (:obj:`tuple(torch.FloatTensor)`, `optional`, returned when ``config.output_hidden_states=True``):
            Tuple of :obj:`torch.FloatTensor` (one for the output of the embeddings + one for the output of each layer)
            of shape :obj:`(batch_size, sequence_length, hidden_size)`.

            Hidden-states of the model at the output of each layer plus the initial embedding outputs.
        attentions (:obj:`tuple(torch.FloatTensor)`, `optional`, returned when ``output_attentions=True`` is passed or ``config.output_attentions=True``):
            Tuple of :obj:`torch.FloatTensor` (one for each layer) of shape
            :obj:`(batch_size, num_heads, sequence_length, sequence_length)`.

            Attentions weights after the attention softmax, used to compute the weighted average in the self-attention
            heads.

    Examples::

        import torch
        from transformers import LongformerForMaskedLM, LongformerTokenizer

        model = LongformerForMaskedLM.from_pretrained('allenai/longformer-base-4096')
        tokenizer = LongformerTokenizer.from_pretrained('allenai/longformer-base-4096')

        SAMPLE_TEXT = ' '.join(['Hello world! '] * 1000)  # long input document
        input_ids = torch.tensor(tokenizer.encode(SAMPLE_TEXT)).unsqueeze(0)  # batch of size 1

        attention_mask = None  # default is local attention everywhere, which is a good choice for MaskedLM
                               # check ``LongformerModel.forward`` for more details how to set `attention_mask`
        loss, prediction_scores = model(input_ids, attention_mask=attention_mask, labels=input_ids)
        """

        if "masked_lm_labels" in kwargs:
            warnings.warn(
                "The `masked_lm_labels` argument is deprecated and will be removed in a future version, use `labels` instead.",
                DeprecationWarning,
            )
            labels = kwargs.pop("masked_lm_labels")
        assert kwargs == {}, f"Unexpected keyword arguments: {list(kwargs.keys())}."

        outputs = self.longformer(
            input_ids,
            attention_mask=attention_mask,
            global_attention_mask=global_attention_mask,
            token_type_ids=token_type_ids,
            position_ids=position_ids,
            inputs_embeds=inputs_embeds,
            output_attentions=output_attentions,
        )
        sequence_output = outputs[0]
        prediction_scores = self.lm_head(sequence_output)

        outputs = (prediction_scores,) + outputs[2:]  # Add hidden states and attention if they are here

        if labels is not None:
            loss_fct = CrossEntropyLoss()
            masked_lm_loss = loss_fct(prediction_scores.view(-1, self.config.vocab_size), labels.view(-1))
            outputs = (masked_lm_loss,) + outputs

        return outputs  # (masked_lm_loss), prediction_scores, (hidden_states), (attentions)


@add_start_docstrings(
    """Longformer Model transformer with a sequence classification/regression head on top (a linear layer
    on top of the pooled output) e.g. for GLUE tasks. """,
    LONGFORMER_START_DOCSTRING,
)
class LongformerForSequenceClassification(BertPreTrainedModel):
    config_class = LongformerConfig
    base_model_prefix = "longformer"

    def __init__(self, config):
        super().__init__(config)
        self.num_labels = config.num_labels

        self.longformer = LongformerModel(config)
        self.classifier = LongformerClassificationHead(config)

        self.init_weights()

    @add_start_docstrings_to_callable(LONGFORMER_INPUTS_DOCSTRING.format("(batch_size, sequence_length)"))
    def forward(
        self,
        input_ids=None,
        attention_mask=None,
        global_attention_mask=None,
        token_type_ids=None,
        position_ids=None,
        inputs_embeds=None,
        labels=None,
        output_attentions=None,
    ):
        r"""
        labels (:obj:`torch.LongTensor` of shape :obj:`(batch_size,)`, `optional`, defaults to :obj:`None`):
            Labels for computing the sequence classification/regression loss.
            Indices should be in :obj:`[0, ..., config.num_labels - 1]`.
            If :obj:`config.num_labels == 1` a regression loss is computed (Mean-Square loss),
            If :obj:`config.num_labels > 1` a classification loss is computed (Cross-Entropy).

    Returns:
        :obj:`tuple(torch.FloatTensor)` comprising various elements depending on the configuration (:class:`~transformers.LongformerConfig`) and inputs:
        loss (:obj:`torch.FloatTensor` of shape :obj:`(1,)`, `optional`, returned when :obj:`label` is provided):
            Classification (or regression if config.num_labels==1) loss.
        logits (:obj:`torch.FloatTensor` of shape :obj:`(batch_size, config.num_labels)`):
            Classification (or regression if config.num_labels==1) scores (before SoftMax).
        hidden_states (:obj:`tuple(torch.FloatTensor)`, `optional`, returned when ``config.output_hidden_states=True``):
            Tuple of :obj:`torch.FloatTensor` (one for the output of the embeddings + one for the output of each layer)
            of shape :obj:`(batch_size, sequence_length, hidden_size)`.

            Hidden-states of the model at the output of each layer plus the initial embedding outputs.
        attentions (:obj:`tuple(torch.FloatTensor)`, `optional`, returned when ``output_attentions=True`` is passed or ``config.output_attentions=True``):
            Tuple of :obj:`torch.FloatTensor` (one for each layer) of shape
            :obj:`(batch_size, num_heads, sequence_length, sequence_length)`.

            Attentions weights after the attention softmax, used to compute the weighted average in the self-attention
            heads.

    Examples::

        from transformers import LongformerTokenizer, LongformerForSequenceClassification
        import torch

        tokenizer = LongformerTokenizer.from_pretrained('allenai/longformer-base-4096')
        model = LongformerForSequenceClassification.from_pretrained('allenai/longformer-base-4096')
        input_ids = torch.tensor(tokenizer.encode("Hello, my dog is cute", add_special_tokens=True)).unsqueeze(0)  # Batch size 1
        labels = torch.tensor([1]).unsqueeze(0)  # Batch size 1
        outputs = model(input_ids, labels=labels)
        loss, logits = outputs[:2]

        """

        if global_attention_mask is None:
            logger.info("Initializing global attention on CLS token...")
            global_attention_mask = torch.zeros_like(input_ids)
            # global attention on cls token
            global_attention_mask[:, 0] = 1

        outputs = self.longformer(
            input_ids,
            attention_mask=attention_mask,
            global_attention_mask=global_attention_mask,
            token_type_ids=token_type_ids,
            position_ids=position_ids,
            inputs_embeds=inputs_embeds,
            output_attentions=output_attentions,
        )
        sequence_output = outputs[0]
        logits = self.classifier(sequence_output)

        outputs = (logits,) + outputs[2:]
        if labels is not None:
            if self.num_labels == 1:
                #  We are doing regression
                loss_fct = MSELoss()
                loss = loss_fct(logits.view(-1), labels.view(-1))
            else:
                loss_fct = CrossEntropyLoss()
                loss = loss_fct(logits.view(-1, self.num_labels), labels.view(-1))
            outputs = (loss,) + outputs

        return outputs  # (loss), logits, (hidden_states), (attentions)


class LongformerClassificationHead(nn.Module):
    """Head for sentence-level classification tasks."""

    def __init__(self, config):
        super().__init__()
        self.dense = nn.Linear(config.hidden_size, config.hidden_size)
        self.dropout = nn.Dropout(config.hidden_dropout_prob)
        self.out_proj = nn.Linear(config.hidden_size, config.num_labels)

    def forward(self, hidden_states, **kwargs):
        hidden_states = hidden_states[:, 0, :]  # take <s> token (equiv. to [CLS])
        hidden_states = self.dropout(hidden_states)
        hidden_states = self.dense(hidden_states)
        hidden_states = torch.tanh(hidden_states)
        hidden_states = self.dropout(hidden_states)
        output = self.out_proj(hidden_states)
        return output


@add_start_docstrings(
    """Longformer Model with a span classification head on top for extractive question-answering tasks like SQuAD / TriviaQA (a linear layers on top of
    the hidden-states output to compute `span start logits` and `span end logits`). """,
    LONGFORMER_START_DOCSTRING,
)
class LongformerForQuestionAnswering(BertPreTrainedModel):
    config_class = LongformerConfig
    base_model_prefix = "longformer"

    def __init__(self, config):
        super().__init__(config)
        self.num_labels = config.num_labels

        self.longformer = LongformerModel(config)
        self.qa_outputs = nn.Linear(config.hidden_size, config.num_labels)

        self.init_weights()

    @add_start_docstrings_to_callable(LONGFORMER_INPUTS_DOCSTRING.format("(batch_size, sequence_length)"))
    def forward(
        self,
        input_ids=None,
        attention_mask=None,
        global_attention_mask=None,
        token_type_ids=None,
        position_ids=None,
        inputs_embeds=None,
        start_positions=None,
        end_positions=None,
        output_attentions=None,
    ):
        r"""
        start_positions (:obj:`torch.LongTensor` of shape :obj:`(batch_size,)`, `optional`, defaults to :obj:`None`):
            Labels for position (index) of the start of the labelled span for computing the token classification loss.
            Positions are clamped to the length of the sequence (`sequence_length`).
            Position outside of the sequence are not taken into account for computing the loss.
        end_positions (:obj:`torch.LongTensor` of shape :obj:`(batch_size,)`, `optional`, defaults to :obj:`None`):
            Labels for position (index) of the end of the labelled span for computing the token classification loss.
            Positions are clamped to the length of the sequence (`sequence_length`).
            Position outside of the sequence are not taken into account for computing the loss.
    Returns:
        :obj:`tuple(torch.FloatTensor)` comprising various elements depending on the configuration (:class:`~transformers.LongformerConfig`) and inputs:
        loss (:obj:`torch.FloatTensor` of shape :obj:`(1,)`, `optional`, returned when :obj:`labels` is provided):
            Total span extraction loss is the sum of a Cross-Entropy for the start and end positions.
        start_scores (:obj:`torch.FloatTensor` of shape :obj:`(batch_size, sequence_length,)`):
            Span-start scores (before SoftMax).
        end_scores (:obj:`torch.FloatTensor` of shape :obj:`(batch_size, sequence_length,)`):
            Span-end scores (before SoftMax).
        hidden_states (:obj:`tuple(torch.FloatTensor)`, `optional`, returned when ``config.output_hidden_states=True``):
            Tuple of :obj:`torch.FloatTensor` (one for the output of the embeddings + one for the output of each layer)
            of shape :obj:`(batch_size, sequence_length, hidden_size)`.
            Hidden-states of the model at the output of each layer plus the initial embedding outputs.
        attentions (:obj:`tuple(torch.FloatTensor)`, `optional`, returned when ``output_attentions=True`` is passed or ``config.output_attentions=True``):
            Tuple of :obj:`torch.FloatTensor` (one for each layer) of shape
            :obj:`(batch_size, num_heads, sequence_length, sequence_length)`.
            Attentions weights after the attention softmax, used to compute the weighted average in the self-attention
            heads.

    Examples::

        from transformers import LongformerTokenizer, LongformerForQuestionAnswering
        import torch

        tokenizer = LongformerTokenizer.from_pretrained("allenai/longformer-large-4096-finetuned-triviaqa")
        model = LongformerForQuestionAnswering.from_pretrained("allenai/longformer-large-4096-finetuned-triviaqa")

        question, text = "Who was Jim Henson?", "Jim Henson was a nice puppet"
        encoding = tokenizer.encode_plus(question, text, return_tensors="pt")
        input_ids = encoding["input_ids"]

        # default is local attention everywhere
        # the forward method will automatically set global attention on question tokens
        attention_mask = encoding["attention_mask"]

        start_scores, end_scores = model(input_ids, attention_mask=attention_mask)
        all_tokens = tokenizer.convert_ids_to_tokens(input_ids[0].tolist())

        answer_tokens = all_tokens[torch.argmax(start_scores) :torch.argmax(end_scores)+1]
        answer = tokenizer.decode(tokenizer.convert_tokens_to_ids(answer_tokens)) # remove space prepending space token

        """

        # set global attention on question tokens
        if global_attention_mask is None:
            logger.info("Initializing global attention on question tokens...")
            # put global attention on all tokens until `config.sep_token_id` is reached
            global_attention_mask = _compute_global_attention_mask(input_ids, self.config.sep_token_id)

        outputs = self.longformer(
            input_ids,
            attention_mask=attention_mask,
            global_attention_mask=global_attention_mask,
            token_type_ids=token_type_ids,
            position_ids=position_ids,
            inputs_embeds=inputs_embeds,
            output_attentions=output_attentions,
        )

        sequence_output = outputs[0]

        logits = self.qa_outputs(sequence_output)
        start_logits, end_logits = logits.split(1, dim=-1)
        start_logits = start_logits.squeeze(-1)
        end_logits = end_logits.squeeze(-1)

        outputs = (start_logits, end_logits,) + outputs[2:]
        if start_positions is not None and end_positions is not None:
            # If we are on multi-GPU, split add a dimension
            if len(start_positions.size()) > 1:
                start_positions = start_positions.squeeze(-1)
            if len(end_positions.size()) > 1:
                end_positions = end_positions.squeeze(-1)
            # sometimes the start/end positions are outside our model inputs, we ignore these terms
            ignored_index = start_logits.size(1)
            start_positions.clamp_(0, ignored_index)
            end_positions.clamp_(0, ignored_index)

            loss_fct = CrossEntropyLoss(ignore_index=ignored_index)
            start_loss = loss_fct(start_logits, start_positions)
            end_loss = loss_fct(end_logits, end_positions)
            total_loss = (start_loss + end_loss) / 2
            outputs = (total_loss,) + outputs

        return outputs  # (loss), start_logits, end_logits, (hidden_states), (attentions)


@add_start_docstrings(
    """Longformer Model with a token classification head on top (a linear layer on top of
    the hidden-states output) e.g. for Named-Entity-Recognition (NER) tasks. """,
    LONGFORMER_START_DOCSTRING,
)
class LongformerForTokenClassification(BertPreTrainedModel):
    config_class = LongformerConfig
    base_model_prefix = "longformer"

    def __init__(self, config):
        super().__init__(config)
        self.num_labels = config.num_labels

        self.longformer = LongformerModel(config)
        self.dropout = nn.Dropout(config.hidden_dropout_prob)
        self.classifier = nn.Linear(config.hidden_size, config.num_labels)

        self.init_weights()

    @add_start_docstrings_to_callable(LONGFORMER_INPUTS_DOCSTRING.format("(batch_size, sequence_length)"))
    def forward(
        self,
        input_ids=None,
        attention_mask=None,
        global_attention_mask=None,
        token_type_ids=None,
        position_ids=None,
        inputs_embeds=None,
        labels=None,
        output_attentions=None,
    ):
        r"""
        labels (:obj:`torch.LongTensor` of shape :obj:`(batch_size, sequence_length)`, `optional`, defaults to :obj:`None`):
            Labels for computing the token classification loss.
            Indices should be in ``[0, ..., config.num_labels - 1]``.

    Returns:
        :obj:`tuple(torch.FloatTensor)` comprising various elements depending on the configuration (:class:`~transformers.LongformerConfig`) and inputs:
        loss (:obj:`torch.FloatTensor` of shape :obj:`(1,)`, `optional`, returned when ``labels`` is provided) :
            Classification loss.
        scores (:obj:`torch.FloatTensor` of shape :obj:`(batch_size, sequence_length, config.num_labels)`)
            Classification scores (before SoftMax).
        hidden_states (:obj:`tuple(torch.FloatTensor)`, `optional`, returned when ``config.output_hidden_states=True``):
            Tuple of :obj:`torch.FloatTensor` (one for the output of the embeddings + one for the output of each layer)
            of shape :obj:`(batch_size, sequence_length, hidden_size)`.

            Hidden-states of the model at the output of each layer plus the initial embedding outputs.
        attentions (:obj:`tuple(torch.FloatTensor)`, `optional`, returned when ``output_attentions=True`` is passed or ``config.output_attentions=True``):
            Tuple of :obj:`torch.FloatTensor` (one for each layer) of shape
            :obj:`(batch_size, num_heads, sequence_length, sequence_length)`.

            Attentions weights after the attention softmax, used to compute the weighted average in the self-attention
            heads.

    Examples::

        from transformers import LongformerTokenizer, LongformerForTokenClassification
        import torch

        tokenizer = LongformerTokenizer.from_pretrained('allenai/longformer-base-4096')
        model = LongformerForTokenClassification.from_pretrained('allenai/longformer-base-4096')
        input_ids = torch.tensor(tokenizer.encode("Hello, my dog is cute", add_special_tokens=True)).unsqueeze(0)  # Batch size 1
        labels = torch.tensor([1] * input_ids.size(1)).unsqueeze(0)  # Batch size 1
        outputs = model(input_ids, labels=labels)
        loss, scores = outputs[:2]

        """

        outputs = self.longformer(
            input_ids,
            attention_mask=attention_mask,
            global_attention_mask=global_attention_mask,
            token_type_ids=token_type_ids,
            position_ids=position_ids,
            inputs_embeds=inputs_embeds,
            output_attentions=output_attentions,
        )

        sequence_output = outputs[0]

        sequence_output = self.dropout(sequence_output)
        logits = self.classifier(sequence_output)

        outputs = (logits,) + outputs[2:]  # add hidden states and attention if they are here

        if labels is not None:
            loss_fct = CrossEntropyLoss()
            # Only keep active parts of the loss
            if attention_mask is not None:
                active_loss = attention_mask.view(-1) == 1
                active_logits = logits.view(-1, self.num_labels)
                active_labels = torch.where(
                    active_loss, labels.view(-1), torch.tensor(loss_fct.ignore_index).type_as(labels)
                )
                loss = loss_fct(active_logits, active_labels)
            else:
                loss = loss_fct(logits.view(-1, self.num_labels), labels.view(-1))
            outputs = (loss,) + outputs

        return outputs  # (loss), scores, (hidden_states), (attentions)


@add_start_docstrings(
    """Longformer Model with a multiple choice classification head on top (a linear layer on top of
    the pooled output and a softmax) e.g. for RocStories/SWAG tasks. """,
    LONGFORMER_START_DOCSTRING,
)
class LongformerForMultipleChoice(BertPreTrainedModel):
    config_class = LongformerConfig
    base_model_prefix = "longformer"

    def __init__(self, config):
        super().__init__(config)

        self.longformer = LongformerModel(config)
        self.dropout = nn.Dropout(config.hidden_dropout_prob)
        self.classifier = nn.Linear(config.hidden_size, 1)

        self.init_weights()

    @add_start_docstrings_to_callable(LONGFORMER_INPUTS_DOCSTRING.format("(batch_size, num_choices, sequence_length)"))
    def forward(
        self,
        input_ids=None,
        token_type_ids=None,
        attention_mask=None,
        global_attention_mask=None,
        labels=None,
        position_ids=None,
        inputs_embeds=None,
        output_attentions=None,
    ):
        r"""
        labels (:obj:`torch.LongTensor` of shape :obj:`(batch_size,)`, `optional`, defaults to :obj:`None`):
            Labels for computing the multiple choice classification loss.
            Indices should be in ``[0, ..., num_choices]`` where `num_choices` is the size of the second dimension
            of the input tensors. (see `input_ids` above)

    Returns:
        :obj:`tuple(torch.FloatTensor)` comprising various elements depending on the configuration (:class:`~transformers.RobertaConfig`) and inputs:
        loss (:obj:`torch.FloatTensor`` of shape `(1,)`, `optional`, returned when :obj:`labels` is provided):
            Classification loss.
        classification_scores (:obj:`torch.FloatTensor` of shape :obj:`(batch_size, num_choices)`):
            `num_choices` is the second dimension of the input tensors. (see `input_ids` above).

            Classification scores (before SoftMax).
        hidden_states (:obj:`tuple(torch.FloatTensor)`, `optional`, returned when ``config.output_hidden_states=True``):
            Tuple of :obj:`torch.FloatTensor` (one for the output of the embeddings + one for the output of each layer)
            of shape :obj:`(batch_size, sequence_length, hidden_size)`.

            Hidden-states of the model at the output of each layer plus the initial embedding outputs.
        attentions (:obj:`tuple(torch.FloatTensor)`, `optional`, returned when ``output_attentions=True`` is passed or ``config.output_attentions=True``):
            Tuple of :obj:`torch.FloatTensor` (one for each layer) of shape
            :obj:`(batch_size, num_heads, sequence_length, sequence_length)`.

            Attentions weights after the attention softmax, used to compute the weighted average in the self-attention
            heads.

    Examples::

        from transformers import LongformerTokenizer, LongformerForMultipleChoice
        import torch

        tokenizer = LongformerTokenizer.from_pretrained('allenai/longformer-base-4096')
        model = LongformerForMultipleChoice.from_pretrained('allenai/longformer-base-4096')
        # context = "The dog is cute" | choice = "the dog" / "the cat"
        choices = [("The dog is cute", "the dog"), ("The dog is cute", "the cat")]
        input_ids = torch.tensor([tokenizer.encode(s[0], s[1], add_special_tokens=True) for s in choices]).unsqueeze(0)  # Batch size 1, 2 choices
        labels = torch.tensor(1).unsqueeze(0)  # Batch size 1

        # global attention is automatically put on "the dog" and "the cat"
        outputs = model(input_ids, labels=labels)
        loss, classification_scores = outputs[:2]

        """
        num_choices = input_ids.shape[1] if input_ids is not None else inputs_embeds.shape[1]

        # set global attention on question tokens
        if global_attention_mask is None:
            logger.info("Initializing global attention on multiple choice...")
            # put global attention on all tokens after `config.sep_token_id`
            global_attention_mask = torch.stack(
                [
                    _compute_global_attention_mask(input_ids[:, i], self.config.sep_token_id, before_sep_token=False)
                    for i in range(num_choices)
                ],
                dim=1,
            )

        flat_input_ids = input_ids.view(-1, input_ids.size(-1)) if input_ids is not None else None
        flat_position_ids = position_ids.view(-1, position_ids.size(-1)) if position_ids is not None else None
        flat_token_type_ids = token_type_ids.view(-1, token_type_ids.size(-1)) if token_type_ids is not None else None
        flat_attention_mask = attention_mask.view(-1, attention_mask.size(-1)) if attention_mask is not None else None
        flat_global_attention_mask = (
            global_attention_mask.view(-1, global_attention_mask.size(-1))
            if global_attention_mask is not None
            else None
        )
        flat_inputs_embeds = (
            inputs_embeds.view(-1, inputs_embeds.size(-2), inputs_embeds.size(-1))
            if inputs_embeds is not None
            else None
        )

        outputs = self.longformer(
            flat_input_ids,
            position_ids=flat_position_ids,
            token_type_ids=flat_token_type_ids,
            attention_mask=flat_attention_mask,
            global_attention_mask=flat_global_attention_mask,
            inputs_embeds=flat_inputs_embeds,
            output_attentions=output_attentions,
        )
        pooled_output = outputs[1]

        pooled_output = self.dropout(pooled_output)
        logits = self.classifier(pooled_output)
        reshaped_logits = logits.view(-1, num_choices)

        outputs = (reshaped_logits,) + outputs[2:]  # add hidden states and attention if they are here

        if labels is not None:
            loss_fct = CrossEntropyLoss()
            loss = loss_fct(reshaped_logits, labels)
            outputs = (loss,) + outputs

        return outputs  # (loss), reshaped_logits, (hidden_states), (attentions)
