# Supplementary material
Source: ML conference proceedings conference paper supplement (https://aclanthology.org/2020.findings-emnlp.419)
Supplement: OptionalSupplementaryMaterial [file 2020.findings-emnlp.419.OptionalSupplementaryMaterial.zip › AttentionGuidance-main/attention_guidance/src/transformers/trainer_utils.py]

from typing import Dict, NamedTuple, Optional

import numpy as np


class EvalPrediction(NamedTuple):
    """
    Evaluation output (always contains labels), to be used
    to compute metrics.
    """

    predictions: np.ndarray
    label_ids: np.ndarray


class PredictionOutput(NamedTuple):
    predictions: np.ndarray
    label_ids: Optional[np.ndarray]
    metrics: Optional[Dict[str, float]]


class TrainOutput(NamedTuple):
    global_step: int
    training_loss: float


PREFIX_CHECKPOINT_DIR = "checkpoint"
