# Supplementary material
Source: ML conference proceedings conference paper supplement (https://aclanthology.org/2020.findings-emnlp.419)
Supplement: OptionalSupplementaryMaterial [file 2020.findings-emnlp.419.OptionalSupplementaryMaterial.zip › AttentionGuidance-main/linguistic_probing/reflexive.txt]

our prince will love himself	4	0 1
her girl could hurt herself	4	0 1
my nun would accept herself	4	0 1
the girl would kick herself	4	0 1
our princess would accept herself	4	0 1
the actor who could smile could hurt himself	7	0 1
her actress can comfort herself	4	0 1
your king would accept himself	4	0 1
our queen could clean herself	4	0 1
the king could kick himself	4	0 1
our princess will remember herself	4	0 1
our woman will comfort herself	4	0 1
her aunt can kick herself	4	0 1
our brother would dress himself	4	0 1
our sister will hurt herself	4	0 1
our wizard could love himself	4	0 1
the nun could kick herself	4	0 1
some lord will clean himself	4	0 1
the girl would love herself	4	0 1
the actress can remember herself	4	0 1
the wife can hurt herself	4	0 1
our actress who could change could remember herself	7	0 1
her boy would love himself	4	0 1
the lord could dress himself	4	0 1
our wife can remember herself	4	0 1
the princess can accept herself	4	0 1
her aunt can hurt herself	4	0 1
some witch could remember herself	4	0 1
my king could love himself	4	0 1
the queen would comfort herself	4	0 1
my wife can dress herself	4	0 1
the uncle who could eat could hit himself	7	0 1
some wizard will comfort himself	4	0 1
your king that would read would accept himself	7	0 1
the witch who will wait will hit herself	7	0 1
my queen will love herself	4	0 1
your princess can kick herself	4	0 1
some man could hit himself	4	0 1
our actress can accept herself	4	0 1
the brother can accept himself	4	0 1
my wizard who could change could remember himself	7	0 1
the witch would hit herself	4	0 1
your aunt can accept herself	4	0 1
your woman would love herself	4	0 1
our lord will dress himself	4	0 1
her niece will love herself	4	0 1
your boy could dress himself	4	0 1
some actor could remember himself	4	0 1
the wife could accept herself	4	0 1
your wizard would clean himself	4	0 1
some boy that could wait would clean himself	7	0 1
some prince will hit himself	4	0 1
some aunt could kick herself	4	0 1
the brother who can wait could accept himself	7	0 1
her lady will dress herself	4	0 1
her lady would hurt herself	4	0 1
some sister can hurt herself	4	0 1
my witch would remember herself	4	0 1
my lord could comfort himself	4	0 1
the nephew can remember himself	4	0 1
your actress who can change will dress herself	7	0 1
your witch could hurt herself	4	0 1
her monk will accept himself	4	0 1
our witch can hit herself	4	0 1
some nun will accept herself	4	0 1
some niece can remember herself	4	0 1
the lady would remember herself	4	0 1
the lady could hit herself	4	0 1
your sister would hit herself	4	0 1
my wizard can clean himself	4	0 1
her lord will remember himself	4	0 1
my king will clean himself	4	0 1
the witch could love herself	4	0 1
her lord would remember himself	4	0 1
her witch can hit herself	4	0 1
some mother would hurt herself	4	0 1
your husband can dress himself	4	0 1
her brother could kick himself	4	0 1
her queen can accept herself	4	0 1
my sister will love herself	4	0 1
the nun who could read could hurt herself	7	0 1
your actress can hurt herself	4	0 1
some actor will hurt himself	4	0 1
some niece will clean herself	4	0 1
some boy could hit himself	4	0 1
her husband can comfort himself	4	0 1
your lady can hurt herself	4	0 1
your girl will accept herself	4	0 1
your father will remember himself	4	0 1
my monk will hurt himself	4	0 1
your lady will hit herself	4	0 1
her princess would love herself	4	0 1
the queen would remember herself	4	0 1
the brother can comfort himself	4	0 1
our aunt can hit herself	4	0 1
some boy would comfort himself	4	0 1
our niece who would move will hit herself	7	0 1
her lord that could move could remember himself	7	0 1
the monk would kick himself	4	0 1
her nun who could cry can comfort herself	7	0 1
her actor would love himself	4	0 1
my woman that could swim would hurt herself	7	0 1
my boy could comfort himself	4	0 1
our mother will comfort herself	4	0 1
our husband can hurt himself	4	0 1
our niece would love herself	4	0 1
her niece could remember herself	4	0 1
the princess can dress herself	4	0 1
her brother who would move would clean himself	7	0 1
some prince can love himself	4	0 1
your monk that could eat could comfort himself	7	0 1
her wizard that will read could comfort himself	7	0 1
some boy could clean himself	4	0 1
some husband will comfort himself	4	0 1
our king can accept himself	4	0 1
her monk would clean himself	4	0 1
the mother would hurt herself	4	0 1
some boy could dress himself	4	0 1
some wife that can sleep could remember herself	7	0 1
our witch can love herself	4	0 1
your uncle can hurt himself	4	0 1
our actor would dress himself	4	0 1
your uncle can love himself	4	0 1
the nephew would accept himself	4	0 1
her aunt will dress herself	4	0 1
my king would accept himself	4	0 1
some wife would accept herself	4	0 1
some queen will remember herself	4	0 1
the husband can comfort himself	4	0 1
your actor could kick himself	4	0 1
some nun who can wait would dress herself	7	0 1
her woman would clean herself	4	0 1
your princess could accept herself	4	0 1
the wife could dress herself	4	0 1
some king will hurt himself	4	0 1
the wizard can hurt himself	4	0 1
the woman could hurt herself	4	0 1
the sister could love herself	4	0 1
her uncle can remember himself	4	0 1
the boy that can smile will dress himself	7	0 1
her king would clean himself	4	0 1
her aunt will comfort herself	4	0 1
our mother can remember herself	4	0 1
the king could remember himself	4	0 1
the lord can remember himself	4	0 1
her king could kick himself	4	0 1
your boy can hit himself	4	0 1
some nephew could kick himself	4	0 1
some lord could love himself	4	0 1
some prince would accept himself	4	0 1
her monk could clean himself	4	0 1
the husband would remember himself	4	0 1
the girl will remember herself	4	0 1
the brother will hit himself	4	0 1
the girl that could cry can hit herself	7	0 1
our witch could accept herself	4	0 1
the actress can love herself	4	0 1
my niece who can sleep can accept herself	7	0 1
our lady would dress herself	4	0 1
my man that can eat would hurt himself	7	0 1
some niece could clean herself	4	0 1
the niece that can smile can kick herself	7	0 1
the man will comfort himself	4	0 1
the lord who could swim can hurt himself	7	0 1
your father would dress himself	4	0 1
the actress would dress herself	4	0 1
her wife can accept herself	4	0 1
her mother can dress herself	4	0 1
the girl will dress herself	4	0 1
her wizard would accept himself	4	0 1
the nun will clean herself	4	0 1
your sister can remember herself	4	0 1
some lady would comfort herself	4	0 1
the princess could clean herself	4	0 1
my witch would hit herself	4	0 1
my aunt could dress herself	4	0 1
our father can love himself	4	0 1
your monk would dress himself	4	0 1
our lady will clean herself	4	0 1
her husband would comfort himself	4	0 1
my aunt could comfort herself	4	0 1
the lady who could read would remember herself	7	0 1
the woman will dress herself	4	0 1
her wife would love herself	4	0 1
her wizard who will cry will remember himself	7	0 1
my niece will accept herself	4	0 1
your uncle who would move would love himself	7	0 1
our niece can hit herself	4	0 1
her man could remember himself	4	0 1
her girl will accept herself	4	0 1
some boy could kick himself	4	0 1
your king will dress himself	4	0 1
her witch will clean herself	4	0 1
our father would comfort himself	4	0 1
the boy would dress himself	4	0 1
my nephew can clean himself	4	0 1
my girl will hurt herself	4	0 1
our queen can kick herself	4	0 1
our wizard will comfort himself	4	0 1
the witch can comfort herself	4	0 1
her lady could hurt herself	4	0 1
her mother will remember herself	4	0 1
the girl would comfort herself	4	0 1
her nun can hit herself	4	0 1
my lord can accept himself	4	0 1
some wizard could comfort himself	4	0 1
your queen could love herself	4	0 1
some actress will hit herself	4	0 1
my nephew will dress himself	4	0 1
your aunt would hit herself	4	0 1
your woman who could smile can kick herself	7	0 1
her sister could clean herself	4	0 1
some man would dress himself	4	0 1
your lady could kick herself	4	0 1
some mother can comfort herself	4	0 1
her queen can clean herself	4	0 1
the woman will love herself	4	0 1
some brother could remember himself	4	0 1
the witch that could cry would love herself	7	0 1
your lord could love himself	4	0 1
some mother will dress herself	4	0 1
some man that can sleep could accept himself	7	0 1
some witch could comfort herself	4	0 1
her aunt will kick herself	4	0 1
some actress could accept herself	4	0 1
some actress can dress herself	4	0 1
our monk can accept himself	4	0 1
some actress that would swim can accept herself	7	0 1
her wife can remember herself	4	0 1
some woman could comfort herself	4	0 1
our boy will kick himself	4	0 1
my girl who could sleep will clean herself	7	0 1
my king can hurt himself	4	0 1
some wife will hit herself	4	0 1
the queen will accept herself	4	0 1
my girl could love herself	4	0 1
her actress who would smile could remember herself	7	0 1
her witch would hit herself	4	0 1
the brother will clean himself	4	0 1
my actor will love himself	4	0 1
her brother who could smile will hurt himself	7	0 1
my mother could remember herself	4	0 1
her actress could comfort herself	4	0 1
some woman will comfort herself	4	0 1
the nun that would move can accept herself	7	0 1
my wizard can hurt himself	4	0 1
our aunt that could change would dress herself	7	0 1
her actor can comfort himself	4	0 1
my mother will accept herself	4	0 1
the niece would comfort herself	4	0 1
her wizard could kick himself	4	0 1
your niece could accept herself	4	0 1
our girl who could cry could remember herself	7	0 1
some husband would kick himself	4	0 1
our aunt who will change will dress herself	7	0 1
some lady will comfort herself	4	0 1
your man would remember himself	4	0 1
our lord will hit himself	4	0 1
our uncle will hit himself	4	0 1
her king will remember himself	4	0 1
your niece who would smile could kick herself	7	0 1
my actor will hurt himself	4	0 1
some wizard will clean himself	4	0 1
my sister can love herself	4	0 1
your aunt that will wait would love herself	7	0 1
our nun can hit herself	4	0 1
some sister could clean herself	4	0 1
my king can accept himself	4	0 1
our wife would accept herself	4	0 1
my man would dress himself	4	0 1
your witch who will move will hurt herself	7	0 1
the uncle will remember himself	4	0 1
the mother could accept herself	4	0 1
our uncle can clean himself	4	0 1
her wizard can clean himself	4	0 1
the girl can remember herself	4	0 1
your lady would hit herself	4	0 1
some wizard would accept himself	4	0 1
some wizard could love himself	4	0 1
my nephew could hit himself	4	0 1
your lady can kick herself	4	0 1
your wife can love herself	4	0 1
our witch would accept herself	4	0 1
your princess could comfort herself	4	0 1
my king who would sleep can hurt himself	7	0 1
your nun could clean herself	4	0 1
her actor could kick himself	4	0 1
her actress would dress herself	4	0 1
our witch could kick herself	4	0 1
our aunt will comfort herself	4	0 1
our husband would accept himself	4	0 1
our husband would comfort himself	4	0 1
my lady will clean herself	4	0 1
my lady will accept herself	4	0 1
our mother could remember herself	4	0 1
the prince can comfort himself	4	0 1
the witch can kick herself	4	0 1
the nephew will hit himself	4	0 1
your uncle could dress himself	4	0 1
some niece can accept herself	4	0 1
my uncle can kick himself	4	0 1
some woman can remember herself	4	0 1
some girl would remember herself	4	0 1
my niece will hit herself	4	0 1
our lady can hurt herself	4	0 1
the lord will kick himself	4	0 1
her wife could dress herself	4	0 1
some husband will hurt himself	4	0 1
some lady who would smile will clean herself	7	0 1
her prince can remember himself	4	0 1
your girl could kick herself	4	0 1
some girl will hit herself	4	0 1
your sister could clean herself	4	0 1
my witch that could move can dress herself	7	0 1
the niece would love herself	4	0 1
our wife that could move can clean herself	7	0 1
my niece would clean herself	4	0 1
the boy will accept himself	4	0 1
my prince that will sleep will love himself	7	0 1
some aunt will love herself	4	0 1
your husband that could eat can hurt himself	7	0 1
some lord can dress himself	4	0 1
some lord would dress himself	4	0 1
our wife will clean herself	4	0 1
her lady will kick herself	4	0 1
our sister can accept herself	4	0 1
the father would hit himself	4	0 1
our mother would remember herself	4	0 1
our sister could remember herself	4	0 1
your nun who could eat could accept herself	7	0 1
my girl will clean herself	4	0 1
some man can hurt himself	4	0 1
the boy can hit himself	4	0 1
the father could love himself	4	0 1
your man will hurt himself	4	0 1
your uncle could clean himself	4	0 1
her actress would love herself	4	0 1
some king that could change would remember himself	7	0 1
her lord can hit himself	4	0 1
the girl could love herself	4	0 1
my actor can kick himself	4	0 1
her queen can dress herself	4	0 1
some witch that would smile will kick herself	7	0 1
my wife can comfort herself	4	0 1
your niece can love herself	4	0 1
the actor who will wait can love himself	7	0 1
her father will clean himself	4	0 1
her boy could hurt himself	4	0 1
your niece can accept herself	4	0 1
some princess will dress herself	4	0 1
your lord would accept himself	4	0 1
her niece would accept herself	4	0 1
our nun will comfort herself	4	0 1
my lady who could move could clean herself	7	0 1
my nephew can hit himself	4	0 1
my aunt would clean herself	4	0 1
your nephew could clean himself	4	0 1
my uncle can accept himself	4	0 1
her witch can love herself	4	0 1
some uncle will remember himself	4	0 1
my witch will accept herself	4	0 1
my actress will accept herself	4	0 1
her father would comfort himself	4	0 1
your wizard who could change can love himself	7	0 1
the king who could smile would hit himself	7	0 1
some sister who can move will hurt herself	7	0 1
some uncle will hit himself	4	0 1
her actor will kick himself	4	0 1
your lord could comfort himself	4	0 1
your actress would comfort herself	4	0 1
some queen who will read will comfort herself	7	0 1
some monk would comfort himself	4	0 1
my husband can comfort himself	4	0 1
her nun will dress herself	4	0 1
some princess will accept herself	4	0 1
our boy would accept himself	4	0 1
her brother will dress himself	4	0 1
my prince will dress himself	4	0 1
my girl can remember herself	4	0 1
the brother that can swim would dress himself	7	0 1
some king can hit himself	4	0 1
my father could hit himself	4	0 1
your girl can accept herself	4	0 1
our wife could comfort herself	4	0 1
her niece could accept herself	4	0 1
my wizard would kick himself	4	0 1
my girl could clean herself	4	0 1
her husband will comfort himself	4	0 1
your brother could remember himself	4	0 1
the king would love himself	4	0 1
my actress could accept herself	4	0 1
your monk will love himself	4	0 1
your princess would accept herself	4	0 1
the monk could dress himself	4	0 1
the boy will hit himself	4	0 1
my brother can hit himself	4	0 1
my nephew would comfort himself	4	0 1
her king can hurt himself	4	0 1
your king will comfort himself	4	0 1
my uncle would remember himself	4	0 1
my monk will clean himself	4	0 1
my monk would dress himself	4	0 1
our aunt would clean herself	4	0 1
her prince would remember himself	4	0 1
the nephew would clean himself	4	0 1
the man could remember himself	4	0 1
your boy could love himself	4	0 1
our lady would remember herself	4	0 1
the king could love himself	4	0 1
my mother would remember herself	4	0 1
the wizard who can swim will clean himself	7	0 1
her nephew will clean himself	4	0 1
the nun would hit herself	4	0 1
her queen would dress herself	4	0 1
your uncle would comfort himself	4	0 1
our queen could kick herself	4	0 1
some girl will hurt herself	4	0 1
her husband will remember himself	4	0 1
her uncle that would wait will remember himself	7	0 1
some girl could love herself	4	0 1
our man could clean himself	4	0 1
her sister would kick herself	4	0 1
her boy can hurt himself	4	0 1
the prince can accept himself	4	0 1
her lady could love herself	4	0 1
your witch could kick herself	4	0 1
her witch could hit herself	4	0 1
our lord would clean himself	4	0 1
the lady could remember herself	4	0 1
our aunt that could change can hit herself	7	0 1
the nun would dress herself	4	0 1
the lord could hurt himself	4	0 1
your brother who would smile can kick himself	7	0 1
my king could dress himself	4	0 1
your lady could dress herself	4	0 1
the aunt could accept herself	4	0 1
our princess would dress herself	4	0 1
her aunt can dress herself	4	0 1
the sister that will sleep could hurt herself	7	0 1
your woman would hurt herself	4	0 1
some wife who would read could accept herself	7	0 1
her monk can dress himself	4	0 1
her aunt who can swim will hurt herself	7	0 1
my husband who can cry can dress himself	7	0 1
some prince could love himself	4	0 1
my wizard could accept himself	4	0 1
our woman will clean herself	4	0 1
our prince would dress himself	4	0 1
my nephew will accept himself	4	0 1
the aunt would hurt herself	4	0 1
her aunt would comfort herself	4	0 1
some aunt would comfort herself	4	0 1
her prince would comfort himself	4	0 1
our witch will clean herself	4	0 1
my king can love himself	4	0 1
the lord would accept himself	4	0 1
her king could accept himself	4	0 1
my brother could dress himself	4	0 1
your aunt would remember herself	4	0 1
my nephew can dress himself	4	0 1
my father would hit himself	4	0 1
your lady can remember herself	4	0 1
her man would clean himself	4	0 1
some witch who could wait could hit herself	7	0 1
my husband will hurt himself	4	0 1
some sister could hurt herself	4	0 1
our niece that would move could hurt herself	7	0 1
some aunt will dress herself	4	0 1
her uncle could remember himself	4	0 1
my aunt could love herself	4	0 1
her sister will kick herself	4	0 1
my king can hit himself	4	0 1
our nephew will remember himself	4	0 1
her woman will love herself	4	0 1
some king would dress himself	4	0 1
the uncle will clean himself	4	0 1
the man could clean himself	4	0 1
the man that would eat can hurt himself	7	0 1
our wizard can accept himself	4	0 1
our aunt that would smile could hurt herself	7	0 1
some husband can hurt himself	4	0 1
my woman would hit herself	4	0 1
my wife will hurt herself	4	0 1
some husband could hit himself	4	0 1
the woman that could eat can clean herself	7	0 1
her princess who would move will accept herself	7	0 1
our prince would hurt himself	4	0 1
our girl could hit herself	4	0 1
my monk would hurt himself	4	0 1
your actor could hit himself	4	0 1
your actor will dress himself	4	0 1
my woman will accept herself	4	0 1
her niece will kick herself	4	0 1
our princess could hurt herself	4	0 1
my boy will clean himself	4	0 1
my lady can hit herself	4	0 1
her wizard could comfort himself	4	0 1
my nun who can read can remember herself	7	0 1
the wizard could comfort himself	4	0 1
her lady who could move could love herself	7	0 1
our lord would dress himself	4	0 1
the brother would remember himself	4	0 1
the woman would hurt herself	4	0 1
some woman can comfort herself	4	0 1
some actor will comfort himself	4	0 1
some actor would clean himself	4	0 1
your husband will kick himself	4	0 1
the prince would remember himself	4	0 1
some nun would love herself	4	0 1
my boy can hurt himself	4	0 1
the wife would accept herself	4	0 1
our father can comfort himself	4	0 1
your sister that would smile will kick herself	7	0 1
the father will hurt himself	4	0 1
my witch could hit herself	4	0 1
some woman who can sleep can hit herself	7	0 1
her actor will hurt himself	4	0 1
some lord can hurt himself	4	0 1
our wizard could clean himself	4	0 1
some actress could remember herself	4	0 1
her wife that would cry will remember herself	7	0 1
your brother would hurt himself	4	0 1
some lord could kick himself	4	0 1
my father that can cry will comfort himself	7	0 1
the husband would accept himself	4	0 1
our husband would love himself	4	0 1
some mother could remember herself	4	0 1
our niece would dress herself	4	0 1
the nephew who can move can hit himself	7	0 1
my nun will kick herself	4	0 1
the boy can accept himself	4	0 1
your queen can dress herself	4	0 1
my wizard would remember himself	4	0 1
your girl that will wait would hit herself	7	0 1
the actor that can cry would hit himself	7	0 1
your brother could love himself	4	0 1
some lord would hurt himself	4	0 1
some nephew that would change would hit himself	7	0 1
her brother could hit himself	4	0 1
her nun could dress herself	4	0 1
her sister could kick herself	4	0 1
your man would hurt himself	4	0 1
the lady will clean herself	4	0 1
the boy will hurt himself	4	0 1
your father will clean himself	4	0 1
her princess would hit herself	4	0 1
the uncle will dress himself	4	0 1
her witch could remember herself	4	0 1
my father can comfort himself	4	0 1
your monk could kick himself	4	0 1
her father will love himself	4	0 1
some husband can hit himself	4	0 1
your witch can hit herself	4	0 1
your queen could remember herself	4	0 1
your niece could kick herself	4	0 1
some boy could accept himself	4	0 1
the boy can hurt himself	4	0 1
some queen who can move could remember herself	7	0 1
our uncle would hit himself	4	0 1
my lord would love himself	4	0 1
the actress could hit herself	4	0 1
my monk will love himself	4	0 1
my father would remember himself	4	0 1
the princess can hurt herself	4	0 1
some prince can hurt himself	4	0 1
my lord will hurt himself	4	0 1
some niece who could change would remember herself	7	0 1
my queen would remember herself	4	0 1
our wizard could dress himself	4	0 1
some husband could kick himself	4	0 1
the king would hit himself	4	0 1
the lady will hit herself	4	0 1
my mother could accept herself	4	0 1
some niece would remember herself	4	0 1
some uncle could dress himself	4	0 1
the mother can accept herself	4	0 1
the uncle would hurt himself	4	0 1
my father would dress himself	4	0 1
the actor would comfort himself	4	0 1
some wife who could cry will comfort herself	7	0 1
my actor can dress himself	4	0 1
your queen could accept herself	4	0 1
the man can remember himself	4	0 1
your man can hurt himself	4	0 1
her queen could accept herself	4	0 1
some father who could sleep can comfort himself	7	0 1
our brother can comfort himself	4	0 1
the lady would hit herself	4	0 1
your queen could comfort herself	4	0 1
my nephew will remember himself	4	0 1
her sister could hit herself	4	0 1
some nephew will hurt himself	4	0 1
my girl will comfort herself	4	0 1
some king could kick himself	4	0 1
some niece could dress herself	4	0 1
my monk will remember himself	4	0 1
the prince can love himself	4	0 1
the woman can accept herself	4	0 1
some aunt who would sleep will dress herself	7	0 1
some uncle who could sleep will kick himself	7	0 1
our king will remember himself	4	0 1
the wizard could remember himself	4	0 1
my niece can dress herself	4	0 1
some father who could cry will hit himself	7	0 1
her boy could kick himself	4	0 1
her prince will hit himself	4	0 1
some nephew that can sleep could kick himself	7	0 1
the wizard will dress himself	4	0 1
some husband can dress himself	4	0 1
some woman would accept herself	4	0 1
her husband will clean himself	4	0 1
your lord who will wait will clean himself	7	0 1
my aunt would remember herself	4	0 1
my uncle would hurt himself	4	0 1
my man who could eat could hit himself	7	0 1
some sister would accept herself	4	0 1
her lord will love himself	4	0 1
the lady would kick herself	4	0 1
my mother would clean herself	4	0 1
your mother would accept herself	4	0 1
my boy that will change will hurt himself	7	0 1
the queen could accept herself	4	0 1
your wizard will remember himself	4	0 1
my father will love himself	4	0 1
our nun would hit herself	4	0 1
the actress could hurt herself	4	0 1
your man can dress himself	4	0 1
your woman could remember herself	4	0 1
the uncle can kick himself	4	0 1
your princess would clean herself	4	0 1
my husband would remember himself	4	0 1
our queen will comfort herself	4	0 1
some actor will love himself	4	0 1
my sister would remember herself	4	0 1
her niece who would sleep would dress herself	7	0 1
my queen would clean herself	4	0 1
some mother will love herself	4	0 1
your lord will love himself	4	0 1
our boy would hurt himself	4	0 1
some uncle will love himself	4	0 1
our lord could remember himself	4	0 1
some witch would love herself	4	0 1
our mother can dress herself	4	0 1
some actress can accept herself	4	0 1
some uncle can dress himself	4	0 1
the brother will accept himself	4	0 1
some actor can hit himself	4	0 1
her wife would hit herself	4	0 1
my wife could love herself	4	0 1
some prince who will change could dress himself	7	0 1
the monk who would smile would remember himself	7	0 1
some aunt would accept herself	4	0 1
the prince will dress himself	4	0 1
my king can dress himself	4	0 1
my sister could remember herself	4	0 1
our sister can dress herself	4	0 1
her brother will kick himself	4	0 1
the girl could remember herself	4	0 1
my man can clean himself	4	0 1
your sister will remember herself	4	0 1
the wizard would clean himself	4	0 1
my wife will comfort herself	4	0 1
her father can comfort himself	4	0 1
her monk would hit himself	4	0 1
my wizard could dress himself	4	0 1
some queen could love herself	4	0 1
our niece can love herself	4	0 1
our niece that would move will love herself	7	0 1
my brother would hit himself	4	0 1
her man can clean himself	4	0 1
the boy would hit himself	4	0 1
my nun can hurt herself	4	0 1
her man can comfort himself	4	0 1
my lord will clean himself	4	0 1
your actor would hurt himself	4	0 1
the king will comfort himself	4	0 1
her wizard can remember himself	4	0 1
our sister can hit herself	4	0 1
your actor will accept himself	4	0 1
your princess will clean herself	4	0 1
some princess could dress herself	4	0 1
our nephew will love himself	4	0 1
the queen would love herself	4	0 1
her mother would clean herself	4	0 1
the mother can clean herself	4	0 1
her princess will love herself	4	0 1
the woman would comfort herself	4	0 1
some princess would remember herself	4	0 1
your husband can comfort himself	4	0 1
the man can kick himself	4	0 1
the boy will love himself	4	0 1
the brother could comfort himself	4	0 1
some wife can comfort herself	4	0 1
some witch would remember herself	4	0 1
our wife who can wait could comfort herself	7	0 1
the princess would dress herself	4	0 1
some boy would remember himself	4	0 1
the father would clean himself	4	0 1
her wizard would dress himself	4	0 1
some woman will clean herself	4	0 1
your girl will hurt herself	4	0 1
our girl could hurt herself	4	0 1
your prince would dress himself	4	0 1
the niece could remember herself	4	0 1
her boy could clean himself	4	0 1
my aunt would comfort herself	4	0 1
her husband could comfort himself	4	0 1
some sister will love herself	4	0 1
the uncle could kick himself	4	0 1
my woman would dress herself	4	0 1
our mother will kick herself	4	0 1
the woman could hit herself	4	0 1
the wizard that can change will clean himself	7	0 1
my princess that will move could accept herself	7	0 1
our brother who could sleep can comfort himself	7	0 1
her prince that could move could clean himself	7	0 1
her monk that would change would kick himself	7	0 1
her niece who would wait can clean herself	7	0 1
our nephew can love himself	4	0 1
my girl would clean herself	4	0 1
the lady would dress herself	4	0 1
your nephew could accept himself	4	0 1
some princess would comfort herself	4	0 1
our sister will love herself	4	0 1
my lady can clean herself	4	0 1
the lord will comfort himself	4	0 1
her woman that can change could comfort herself	7	0 1
some aunt would remember herself	4	0 1
my king will love himself	4	0 1
my actor could accept himself	4	0 1
my wife can remember herself	4	0 1
some wizard will kick himself	4	0 1
the lord can hit himself	4	0 1
your aunt will comfort herself	4	0 1
our brother will comfort himself	4	0 1
your lord would comfort himself	4	0 1
our nephew can hit himself	4	0 1
my actress can dress herself	4	0 1
some king would clean himself	4	0 1
her husband can hurt himself	4	0 1
some monk would remember himself	4	0 1
some mother would hit herself	4	0 1
our princess will comfort herself	4	0 1
her wife who can smile can kick herself	7	0 1
her actor will clean himself	4	0 1
her lady could dress herself	4	0 1
some nephew that would sleep could hit himself	7	0 1
your nephew will hit himself	4	0 1
some princess will love herself	4	0 1
the brother who would wait can hurt himself	7	0 1
our prince will remember himself	4	0 1
my actress could comfort herself	4	0 1
some sister who could move could dress herself	7	0 1
the actor who can swim can kick himself	7	0 1
some queen can accept herself	4	0 1
my nephew could remember himself	4	0 1
her brother will hit himself	4	0 1
the princess would clean herself	4	0 1
the queen would kick herself	4	0 1
our husband could remember himself	4	0 1
our wife could remember herself	4	0 1
her sister will comfort herself	4	0 1
the nun who will wait could hurt herself	7	0 1
my witch who will sleep could remember herself	7	0 1
some monk would dress himself	4	0 1
our woman could love herself	4	0 1
some wife who can move will love herself	7	0 1
your boy would hurt himself	4	0 1
our princess would hurt herself	4	0 1
her prince would kick himself	4	0 1
my father could comfort himself	4	0 1
our queen who could eat can remember herself	7	0 1
her girl can hit herself	4	0 1
the boy can clean himself	4	0 1
your boy would comfort himself	4	0 1
our wizard could accept himself	4	0 1
my princess will clean herself	4	0 1
my princess could kick herself	4	0 1
some niece can dress herself	4	0 1
my woman that could sleep could comfort herself	7	0 1
our sister can love herself	4	0 1
her husband could accept himself	4	0 1
your uncle would dress himself	4	0 1
some actor would comfort himself	4	0 1
your monk would remember himself	4	0 1
your actress would accept herself	4	0 1
her monk would comfort himself	4	0 1
some nephew would hit himself	4	0 1
some husband could comfort himself	4	0 1
your nephew who will sleep can kick himself	7	0 1
some husband could love himself	4	0 1
my father that could sleep would remember himself	7	0 1
her actress who could change would hurt herself	7	0 1
your monk will clean himself	4	0 1
our witch who would sleep can accept herself	7	0 1
your sister can hurt herself	4	0 1
some niece will hurt herself	4	0 1
her lord who can swim would comfort himself	7	0 1
our girl would clean herself	4	0 1
some husband will clean himself	4	0 1
your actress could dress herself	4	0 1
the witch could accept herself	4	0 1
some wizard would hit himself	4	0 1
our actress would hurt herself	4	0 1
her woman that would swim would hit herself	7	0 1
her monk will clean himself	4	0 1
the sister would comfort herself	4	0 1
the father can comfort himself	4	0 1
some mother will comfort herself	4	0 1
her princess could kick herself	4	0 1
my queen would hit herself	4	0 1
my lady would accept herself	4	0 1
her monk will hit himself	4	0 1
the actor would dress himself	4	0 1
her man will love himself	4	0 1
some actress will love herself	4	0 1
my actor can love himself	4	0 1
your boy who could sleep could love himself	7	0 1
the lady will kick herself	4	0 1
the lady would love herself	4	0 1
your queen would hurt herself	4	0 1
our boy would comfort himself	4	0 1
some prince can comfort himself	4	0 1
our prince could hit himself	4	0 1
our aunt can hurt herself	4	0 1
her husband would kick himself	4	0 1
our nun could comfort herself	4	0 1
my sister will accept herself	4	0 1
her nun can remember herself	4	0 1
your brother could accept himself	4	0 1
her lord would clean himself	4	0 1
the prince can dress himself	4	0 1
some prince could accept himself	4	0 1
some prince would remember himself	4	0 1
my nephew would remember himself	4	0 1
her father will dress himself	4	0 1
your man can clean himself	4	0 1
your sister will hurt herself	4	0 1
your boy would clean himself	4	0 1
some niece that could read will dress herself	7	0 1
your lady will accept herself	4	0 1
our father would clean himself	4	0 1
her aunt that will smile could remember herself	7	0 1
the actor can accept himself	4	0 1
our actress can hit herself	4	0 1
some wizard could hurt himself	4	0 1
your aunt would love herself	4	0 1
her boy will remember himself	4	0 1
my lord will accept himself	4	0 1
some man can kick himself	4	0 1
your aunt can hurt herself	4	0 1
our lord can remember himself	4	0 1
our prince will clean himself	4	0 1
the father can accept himself	4	0 1
our woman would clean herself	4	0 1
some girl would hurt herself	4	0 1
the woman can dress herself	4	0 1
the witch can remember herself	4	0 1
my wizard would love himself	4	0 1
our nun can hurt herself	4	0 1
the mother could love herself	4	0 1
our aunt will accept herself	4	0 1
the queen would clean herself	4	0 1
our princess can love herself	4	0 1
some niece would hit herself	4	0 1
some queen could clean herself	4	0 1
her queen who will sleep could kick herself	7	0 1
her princess who would wait will comfort herself	7	0 1
our witch will comfort herself	4	0 1
the king could clean himself	4	0 1
my nephew can love himself	4	0 1
your husband can accept himself	4	0 1
the uncle could accept himself	4	0 1
your man will dress himself	4	0 1
my mother would love herself	4	0 1
our queen will dress herself	4	0 1
the aunt that could sleep could dress herself	7	0 1
her nun can kick herself	4	0 1
the lord would comfort himself	4	0 1
your actor could love himself	4	0 1
her husband can remember himself	4	0 1
our woman will dress herself	4	0 1
some queen would comfort herself	4	0 1
the lord can clean himself	4	0 1
our man who would wait will hurt himself	7	0 1
your king would hit himself	4	0 1
her wizard would remember himself	4	0 1
your mother can dress herself	4	0 1
the niece can love herself	4	0 1
her actor that can move would kick himself	7	0 1
the niece could clean herself	4	0 1
my king would clean himself	4	0 1
your witch could clean herself	4	0 1
the girl will comfort herself	4	0 1
the brother who can move would hurt himself	7	0 1
my lady that would sleep could dress herself	7	0 1
her niece will clean herself	4	0 1
your nun can remember herself	4	0 1
some man can accept himself	4	0 1
the wife could comfort herself	4	0 1
my witch could remember herself	4	0 1
our prince can remember himself	4	0 1
some woman can love herself	4	0 1
some woman will love herself	4	0 1
your husband can remember himself	4	0 1
some sister could remember herself	4	0 1
some man could hurt himself	4	0 1
your lord will accept himself	4	0 1
our monk that will change can hit himself	7	0 1
some niece that would change will remember herself	7	0 1
your lord that can eat could kick himself	7	0 1
some woman would kick herself	4	0 1
your sister could kick herself	4	0 1
her lady will hurt herself	4	0 1
some husband can comfort himself	4	0 1
her actress will comfort herself	4	0 1
your lord would clean himself	4	0 1
our man could hit himself	4	0 1
some wizard that could smile can hurt himself	7	0 1
the monk could hit himself	4	0 1
the mother could hit herself	4	0 1
the mother would kick herself	4	0 1
the uncle that will smile will remember himself	7	0 1
her uncle could love himself	4	0 1
her father can accept himself	4	0 1
your prince would comfort himself	4	0 1
her girl who could swim would dress herself	7	0 1
the woman could love herself	4	0 1
some wife that would cry will accept herself	7	0 1
my man could kick himself	4	0 1
the monk can dress himself	4	0 1
my nun who would smile would remember herself	7	0 1
her woman could dress herself	4	0 1
your queen can kick herself	4	0 1
our witch will dress herself	4	0 1
the niece would hit herself	4	0 1
our brother will hit himself	4	0 1
our sister that could wait could hurt herself	7	0 1
her nun can clean herself	4	0 1
the monk would remember himself	4	0 1
your boy would dress himself	4	0 1
my man would remember himself	4	0 1
some father can kick himself	4	0 1
my girl can hit herself	4	0 1
your wife will clean herself	4	0 1
the nephew would hurt himself	4	0 1
the lady could hurt herself	4	0 1
some woman could clean herself	4	0 1
the father will accept himself	4	0 1
your mother can accept herself	4	0 1
the nun will love herself	4	0 1
some wife who could read will hit herself	7	0 1
some nun will dress herself	4	0 1
the father would kick himself	4	0 1
my queen can hurt herself	4	0 1
your mother will clean herself	4	0 1
our actress can hurt herself	4	0 1
my wizard will accept himself	4	0 1
the prince will kick himself	4	0 1
some niece would hurt herself	4	0 1
our sister will comfort herself	4	0 1
my brother could love himself	4	0 1
my girl will hit herself	4	0 1
some mother would remember herself	4	0 1
your princess will comfort herself	4	0 1
my aunt will kick herself	4	0 1
her prince will kick himself	4	0 1
some husband would clean himself	4	0 1
our boy could clean himself	4	0 1
the wife can comfort herself	4	0 1
our nephew would love himself	4	0 1
the monk would hit himself	4	0 1
her lord will accept himself	4	0 1
some wizard who will eat would hit himself	7	0 1
your boy can accept himself	4	0 1
my sister would clean herself	4	0 1
our witch that could swim would hit herself	7	0 1
her man could hit himself	4	0 1
your lady can clean herself	4	0 1
my father could accept himself	4	0 1
some father would accept himself	4	0 1
our prince can love himself	4	0 1
our queen would accept herself	4	0 1
our wife could love herself	4	0 1
some mother will clean herself	4	0 1
some princess could clean herself	4	0 1
some queen can kick herself	4	0 1
some princess can accept herself	4	0 1
your monk would hit himself	4	0 1
the niece could hurt herself	4	0 1
my uncle that will change could hurt himself	7	0 1
our boy can hit himself	4	0 1
her king will hit himself	4	0 1
the wizard will remember himself	4	0 1
some niece will dress herself	4	0 1
my monk will dress himself	4	0 1
my king could kick himself	4	0 1
my husband could comfort himself	4	0 1
your father can remember himself	4	0 1
some princess can kick herself	4	0 1
your queen who would change could comfort herself	7	0 1
the prince would hurt himself	4	0 1
your wizard who will sleep can hit himself	7	0 1
our prince could dress himself	4	0 1
my sister would hurt herself	4	0 1
your princess will love herself	4	0 1
my mother will love herself	4	0 1
your woman can love herself	4	0 1
my aunt that would move would comfort herself	7	0 1
our princess will hurt herself	4	0 1
the aunt could remember herself	4	0 1
my man would love himself	4	0 1
your husband would accept himself	4	0 1
your uncle can clean himself	4	0 1
my lady could hurt herself	4	0 1
your wife would dress herself	4	0 1
her girl who would eat will love herself	7	0 1
my father will remember himself	4	0 1
our brother can hurt himself	4	0 1
my lord that could swim will comfort himself	7	0 1
our king would kick himself	4	0 1
some niece will kick herself	4	0 1
my lady who could swim would kick herself	7	0 1
our lady who could swim would hit herself	7	0 1
some lady that can move will love herself	7	0 1
your nun who can wait can clean herself	7	0 1
some queen could dress herself	4	0 1
our king would comfort himself	4	0 1
our prince can comfort himself	4	0 1
our actress who can smile can comfort herself	7	0 1
the wife will remember herself	4	0 1
our king will comfort himself	4	0 1
our nephew would accept himself	4	0 1
the prince will clean himself	4	0 1
some girl would dress herself	4	0 1
the brother would hurt himself	4	0 1
her witch could dress herself	4	0 1
my mother will hurt herself	4	0 1
the mother will love herself	4	0 1
her woman will clean herself	4	0 1
our prince would clean himself	4	0 1
your man can comfort himself	4	0 1
my prince could clean himself	4	0 1
the queen could comfort herself	4	0 1
her mother would dress herself	4	0 1
my boy will accept himself	4	0 1
your nun would clean herself	4	0 1
some woman could love herself	4	0 1
your wizard would love himself	4	0 1
the actress that would read can remember herself	7	0 1
my lady can love herself	4	0 1
your uncle can remember himself	4	0 1
our nun could remember herself	4	0 1
our girl can hurt herself	4	0 1
our actress could kick herself	4	0 1
some girl could accept herself	4	0 1
some sister would dress herself	4	0 1
my king would kick himself	4	0 1
our woman would accept herself	4	0 1
your woman would clean herself	4	0 1
our uncle that will sleep can hit himself	7	0 1
our nephew would hurt himself	4	0 1
some witch will clean herself	4	0 1
our sister will hit herself	4	0 1
some aunt who can sleep could accept herself	7	0 1
some boy can accept himself	4	0 1
our sister will dress herself	4	0 1
our monk who would cry would kick himself	7	0 1
our husband could kick himself	4	0 1
our king who will move will remember himself	7	0 1
her woman would remember herself	4	0 1
my father can kick himself	4	0 1
your mother could accept herself	4	0 1
some monk could hurt himself	4	0 1
some nephew would love himself	4	0 1
her wizard could remember himself	4	0 1
her girl who would cry will kick herself	7	0 1
the father can kick himself	4	0 1
our wife that will eat would dress herself	7	0 1
her girl could remember herself	4	0 1
her wife will love herself	4	0 1
the lady that will wait would clean herself	7	0 1
her niece that can sleep would clean herself	7	0 1
my queen can remember herself	4	0 1
the king will love himself	4	0 1
our husband could clean himself	4	0 1
our wife would kick herself	4	0 1
some lord will kick himself	4	0 1
the mother would dress herself	4	0 1
my lord can remember himself	4	0 1
your husband would hurt himself	4	0 1
your king could hit himself	4	0 1
some mother who would sleep would hurt herself	7	0 1
some lord that can change can kick himself	7	0 1
some monk that can change will clean himself	7	0 1
some witch would kick herself	4	0 1
her boy that would sleep can dress himself	7	0 1
the brother who can change could hurt himself	7	0 1
your sister will kick herself	4	0 1
some nephew who can sleep could clean himself	7	0 1
your king who can smile would kick himself	7	0 1
some lady can comfort herself	4	0 1
the witch would love herself	4	0 1
my uncle that will cry will comfort himself	7	0 1
my sister that will cry can hit herself	7	0 1
your aunt would clean herself	4	0 1
my uncle would comfort himself	4	0 1
her witch could clean herself	4	0 1
the actor could hit himself	4	0 1
some lord can clean himself	4	0 1
the husband would dress himself	4	0 1
your boy would remember himself	4	0 1
my sister would hit herself	4	0 1
some queen will hit herself	4	0 1
my monk would clean himself	4	0 1
your monk will accept himself	4	0 1
her brother can love himself	4	0 1
her aunt can hit herself	4	0 1
the brother can love himself	4	0 1
our lord could love himself	4	0 1
her nun would dress herself	4	0 1
some husband can love himself	4	0 1
her man will dress himself	4	0 1
my nun could hit herself	4	0 1
some king that will swim could comfort himself	7	0 1
our sister will kick herself	4	0 1
your actor can hit himself	4	0 1
her aunt could remember herself	4	0 1
the actor will hit himself	4	0 1
your wife could hurt herself	4	0 1
your princess would dress herself	4	0 1
her nun could comfort herself	4	0 1
her princess will accept herself	4	0 1
some aunt would clean herself	4	0 1
her wife would clean herself	4	0 1
some girl can clean herself	4	0 1
the man can comfort himself	4	0 1
our nephew who can read could remember himself	7	0 1
some man could accept himself	4	0 1
the king who could smile can comfort himself	7	0 1
my wife who could cry would hurt herself	7	0 1
her wizard who could read will kick himself	7	0 1
some wizard that would sleep would clean himself	7	0 1
her uncle that could cry will kick himself	7	0 1
her boy could comfort himself	4	0 1
your uncle would love himself	4	0 1
her king would dress himself	4	0 1
the girl could hurt herself	4	0 1
our lord that would wait can dress himself	7	0 1
some sister can remember herself	4	0 1
the man would remember himself	4	0 1
your man will kick himself	4	0 1
the actress that will eat will dress herself	7	0 1
our nephew would comfort himself	4	0 1
the witch would accept herself	4	0 1
her brother would love himself	4	0 1
some actor will clean himself	4	0 1
the man will kick himself	4	0 1
the woman will accept herself	4	0 1
her niece would kick herself	4	0 1
our boy can accept himself	4	0 1
some lord would comfort himself	4	0 1
the uncle could remember himself	4	0 1
your queen who can swim could comfort herself	7	0 1
her nephew will accept himself	4	0 1
our boy can remember himself	4	0 1
her father could accept himself	4	0 1
her sister can hit herself	4	0 1
the monk will remember himself	4	0 1
her lady that would eat could love herself	7	0 1
the boy will clean himself	4	0 1
her father that will sleep can hit himself	7	0 1
some wife could hit herself	4	0 1
our wizard could hit himself	4	0 1
your brother who could read can comfort himself	7	0 1
our actress that will eat can hurt herself	7	0 1
my girl would dress herself	4	0 1
our wife could accept herself	4	0 1
my aunt could clean herself	4	0 1
some nephew could dress himself	4	0 1
my man will hit himself	4	0 1
some brother will kick himself	4	0 1
your brother can hit himself	4	0 1
my nun who will wait will accept herself	7	0 1
our boy who could read can hurt himself	7	0 1
her man could accept himself	4	0 1
our actor would clean himself	4	0 1
the mother would love herself	4	0 1
her aunt could dress herself	4	0 1
some husband who would change could hurt himself	7	0 1
your sister could accept herself	4	0 1
your mother could love herself	4	0 1
her nephew will love himself	4	0 1
my brother would comfort himself	4	0 1
our girl would hurt herself	4	0 1
her nun would clean herself	4	0 1
my actress will remember herself	4	0 1
my mother that would move will clean herself	7	0 1
my wife would remember herself	4	0 1
her lady would hit herself	4	0 1
some brother can accept himself	4	0 1
her husband would love himself	4	0 1
the uncle that will eat can accept himself	7	0 1
the princess can kick herself	4	0 1
my nephew that will smile could kick himself	7	0 1
your actor will hurt himself	4	0 1
the aunt would clean herself	4	0 1
her actor can hurt himself	4	0 1
the wizard can dress himself	4	0 1
your wizard will accept himself	4	0 1
your niece who would move can hurt herself	7	0 1
my man can dress himself	4	0 1
the actress can accept herself	4	0 1
some princess can hit herself	4	0 1
my witch who can read will dress herself	7	0 1
our aunt could love herself	4	0 1
your girl would kick herself	4	0 1
my princess would comfort herself	4	0 1
the man could love himself	4	0 1
our father will hurt himself	4	0 1
our lord would comfort himself	4	0 1
the actor could dress himself	4	0 1
our niece will kick herself	4	0 1
your lord will comfort himself	4	0 1
some monk will dress himself	4	0 1
her princess that could cry could comfort herself	7	0 1
my brother could remember himself	4	0 1
the boy can love himself	4	0 1
my witch could dress herself	4	0 1
her king can dress himself	4	0 1
our niece will comfort herself	4	0 1
her nun would kick herself	4	0 1
my queen can hit herself	4	0 1
my brother will hit himself	4	0 1
some actor who would sleep will accept himself	7	0 1
the actor who can swim would kick himself	7	0 1
her princess can clean herself	4	0 1
my nun could kick herself	4	0 1
the niece would dress herself	4	0 1
some boy who will change can hit himself	7	0 1
our queen would hit herself	4	0 1
her king that will sleep could clean himself	7	0 1
our monk who could cry will accept himself	7	0 1
some nephew could accept himself	4	0 1
the nephew would dress himself	4	0 1
my monk can dress himself	4	0 1
my wizard could hurt himself	4	0 1
some lady would remember herself	4	0 1
some mother could accept herself	4	0 1
our man will love himself	4	0 1
your king could kick himself	4	0 1
my lord that can cry could dress himself	7	0 1
my father would hurt himself	4	0 1
the princess could hit herself	4	0 1
your boy who can smile would comfort himself	7	0 1
my girl could comfort herself	4	0 1
her uncle could dress himself	4	0 1
the niece can kick herself	4	0 1
my actress will hurt herself	4	0 1
her brother that could smile will hit himself	7	0 1
my witch can kick herself	4	0 1
her wizard can hit himself	4	0 1
some queen would remember herself	4	0 1
your prince who will cry will hurt himself	7	0 1
some prince can accept himself	4	0 1
her princess would dress herself	4	0 1
my wife will remember herself	4	0 1
our actor can remember himself	4	0 1
her king will accept himself	4	0 1
my man can comfort himself	4	0 1
our witch that would read could remember herself	7	0 1
the mother could kick herself	4	0 1
her monk will remember himself	4	0 1
some lord could remember himself	4	0 1
some man can comfort himself	4	0 1
our lord can love himself	4	0 1
the lord would dress himself	4	0 1
the sister that could cry will clean herself	7	0 1
her niece can accept herself	4	0 1
your nun could kick herself	4	0 1
my actor that can smile could remember himself	7	0 1
her lord will dress himself	4	0 1
my king that would change will hit himself	7	0 1
our girl that will read can remember herself	7	0 1
our man can accept himself	4	0 1
my sister who would wait would clean herself	7	0 1
some boy will clean himself	4	0 1
our lord would kick himself	4	0 1
her actor could hit himself	4	0 1
the wizard would hit himself	4	0 1
your actor would accept himself	4	0 1
our nun would remember herself	4	0 1
my mother will remember herself	4	0 1
the princess can love herself	4	0 1
some wizard could clean himself	4	0 1
the aunt can hurt herself	4	0 1
the actor can love himself	4	0 1
your wife could love herself	4	0 1
her brother could hurt himself	4	0 1
our father that will change will dress himself	7	0 1
my actor would love himself	4	0 1
her wife can kick herself	4	0 1
some nun could dress herself	4	0 1
my lord will love himself	4	0 1
your monk would accept himself	4	0 1
her man could comfort himself	4	0 1
your lady could remember herself	4	0 1
my sister that would swim will love herself	7	0 1
my prince could remember himself	4	0 1
some uncle can comfort himself	4	0 1
our boy could kick himself	4	0 1
the king can dress himself	4	0 1
some father will hit himself	4	0 1
my mother can dress herself	4	0 1
some witch will love herself	4	0 1
my nephew can remember himself	4	0 1
the woman can hit herself	4	0 1
the sister will hurt herself	4	0 1
the boy could remember himself	4	0 1
our nun that can wait could comfort herself	7	0 1
your nun can kick herself	4	0 1
our actor would remember himself	4	0 1
her girl will comfort herself	4	0 1
our girl will clean herself	4	0 1
our man will hit himself	4	0 1
your monk that will move can kick himself	7	0 1
our aunt would accept herself	4	0 1
some actor would remember himself	4	0 1
my woman can hurt herself	4	0 1
our sister who will read can comfort herself	7	0 1
my wizard will hit himself	4	0 1
our niece can accept herself	4	0 1
my lady would clean herself	4	0 1
the sister that would eat can remember herself	7	0 1
her king can accept himself	4	0 1
our nun will dress herself	4	0 1
my actor will hit himself	4	0 1
my niece will love herself	4	0 1
my uncle can love himself	4	0 1
the wizard who can move would hit himself	7	0 1
my father would love himself	4	0 1
her lady will hit herself	4	0 1
some sister would remember herself	4	0 1
some brother could accept himself	4	0 1
the actor can clean himself	4	0 1
the girl could hit herself	4	0 1
some nun could kick herself	4	0 1
our brother that can cry would accept himself	7	0 1
your nun will hurt herself	4	0 1
your lord could clean himself	4	0 1
my nun will comfort herself	4	0 1
the king can accept himself	4	0 1
some uncle can hurt himself	4	0 1
your actress could kick herself	4	0 1
some mother would clean herself	4	0 1
your niece would love herself	4	0 1
her wizard can hurt himself	4	0 1
our niece would accept herself	4	0 1
the husband could comfort himself	4	0 1
the queen who would sleep could comfort herself	7	0 1
some actress would hurt herself	4	0 1
the queen will clean herself	4	0 1
the woman will clean herself	4	0 1
my wizard will dress himself	4	0 1
my aunt who could move can love herself	7	0 1
some queen would dress herself	4	0 1
her woman who could swim would hurt herself	7	0 1
the man can accept himself	4	0 1
some man will hit himself	4	0 1
your niece could clean herself	4	0 1
the lord can kick himself	4	0 1
the uncle could dress himself	4	0 1
my actress would love herself	4	0 1
her woman who could move would dress herself	7	0 1
her brother will love himself	4	0 1
her actor would hit himself	4	0 1
our wife would comfort herself	4	0 1
some girl can love herself	4	0 1
my mother can clean herself	4	0 1
some actor can comfort himself	4	0 1
her aunt who will change will remember herself	7	0 1
her actress who would cry could hit herself	7	0 1
the actress can hit herself	4	0 1
some uncle will kick himself	4	0 1
some monk who would swim can hurt himself	7	0 1
her boy would accept himself	4	0 1
my queen would accept herself	4	0 1
your princess that can wait will love herself	7	0 1
her actress who will smile could dress herself	7	0 1
my lord would hurt himself	4	0 1
the woman that can smile could remember herself	7	0 1
my nun who can move could comfort herself	7	0 1
the man could kick himself	4	0 1
our man will comfort himself	4	0 1
some princess will hit herself	4	0 1
our father would kick himself	4	0 1
your nephew would clean himself	4	0 1
her king would remember himself	4	0 1
my wizard can comfort himself	4	0 1
the uncle would love himself	4	0 1
her nephew could remember himself	4	0 1
our actor would hit himself	4	0 1
your actress would love herself	4	0 1
our prince could clean himself	4	0 1
the brother could accept himself	4	0 1
her wife can hit herself	4	0 1
her wife will hurt herself	4	0 1
some mother can remember herself	4	0 1
your aunt would hurt herself	4	0 1
her wife could hurt herself	4	0 1
your man who will sleep will hit himself	7	0 1
your mother can kick herself	4	0 1
the woman that would wait would accept herself	7	0 1
your husband will love himself	4	0 1
the uncle can clean himself	4	0 1
some father will accept himself	4	0 1
your princess can hit herself	4	0 1
some king could clean himself	4	0 1
some nephew can accept himself	4	0 1
our mother could accept herself	4	0 1
my queen will accept herself	4	0 1
the witch will dress herself	4	0 1
some lady could remember herself	4	0 1
her boy can love himself	4	0 1
the queen can hurt herself	4	0 1
my woman could kick herself	4	0 1
her woman would comfort herself	4	0 1
our husband that could wait will comfort himself	7	0 1
your nephew who could swim could love himself	7	0 1
your wife will comfort herself	4	0 1
her niece can hurt herself	4	0 1
some brother that can change could remember himself	7	0 1
her father can remember himself	4	0 1
some woman would remember herself	4	0 1
your prince could comfort himself	4	0 1
some wife who would swim could hurt herself	7	0 1
some nun can hit herself	4	0 1
your husband that will wait will dress himself	7	0 1
our man would dress himself	4	0 1
our father could love himself	4	0 1
the boy who would swim could dress himself	7	0 1
her actor can love himself	4	0 1
our princess could remember herself	4	0 1
my wife would hit herself	4	0 1
some mother can hit herself	4	0 1
some witch that will move will accept herself	7	0 1
your actress that can wait would accept herself	7	0 1
some father can accept himself	4	0 1
your father will kick himself	4	0 1
her monk can comfort himself	4	0 1
our boy will comfort himself	4	0 1
my nun will remember herself	4	0 1
the aunt who could read would accept herself	7	0 1
my wizard could love himself	4	0 1
some prince could kick himself	4	0 1
my father could clean himself	4	0 1
her girl could comfort herself	4	0 1
the actor could kick himself	4	0 1
the sister would hurt herself	4	0 1
your actor would hit himself	4	0 1
your mother would hit herself	4	0 1
our father would accept himself	4	0 1
your brother would comfort himself	4	0 1
your lord who can cry would dress himself	7	0 1
my witch would kick herself	4	0 1
some niece that could change can hit herself	7	0 1
our mother who would eat could clean herself	7	0 1
my man could hit himself	4	0 1
her husband could hurt himself	4	0 1
my actress could hit herself	4	0 1
some wizard would clean himself	4	0 1
her nun will accept herself	4	0 1
my wizard will comfort himself	4	0 1
my mother could dress herself	4	0 1
our boy would love himself	4	0 1
her witch can remember herself	4	0 1
some aunt can comfort herself	4	0 1
the girl would dress herself	4	0 1
my monk would hit himself	4	0 1
some witch that will smile could love herself	7	0 1
the brother would hit himself	4	0 1
your actress who would cry would accept herself	7	0 1
some boy who can cry would love himself	7	0 1
her uncle will accept himself	4	0 1
some nephew can dress himself	4	0 1
her sister could accept herself	4	0 1
some aunt can dress herself	4	0 1
your sister that can read will clean herself	7	0 1
my sister will dress herself	4	0 1
my sister who will wait would love herself	7	0 1
our uncle that would swim can kick himself	7	0 1
our wizard who would swim can accept himself	7	0 1
my nun could love herself	4	0 1
your nun who will move can hit herself	7	0 1
some aunt who will move can hurt herself	7	0 1
her man will remember himself	4	0 1
the man would love himself	4	0 1
the king would dress himself	4	0 1
my monk could dress himself	4	0 1
the prince would hit himself	4	0 1
her sister will accept herself	4	0 1
her mother can kick herself	4	0 1
her princess could remember herself	4	0 1
the man could accept himself	4	0 1
my uncle will remember himself	4	0 1
the man will accept himself	4	0 1
some girl that would swim would dress herself	7	0 1
the king will kick himself	4	0 1
her prince could comfort himself	4	0 1
her aunt will hurt herself	4	0 1
her uncle will love himself	4	0 1
some princess could hit herself	4	0 1
the brother could love himself	4	0 1
your father would kick himself	4	0 1
my uncle will hit himself	4	0 1
your monk can kick himself	4	0 1
my king can clean himself	4	0 1
some sister would hurt herself	4	0 1
some father that could swim will kick himself	7	0 1
some girl will kick herself	4	0 1
my boy can kick himself	4	0 1
your wizard can hit himself	4	0 1
your prince will hit himself	4	0 1
your girl can clean herself	4	0 1
your actor will love himself	4	0 1
your niece can kick herself	4	0 1
her prince will remember himself	4	0 1
her uncle can hurt himself	4	0 1
our lady will comfort herself	4	0 1
your aunt could accept herself	4	0 1
some prince who can change could kick himself	7	0 1
your niece would dress herself	4	0 1
our witch can comfort herself	4	0 1
some father could comfort himself	4	0 1
our father can accept himself	4	0 1
her father can love himself	4	0 1
our husband could hurt himself	4	0 1
some lord could comfort himself	4	0 1
some monk who will smile would love himself	7	0 1
some father will kick himself	4	0 1
our father will accept himself	4	0 1
your lord can remember himself	4	0 1
her lady will accept herself	4	0 1
my lord could hit himself	4	0 1
my king that can wait will love himself	7	0 1
our woman will accept herself	4	0 1
our aunt would hit herself	4	0 1
our monk would accept himself	4	0 1
some uncle would kick himself	4	0 1
our man can love himself	4	0 1
our wife would hurt herself	4	0 1
my wizard who can change will dress himself	7	0 1
some witch can hit herself	4	0 1
the nun can dress herself	4	0 1
my girl could remember herself	4	0 1
your mother could hit herself	4	0 1
your boy who would change would kick himself	7	0 1
her nun that can wait could kick herself	7	0 1
the woman could clean herself	4	0 1
the wife who can wait would kick herself	7	0 1
our king could accept himself	4	0 1
your lord could accept himself	4	0 1
the queen who would cry will accept herself	7	0 1
her mother could love herself	4	0 1
the boy would clean himself	4	0 1
the prince will remember himself	4	0 1
your husband would comfort himself	4	0 1
her princess would remember herself	4	0 1
the nun that can read would remember herself	7	0 1
the brother could clean himself	4	0 1
our princess can dress herself	4	0 1
our woman can hurt herself	4	0 1
our princess would hit herself	4	0 1
her monk could comfort himself	4	0 1
some father could clean himself	4	0 1
my king who can smile will love himself	7	0 1
her husband would remember himself	4	0 1
our queen can hurt herself	4	0 1
some lord can kick himself	4	0 1
our uncle will love himself	4	0 1
some actress would clean herself	4	0 1
your princess will hit herself	4	0 1
your uncle will accept himself	4	0 1
my father who could swim could clean himself	7	0 1
some aunt could remember herself	4	0 1
her actor that will sleep would clean himself	7	0 1
some mother can love herself	4	0 1
my monk would accept himself	4	0 1
some mother would dress herself	4	0 1
the aunt would kick herself	4	0 1
some niece will love herself	4	0 1
her brother could love himself	4	0 1
the actor will comfort himself	4	0 1
my niece who can swim would clean herself	7	0 1
our actress will hurt herself	4	0 1
some witch will dress herself	4	0 1
her woman that could cry could dress herself	7	0 1
her nun could hit herself	4	0 1
her uncle who could change can hurt himself	7	0 1
the uncle will kick himself	4	0 1
the actor will clean himself	4	0 1
some actress could clean herself	4	0 1
your nephew will kick himself	4	0 1
the uncle can remember himself	4	0 1
the aunt can accept herself	4	0 1
your man will accept himself	4	0 1
some boy would dress himself	4	0 1
my nun that would eat can remember herself	7	0 1
her actress would comfort herself	4	0 1
the lord will hurt himself	4	0 1
my aunt can dress herself	4	0 1
some brother could love himself	4	0 1
our monk can love himself	4	0 1
our lord would hurt himself	4	0 1
her actress could clean herself	4	0 1
our woman that could change could comfort herself	7	0 1
your woman who could change can hurt herself	7	0 1
the prince who can sleep can remember himself	7	0 1
our father could hit himself	4	0 1
my woman who could smile could hit herself	7	0 1
some father could kick himself	4	0 1
the monk would love himself	4	0 1
your woman could hit herself	4	0 1
some prince could comfort himself	4	0 1
her nephew can dress himself	4	0 1
the aunt can comfort herself	4	0 1
her girl would comfort herself	4	0 1
the man who can sleep could accept himself	7	0 1
your actress will accept herself	4	0 1
my niece would love herself	4	0 1
the man would comfort himself	4	0 1
the king will dress himself	4	0 1
your witch would accept herself	4	0 1
some mother could comfort herself	4	0 1
our nun would accept herself	4	0 1
my mother will dress herself	4	0 1
your uncle will dress himself	4	0 1
my lady would kick herself	4	0 1
my witch would love herself	4	0 1
her actor will hit himself	4	0 1
my nun can remember herself	4	0 1
the father would accept himself	4	0 1
the mother can love herself	4	0 1
our actress will clean herself	4	0 1
some lady could clean herself	4	0 1
some woman can dress herself	4	0 1
her girl can clean herself	4	0 1
our wife will kick herself	4	0 1
our woman would kick herself	4	0 1
your uncle who could change could love himself	7	0 1
the uncle will hit himself	4	0 1
your woman will accept herself	4	0 1
her father would accept himself	4	0 1
her wizard will hurt himself	4	0 1
my nun can clean herself	4	0 1
her queen who could move will hurt herself	7	0 1
some sister will hurt herself	4	0 1
your wife would remember herself	4	0 1
some monk could kick himself	4	0 1
your wizard would hit himself	4	0 1
some king will accept himself	4	0 1
some lady can clean herself	4	0 1
the actor could clean himself	4	0 1
her woman could hurt herself	4	0 1
some aunt that would change can clean herself	7	0 1
some uncle could hurt himself	4	0 1
my nephew would dress himself	4	0 1
the monk will clean himself	4	0 1
her lord would dress himself	4	0 1
her woman can accept herself	4	0 1
your witch can comfort herself	4	0 1
the husband can love himself	4	0 1
her brother who could move could comfort himself	7	0 1
our aunt who would smile can love herself	7	0 1
our niece could love herself	4	0 1
my prince will kick himself	4	0 1
our man would accept himself	4	0 1
my nun would hurt herself	4	0 1
the niece could accept herself	4	0 1
my king who could read could dress himself	7	0 1
some king who would move will dress himself	7	0 1
our man will dress himself	4	0 1
our father will kick himself	4	0 1
my lady would comfort herself	4	0 1
the king can kick himself	4	0 1
some uncle will dress himself	4	0 1
your wife can comfort herself	4	0 1
the woman could remember herself	4	0 1
our mother can accept herself	4	0 1
her aunt will clean herself	4	0 1
our boy would dress himself	4	0 1
our nephew could kick himself	4	0 1
your nephew who can smile will hit himself	7	0 1
my sister who can sleep can kick herself	7	0 1
some father would clean himself	4	0 1
her girl can accept herself	4	0 1
my nun would remember herself	4	0 1
our girl could dress herself	4	0 1
the husband will love himself	4	0 1
my wife can love herself	4	0 1
my nephew could comfort himself	4	0 1
our aunt can love herself	4	0 1
our nun will clean herself	4	0 1
the woman can kick herself	4	0 1
our nun would kick herself	4	0 1
the monk will dress himself	4	0 1
our man could remember himself	4	0 1
your uncle can accept himself	4	0 1
your lady could clean herself	4	0 1
my actor could comfort himself	4	0 1
our nun would clean herself	4	0 1
our uncle could remember himself	4	0 1
our lord can accept himself	4	0 1
the prince could accept himself	4	0 1
your father could dress himself	4	0 1
some aunt that would move could hurt herself	7	0 1
her king could remember himself	4	0 1
your father who can change could love himself	7	0 1
my actor that can sleep would dress himself	7	0 1
our brother can love himself	4	0 1
the nun could hurt herself	4	0 1
some wizard could remember himself	4	0 1
the husband will remember himself	4	0 1
the nun could dress herself	4	0 1
my wife would kick herself	4	0 1
your wife could accept herself	4	0 1
our girl will hurt herself	4	0 1
my princess can dress herself	4	0 1
the princess who can sleep can hit herself	7	0 1
some actress who could smile could remember herself	7	0 1
the wizard will love himself	4	0 1
some queen would hurt herself	4	0 1
her prince can dress himself	4	0 1
my man who would smile would comfort himself	7	0 1
your prince will love himself	4	0 1
her witch who would change would kick herself	7	0 1
the woman would dress herself	4	0 1
our queen will remember herself	4	0 1
my princess who can wait would clean herself	7	0 1
my sister can accept herself	4	0 1
your prince could remember himself	4	0 1
your brother will remember himself	4	0 1
your actress who could cry could remember herself	7	0 1
some witch would hit herself	4	0 1
my actor could love himself	4	0 1
our actress would kick herself	4	0 1
some uncle will hurt himself	4	0 1
our prince will kick himself	4	0 1
the princess would kick herself	4	0 1
our nun can kick herself	4	0 1
her brother would hurt himself	4	0 1
my queen can dress herself	4	0 1
her brother could clean himself	4	0 1
some wife will kick herself	4	0 1
her lady can accept herself	4	0 1
our husband can clean himself	4	0 1
some girl would kick herself	4	0 1
my prince who can cry will hurt himself	7	0 1
our king will hurt himself	4	0 1
my queen could accept herself	4	0 1
some actress would accept herself	4	0 1
our uncle will clean himself	4	0 1
my uncle will dress himself	4	0 1
her husband who would sleep can comfort himself	7	0 1
my uncle could love himself	4	0 1
some lady can remember herself	4	0 1
my prince would hurt himself	4	0 1
some father could hurt himself	4	0 1
some nephew will kick himself	4	0 1
the lord can dress himself	4	0 1
her nephew would love himself	4	0 1
the witch will kick herself	4	0 1
your queen will hurt herself	4	0 1
my wife can hurt herself	4	0 1
our girl will hit herself	4	0 1
your niece that could read would remember herself	7	0 1
our sister will remember herself	4	0 1
her actor that could sleep would hit himself	7	0 1
the lady could kick herself	4	0 1
our queen can love herself	4	0 1
the monk will love himself	4	0 1
her king will clean himself	4	0 1
your witch who would move could accept herself	7	0 1
my mother will comfort herself	4	0 1
our king who would move could hit himself	7	0 1
her man could love himself	4	0 1
the actress can dress herself	4	0 1
the queen could kick herself	4	0 1
her uncle could accept himself	4	0 1
our husband will accept himself	4	0 1
our actor would hurt himself	4	0 1
some prince can clean himself	4	0 1
the nun will hit herself	4	0 1
some husband will hit himself	4	0 1
the monk would accept himself	4	0 1
the actor can comfort himself	4	0 1
our prince could comfort himself	4	0 1
my monk can clean himself	4	0 1
your man could kick himself	4	0 1
my prince would kick himself	4	0 1
some lord will hurt himself	4	0 1
the actress will hit herself	4	0 1
some man would comfort himself	4	0 1
your queen would love herself	4	0 1
her nephew would remember himself	4	0 1
her nephew would hurt himself	4	0 1
my nun can comfort herself	4	0 1
your girl can comfort herself	4	0 1
her lady can dress herself	4	0 1
your actor could hurt himself	4	0 1
our mother who could sleep could comfort herself	7	0 1
our king could kick himself	4	0 1
your mother will hit herself	4	0 1
some witch can love herself	4	0 1
her king would comfort himself	4	0 1
the queen will hit herself	4	0 1
our actor could comfort himself	4	0 1
some actress can hit herself	4	0 1
the father that could cry can kick himself	7	0 1
the niece will dress herself	4	0 1
my wife that will cry will remember herself	7	0 1
her man would love himself	4	0 1
the nephew that would smile will hurt himself	7	0 1
your wife could comfort herself	4	0 1
my niece will kick herself	4	0 1
your sister would hurt herself	4	0 1
my king can remember himself	4	0 1
your uncle will love himself	4	0 1
our nephew who will change can kick himself	7	0 1
her girl that will move would clean herself	7	0 1
my nephew that will wait would comfort himself	7	0 1
the actor would hurt himself	4	0 1
her nephew will remember himself	4	0 1
her princess could hit herself	4	0 1
her wife would kick herself	4	0 1
her prince will dress himself	4	0 1
some brother could comfort himself	4	0 1
some nephew would remember himself	4	0 1
my princess would love herself	4	0 1
her princess can remember herself	4	0 1
your actor would dress himself	4	0 1
some brother would hurt himself	4	0 1
your woman would dress herself	4	0 1
the man would hurt himself	4	0 1
my woman would kick herself	4	0 1
my nun can dress herself	4	0 1
my princess will love herself	4	0 1
her wizard will love himself	4	0 1
some witch can accept herself	4	0 1
the man could hurt himself	4	0 1
her girl can kick herself	4	0 1
some monk would love himself	4	0 1
your queen can hit herself	4	0 1
my sister who would swim can accept herself	7	0 1
my wife would hurt herself	4	0 1
the sister who will change could kick herself	7	0 1
some nun could clean herself	4	0 1
the monk can love himself	4	0 1
our woman that will sleep could clean herself	7	0 1
the husband would hit himself	4	0 1
the husband will hurt himself	4	0 1
our uncle will accept himself	4	0 1
your wife that could swim would clean herself	7	0 1
the princess can hit herself	4	0 1
your niece that can change would clean herself	7	0 1
our lady could comfort herself	4	0 1
the queen will remember herself	4	0 1
my prince can remember himself	4	0 1
my actress could kick herself	4	0 1
some prince who can eat can love himself	7	0 1
your actor that would move would remember himself	7	0 1
her father will accept himself	4	0 1
some princess would kick herself	4	0 1
your monk that can swim could remember himself	7	0 1
our girl could kick herself	4	0 1
some witch could clean herself	4	0 1
your actress would kick herself	4	0 1
my husband will clean himself	4	0 1
her wife that will read could comfort herself	7	0 1
your nephew would remember himself	4	0 1
your wife that can swim would love herself	7	0 1
the boy could love himself	4	0 1
some brother could dress himself	4	0 1
some princess that would move will dress herself	7	0 1
her husband could remember himself	4	0 1
our boy that will sleep can clean himself	7	0 1
some brother can kick himself	4	0 1
her lord can love himself	4	0 1
your woman will dress herself	4	0 1
the aunt that can smile will dress herself	7	0 1
some lady will kick herself	4	0 1
our lord who can change could hit himself	7	0 1
your actress will remember herself	4	0 1
your mother that would eat will clean herself	7	0 1
her witch would dress herself	4	0 1
the woman can remember herself	4	0 1
the mother can remember herself	4	0 1
my queen will dress herself	4	0 1
your uncle that can sleep can comfort himself	7	0 1
her nephew could clean himself	4	0 1
her prince can hurt himself	4	0 1
the sister would hit herself	4	0 1
my witch will love herself	4	0 1
our wife could kick herself	4	0 1
the king that can sleep could love himself	7	0 1
her nephew could hurt himself	4	0 1
some aunt can hit herself	4	0 1
her aunt would love herself	4	0 1
your aunt can love herself	4	0 1
our mother would accept herself	4	0 1
your wizard could comfort himself	4	0 1
my monk can remember himself	4	0 1
your actress could comfort herself	4	0 1
my lord could hurt himself	4	0 1
her niece could hurt herself	4	0 1
the princess who would change could love herself	7	0 1
the woman could comfort herself	4	0 1
the king can comfort himself	4	0 1
our woman will remember herself	4	0 1
your woman could dress herself	4	0 1
the wizard would dress himself	4	0 1
some lord could hit himself	4	0 1
her girl could clean herself	4	0 1
my man could love himself	4	0 1
the brother could dress himself	4	0 1
the niece will hit herself	4	0 1
some lady can hit herself	4	0 1
her prince that can change will clean himself	7	0 1
your king can love himself	4	0 1
your king will hurt himself	4	0 1
our mother would love herself	4	0 1
her nun will comfort herself	4	0 1
our queen would remember herself	4	0 1
her lady could hit herself	4	0 1
the uncle who could wait would kick himself	7	0 1
the nephew can comfort himself	4	0 1
her nun can comfort herself	4	0 1
my man who will eat can remember himself	7	0 1
my actress will comfort herself	4	0 1
our wife would clean herself	4	0 1
my prince can dress himself	4	0 1
the king could hurt himself	4	0 1
the wizard could clean himself	4	0 1
our girl could comfort herself	4	0 1
your husband would clean himself	4	0 1
my monk can comfort himself	4	0 1
the niece will love herself	4	0 1
my boy who can move can dress himself	7	0 1
our uncle would remember himself	4	0 1
our wizard would comfort himself	4	0 1
the sister could hit herself	4	0 1
the wife would kick herself	4	0 1
some woman that could swim can kick herself	7	0 1
your lady will comfort herself	4	0 1
my wizard can remember himself	4	0 1
my woman will kick herself	4	0 1
our actor could clean himself	4	0 1
some lady could dress herself	4	0 1
the princess will hit herself	4	0 1
our man can dress himself	4	0 1
some brother would dress himself	4	0 1
her man that could eat can kick himself	7	0 1
your man will remember himself	4	0 1
some father will dress himself	4	0 1
the uncle would hit himself	4	0 1
the wife can kick herself	4	0 1
your lady can hit herself	4	0 1
your lady will remember herself	4	0 1
my brother can clean himself	4	0 1
some actor would hit himself	4	0 1
some lord can comfort himself	4	0 1
some king could comfort himself	4	0 1
some wife could remember herself	4	0 1
our wife can hit herself	4	0 1
the lady can remember herself	4	0 1
her lady would love herself	4	0 1
the nun would clean herself	4	0 1
her actress will love herself	4	0 1
our lady could hit herself	4	0 1
some prince would kick himself	4	0 1
her witch will hurt herself	4	0 1
my lady could dress herself	4	0 1
her prince can clean himself	4	0 1
your actress will hurt herself	4	0 1
some queen could comfort herself	4	0 1
the actor can remember himself	4	0 1
your sister that could swim would clean herself	7	0 1
some princess can dress herself	4	0 1
some king could hurt himself	4	0 1
the sister can accept herself	4	0 1
her lady that would sleep will love herself	7	0 1
your boy could accept himself	4	0 1
her father would hurt himself	4	0 1
her monk who can eat could comfort himself	7	0 1
some lady would hurt herself	4	0 1
my sister who can smile can kick herself	7	0 1
our king would hurt himself	4	0 1
my king who could smile will hurt himself	7	0 1
her nephew would dress himself	4	0 1
the monk can hit himself	4	0 1
[truncated: 8,000 more rows]
