# Supplementary material
Source: ML conference proceedings conference paper supplement (https://aclanthology.org/2020.findings-emnlp.419)
Supplement: OptionalSupplementaryMaterial [file 2020.findings-emnlp.419.OptionalSupplementaryMaterial.zip › AttentionGuidance-main/linguistic_probing/requirements.txt]

torch
tensorboard
scikit-learn
seqeval
psutil
sacrebleu
rouge-score
tensorflow_datasets
pytorch-lightning==0.7.3  # April 10, 2020 release
matplotlib
