# Supplementary material
Source: ML conference proceedings conference paper supplement (https://aclanthology.org/2020.findings-emnlp.419)
Supplement: OptionalSupplementaryMaterial [file 2020.findings-emnlp.419.OptionalSupplementaryMaterial.zip › AttentionGuidance-main/linguistic_probing/small_reflexive.txt]

our prince will love himself	4	0 1
her girl could hurt herself	4	0 1
my nun would accept herself	4	0 1
the girl would kick herself	4	0 1
our princess would accept herself	4	0 1
the actor who could smile could hurt himself	7	0 1
her actress can comfort herself	4	0 1
your king would accept himself	4	0 1
our queen could clean herself	4	0 1
the king could kick himself	4	0 1
our princess will remember herself	4	0 1
our woman will comfort herself	4	0 1
her aunt can kick herself	4	0 1
our brother would dress himself	4	0 1
our sister will hurt herself	4	0 1
our wizard could love himself	4	0 1
the nun could kick herself	4	0 1
some lord will clean himself	4	0 1
the girl would love herself	4	0 1
the actress can remember herself	4	0 1
the wife can hurt herself	4	0 1
our actress who could change could remember herself	7	0 1
her boy would love himself	4	0 1
the lord could dress himself	4	0 1
our wife can remember herself	4	0 1
the princess can accept herself	4	0 1
her aunt can hurt herself	4	0 1
some witch could remember herself	4	0 1
my king could love himself	4	0 1
the queen would comfort herself	4	0 1
my wife can dress herself	4	0 1
the uncle who could eat could hit himself	7	0 1
some wizard will comfort himself	4	0 1
your king that would read would accept himself	7	0 1
the witch who will wait will hit herself	7	0 1
my queen will love herself	4	0 1
your princess can kick herself	4	0 1
some man could hit himself	4	0 1
our actress can accept herself	4	0 1
the brother can accept himself	4	0 1
my wizard who could change could remember himself	7	0 1
the witch would hit herself	4	0 1
your aunt can accept herself	4	0 1
your woman would love herself	4	0 1
our lord will dress himself	4	0 1
her niece will love herself	4	0 1
your boy could dress himself	4	0 1
some actor could remember himself	4	0 1
the wife could accept herself	4	0 1
your wizard would clean himself	4	0 1
some boy that could wait would clean himself	7	0 1
some prince will hit himself	4	0 1
some aunt could kick herself	4	0 1
the brother who can wait could accept himself	7	0 1
her lady will dress herself	4	0 1
her lady would hurt herself	4	0 1
some sister can hurt herself	4	0 1
my witch would remember herself	4	0 1
my lord could comfort himself	4	0 1
